# Supplementary material
Source: MDPI journal article supplement (https://www.mdpi.com/2304-6740/6/1/27)
Supplement: s1 [file s1]

Archive with 6 entries (6 files):
- 9bIr_Fig2_Grot304.cif
- 9bIr_plus_KPF6_Fig1_Grot292.cif
- 9bRh_Fig3_GROT319.cif
- checkcif_9bIr_Fig2.pdf
- checkcif_9bIr_w_KPF6_Fig1.pdf
- checkcif_9bRh_Fig3.pdf
