# Supplementary material
Source: MDPI journal article supplement (https://www.mdpi.com/2304-6740/6/1/27)
Supplement: s1 [file s1 › 9bIr_Fig2_Grot304.cif]

data_grot304
_audit_creation_date              2017-12-27
_audit_creation_method
;
Olex2 1.2
(compiled 2017.08.10 svn.r3458 for OlexSys, GUI svn.r5381)
;
_shelx_SHELXL_version_number      '2014/7'
_publ_contact_author_address      ?
_publ_contact_author_email        ?
_publ_contact_author_id_orcid     ?
_publ_contact_author_name         ''
_publ_contact_author_phone        ?
_publ_section_references
;
Burla, M.C., Caliandro, R., Camalli, M., Carrozzini, B., Cascarano, G.L.,
 De Caro, L., Giacovazzo, C., Polidori, G., Siliqi, D., Spagna, R.
 (2007). J. Appl. Cryst. 40, 609-613.

Dolomanov, O.V., Bourhis, L.J., Gildea, R.J, Howard, J.A.K. & Puschmann, H.
 (2009), J. Appl. Cryst. 42, 339-341.

Sheldrick, G.M. (2008). Acta Cryst. A64, 112-122.
;
_chemical_name_common             ?
_chemical_name_systematic
;
 ? 
;
_chemical_formula_moiety          'C23 H32 Cl Ir N3, F6 P, 1.5(C4 H8 O)'
_chemical_formula_sum             'C29 H44 Cl F6 Ir N3 O1.50 P'
_chemical_formula_weight          831.29
_chemical_melting_point           ?
loop_
  _atom_type_symbol
  _atom_type_description
  _atom_type_scat_dispersion_real
  _atom_type_scat_dispersion_imag
  _atom_type_scat_source
 'C' 'C' 0.0033 0.0016 'International Tables Vol C Tables 4.2.6.8 and 6.1.1.4'
 'H' 'H' 0.0000 0.0000 'International Tables Vol C Tables 4.2.6.8 and 6.1.1.4'
 'Cl' 'Cl' 0.1484 0.1585 'International Tables Vol C Tables 4.2.6.8 and 6.1.1.4'
 'F' 'F' 0.0171 0.0103 'International Tables Vol C Tables 4.2.6.8 and 6.1.1.4'
 'Ir' 'Ir' -1.4442 7.9887
 'International Tables Vol C Tables 4.2.6.8 and 6.1.1.4'
 'N' 'N' 0.0061 0.0033 'International Tables Vol C Tables 4.2.6.8 and 6.1.1.4'
 'O' 'O' 0.0106 0.0060 'International Tables Vol C Tables 4.2.6.8 and 6.1.1.4'
 'P' 'P' 0.1023 0.0942 'International Tables Vol C Tables 4.2.6.8 and 6.1.1.4'

_shelx_space_group_comment
;
The symmetry employed for this shelxl refinement is uniquely defined
by the following loop, which should always be used as a source of
symmetry information in preference to the above space-group names.
They are only intended as comments.
;
_space_group_crystal_system       'orthorhombic'
_space_group_IT_number            60
_space_group_name_H-M_alt         'P b c n'
_space_group_name_Hall            '-P 2n 2ab'
loop_
  _space_group_symop_operation_xyz
 'x, y, z'
 'x+1/2, -y+1/2, -z'
 '-x, y, -z+1/2'
 '-x+1/2, -y+1/2, z+1/2'
 '-x, -y, -z'
 '-x-1/2, y-1/2, z'
 'x, -y, z-1/2'
 'x-1/2, y-1/2, -z-1/2'

_cell_length_a                    11.9277(7)
_cell_length_b                    19.2100(11)
_cell_length_c                    28.2172(16)
_cell_angle_alpha                 90
_cell_angle_beta                  90
_cell_angle_gamma                 90
_cell_volume                      6465.4(6)
_cell_formula_units_Z             8
_cell_measurement_reflns_used     9938
_cell_measurement_temperature     120(2)
_cell_measurement_theta_max       28.15
_cell_measurement_theta_min       2.24
_shelx_estimated_absorpt_T_max    0.648
_shelx_estimated_absorpt_T_min    0.411
_exptl_absorpt_coefficient_mu     4.326
_exptl_absorpt_correction_T_max   0.6476
_exptl_absorpt_correction_T_min   0.4110
_exptl_absorpt_correction_type    multi-scan
_exptl_absorpt_process_details    SADABS
_exptl_absorpt_special_details    ?
_exptl_crystal_colour             yellow
_exptl_crystal_colour_primary     yellow
_exptl_crystal_density_diffrn     1.708
_exptl_crystal_density_meas       .
_exptl_crystal_density_method     'not measured'
_exptl_crystal_description        block
_exptl_crystal_F_000              3312
_exptl_crystal_size_max           0.25
_exptl_crystal_size_mid           0.16
_exptl_crystal_size_min           0.11
_exptl_special_details
;
 ? 
;
_exptl_transmission_factor_max    ?
_exptl_transmission_factor_min    ?
_diffrn_reflns_av_R_equivalents   0.0602
_diffrn_reflns_av_unetI/netI      0.0420
_diffrn_reflns_Laue_measured_fraction_full 0.899
_diffrn_reflns_Laue_measured_fraction_max 0.861
_diffrn_reflns_limit_h_max        15
_diffrn_reflns_limit_h_min        -15
_diffrn_reflns_limit_k_max        25
_diffrn_reflns_limit_k_min        -25
_diffrn_reflns_limit_l_max        16
_diffrn_reflns_limit_l_min        -36
_diffrn_reflns_number             54283
_diffrn_reflns_point_group_measured_fraction_full 0.899
_diffrn_reflns_point_group_measured_fraction_max 0.861
_diffrn_reflns_theta_full         25.000
_diffrn_reflns_theta_max          28.551
_diffrn_reflns_theta_min          2.010
_diffrn_ambient_temperature       120.0
_diffrn_detector_area_resol_mean  ?
_diffrn_measured_fraction_theta_full 0.899
_diffrn_measured_fraction_theta_max 0.861
_diffrn_measurement_device_type   'Bruker APEX-II CCD'
_diffrn_measurement_method        '\f and \w scans'
_diffrn_radiation_monochromator   'graphite'
_diffrn_radiation_type            MoK\a
_diffrn_radiation_wavelength      0.71073
_diffrn_source                    ?
_diffrn_standards_number          0
_reflns_Friedel_coverage          0.000
_reflns_Friedel_fraction_full     .
_reflns_Friedel_fraction_max      .
_reflns_number_gt                 5367
_reflns_number_total              7090
_reflns_special_details
;
 Reflections were merged by SHELXL according to the crystal
 class for the calculation of statistics and refinement.
 
 _reflns_Friedel_fraction is defined as the number of unique
 Friedel pairs measured divided by the number that would be
 possible theoretically, ignoring centric projections and
 systematic absences.
;
_reflns_threshold_expression      'I > 2\s(I)'
_computing_cell_refinement        'Bruker SAINT'
_computing_data_collection        'Bruker APEX2'
_computing_data_reduction         'Bruker SAINT'
_computing_molecular_graphics     'Olex2 (Dolomanov et al., 2009)'
_computing_publication_material   'Olex2 (Dolomanov et al., 2009)'
_computing_structure_refinement   'XL (Sheldrick, 2008)'
_computing_structure_solution     'SIR2004 (Burla et al., 2007)'
_refine_diff_density_max          1.198
_refine_diff_density_min          -0.859
_refine_diff_density_rms          0.122
_refine_ls_extinction_coef        .
_refine_ls_extinction_method      none
_refine_ls_goodness_of_fit_ref    1.022
_refine_ls_hydrogen_treatment     constr
_refine_ls_matrix_type            full
_refine_ls_number_parameters      417
_refine_ls_number_reflns          7090
_refine_ls_number_restraints      0
_refine_ls_R_factor_all           0.0487
_refine_ls_R_factor_gt            0.0287
_refine_ls_restrained_S_all       1.022
_refine_ls_shift/su_max           0.002
_refine_ls_shift/su_mean          0.000
_refine_ls_structure_factor_coef  Fsqd
_refine_ls_weighting_details
'w=1/[\s^2^(Fo^2^)+(0.0114P)^2^+11.8459P] where P=(Fo^2^+2Fc^2^)/3'
_refine_ls_weighting_scheme       calc
_refine_ls_wR_factor_gt           0.0502
_refine_ls_wR_factor_ref          0.0563
_refine_special_details           ?
_olex2_refinement_description
;
1. Fixed Uiso
 At 1.2 times of:
  All C(H) groups, All C(H,H) groups, All N(H) groups
 At 1.5 times of:
  All C(H,H,H) groups
2. Uiso/Uaniso restraints and constraints
Uanis(F4) = Uanis(F4B)
Uanis(F2) = Uanis(F2B)
3. Others
 Sof(F1B)=Sof(F2B)=Sof(F3B)=Sof(F4B)=1-FVAR(1)
 Sof(F1)=Sof(F2)=Sof(F3)=Sof(F4)=FVAR(1)
4.a Secondary CH2 refined with riding coordinates:
 C4(H4A,H4B), C1S(H1SA,H1SB), C2S(H2SA,H2SB), C3S(H3SA,H3SB), C4S(H4SA,H4SB),
 C5S(H5SA,H5SB), C6S(H6SA,H6SB)
4.b Aromatic/amide H refined with riding coordinates:
 N3(H3), C3(H3A), C6(H6), C7(H7), C8(H8), C9(H9)
4.c Idealised Me refined as rotating group:
 C11(H11A,H11B,H11C), C12(H12A,H12B,H12C), C13(H13A,H13B,H13C), C19(H19A,H19B,
 H19C), C20(H20A,H20B,H20C), C21(H21A,H21B,H21C), C22(H22A,H22B,H22C), C23(H23A,
 H23B,H23C)
;
_atom_sites_solution_hydrogens    geom
_atom_sites_solution_primary      direct
_atom_sites_solution_secondary    ?
loop_
  _atom_site_label
  _atom_site_type_symbol
  _atom_site_fract_x
  _atom_site_fract_y
  _atom_site_fract_z
  _atom_site_U_iso_or_equiv
  _atom_site_adp_type
  _atom_site_occupancy
  _atom_site_site_symmetry_order
  _atom_site_calc_flag
  _atom_site_refinement_flags_posn
  _atom_site_refinement_flags_adp
  _atom_site_refinement_flags_occupancy
  _atom_site_disorder_assembly
  _atom_site_disorder_group
 Ir1 Ir 0.53833(2) 0.24355(2) 0.36214(2) 0.01359(4) Uani 1 1 d . . . . .
 Cl1 Cl 0.64529(7) 0.24069(4) 0.28953(4) 0.0202(2) Uani 1 1 d . . . . .
 P1 P 0.01847(9) 0.12167(5) 0.43657(5) 0.0264(3) Uani 1 1 d . . . . .
 F1 F -0.0054(4) 0.0520(2) 0.4681(2) 0.0473(14) Uani 0.740(5) 1 d . . . A 1
 F2 F -0.0555(3) 0.0879(3) 0.39604(16) 0.0485(12) Uani 0.740(5) 1 d . . . A 1
 F3 F 0.0490(5) 0.1860(2) 0.4062(2) 0.0362(13) Uani 0.740(5) 1 d . . . A 1
 F4 F 0.0996(4) 0.1481(2) 0.47911(17) 0.0416(11) Uani 0.740(5) 1 d . . . A 1
 F1B F -0.0571(11) 0.0592(6) 0.4430(7) 0.048(5) Uani 0.260(5) 1 d . . . A 2
 F2B F -0.0582(9) 0.1399(7) 0.3864(4) 0.0485(12) Uani 0.260(5) 1 d . . . A 2
 F3B F 0.0707(13) 0.2025(7) 0.4259(6) 0.033(4) Uani 0.260(5) 1 d . . . A 2
 F4B F 0.0759(12) 0.1194(7) 0.4810(6) 0.0416(11) Uani 0.260(5) 1 d . . . A 2
 F5 F 0.1225(2) 0.08206(12) 0.41221(10) 0.0428(7) Uani 1 1 d . . . . .
 F6 F -0.0855(2) 0.16140(13) 0.46062(10) 0.0444(8) Uani 1 1 d . . . . .
 N1 N 0.6644(2) 0.30986(13) 0.38868(12) 0.0161(7) Uani 1 1 d . . . . .
 N2 N 0.4670(2) 0.39180(13) 0.36539(12) 0.0146(7) Uani 1 1 d . . . . .
 N3 N 0.4014(2) 0.34729(13) 0.30167(12) 0.0158(7) Uani 1 1 d . . . . .
 H3 H 0.3860 0.3174 0.2789 0.019 Uiso 1 1 calc R . . . .
 C1 C 0.4642(3) 0.33208(16) 0.34002(14) 0.0148(8) Uani 1 1 d . . . . .
 C2 C 0.3635(3) 0.41618(17) 0.30229(15) 0.0154(8) Uani 1 1 d . . . . .
 C3 C 0.4055(3) 0.44357(17) 0.34228(15) 0.0188(9) Uani 1 1 d . . . . .
 H3A H 0.3951 0.4900 0.3530 0.023 Uiso 1 1 calc R . . . .
 C4 C 0.5235(3) 0.39728(17) 0.41059(15) 0.0179(9) Uani 1 1 d . . . . .
 H4A H 0.4818 0.3696 0.4344 0.021 Uiso 1 1 calc R . . . .
 H4B H 0.5223 0.4465 0.4210 0.021 Uiso 1 1 calc R . . . .
 C5 C 0.6433(3) 0.37242(16) 0.40913(15) 0.0181(9) Uani 1 1 d . . . . .
 C6 C 0.7278(3) 0.41162(18) 0.42928(15) 0.0220(9) Uani 1 1 d . . . . .
 H6 H 0.7114 0.4557 0.4429 0.026 Uiso 1 1 calc R . . . .
 C7 C 0.8365(3) 0.38631(19) 0.42952(16) 0.0264(10) Uani 1 1 d . . . . .
 H7 H 0.8951 0.4121 0.4441 0.032 Uiso 1 1 calc R . . . .
 C8 C 0.8585(3) 0.32308(19) 0.40831(16) 0.0275(11) Uani 1 1 d . . . . .
 H8 H 0.9326 0.3050 0.4077 0.033 Uiso 1 1 calc R . . . .
 C9 C 0.7716(3) 0.28670(18) 0.38811(15) 0.0226(10) Uani 1 1 d . . . . .
 H9 H 0.7873 0.2435 0.3731 0.027 Uiso 1 1 calc R . . . .
 C10 C 0.2860(3) 0.44608(17) 0.26570(15) 0.0193(9) Uani 1 1 d . . . . .
 C11 C 0.3348(3) 0.4389(2) 0.21624(15) 0.0295(11) Uani 1 1 d . . . . .
 H11A H 0.4057 0.4646 0.2144 0.044 Uiso 1 1 calc GR . . . .
 H11B H 0.2819 0.4579 0.1930 0.044 Uiso 1 1 calc GR . . . .
 H11C H 0.3483 0.3896 0.2093 0.044 Uiso 1 1 calc GR . . . .
 C12 C 0.1726(3) 0.4077(2) 0.26822(18) 0.0363(12) Uani 1 1 d . . . . .
 H12A H 0.1836 0.3585 0.2604 0.055 Uiso 1 1 calc GR . . . .
 H12B H 0.1202 0.4286 0.2456 0.055 Uiso 1 1 calc GR . . . .
 H12C H 0.1419 0.4117 0.3003 0.055 Uiso 1 1 calc GR . . . .
 C13 C 0.2696(4) 0.52344(18) 0.27681(16) 0.0302(11) Uani 1 1 d . . . . .
 H13A H 0.2369 0.5285 0.3085 0.045 Uiso 1 1 calc GR . . . .
 H13B H 0.2191 0.5441 0.2533 0.045 Uiso 1 1 calc GR . . . .
 H13C H 0.3422 0.5472 0.2758 0.045 Uiso 1 1 calc GR . . . .
 C14 C 0.4144(3) 0.20752(16) 0.41259(15) 0.0166(9) Uani 1 1 d . . . . .
 C15 C 0.5229(3) 0.18281(16) 0.42755(14) 0.0151(8) Uani 1 1 d . . . . .
 C16 C 0.5673(3) 0.13826(16) 0.39141(15) 0.0176(9) Uani 1 1 d . . . . .
 C17 C 0.4862(3) 0.13503(16) 0.35386(15) 0.0178(9) Uani 1 1 d . . . . .
 C18 C 0.3914(3) 0.17771(16) 0.36656(15) 0.0165(8) Uani 1 1 d . . . . .
 C19 C 0.3321(3) 0.24790(18) 0.44161(16) 0.0279(10) Uani 1 1 d . . . . .
 H19A H 0.2777 0.2159 0.4558 0.042 Uiso 1 1 calc GR . . . .
 H19B H 0.2928 0.2813 0.4213 0.042 Uiso 1 1 calc GR . . . .
 H19C H 0.3720 0.2730 0.4667 0.042 Uiso 1 1 calc GR . . . .
 C20 C 0.5775(3) 0.1991(2) 0.47334(16) 0.0285(10) Uani 1 1 d . . . . .
 H20A H 0.5623 0.1616 0.4960 0.043 Uiso 1 1 calc GR . . . .
 H20B H 0.5478 0.2430 0.4857 0.043 Uiso 1 1 calc GR . . . .
 H20C H 0.6586 0.2033 0.4686 0.043 Uiso 1 1 calc GR . . . .
 C21 C 0.6751(3) 0.09760(18) 0.39355(17) 0.0291(11) Uani 1 1 d . . . . .
 H21A H 0.7284 0.1217 0.4143 0.044 Uiso 1 1 calc GR . . . .
 H21B H 0.7070 0.0937 0.3616 0.044 Uiso 1 1 calc GR . . . .
 H21C H 0.6602 0.0510 0.4061 0.044 Uiso 1 1 calc GR . . . .
 C22 C 0.4993(3) 0.09388(19) 0.30976(16) 0.0281(11) Uani 1 1 d . . . . .
 H22A H 0.4791 0.0453 0.3159 0.042 Uiso 1 1 calc GR . . . .
 H22B H 0.5774 0.0963 0.2991 0.042 Uiso 1 1 calc GR . . . .
 H22C H 0.4501 0.1129 0.2851 0.042 Uiso 1 1 calc GR . . . .
 C23 C 0.2845(3) 0.18616(19) 0.33877(16) 0.0253(10) Uani 1 1 d . . . . .
 H23A H 0.2997 0.1787 0.3050 0.038 Uiso 1 1 calc GR . . . .
 H23B H 0.2550 0.2333 0.3435 0.038 Uiso 1 1 calc GR . . . .
 H23C H 0.2292 0.1520 0.3497 0.038 Uiso 1 1 calc GR . . . .
 O1S O 0.1559(2) 0.48205(13) 0.49350(11) 0.0289(7) Uani 1 1 d . . . . .
 O2S O 0.0000 0.1183(3) 0.2500 0.076(2) Uani 1 2 d S T P . .
 C1S C 0.1130(4) 0.5286(2) 0.45806(16) 0.0306(11) Uani 1 1 d . . . . .
 H1SA H 0.1581 0.5718 0.4571 0.037 Uiso 1 1 calc R . . . .
 H1SB H 0.0342 0.5409 0.4651 0.037 Uiso 1 1 calc R . . . .
 C2S C 0.1206(3) 0.4905(2) 0.41080(17) 0.0309(11) Uani 1 1 d . . . . .
 H2SA H 0.1642 0.5179 0.3875 0.037 Uiso 1 1 calc R . . . .
 H2SB H 0.0451 0.4812 0.3977 0.037 Uiso 1 1 calc R . . . .
 C3S C 0.1811(3) 0.4222(2) 0.42327(17) 0.0310(11) Uani 1 1 d . . . . .
 H3SA H 0.1273 0.3835 0.4274 0.037 Uiso 1 1 calc R . . . .
 H3SB H 0.2366 0.4094 0.3987 0.037 Uiso 1 1 calc R . . . .
 C4S C 0.2377(3) 0.44046(19) 0.46939(16) 0.0268(10) Uani 1 1 d . . . . .
 H4SA H 0.2558 0.3980 0.4878 0.032 Uiso 1 1 calc R . . . .
 H4SB H 0.3074 0.4671 0.4638 0.032 Uiso 1 1 calc R . . . .
 C5S C 0.0484(5) 0.1616(3) 0.2152(2) 0.0653(18) Uani 1 1 d . . . . .
 H5SA H 0.0245 0.1462 0.1833 0.078 Uiso 1 1 calc R . . . .
 H5SB H 0.1311 0.1585 0.2169 0.078 Uiso 1 1 calc R . . . .
 C6S C 0.0125(5) 0.2344(3) 0.2232(2) 0.0629(18) Uani 1 1 d . . . . .
 H6SA H -0.0552 0.2458 0.2045 0.076 Uiso 1 1 calc R . . . .
 H6SB H 0.0730 0.2677 0.2152 0.076 Uiso 1 1 calc R . . . .

loop_
  _atom_site_aniso_label
  _atom_site_aniso_U_11
  _atom_site_aniso_U_22
  _atom_site_aniso_U_33
  _atom_site_aniso_U_23
  _atom_site_aniso_U_13
  _atom_site_aniso_U_12
 Ir1 0.01341(6) 0.01283(6) 0.01454(10) 0.00086(6) -0.00026(6) 0.00012(5)
 Cl1 0.0224(4) 0.0206(4) 0.0178(6) 0.0032(4) 0.0050(4) 0.0024(3)
 P1 0.0278(6) 0.0295(5) 0.0218(8) -0.0072(5) 0.0059(5) -0.0066(4)
 F1 0.070(4) 0.0285(19) 0.043(4) 0.004(2) 0.023(3) -0.008(2)
 F2 0.0342(18) 0.075(3) 0.037(3) -0.024(3) -0.0095(18) -0.003(2)
 F3 0.049(3) 0.029(3) 0.030(4) 0.011(2) 0.019(3) 0.011(2)
 F4 0.048(3) 0.046(3) 0.030(2) -0.018(3) -0.0162(19) -0.009(2)
 F1B 0.045(8) 0.019(5) 0.080(16) -0.011(7) 0.028(8) -0.008(5)
 F2B 0.0342(18) 0.075(3) 0.037(3) -0.024(3) -0.0095(18) -0.003(2)
 F3B 0.040(7) 0.018(5) 0.041(13) -0.017(6) 0.018(7) -0.010(4)
 F4B 0.048(3) 0.046(3) 0.030(2) -0.018(3) -0.0162(19) -0.009(2)
 F5 0.0434(15) 0.0372(13) 0.048(2) -0.0125(13) 0.0214(15) 0.0001(11)
 F6 0.0322(14) 0.0496(15) 0.051(2) -0.0101(14) 0.0226(14) -0.0004(12)
 N1 0.0166(15) 0.0158(13) 0.016(2) 0.0024(13) -0.0016(14) -0.0043(11)
 N2 0.0154(14) 0.0164(12) 0.012(2) 0.0014(13) -0.0026(15) 0.0002(11)
 N3 0.0178(15) 0.0138(13) 0.016(2) -0.0004(13) -0.0007(14) 0.0004(11)
 C1 0.0147(16) 0.0149(14) 0.015(3) 0.0007(15) 0.0029(17) 0.0003(13)
 C2 0.0157(17) 0.0186(16) 0.012(3) 0.0017(15) 0.0018(16) 0.0040(13)
 C3 0.0191(18) 0.0172(16) 0.020(3) 0.0017(16) 0.0045(17) 0.0045(14)
 C4 0.0237(19) 0.0195(15) 0.011(3) -0.0031(16) -0.0040(17) -0.0039(14)
 C5 0.0202(18) 0.0131(15) 0.021(3) 0.0022(16) -0.0007(17) -0.0036(13)
 C6 0.028(2) 0.0186(17) 0.019(3) -0.0003(17) -0.0022(19) -0.0044(15)
 C7 0.024(2) 0.0287(19) 0.027(3) 0.0012(19) -0.0058(19) -0.0081(16)
 C8 0.0186(19) 0.0298(19) 0.034(3) 0.001(2) -0.0015(19) -0.0007(15)
 C9 0.0210(19) 0.0203(17) 0.027(3) 0.0005(18) -0.0020(18) -0.0014(14)
 C10 0.0210(18) 0.0209(17) 0.016(3) 0.0024(17) 0.0016(17) 0.0044(14)
 C11 0.037(2) 0.035(2) 0.017(3) 0.005(2) 0.000(2) 0.0146(18)
 C12 0.024(2) 0.043(2) 0.042(4) 0.009(2) -0.008(2) -0.0001(18)
 C13 0.041(3) 0.0258(19) 0.024(3) 0.0027(19) 0.000(2) 0.0174(17)
 C14 0.0234(18) 0.0148(15) 0.012(3) -0.0001(16) 0.0063(17) -0.0007(13)
 C15 0.0237(19) 0.0169(15) 0.005(2) 0.0019(14) -0.0001(16) -0.0057(13)
 C16 0.0180(18) 0.0148(15) 0.020(3) 0.0029(16) -0.0006(17) -0.0015(13)
 C17 0.0223(19) 0.0162(15) 0.015(3) 0.0018(16) 0.0031(17) -0.0068(13)
 C18 0.0182(17) 0.0192(15) 0.012(3) 0.0040(16) 0.0003(17) -0.0032(13)
 C19 0.029(2) 0.0224(18) 0.033(3) -0.0028(19) 0.0133(19) 0.0013(16)
 C20 0.033(2) 0.031(2) 0.021(3) 0.003(2) -0.006(2) -0.0051(17)
 C21 0.028(2) 0.0206(18) 0.038(3) 0.0060(19) 0.002(2) 0.0060(16)
 C22 0.034(2) 0.0280(19) 0.022(3) -0.0081(19) 0.009(2) -0.0127(16)
 C23 0.0172(19) 0.0300(19) 0.029(3) 0.0062(19) -0.0039(19) -0.0053(15)
 O1S 0.0326(15) 0.0302(14) 0.024(2) 0.0026(13) -0.0043(15) 0.0064(12)
 O2S 0.049(3) 0.046(3) 0.134(7) 0.000 0.035(4) 0.000
 C1S 0.033(2) 0.030(2) 0.029(3) 0.012(2) 0.000(2) 0.0080(17)
 C2S 0.030(2) 0.037(2) 0.025(3) 0.010(2) 0.000(2) 0.0046(18)
 C3S 0.033(2) 0.032(2) 0.028(3) 0.005(2) 0.009(2) 0.0066(17)
 C4S 0.022(2) 0.030(2) 0.028(3) 0.009(2) 0.000(2) 0.0045(16)
 C5S 0.070(4) 0.074(4) 0.052(5) 0.000(3) 0.005(4) -0.010(3)
 C6S 0.057(3) 0.063(3) 0.069(5) 0.010(3) -0.006(4) -0.010(3)

_geom_special_details
;
 All esds (except the esd in the dihedral angle between two l.s. planes)
 are estimated using the full covariance matrix.  The cell esds are taken
 into account individually in the estimation of esds in distances, angles
 and torsion angles; correlations between esds in cell parameters are only
 used when they are defined by crystal symmetry.  An approximate (isotropic)
 treatment of cell esds is used for estimating esds involving l.s. planes.
;
loop_
  _geom_bond_atom_site_label_1
  _geom_bond_atom_site_label_2
  _geom_bond_distance
  _geom_bond_site_symmetry_2
  _geom_bond_publ_flag
 Ir1 Cl1 2.4143(10) . ?
 Ir1 N1 2.108(3) . ?
 Ir1 C1 2.016(3) . ?
 Ir1 C14 2.166(4) . ?
 Ir1 C15 2.191(4) . ?
 Ir1 C16 2.212(3) . ?
 Ir1 C17 2.188(3) . ?
 Ir1 C18 2.164(3) . ?
 P1 F1 1.632(5) . ?
 P1 F2 1.583(4) . ?
 P1 F3 1.547(6) . ?
 P1 F4 1.624(4) . ?
 P1 F1B 1.512(11) . ?
 P1 F2B 1.720(12) . ?
 P1 F3B 1.699(14) . ?
 P1 F4B 1.429(15) . ?
 P1 F5 1.609(3) . ?
 P1 F6 1.607(3) . ?
 N1 C5 1.357(4) . ?
 N1 C9 1.354(4) . ?
 N2 C1 1.353(4) . ?
 N2 C3 1.397(4) . ?
 N2 C4 1.446(5) . ?
 N3 H3 0.8800 . ?
 N3 C1 1.348(5) . ?
 N3 C2 1.398(4) . ?
 C2 C3 1.342(5) . ?
 C2 C10 1.500(5) . ?
 C3 H3A 0.9500 . ?
 C4 H4A 0.9900 . ?
 C4 H4B 0.9900 . ?
 C4 C5 1.508(5) . ?
 C5 C6 1.380(5) . ?
 C6 H6 0.9500 . ?
 C6 C7 1.385(5) . ?
 C7 H7 0.9500 . ?
 C7 C8 1.379(5) . ?
 C8 H8 0.9500 . ?
 C8 C9 1.374(5) . ?
 C9 H9 0.9500 . ?
 C10 C11 1.518(6) . ?
 C10 C12 1.542(5) . ?
 C10 C13 1.531(5) . ?
 C11 H11A 0.9800 . ?
 C11 H11B 0.9800 . ?
 C11 H11C 0.9800 . ?
 C12 H12A 0.9800 . ?
 C12 H12B 0.9800 . ?
 C12 H12C 0.9800 . ?
 C13 H13A 0.9800 . ?
 C13 H13B 0.9800 . ?
 C13 H13C 0.9800 . ?
 C14 C15 1.442(5) . ?
 C14 C18 1.446(5) . ?
 C14 C19 1.495(5) . ?
 C15 C16 1.433(5) . ?
 C15 C20 1.480(5) . ?
 C16 C17 1.435(5) . ?
 C16 C21 1.506(5) . ?
 C17 C18 1.442(5) . ?
 C17 C22 1.482(5) . ?
 C18 C23 1.506(5) . ?
 C19 H19A 0.9800 . ?
 C19 H19B 0.9800 . ?
 C19 H19C 0.9800 . ?
 C20 H20A 0.9800 . ?
 C20 H20B 0.9800 . ?
 C20 H20C 0.9800 . ?
 C21 H21A 0.9800 . ?
 C21 H21B 0.9800 . ?
 C21 H21C 0.9800 . ?
 C22 H22A 0.9800 . ?
 C22 H22B 0.9800 . ?
 C22 H22C 0.9800 . ?
 C23 H23A 0.9800 . ?
 C23 H23B 0.9800 . ?
 C23 H23C 0.9800 . ?
 O1S C1S 1.435(4) . ?
 O1S C4S 1.432(4) . ?
 O2S C5S 1.410(6) 3 ?
 O2S C5S 1.410(6) . ?
 C1S H1SA 0.9900 . ?
 C1S H1SB 0.9900 . ?
 C1S C2S 1.523(6) . ?
 C2S H2SA 0.9900 . ?
 C2S H2SB 0.9900 . ?
 C2S C3S 1.538(5) . ?
 C3S H3SA 0.9900 . ?
 C3S H3SB 0.9900 . ?
 C3S C4S 1.507(6) . ?
 C4S H4SA 0.9900 . ?
 C4S H4SB 0.9900 . ?
 C5S H5SA 0.9900 . ?
 C5S H5SB 0.9900 . ?
 C5S C6S 1.479(7) . ?
 C6S C6S 1.543(12) 3 ?
 C6S H6SA 0.9900 . ?
 C6S H6SB 0.9900 . ?

loop_
  _geom_angle_atom_site_label_1
  _geom_angle_atom_site_label_2
  _geom_angle_atom_site_label_3
  _geom_angle
  _geom_angle_site_symmetry_1
  _geom_angle_site_symmetry_3
  _geom_angle_publ_flag
 N1 Ir1 Cl1 86.46(9) . . ?
 N1 Ir1 C14 116.52(14) . . ?
 N1 Ir1 C15 94.73(12) . . ?
 N1 Ir1 C16 107.98(12) . . ?
 N1 Ir1 C17 144.71(12) . . ?
 N1 Ir1 C18 155.50(14) . . ?
 C1 Ir1 Cl1 89.32(11) . . ?
 C1 Ir1 N1 85.01(12) . . ?
 C1 Ir1 C14 100.00(13) . . ?
 C1 Ir1 C15 132.31(14) . . ?
 C1 Ir1 C16 162.85(13) . . ?
 C1 Ir1 C17 130.26(14) . . ?
 C1 Ir1 C18 98.96(13) . . ?
 C14 Ir1 Cl1 155.67(10) . . ?
 C14 Ir1 C15 38.64(13) . . ?
 C14 Ir1 C16 64.47(13) . . ?
 C14 Ir1 C17 64.65(13) . . ?
 C15 Ir1 Cl1 138.34(9) . . ?
 C15 Ir1 C16 37.98(13) . . ?
 C16 Ir1 Cl1 102.33(11) . . ?
 C17 Ir1 Cl1 92.16(11) . . ?
 C17 Ir1 C15 63.82(14) . . ?
 C17 Ir1 C16 38.08(13) . . ?
 C18 Ir1 Cl1 117.60(11) . . ?
 C18 Ir1 C14 39.00(14) . . ?
 C18 Ir1 C15 64.68(14) . . ?
 C18 Ir1 C16 64.56(12) . . ?
 C18 Ir1 C17 38.69(12) . . ?
 F2 P1 F1 87.8(2) . . ?
 F2 P1 F4 174.0(2) . . ?
 F2 P1 F5 85.84(18) . . ?
 F2 P1 F6 93.98(18) . . ?
 F3 P1 F1 176.3(3) . . ?
 F3 P1 F2 93.4(3) . . ?
 F3 P1 F4 91.1(2) . . ?
 F3 P1 F5 87.7(2) . . ?
 F3 P1 F6 92.1(2) . . ?
 F4 P1 F1 87.5(2) . . ?
 F1B P1 F2B 86.8(7) . . ?
 F1B P1 F3B 164.8(8) . . ?
 F1B P1 F5 97.8(5) . . ?
 F1B P1 F6 82.3(5) . . ?
 F3B P1 F2B 82.2(7) . . ?
 F4B P1 F1B 98.9(8) . . ?
 F4B P1 F2B 169.2(7) . . ?
 F4B P1 F3B 90.4(7) . . ?
 F4B P1 F5 89.5(6) . . ?
 F4B P1 F6 90.8(6) . . ?
 F5 P1 F1 88.9(2) . . ?
 F5 P1 F4 90.2(2) . . ?
 F5 P1 F2B 98.9(4) . . ?
 F5 P1 F3B 94.2(5) . . ?
 F6 P1 F1 91.4(2) . . ?
 F6 P1 F4 90.0(2) . . ?
 F6 P1 F2B 80.8(4) . . ?
 F6 P1 F3B 85.6(5) . . ?
 F6 P1 F5 179.70(19) . . ?
 C5 N1 Ir1 123.7(2) . . ?
 C9 N1 Ir1 118.1(2) . . ?
 C9 N1 C5 118.1(3) . . ?
 C1 N2 C3 110.1(3) . . ?
 C1 N2 C4 122.7(3) . . ?
 C3 N2 C4 127.2(3) . . ?
 C1 N3 H3 124.0 . . ?
 C1 N3 C2 112.0(3) . . ?
 C2 N3 H3 124.0 . . ?
 N2 C1 Ir1 122.8(3) . . ?
 N3 C1 Ir1 132.5(3) . . ?
 N3 C1 N2 104.7(3) . . ?
 N3 C2 C10 123.6(3) . . ?
 C3 C2 N3 105.1(3) . . ?
 C3 C2 C10 131.2(3) . . ?
 N2 C3 H3A 126.0 . . ?
 C2 C3 N2 108.0(3) . . ?
 C2 C3 H3A 126.0 . . ?
 N2 C4 H4A 108.9 . . ?
 N2 C4 H4B 108.9 . . ?
 N2 C4 C5 113.2(3) . . ?
 H4A C4 H4B 107.7 . . ?
 C5 C4 H4A 108.9 . . ?
 C5 C4 H4B 108.9 . . ?
 N1 C5 C4 117.9(3) . . ?
 N1 C5 C6 121.6(3) . . ?
 C6 C5 C4 120.5(3) . . ?
 C5 C6 H6 120.2 . . ?
 C5 C6 C7 119.6(3) . . ?
 C7 C6 H6 120.2 . . ?
 C6 C7 H7 120.5 . . ?
 C8 C7 C6 119.0(4) . . ?
 C8 C7 H7 120.5 . . ?
 C7 C8 H8 120.5 . . ?
 C9 C8 C7 119.0(4) . . ?
 C9 C8 H8 120.5 . . ?
 N1 C9 C8 122.7(3) . . ?
 N1 C9 H9 118.6 . . ?
 C8 C9 H9 118.6 . . ?
 C2 C10 C11 111.2(3) . . ?
 C2 C10 C12 109.0(3) . . ?
 C2 C10 C13 108.0(3) . . ?
 C11 C10 C12 109.6(4) . . ?
 C11 C10 C13 109.0(3) . . ?
 C13 C10 C12 110.0(3) . . ?
 C10 C11 H11A 109.5 . . ?
 C10 C11 H11B 109.5 . . ?
 C10 C11 H11C 109.5 . . ?
 H11A C11 H11B 109.5 . . ?
 H11A C11 H11C 109.5 . . ?
 H11B C11 H11C 109.5 . . ?
 C10 C12 H12A 109.5 . . ?
 C10 C12 H12B 109.5 . . ?
 C10 C12 H12C 109.5 . . ?
 H12A C12 H12B 109.5 . . ?
 H12A C12 H12C 109.5 . . ?
 H12B C12 H12C 109.5 . . ?
 C10 C13 H13A 109.5 . . ?
 C10 C13 H13B 109.5 . . ?
 C10 C13 H13C 109.5 . . ?
 H13A C13 H13B 109.5 . . ?
 H13A C13 H13C 109.5 . . ?
 H13B C13 H13C 109.5 . . ?
 C15 C14 Ir1 71.6(2) . . ?
 C15 C14 C18 107.6(3) . . ?
 C15 C14 C19 126.8(4) . . ?
 C18 C14 Ir1 70.4(2) . . ?
 C18 C14 C19 125.0(3) . . ?
 C19 C14 Ir1 129.9(2) . . ?
 C14 C15 Ir1 69.7(2) . . ?
 C14 C15 C20 125.5(3) . . ?
 C16 C15 Ir1 71.8(2) . . ?
 C16 C15 C14 108.7(3) . . ?
 C16 C15 C20 125.8(3) . . ?
 C20 C15 Ir1 125.8(2) . . ?
 C15 C16 Ir1 70.24(19) . . ?
 C15 C16 C17 107.6(3) . . ?
 C15 C16 C21 126.6(4) . . ?
 C17 C16 Ir1 70.05(19) . . ?
 C17 C16 C21 125.6(4) . . ?
 C21 C16 Ir1 128.5(2) . . ?
 C16 C17 Ir1 71.87(19) . . ?
 C16 C17 C18 108.7(3) . . ?
 C16 C17 C22 124.9(3) . . ?
 C18 C17 Ir1 69.78(18) . . ?
 C18 C17 C22 126.5(4) . . ?
 C22 C17 Ir1 124.6(3) . . ?
 C14 C18 Ir1 70.56(19) . . ?
 C14 C18 C23 125.8(3) . . ?
 C17 C18 Ir1 71.53(18) . . ?
 C17 C18 C14 107.5(3) . . ?
 C17 C18 C23 126.6(4) . . ?
 C23 C18 Ir1 126.3(2) . . ?
 C14 C19 H19A 109.5 . . ?
 C14 C19 H19B 109.5 . . ?
 C14 C19 H19C 109.5 . . ?
 H19A C19 H19B 109.5 . . ?
 H19A C19 H19C 109.5 . . ?
 H19B C19 H19C 109.5 . . ?
 C15 C20 H20A 109.5 . . ?
 C15 C20 H20B 109.5 . . ?
 C15 C20 H20C 109.5 . . ?
 H20A C20 H20B 109.5 . . ?
 H20A C20 H20C 109.5 . . ?
 H20B C20 H20C 109.5 . . ?
 C16 C21 H21A 109.5 . . ?
 C16 C21 H21B 109.5 . . ?
 C16 C21 H21C 109.5 . . ?
 H21A C21 H21B 109.5 . . ?
 H21A C21 H21C 109.5 . . ?
 H21B C21 H21C 109.5 . . ?
 C17 C22 H22A 109.5 . . ?
 C17 C22 H22B 109.5 . . ?
 C17 C22 H22C 109.5 . . ?
 H22A C22 H22B 109.5 . . ?
 H22A C22 H22C 109.5 . . ?
 H22B C22 H22C 109.5 . . ?
 C18 C23 H23A 109.5 . . ?
 C18 C23 H23B 109.5 . . ?
 C18 C23 H23C 109.5 . . ?
 H23A C23 H23B 109.5 . . ?
 H23A C23 H23C 109.5 . . ?
 H23B C23 H23C 109.5 . . ?
 C4S O1S C1S 105.0(3) . . ?
 C5S O2S C5S 107.6(6) . 3 ?
 O1S C1S H1SA 110.3 . . ?
 O1S C1S H1SB 110.3 . . ?
 O1S C1S C2S 106.9(3) . . ?
 H1SA C1S H1SB 108.6 . . ?
 C2S C1S H1SA 110.3 . . ?
 C2S C1S H1SB 110.3 . . ?
 C1S C2S H2SA 111.0 . . ?
 C1S C2S H2SB 111.0 . . ?
 C1S C2S C3S 103.7(3) . . ?
 H2SA C2S H2SB 109.0 . . ?
 C3S C2S H2SA 111.0 . . ?
 C3S C2S H2SB 111.0 . . ?
 C2S C3S H3SA 111.4 . . ?
 C2S C3S H3SB 111.4 . . ?
 H3SA C3S H3SB 109.2 . . ?
 C4S C3S C2S 102.1(3) . . ?
 C4S C3S H3SA 111.4 . . ?
 C4S C3S H3SB 111.4 . . ?
 O1S C4S C3S 103.6(3) . . ?
 O1S C4S H4SA 111.0 . . ?
 O1S C4S H4SB 111.0 . . ?
 C3S C4S H4SA 111.0 . . ?
 C3S C4S H4SB 111.0 . . ?
 H4SA C4S H4SB 109.0 . . ?
 O2S C5S H5SA 109.8 . . ?
 O2S C5S H5SB 109.8 . . ?
 O2S C5S C6S 109.5(5) . . ?
 H5SA C5S H5SB 108.2 . . ?
 C6S C5S H5SA 109.8 . . ?
 C6S C5S H5SB 109.8 . . ?
 C5S C6S C6S 101.8(4) . 3 ?
 C5S C6S H6SA 111.4 . . ?
 C5S C6S H6SB 111.4 . . ?
 C6S C6S H6SA 111.4 3 . ?
 C6S C6S H6SB 111.4 3 . ?
 H6SA C6S H6SB 109.3 . . ?

loop_
  _refln_index_h
  _refln_index_k
  _refln_index_l
  _refln_F_squared_meas
  _refln_F_squared_sigma
 -1 0 0 -0.18 0.18
 1 0 0 -0.67 0.16
 1 0 0 -0.63 0.17
 2 0 0 1000 36.67
 2 0 0 928.78 36.11
 2 0 0 951.95 36.76
 -2 0 0 970.02 36.72
 3 0 0 -0.08 0.32
 3 0 0 0.14 0.3
 3 0 0 0.35 0.34
 -3 0 0 0.08 0.31
 -4 0 0 67.71 3.43
 4 0 0 71.77 3.47
 4 0 0 75.2 3.52
 4 0 0 77.01 3.48
 4 0 0 82.88 3.59
 5 0 0 -0.63 0.4
 -5 0 0 -0.24 0.38
 5 0 0 0.1 0.44
 5 0 0 -0.15 0.4
 5 0 0 -0.35 0.37
 5 0 0 -0.68 0.39
 6 0 0 51.95 3.03
 6 0 0 48.94 2.87
 6 0 0 51.34 2.94
 -6 0 0 50.01 2.83
 6 0 0 52.36 2.9
 7 0 0 -0.44 0.5
 -7 0 0 -0.08 0.55
 7 0 0 0.33 0.75
 7 0 0 0.59 0.67
 7 0 0 -0.85 0.47
 8 0 0 4.23 1.15
 8 0 0 5.49 1.22
 8 0 0 4.57 1.13
 -8 0 0 4.36 1.13
 8 0 0 3.15 1.1
 9 0 0 0.28 0.73
 -9 0 0 -0.44 0.63
 9 0 0 -0.74 0.68
 9 0 0 -0.06 0.7
 9 0 0 -0.01 0.62
 10 0 0 114.79 6.33
 -10 0 0 129.01 6.37
 10 0 0 126.81 6.65
 10 0 0 117.34 6.53
 11 0 0 -1.29 0.7
 -11 0 0 1.6 0.96
 11 0 0 -0.12 0.91
 11 0 0 0.27 0.97
 12 0 0 77.65 5.12
 12 0 0 66.67 4.91
 12 0 0 85.31 5.11
 13 0 0 -0.46 1.13
 13 0 0 -0.37 1.3
 13 0 0 3.16 1.36
 14 0 0 61.68 4.87
 14 0 0 53.67 4.8
 14 0 0 71.73 5
 15 0 0 1.63 1.58
 15 0 0 0.82 1.49
 -1 1 0 89.33 3.83
 -1 -1 0 92.05 3.84
 1 -1 0 99.51 3.85
 1 -1 0 90.66 3.84
 1 1 0 98.85 3.89
 1 1 0 98.75 3.84
 1 1 0 101.19 3.92
 2 -1 0 0.09 0.23
 2 -1 0 0.08 0.21
 2 1 0 -0.04 0.22
 -2 1 0 -0.27 0.18
 2 1 0 0.03 0.25
 2 1 0 0.32 0.28
 2 -1 0 -0.24 0.23
 2 -1 0 0.17 0.24
 -2 -1 0 -0.04 0.21
 -3 1 0 82.87 3.53
 3 1 0 80.07 3.63
 3 1 0 73.29 3.58
 3 -1 0 77.71 3.51
 -3 -1 0 83.58 3.53
 3 1 0 78.05 3.54
 3 1 0 81.21 3.57
 -4 -1 0 -0.3 0.32
 4 1 0 -0.24 0.37
 4 -1 0 -0.26 0.35
 4 1 0 -0.15 0.37
 4 1 0 -0.47 0.32
 4 -1 0 0.32 0.37
 4 1 0 -0.3 0.34
 4 -1 0 0.04 0.37
 -4 1 0 -0.31 0.29
 -5 -1 0 -0.32 0.37
 5 1 0 0.79 0.48
 -5 1 0 0.14 0.36
 5 -1 0 0.37 0.47
 5 1 0 -0.33 0.4
 5 -1 0 0.68 0.49
 5 1 0 -0.16 0.44
 5 -1 0 1.64 0.55
 5 1 0 0.04 0.43
 6 -1 0 -0.72 0.41
 6 1 0 0.42 0.53
 6 1 0 -0.35 0.5
 6 -1 0 -0.42 0.48
 6 1 0 -0.52 0.41
 -6 -1 0 0.06 0.48
 6 1 0 -0.26 0.51
 6 -1 0 0.15 0.55
 -6 1 0 -0.18 0.46
 7 1 0 2.87 0.87
 7 -1 0 2.95 0.93
 -7 1 0 2.65 0.81
 7 -1 0 2.21 0.82
 7 -1 0 2.33 0.87
 7 1 0 2.18 0.85
 7 1 0 1.96 0.84
 7 -1 0 0.93 0.64
 -7 -1 0 2.73 0.83
 7 1 0 3.68 0.99
 8 -1 0 0.05 0.64
 -8 -1 0 -0.4 0.59
 8 -1 0 -0.19 0.58
 8 1 0 -0.77 0.66
 -8 1 0 0.22 0.59
 8 1 0 -0.35 0.69
 8 -1 0 0.43 0.69
 8 1 0 1.81 0.92
 8 -1 0 0.23 0.75
 9 -1 0 6.26 1.29
 -9 1 0 4.56 1.19
 9 1 0 6.53 1.34
 9 -1 0 5.93 1.33
 9 1 0 5.99 1.39
 -9 -1 0 7.18 1.34
 9 1 0 5.59 1.29
 9 -1 0 4.18 1.22
 9 -1 0 5.85 1.26
 10 -1 0 -0.71 0.71
 10 -1 0 -0.87 0.74
 -10 -1 0 0.56 0.8
 -10 1 0 -0.91 0.63
 10 1 0 -0.4 0.7
 10 -1 0 -0.97 0.6
 10 1 0 -1.12 0.73
 10 -1 0 -0.99 0.59
 10 1 0 -0.4 0.76
 11 -1 0 0.33 0.91
 11 -1 0 -0.12 0.8
 11 1 0 0.37 0.94
 -11 1 0 1.57 0.93
 11 -1 0 0.79 0.97
 11 1 0 0.17 0.92
 11 1 0 1.62 1.06
 -11 -1 0 1.43 0.93
 12 -1 0 0.67 1.04
 12 -1 0 -0.88 0.98
 12 -1 0 -1.18 0.95
 12 1 0 -0.61 1.08
 -12 1 0 0.13 0.82
 12 1 0 -0.83 0.99
 12 1 0 -1.15 0.83
 13 -1 0 0.8 1.11
 13 1 0 -0.96 1.13
 13 -1 0 -1.55 1.12
 13 -1 0 -0.26 1.15
 13 1 0 2.84 1.4
 13 1 0 1.29 1.42
 14 1 0 -0.86 1.17
 14 1 0 0.28 1.43
 14 1 0 -0.09 1.4
 14 -1 0 1.92 1.72
 14 -1 0 -0.52 1.57
 15 1 0 1.16 1.76
 15 1 0 -0.32 1.48
 15 -1 0 1.67 1.71
 15 -1 0 -0.06 1.52
 0 -2 0 642.97 24.89
 0 2 0 681.49 24.96
 0 -2 0 650.94 24.92
 0 2 0 659.34 24.67
 0 2 0 633.29 24.89
 -1 2 0 0.05 0.15
 -1 2 0 0.08 0.16
 1 2 0 0.01 0.18
 1 -2 0 0 0.16
 1 -2 0 -0.05 0.14
 1 -2 0 0.05 0.16
 -1 -2 0 -0.12 0.16
 1 2 0 0.17 0.19
 1 2 0 0.86 0.22
 2 -2 0 638.75 24.85
 -2 -2 0 646.72 24.91
 -2 2 0 658.77 24.9
 2 -2 0 602.84 24.47
 2 2 0 639.34 25.16
 2 -2 0 670.07 24.94
 2 2 0 642.46 24.71
 2 -2 0 689 24.91
 3 -2 0 -0.23 0.31
 3 -2 0 0.08 0.33
 3 2 0 0.39 0.34
 3 2 0 -0.1 0.34
 -3 -2 0 -0.14 0.28
 -3 2 0 -0.18 0.25
 3 2 0 0.18 0.36
 3 -2 0 -0.01 0.3
 3 -2 0 0.52 0.35
 4 -2 0 89.15 4.09
 4 -2 0 86.25 4.08
 4 2 0 86.77 4.18
 -4 2 0 92.89 4.08
 -4 -2 0 88.47 4.07
 4 2 0 92.45 4.24
 4 -2 0 89.8 4.04
 4 2 0 87.4 4.1
 4 -2 0 92.01 4.1
 5 -2 0 0.54 0.45
 -5 -2 0 -0.59 0.31
 5 2 0 -0.32 0.44
 5 -2 0 -0.07 0.43
 -5 2 0 0 0.4
 5 -2 0 1.16 0.53
 5 2 0 -0.58 0.35
 5 2 0 0.11 0.48
 5 -2 0 0.15 0.42
 6 -2 0 0.62 0.54
 6 -2 0 2.23 0.8
 6 2 0 1.37 0.7
 6 2 0 1.43 0.73
 -6 -2 0 0.49 0.55
 6 2 0 2.51 0.79
 6 -2 0 2.24 0.74
 -6 2 0 2.69 0.73
 7 2 0 0.28 0.64
 7 2 0 0.59 0.74
 7 -2 0 0.54 0.65
 7 2 0 1.16 0.72
 7 -2 0 -0.43 0.57
 7 -2 0 -0.7 0.51
 -7 2 0 -0.8 0.41
 -7 -2 0 -0.29 0.49
 8 -2 0 51.74 3.2
 8 -2 0 40.33 2.99
 8 -2 0 43.86 3.07
 -8 -2 0 46.95 3.03
 8 2 0 45.75 3.11
 8 2 0 49.95 3.35
 8 2 0 49.94 3.31
 -8 2 0 53.07 3.14
 8 -2 0 48.48 3.15
 9 2 0 -0.3 0.65
 9 2 0 0.78 0.66
 -9 -2 0 -0.45 0.71
 -9 2 0 -0.02 0.79
 9 -2 0 0.45 0.67
 9 -2 0 -0.37 0.63
 9 -2 0 -0.16 0.7
 9 2 0 -0.43 0.68
 9 -2 0 0.61 0.78
 9 -2 0 -0.06 0.55
 -10 -2 0 127.13 6.49
 -10 2 0 137.19 6.54
 10 2 0 117.01 6.65
 10 2 0 114.03 6.44
 10 -2 0 122.03 6.62
 10 -2 0 113.71 6.49
 10 -2 0 121.93 6.49
 10 -2 0 140.22 6.7
 10 2 0 130.32 6.81
 11 -2 0 0.21 0.96
 -11 -2 0 -0.21 0.79
 11 -2 0 -0.04 0.86
 -11 2 0 0.09 0.77
 11 2 0 -0.81 0.88
 11 -2 0 -0.24 0.78
 11 2 0 -0.47 0.91
 11 2 0 -0.06 0.84
 11 -2 0 -0.11 0.75
 12 -2 0 94.92 5.81
 12 2 0 101.19 6.07
 12 -2 0 103.39 6.12
 12 -2 0 92.71 5.74
 12 -2 0 99.62 6.01
 -12 2 0 97.12 5.78
 12 2 0 95.35 6.01
 12 2 0 102.45 5.99
 13 2 0 0.33 1.3
 13 2 0 -0.93 1.05
 13 -2 0 0.09 1.11
 13 2 0 -0.34 1.02
 13 -2 0 1.1 1.18
 13 -2 0 0.58 1.23
 14 2 0 59.22 4.8
 14 2 0 52.15 4.57
 14 2 0 48.16 4.48
 14 -2 0 53.32 4.66
 14 -2 0 57.42 4.72
 15 2 0 0.06 1.74
 15 -2 0 -1.96 1.29
 15 2 0 -0.37 1.45
 15 -2 0 0.83 1.81
 0 -3 0 -0.41 0.22
 0 3 0 -0.41 0.23
 0 3 0 -0.4 0.24
 0 -3 0 -0.32 0.22
 0 3 0 0.16 0.27
 -1 -3 0 38.01 1.77
 1 3 0 38.33 1.81
 1 3 0 39.62 1.86
 -1 3 0 36.05 1.77
 1 -3 0 38.53 1.78
 -1 3 0 39.01 1.8
 1 3 0 38.12 1.84
 -1 3 0 38.67 1.77
 1 -3 0 36.94 1.76
 -2 -3 0 -0.09 0.28
 -2 3 0 -0.1 0.25
 2 -3 0 -0.11 0.27
 2 3 0 0.49 0.34
 2 -3 0 0.16 0.28
 2 -3 0 -0.22 0.29
 2 -3 0 0.1 0.28
 2 3 0 -0.03 0.32
 2 3 0 0.13 0.31
 3 -3 0 3.09 0.58
 3 3 0 2.02 0.54
 3 -3 0 1.53 0.47
 -3 3 0 2.37 0.5
 3 -3 0 2.24 0.53
 3 -3 0 2.67 0.57
 -3 -3 0 2.27 0.52
 3 3 0 2.72 0.58
 3 3 0 1.64 0.55
 4 3 0 -0.01 0.39
 -4 3 0 0.2 0.37
 4 -3 0 0.42 0.41
 4 -3 0 0.08 0.36
 4 3 0 -0.15 0.36
 4 -3 0 -0.22 0.33
 4 -3 0 0.17 0.44
 4 3 0 -0.48 0.31
 -4 -3 0 -0.22 0.35
 5 3 0 16.95 1.51
 5 -3 0 19.77 1.49
 5 -3 0 17.39 1.45
 5 -3 0 16.31 1.42
 5 -3 0 16.67 1.43
 5 3 0 17.6 1.52
 -5 3 0 18.11 1.42
 5 3 0 19.25 1.59
 -5 -3 0 17.79 1.46
 -6 -3 0 -0.15 0.49
 -6 3 0 -0.1 0.46
 6 -3 0 -0.17 0.45
 6 3 0 -0.3 0.51
 6 -3 0 -0.25 0.44
 6 -3 0 -0.2 0.46
 6 3 0 -0.51 0.53
 6 3 0 -1.09 0.48
 6 -3 0 -0.02 0.47
 7 -3 0 6.75 1.2
 7 3 0 3.66 1.01
 7 -3 0 5.41 1.07
 7 3 0 4.36 1.07
 -7 3 0 4.63 0.98
 7 3 0 4.99 1.13
 -7 -3 0 4.25 0.99
 7 -3 0 4.3 1.01
 8 3 0 -0.46 0.65
 8 -3 0 -0.19 0.66
 -8 3 0 -0.23 0.55
 8 -3 0 0.78 0.68
 8 -3 0 -1.11 0.7
 8 3 0 0.24 0.71
 -8 -3 0 -0.22 0.62
 8 3 0 -0.24 0.71
 9 -3 0 -1.16 0.67
 9 -3 0 -0.27 0.72
 -9 -3 0 0.5 0.82
 -9 3 0 -0.04 0.65
 9 -3 0 0.33 0.8
 9 3 0 0.08 0.68
 9 3 0 -0.26 0.64
 9 -3 0 0.65 0.72
 9 3 0 -0.3 0.62
 10 -3 0 0.47 0.8
 -10 -3 0 0.85 1.01
 10 -3 0 -1.08 0.64
 10 3 0 0.28 0.88
 10 3 0 -0.53 0.69
 10 -3 0 -0.63 0.88
 10 -3 0 0.44 0.77
 10 3 0 0.42 0.83
 -10 3 0 0.25 0.76
 10 -3 0 0.58 0.81
 11 -3 0 2.97 1.22
 11 -3 0 0.9 0.95
 11 3 0 2.98 1.24
 -11 3 0 3.73 1.17
 11 3 0 4.02 1.31
 11 -3 0 1.58 1.03
 11 3 0 1.61 1.08
 11 -3 0 2.18 1.26
 12 -3 0 -0.16 0.91
 -12 3 0 0.1 0.95
 12 -3 0 -0.59 1.06
 12 3 0 -0.45 1.06
 12 3 0 -0.6 1.1
 12 -3 0 -1.03 0.76
 12 3 0 -1.19 0.94
 12 -3 0 0.19 0.95
 13 3 0 -1.05 1.06
 13 3 0 -0.9 1.21
 13 3 0 0.62 1.11
 13 -3 0 0.3 1.04
 13 -3 0 -0.35 1.21
 13 -3 0 0.66 1.33
 14 -3 0 -1.45 1.25
 14 -3 0 -2.16 1.29
 14 3 0 0.87 1.52
 14 3 0 -1.62 1.28
 14 3 0 0.61 1.32
 15 -3 0 -0.18 1.53
 15 3 0 1.84 1.81
 15 -3 0 2.26 1.77
 15 3 0 1.41 1.71
 0 4 0 91.17 3.93
 0 4 0 97.31 3.98
 0 -4 0 89.39 3.91
 0 -4 0 92.95 3.9
 0 4 0 95.33 3.93
 1 -4 0 -0.16 0.27
 1 4 0 -0.28 0.32
 1 4 0 -1.1 0.24
 -1 4 0 -0.39 0.26
 -1 4 0 0.25 0.31
 -1 -4 0 0.28 0.3
 1 4 0 -0.18 0.29
 1 -4 0 -0.38 0.26
 -1 4 0 -0.05 0.29
 2 4 0 32.27 1.76
 2 -4 0 31.97 1.65
 2 -4 0 30.77 1.6
 2 4 0 30.86 1.73
 2 -4 0 30.87 1.66
 2 4 0 34.45 1.8
 -2 -4 0 30.14 1.66
 2 -4 0 29.11 1.63
 -2 4 0 26.28 1.61
 3 4 0 -0.34 0.33
 3 -4 0 0.48 0.37
 3 -4 0 0.05 0.33
 3 4 0 0.57 0.4
 3 4 0 -0.47 0.32
 -3 4 0 0.4 0.33
 3 -4 0 0.05 0.36
 3 -4 0 0.12 0.36
 -3 -4 0 -0.14 0.32
 4 4 0 32.72 2.04
 4 -4 0 32.05 1.94
 4 -4 0 35.66 2.03
 -4 4 0 34.49 1.97
 4 4 0 31.96 2.11
 4 -4 0 34.01 1.98
 4 4 0 37.96 2.18
 4 -4 0 30.07 1.93
 -4 -4 0 32.09 1.96
 -5 4 0 -0.02 0.43
 5 -4 0 0.4 0.45
 5 4 0 -0.58 0.44
 5 -4 0 0.56 0.49
 5 -4 0 0.32 0.44
 -5 -4 0 0.23 0.48
 5 4 0 0.22 0.55
 5 4 0 -0.78 0.37
 5 -4 0 0.15 0.46
 6 -4 0 0.93 0.64
 -6 4 0 2.83 0.73
 6 4 0 1.9 0.78
 6 -4 0 2.55 0.78
 6 -4 0 1.35 0.68
 6 -4 0 2.34 0.77
 6 4 0 2.63 0.85
 -6 -4 0 1.24 0.65
 6 4 0 1.47 0.77
 -7 -4 0 0.04 0.56
 7 -4 0 -0.86 0.51
 7 4 0 1.05 0.7
 7 4 0 0.18 0.69
 7 4 0 0.11 0.72
 7 -4 0 0.59 0.65
 7 -4 0 1.91 0.79
 7 -4 0 -0.48 0.58
 -7 4 0 -0.32 0.56
 8 4 0 21.24 2.06
 8 4 0 18.65 1.97
 -8 4 0 20.5 1.89
 8 -4 0 18.67 1.96
 8 4 0 24.08 2.15
 8 -4 0 22.72 2.02
 -8 -4 0 23.01 2.02
 8 -4 0 20.88 2.04
 9 4 0 -0.16 0.79
 9 4 0 -0.89 0.65
 -9 -4 0 1.06 0.87
 9 -4 0 0.41 0.75
 -9 4 0 -0.38 0.58
 9 -4 0 0.01 0.82
 9 4 0 0.34 0.71
 9 -4 0 -0.47 0.65
 10 -4 0 135.73 7.03
 10 -4 0 131.48 6.99
 10 -4 0 143.87 7.04
 10 4 0 142.87 7.39
 10 4 0 137.57 7.21
 10 -4 0 136.18 7.03
 -10 4 0 140.87 7.04
 -10 -4 0 138.48 7.06
 10 4 0 144.77 7.41
 11 -4 0 -0.1 0.8
 11 4 0 -0.02 0.9
 11 -4 0 0.21 0.82
 11 4 0 -0.94 0.83
 11 -4 0 0.08 0.91
 11 -4 0 -0.61 0.81
 11 4 0 -0.14 0.87
 -11 4 0 0.14 0.86
 12 4 0 119.27 7.04
 12 -4 0 107.04 6.62
 -12 4 0 121.74 6.62
 12 -4 0 121.91 6.72
 12 4 0 112.5 6.88
 12 4 0 116.93 6.82
 12 -4 0 124.55 6.75
 12 -4 0 119.22 6.9
 13 4 0 -0.76 1.13
 13 -4 0 0.02 1.34
 13 4 0 -0.54 1.11
 13 4 0 1.37 1.32
 13 -4 0 -0.9 1.04
 13 -4 0 -0.25 1.09
 14 -4 0 60.3 4.84
 14 -4 0 50.75 4.57
 14 4 0 53.28 4.54
 14 4 0 55.74 4.74
 14 4 0 57.53 4.99
 15 4 0 1.73 1.9
 15 -4 0 0.76 1.81
 15 4 0 0.36 1.53
 15 -4 0 -0.78 1.75
 15 4 0 0.6 1.54
 0 -5 0 0.11 0.32
 0 5 0 0.02 0.3
 0 5 0 -0.29 0.27
 0 -5 0 -0.14 0.29
 0 5 0 -0.44 0.27
 1 -5 0 237.21 9.06
 -1 -5 0 223.26 9.08
 1 5 0 231.31 9.2
 -1 5 0 228.46 9.14
 -1 5 0 220.06 9.01
 -1 5 0 225.23 9.07
 1 -5 0 231.24 9.09
 1 5 0 214.68 9.19
 -2 -5 0 0.03 0.31
 -2 5 0 0.58 0.36
 2 5 0 -0.09 0.37
 2 5 0 0.15 0.35
 2 -5 0 -0.25 0.26
 2 5 0 -0.06 0.34
 -2 5 0 -0.02 0.3
 2 -5 0 0.36 0.35
 2 -5 0 -0.17 0.31
 3 5 0 16.2 1.23
 3 -5 0 13.21 1.08
 -3 -5 0 12.79 1.17
 3 5 0 14.58 1.24
 -3 5 0 14.59 1.15
 3 5 0 14.72 1.26
 3 -5 0 14.97 1.16
 3 -5 0 13.28 1.12
 3 -5 0 14.2 1.12
 4 5 0 0.1 0.5
 4 5 0 -0.28 0.35
 4 -5 0 -0.7 0.37
 -4 -5 0 0.08 0.4
 4 -5 0 0.14 0.37
 4 -5 0 0.31 0.41
 -4 5 0 0.39 0.37
 4 5 0 -0.15 0.37
 4 -5 0 -0.37 0.36
 5 5 0 1.42 0.66
 5 5 0 1.29 0.66
 5 -5 0 1.23 0.58
 -5 -5 0 1.86 0.63
 5 5 0 1.79 0.71
 5 -5 0 0.66 0.48
 5 -5 0 0.62 0.48
 -5 5 0 1.2 0.58
 5 -5 0 1.55 0.61
 6 -5 0 -0.33 0.55
 6 5 0 -0.48 0.56
 -6 -5 0 -0.06 0.48
 6 -5 0 -0.18 0.46
 6 -5 0 -0.28 0.46
 6 5 0 -0.5 0.53
 -6 5 0 -0.22 0.5
 6 5 0 -0.65 0.53
 6 -5 0 0.32 0.55
 7 -5 0 3.09 0.89
 7 5 0 4.72 1.14
 -7 5 0 4.38 1
 7 5 0 4.03 1.16
 7 -5 0 3.53 1
 7 5 0 3.64 1
 -7 -5 0 3.58 0.91
 7 -5 0 4.08 1.05
 7 -5 0 4.03 0.95
 8 -5 0 0.72 0.8
 8 -5 0 0.18 0.74
 8 -5 0 0.03 0.63
 -8 5 0 -0.6 0.59
 8 5 0 -0.01 0.59
 8 -5 0 -0.27 0.54
 8 5 0 0.08 0.69
 8 5 0 -0.23 0.59
 -8 -5 0 -0.26 0.65
 9 -5 0 5.12 1.24
 9 5 0 3.5 1.15
 9 -5 0 5.35 1.28
 -9 5 0 3.55 1.02
 9 5 0 3.03 1.14
 9 5 0 5.72 1.36
 -9 -5 0 4.42 1.18
 9 -5 0 5.53 1.25
 10 5 0 -0.65 0.78
 10 -5 0 -3 0.96
 10 5 0 0.87 0.9
 10 -5 0 0.92 0.85
 10 5 0 0.28 0.85
 -10 5 0 -0.8 0.57
 10 -5 0 0.21 1.12
 -10 -5 0 -0.97 0.85
 11 -5 0 23.77 2.48
 -11 5 0 23.87 2.4
 11 5 0 23.16 2.66
 11 5 0 28.66 2.76
 11 5 0 26.1 2.83
 11 -5 0 25.51 2.68
 11 -5 0 29 2.65
 12 -5 0 0.67 1.18
 12 5 0 -0.67 1.03
 12 -5 0 -0.29 0.99
 12 -5 0 0.43 0.93
 12 5 0 -0.03 1.04
 12 -5 0 0.79 1
 -12 5 0 -0.69 0.97
 12 5 0 0.18 1.22
 13 -5 0 3.89 1.55
 13 5 0 1.97 1.51
 13 -5 0 3.85 1.56
 13 5 0 3.39 1.65
 13 5 0 2.82 1.68
 14 -5 0 0.09 1.33
 14 5 0 -1.92 1.33
 14 5 0 -0.13 1.35
 14 5 0 -1.44 1.12
 14 -5 0 0.09 1.23
 15 -5 0 1.46 1.83
 15 5 0 2.37 1.95
 15 5 0 0.12 1.83
 15 5 0 -1.56 1.63
 0 6 0 659.96 26.29
 0 -6 0 698.79 26.32
 0 6 0 682.85 26.08
 0 6 0 695.79 26.42
 0 -6 0 662.42 26.26
 -1 6 0 -0.31 0.27
 1 -6 0 -0.23 0.32
 -1 6 0 -0.2 0.31
 1 6 0 -0.24 0.33
 -1 -6 0 0.08 0.33
 1 6 0 0.21 0.33
 -1 6 0 -0.08 0.32
 1 -6 0 -0.13 0.29
 -1 -6 0 -0.38 0.32
 1 6 0 0.15 0.38
 -2 -6 0 148.3 6.31
 -2 6 0 153.87 6.37
 2 6 0 149.39 6.44
 2 -6 0 150.64 6.28
 2 6 0 144.56 6.43
 -2 6 0 143.41 6.27
 -2 6 0 149.14 6.27
 2 -6 0 144.59 6.27
 2 6 0 159.97 6.38
 3 -6 0 -0.51 0.32
 3 -6 0 0.29 0.42
 -3 -6 0 0.29 0.38
 -3 6 0 0.12 0.34
 3 6 0 -0.23 0.39
 3 -6 0 -0.13 0.33
 3 -6 0 -0.23 0.32
 3 6 0 0 0.41
 3 6 0 -0.09 0.39
 4 6 0 140.8 6.88
 4 6 0 156.32 6.8
 4 -6 0 151.6 6.68
 4 -6 0 147.07 6.56
 -4 -6 0 160.92 6.77
 -4 6 0 159.46 6.73
 4 -6 0 144.23 6.67
 4 -6 0 163.99 6.73
 4 6 0 167.55 6.99
 5 6 0 1.02 0.66
 5 6 0 -0.03 0.57
 5 -6 0 -0.42 0.4
 5 -6 0 -0.37 0.46
 -5 6 0 0.35 0.46
 5 -6 0 0.12 0.47
 -5 -6 0 0.14 0.53
 5 6 0 -0.15 0.51
 5 -6 0 -0.25 0.46
 6 6 0 88.19 4.62
 6 6 0 84.05 4.6
 6 -6 0 93.29 4.43
 6 -6 0 79.96 4.2
 6 6 0 84.25 4.49
 -6 -6 0 81.3 4.31
 6 -6 0 86.54 4.34
 -6 6 0 82.6 4.28
 6 -6 0 83.37 4.32
 7 -6 0 -0.34 0.58
 7 6 0 -0.16 0.67
 7 -6 0 -0.97 0.56
 -7 -6 0 -0.61 0.52
 -7 6 0 -0.42 0.61
 7 -6 0 -0.16 0.6
 7 6 0 -0.16 0.73
 7 6 0 1.32 0.78
 7 -6 0 -0.97 0.38
 8 6 0 11.17 1.78
 8 6 0 12.04 1.59
 -8 6 0 14.57 1.64
 8 -6 0 7.97 1.4
 8 -6 0 9.76 1.65
 -8 -6 0 10.46 1.56
 8 -6 0 10.11 1.59
 8 6 0 9.96 1.65
 8 -6 0 10.41 1.6
 9 6 0 1.21 0.78
 9 -6 0 -0.52 0.77
 9 6 0 -0.47 0.63
 9 -6 0 0.71 0.85
 9 -6 0 0.79 0.73
 -9 6 0 0.03 0.68
 9 6 0 0.07 0.67
 9 -6 0 -0.69 0.58
 -9 -6 0 -0.15 0.78
 10 -6 0 129.2 6.6
 -10 6 0 121.18 6.48
 10 6 0 135.11 7.04
 10 6 0 118.99 6.66
 10 -6 0 119.98 6.49
 10 6 0 131.6 6.99
 11 6 0 0.12 1.07
 11 6 0 0.11 1.06
 -11 6 0 -1.04 0.67
 11 -6 0 -0.97 0.97
 11 -6 0 0.91 0.98
 11 6 0 0.5 0.91
 -12 6 0 94.45 5.58
 12 6 0 92.33 5.95
 12 6 0 91 5.89
 12 6 0 88.11 5.66
 12 -6 0 80.2 5.34
 12 -6 0 85.99 5.49
 13 -6 0 -0.49 1.2
 13 6 0 -0.9 1.24
 13 -6 0 -0.25 1.18
 13 6 0 0.89 1.49
 13 6 0 -0.82 1.24
 14 -6 0 55.49 4.67
 14 6 0 53.86 4.83
 14 6 0 59.64 4.92
 14 -6 0 62.03 4.88
 14 6 0 55.95 4.9
 15 -6 0 0.28 1.57
 15 6 0 -0.27 1.61
 15 6 0 1.45 1.78
 15 6 0 -0.46 1.84
 0 7 0 0.3 0.38
 0 -7 0 -0.02 0.38
 0 -7 0 -0.83 0.29
 0 7 0 -0.64 0.34
 0 7 0 -0.25 0.37
 1 -7 0 50.54 2.58
 -1 -7 0 49.7 2.56
 -1 7 0 51.93 2.59
 1 7 0 51.99 2.66
 1 -7 0 54.55 2.61
 1 7 0 47.6 2.64
 -1 -7 0 50.89 2.58
 -1 7 0 51.06 2.59
 -1 7 0 51.86 2.65
 1 7 0 45.12 2.56
 2 7 0 -0.03 0.39
 2 -7 0 -0.15 0.32
 -2 7 0 0.06 0.4
 2 7 0 -0.2 0.4
 -2 -7 0 -0.28 0.35
 -2 7 0 0.02 0.34
 -2 7 0 0.12 0.37
 2 7 0 0.33 0.4
 2 -7 0 0.35 0.4
 3 -7 0 19.93 1.55
 3 7 0 23.53 1.72
 -3 7 0 21.39 1.53
 3 7 0 21.38 1.66
 3 -7 0 21.96 1.53
 3 -7 0 23.61 1.59
 -3 -7 0 23.92 1.62
 -3 7 0 21.13 1.6
 3 7 0 22.23 1.68
 3 -7 0 22.87 1.52
 -4 7 0 -0.07 0.4
 4 -7 0 -0.25 0.42
 4 -7 0 -0.57 0.36
 4 7 0 0.51 0.54
 4 -7 0 -0.72 0.44
 4 7 0 -0.2 0.49
 4 7 0 0.02 0.52
 4 -7 0 -0.56 0.43
 -4 -7 0 0.28 0.44
 -5 7 0 2.98 0.77
 5 7 0 2.04 0.85
 5 7 0 2.66 0.89
 5 -7 0 1.6 0.67
 -5 -7 0 1.87 0.65
 5 7 0 1.53 0.73
 5 -7 0 2.72 0.77
 5 -7 0 1.4 0.61
 5 -7 0 2.21 0.75
 6 -7 0 -0.71 0.49
 6 7 0 -0.71 0.6
 6 7 0 0.01 0.65
 -6 7 0 0.12 0.52
 6 -7 0 -0.5 0.56
 6 7 0 0.53 0.55
 -6 -7 0 0.26 0.59
 6 -7 0 -0.13 0.5
 6 -7 0 -0.22 0.56
 7 -7 0 3.4 1
 7 -7 0 2.76 0.88
 7 7 0 1.8 0.85
 -7 -7 0 3.06 0.97
 7 7 0 3.51 1.01
 7 7 0 4.36 1.17
 7 -7 0 2.81 0.93
 -7 7 0 3.07 0.88
 7 -7 0 3.39 0.97
 -8 -7 0 -0.48 0.67
 8 7 0 -0.09 0.67
 8 -7 0 -0.37 0.8
 8 -7 0 -0.51 0.68
 8 7 0 0.34 0.85
 8 7 0 0.14 0.58
 -8 7 0 0.73 0.61
 8 -7 0 0.46 0.81
 8 -7 0 -0.11 0.63
 9 7 0 0.9 0.82
 -9 7 0 -0.19 0.57
 9 7 0 0.6 0.8
 9 -7 0 1.52 1
 9 -7 0 0.61 0.89
 9 -7 0 2.16 0.97
 9 7 0 1.66 0.9
 10 7 0 0.29 1.02
 10 -7 0 -0.65 0.71
 10 7 0 0.45 0.93
 -10 7 0 0.09 0.66
 10 -7 0 0.22 0.81
 10 7 0 0.55 1.09
 11 -7 0 3.65 1.24
 11 7 0 3.66 1.44
 -11 7 0 1.68 0.98
 11 -7 0 2.93 1.25
 11 7 0 2.92 1.39
 11 7 0 4.26 1.6
 -12 7 0 -0.45 0.98
 12 7 0 -1.17 0.92
 12 7 0 -0.38 1.09
 12 7 0 0.07 1.09
 12 -7 0 0.05 1.04
 13 -7 0 3.09 1.63
 13 7 0 3.81 1.68
 13 7 0 1.89 1.69
 13 7 0 3.54 1.7
 13 -7 0 2.45 1.43
 14 -7 0 0.28 1.36
 14 7 0 -1.74 1.39
 14 7 0 -0.67 1.56
 14 7 0 -0.81 1.12
 15 7 0 9.81 2.59
 0 -8 0 312.23 12.42
 0 -8 0 309.98 12.38
 0 8 0 318.75 12.54
 0 8 0 300.94 12.34
 0 8 0 296.4 12.4
 -1 -8 0 -0.08 0.38
 1 8 0 0.03 0.38
 -1 8 0 0.04 0.35
 1 -8 0 -0.47 0.32
 1 8 0 -0.18 0.42
 -1 -8 0 -0.69 0.34
 1 -8 0 -0.29 0.37
 -1 8 0 0.06 0.37
 1 8 0 -0.36 0.36
 -1 8 0 -0.39 0.38
 -2 8 0 395.34 15.07
 -2 -8 0 398.04 15.17
 2 -8 0 379.24 15.11
 -2 8 0 364.53 15.09
 2 8 0 365.88 15.33
 -2 8 0 359.04 15.18
 2 -8 0 387.69 15.11
 2 8 0 376.96 15.32
 2 8 0 372.5 15.09
 3 -8 0 0.05 0.45
 -3 8 0 0.52 0.47
 3 -8 0 -0.3 0.42
 3 8 0 0.18 0.46
 3 -8 0 -0.34 0.42
 -3 8 0 -0.01 0.43
 -3 -8 0 0.84 0.52
 3 8 0 -0.09 0.44
 3 8 0 -0.09 0.38
 4 8 0 90.94 4.61
 4 -8 0 92.58 4.43
 4 8 0 93.95 4.67
 4 -8 0 90.55 4.3
 4 -8 0 92.01 4.38
 4 -8 0 87.46 4.38
 -4 8 0 88.74 4.41
 4 8 0 89.1 4.54
 -4 -8 0 95.26 4.48
 5 -8 0 0.19 0.58
 -5 8 0 -0.39 0.46
 5 -8 0 -0.2 0.54
 5 -8 0 0.04 0.52
 -5 -8 0 -0.3 0.52
 5 8 0 -0.24 0.46
 5 8 0 0.18 0.61
 5 8 0 -0.69 0.52
 5 -8 0 -0.27 0.47
 6 8 0 55.53 3.56
 6 -8 0 58.56 3.37
 6 8 0 56.21 3.45
 -6 -8 0 60.73 3.4
 -6 8 0 56.97 3.31
 6 -8 0 59.63 3.3
 6 -8 0 60.27 3.39
 6 8 0 50.7 3.45
 6 -8 0 56.97 3.32
 -7 -8 0 -0.12 0.63
 7 -8 0 0.7 0.68
 7 8 0 0.23 0.63
 7 -8 0 -0.85 0.5
 7 8 0 -0.84 0.58
 7 -8 0 0.58 0.77
 7 8 0 -0.09 0.62
 7 -8 0 -0.25 0.7
 -7 8 0 -0.76 0.55
 8 -8 0 2.9 1.03
 8 -8 0 2.26 1.02
 8 -8 0 2.34 1
 8 8 0 3.19 1.07
 8 8 0 3.36 1.12
 8 8 0 1.91 0.98
 -8 8 0 4.64 1.18
 8 -8 0 4.25 1.12
 -8 -8 0 7.74 1.46
 9 -8 0 0.64 0.83
 -9 8 0 -0.04 0.69
 9 8 0 -0.85 0.77
 9 -8 0 0.5 0.74
 9 8 0 0.44 0.93
 9 8 0 0.05 0.82
 10 8 0 90.78 5.56
 10 8 0 89.32 5.64
 -10 8 0 93.16 5.31
 10 -8 0 97.45 5.42
 10 8 0 92.64 5.72
 10 -8 0 93.57 5.28
 -11 8 0 -0.79 0.78
 11 -8 0 0.89 1.09
 11 -8 0 -0.35 0.77
 11 8 0 0.31 1.06
 11 8 0 -0.34 0.89
 11 8 0 -0.84 0.93
 -12 8 0 71.16 4.79
 12 8 0 66.25 5.1
 12 8 0 77.07 5.21
 12 -8 0 72.06 4.75
 12 8 0 65.76 5.08
 -13 8 0 -1.37 1.02
 13 8 0 -1.44 1.18
 13 8 0 -0.66 1.43
 13 -8 0 -0.24 1.12
 13 8 0 -1.37 1.06
 14 8 0 47.28 4.57
 14 8 0 55.47 4.71
 14 -8 0 41.37 3.97
 14 -8 0 46.89 4.28
 14 8 0 47.4 4.38
 15 8 0 1.18 1.9
 0 9 0 -0.31 0.34
 0 9 0 -0.38 0.42
 0 9 0 0.15 0.49
 0 -9 0 -0.32 0.35
 0 -9 0 -0.17 0.44
 -1 9 0 107.87 5.15
 -1 9 0 121.37 5.35
 1 9 0 118 5.27
 1 -9 0 113.53 5.18
 -1 9 0 110.31 5.17
 -1 -9 0 116.1 5.17
 1 9 0 113 5.2
 1 -9 0 115.87 5.18
 -1 -9 0 114.95 5.2
 -2 -9 0 0.07 0.44
 -2 9 0 0.38 0.47
 2 -9 0 0.05 0.43
 2 9 0 -0.06 0.5
 2 9 0 0.19 0.43
 -2 9 0 -0.22 0.35
 2 -9 0 0.37 0.44
 -2 9 0 0.43 0.44
 -2 -9 0 -0.38 0.4
 2 9 0 -0.64 0.4
 3 9 0 2.38 0.75
 3 9 0 3.35 0.92
 3 -9 0 3.68 0.82
 -3 9 0 3.16 0.82
 3 9 0 2.82 0.83
 -3 -9 0 2.83 0.71
 3 -9 0 2.65 0.71
 -3 9 0 3.06 0.79
 3 -9 0 3.18 0.78
 4 9 0 -0.82 0.43
 4 -9 0 -0.22 0.46
 4 -9 0 -0.77 0.37
 4 9 0 0.11 0.63
 4 9 0 -0.13 0.5
 4 -9 0 -0.32 0.41
 -4 9 0 0.22 0.52
 -4 -9 0 0.06 0.48
 4 -9 0 0.05 0.48
 -5 -9 0 1.59 0.71
 5 9 0 1.71 0.82
 5 -9 0 1.71 0.67
 5 -9 0 0.31 0.59
 5 9 0 1.26 0.74
 5 -9 0 0.72 0.61
 -5 9 0 1.79 0.78
 5 -9 0 0.23 0.6
 5 9 0 1.02 0.72
 6 9 0 0.25 0.67
 -6 -9 0 -0.02 0.67
 6 9 0 0.13 0.54
 6 -9 0 -0.2 0.61
 -6 9 0 0.29 0.63
 6 -9 0 -0.23 0.56
 6 -9 0 0.87 0.64
 6 9 0 0.27 0.57
 6 -9 0 0.42 0.68
 -7 -9 0 3.71 1.1
 7 -9 0 5.75 1.22
 7 9 0 3.75 1.06
 -7 9 0 3.01 0.9
 7 9 0 6.01 1.28
 7 -9 0 3.78 0.98
 7 -9 0 6.23 1.31
 7 -9 0 5.66 1.2
 7 9 0 4.19 1.14
 8 -9 0 0.13 0.8
 -8 9 0 0.08 0.67
 8 -9 0 1.68 0.83
 8 9 0 0.11 0.72
 8 9 0 -0.05 0.63
 8 9 0 0.77 0.83
 9 9 0 18.04 2.14
 -9 9 0 12.13 1.85
 9 9 0 23.05 2.44
 9 -9 0 11.24 1.81
 9 -9 0 15.01 2.12
 9 9 0 16.48 2.07
 10 -9 0 0.45 0.9
 -10 9 0 0.09 0.83
 10 -9 0 -0.85 0.8
 10 9 0 -0.55 0.86
 10 9 0 1.31 1.04
 10 9 0 -0.62 1.01
 11 -9 0 5.61 1.63
 11 9 0 5.92 1.65
 -11 9 0 4.64 1.43
 11 9 0 5.91 1.71
 11 9 0 5.21 1.69
 12 9 0 0.96 1.35
 12 9 0 -0.66 1.08
 -12 9 0 -1.15 0.89
 12 9 0 1.6 1.32
 12 -9 0 -0.45 0.96
 13 9 0 4.42 1.72
 -13 9 0 1.55 1.43
 13 -9 0 5.36 1.71
 13 9 0 4.72 1.9
 13 9 0 4.78 1.73
 14 9 0 0.61 1.51
 14 9 0 -0.3 1.35
 14 9 0 -0.91 1.52
 14 -9 0 -2.17 1.21
 0 -10 0 274.28 11.14
 0 -10 0 277.42 11.11
 0 10 0 260.62 11.14
 0 10 0 263.14 11.25
 1 -10 0 -0.41 0.5
 1 10 0 0.27 0.55
 -1 -10 0 0.28 0.48
 -1 10 0 0.16 0.43
 -1 10 0 -0.46 0.34
 -1 -10 0 0.34 0.58
 1 10 0 0.01 0.45
 -1 10 0 -0.51 0.44
 1 10 0 -0.32 0.47
 1 -10 0 -0.21 0.39
 -2 10 0 214.16 8.93
 2 -10 0 206.8 8.85
 2 10 0 205.78 9.11
 -2 -10 0 217.86 8.98
 -2 10 0 206.31 9.03
 -2 -10 0 195.87 8.85
 2 -10 0 204.29 8.87
 2 10 0 212.65 9.16
 -2 10 0 218.68 8.96
 2 10 0 207.53 9.01
 3 10 0 0.14 0.58
 3 10 0 0.45 0.54
 3 -10 0 0.26 0.45
 3 10 0 -0.04 0.57
 3 -10 0 0 0.46
 -3 10 0 -0.28 0.44
 -3 10 0 0.06 0.43
 -3 -10 0 0.19 0.52
 3 -10 0 0.61 0.53
 4 -10 0 38.42 2.55
 4 10 0 41.56 2.77
 -4 10 0 39.46 2.56
 4 10 0 43.02 2.76
 4 -10 0 42.11 2.58
 4 -10 0 39.55 2.47
 -4 -10 0 40.03 2.59
 4 10 0 43.78 2.78
 4 -10 0 41.97 2.61
 5 10 0 -0.74 0.45
 5 10 0 0.8 0.72
 5 10 0 0.71 0.59
 5 -10 0 0.38 0.62
 5 -10 0 0.51 0.72
 -5 -10 0 0.28 0.64
 5 -10 0 0.05 0.58
 -5 10 0 0.9 0.71
 5 -10 0 -0.35 0.58
 6 -10 0 1.05 0.82
 -6 10 0 -0.04 0.58
 6 10 0 -0.02 0.54
 6 -10 0 -0.13 0.64
 6 10 0 0.26 0.59
 -6 -10 0 -0.86 0.64
 6 -10 0 0.25 0.6
 6 -10 0 0.15 0.63
 6 10 0 0.67 0.68
 -7 10 0 -0.09 0.57
 7 10 0 0.72 0.83
 7 10 0 -0.08 0.7
 7 -10 0 0.75 0.7
 7 10 0 -0.57 0.58
 7 -10 0 -0.28 0.65
 8 10 0 10.16 1.92
 8 10 0 9.34 1.75
 8 10 0 16.31 1.96
 8 -10 0 9.3 1.68
 -8 10 0 8.21 1.49
 8 -10 0 11.41 1.72
 9 10 0 -0.43 0.82
 9 -10 0 -0.53 0.78
 9 10 0 -0.01 0.8
 -9 10 0 -0.81 0.64
 9 -10 0 0.33 0.76
 9 10 0 -0.68 0.76
 10 10 0 54.4 4.35
 10 -10 0 62.44 4.12
 10 10 0 64.88 4.57
 10 10 0 56.38 4.23
 -10 10 0 68.55 4.26
 11 10 0 0.12 1.26
 -11 10 0 0.57 0.89
 11 10 0 0.53 1.21
 11 -10 0 0.99 0.93
 11 10 0 0.35 1.17
 12 -10 0 64.43 4.73
 12 10 0 76.85 5.46
 12 10 0 61.86 5.1
 -12 10 0 76.82 4.98
 12 10 0 83.22 5.44
 13 -10 0 1.05 1.46
 13 10 0 1.12 1.52
 13 10 0 1 1.59
 13 10 0 0.34 1.61
 -13 10 0 1.28 1.13
 14 10 0 38.78 4.32
 14 -10 0 42.9 4
 14 10 0 41.39 4.38
 14 10 0 39.48 4.23
 0 -11 0 0.09 0.53
 0 -11 0 0.1 0.54
 0 11 0 0.05 0.49
 0 11 0 0.19 0.49
 0 11 0 0.3 0.48
 1 11 0 28.83 2.06
 1 -11 0 27.21 1.99
 -1 -11 0 28.78 2
 -1 11 0 29.55 2.08
 1 11 0 28.72 2.17
 -1 11 0 26.11 2.03
 -1 11 0 25.57 1.95
 1 -11 0 32.54 2.1
 1 11 0 30.31 2.11
 -1 -11 0 28.83 1.97
 -2 -11 0 0.03 0.47
 2 11 0 -0.07 0.57
 2 11 0 0.21 0.56
 -2 11 0 -0.19 0.53
 2 -11 0 -0.16 0.47
 2 -11 0 0.2 0.49
 -2 11 0 -0.79 0.38
 -2 -11 0 0.03 0.52
 -2 11 0 -0.18 0.44
 -3 11 0 26.83 2.02
 3 -11 0 30.41 2.06
 3 -11 0 23.65 1.95
 3 11 0 28.41 2.18
 -3 11 0 31.62 2.22
 3 11 0 29.62 2.25
 -3 -11 0 26.61 2.03
 3 11 0 29.64 2.22
 -4 11 0 -0.2 0.51
 -4 11 0 -0.22 0.54
 4 -11 0 0.47 0.6
 4 11 0 -0.32 0.54
 -4 -11 0 -0.09 0.58
 4 -11 0 0.47 0.68
 4 -11 0 -0.02 0.54
 4 11 0 -0.15 0.44
 4 11 0 0.36 0.61
 4 -11 0 -0.2 0.58
 5 -11 0 -0.4 0.56
 5 -11 0 -0.42 0.64
 5 11 0 0.02 0.59
 -5 11 0 0.45 0.65
 -5 -11 0 1.59 0.79
 5 11 0 -0.4 0.49
 5 -11 0 -0.16 0.54
 5 11 0 0.32 0.57
 5 -11 0 0.93 0.74
 6 11 0 0.16 0.57
 6 -11 0 0.56 0.75
 -6 11 0 0.64 0.61
 6 11 0 0.02 0.66
 6 11 0 0.37 0.61
 6 -11 0 0.52 0.66
 7 11 0 2.22 0.89
 7 11 0 2.93 1.07
 7 11 0 1.25 0.8
 -7 11 0 0.88 0.69
 7 -11 0 2.33 1.04
 7 -11 0 1.1 0.83
 8 -11 0 -0.08 0.68
 -8 11 0 -0.33 0.6
 8 -11 0 0.78 0.95
 8 11 0 1.15 0.93
 8 11 0 0.66 0.92
 8 11 0 -0.93 0.59
 9 11 0 27.82 2.69
 9 11 0 27.03 2.87
 9 -11 0 22.73 2.37
 9 -11 0 24.41 2.49
 -9 11 0 22.22 2.27
 9 11 0 22.56 2.48
 10 11 0 -1.75 0.99
 10 11 0 0.74 1.08
 -10 11 0 -0.11 0.86
 10 -11 0 -0.45 0.8
 10 11 0 0.41 0.95
 11 -11 0 46.08 3.77
 -11 11 0 51.31 3.82
 11 11 0 43.54 3.92
 11 11 0 44.32 3.99
 11 11 0 48.1 4
 12 11 0 0.57 1.38
 12 -11 0 1.39 1.21
 12 11 0 0.5 1.49
 12 11 0 0.54 1.36
 -12 11 0 -1.33 0.95
 -13 11 0 7.67 2.13
 13 -11 0 9.41 2.08
 13 11 0 10.21 2.38
 13 11 0 11.69 2.68
 13 11 0 13.7 2.72
 14 11 0 -0.02 1.81
 14 -11 0 -2.39 1.49
 0 12 0 269.5 11.99
 0 12 0 290.53 12.25
 0 12 0 287.75 12.1
 0 -12 0 311.31 12.06
 0 -12 0 280.39 12
 -1 12 0 1.13 0.68
 1 -12 0 -0.18 0.56
 1 12 0 0.05 0.56
 -1 -12 0 -0.52 0.53
 -1 -12 0 -0.31 0.51
 1 12 0 0.4 0.66
 1 12 0 -0.32 0.59
 -1 12 0 -0.07 0.53
 1 -12 0 -0.3 0.55
 -1 12 0 0.86 0.66
 -2 12 0 94.38 4.82
 2 12 0 104.93 4.96
 2 -12 0 90.77 4.67
 2 12 0 87.9 4.73
 2 12 0 89.69 4.89
 -2 12 0 96.05 4.76
 -2 12 0 94.54 4.77
 -2 -12 0 97.52 4.74
 2 -12 0 97.51 4.7
 -2 -12 0 90.34 4.68
 3 -12 0 0.64 0.59
 -3 -12 0 0.58 0.64
 3 -12 0 0.68 0.59
 -3 12 0 -0.02 0.52
 3 12 0 -0.28 0.54
 -3 12 0 0.18 0.66
 -3 -12 0 0.1 0.6
 3 12 0 0.57 0.65
 -3 12 0 -0.2 0.54
 -4 12 0 3.53 0.93
 4 12 0 2.73 0.88
 4 -12 0 2.56 0.89
 4 -12 0 3.7 0.97
 4 12 0 4.01 1.06
 4 12 0 4.87 1.11
 -4 -12 0 3.94 1.04
 4 -12 0 4.36 1.03
 -4 12 0 5.64 1.07
 4 -12 0 3.61 0.93
 -5 12 0 -0.08 0.51
 5 12 0 -0.32 0.52
 5 12 0 -0.65 0.52
 5 -12 0 -0.27 0.6
 5 12 0 0.47 0.59
 5 -12 0 0.09 0.64
 6 12 0 2.32 0.95
 6 -12 0 6.39 1.31
 6 -12 0 5.05 1.11
 6 12 0 4.87 1.3
 -6 12 0 3.92 1.04
 6 12 0 5.94 1.28
 7 12 0 -0.16 0.7
 7 12 0 -0.6 0.7
 7 12 0 0.07 0.73
 7 -12 0 0.24 0.93
 -7 12 0 -0.22 0.7
 7 -12 0 -0.29 0.64
 8 12 0 13.14 2.11
 -8 12 0 13.56 1.78
 8 12 0 11.62 1.97
 8 -12 0 14.42 1.86
 8 -12 0 13.18 1.75
 8 12 0 12.33 1.99
 9 12 0 2.05 1.05
 9 12 0 -0.39 0.97
 9 12 0 1.44 1.13
 -9 12 0 -0.19 0.79
 9 -12 0 -0.03 0.79
 10 12 0 78.33 5.44
 -10 12 0 83.98 5.14
 10 12 0 76.63 5.25
 10 -12 0 83.27 5.02
 10 12 0 79.16 5.45
 11 -12 0 -1.07 1.01
 -11 12 0 -1.18 0.9
 11 12 0 0.06 1.35
 11 12 0 -0.89 1.23
 11 12 0 1.48 1.25
 12 12 0 79.61 5.79
 12 12 0 73.98 5.46
 -12 12 0 70.96 5.02
 12 -12 0 71.51 4.97
 12 12 0 74.11 5.47
 -13 12 0 -0.75 1.38
 13 -12 0 1.39 1.53
 13 12 0 0.95 1.65
 13 12 0 -1.34 1.16
 13 12 0 -0.41 1.41
 0 13 0 1.65 0.67
 0 13 0 1.39 0.65
 0 -13 0 0.67 0.64
 0 -13 0 1.43 0.79
 0 13 0 1.86 0.75
 -1 13 0 75.11 3.94
 1 13 0 74.49 4.02
 -1 -13 0 69.95 3.86
 -1 -13 0 76.37 3.93
 -1 13 0 67.05 3.92
 1 -13 0 73.3 3.89
 -1 13 0 66.71 3.87
 1 -13 0 67.78 3.81
 1 13 0 69.72 3.99
 1 13 0 69.83 3.94
 -2 -13 0 0.38 0.63
 -2 13 0 0.13 0.57
 2 13 0 -0.11 0.59
 -2 13 0 -0.03 0.48
 2 13 0 0.27 0.62
 2 -13 0 0.67 0.7
 2 -13 0 -1.27 0.55
 -2 -13 0 -0.21 0.59
 -2 13 0 0.22 0.46
 2 13 0 -0.21 0.55
 -3 -13 0 47.78 3.01
 -3 13 0 50.63 3.05
 -3 13 0 46.91 3.03
 3 -13 0 43.52 2.86
 3 13 0 45.43 3.09
 3 13 0 44.89 3.03
 -3 13 0 44.65 2.91
 -4 13 0 0.56 0.75
 4 -13 0 0.64 0.64
 4 13 0 0.73 0.62
 4 13 0 0.19 0.6
 -4 13 0 -0.66 0.52
 4 13 0 0.12 0.65
 4 -13 0 -0.29 0.58
 5 13 0 44.2 3.22
 5 13 0 46.11 3.19
 -5 13 0 45.03 3.02
 5 13 0 49 3.34
 5 -13 0 49.79 3.15
 5 -13 0 40.85 2.93
 6 13 0 0.72 0.78
 6 13 0 -0.03 0.74
 6 13 0 0.57 0.8
 6 -13 0 0.15 0.61
 6 -13 0 -0.53 0.84
 -6 13 0 -0.61 0.54
 7 13 0 3.9 1.19
 7 13 0 2.64 1.06
 7 13 0 4.56 1.26
 7 -13 0 3.45 1.09
 7 -13 0 3.65 1.16
 -7 13 0 5.09 1.29
 8 13 0 1.47 1.1
 -8 13 0 0.36 0.79
 8 13 0 -0.42 0.82
 8 -13 0 -0.7 0.78
 8 13 0 0.01 0.71
 9 -13 0 19.62 2.18
 9 13 0 23.29 2.59
 -9 13 0 20.73 2.35
 9 13 0 18.14 2.51
 9 13 0 21.35 2.56
 -10 13 0 0.67 0.95
 10 13 0 1.14 1.18
 10 -13 0 -0.38 0.86
 10 13 0 -0.54 1
 10 13 0 -1.07 1.03
 11 -13 0 21.79 2.6
 11 13 0 23.15 3.01
 -11 13 0 23.34 2.7
 11 13 0 22.02 3.04
 11 13 0 24.81 2.95
 12 13 0 -2.34 1.23
 12 13 0 -1.7 1.2
 12 13 0 0.19 1.43
 12 -13 0 -1.62 1.13
 -12 13 0 0.24 1.12
 13 -13 0 11.54 2.51
 13 13 0 12.52 2.68
 -13 13 0 14.34 2.63
 13 13 0 10.37 2.66
 13 13 0 11.15 2.77
 0 14 0 252.87 11.27
 0 -14 0 262.89 11.28
 0 14 0 260.28 11.44
 0 14 0 269.95 11.37
 -1 14 0 -0.08 0.56
 -1 14 0 0.06 0.56
 1 14 0 0.21 0.63
 -1 -14 0 -0.55 0.58
 1 -14 0 0.5 0.66
 1 14 0 0.08 0.64
 -1 14 0 0.58 0.66
 1 14 0 0.54 0.64
 2 -14 0 140.06 6.67
 2 14 0 148.45 6.87
 2 14 0 145.8 6.98
 2 14 0 142.01 6.88
 -2 14 0 137.86 6.73
 -2 -14 0 131.35 6.66
 -2 14 0 134.55 6.71
 -2 14 0 154.96 6.99
 -3 -14 0 -1.43 0.5
 3 -14 0 -0.24 0.58
 -3 14 0 -0.43 0.47
 3 14 0 -0.71 0.46
 -3 14 0 0.93 0.73
 3 14 0 -1.27 0.55
 -3 14 0 0.2 0.59
 -4 14 0 59.1 3.57
 4 14 0 54.15 3.61
 4 -14 0 57.15 3.5
 4 14 0 56.94 3.66
 4 14 0 53.15 3.64
 -4 -14 0 54.78 3.5
 4 -14 0 63.85 3.6
 -4 14 0 55.01 3.54
 5 14 0 0.93 0.82
 5 -14 0 -0.99 0.66
 5 -14 0 0.2 0.69
 -5 14 0 0.51 0.62
 5 14 0 -0.28 0.73
 5 14 0 0.85 0.81
 6 14 0 34.37 2.93
 6 14 0 32.39 2.87
 -6 14 0 37.3 2.78
 6 14 0 31.87 2.85
 6 -14 0 33.3 2.6
 7 14 0 -0.73 0.86
 7 14 0 -0.25 0.84
 7 14 0 -0.22 0.77
 -7 14 0 -0.19 0.76
 7 -14 0 -0.01 0.78
 -8 14 0 9.37 1.66
 8 -14 0 5.14 1.43
 8 14 0 6.07 1.62
 8 14 0 6.73 1.68
 8 14 0 4.91 1.63
 -9 14 0 0.76 0.93
 9 14 0 -0.15 1.01
 9 -14 0 1.05 0.99
 9 14 0 -0.73 1.07
 9 14 0 -0.74 0.97
 10 14 0 51.11 4.43
 10 14 0 55.53 4.48
 10 -14 0 57.12 4.12
 -10 14 0 61.78 4.27
 10 14 0 56.78 4.48
 11 -14 0 0.76 1.29
 -11 14 0 -0.39 1.08
 11 14 0 0.04 1.34
 11 14 0 -0.23 1.12
 11 14 0 -0.89 1.06
 12 14 0 48.47 4.66
 12 14 0 62.11 5.07
 -12 14 0 66.29 4.87
 12 14 0 69.84 5.31
 12 -14 0 57.46 4.64
 13 14 0 0.03 1.61
 13 -14 0 1.28 1.58
 0 15 0 0.69 0.7
 0 15 0 1.03 0.66
 0 -15 0 -0.33 0.56
 0 15 0 0.96 0.7
 1 15 0 68.06 4
 -1 -15 0 68.81 3.89
 1 15 0 74.25 4.11
 1 -15 0 62.86 3.77
 1 15 0 67.01 4.08
 -1 15 0 67.64 3.96
 -1 15 0 70.79 4.11
 -1 15 0 66.44 3.99
 -2 15 0 1.03 0.72
 -2 -15 0 -0.57 0.54
 2 15 0 -0.43 0.57
 -2 15 0 -0.41 0.58
 2 15 0 -0.83 0.52
 2 -15 0 0.35 0.58
 2 15 0 -0.66 0.53
 -2 15 0 0.35 0.62
 -3 15 0 3.17 0.99
 -3 15 0 3.83 1.09
 -3 -15 0 4.92 1.14
 3 -15 0 3.62 1.01
 -3 15 0 3.41 1.01
 3 15 0 3.86 1.06
 3 15 0 3.51 1.13
 3 15 0 2.41 0.95
 4 -15 0 0.03 0.71
 4 15 0 0.97 0.75
 -4 15 0 1.77 0.89
 4 15 0 0.04 0.7
 4 15 0 -0.27 0.59
 -4 -15 0 -0.07 0.6
 -4 15 0 0.14 0.64
 5 15 0 7.59 1.48
 -5 15 0 6.07 1.34
 5 15 0 8.96 1.68
 5 15 0 5.6 1.35
 5 -15 0 7.2 1.44
 6 15 0 -0.1 0.72
 6 15 0 0.26 0.87
 -6 15 0 0.32 0.77
 6 15 0 0.61 0.79
 6 -15 0 -0.46 0.74
 7 15 0 6.02 1.59
 7 -15 0 7.07 1.53
 7 15 0 10.42 1.9
 -7 15 0 8.64 1.64
 7 15 0 10.46 1.86
 -8 15 0 0.43 0.81
 8 -15 0 0.18 1.04
 8 15 0 1.35 1.14
 8 15 0 0.92 1.11
 8 15 0 0.34 1.06
 9 15 0 15.53 2.5
 -9 15 0 14.51 2.32
 9 -15 0 13.2 2.19
 9 15 0 19.48 2.51
 9 15 0 13.48 2.41
 10 15 0 -0.1 1.12
 10 -15 0 -2.01 0.88
 10 15 0 0.67 1.29
 10 15 0 2.81 1.79
 -10 15 0 -0.82 1.14
 11 15 0 20.31 3.22
 11 -15 0 24.71 2.71
 -11 15 0 22.66 2.76
 11 15 0 16.25 2.95
 11 15 0 17.21 2.93
 -12 15 0 0.27 1.38
 12 15 0 0.94 1.65
 12 15 0 -0.39 1.55
 12 -15 0 1.7 1.74
 12 15 0 -1.18 1.54
 0 16 0 188.34 8.96
 0 16 0 202.24 9.02
 0 -16 0 192.74 8.85
 0 16 0 190.3 9.11
 1 16 0 -0.46 0.57
 -1 16 0 -0.18 0.69
 -1 16 0 1.18 0.83
 1 16 0 0.78 0.68
 1 -16 0 0.09 0.54
 1 16 0 0.88 0.72
 -1 16 0 0.43 0.62
 -1 -16 0 0.76 0.68
 -2 16 0 115.05 5.91
 -2 -16 0 107.91 5.61
 -2 16 0 99.17 5.57
 2 16 0 111.55 5.98
 2 16 0 109.05 5.79
 -2 16 0 107.08 5.76
 2 -16 0 110.73 5.64
 2 16 0 117.96 5.96
 3 16 0 -0.34 0.72
 3 -16 0 -0.54 0.61
 -3 -16 0 1.47 0.77
 -3 16 0 0.23 0.67
 -3 16 0 -0.33 0.62
 3 16 0 -0.78 0.68
 3 16 0 0.62 0.74
 -3 16 0 0.66 0.76
 -4 16 0 38.18 2.84
 4 16 0 34.32 2.9
 -4 -16 0 33.03 2.69
 4 -16 0 32.77 2.67
 4 16 0 36.55 2.96
 -4 16 0 39.86 3
 -5 -16 0 -1.09 0.73
 5 16 0 -1.05 0.75
 -5 16 0 -0.35 0.61
 5 16 0 1.28 0.98
 5 16 0 0.98 0.79
 5 -16 0 0.85 0.87
 6 16 0 22.74 2.42
 6 -16 0 19.49 2.18
 -6 16 0 21.14 2.25
 6 16 0 19.46 2.38
 6 16 0 19.71 2.32
 7 16 0 0.26 1.04
 7 16 0 0.86 1.02
 7 16 0 -0.52 0.83
 -7 16 0 -0.68 0.78
 7 -16 0 -1.36 0.79
 8 16 0 2.12 1.35
 8 -16 0 4.97 1.41
 -8 16 0 4.95 1.38
 8 16 0 0.86 1.11
 8 16 0 3.68 1.43
 9 -16 0 0.84 1.14
 9 16 0 -0.67 0.99
 9 16 0 0.35 1.25
 9 16 0 -1.9 1.14
 -9 16 0 0.58 1.05
 10 16 0 41.31 3.92
 -10 16 0 43.83 3.79
 10 -16 0 41.64 3.54
 10 16 0 37.97 3.91
 10 16 0 47.58 4.09
 11 16 0 1.01 1.44
 11 16 0 0.13 1.41
 11 16 0 0.94 1.48
 -11 16 0 0.77 1.23
 11 -16 0 -0.75 1.16
 -12 16 0 39.67 3.83
 12 -16 0 31.96 3.61
 0 17 0 1.05 0.82
 0 -17 0 1.74 0.77
 0 17 0 0.35 0.75
 0 17 0 2.75 0.94
 -1 17 0 35.63 2.82
 -1 -17 0 31.69 2.56
 1 17 0 35.55 2.81
 1 -17 0 34.44 2.67
 -1 17 0 33.8 2.65
 1 17 0 29.7 2.67
 -1 17 0 34.6 2.81
 1 17 0 35.62 2.83
 -2 17 0 0.52 0.7
 -2 -17 0 0.54 0.73
 2 17 0 -0.82 0.6
 2 17 0 0.07 0.67
 2 -17 0 -0.2 0.7
 -2 17 0 0.01 0.77
 2 17 0 -0.2 0.77
 -2 17 0 -0.04 0.7
 3 17 0 1.1 0.97
 -3 17 0 3.11 1.09
 3 17 0 1.77 0.99
 -3 -17 0 1.66 0.94
 -3 17 0 1.33 0.96
 3 -17 0 2.83 0.96
 3 17 0 3.18 1.11
 -3 17 0 1.01 0.83
 4 -17 0 0.24 0.71
 4 17 0 0.6 0.71
 -4 17 0 1.3 0.83
 4 17 0 -0.04 0.96
 -4 17 0 0.31 0.84
 -4 -17 0 1.43 0.8
 4 17 0 0.61 0.82
 5 17 0 0.3 0.93
 5 -17 0 -0.07 0.78
 -5 17 0 1.04 0.92
 5 17 0 -0.26 0.8
 5 17 0 -0.76 0.71
 -5 -17 0 -0.51 0.79
 6 -17 0 0.37 0.78
 6 17 0 1.07 1.15
 6 17 0 -0.83 0.74
 -6 -17 0 -0.02 0.8
 -6 17 0 -0.84 0.83
 6 17 0 0.18 0.95
 -7 17 0 0.37 1.05
 7 17 0 0.35 1.13
 7 -17 0 -0.52 0.71
 7 17 0 -1.61 0.78
 7 17 0 -1.23 0.96
 8 -17 0 -1.61 0.84
 8 17 0 0.47 1.17
 8 17 0 0.13 1.14
 -8 17 0 -0.39 0.92
 8 17 0 -0.62 1.02
 9 17 0 5.45 1.71
 9 17 0 5.31 1.94
 -9 17 0 9.09 1.95
 9 17 0 7.19 1.96
 9 -17 0 11.25 2.1
 10 17 0 0.77 1.46
 10 17 0 0.38 1.49
 -10 17 0 0.32 1.32
 10 17 0 -0.7 1.19
 10 -17 0 -0.6 1.25
 11 17 0 45.51 4.7
 11 17 0 44.56 4.3
 11 -17 0 47.78 4.2
 11 17 0 47.89 4.55
 -11 17 0 50.8 4.23
 12 -17 0 0.19 1.48
 0 18 0 112.07 6.18
 0 -18 0 112.01 5.88
 0 18 0 111.73 6.05
 0 18 0 109.92 6.02
 -1 18 0 -0.56 0.7
 1 -18 0 0.29 0.74
 1 18 0 1.28 0.9
 -1 18 0 -1.31 0.59
 1 18 0 0.16 0.73
 -1 -18 0 0.25 0.76
 1 18 0 -0.33 0.8
 -1 18 0 -0.71 0.65
 2 -18 0 34.23 2.77
 -2 18 0 37.97 3.02
 2 18 0 43.71 3.2
 2 18 0 32.66 2.85
 -2 18 0 37.49 2.88
 -2 18 0 35.26 3.01
 -2 -18 0 36.77 2.85
 2 18 0 37.38 3.02
 -3 18 0 0.71 0.81
 -3 -18 0 -0.16 0.72
 3 18 0 0.17 0.73
 3 18 0 0.62 0.81
 -3 18 0 -0.33 0.73
 3 -18 0 0.09 0.8
 3 18 0 -0.76 0.61
 -3 18 0 0.15 0.79
 4 -18 0 3.31 1.21
 4 18 0 2.93 1.23
 -4 18 0 5.41 1.4
 -4 18 0 6.22 1.39
 4 18 0 5.59 1.42
 4 18 0 3.97 1.3
 -4 -18 0 4.71 1.27
 -5 18 0 0.19 0.78
 5 18 0 -1.06 0.94
 5 18 0 -0.18 0.82
 -5 -18 0 0.21 0.79
 5 18 0 0.66 1.05
 5 -18 0 -1.02 0.69
 -6 -18 0 2.52 1.17
 6 18 0 4.71 1.51
 6 -18 0 2.82 1.19
 -6 18 0 1.43 1.16
 6 18 0 1.33 1.32
 6 18 0 2.31 1.37
 7 18 0 0.26 1.07
 -7 18 0 -0.04 0.97
 7 -18 0 0.28 0.97
 7 18 0 -0.09 1
 7 18 0 0.24 1.08
 -7 -18 0 -0.14 0.92
 8 18 0 5.32 1.73
 8 18 0 5.87 1.87
 8 -18 0 4.1 1.59
 -8 18 0 3.06 1.3
 8 18 0 4.09 1.59
 -9 18 0 -0.4 1.11
 9 18 0 -0.91 1.25
 9 18 0 -2.1 1.04
 9 -18 0 -0.51 1
 9 18 0 -1.07 1.12
 10 -18 0 29.23 3.22
 -10 18 0 35.42 3.42
 10 18 0 31.68 3.61
 10 18 0 27.69 3.81
 10 18 0 28.48 3.41
 -11 18 0 1.69 1.63
 11 -18 0 0.64 1.58
 0 19 0 1.9 1.1
 0 19 0 0.09 0.84
 0 19 0 1.63 1.07
 0 -19 0 0.27 0.88
 -1 19 0 103.18 5.98
 -1 19 0 108.62 6.2
 1 19 0 106.38 6.12
 1 -19 0 105.13 5.85
 -1 -19 0 108.5 5.9
 1 19 0 107.05 6.07
 -1 19 0 122.79 6.26
 1 19 0 113.81 6.28
 -2 19 0 0.31 0.91
 2 -19 0 0.07 0.72
 2 19 0 -0.81 0.89
 -2 19 0 1.1 1.04
 -2 -19 0 0.24 0.84
 2 19 0 -1.56 0.72
 -2 19 0 0.5 0.79
 2 19 0 1.33 0.88
 -3 19 0 36.95 3.15
 3 -19 0 35.34 2.86
 3 19 0 32.99 2.98
 -3 19 0 32.64 2.96
 -3 -19 0 28.4 2.73
 3 19 0 36.03 3.05
 3 19 0 37.61 3.23
 -3 19 0 31.26 2.85
 -4 19 0 0.77 1.11
 4 -19 0 0.86 0.92
 -4 -19 0 -0.63 0.74
 4 19 0 -1 0.89
 -4 19 0 0.27 0.86
 4 19 0 0.18 0.94
 4 19 0 0.13 0.98
 -5 19 0 3.73 1.25
 5 19 0 2.75 1.4
 -5 -19 0 4.33 1.32
 5 -19 0 4.85 1.33
 5 19 0 4.36 1.39
 5 19 0 2.18 1.17
 6 19 0 0.42 1.3
 -6 -19 0 0.21 1.07
 -6 19 0 -0.65 0.88
 6 19 0 0.6 1.05
 6 -19 0 -0.82 0.87
 -7 -19 0 0.25 1.15
 7 19 0 -1.64 1.18
 7 -19 0 1.63 1.16
 7 19 0 -0.47 1.07
 7 19 0 0.68 1.28
 -7 19 0 0.15 1.06
 8 19 0 -0.22 1.27
 8 19 0 0.29 1.33
 8 19 0 0.38 1.22
 -8 -19 0 0.93 1.12
 -8 19 0 1.94 1.21
 8 -19 0 -0.37 1.13
 -9 19 0 12.45 2.27
 9 -19 0 7.58 1.98
 9 19 0 11.82 2.43
 9 19 0 10.29 2.39
 9 19 0 15.06 2.76
 -10 19 0 -0.4 1.39
 10 19 0 -0.47 1.33
 10 -19 0 -0.55 1.33
 0 20 0 68.23 4.57
 0 20 0 63.93 4.26
 0 20 0 60.74 4.35
 0 -20 0 62.85 4.14
 1 20 0 1.89 1.06
 1 20 0 1.31 1.11
 1 -20 0 -0.23 0.88
 -1 -20 0 0.92 1
 1 20 0 -0.45 0.92
 -1 20 0 0.2 1.01
 -1 20 0 1.02 1.05
 -1 20 0 1.67 1.11
 -2 -20 0 41.62 3.21
 2 -20 0 40.09 3.16
 2 20 0 37.28 3.24
 -2 20 0 35.72 3.11
 -2 20 0 35.54 3.21
 2 20 0 31.69 3.06
 -2 20 0 44.33 3.52
 2 20 0 36.75 3.26
 -3 -20 0 1.34 1.07
 -3 20 0 -0.48 0.91
 3 20 0 0.24 0.94
 3 20 0 0.21 0.86
 3 -20 0 0.35 0.89
 -3 20 0 0.15 0.79
 3 20 0 -0.22 0.91
 -3 20 0 0.5 0.9
 4 20 0 11.28 2.08
 4 20 0 10.4 2.08
 4 -20 0 10.61 1.93
 4 20 0 12.34 2.07
 -4 -20 0 9.94 1.82
 -4 20 0 8.17 1.91
 -4 20 0 13.13 2.1
 5 20 0 -0.25 1.09
 5 -20 0 1.03 1
 -5 20 0 -1.45 0.84
 -5 -20 0 -0.4 1.04
 5 20 0 2.44 1.33
 5 20 0 0.11 1.07
 6 20 0 2.27 1.41
 6 20 0 0.04 1.04
 -6 -20 0 0.07 1.01
 6 -20 0 -0.53 0.99
 6 20 0 0.09 1.31
 -6 20 0 1.03 1.03
 7 20 0 0.65 1.32
 -7 -20 0 0.44 1.1
 7 -20 0 -1.12 0.96
 7 20 0 -0.82 1.23
 -7 20 0 1.51 1.24
 -8 20 0 12.09 2.37
 8 20 0 12.13 2.59
 8 -20 0 10.21 2.16
 8 20 0 8.99 2.36
 -8 -20 0 13.97 2.47
 8 20 0 17.88 2.85
 -9 20 0 -2.15 1.18
 9 20 0 -0.93 1.61
 0 21 0 0.52 1
 0 21 0 0.39 1.1
 0 -21 0 -0.58 0.92
 0 21 0 0.22 1.1
 -1 21 0 89.03 5.5
 1 21 0 84.86 5.57
 -1 21 0 95.66 5.57
 -1 -21 0 90.22 5.33
 -1 21 0 92.38 5.66
 1 21 0 85.32 5.45
 1 21 0 79.87 5.4
 1 -21 0 87.82 5.31
 2 21 0 -0.65 0.98
 2 21 0 0.44 1.15
 -2 21 0 1.2 1.08
 -2 -21 0 1.64 1.2
 -2 21 0 0.21 1.01
 2 21 0 0.68 1.13
 2 -21 0 0.16 0.92
 -2 21 0 0.92 1.24
 -3 21 0 38.26 3.48
 3 21 0 33.75 3.4
 3 21 0 33.77 3.29
 3 -21 0 38.75 3.2
 -3 -21 0 41.32 3.28
 3 21 0 36.23 3.34
 -3 21 0 40.94 3.34
 4 21 0 0.92 1.57
 4 -21 0 -0.97 0.83
 -4 21 0 -0.7 0.94
 -4 -21 0 -0.15 0.97
 4 21 0 0.68 1.09
 4 21 0 0.18 1.07
 -4 21 0 0.23 1.27
 5 21 0 15.63 2.5
 5 -21 0 10.61 2
 -5 21 0 9.25 1.87
 5 21 0 10.64 2.32
 5 21 0 9.02 2.06
 -5 -21 0 13.52 2.19
 6 21 0 1.56 1.3
 6 21 0 1.56 1.59
 6 21 0 2.13 1.31
 -6 21 0 -0.31 1.15
 -7 21 0 2.15 1.37
 7 21 0 0.17 1.57
 7 21 0 1.09 1.4
 7 21 0 0.9 1.33
 8 21 0 -1.87 1.39
 -8 21 0 1.53 1.46
 0 22 0 40.26 3.42
 0 22 0 34.83 3.48
 0 22 0 37.88 3.44
 1 22 0 -0.35 1.07
 1 22 0 1.47 1.35
 -1 22 0 1.4 1.29
 -1 22 0 2.55 1.31
 -1 22 0 0.04 1.11
 1 22 0 0.06 1.05
 2 22 0 24.89 2.92
 -2 22 0 24.89 2.88
 2 22 0 21.62 2.72
 -2 22 0 24.81 2.84
 2 22 0 26.47 2.92
 -2 22 0 30.52 3.13
 -3 22 0 -0.81 1.05
 3 22 0 0.5 1.28
 -3 22 0 0.32 1.01
 3 22 0 -0.51 1.01
 3 22 0 -1.12 0.91
 4 22 0 8.12 1.88
 4 22 0 5.36 1.83
 4 22 0 6.61 1.78
 -4 22 0 4.44 1.71
 -4 22 0 5.3 1.69
 -5 22 0 0.93 1.23
 5 22 0 -0.69 1.23
 5 22 0 1.61 1.34
 5 22 0 2.43 1.5
 6 22 0 0.93 1.45
 6 22 0 -0.84 1.14
 6 22 0 -1.96 1.24
 -6 22 0 0.65 1.17
 7 22 0 -0.07 1.59
 7 22 0 -0.6 1.11
 -7 22 0 -0.55 1.25
 0 23 0 0.01 1.18
 0 23 0 -0.36 1.28
 0 23 0 0.81 1.23
 1 23 0 57.22 4.22
 1 23 0 46.36 4.03
 -1 23 0 41.48 3.91
 1 23 0 45.42 4.14
 -1 23 0 55.95 4.37
 -1 23 0 54.7 4.12
 -2 23 0 0.62 1.47
 -2 23 0 2.21 1.45
 2 23 0 2.19 1.33
 2 23 0 0.22 1.08
 2 23 0 0.08 1.36
 -2 23 0 0.22 1.08
 -3 23 0 15.65 2.51
 3 23 0 14.98 2.59
 3 23 0 16.08 2.56
 -3 23 0 15.95 2.74
 3 23 0 14.48 2.61
 4 23 0 -1.03 1.3
 -4 23 0 -0.29 1.3
 4 23 0 -0.3 1.21
 -4 23 0 0.48 1.36
 4 23 0 0.18 1.3
 5 23 0 3.25 1.55
 5 23 0 5.48 1.88
 -5 23 0 7.9 1.99
 5 23 0 3.16 1.94
 -6 23 0 0.48 1.31
 6 23 0 -0.2 1.35
 0 24 0 22.19 3.01
 0 24 0 28.72 3.12
 0 24 0 21.43 3.16
 1 24 0 1.16 1.32
 1 24 0 -0.1 1.36
 -1 24 0 1.17 1.45
 1 24 0 0.44 1.26
 -1 24 0 1.06 1.26
 -1 24 0 0.75 1.39
 2 24 0 27.69 3.18
 2 24 0 20.4 3.18
 -2 24 0 22.28 2.92
 -2 24 0 16.91 3.08
 2 24 0 25.04 3.09
 -2 24 0 23.92 2.93
 3 24 0 0.02 1.38
 3 24 0 0.63 1.34
 -3 24 0 1.06 1.36
 -3 24 0 -0.76 1.47
 3 24 0 -0.1 1.42
 -4 24 0 3.48 1.9
 4 24 0 6.46 2.14
 0 25 0 -0.64 1.5
 1 25 0 31.19 3.45
 -1 25 0 35.26 3.69
 1 0 1 -0.09 0.09
 1 0 1 0.04 0.11
 1 0 1 0 0.09
 1 0 1 0 0.08
 1 0 -1 0.07 0.11
 1 0 -1 0.1 0.11
 -1 0 -1 -0.01 0.09
 1 0 -1 -0.08 0.08
 1 0 -1 0.26 0.12
 2 0 -1 0.88 0.3
 2 0 1 0.1 0.25
 2 0 1 -0.12 0.2
 2 0 -1 0.04 0.2
 2 0 -1 -0.19 0.2
 2 0 1 -0.14 0.24
 -2 0 1 -0.17 0.16
 2 0 1 0.5 0.25
 2 0 -1 0.09 0.26
 -2 0 -1 0.07 0.21
 3 0 1 -0.29 0.26
 3 0 1 0.19 0.33
 3 0 1 0.12 0.3
 3 0 -1 0.46 0.32
 3 0 -1 0.04 0.31
 3 0 1 -0.13 0.31
 -3 0 -1 0.11 0.32
 3 0 1 0.14 0.33
 -3 0 1 0.11 0.31
 3 0 -1 0.29 0.34
 -4 0 -1 -0.08 0.34
 4 0 1 -0.63 0.3
 4 0 -1 -0.19 0.34
 4 0 1 -0.5 0.3
 4 0 -1 -0.32 0.25
 4 0 1 -0.74 0.29
 4 0 1 -0.16 0.33
 -4 0 1 0.04 0.37
 4 0 -1 -0.77 0.26
 5 0 1 0.16 0.43
 5 0 1 -0.34 0.42
 5 0 -1 0.17 0.43
 -5 0 1 0.3 0.44
 5 0 1 0.09 0.46
 5 0 -1 0.97 0.57
 -5 0 -1 0.27 0.43
 5 0 1 0.02 0.4
 5 0 -1 0.14 0.47
 6 0 -1 0 0.46
 6 0 -1 -0.14 0.49
 6 0 1 0.05 0.57
 6 0 -1 -0.27 0.43
 -6 0 1 0.3 0.41
 6 0 1 -0.73 0.41
 6 0 1 -0.13 0.48
 6 0 -1 0.04 0.53
 -6 0 -1 -0.55 0.33
 6 0 1 -0.26 0.41
 6 0 -1 0.33 0.59
 7 0 1 -1.19 0.44
 7 0 1 0.44 0.64
 7 0 -1 -0.27 0.55
 7 0 1 0.19 0.56
 7 0 -1 0.4 0.58
 -7 0 1 0.01 0.55
 7 0 1 0.09 0.6
 7 0 -1 0.36 0.59
 7 0 -1 0.75 0.66
 -7 0 -1 -0.38 0.53
 -8 0 -1 -0.17 0.69
 8 0 1 -0.29 0.69
 8 0 1 0.51 0.75
 8 0 -1 0.16 0.78
 8 0 1 -0.16 0.67
 8 0 1 -1.04 0.56
 8 0 -1 0.85 0.74
 -8 0 1 -0.7 0.58
 8 0 -1 -1.2 0.62
 8 0 -1 0.65 0.79
 9 0 -1 0.12 0.65
 9 0 -1 -0.41 0.55
 -9 0 -1 -0.01 0.74
 9 0 1 -0.36 0.64
 -9 0 1 -0.05 0.73
 9 0 1 0.28 0.81
 9 0 1 0.19 0.85
 9 0 -1 0.57 0.81
 9 0 -1 -0.77 0.55
 10 0 -1 0.85 0.8
 10 0 1 -0.23 0.76
 10 0 -1 1.44 0.92
 10 0 -1 -0.34 0.78
 10 0 1 0.16 0.89
 10 0 -1 -0.24 0.79
 -10 0 1 0.97 0.93
 -10 0 -1 0.25 0.75
 10 0 1 0.9 0.9
 11 0 1 0.29 0.81
 11 0 -1 -0.01 0.95
 -11 0 -1 -0.37 0.64
 11 0 1 0.56 1
 11 0 -1 1.33 1.09
 11 0 -1 -0.87 0.75
 -11 0 1 0.59 0.84
 11 0 1 -0.16 0.89
 12 0 1 0.7 1.17
 -12 0 -1 -0.16 0.77
 12 0 1 0.13 0.96
 12 0 -1 0.01 0.93
 12 0 -1 0.43 1.06
 12 0 -1 1.11 1.12
 12 0 1 1.15 1.09
 13 0 -1 -1.7 1.06
 13 0 -1 -0.7 1.04
 13 0 1 2.23 1.36
 13 0 1 0.33 1.21
 13 0 -1 0.3 1.22
 13 0 1 1.54 1.29
 14 0 -1 -0.63 1.23
 14 0 1 -0.39 1.31
 14 0 -1 -1.84 1.27
 14 0 -1 2.9 1.52
 14 0 1 -1.08 1.15
 15 0 -1 0.2 1.75
 15 0 1 -1.12 1.77
 15 0 -1 2.25 1.76
 15 0 1 0.49 1.62
 0 1 -1 -0.04 0.06
 0 -1 -1 -0.15 0.06
 0 1 -1 -0.05 0.06
 0 1 -1 0.01 0.07
 1 1 -1 538.51 20.47
 -1 1 1 535 20.67
 1 -1 1 509.81 20.29
 1 -1 1 544.61 20.6
 1 1 -1 533.39 20.71
 -1 -1 -1 524.47 20.68
 1 -1 1 514.43 20.64
 1 1 -1 577.97 20.85
 1 -1 1 578.54 20.68
 1 1 -1 533.7 20.61
 1 -1 -1 562.03 20.68
 1 1 1 553.97 20.88
 -1 -1 1 514.2 20.65
 1 -1 -1 562.22 20.64
 1 1 1 541.97 20.75
 1 -1 -1 523.25 20.32
 -1 1 -1 522.05 20.64
 1 1 1 579.74 20.51
 1 -1 -1 540.54 20.69
 2 1 -1 64.88 2.91
 -2 1 1 65.19 2.88
 2 1 -1 68.59 2.96
 2 -1 1 67.37 2.9
 2 1 -1 70.86 2.91
 -2 -1 -1 71.13 2.92
 2 1 -1 71.48 2.98
 2 -1 1 69.6 2.89
 2 -1 1 60.95 2.81
 2 1 -1 63.31 2.85
 2 -1 1 70.45 2.9
 2 -1 -1 65.09 2.89
 2 1 1 70.37 2.98
 2 1 1 62.94 2.94
 2 -1 -1 61.29 2.83
 2 -1 -1 69.4 2.92
 -2 1 -1 66.31 2.87
 -2 -1 1 66.06 2.87
 2 -1 -1 70.53 2.92
 3 1 -1 28.57 1.63
 3 -1 1 27.55 1.6
 3 1 -1 29.23 1.62
 3 1 -1 34.4 1.69
 -3 -1 -1 26.41 1.57
 3 -1 1 27.26 1.56
 3 1 -1 31.73 1.7
 3 -1 1 28.96 1.63
 -3 1 1 27.37 1.57
 -3 1 -1 25.84 1.54
 3 -1 -1 29.71 1.63
 3 -1 -1 29 1.59
 3 -1 -1 30.8 1.64
 -3 -1 1 28.51 1.59
 3 1 1 28.48 1.68
 3 1 1 27.71 1.65
 3 -1 -1 28.63 1.61
 3 1 1 32.49 1.73
 4 1 -1 124.78 5.66
 -4 -1 -1 130.02 5.56
 4 1 -1 132.24 5.71
 4 1 -1 125.94 5.56
 4 -1 1 130.73 5.51
 4 -1 1 122.81 5.54
 4 -1 1 132.24 5.6
 4 1 -1 124.77 5.59
 -4 1 1 139.41 5.58
 4 -1 -1 128.18 5.49
 4 -1 -1 127.29 5.58
 4 1 1 135.6 5.62
 -4 -1 1 124.31 5.52
 4 -1 -1 127.72 5.56
 4 1 1 126.19 5.71
 4 1 1 133.31 5.71
 4 -1 -1 130.57 5.61
 -4 1 -1 129.72 5.55
 -5 -1 -1 20.86 1.49
 -5 1 1 21.09 1.48
 5 -1 1 20.64 1.54
 5 1 -1 17.41 1.5
 5 -1 1 19.93 1.53
 5 1 -1 20.48 1.58
 5 1 -1 20.72 1.62
 5 -1 1 18.85 1.46
 5 1 -1 20.98 1.56
 5 -1 1 21.09 1.54
 5 1 -1 18.77 1.57
 5 -1 -1 18.79 1.44
 -5 -1 1 19.2 1.44
 5 -1 -1 19.8 1.51
 5 -1 -1 18.4 1.47
 5 1 1 18.73 1.5
 -5 1 -1 18.03 1.43
 5 1 1 19.69 1.6
 5 1 1 22.96 1.66
 6 -1 1 144.66 6.7
 6 -1 1 149.67 6.65
 -6 1 1 145.51 6.66
 6 1 -1 157.02 6.8
 -6 -1 -1 150.62 6.69
 6 1 -1 145.74 6.87
 6 -1 1 140.66 6.69
 6 1 -1 152.01 6.9
 6 1 -1 157.86 6.8
 6 -1 1 150.39 6.72
 -6 1 -1 159.23 6.74
 6 1 1 145.78 6.88
 6 1 1 148.78 6.73
 6 1 1 153.67 6.91
 6 -1 -1 151.85 6.75
 6 -1 -1 150.28 6.73
 6 -1 -1 159.71 6.69
 -6 -1 1 146.91 6.66
 7 -1 1 1.87 0.7
 7 -1 1 0.85 0.66
 7 1 -1 0.42 0.69
 7 1 -1 1.74 0.8
 7 -1 1 -0.13 0.59
 -7 -1 -1 0.62 0.58
 7 1 -1 0.75 0.69
 -7 1 1 0.57 0.63
 7 -1 1 0.11 0.67
 7 1 -1 1.57 0.77
 7 -1 1 1.27 0.7
 7 1 1 2.15 0.9
 7 -1 -1 -0.06 0.58
 7 -1 -1 1.22 0.74
 7 1 1 1.93 0.81
 7 -1 -1 0.6 0.67
 -7 1 -1 0.75 0.66
 7 1 1 0.84 0.68
 -7 -1 1 1.27 0.67
 7 -1 -1 1.5 0.8
 8 1 -1 142.79 7.09
 8 -1 1 146.23 7.24
 8 -1 1 143.35 7.21
 -8 -1 -1 147.96 7.05
 8 1 -1 149.25 7.28
 8 1 -1 153.74 7.32
 8 -1 1 155.59 7.14
 -8 1 1 154.19 7.04
 8 1 -1 148.5 7.14
 8 -1 1 154.13 7.14
 8 1 1 143.71 7.11
 8 -1 -1 161.23 7.1
 8 1 1 142.69 7.22
 8 -1 -1 153.54 7.32
 -8 -1 1 152.83 7.04
 -8 1 -1 147.82 7
 8 -1 -1 144.67 7.09
 8 1 1 144.11 7.25
 8 -1 -1 158.24 7.15
 8 -1 -1 157.44 7.17
 9 -1 1 33.3 2.75
 9 -1 1 40.75 2.91
 -9 -1 -1 39.26 2.83
 9 1 -1 35.89 2.76
 9 1 -1 36.88 2.93
 9 -1 1 33.1 2.72
 9 1 -1 36.04 2.86
 9 -1 1 37.24 2.88
 -9 1 1 35.61 2.75
 9 1 1 36.22 2.88
 9 1 1 40.31 2.91
 9 -1 -1 30.51 2.62
 -9 1 -1 41.71 2.86
 9 -1 -1 39.81 2.88
 9 -1 -1 39.34 2.82
 -9 -1 1 37.79 2.81
 9 -1 -1 33.47 2.78
 9 -1 -1 39.17 2.92
 9 1 1 37.76 2.88
 10 1 -1 39.39 3.22
 -10 -1 -1 34.33 2.8
 10 -1 1 34.44 2.9
 10 -1 1 45.88 3.17
 10 1 -1 37.09 3.02
 10 -1 1 36.77 3.07
 10 -1 1 38.43 3.15
 -10 1 1 39.07 2.99
 10 1 -1 36.67 3.07
 10 -1 -1 41.6 3.16
 10 1 1 42.71 3.23
 10 -1 -1 38.11 3.07
 10 -1 -1 45.8 3.17
 10 1 1 42.32 3.1
 -10 1 -1 30.09 2.77
 -10 -1 1 39.48 3.09
 10 -1 -1 45.65 3.22
 10 1 1 44.85 3.34
 11 -1 1 82.35 5.14
 11 1 -1 83.14 5.15
 -11 -1 -1 86.79 4.93
 11 1 -1 80.31 5.1
 11 1 -1 82.51 5.01
 -11 1 1 82.17 4.89
 11 -1 1 69.56 4.73
 11 -1 1 83.86 5.12
 11 1 1 80.66 5.17
 11 -1 -1 76.63 4.88
 -11 1 -1 78.21 4.78
 11 -1 -1 89.61 5.14
 -11 -1 1 76.47 4.76
 11 -1 -1 81.82 5.09
 11 -1 -1 85.82 5.13
 11 1 1 71.23 4.98
 11 1 1 77.11 4.88
 12 1 -1 4.08 1.51
 -12 -1 -1 4.62 1.41
 12 -1 1 2.9 1.28
 12 1 -1 4.05 1.54
 12 -1 1 4.03 1.43
 12 1 -1 4.76 1.56
 12 -1 1 6.02 1.66
 -12 1 -1 3.43 1.41
 12 1 1 5.56 1.58
 12 1 1 5.15 1.57
 12 -1 -1 4.24 1.47
 12 -1 -1 0.99 1.22
 12 -1 -1 2.1 1.32
 12 1 1 2.98 1.44
 13 -1 1 44.32 4.01
 13 -1 1 55.58 4.04
 13 1 -1 46.09 3.99
 13 1 -1 42.41 3.91
 13 -1 1 44.06 4.05
 13 1 -1 43.8 3.75
 13 1 1 45.1 3.96
 13 -1 -1 42.32 3.77
 13 1 1 56.97 4.29
 13 1 1 45.01 3.83
 13 -1 -1 41 3.94
 13 -1 -1 55.38 4.28
 14 1 -1 2.15 1.51
 14 1 -1 -0.88 1.19
 14 -1 1 0.92 1.6
 14 -1 1 0.86 1.44
 14 1 -1 3.83 1.67
 14 -1 -1 -0.08 1.32
 14 1 1 0.55 1.51
 14 1 1 1.37 1.49
 14 -1 -1 0.01 1.33
 14 -1 -1 2.32 1.71
 15 -1 1 32.36 3.88
 15 -1 1 33.96 3.98
 15 1 -1 28.28 3.66
 15 1 -1 27.71 3.71
 15 -1 -1 41.85 4.36
 15 -1 -1 38.26 3.92
 15 1 1 32.36 3.87
 15 1 1 41.1 4.26
 0 2 1 15.87 0.78
 0 -2 1 14.85 0.73
 0 2 -1 14.8 0.75
 0 2 1 15.24 0.77
 0 2 -1 15.19 0.74
 0 -2 -1 14.55 0.78
 0 2 -1 12.83 0.71
 0 2 1 14.59 0.79
 0 -2 -1 15.13 0.77
 1 2 -1 6.16 0.51
 1 -2 1 6.49 0.46
 1 2 -1 7.38 0.51
 -1 -2 -1 6.82 0.52
 1 -2 1 6.18 0.47
 1 -2 1 5.87 0.45
 -1 2 1 6.06 0.48
 1 2 -1 5.54 0.49
 1 -2 1 6.25 0.45
 -1 2 1 5.95 0.49
 -1 -2 1 5.48 0.46
 1 -2 -1 6 0.49
 -1 2 -1 6.1 0.45
 1 -2 -1 5.07 0.46
 1 2 1 6.19 0.52
 -1 2 -1 5.61 0.44
 1 2 1 5.75 0.53
 1 2 1 6.13 0.53
 2 -2 1 137.42 5.14
 2 2 -1 134.61 5.32
 -2 2 1 121.83 5.2
 -2 -2 -1 123.62 5.23
 2 -2 1 126.17 5.19
 2 2 -1 127.37 5.31
 2 -2 1 138.09 5.23
 2 2 -1 133.91 5.23
 2 -2 1 124.71 5.21
 2 -2 -1 128.15 5.24
 -2 2 -1 131.46 5.21
 2 -2 -1 133.84 5.25
 -2 -2 1 122.22 5.19
 2 2 1 122.21 5.23
 2 -2 -1 121.25 5.12
 2 -2 -1 117 5.2
 2 2 1 129.63 5.32
 3 -2 1 1.47 0.43
 -3 -2 -1 1.5 0.42
 3 -2 1 1.16 0.43
 3 -2 1 0.78 0.42
 -3 2 1 0.82 0.39
 3 -2 1 2.35 0.51
 3 2 -1 1.12 0.41
 3 -2 -1 0.8 0.38
 3 2 1 1.08 0.42
 -3 2 -1 1.14 0.4
 3 -2 -1 0.81 0.41
 3 -2 -1 1.11 0.42
 -3 -2 1 0.89 0.38
 3 -2 -1 1.08 0.4
 3 2 1 1.64 0.49
 3 2 1 0.82 0.41
 4 -2 1 47.15 2.38
 4 -2 1 45.58 2.38
 -4 2 1 45.5 2.39
 -4 -2 -1 40.92 2.35
 4 -2 1 44.94 2.39
 4 2 -1 43.23 2.48
 4 -2 1 41.86 2.39
 4 2 -1 48.9 2.47
 4 2 -1 48.49 2.54
 -4 -2 1 45.92 2.41
 -4 2 -1 43.49 2.35
 4 -2 -1 45.69 2.4
 4 2 1 42.68 2.42
 4 -2 -1 45.13 2.41
 4 2 1 44.8 2.5
 4 -2 -1 48.7 2.44
 4 -2 -1 47.19 2.39
 4 2 1 49.11 2.57
 5 2 -1 25.02 1.77
 -5 -2 -1 22.84 1.61
 5 -2 1 23.25 1.65
 5 2 -1 25.63 1.82
 -5 2 1 20.16 1.52
 5 -2 1 22.04 1.6
 5 -2 1 21.53 1.61
 5 2 -1 25.23 1.71
 5 -2 -1 22.63 1.63
 5 2 1 19.88 1.67
 5 2 1 22.24 1.74
 -5 2 -1 23.03 1.57
 -5 -2 1 18.87 1.55
 5 -2 -1 20.13 1.57
 5 -2 -1 23.99 1.66
 5 2 1 20 1.58
 5 -2 -1 22.84 1.64
 6 -2 1 0.65 0.59
 6 -2 1 2.02 0.7
 6 2 -1 2.04 0.74
 -6 -2 -1 2.28 0.66
 6 2 -1 0.43 0.57
 -6 2 1 2 0.64
 6 -2 1 1.63 0.68
 6 2 -1 1.27 0.69
 6 2 1 0.78 0.65
 6 2 1 1.63 0.73
 6 -2 -1 1.13 0.62
 -6 2 -1 0.81 0.56
 6 -2 -1 1.46 0.59
 6 -2 -1 1.16 0.61
 -6 -2 1 1.13 0.58
 6 2 1 2.68 0.82
 7 2 -1 2.67 0.91
 -7 2 1 2.23 0.74
 7 -2 1 2.3 0.83
 7 -2 1 2.1 0.81
 -7 -2 -1 2.58 0.8
 7 -2 1 2.97 0.88
 7 2 -1 1.77 0.8
 7 -2 1 2.33 0.88
 7 2 -1 3.01 0.94
 7 2 1 2.18 0.85
 7 -2 -1 2.18 0.77
 7 2 1 3.11 0.98
 7 2 1 1.99 0.8
 7 -2 -1 3.64 0.9
 7 -2 -1 1.75 0.79
 -7 2 -1 2.06 0.77
 -7 -2 1 2.74 0.81
 8 -2 1 -0.08 0.71
 -8 2 1 0.03 0.64
 -8 -2 -1 -0.49 0.63
 8 -2 1 0.57 0.65
 8 2 -1 -0.7 0.67
 8 -2 1 -0.1 0.58
 8 2 -1 0.15 0.69
 8 -2 1 -0.88 0.54
 8 2 -1 0.1 0.74
 8 -2 1 -0.03 0.67
 -8 -2 1 -0.05 0.59
 8 -2 -1 -0.26 0.61
 8 2 1 0.7 0.83
 8 2 1 -0.55 0.61
 8 2 1 0.03 0.81
 8 -2 -1 -0.25 0.67
 -8 2 -1 0.46 0.69
 8 -2 -1 0.32 0.74
 -9 2 1 8.33 1.48
 9 2 -1 6.32 1.36
 -9 -2 -1 6.31 1.34
 9 2 -1 3.29 1.11
 9 -2 1 4.72 1.19
 9 -2 1 7.63 1.43
 9 -2 1 6.2 1.37
 9 2 -1 5.84 1.36
 9 -2 1 3.55 1.21
 9 2 1 4.36 1.26
 9 2 1 5.33 1.27
 9 2 1 5.34 1.27
 -9 -2 1 4.12 1.17
 -9 2 -1 5.31 1.32
 9 -2 -1 4.05 1.26
 9 -2 -1 4.51 1.14
 9 -2 -1 7.11 1.4
 9 -2 -1 7.94 1.45
 -10 2 1 2.33 0.97
 -10 -2 -1 0.76 0.79
 10 -2 1 -0.4 0.73
 10 2 -1 0.84 0.93
 10 -2 1 0.75 0.79
 10 2 -1 1.57 0.84
 10 2 -1 0.29 0.87
 10 -2 1 1.06 0.73
 10 -2 1 0.68 0.72
 10 -2 -1 0.06 0.72
 10 -2 -1 2.36 1.01
 10 -2 -1 -0.3 0.84
 10 2 1 -0.23 0.82
 -10 -2 1 1.31 0.97
 -10 2 -1 0.95 0.77
 10 2 1 0.12 0.79
 10 -2 -1 0.75 0.8
 10 2 1 1.3 1.02
 -11 2 1 4.04 1.2
 11 2 -1 1.13 1.02
 11 -2 1 3.15 1.22
 11 -2 1 4.13 1.37
 11 2 -1 4.45 1.5
 11 -2 1 1.77 1.14
 -11 -2 -1 3.94 1.33
 11 -2 1 2.16 1.09
 11 2 -1 1.86 1.16
 -11 2 -1 3.48 1.28
 11 -2 -1 2.07 1.07
 11 2 1 5.2 1.4
 11 2 1 1.22 1.05
 11 -2 -1 2.06 1.12
 11 2 1 3.59 1.24
 11 -2 -1 3.32 1.2
 11 -2 -1 0.79 1.02
 12 2 -1 0.85 1.16
 12 2 -1 0.01 1.01
 12 -2 1 -1.29 0.95
 12 -2 1 -0.49 0.83
 12 2 -1 -0.24 1.05
 12 -2 1 -0.05 1.02
 12 -2 -1 1.21 1.05
 12 -2 -1 0.49 1.06
 12 -2 -1 0.6 1
 12 2 1 1.45 1.22
 12 2 1 -0.9 0.86
 12 -2 -1 0.29 0.91
 12 2 1 0.37 1.01
 -12 2 -1 1.19 0.99
 13 2 -1 0.29 1.13
 13 2 -1 -0.42 1.05
 13 -2 1 0.54 1.16
 13 -2 1 -1.93 1.04
 13 2 -1 -0.62 1.02
 13 2 1 -0.23 1.15
 13 2 1 -0.05 1.19
 13 -2 -1 -0.94 1.02
 13 -2 -1 0.37 1.23
 13 -2 -1 0.69 1.37
 13 2 1 -0.16 1.2
 14 2 -1 1.07 1.42
 14 -2 1 1.53 1.66
 14 2 -1 -0.24 1.34
 14 -2 1 0.09 1.43
 14 2 -1 0.62 1.39
 14 -2 -1 1.03 1.47
 14 2 1 -0.63 1.38
 14 -2 -1 2.59 1.57
 14 2 1 2.31 1.41
 14 2 1 -1.72 1.2
 15 2 -1 1.65 1.97
 15 -2 1 4.72 1.96
 15 2 -1 3.78 1.72
 15 -2 1 4.74 2.12
 15 2 -1 1.02 1.82
 15 -2 -1 0.42 1.68
 15 2 1 0.9 1.88
 15 -2 -1 5.44 1.9
 15 2 1 3.22 1.79
 0 -3 -1 -0.25 0.15
 0 -3 1 0.09 0.17
 0 -3 -1 0.18 0.23
 0 3 -1 0.03 0.19
 0 3 1 -0.08 0.19
 0 3 -1 -0.17 0.17
 0 -3 1 -0.04 0.16
 0 3 1 -0.06 0.17
 0 3 -1 -0.27 0.16
 0 3 1 -0.45 0.16
 1 -3 1 256.19 9.89
 1 3 -1 258.9 9.84
 1 -3 1 232.9 9.83
 -1 -3 -1 245.41 9.93
 1 3 -1 251.15 9.97
 1 3 -1 266.61 10.04
 -1 3 1 251.47 9.84
 -1 3 1 243.69 9.91
 1 -3 1 248.72 9.87
 1 3 1 263.51 10.02
 1 -3 -1 262.16 9.95
 1 3 1 249.87 10.05
 -1 3 -1 241.54 9.79
 -1 3 -1 243.44 9.91
 -1 3 -1 259.16 9.89
 1 3 1 254.59 9.88
 1 -3 -1 279.42 9.95
 -1 -3 1 252.62 9.89
 2 -3 1 7.32 0.65
 2 3 -1 7.87 0.77
 -2 3 1 8 0.71
 2 3 -1 6.14 0.73
 2 -3 1 7.56 0.64
 2 -3 1 7.25 0.67
 -2 -3 -1 8 0.73
 2 3 -1 6.84 0.73
 2 -3 1 6.53 0.68
 2 -3 -1 8.91 0.75
 -2 3 -1 7.97 0.68
 2 -3 -1 6.34 0.7
 2 3 1 8.13 0.79
 2 -3 -1 6.65 0.66
 -2 -3 1 7.77 0.68
 2 -3 -1 7.65 0.71
 2 3 1 6.68 0.75
 2 3 1 7.42 0.77
 3 3 -1 41.92 2.23
 -3 -3 -1 41.52 2.19
 -3 3 1 41.33 2.17
 3 3 -1 43.02 2.28
 3 -3 1 44.4 2.2
 3 -3 1 41.73 2.13
 3 -3 1 41.87 2.15
 3 -3 1 41.14 2.15
 3 3 -1 42.98 2.27
 3 3 1 41.69 2.29
 3 -3 -1 44.24 2.23
 3 3 1 43.52 2.26
 3 -3 -1 46.27 2.23
 3 -3 -1 41.05 2.14
 3 -3 -1 46.46 2.23
 3 3 1 43.86 2.3
 -3 -3 1 38.95 2.13
 -3 3 -1 44.28 2.17
 4 3 -1 274.55 11.05
 4 -3 1 269.28 10.85
 4 -3 1 286.89 10.86
 4 -3 1 252.08 10.78
 4 -3 1 274.12 10.66
 4 3 -1 262.57 10.83
 -4 -3 -1 275.78 10.89
 4 3 -1 266.47 11.01
 -4 3 1 276.63 10.84
 4 -3 -1 254.11 10.63
 -4 3 -1 279.01 10.84
 4 3 1 270.1 11.08
 4 3 1 260.86 10.84
 4 -3 -1 261.92 10.83
 -4 -3 1 251.73 10.8
 4 -3 -1 277.73 10.87
 4 -3 -1 259.07 10.84
 4 3 1 255.75 10.98
 -5 -3 -1 9.18 1.06
 5 3 -1 11.04 1.16
 5 -3 1 8.65 1.08
 5 3 -1 10.23 1.19
 5 -3 1 12.59 1.19
 5 -3 1 9.82 1.1
 5 3 -1 11 1.23
 5 -3 1 12.56 1.2
 -5 3 1 10.41 1.12
 5 3 1 11.05 1.29
 5 -3 -1 9.8 1.11
 5 -3 -1 9.89 1.08
 5 3 1 9.73 1.17
 -5 -3 1 8.81 1.05
 5 3 1 9.07 1.12
 5 -3 -1 8.59 1.06
 -5 3 -1 11.38 1.11
 5 -3 -1 9.14 1.09
 6 3 -1 106.08 5.65
 6 -3 1 123.38 5.47
 6 3 -1 124.22 5.66
 6 -3 1 109.49 5.47
 -6 -3 -1 122.2 5.59
 6 3 -1 123.04 5.8
 -6 3 1 122.51 5.57
 6 -3 1 119.87 5.58
 -6 -3 1 118.78 5.53
 6 -3 -1 133.72 5.72
 6 3 1 128.9 5.83
 6 3 1 117.23 5.63
 6 -3 -1 115.17 5.55
 6 -3 -1 112.73 5.43
 6 -3 -1 112.64 5.52
 6 3 1 116.41 5.76
 -6 3 -1 121.96 5.54
 -7 3 1 2.07 0.71
 7 -3 1 1.45 0.7
 7 3 -1 1.22 0.84
 7 -3 1 1.84 0.73
 7 3 -1 1.09 0.75
 7 3 -1 1.48 0.78
 7 -3 1 0.76 0.67
 -7 -3 -1 0.53 0.65
 -7 3 -1 1.91 0.71
 7 -3 -1 0.26 0.58
 7 3 1 2.03 0.8
 -7 -3 1 0.15 0.51
 7 3 1 0.4 0.61
 7 -3 -1 -0.29 0.5
 7 -3 -1 1.41 0.7
 7 3 1 0.51 0.77
 8 3 -1 117.44 5.67
 -8 -3 -1 103.06 5.3
 8 -3 1 98.2 5.19
 8 -3 1 99.3 5.33
 8 3 -1 99.57 5.52
 -8 3 1 105.73 5.3
 8 -3 1 112.61 5.41
 8 3 -1 105.51 5.44
 8 3 1 94.75 5.43
 8 3 1 105.11 5.44
 8 3 1 108.62 5.62
 8 -3 -1 109.03 5.41
 8 -3 -1 100.08 5.22
 -8 3 -1 109.83 5.35
 -8 -3 1 98.52 5.22
 8 -3 -1 104.12 5.31
 -9 3 1 65.39 3.93
 9 -3 1 65.71 3.98
 9 -3 1 63.08 3.91
 9 -3 1 58.25 3.76
 -9 -3 -1 60.38 3.82
 9 3 -1 57.86 3.88
 9 3 -1 67.46 4.16
 9 -3 1 70.04 4.03
 9 3 -1 61.42 4.07
 -9 -3 1 66.08 3.89
 9 3 1 63.3 4.09
 9 -3 -1 64.16 3.87
 9 -3 -1 64.71 3.98
 9 3 1 70.12 4.11
 9 3 1 63.93 4.08
 -9 3 -1 63.52 3.85
 9 -3 -1 61.97 3.87
 10 3 -1 13.93 2.17
 10 -3 1 16.6 2.03
 10 -3 1 14.16 1.82
 -10 3 1 12.64 1.9
 -10 -3 -1 17.05 1.94
 10 3 -1 15.5 2.04
 10 3 -1 13.26 2.03
 10 -3 1 12.33 1.89
 10 -3 1 14.17 1.88
 10 3 1 14.82 1.92
 10 -3 -1 11.43 1.82
 10 3 1 14.25 1.95
 10 3 1 16.42 2.13
 -10 3 -1 16.12 1.89
 10 -3 -1 15.12 1.86
 10 -3 -1 14.6 1.9
 10 -3 -1 14.4 1.94
 -10 -3 1 15.5 1.95
 11 3 -1 76.17 4.84
 11 -3 1 68.62 4.52
 11 -3 1 70.15 4.67
 11 3 -1 79.11 4.99
 -11 3 1 74.05 4.56
 11 -3 1 78.05 4.74
 11 3 -1 80.11 5.03
 -11 -3 -1 70.82 4.55
 11 -3 1 71.52 4.79
 11 3 1 74.38 4.81
 11 -3 -1 73.96 4.59
 -11 3 -1 71.94 4.57
 11 -3 -1 74.57 4.66
 11 3 1 76.56 4.93
 11 3 1 79.84 4.99
 11 -3 -1 75.71 4.85
 11 -3 -1 75.34 4.78
 12 -3 1 0.81 1.17
 12 -3 1 0.56 1.17
 -12 3 1 0.75 1
 12 3 -1 0.21 1.16
 12 -3 1 0.06 1
 12 3 -1 0.59 0.97
 12 3 -1 1.04 1.13
 12 -3 1 0.36 0.92
 12 -3 -1 -0.21 0.94
 12 3 1 2.47 1.31
 12 -3 -1 1.22 1.15
 12 3 1 1.83 1.15
 12 -3 -1 0.04 1.08
 12 3 1 0.74 1.04
 12 -3 -1 -0.2 0.9
 -12 3 -1 1.41 1.15
 13 3 -1 46.19 4.05
 13 -3 1 47.46 3.99
 13 -3 1 46.14 3.95
 13 3 -1 51.3 4.3
 13 3 -1 37.1 3.75
 13 3 1 50.65 4.13
 13 -3 -1 49.78 3.92
 13 3 1 46.45 4.08
 13 3 1 47.03 4.12
 13 -3 -1 49.95 4.07
 13 -3 -1 45.21 4
 13 -3 -1 40.65 3.89
 14 -3 1 7.57 2.01
 14 3 -1 10.56 2.35
 14 -3 1 8.25 2.25
 14 3 -1 5.63 1.89
 14 3 -1 8.9 2.27
 14 -3 -1 3.25 1.75
 14 3 1 7.54 2.09
 14 3 1 8.48 2.26
 14 3 1 5.6 1.95
 14 -3 -1 5.49 1.97
 15 3 -1 30.18 3.66
 15 3 -1 28.39 3.9
 15 -3 1 28.08 3.72
 15 3 -1 32.63 3.8
 15 -3 1 33.49 3.78
 15 -3 -1 30.55 3.92
 15 3 1 34.26 3.84
 15 -3 -1 28.09 3.59
 15 3 1 27.14 3.74
 0 4 -1 132.4 5.46
 0 4 -1 136.15 5.4
 0 4 1 133.35 5.45
 0 4 1 132.9 5.47
 0 -4 1 137.43 5.42
 0 -4 1 130.51 5.4
 0 -4 -1 135.22 5.46
 0 4 -1 134.72 5.43
 0 -4 -1 127.65 5.46
 0 4 1 138.17 5.53
 1 -4 1 27.7 1.47
 1 4 -1 27.86 1.54
 1 -4 1 29.63 1.47
 -1 4 1 29.2 1.53
 1 4 -1 27.96 1.5
 -1 4 1 29.91 1.52
 -1 4 1 29.08 1.55
 -1 -4 -1 33.22 1.56
 1 4 -1 26.81 1.51
 1 -4 -1 25.54 1.45
 1 4 1 30.2 1.6
 1 4 1 28.73 1.54
 1 4 1 30.4 1.61
 1 -4 -1 28.5 1.52
 -1 4 -1 28.13 1.46
 -1 4 -1 28.29 1.5
 -1 4 -1 28.79 1.49
 -1 -4 1 27.09 1.45
 2 4 -1 1.63 0.42
 2 -4 1 2.29 0.48
 -2 4 1 1.99 0.44
 2 4 -1 2.48 0.49
 2 -4 1 1.73 0.43
 2 -4 1 1.58 0.41
 -2 -4 -1 1.86 0.47
 2 -4 1 2.36 0.46
 2 4 -1 2.16 0.5
 2 4 1 1.57 0.49
 -2 4 -1 1.73 0.43
 -2 4 -1 1.77 0.43
 2 4 1 1.84 0.5
 2 -4 -1 1.93 0.46
 2 -4 -1 1.55 0.47
 -2 -4 1 1.52 0.41
 2 -4 -1 2.06 0.45
 2 4 1 1.72 0.51
 -3 4 1 13.8 1.05
 3 -4 1 13.85 1.1
 3 -4 1 12.52 1.02
 3 4 -1 14.72 1.16
 3 -4 1 11.59 1
 -3 -4 -1 13.54 1.08
 3 4 -1 14.09 1.2
 3 4 -1 12.72 1.08
 3 -4 1 11.73 1.03
 3 -4 -1 12.48 1.05
 3 4 1 10.77 1.04
 3 -4 -1 10.71 1.01
 -3 4 -1 12.87 1.02
 3 4 1 13.61 1.15
 3 4 1 12.48 1.11
 3 -4 -1 12.79 1.02
 -3 -4 1 13.29 1.06
 3 -4 -1 12.22 1.03
 4 -4 1 0.44 0.37
 -4 4 1 -0.09 0.35
 4 4 -1 0.17 0.45
 4 4 -1 0.41 0.42
 4 -4 1 0.05 0.39
 4 -4 1 -0.06 0.35
 -4 -4 -1 0.41 0.41
 4 4 -1 0.46 0.49
 4 -4 1 -0.19 0.36
 4 4 1 0.62 0.48
 -4 -4 1 0 0.36
 4 -4 -1 -0.43 0.32
 -4 4 -1 0.12 0.35
 4 -4 -1 0.62 0.46
 4 4 1 0.38 0.47
 4 4 1 -0.34 0.38
 4 -4 -1 0.48 0.4
 4 -4 -1 0.83 0.49
 5 -4 1 7.23 1.02
 5 -4 1 6.54 0.96
 -5 -4 -1 5.21 0.9
 5 4 -1 6.63 1.06
 -5 4 1 5.94 0.94
 5 4 -1 4.57 0.96
 5 -4 1 5.74 0.96
 5 -4 1 3.79 0.79
 5 4 -1 5.86 1.06
 5 -4 -1 5.67 0.93
 5 -4 -1 7.21 0.98
 -5 -4 1 4.66 0.84
 5 4 1 5.21 0.95
 5 -4 -1 3.97 0.86
 5 -4 -1 5.72 0.93
 -5 4 -1 4.66 0.85
 5 4 1 7.4 1.13
 5 4 1 7.11 1.12
 6 4 -1 0.16 0.55
 6 -4 1 -0.34 0.48
 -6 4 1 0.05 0.46
 -6 -4 -1 -0.4 0.4
 6 -4 1 0.08 0.5
 6 4 -1 -0.12 0.5
 6 -4 1 0.46 0.49
 6 4 -1 0.53 0.63
 6 -4 1 -0.47 0.5
 6 4 1 0.46 0.62
 -6 4 -1 -0.38 0.47
 -6 -4 1 -0.11 0.46
 6 -4 -1 -0.48 0.44
 6 4 1 -0.33 0.58
 6 4 1 0.21 0.64
 6 -4 -1 -0.2 0.43
 6 -4 -1 0.37 0.53
 6 -4 -1 0.23 0.46
 -7 -4 -1 0.32 0.59
 7 -4 1 0.9 0.7
 7 4 -1 -0.37 0.63
 7 -4 1 0.64 0.68
 -7 4 1 0.77 0.7
 7 -4 1 1.13 0.62
 7 4 -1 0.35 0.69
 7 4 -1 1.16 0.84
 7 4 1 -0.27 0.68
 7 4 1 0.23 0.68
 -7 -4 1 0.54 0.66
 7 -4 -1 0.31 0.61
 7 4 1 0.81 0.8
 -7 4 -1 0.66 0.62
 7 -4 -1 0.92 0.73
 7 -4 -1 -0.51 0.5
 7 -4 -1 -0.34 0.53
 8 -4 1 1.22 0.83
 8 4 -1 1.91 0.96
 -8 4 1 2.79 0.9
 8 4 -1 1.9 0.84
 8 4 -1 0.79 0.7
 8 -4 1 1.64 0.84
 8 -4 1 2.45 0.93
 -8 -4 -1 1.23 0.82
 8 -4 -1 2.5 0.87
 8 4 1 2.25 0.89
 8 -4 -1 1.24 0.73
 8 4 1 1.03 0.82
 -8 4 -1 0.66 0.71
 -8 -4 1 3.53 1.05
 8 4 1 2.01 0.92
 8 -4 -1 2.99 1.01
 9 -4 1 2.95 1.08
 -9 4 1 2.41 1.02
 -9 -4 -1 1.59 0.96
 9 4 -1 2.46 1.07
 9 4 -1 4.97 1.27
 9 -4 1 2.68 1.01
 9 -4 1 1.47 1.07
 9 4 -1 3.7 1.18
 -9 -4 1 1.57 0.88
 9 -4 -1 1.77 0.83
 9 4 1 1.01 0.87
 9 4 1 1.91 0.89
 9 -4 -1 1.8 0.9
 9 -4 -1 1.19 0.8
 -9 4 -1 1.16 0.72
 9 4 1 3.54 1.1
 10 -4 1 1.43 0.91
 -10 -4 -1 1.61 0.89
 10 4 -1 0.98 0.85
 10 -4 1 1.1 1.13
 10 -4 1 0.86 0.98
 10 4 -1 -1.19 0.66
 10 4 -1 -0.44 0.63
 -10 4 1 1.58 0.91
 10 -4 1 0.02 0.78
 10 -4 -1 -0.11 0.75
 -10 4 -1 1.47 0.89
 10 4 1 -0.76 0.77
 10 4 1 -0.03 0.8
 10 -4 -1 1.19 0.82
 10 -4 -1 1.82 1
 10 4 1 0.19 0.86
 11 4 -1 1.58 1.16
 -11 -4 -1 5.72 1.42
 11 -4 1 3.21 1.3
 -11 4 1 3.18 1.19
 11 4 -1 3.52 1.38
 11 4 -1 4.03 1.45
 11 -4 1 3.57 1.46
 11 -4 1 1.71 1.11
 11 -4 1 3.7 1.25
 11 4 1 3.87 1.47
 11 -4 -1 3.84 1.36
 11 -4 -1 3.96 1.3
 11 -4 -1 3.2 1.22
 11 -4 -1 4.85 1.41
 11 4 1 5.24 1.52
 -11 4 -1 2.19 1.16
 11 4 1 3.43 1.33
 12 4 -1 1.67 1.28
 12 -4 1 1.24 1.12
 12 4 -1 3.57 1.29
 12 4 -1 2.71 1.41
 12 -4 1 1.06 1.25
 -12 4 1 2.93 1.17
 12 -4 1 3.02 1.29
 12 -4 1 1.05 1.09
 12 -4 -1 2.4 1.35
 -12 4 -1 0.96 0.99
 12 -4 -1 2.58 1.34
 12 4 1 1.15 1.27
 12 -4 -1 2.54 1.28
 12 -4 -1 2.56 1.35
 12 4 1 0.57 1.1
 12 4 1 0.45 1.14
 13 -4 1 0.94 1.26
 13 4 -1 -0.21 1.2
 13 4 -1 0.44 1.31
 13 4 -1 0.7 1.38
 13 -4 1 -0.61 0.99
 -13 4 -1 -0.69 1.04
 13 4 1 -2.08 1.1
 13 -4 -1 1.65 1.25
 13 4 1 1.49 1.37
 13 4 1 0.66 1.11
 13 -4 -1 -0.6 1.06
 13 -4 -1 0.55 1.08
 13 -4 -1 -0.5 1.16
 14 4 -1 -0.95 1.13
 14 -4 1 -0.77 1.11
 14 4 -1 2.07 1.65
 14 4 -1 -0.41 1.23
 14 -4 1 0.39 1.45
 14 -4 -1 -0.53 1.27
 14 4 1 1.96 1.57
 14 4 1 -0.16 1.37
 14 4 1 0.54 1.45
 14 -4 -1 -0.89 1.37
 15 4 -1 -0.07 1.77
 15 -4 1 2.32 1.93
 15 4 -1 -1.86 1.56
 15 4 -1 0.64 1.66
 15 -4 -1 1.61 1.82
 15 4 1 -0.05 1.81
 15 4 1 0.86 1.8
 15 -4 -1 0.69 1.83
 0 5 -1 0.01 0.28
 0 5 -1 0.01 0.26
 0 5 1 0.46 0.33
 0 5 1 -0.48 0.25
 0 5 1 -0.03 0.3
 0 -5 1 -0.31 0.2
 0 -5 -1 0.3 0.32
 0 -5 -1 0.02 0.29
 0 -5 1 -0.32 0.22
 0 5 -1 -0.44 0.24
 1 5 -1 290.32 11.52
 1 5 -1 272.68 11.68
 -1 -5 -1 291.61 11.6
 1 -5 1 286.67 11.52
 -1 5 1 304.34 11.53
 1 5 -1 284.67 11.66
 1 -5 1 305.7 11.58
 -1 5 1 304.9 11.68
 -1 5 -1 287.31 11.54
 -1 -5 1 284.5 11.54
 1 -5 -1 299.04 11.61
 1 5 1 294.37 11.7
 1 5 1 302.6 11.76
 -1 5 -1 305.24 11.5
 1 -5 -1 296.03 11.59
 1 5 1 289.61 11.54
 -1 5 -1 279.38 11.59
 2 -5 1 43.11 2.2
 2 -5 1 47.7 2.21
 -2 5 1 44.2 2.25
 2 -5 1 43.09 2.21
 -2 5 1 41.38 2.25
 2 5 -1 44.5 2.34
 2 5 -1 46.82 2.33
 2 5 -1 45.25 2.34
 -2 -5 -1 41.12 2.26
 2 -5 1 48.79 2.29
 2 -5 -1 43.45 2.24
 -2 5 -1 44.32 2.26
 -2 -5 1 46.78 2.26
 2 5 1 44.37 2.35
 -2 5 -1 47.98 2.25
 2 5 1 43.9 2.37
 2 5 1 47.11 2.4
 2 -5 -1 45.88 2.28
 3 5 -1 41.99 2.17
 -3 5 1 33.96 2.01
 3 5 -1 39.77 2.19
 3 -5 1 39.43 2.05
 3 -5 1 34.97 1.96
 3 -5 1 41.56 2.08
 3 5 -1 38.06 2.17
 3 -5 1 38.72 2.07
 -3 -5 -1 34.43 2.05
 3 -5 -1 34.79 2.04
 -3 5 -1 38.19 2.05
 3 5 1 40.01 2.17
 -3 -5 1 38.3 2.1
 3 -5 -1 35.92 1.99
 3 -5 -1 32.43 1.98
 3 5 1 38.37 2.2
 3 5 1 34.23 2.13
 3 -5 -1 35.11 2.03
 4 -5 1 52.27 2.79
 4 -5 1 54.62 2.84
 4 5 -1 48.16 2.87
 4 5 -1 53.83 2.98
 4 5 -1 59.64 3.05
 4 -5 1 56.61 2.86
 -4 -5 -1 49.92 2.81
 -4 5 1 51.66 2.79
 4 -5 1 57.81 2.8
 4 -5 -1 53.78 2.78
 4 -5 -1 59.73 2.9
 -4 -5 1 54.9 2.86
 -4 5 -1 52.72 2.81
 4 -5 -1 55.24 2.85
 4 5 1 51.88 2.9
 4 5 1 62.98 3.12
 4 -5 -1 54.99 2.84
 4 5 1 51.98 2.97
 5 5 -1 24.66 1.91
 5 -5 1 24.57 1.85
 5 5 -1 22.17 1.89
 5 -5 1 28.2 1.86
 -5 -5 -1 26.21 1.83
 5 5 -1 25.37 1.97
 5 -5 1 26.35 1.84
 -5 5 1 24.88 1.81
 5 -5 1 28.1 1.85
 -5 5 -1 22.46 1.71
 5 -5 -1 23.66 1.78
 5 -5 -1 26.97 1.82
 5 5 1 25.2 1.98
 -5 -5 1 24.04 1.76
 5 5 1 24.52 1.95
 5 5 1 24.72 1.88
 5 -5 -1 28.22 1.82
 5 -5 -1 26.97 1.89
 6 5 -1 89.29 4.64
 -6 5 1 87.52 4.38
 6 -5 1 81.22 4.33
 6 -5 1 81.7 4.35
 -6 -5 -1 87.86 4.41
 6 -5 1 92.64 4.43
 6 -5 1 88.71 4.34
 6 5 -1 86.03 4.58
 6 5 -1 88.58 4.55
 6 5 1 79.92 4.53
 6 5 1 88.55 4.65
 6 -5 -1 89.6 4.45
 -6 -5 1 85.22 4.37
 6 -5 -1 91.87 4.45
 6 -5 -1 86.46 4.34
 6 -5 -1 88.85 4.43
 6 5 1 91.97 4.59
 -6 5 -1 91.45 4.45
 7 -5 1 1.04 0.72
 7 5 -1 1.24 0.84
 7 -5 1 1.04 0.73
 7 5 -1 -0.04 0.64
 -7 5 1 0.18 0.62
 7 -5 1 1.6 0.78
 7 5 -1 1.95 0.86
 -7 -5 -1 1.18 0.72
 7 -5 1 0.88 0.75
 7 5 1 0.68 0.72
 7 -5 -1 1.05 0.73
 7 -5 -1 0.77 0.63
 -7 -5 1 1.42 0.72
 7 -5 -1 0.32 0.72
 7 -5 -1 1.07 0.81
 7 5 1 0.9 0.85
 -7 5 -1 1.01 0.67
 7 5 1 0.48 0.84
 -8 5 1 69.04 3.98
 -8 -5 -1 71.37 4.1
 8 5 -1 72.51 4.29
 8 -5 1 75.49 4.08
 8 5 -1 73.85 4.21
 8 -5 1 77.12 4.05
 8 5 -1 65.1 4.15
 8 -5 1 71.72 4.1
 -8 5 -1 70.05 3.99
 8 5 1 66.38 4.16
 8 -5 -1 70.8 4.06
 -8 -5 1 65.84 3.97
 8 5 1 71.57 4.2
 8 5 1 61.06 4.1
 8 -5 -1 73.69 4.1
 8 -5 -1 73.32 4.04
 8 -5 -1 66.34 4.03
 9 5 -1 50.35 3.5
 9 5 -1 49.46 3.56
 9 -5 1 50.2 3.37
 -9 -5 -1 56.2 3.53
 9 5 -1 51.29 3.64
 9 -5 1 52.32 3.43
 -9 5 1 52.18 3.32
 9 -5 1 46.16 3.29
 -9 5 -1 53.61 3.38
 9 -5 -1 48.01 3.31
 9 5 1 45.56 3.47
 9 5 1 49.91 3.61
 9 5 1 46.02 3.42
 9 -5 -1 42.77 3.22
 -9 -5 1 49.86 3.38
 9 -5 -1 54.23 3.39
 10 5 -1 28.27 2.73
 10 -5 1 32.46 2.74
 10 5 -1 25.58 2.54
 10 5 -1 28.91 2.76
 -10 5 1 26.38 2.4
 10 -5 1 27.68 2.63
 10 -5 1 30.69 2.56
 -10 -5 -1 29.76 2.57
 10 5 1 27.63 2.59
 -10 5 -1 29.09 2.53
 10 5 1 26.45 2.68
 10 -5 -1 26.33 2.45
 10 5 1 26.48 2.66
 10 -5 -1 27.72 2.55
 10 -5 -1 22.92 2.39
 11 -5 1 76.35 4.67
 11 5 -1 68.98 4.81
 -11 5 1 77.67 4.73
 11 -5 1 66.86 4.72
 11 -5 1 76.73 4.67
 11 5 -1 75.95 5.02
 11 -5 1 70.97 4.66
 11 5 -1 72.94 4.97
 11 -5 -1 75.82 4.8
 11 5 1 73.14 4.95
 11 -5 -1 74.85 4.78
 11 5 1 70.28 4.81
 -11 5 -1 75.58 4.66
 11 5 1 79.43 5.03
 11 -5 -1 75.86 4.69
 12 -5 1 0.89 1.07
 12 -5 1 0.84 1.1
 12 5 -1 -0.18 1.04
 12 -5 1 1.46 1.17
 12 5 -1 1.9 1.22
 -12 5 1 0.09 0.94
 12 5 -1 -0.09 1
 12 5 1 0.34 1.09
 12 -5 -1 0.94 1.21
 12 -5 -1 0.37 0.99
 12 5 1 -0.47 1.13
 -12 5 -1 -0.29 0.95
 12 5 1 -0.42 1.11
 12 -5 -1 -0.83 0.94
 12 -5 -1 0.68 1.03
 13 5 -1 40.68 3.78
 13 5 -1 37.67 3.58
 13 5 -1 35.67 3.65
 13 -5 1 26.68 3.09
 13 -5 1 42.04 3.57
 -13 5 -1 39.06 3.38
 13 -5 -1 31.65 3.32
 13 -5 -1 28.36 3.24
 13 -5 -1 27.44 3.31
 13 5 1 33.52 3.55
 13 5 1 37.45 3.79
 13 5 1 38.93 3.54
 14 5 -1 -0.03 1.54
 14 -5 1 3.01 1.76
 14 5 -1 -0.89 1.57
 14 5 -1 0.44 1.57
 14 -5 1 -1.45 1.25
 14 -5 -1 3.17 1.59
 14 -5 -1 1.54 1.43
 14 5 1 0.67 1.51
 14 5 1 2.96 1.78
 14 5 1 2.03 1.59
 15 5 -1 24.2 3.79
 15 -5 1 24.13 3.62
 15 5 -1 20.63 3.59
 15 5 -1 14.65 3.09
 15 -5 -1 12.08 2.91
 15 -5 -1 21.22 3.41
 15 5 1 23.6 3.84
 15 5 1 25.6 3.83
 0 6 -1 14.24 1.06
 0 6 -1 14.24 1.05
 0 -6 -1 13.33 1.03
 0 -6 1 12.14 0.98
 0 6 1 14.43 1.06
 0 6 -1 11.71 0.99
 0 -6 1 13.21 0.98
 0 6 1 13.12 1.03
 0 -6 -1 13.65 1.03
 0 6 1 11.84 1.07
 -1 -6 -1 0.68 0.43
 1 6 -1 0.55 0.34
 -1 6 1 1.15 0.43
 1 6 -1 1.19 0.38
 -1 6 1 0.66 0.4
 1 6 -1 1.29 0.41
 1 -6 1 0.65 0.35
 -1 -6 -1 1.05 0.41
 1 -6 1 0.97 0.41
 -1 6 1 0.45 0.34
 -1 -6 1 -0.06 0.34
 1 -6 -1 0.61 0.38
 -1 -6 1 0.94 0.4
 1 -6 -1 0.95 0.42
 -1 6 -1 0.44 0.3
 1 6 1 0.69 0.4
 1 6 1 0.44 0.41
 -1 6 -1 0.62 0.36
 1 6 1 0.87 0.43
 -1 6 -1 0.42 0.33
 -2 6 1 4.44 0.71
 2 -6 1 6.22 0.79
 -2 6 1 5.01 0.73
 2 6 -1 5.9 0.82
 2 6 -1 5.27 0.71
 -2 6 1 5.11 0.75
 2 6 -1 4.91 0.78
 2 -6 1 4.73 0.69
 -2 -6 -1 5.55 0.78
 2 -6 1 4.37 0.69
 2 6 1 6.64 0.86
 2 -6 -1 5.36 0.71
 -2 6 -1 4.11 0.66
 -2 -6 1 5.16 0.74
 -2 6 -1 4.64 0.69
 2 -6 -1 4.36 0.71
 -2 6 -1 3.83 0.67
 2 6 1 4.22 0.74
 2 6 1 4.01 0.74
 3 -6 1 8.77 0.94
 3 -6 1 9.33 0.92
 -3 6 1 7.63 0.89
 3 6 -1 6.82 0.95
 3 6 -1 7.57 0.98
 -3 -6 -1 7.92 0.93
 3 6 -1 6.83 0.92
 3 -6 1 8.5 0.97
 3 -6 1 7.56 0.95
 -3 6 -1 9.59 0.93
 3 -6 -1 8.25 0.91
 3 -6 -1 7.28 0.93
 3 6 1 7.82 1.04
 3 -6 -1 7.17 0.87
 3 -6 -1 9.67 1.01
 3 6 1 8.7 1.01
 3 6 1 5.86 0.94
 -3 -6 1 8.36 0.99
 4 6 -1 -0.1 0.4
 -4 6 1 0.85 0.49
 4 -6 1 -0.17 0.42
 4 -6 1 0.18 0.42
 4 6 -1 1.04 0.59
 4 -6 1 -0.47 0.39
 -4 -6 -1 0.04 0.45
 4 -6 1 0.08 0.37
 4 6 -1 -0.16 0.5
 4 6 1 -0.31 0.45
 -4 6 -1 0.46 0.45
 4 -6 -1 0.15 0.42
 4 -6 -1 0.37 0.45
 4 -6 -1 0.09 0.45
 4 6 1 0.48 0.54
 4 6 1 -0.35 0.41
 4 -6 -1 -0.06 0.41
 -4 -6 1 0.76 0.47
 5 -6 1 1.89 0.67
 -5 6 1 3.05 0.75
 5 -6 1 3.29 0.79
 5 -6 1 2.49 0.71
 5 -6 1 3.1 0.75
 5 6 -1 2.33 0.8
 -5 -6 -1 3.28 0.81
 5 6 -1 3.04 0.86
 5 6 -1 3.56 0.87
 5 6 1 1.58 0.75
 5 -6 -1 2.75 0.7
 -5 6 -1 3.26 0.74
 -5 -6 1 3.13 0.81
 5 6 1 1.72 0.73
 5 -6 -1 1.94 0.7
 5 -6 -1 3.97 0.89
 5 -6 -1 2.26 0.72
 5 6 1 3.39 0.92
 6 -6 1 1.15 0.63
 6 -6 1 0.29 0.57
 6 -6 1 -0.03 0.49
 6 6 -1 0.11 0.65
 -6 6 1 -0.59 0.43
 6 -6 1 -0.15 0.56
 6 6 -1 0.45 0.61
 6 6 -1 -0.05 0.62
 -6 -6 -1 -0.68 0.54
 6 -6 -1 0.36 0.53
 -6 6 -1 -0.3 0.52
 6 6 1 0.63 0.61
 6 -6 -1 0.15 0.6
 6 -6 -1 0.15 0.53
 6 6 1 0.82 0.68
 6 -6 -1 1.05 0.63
 6 6 1 0.36 0.61
 -6 -6 1 -0.31 0.48
 -7 -6 -1 19.95 1.77
 7 -6 1 18.61 1.72
 7 -6 1 15.71 1.67
 7 6 -1 16.11 1.82
 -7 6 1 19.19 1.79
 7 6 -1 14.95 1.79
 7 -6 1 19.66 1.79
 7 -6 1 19.47 1.9
 7 6 -1 19.63 1.93
 7 -6 -1 17.15 1.74
 7 6 1 16.05 1.79
 -7 -6 1 14.98 1.65
 -7 6 -1 20.72 1.78
 7 -6 -1 16.58 1.79
 7 6 1 18.1 1.93
 7 6 1 19.28 1.96
 7 -6 -1 14.39 1.6
 7 -6 -1 12.08 1.62
 -8 6 1 -0.72 0.54
 8 6 -1 0.42 0.77
 8 -6 1 -0.03 0.62
 8 6 -1 0.24 0.65
 8 -6 1 -0.52 0.69
 8 -6 1 0.73 0.73
 -8 -6 -1 0.25 0.73
 8 -6 1 0.43 0.72
 8 6 -1 0.77 0.68
 8 6 1 0.79 0.74
 8 -6 -1 -0.46 0.72
 8 -6 -1 -0.51 0.76
 8 6 1 1.45 0.85
 -8 -6 1 -0.55 0.62
 8 6 1 0.79 0.76
 -8 6 -1 0.25 0.66
 8 -6 -1 0.43 0.85
 8 -6 -1 0.61 0.76
 -9 -6 -1 23.25 2.24
 -9 6 1 21.06 2.01
 9 6 -1 17.35 2.05
 9 6 -1 23.26 2.34
 9 -6 1 22.96 2.34
 9 -6 1 19.51 2.14
 9 6 -1 20.94 2.3
 9 -6 1 21.16 2.08
 -9 6 -1 20.42 2.02
 9 -6 -1 20.96 2.1
 9 -6 -1 17.42 2.01
 9 6 1 17.66 2.11
 9 6 1 20.97 2.25
 9 6 1 19.9 2.13
 9 -6 -1 23.38 2.37
 9 -6 -1 21.29 2.24
 10 -6 1 10.65 1.81
 10 6 -1 10.95 2.03
 -10 6 1 6.39 1.39
 10 6 -1 7.71 1.72
 10 6 -1 7.73 1.68
 10 -6 1 9.96 1.71
 -10 -6 -1 9.99 1.73
 -10 6 -1 9.68 1.67
 10 6 1 5.99 1.62
 10 6 1 11.75 1.99
 10 -6 -1 8.99 1.65
 10 6 1 10.46 1.91
 10 -6 -1 8.91 1.67
 10 -6 -1 8.84 1.65
 11 6 -1 2.79 1.21
 -11 6 1 2.67 1.05
 11 -6 1 4.67 1.46
 11 6 -1 2.28 1.34
 11 -6 1 2.88 1.29
 11 -6 1 4.97 1.51
 11 6 -1 2.45 1.3
 11 -6 -1 4.14 1.42
 11 6 1 4.11 1.34
 11 6 1 4.06 1.61
 11 6 1 2 1.3
 -11 6 -1 4.68 1.39
 11 -6 -1 4.82 1.43
 12 6 -1 9.66 2.2
 12 6 -1 11.25 2.19
 12 -6 1 6.85 1.78
 12 -6 1 5.77 1.69
 -12 6 1 7.28 1.66
 12 6 -1 13.17 2.41
 -12 6 -1 6.38 1.55
 12 6 1 6.48 1.97
 12 6 1 8.49 2.05
 12 -6 -1 7.74 1.96
 12 6 1 5.97 1.8
 12 -6 -1 6.44 1.73
 12 -6 -1 11.64 2.02
 13 -6 1 2.36 1.39
 13 6 -1 2.28 1.61
 13 -6 1 1.37 1.38
 13 6 -1 2.89 1.66
 13 6 -1 3.88 1.59
 -13 6 -1 2.22 1.31
 13 6 1 1.08 1.76
 13 6 1 1.55 1.51
 13 -6 -1 1 1.19
 13 -6 -1 1.92 1.4
 13 6 1 1.3 1.44
 13 -6 -1 0.04 1.28
 14 6 -1 0.29 1.5
 14 6 -1 0.96 1.51
 14 -6 1 0.9 1.4
 14 6 -1 1.6 1.61
 14 6 1 4.03 1.66
 14 -6 -1 2.6 1.64
 14 6 1 4.56 1.83
 14 -6 -1 1.72 1.67
 14 6 1 1.75 1.66
 15 6 -1 -0.26 1.6
 15 6 -1 -1.67 1.71
 15 6 -1 0.53 1.76
 15 -6 -1 1.94 1.76
 15 -6 -1 1.6 1.72
 15 6 1 1.43 2.17
 15 6 1 1.58 1.94
 0 7 -1 0.34 0.36
 0 -7 1 -0.11 0.32
 0 7 1 -0.12 0.33
 0 7 -1 -0.12 0.36
 0 7 1 0.81 0.42
 0 -7 -1 0.38 0.37
 0 -7 1 -0.07 0.31
 0 7 -1 -0.31 0.25
 0 7 1 0.03 0.34
 0 -7 -1 0.19 0.33
 -1 -7 -1 209.69 8.69
 1 -7 1 212.82 8.62
 -1 -7 -1 210.48 8.66
 1 7 -1 208.8 8.77
 1 -7 1 208.52 8.57
 1 7 -1 201.7 8.73
 -1 7 1 206.44 8.74
 -1 7 1 211.41 8.67
 -1 7 1 211.94 8.65
 1 7 -1 205.56 8.63
 -1 7 -1 206.86 8.7
 1 -7 -1 217.99 8.69
 -1 -7 1 214.48 8.65
 -1 7 -1 207.81 8.62
 1 -7 -1 214.66 8.68
 -1 -7 1 205.52 8.58
 1 7 1 227.11 8.73
 1 7 1 215.67 8.81
 -1 7 -1 204.83 8.56
 -2 7 1 65.86 3.3
 -2 7 1 70.49 3.39
 2 7 -1 66.35 3.37
 -2 7 1 65.58 3.28
 -2 -7 -1 71.1 3.33
 2 7 -1 63.96 3.35
 2 -7 1 65.51 3.22
 2 7 -1 71.12 3.38
 2 -7 1 73.13 3.29
 -2 7 -1 76.81 3.35
 -2 -7 1 66.1 3.27
 2 7 1 63.04 3.33
 2 7 1 67.63 3.46
 2 -7 -1 65.87 3.29
 -2 7 -1 67.09 3.26
 -2 7 -1 69.4 3.33
 2 -7 -1 68.41 3.3
 2 7 1 68.64 3.49
 3 -7 1 96.82 4.34
 -3 7 1 96.99 4.39
 -3 7 1 95.29 4.39
 3 7 -1 94.06 4.43
 3 -7 1 96.88 4.35
 3 7 -1 100.08 4.56
 3 -7 1 96.34 4.26
 3 7 -1 88.85 4.46
 3 -7 1 88.6 4.26
 -3 -7 -1 96.25 4.42
 3 7 1 91.32 4.44
 3 -7 -1 91.35 4.34
 3 7 1 89.34 4.5
 -3 7 -1 92.37 4.33
 -3 -7 1 95.16 4.37
 3 -7 -1 92.41 4.37
 -3 7 -1 100.68 4.4
 3 -7 -1 89.03 4.33
 3 7 1 92.62 4.55
 4 -7 1 108.74 5.28
 -4 -7 -1 114.88 5.39
 4 7 -1 111.91 5.41
 4 -7 1 125.1 5.28
 4 -7 1 107.06 5.26
 4 -7 1 116.26 5.31
 -4 7 1 122.32 5.4
 4 7 -1 128.68 5.63
 4 7 -1 115.15 5.54
 4 7 1 129.48 5.69
 -4 7 -1 111.39 5.3
 4 -7 -1 125.89 5.43
 4 7 1 121.41 5.5
 -4 -7 1 116.23 5.36
 4 -7 -1 114.84 5.24
 4 7 1 130.03 5.7
 4 -7 -1 106.67 5.3
 4 -7 -1 114.29 5.33
 5 -7 1 16.07 1.46
 5 -7 1 13.24 1.41
 5 -7 1 13.68 1.36
 5 -7 1 14 1.43
 5 7 -1 15.83 1.62
 5 7 -1 15.44 1.55
 -5 -7 -1 12.76 1.43
 5 7 -1 14.89 1.51
 -5 7 1 17.02 1.51
 5 7 1 15.07 1.61
 -5 7 -1 19.34 1.54
 5 -7 -1 15.8 1.48
 5 -7 -1 16.49 1.49
 5 7 1 15.33 1.61
 5 7 1 19.48 1.72
 5 -7 -1 16.94 1.43
 5 -7 -1 16.13 1.48
 -5 -7 1 16.06 1.47
 6 -7 1 81 4.14
 6 7 -1 77.51 4.34
 6 7 -1 79.52 4.46
 -6 7 1 82.48 4.23
 -6 -7 -1 81.03 4.24
 6 -7 1 75.28 4.13
 6 7 -1 72.67 4.38
 6 -7 1 81.58 4.19
 6 -7 1 86.53 4.29
 6 -7 -1 80.69 4.22
 6 -7 -1 80.01 4.15
 6 -7 -1 89.66 4.36
 6 7 1 83.62 4.43
 -6 7 -1 79.15 4.22
 6 7 1 86.13 4.54
 -6 -7 1 83.3 4.23
 6 7 1 77.62 4.47
 6 -7 -1 82.95 4.26
 7 7 -1 1.12 0.77
 7 7 -1 2.22 0.95
 -7 -7 -1 1.07 0.75
 -7 7 1 1.2 0.76
 7 7 -1 3.88 1.01
 7 -7 1 0.98 0.73
 7 -7 1 0.99 0.73
 7 -7 1 0.52 0.68
 7 -7 1 1.07 0.76
 7 -7 -1 0.93 0.75
 7 -7 -1 0.88 0.81
 7 7 1 1.31 0.76
 -7 -7 1 1.28 0.72
 7 7 1 0.68 0.79
 7 -7 -1 1.67 0.81
 -7 7 -1 1.65 0.74
 7 7 1 0.67 0.82
 7 -7 -1 0.37 0.65
 -8 7 1 47.53 3.11
 8 7 -1 47.32 3.28
 8 7 -1 45.87 3.32
 8 -7 1 50.05 3.2
 8 7 -1 52.55 3.47
 8 -7 1 46.03 3.14
 8 -7 1 47.14 3.24
 8 -7 1 44.97 3.05
 -8 -7 -1 46.34 3.19
 8 -7 -1 45.64 3.12
 -8 -7 1 48.28 3.18
 8 7 1 44.44 3.21
 8 -7 -1 45.55 3.06
 8 7 1 50.27 3.46
 8 -7 -1 46.53 3.08
 8 -7 -1 41.69 3.06
 8 7 1 50.08 3.42
 -8 7 -1 41.99 2.98
 -9 -7 -1 54.5 3.5
 9 7 -1 46.63 3.52
 9 7 -1 42.94 3.53
 9 -7 1 52.87 3.36
 9 7 -1 53.87 3.64
 -9 7 1 51.12 3.34
 9 -7 1 50.08 3.4
 -9 7 -1 42.38 3.21
 9 -7 -1 52.86 3.56
 9 -7 -1 51.78 3.43
 9 -7 -1 44.29 3.28
 9 7 1 49.91 3.68
 9 7 1 51.7 3.7
 9 -7 -1 47.09 3.37
 9 7 1 43.13 3.31
 10 7 -1 54.45 3.97
 10 -7 1 62.65 3.93
 10 7 -1 60.02 4.13
 10 -7 1 54.63 3.68
 -10 7 1 52.66 3.65
 10 7 -1 54.2 4.03
 10 -7 -1 49.87 3.7
 10 -7 -1 45.71 3.49
 10 7 1 50.91 3.99
 10 7 1 50.35 3.89
 10 7 1 55.64 3.85
 -10 7 -1 54.3 3.71
 11 -7 1 97.53 5.6
 11 7 -1 94.34 5.9
 11 -7 1 95.77 5.48
 -11 7 1 89.87 5.47
 11 7 -1 94.15 5.9
 11 7 -1 97.93 5.83
 11 7 1 91.02 5.88
 -11 7 -1 91.83 5.46
 11 -7 -1 95.82 5.58
 11 7 1 92.87 5.64
 11 -7 -1 94.04 5.51
 11 7 1 84.95 5.75
 -12 7 1 6.48 1.64
 12 7 -1 5.11 1.77
 12 7 -1 8.21 1.99
 12 7 -1 7.39 1.85
 12 -7 1 6.39 1.75
 12 7 1 5.47 1.76
 -12 7 -1 7.94 1.87
 12 7 1 8.91 2.18
 12 7 1 8.37 1.79
 12 -7 -1 6.32 1.73
 12 -7 -1 5.54 1.64
 13 7 -1 35.05 3.61
 13 -7 1 37.28 3.62
 13 7 -1 32.38 3.57
 13 -7 1 33.05 3.33
 13 7 -1 28.74 3.43
 13 7 1 37.27 3.65
 13 7 1 27.59 3.39
 -13 7 -1 41.41 3.52
 13 7 1 29.79 3.41
 13 -7 -1 33.43 3.29
 14 7 -1 0.83 1.44
 14 -7 1 0.91 1.37
 14 7 -1 2.2 1.67
 14 7 -1 1.24 1.46
 14 7 1 -0.11 1.41
 14 7 1 2.19 1.77
 14 -7 -1 -0.09 1.48
 14 -7 -1 1.36 1.65
 14 7 1 0.42 1.42
 15 7 -1 19.75 3.25
 15 -7 -1 18.73 3.18
 15 7 1 13.66 3.07
 0 8 1 24.7 1.64
 0 8 -1 24.85 1.62
 0 8 -1 23.55 1.62
 0 -8 -1 24.93 1.61
 0 8 1 23.35 1.62
 0 -8 1 24.73 1.6
 0 8 1 24.44 1.68
 0 -8 -1 23.36 1.62
 0 8 -1 25.47 1.62
 0 -8 1 26.08 1.61
 -1 8 1 0.62 0.46
 -1 -8 -1 1.04 0.48
 1 8 -1 0.22 0.37
 1 8 -1 -0.07 0.37
 -1 8 1 1.3 0.53
 1 -8 1 0.02 0.36
 -1 8 1 1.48 0.54
 -1 -8 -1 0.53 0.43
 1 -8 1 1.22 0.49
 -1 8 -1 0.93 0.42
 1 8 1 0.65 0.49
 -1 -8 1 0.63 0.47
 1 8 1 0.88 0.55
 -1 8 -1 1.31 0.46
 1 -8 -1 1.38 0.53
 -1 8 -1 1.01 0.47
 -1 -8 1 1.01 0.44
 1 8 1 1.58 0.56
 1 -8 -1 0.85 0.44
 -2 8 1 40.35 2.54
 -2 8 1 45.68 2.56
 -2 -8 -1 45.4 2.54
 2 8 -1 47.91 2.63
 -2 8 1 48.98 2.57
 2 8 -1 44.21 2.56
 2 8 -1 47.91 2.62
 2 -8 1 48.66 2.54
 2 -8 1 46.89 2.5
 -2 8 -1 50.43 2.56
 2 8 1 45.42 2.68
 -2 -8 1 47.68 2.57
 2 -8 -1 46.21 2.55
 -2 8 -1 45.7 2.55
 2 -8 -1 44.51 2.52
 -2 8 -1 49.78 2.58
 2 8 1 45.65 2.63
 2 8 1 45.6 2.68
 -3 8 1 1.37 0.67
 3 -8 1 2.29 0.64
 3 8 -1 1.13 0.48
 -3 8 1 1.45 0.61
 3 8 -1 0.96 0.56
 3 -8 1 0.97 0.46
 -3 -8 -1 1.2 0.57
 3 -8 1 1.27 0.57
 3 -8 1 1.68 0.58
 3 8 -1 0.8 0.52
 3 8 1 1.05 0.61
 3 -8 -1 0.33 0.45
 3 8 1 1.42 0.59
 -3 8 -1 0.75 0.52
 -3 8 -1 1.8 0.62
 3 -8 -1 1.09 0.52
 3 -8 -1 0.52 0.52
 3 8 1 0.65 0.56
 -3 -8 1 1.79 0.63
 4 8 -1 -0.29 0.49
 -4 8 1 -0.21 0.38
 4 -8 1 -0.14 0.39
 4 8 -1 1.09 0.62
 -4 -8 -1 -0.11 0.47
 4 -8 1 -0.14 0.5
 4 -8 1 -0.83 0.43
 4 8 -1 0.15 0.59
 4 -8 1 -0.71 0.37
 4 -8 -1 1.07 0.53
 4 -8 -1 0.73 0.51
 4 8 1 -0.78 0.42
 -4 8 -1 0.15 0.51
 4 8 1 -0.55 0.44
 4 -8 -1 0.4 0.48
 4 8 1 0.25 0.58
 -4 -8 1 0.39 0.54
 4 -8 -1 0.06 0.45
 5 8 -1 1.04 0.66
 5 -8 1 1.1 0.6
 5 8 -1 -0.45 0.58
 5 -8 1 2.12 0.76
 5 -8 1 0.98 0.59
 5 8 -1 2.02 0.8
 -5 -8 -1 1.66 0.72
 5 -8 1 1.34 0.73
 -5 8 1 1.92 0.7
 5 8 1 0.89 0.71
 5 -8 -1 0.36 0.58
 -5 -8 1 0.8 0.66
 5 -8 -1 0.98 0.64
 5 -8 -1 1.03 0.63
 5 8 1 1.68 0.75
 -5 8 -1 1.45 0.69
 5 8 1 1.3 0.72
 5 -8 -1 2.28 0.71
 -6 -8 -1 0.2 0.65
 6 -8 1 1.71 0.76
 6 -8 1 1.45 0.74
 -6 8 1 0.57 0.6
 6 8 -1 -0.36 0.6
 6 -8 1 -0.51 0.51
 6 -8 1 0.72 0.65
 6 8 -1 0.79 0.6
 6 8 -1 0.77 0.7
 6 8 1 1.46 0.84
 6 -8 -1 0.14 0.6
 6 8 1 0.08 0.68
 -6 -8 1 1.03 0.66
 -6 8 -1 0.49 0.6
 6 8 1 0.56 0.75
 6 -8 -1 1.05 0.73
 6 -8 -1 1.17 0.74
 6 -8 -1 0.43 0.55
 7 -8 1 15.69 1.71
 7 8 -1 9.81 1.61
 7 8 -1 14.15 1.71
 7 -8 1 14.59 1.69
 7 8 -1 12.69 1.68
 7 -8 1 14.51 1.67
 -7 8 1 11.61 1.49
 -7 -8 -1 15.84 1.64
 7 -8 1 12.48 1.63
 7 8 1 14.52 1.72
 -7 -8 1 12.55 1.57
 7 -8 -1 14.14 1.59
 -7 8 -1 12.1 1.48
 7 8 1 14.14 1.72
 7 8 1 12.45 1.63
 7 -8 -1 15.35 1.69
 7 -8 -1 16.85 1.75
 7 -8 -1 14.88 1.7
 -8 -8 -1 0.01 0.82
 8 8 -1 0.35 0.66
 -8 8 1 -0.24 0.63
 8 -8 1 -0.71 0.51
 8 8 -1 0.27 0.8
 8 -8 1 0.48 0.84
 8 8 -1 -0.54 0.69
 8 -8 -1 -0.4 0.79
 8 8 1 -0.59 0.64
 8 -8 -1 -0.37 0.71
 -8 8 -1 0.26 0.65
 8 -8 -1 -0.33 0.61
 8 8 1 1.75 0.89
 8 8 1 -0.65 0.64
 8 -8 -1 1.14 0.87
 9 8 -1 5.57 1.4
 -9 8 1 5.11 1.16
 9 8 -1 4.48 1.38
 9 -8 1 3.86 1.16
 9 8 -1 5.95 1.4
 9 -8 1 3.12 1.16
 9 -8 -1 4.03 1.14
 -9 8 -1 3.92 1.16
 9 8 1 2.8 1.09
 9 8 1 5.95 1.45
 9 -8 -1 4.62 1.23
 9 8 1 4.08 1.28
 10 -8 1 3.54 1.26
 -10 8 1 3.57 1.17
 10 8 -1 2.42 1.22
 10 8 -1 2.92 1.16
 10 8 -1 0.55 0.9
 10 -8 1 3.57 1.16
 10 8 1 0.35 0.85
 10 -8 -1 2.83 1.07
 -10 8 -1 3.63 1.17
 10 -8 -1 1.87 1.08
 10 8 1 2.57 1.21
 10 8 1 0.4 1.01
 11 -8 1 1.35 1.13
 11 8 -1 1.58 1.19
 -11 8 1 1 0.94
 11 8 -1 0.7 1.08
 11 8 -1 0.14 1.03
 11 -8 -1 0.33 0.93
 11 8 1 2.13 1.22
 11 8 1 0.4 1.1
 11 8 1 2.51 1.23
 -11 8 -1 1.6 1.01
 11 -8 -1 3.31 1.32
 -12 8 1 6.36 1.55
 12 8 -1 3.75 1.69
 12 8 -1 3.16 1.5
 12 -8 1 4.02 1.52
 12 8 -1 3.24 1.43
 -12 8 -1 5.72 1.53
 12 8 1 4.98 1.67
 12 -8 -1 3.83 1.55
 12 8 1 4.46 1.73
 12 8 1 8.94 2.11
 13 8 -1 0.33 1.43
 13 8 -1 -1.37 1.33
 13 -8 1 -0.31 1.18
 13 8 -1 -0.1 1.42
 13 -8 1 -0.74 1.12
 13 8 1 -0.61 1.29
 -13 8 -1 2.17 1.28
 13 8 1 -0.09 1.18
 13 8 1 0.74 1.41
 13 -8 -1 0.39 1.38
 14 8 -1 2.24 1.8
 14 8 -1 1.46 1.61
 14 8 -1 3.64 1.79
 14 -8 -1 0.9 1.59
 14 -8 -1 1.04 1.37
 14 8 1 5.89 2.09
 14 8 1 3.32 1.75
 14 8 1 0.82 1.48
 15 8 -1 2.18 1.98
 15 -8 -1 2.4 1.79
 0 -9 -1 -0.11 0.39
 0 9 -1 -0.56 0.36
 0 -9 -1 -0.24 0.37
 0 9 1 0.26 0.44
 0 9 -1 0.05 0.38
 0 -9 1 -0.5 0.4
 0 9 1 0.93 0.5
 0 -9 1 -0.06 0.35
 0 9 1 -0.04 0.4
 0 9 -1 0.08 0.32
 1 -9 1 189.67 7.87
 -1 9 1 182.53 7.94
 -1 9 1 191.13 8.08
 -1 -9 -1 190.76 7.99
 -1 9 1 192.83 7.99
 1 9 -1 197.04 8.12
 1 -9 1 187.12 7.89
 1 9 -1 190.08 7.97
 -1 -9 -1 180.43 7.92
 1 9 -1 179.48 7.92
 1 -9 -1 179.17 7.92
 -1 9 -1 184 7.93
 -1 9 -1 185.74 7.89
 -1 -9 1 186.06 7.92
 1 9 1 194.94 8.01
 -1 -9 1 186.33 7.88
 -1 9 -1 177.41 7.97
 1 9 1 190.89 8.18
 1 9 1 188.19 7.99
 1 -9 -1 184.38 7.92
 -2 9 1 20.05 1.53
 2 -9 1 23.91 1.57
 2 9 -1 16.71 1.52
 -2 9 1 17.61 1.56
 2 9 -1 18.78 1.51
 2 9 -1 22.76 1.66
 -2 9 1 20.16 1.61
 2 -9 1 21.42 1.54
 -2 -9 -1 21.58 1.62
 -2 -9 1 22.95 1.58
 -2 -9 1 20.65 1.55
 2 9 1 21.79 1.71
 2 -9 -1 19.01 1.52
 -2 9 -1 19.89 1.53
 2 -9 -1 19.23 1.58
 -2 9 -1 19.58 1.58
 -2 9 -1 22.65 1.6
 2 9 1 24.76 1.75
 2 9 1 19.56 1.6
 3 9 -1 45.12 2.66
 3 -9 1 42.25 2.46
 -3 -9 -1 40.34 2.49
 -3 9 1 41.1 2.52
 3 -9 1 42.27 2.51
 -3 9 1 45.25 2.59
 3 9 -1 40.46 2.64
 3 -9 1 41.03 2.41
 3 -9 1 43.78 2.52
 3 9 1 38.73 2.6
 3 9 1 47.61 2.76
 3 -9 -1 42.5 2.49
 3 9 1 44.51 2.75
 -3 9 -1 46.6 2.59
 -3 9 -1 44.46 2.52
 3 -9 -1 44.5 2.55
 -3 -9 1 41.72 2.47
 4 -9 1 94.53 4.35
 -4 9 1 89.72 4.45
 4 -9 1 94.86 4.46
 -4 -9 -1 88.89 4.47
 4 9 -1 95.37 4.62
 4 -9 1 78.13 4.27
 4 9 -1 103.4 4.78
 4 -9 1 93.95 4.47
 4 -9 -1 85.14 4.3
 4 -9 -1 84.07 4.43
 4 9 1 87.11 4.63
 -4 9 -1 82.85 4.39
 4 -9 -1 96.71 4.51
 4 9 1 90.85 4.7
 -4 -9 1 86.06 4.4
 4 9 1 90.85 4.59
 4 -9 -1 94.02 4.48
 -5 -9 -1 1.54 0.72
 5 9 -1 2.46 0.87
 5 -9 1 2.66 0.8
 5 -9 1 1.7 0.72
 5 -9 1 1.73 0.75
 -5 9 1 3.01 0.81
 5 -9 1 2.64 0.79
 5 9 -1 2.48 0.89
 5 9 -1 1.97 0.84
 5 9 1 0.87 0.71
 5 -9 -1 2.87 0.81
 5 9 1 1.38 0.86
 5 9 1 3.2 0.94
 -5 -9 1 1.59 0.74
 5 -9 -1 1.98 0.78
 -5 9 -1 1.58 0.71
 5 -9 -1 1.03 0.66
 5 -9 -1 0.94 0.66
 6 9 -1 73.4 4.08
 6 9 -1 68.54 3.98
 6 9 -1 64.98 3.88
 6 -9 1 62.31 3.61
 6 -9 1 66.16 3.73
 -6 -9 -1 67.98 3.85
 6 -9 1 66.35 3.73
 -6 9 1 69.99 3.8
 6 -9 1 64.49 3.73
 6 9 1 61.33 3.98
 6 -9 -1 68.74 3.8
 -6 9 -1 64.66 3.74
 6 -9 -1 64.61 3.68
 6 -9 -1 73.15 3.89
 6 -9 -1 64.62 3.74
 6 9 1 70.85 4.01
 -6 -9 1 69.18 3.83
 6 9 1 65.68 3.97
 -7 -9 -1 0.34 0.75
 7 9 -1 0.09 0.62
 7 9 -1 -0.57 0.53
 7 -9 1 -0.02 0.77
 -7 9 1 -0.58 0.58
 7 9 -1 -0.2 0.62
 7 -9 1 -0.5 0.51
 7 -9 -1 0.8 0.74
 7 9 1 -0.38 0.62
 7 -9 -1 -0.17 0.58
 7 9 1 0.48 0.73
 -7 9 -1 0.16 0.56
 7 -9 -1 0.03 0.57
 7 9 1 0.88 0.74
 7 -9 -1 -0.38 0.64
 -8 -9 -1 54.22 3.73
 8 9 -1 58.4 3.97
 8 9 -1 60.06 3.98
 8 -9 1 57.5 3.69
 8 9 -1 60.45 3.98
 -8 9 1 61.47 3.77
 8 -9 1 61 3.8
 8 9 1 59.17 3.91
 8 -9 -1 65.07 3.86
 8 -9 -1 60.84 3.85
 8 -9 -1 56.61 3.74
 -8 9 -1 65.81 3.82
 8 9 1 61.35 4.03
 8 9 1 58.5 4.04
 8 -9 -1 64.18 3.81
 9 9 -1 52.94 3.81
 9 -9 1 52.52 3.48
 9 9 -1 53.99 3.78
 9 9 -1 49.19 3.58
 9 -9 1 51.09 3.43
 -9 9 1 48.95 3.37
 9 9 1 41.69 3.54
 -9 9 -1 50.67 3.44
 9 9 1 46.94 3.71
 9 9 1 46.68 3.55
 9 -9 -1 42.12 3.23
 9 -9 -1 47.96 3.43
 10 -9 1 31.7 2.79
 -10 9 1 27.74 2.68
 10 9 -1 33.57 2.99
 10 9 -1 26.81 2.92
 10 9 -1 34.81 3.11
 10 9 1 34.56 3.1
 10 -9 -1 28.74 2.82
 10 9 1 33.01 3.07
 10 -9 -1 29.36 2.73
 -10 9 -1 34.21 2.82
 10 9 1 28.38 2.84
 11 -9 1 54.15 4.07
 11 9 -1 57.24 4.44
 11 9 -1 61.31 4.47
 11 9 -1 54.74 4.39
 -11 9 1 72.92 4.45
 11 9 1 58.01 4.45
 11 -9 -1 60 4.2
 11 9 1 55.82 4.38
 11 9 1 61.82 4.47
 11 -9 -1 60.51 4.22
 -11 9 -1 63.27 4.23
 -12 9 1 -1.82 0.74
 12 9 -1 -0.35 1.12
 12 9 -1 1.55 1.44
 12 -9 1 0.11 0.98
 12 9 -1 0.4 1.11
 12 9 1 1.12 1.22
 12 -9 -1 1.25 1.33
 -12 9 -1 -0.06 0.99
 12 9 1 0.23 1.26
 12 9 1 0.84 1.27
 13 -9 1 42.54 3.73
 13 9 -1 39.28 3.92
 13 9 -1 30.78 3.71
 13 9 -1 43.09 3.95
 13 9 1 34.48 3.69
 13 9 1 41.49 3.99
 13 -9 -1 30.94 3.3
 -13 9 -1 42.29 3.68
 13 9 1 30.98 3.66
 14 9 -1 3.08 1.92
 14 9 -1 2.19 1.95
 14 9 -1 1.47 1.74
 14 -9 1 4.22 1.71
 14 9 1 -0.26 1.39
 14 9 1 0.05 1.69
 14 -9 -1 0.76 1.69
 14 9 1 0.06 1.6
 0 10 1 96.37 4.78
 0 10 1 101.06 4.72
 0 10 1 100.1 4.69
 0 -10 -1 99.15 4.67
 0 -10 1 94.99 4.61
 0 10 -1 98.38 4.66
 0 -10 1 99.23 4.61
 0 10 -1 97.44 4.67
 0 10 -1 96.17 4.71
 0 -10 -1 104.44 4.73
 -1 10 1 1.2 0.63
 1 10 -1 0.89 0.47
 1 -10 1 0.28 0.45
 -1 -10 -1 0.6 0.52
 1 -10 1 0.68 0.49
 1 10 -1 -0.17 0.43
 -1 10 1 -0.18 0.43
 -1 10 1 1.29 0.58
 1 10 -1 1.42 0.59
 -1 -10 -1 0.21 0.48
 -1 -10 1 0.17 0.46
 -1 10 -1 0.62 0.42
 1 -10 -1 0.92 0.53
 -1 -10 1 0.71 0.53
 1 10 1 0.71 0.53
 1 10 1 1.13 0.56
 1 -10 -1 -0.11 0.43
 1 10 1 0.99 0.64
 -1 10 -1 1.26 0.54
 -1 10 -1 1.51 0.58
 2 -10 1 21.79 1.57
 -2 10 1 16.43 1.46
 -2 10 1 18.75 1.59
 2 10 -1 18.89 1.61
 2 10 -1 18.45 1.54
 2 -10 1 20.86 1.57
 -2 10 1 16.26 1.5
 -2 -10 -1 21.99 1.65
 -2 -10 -1 15.3 1.53
 -2 10 -1 19.03 1.52
 2 10 1 20.8 1.72
 2 -10 -1 19.14 1.6
 -2 -10 1 15.74 1.49
 2 10 1 19.13 1.66
 -2 -10 1 16.58 1.44
 2 10 1 16.5 1.59
 -2 10 -1 19.31 1.58
 -2 10 -1 17.73 1.49
 2 -10 -1 16.28 1.49
 -3 10 1 3.98 0.86
 -3 10 1 5.62 1.06
 3 10 -1 2.54 0.8
 3 -10 1 4.1 0.82
 3 10 -1 3.7 0.88
 3 -10 1 4.37 0.86
 3 -10 1 3.33 0.83
 -3 -10 -1 2.83 0.82
 -3 -10 1 4.58 0.91
 3 10 1 4.02 0.94
 3 -10 -1 4.09 0.86
 -3 10 -1 4.37 0.94
 -3 10 -1 3.78 0.9
 3 10 1 5.82 1.09
 3 -10 -1 4.29 0.9
 3 10 1 3.58 0.92
 4 -10 1 9.84 1.2
 -4 -10 -1 10.48 1.39
 4 -10 1 7.65 1.18
 4 10 -1 10.15 1.4
 4 10 -1 11.77 1.36
 -4 10 1 12.34 1.3
 4 -10 1 12.73 1.33
 4 -10 1 7.39 1.15
 4 10 1 11.17 1.4
 4 -10 -1 7.69 1.21
 4 10 1 8.62 1.35
 -4 -10 1 11.98 1.3
 4 10 1 10.46 1.49
 4 -10 -1 11.32 1.31
 4 -10 -1 10.2 1.24
 -4 10 -1 10.73 1.32
 4 -10 -1 11.62 1.3
 -5 10 1 0.74 0.67
 5 -10 1 0.77 0.68
 5 -10 1 -0.07 0.63
 5 -10 1 0.62 0.58
 5 10 -1 0.28 0.67
 5 10 -1 0.74 0.72
 -5 -10 -1 -0.02 0.58
 5 10 -1 1.29 0.73
 5 -10 1 0.04 0.56
 -5 -10 1 0.45 0.62
 5 10 1 0.22 0.66
 5 -10 -1 -0.13 0.6
 5 10 1 0.27 0.64
 5 -10 -1 0.16 0.65
 5 -10 -1 0.85 0.6
 -5 10 -1 0.92 0.68
 5 10 1 0.69 0.8
 5 -10 -1 0.5 0.63
 6 -10 1 11.72 1.5
 -6 10 1 7.73 1.33
 6 10 -1 7.16 1.37
 6 10 -1 9.11 1.51
 6 -10 1 10.06 1.51
 6 10 -1 7.83 1.45
 6 -10 1 9.7 1.48
 -6 -10 -1 10.59 1.58
 6 -10 1 7.3 1.33
 -6 -10 1 5.94 1.24
 6 10 1 7.77 1.46
 6 -10 -1 7.98 1.33
 6 -10 -1 8.68 1.43
 6 -10 -1 8.46 1.32
 6 10 1 6.84 1.35
 -6 10 -1 7.23 1.22
 6 -10 -1 4.59 1.1
 6 10 1 6.18 1.25
 7 10 -1 5.53 1.27
 -7 10 1 5.6 1.2
 7 10 -1 4.99 1.2
 -7 -10 -1 3.66 1.13
 7 10 -1 5.74 1.29
 7 -10 1 5.64 1.29
 7 -10 1 6.05 1.25
 7 10 1 3.58 1.19
 7 10 1 2.8 1.12
 7 10 1 6.61 1.42
 7 -10 -1 5.6 1.29
 7 -10 -1 3.84 1.14
 -7 10 -1 4.88 1.06
 7 -10 -1 4.99 1.14
 7 -10 -1 4.31 1.18
 8 10 -1 -0.7 0.63
 8 10 -1 -0.27 0.7
 8 -10 1 -0.36 0.77
 -8 10 1 -0.71 0.58
 8 10 -1 0.34 0.74
 8 -10 1 0.21 0.62
 8 -10 -1 -0.21 0.72
 8 10 1 -0.12 0.88
 8 -10 -1 -0.18 0.57
 8 10 1 0.28 0.79
 8 10 1 -0.23 0.76
 -8 10 -1 -0.29 0.71
 9 10 -1 4.64 1.38
 9 -10 1 4.73 1.33
 9 -10 1 6.76 1.42
 9 10 -1 3.42 1.37
 9 10 -1 5.08 1.49
 -9 10 1 3.32 1.23
 9 10 1 3.01 1.22
 -9 10 -1 2.58 1.13
 9 -10 -1 3.34 1.13
 9 -10 -1 4.82 1.26
 9 10 1 3.14 1.27
 9 10 1 4.46 1.4
 10 -10 1 9.5 1.77
 -10 10 1 9.41 1.76
 10 10 -1 9.45 1.97
 10 10 -1 11.55 2.12
 10 10 -1 11.86 2
 10 10 1 8.63 1.95
 -10 10 -1 8.64 1.67
 10 10 1 12.2 2.18
 10 -10 -1 11.1 2
 10 10 1 7.83 1.79
 10 -10 -1 7.5 1.68
 11 10 -1 0.04 1.15
 11 10 -1 0.26 0.97
 11 10 -1 -0.27 1.06
 11 -10 1 0.27 0.97
 -11 10 1 -0.44 0.8
 11 10 1 -2.17 1.01
 11 -10 -1 -0.34 1.02
 11 10 1 0.82 1.12
 11 10 1 -0.02 1.25
 -11 10 -1 -0.37 0.88
 12 10 -1 5.21 1.95
 -12 10 1 0.69 1.13
 12 -10 1 3.92 1.69
 12 10 -1 3.45 1.59
 12 10 -1 2.55 1.51
 12 -10 -1 2.71 1.4
 -12 10 -1 3.85 1.52
 12 10 1 1.85 1.56
 12 10 1 -0.21 1.21
 12 10 1 2.57 1.46
 13 10 -1 0.45 1.41
 13 -10 1 0.25 1.48
 13 10 -1 2.3 1.58
 13 10 -1 6.19 2.03
 13 10 1 1.27 1.53
 13 10 1 1.26 1.46
 13 -10 -1 1.66 1.47
 13 10 1 4.63 1.91
 -13 10 -1 4.05 1.74
 14 10 -1 2.2 1.96
 14 10 -1 -0.44 1.8
 14 10 -1 2.79 2.08
 14 -10 1 4.16 2.03
 14 10 1 2.69 1.87
 14 10 1 3.45 2.24
 14 10 1 1.92 1.79
 14 -10 -1 8.64 2.35
 0 -11 1 -0.02 0.45
 0 11 1 0.01 0.54
 0 11 -1 0.76 0.41
 0 11 1 0.57 0.55
 0 -11 -1 0.03 0.45
 0 11 1 -0.08 0.5
 0 11 -1 -0.34 0.45
 0 -11 -1 0.25 0.5
 0 -11 1 0.08 0.48
 0 11 -1 -0.12 0.45
 1 11 -1 169.27 7.36
 1 -11 1 164.32 7.17
 -1 11 1 162.12 7.39
 -1 11 1 159.85 7.28
 1 11 -1 156.21 7.24
 -1 -11 -1 163.74 7.24
 -1 11 1 162.45 7.29
 1 -11 1 151.69 7.13
 -1 -11 -1 164.47 7.3
 1 11 1 175.61 7.41
 1 11 1 162.47 7.33
 -1 11 -1 164.26 7.26
 1 -11 -1 160.35 7.22
 -1 -11 1 157.27 7.15
 1 11 1 165.19 7.47
 -1 11 -1 173.62 7.29
 1 -11 -1 170.98 7.3
 -1 -11 1 166.69 7.24
 -2 -11 -1 5.07 0.97
 2 -11 1 3.34 0.84
 -2 11 1 6.41 1.11
 -2 11 1 3.83 0.92
 -2 11 1 4.92 0.95
 2 -11 1 4.04 0.83
 2 11 -1 2.74 0.84
 -2 -11 -1 4.59 0.95
 2 -11 -1 3.77 0.87
 2 11 1 3.71 0.99
 -2 11 -1 3.41 0.86
 -2 11 -1 2.74 0.82
 2 -11 -1 5.24 0.97
 -2 -11 1 3.1 0.84
 -2 -11 1 5 0.92
 2 11 1 3.31 0.91
 3 -11 1 35.84 2.32
 3 11 -1 33.3 2.42
 -3 11 1 37.91 2.41
 -3 11 1 32.76 2.41
 3 -11 1 34.14 2.26
 -3 -11 -1 30.27 2.28
 3 -11 1 36.89 2.34
 3 -11 -1 32.45 2.3
 3 11 1 36.78 2.56
 3 11 1 36.86 2.55
 -3 11 -1 31.8 2.36
 3 -11 -1 35.56 2.33
 -3 11 -1 40.36 2.43
 3 11 1 40.89 2.57
 -3 -11 1 32.69 2.33
 4 -11 1 28.26 2.08
 4 -11 1 27.99 2.05
 4 11 -1 25.37 2.18
 -4 -11 -1 26.68 2.05
 4 11 -1 28.68 2.21
 4 -11 1 26.89 2.03
 4 -11 1 27.8 2.06
 -4 11 1 26.22 2.07
 4 11 1 30.58 2.32
 4 11 1 26.48 2.28
 4 11 1 28.02 2.31
 -4 -11 1 23.95 2.04
 4 -11 -1 24.33 2.05
 4 -11 -1 28.29 2.11
 -4 11 -1 30.68 2.16
 -4 11 -1 24.52 2.05
 4 -11 -1 28.52 2.09
 4 -11 -1 26.53 2.03
 -5 11 1 15.53 1.62
 5 11 -1 12.49 1.52
 5 -11 1 12.8 1.6
 -5 -11 -1 17.9 1.81
 5 -11 1 14.55 1.63
 5 11 -1 12.63 1.59
 -5 11 -1 15.38 1.56
 5 11 1 13.59 1.6
 5 -11 -1 16.21 1.64
 5 11 1 13.16 1.59
 5 11 1 14.07 1.6
 5 -11 -1 17.22 1.68
 5 -11 -1 11.92 1.49
 5 -11 -1 14.9 1.6
 -6 11 1 51.65 3.31
 -6 -11 -1 53.3 3.42
 6 11 -1 54.48 3.59
 6 11 -1 57.8 3.6
 6 -11 1 57.24 3.39
 6 -11 1 54.59 3.3
 6 11 -1 55 3.56
 -6 11 -1 51.91 3.32
 6 -11 -1 52.47 3.32
 6 11 1 61.44 3.73
 6 11 1 46.07 3.46
 6 11 1 51.46 3.49
 6 -11 -1 60.69 3.49
 6 -11 -1 52.97 3.27
 6 -11 -1 53.63 3.35
 7 11 -1 -1.14 0.47
 -7 11 1 -0.25 0.67
 7 11 -1 -0.45 0.57
 7 -11 1 -0.11 0.8
 7 -11 1 0.48 0.66
 7 11 -1 0.35 0.69
 7 11 1 -0.15 0.79
 -7 11 -1 -0.11 0.59
 7 -11 -1 -0.45 0.82
 7 -11 -1 -0.7 0.6
 7 11 1 0.43 0.72
 7 11 1 0.87 0.88
 8 11 -1 26.26 2.55
 -8 11 1 17.27 2.05
 8 11 -1 26.14 2.55
 8 11 -1 29.04 2.61
 8 -11 1 25.22 2.37
 8 -11 1 27.37 2.36
 8 11 1 25.54 2.52
 8 11 1 23.5 2.53
 8 -11 -1 27.09 2.4
 8 11 1 24.24 2.51
 8 -11 -1 24.98 2.37
 -8 11 -1 23.52 2.27
 9 11 -1 20.2 2.33
 9 11 -1 17.7 2.22
 9 11 -1 16.02 2.17
 9 -11 1 15.61 2
 -9 11 1 14.56 1.92
 9 -11 -1 18.66 2.16
 9 11 1 18.19 2.45
 9 11 1 19.58 2.37
 9 -11 -1 18.84 2.16
 -9 11 -1 24.2 2.26
 9 11 1 19.67 2.36
 10 11 -1 23.29 2.61
 10 -11 1 23.75 2.4
 -10 11 1 19.37 2.26
 10 11 -1 18.09 2.49
 10 11 -1 19.62 2.53
 10 11 1 14.65 2.38
 -10 11 -1 24.98 2.44
 10 11 1 17.33 2.67
 10 -11 -1 20 2.27
 10 11 1 19.05 2.61
 -11 11 1 47.93 3.77
 11 11 -1 47.16 4.07
 11 11 -1 46.55 4.02
 11 11 -1 52.14 4.3
 11 -11 1 50.43 3.84
 11 11 1 46.76 4.04
 11 -11 -1 46.08 3.72
 11 11 1 53.28 4.25
 -11 11 -1 45.68 3.67
 11 11 1 53.71 4.16
 12 11 -1 1.26 1.41
 12 -11 1 1.67 1.5
 12 11 -1 0.67 1.42
 12 11 -1 -1.57 1.16
 -12 11 1 0.62 1.27
 12 11 1 0.34 1.31
 12 11 1 -1.3 1.15
 12 11 1 -0.44 1.23
 -12 11 -1 -0.27 1.11
 12 -11 -1 -1.08 1.1
 13 -11 1 27.68 3.19
 13 11 -1 13.81 2.83
 13 11 -1 26.88 3.35
 13 11 -1 21.04 3.34
 13 -11 -1 25.55 3.11
 13 11 1 25.87 3.25
 13 11 1 22.35 3.14
 -13 11 -1 34.83 3.33
 13 11 1 27.15 3.34
 14 11 -1 4.68 2.15
 14 -11 1 5.23 2.05
 14 11 1 0.61 1.81
 14 -11 -1 2.87 1.52
 0 -12 -1 31.92 2.26
 0 -12 1 33.53 2.25
 0 12 1 37.96 2.4
 0 -12 1 29.29 2.12
 0 12 -1 32.34 2.24
 0 12 -1 33.51 2.28
 0 12 1 32.8 2.36
 0 -12 -1 31.09 2.2
 0 12 1 31.19 2.31
 -1 12 1 11.91 1.39
 -1 12 1 9.36 1.4
 1 12 -1 8.96 1.25
 -1 12 1 9.77 1.28
 1 -12 1 8.67 1.15
 1 -12 1 10.07 1.2
 -1 -12 -1 8.46 1.15
 1 12 -1 10.6 1.38
 -1 -12 -1 10.72 1.31
 -1 -12 1 10.61 1.31
 1 -12 -1 12.71 1.35
 -1 -12 1 9.49 1.23
 1 12 1 11.05 1.41
 -1 12 -1 13.24 1.36
 1 -12 -1 8.85 1.18
 1 12 1 9.47 1.37
 -1 12 -1 12.4 1.33
 1 12 1 10.4 1.41
 -2 12 1 42.2 2.82
 2 -12 1 43.16 2.69
 -2 -12 -1 41.87 2.71
 -2 12 1 37.44 2.64
 2 12 -1 46.49 2.89
 2 12 -1 40.76 2.77
 2 -12 1 41.84 2.68
 -2 12 1 48.43 2.87
 -2 -12 -1 45.57 2.76
 -2 12 -1 46.81 2.79
 2 12 1 47.24 2.84
 2 -12 -1 41.38 2.69
 2 12 1 44.71 2.87
 2 -12 -1 40.22 2.64
 -2 -12 1 44.28 2.71
 2 12 1 48.18 3.05
 -2 -12 1 45.65 2.73
 -2 12 -1 46.78 2.79
 -3 12 1 16.64 1.65
 -3 -12 -1 17.47 1.71
 -3 -12 -1 14.54 1.67
 -3 12 1 15.03 1.64
 3 -12 1 18.35 1.62
 3 12 -1 16.82 1.69
 3 -12 1 17.77 1.57
 3 -12 1 16.04 1.61
 -3 12 1 16.71 1.69
 -3 -12 1 17.65 1.66
 -3 12 -1 17.01 1.69
 -3 12 -1 19.21 1.74
 3 -12 -1 21 1.76
 3 12 1 18.65 1.79
 3 12 1 14.37 1.71
 3 -12 -1 18.22 1.67
 3 12 1 15.16 1.77
 -3 -12 1 17.38 1.7
 -4 -12 -1 2.4 0.96
 -4 12 1 3.14 0.88
 4 12 -1 2.11 0.88
 4 -12 1 1.17 0.78
 -4 12 1 1.97 0.81
 4 12 -1 1.95 0.94
 4 -12 1 3.71 1.02
 -4 12 -1 1.11 0.58
 4 12 1 2 0.75
 4 -12 -1 3.3 0.97
 4 -12 -1 2.15 0.9
 -4 12 -1 2.88 0.88
 4 -12 -1 4.19 1.01
 4 12 1 2.4 0.88
 4 12 1 3.27 0.95
 5 12 -1 31.74 2.52
 -5 12 1 36.39 2.5
 5 -12 1 34.76 2.45
 5 -12 1 31.46 2.35
 -5 -12 -1 31.78 2.52
 5 12 -1 28.27 2.45
 5 -12 -1 31.71 2.42
 5 12 1 30.49 2.54
 5 12 1 30.11 2.49
 5 -12 -1 34.98 2.48
 -5 12 -1 33.42 2.4
 5 12 1 33.14 2.6
 5 -12 -1 30.15 2.36
 5 -12 -1 28.56 2.37
 6 12 -1 10.78 1.75
 6 12 -1 7.79 1.55
 -6 12 1 8.85 1.52
 6 12 -1 12.2 1.87
 6 -12 1 9.3 1.5
 6 -12 1 9.04 1.48
 -6 12 -1 12.49 1.59
 6 12 1 10.23 1.68
 6 -12 -1 10.42 1.62
 6 12 1 8.6 1.56
 6 -12 -1 12 1.54
 6 12 1 9.66 1.66
 7 -12 1 12.37 1.89
 7 12 -1 13.12 2
 -7 12 1 14.41 1.69
 7 12 -1 13.55 2.06
 7 -12 1 13.44 1.71
 7 12 -1 15.49 1.99
 7 -12 -1 13.44 1.71
 7 12 1 16.8 2
 7 12 1 17.29 2.02
 -7 12 -1 11.11 1.54
 7 -12 -1 14.49 1.84
 7 12 1 10.93 1.88
 8 12 -1 0.44 1
 8 12 -1 0.44 0.75
 -8 12 1 0.49 0.78
 8 12 -1 1.39 1
 8 -12 1 0.95 0.83
 8 12 1 0.56 0.9
 8 -12 -1 0.47 0.85
 8 12 1 1.78 1.04
 8 12 1 0.58 1.03
 8 -12 -1 2.31 0.96
 -8 12 -1 0.71 0.92
 -9 12 1 11.21 1.83
 9 -12 1 8.87 1.66
 9 12 -1 6.28 1.79
 9 12 -1 7.16 1.74
 9 12 -1 8.39 1.91
 9 12 1 7.93 1.75
 9 12 1 9.45 1.99
 9 -12 -1 10.4 1.83
 -9 12 -1 7.42 1.61
 9 12 1 11.29 2.06
 -10 12 1 26.07 2.62
 10 12 -1 27.51 2.95
 10 12 -1 28.78 3.01
 10 12 -1 25.76 2.99
 10 -12 1 24.9 2.55
 10 12 1 28.01 2.86
 10 12 1 29.72 3.11
 10 -12 -1 25.89 2.64
 -10 12 -1 21.31 2.49
 10 12 1 23.81 2.77
 -11 12 1 1.65 1.2
 11 -12 1 -0.1 1.14
 11 12 -1 1.94 1.46
 11 12 -1 1.48 1.35
 11 12 -1 0.99 1.26
 -11 12 -1 0.38 1
 11 12 1 2.72 1.53
 11 12 1 1.71 1.38
 11 12 1 0.3 1.22
 11 -12 -1 2.78 1.28
 12 12 -1 8.95 2.29
 12 12 -1 9.69 2.33
 -12 12 1 8.55 2.11
 12 12 -1 14.44 2.68
 12 -12 1 11.44 2.12
 12 12 1 8.65 2.25
 12 -12 -1 7.91 2.04
 -12 12 -1 12.65 2.26
 12 12 1 10.46 2.47
 12 12 1 7.67 2.17
 13 -12 1 0.63 1.33
 13 12 -1 0.43 1.66
 13 12 -1 1.25 1.53
 13 12 -1 -0.58 1.49
 13 -12 -1 -0.64 1.25
 -13 12 -1 0.57 1.36
 13 12 1 -1.16 1.24
 13 12 1 2.15 1.67
 13 12 1 -1.27 1.42
 0 -13 1 0.11 0.6
 0 13 -1 0.29 0.56
 0 -13 -1 0.35 0.57
 0 13 1 0.7 0.71
 0 13 1 0.07 0.55
 0 -13 -1 -0.37 0.55
 0 13 1 0.02 0.54
 0 13 -1 0.66 0.71
 1 -13 1 121.02 5.62
 -1 -13 -1 118.43 5.68
 -1 13 1 106.04 5.65
 1 13 -1 121.91 5.8
 -1 -13 -1 113.52 5.66
 1 13 -1 111.87 5.68
 -1 13 1 114 5.77
 -1 13 1 120.7 5.74
 1 13 1 117.32 5.75
 1 -13 -1 126.06 5.73
 1 -13 -1 120.06 5.69
 1 13 1 119.92 5.8
 -1 -13 1 118 5.62
 1 13 1 119 5.86
 -1 13 -1 115.66 5.68
 -1 13 -1 109.35 5.63
 -2 13 1 12.04 1.51
 -2 13 1 8.58 1.37
 -2 -13 -1 10.74 1.44
 2 13 -1 12.98 1.5
 -2 -13 -1 12.19 1.52
 2 -13 1 14.04 1.49
 2 13 -1 12.65 1.47
 -2 13 1 12.05 1.4
 2 13 1 14.26 1.58
 2 -13 -1 13.02 1.48
 2 -13 -1 13.46 1.52
 2 13 1 15.41 1.61
 -2 13 -1 14.63 1.45
 2 13 1 10.63 1.58
 -2 -13 1 13.57 1.46
 -2 13 -1 13.67 1.45
 -3 -13 -1 63.8 3.51
 -3 13 1 57.02 3.45
 -3 -13 -1 63.23 3.53
 3 13 -1 57.11 3.51
 3 -13 1 56.64 3.34
 -3 13 1 55.57 3.39
 -3 13 1 60.22 3.54
 3 -13 1 57.61 3.34
 3 13 1 54.74 3.5
 3 13 1 57.65 3.58
 3 -13 -1 57 3.4
 -3 13 -1 55.36 3.36
 -3 13 -1 55.13 3.4
 -3 -13 1 53.44 3.35
 3 13 1 60.21 3.6
 3 -13 -1 58.11 3.41
 4 -13 1 30.01 2.35
 -4 13 1 30.7 2.38
 -4 13 1 31.72 2.4
 4 -13 1 30.17 2.31
 4 13 -1 31.23 2.54
 4 13 -1 32.91 2.51
 4 13 1 33.97 2.49
 4 13 1 31.91 2.53
 4 -13 -1 28.55 2.25
 4 13 1 26.44 2.38
 -4 13 -1 29.59 2.38
 -4 13 -1 26.29 2.21
 4 -13 -1 37.26 2.5
 5 13 -1 21.07 2.11
 5 13 -1 17.74 2
 -5 13 1 15.34 1.74
 5 -13 1 13.08 1.64
 5 -13 1 22.89 2.01
 5 -13 -1 19.67 1.89
 5 13 1 17.54 1.92
 5 13 1 14.81 1.83
 5 13 1 17.63 1.97
 5 -13 -1 22.04 2
 -5 13 -1 22.58 1.94
 -6 13 1 60.86 3.74
 6 13 -1 64.36 4.03
 6 13 -1 60.28 3.95
 6 -13 1 52.32 3.49
 6 13 -1 57.38 3.86
 6 13 1 59.1 3.87
 6 13 1 58.99 4.01
 6 -13 -1 62.12 3.85
 -6 13 -1 60.88 3.75
 6 13 1 62.2 4.02
 6 -13 -1 57.46 3.62
 7 13 -1 1.16 0.88
 7 13 -1 0.73 0.8
 7 -13 1 1.78 0.85
 -7 13 1 1.4 0.92
 7 13 -1 3.97 1.31
 -7 13 -1 1.75 0.88
 7 13 1 0.89 0.93
 7 13 1 0.88 0.89
 7 -13 -1 2.11 0.95
 7 -13 -1 2.35 0.95
 7 13 1 2.16 0.99
 8 13 -1 41 3.35
 8 13 -1 47.9 3.55
 -8 13 1 40.5 3.11
 8 -13 1 41.29 3.14
 8 13 -1 34.61 3.08
 -8 13 -1 40.18 3.12
 8 13 1 33.79 3.16
 8 13 1 39.77 3.42
 8 13 1 45.54 3.56
 8 -13 -1 40.81 3.1
 -9 13 1 16.27 2.05
 9 13 -1 14.53 2.42
 9 13 -1 18.2 2.45
 9 -13 1 20.73 2.26
 9 13 -1 11.94 2.12
 9 13 1 16.79 2.62
 9 -13 -1 12.5 1.96
 -9 13 -1 14.34 2.14
 9 13 1 17.13 2.22
 9 13 1 13.65 2.32
 10 13 -1 17.36 2.75
 10 13 -1 21.22 2.6
 10 13 -1 19.86 2.65
 10 -13 1 18.53 2.19
 -10 13 1 12.45 2.13
 10 13 1 18.8 2.91
 -10 13 -1 16.15 2.42
 10 13 1 15.52 2.49
 10 -13 -1 13.45 2.32
 10 13 1 13.23 2.41
 -11 13 1 45.43 3.79
 11 13 -1 49.88 4.16
 11 -13 1 36.35 3.38
 11 13 -1 44.8 4.05
 11 13 -1 48.03 4.33
 -11 13 -1 44.84 3.69
 11 13 1 41.1 3.95
 11 13 1 39.2 3.93
 11 -13 -1 38.77 3.6
 11 13 1 50.38 4.24
 12 13 -1 -0.18 1.51
 -12 13 1 -0.68 1.19
 12 -13 1 1.67 1.43
 12 13 -1 0.74 1.27
 12 13 -1 -0.79 1.31
 12 -13 -1 2.34 1.44
 12 13 1 3.02 1.75
 12 13 1 -0.49 1.26
 12 13 1 1.33 1.73
 -12 13 -1 3.22 1.47
 13 13 -1 32.03 3.93
 13 -13 1 29.29 3.6
 13 13 -1 30.89 3.8
 13 13 -1 26.7 3.66
 13 -13 -1 29.88 3.53
 13 13 1 33.81 3.84
 13 13 1 37.19 4.03
 13 13 1 35.34 3.93
 -13 13 -1 28.3 3.26
 0 -14 -1 56.88 3.58
 0 14 1 69.21 3.77
 0 14 1 64.92 3.71
 0 14 -1 61.8 3.6
 0 -14 1 61.48 3.55
 0 14 -1 65.08 3.69
 0 14 1 57.64 3.63
 1 14 -1 8.09 1.3
 -1 -14 -1 12.87 1.46
 1 14 -1 8.46 1.37
 -1 14 1 8.55 1.4
 -1 14 1 9.48 1.41
 1 -14 1 10.58 1.38
 -1 14 1 9.19 1.45
 1 14 1 10.89 1.39
 1 14 1 11.73 1.39
 1 -14 -1 9.67 1.49
 -1 14 -1 8.02 1.33
 -1 -14 1 11.56 1.48
 -1 14 -1 11.57 1.38
 1 14 1 10.75 1.45
 2 14 -1 12.49 1.46
 2 14 -1 8.87 1.4
 -2 14 1 7.87 1.32
 -2 14 1 9.52 1.45
 -2 14 1 10.85 1.48
 -2 -14 -1 7.02 1.32
 2 -14 1 10.19 1.47
 -2 14 -1 8.65 1.4
 -2 14 -1 10.41 1.32
 -2 -14 1 10.93 1.53
 2 14 1 7.82 1.43
 2 14 1 9.34 1.53
 2 -14 -1 9.37 1.47
 2 14 1 10.89 1.47
 -3 -14 -1 25.13 2.19
 -3 14 1 26.61 2.32
 3 -14 1 33.41 2.35
 -3 14 1 32.04 2.41
 3 -14 1 27.7 2.24
 3 14 -1 28.87 2.37
 -3 14 1 28.39 2.29
 -3 -14 1 34.15 2.42
 3 -14 -1 28.49 2.2
 3 14 1 22.03 2.13
 -3 14 -1 25.79 2.21
 3 14 1 26.98 2.42
 3 14 1 32.69 2.52
 -3 14 -1 30.76 2.31
 4 14 -1 1.46 0.81
 4 -14 1 1.34 0.86
 -4 14 1 0.21 0.79
 4 -14 1 0.66 0.7
 -4 14 1 1.81 0.82
 -4 -14 -1 2.01 0.89
 4 14 -1 0.73 0.65
 4 14 1 1.42 0.92
 4 -14 -1 0.85 0.69
 -4 -14 1 0.65 0.68
 -4 14 -1 2.24 0.85
 4 14 1 3.35 1.07
 4 -14 -1 3.69 1.06
 4 14 1 0.72 0.68
 -4 14 -1 2.01 0.86
 5 -14 1 8.53 1.42
 5 14 -1 10.04 1.75
 5 14 -1 7.28 1.46
 -5 14 1 7.93 1.43
 5 14 1 8.1 1.54
 5 14 1 8.74 1.62
 5 14 1 8.49 1.59
 5 -14 -1 9.55 1.52
 -5 14 -1 7.17 1.35
 5 -14 -1 8.52 1.43
 6 -14 1 0.66 0.74
 6 14 -1 1.12 0.9
 6 14 -1 -0.67 0.63
 6 14 -1 1.2 0.93
 -6 14 1 0.2 0.77
 6 -14 -1 1.27 0.82
 6 -14 -1 1.24 0.89
 6 14 1 -0.49 0.82
 -6 14 -1 1.37 0.81
 6 14 1 2.2 1
 6 14 1 1.28 0.99
 7 -14 1 52.72 3.47
 -7 14 1 47.02 3.48
 7 14 -1 50.13 3.66
 7 14 -1 42.91 3.49
 7 14 -1 50.18 3.64
 7 14 1 46.04 3.69
 7 14 1 45.88 3.6
 -7 14 -1 51.12 3.5
 7 -14 -1 47.43 3.36
 7 14 1 43.54 3.52
 8 14 -1 1.91 1.02
 -8 14 1 -0.15 0.81
 8 14 -1 -0.52 0.84
 8 -14 1 2.24 1.04
 8 14 -1 1.66 1.18
 8 14 1 2.2 1.13
 8 14 1 0.6 1.04
 -8 14 -1 2.8 1.07
 8 -14 -1 2.22 1.08
 8 14 1 1.97 1.07
 9 14 -1 16.06 2.53
 9 14 -1 14.86 2.46
 9 -14 1 13.8 2.14
 -9 14 1 19.82 2.36
 9 14 -1 15.76 2.53
 9 -14 -1 19.57 2.21
 9 14 1 19.33 2.56
 -9 14 -1 15.3 2.08
 9 14 1 16 2.43
 9 14 1 23.2 2.7
 10 14 -1 15.26 2.66
 10 14 -1 12.72 2.42
 -10 14 1 14.49 2.36
 10 14 -1 20.01 2.54
 10 -14 1 22.99 2.53
 10 -14 -1 18.41 2.3
 -10 14 -1 15.08 2.37
 10 14 1 14.35 2.54
 10 14 1 18.31 2.81
 10 14 1 16.76 2.78
 11 -14 1 1.83 1.3
 11 14 -1 1.35 1.57
 -11 14 1 1.6 1.3
 11 14 -1 0.84 1.29
 11 14 -1 2.04 1.55
 11 -14 -1 1.8 1.35
 11 14 1 1.52 1.36
 -11 14 -1 0.82 1.29
 11 14 1 4.32 1.75
 11 14 1 1.83 1.59
 12 14 -1 10.05 2.58
 -12 14 1 9.38 2.17
 12 14 -1 11.14 2.47
 12 -14 1 7.48 1.97
 12 14 -1 11.7 2.7
 12 14 1 11.6 2.71
 12 14 1 11.52 2.57
 12 -14 -1 7.92 2.13
 -12 14 -1 10.7 2.22
 12 14 1 10.12 2.36
 13 -14 1 0.95 1.75
 13 14 1 -1.34 1.57
 -13 14 -1 1.31 1.67
 13 -14 -1 -0.44 1.47
 0 -15 -1 0.2 0.57
 0 -15 1 0.31 0.67
 0 15 1 -0.6 0.56
 0 15 1 -0.03 0.63
 0 15 1 1.02 0.67
 0 15 -1 -0.62 0.58
 0 15 -1 1.44 0.72
 1 -15 1 90.74 4.68
 1 15 -1 91.94 4.82
 -1 -15 -1 85.67 4.68
 -1 15 1 94.27 4.83
 -1 15 1 82.95 4.75
 1 15 -1 91.46 4.85
 -1 15 1 82.72 4.83
 -1 15 -1 88.21 4.71
 1 -15 -1 91.34 4.71
 -1 15 -1 88.81 4.8
 -1 -15 1 89.4 4.67
 1 15 1 91.52 4.87
 1 15 1 78.67 4.66
 1 15 1 82.63 4.84
 2 15 -1 4.89 1.16
 -2 15 1 4.53 1.13
 2 15 -1 4.77 1.13
 -2 -15 -1 2.49 0.93
 -2 15 1 5.62 1.17
 -2 15 1 7.06 1.35
 2 -15 1 5.95 1.14
 2 15 1 8.12 1.41
 -2 -15 1 7.23 1.27
 2 -15 -1 7.08 1.25
 -2 15 -1 5.26 1.13
 2 15 1 7.29 1.4
 -2 15 -1 7.11 1.27
 2 15 1 4.94 1.22
 -3 15 1 9.88 1.62
 3 -15 1 8.92 1.42
 -3 15 1 11.09 1.5
 -3 15 1 9.87 1.58
 3 15 -1 10.73 1.45
 3 15 -1 9.38 1.61
 -3 -15 -1 8.34 1.4
 3 15 1 10.75 1.7
 -3 15 -1 15.14 1.68
 -3 -15 1 12.67 1.48
 3 15 1 9.41 1.64
 3 -15 -1 11.47 1.4
 -3 15 -1 11.55 1.47
 3 15 1 9.38 1.59
 4 15 -1 58.08 3.98
 -4 -15 -1 65.39 3.85
 4 -15 1 51.71 3.57
 -4 15 1 60.19 3.77
 4 15 -1 70.45 4.14
 -4 15 1 63.03 3.93
 4 15 1 63.82 4.01
 4 -15 -1 63.45 3.79
 4 -15 -1 59.2 3.74
 -4 -15 1 63.99 3.79
 4 15 1 65.41 4.05
 -4 15 -1 60.85 3.86
 4 15 1 61.64 4.02
 -4 15 -1 59.3 3.79
 5 15 -1 9.29 1.61
 -5 15 1 8.4 1.5
 5 15 -1 8.2 1.57
 5 -15 1 11.52 1.55
 -5 15 -1 10.89 1.65
 5 -15 -1 10.32 1.65
 5 15 1 10.86 1.81
 5 15 1 7.35 1.56
 5 15 1 12.87 1.69
 6 15 -1 52.56 4.11
 -6 15 1 80.34 4.38
 6 -15 1 65.77 4.02
 6 15 -1 67.46 4.34
 6 15 -1 56.26 4.05
 6 -15 -1 62.04 4
 6 15 1 72.94 4.56
 6 15 1 67.11 4.29
 -6 15 -1 63.43 4.09
 6 15 1 59.85 4.29
 7 15 -1 0.88 0.96
 -7 15 1 0.2 0.79
 7 -15 1 -0.68 0.82
 7 15 -1 0.89 0.97
 7 15 -1 1.47 1.02
 -7 15 -1 2.65 1.08
 7 15 1 0.45 1.11
 7 15 1 0.78 0.91
 7 15 1 1.12 1.01
 7 -15 -1 0.73 0.92
 8 15 -1 41.51 3.46
 -8 15 1 34.78 3.05
 8 15 -1 31.4 3.2
 8 15 -1 42.39 3.54
 8 -15 1 38.89 3.14
 8 15 1 40.89 3.56
 8 15 1 35.28 3.39
 8 -15 -1 38.51 3.15
 -8 15 -1 36.98 3.18
 8 15 1 39.98 3.42
 9 -15 1 16.94 2.03
 9 15 -1 14.77 2.44
 9 15 -1 13.33 2.41
 9 15 -1 14.01 2.4
 -9 15 1 15.58 2.14
 9 15 1 16.53 2.59
 9 15 1 15.65 2.59
 9 -15 -1 12.44 2.13
 -9 15 -1 14.2 2.23
 9 15 1 14.36 2.55
 10 -15 1 16.92 2.56
 10 15 -1 17.74 2.91
 10 15 -1 20.59 2.75
 -10 15 1 18.75 2.51
 10 15 -1 10.71 2.35
 10 -15 -1 17.79 2.33
 10 15 1 22.81 2.98
 10 15 1 19.41 2.94
 -10 15 -1 19.37 2.44
 10 15 1 16.38 2.75
 11 15 -1 33.36 3.6
 11 -15 1 41.71 3.62
 11 15 -1 39.83 4.08
 11 15 -1 35.76 3.81
 -11 15 1 46.27 3.89
 11 -15 -1 32.63 3.39
 11 15 1 36.47 3.74
 -11 15 -1 38.33 3.62
 11 15 1 30.17 3.58
 11 15 1 32.38 3.63
 12 15 -1 2.59 1.72
 12 15 -1 0.28 1.73
 12 -15 1 2.07 1.57
 -12 15 1 2.72 1.78
 12 15 -1 0.25 1.7
 12 15 1 4.6 2.1
 12 15 1 1.16 1.75
 12 15 1 -0.29 1.46
 12 -15 -1 0.57 1.41
 -12 15 -1 2.21 1.64
 0 16 -1 44.13 3.12
 0 16 1 52.7 3.38
 0 16 1 47.74 3.29
 0 16 1 46.9 3.18
 0 -16 1 44.08 3.03
 0 -16 -1 48.05 3.17
 0 16 -1 42.57 3.05
 1 -16 1 1.45 0.73
 -1 -16 -1 1.73 0.86
 -1 16 1 2.02 0.93
 1 16 -1 1.81 0.83
 1 16 -1 1.34 0.8
 -1 16 1 1.45 0.88
 -1 16 1 2.67 0.93
 1 -16 -1 3.49 1.03
 -1 16 -1 2.81 0.95
 1 16 1 2.14 0.96
 1 16 1 1.66 0.86
 1 16 1 2.03 0.83
 -1 16 -1 2.23 0.86
 -1 -16 1 1.62 0.83
 -2 16 1 12.86 1.71
 2 16 -1 18.59 2
 2 16 -1 16.87 1.86
 2 -16 1 17.03 1.72
 -2 16 1 23.18 2.03
 -2 -16 -1 18.5 1.83
 -2 16 1 17.4 1.96
 -2 -16 1 17.14 1.81
 2 16 1 18 1.95
 2 16 1 20.93 2.08
 2 -16 -1 23.8 2.02
 -2 16 -1 19.92 1.96
 2 16 1 18.62 2.03
 -2 16 -1 17.08 1.84
 3 16 -1 11.44 1.74
 3 16 -1 12.19 1.63
 -3 -16 -1 9.93 1.63
 -3 16 1 7.19 1.46
 -3 16 1 9.77 1.65
 3 -16 1 9.69 1.52
 -3 16 1 13.72 1.74
 -3 16 -1 12.89 1.65
 -3 -16 1 10.86 1.69
 3 -16 -1 9.78 1.55
 3 16 1 13.97 1.84
 -3 16 -1 11.5 1.77
 3 16 1 7.94 1.56
 3 16 1 10.79 1.71
 4 16 -1 2.04 0.95
 4 16 -1 2.98 1.16
 4 -16 1 2.55 0.94
 -4 16 1 2.73 1.1
 -4 16 1 1.42 0.88
 -4 -16 -1 -0.2 0.66
 4 -16 -1 2.19 0.94
 -4 16 -1 1.59 0.95
 4 16 1 2.58 1.09
 -4 16 -1 3.22 1.04
 4 16 1 2.44 1.04
 4 16 1 1.33 0.93
 -4 -16 1 2.24 0.98
 5 -16 1 23.79 2.31
 -5 16 1 30.41 2.53
 -5 -16 -1 25.43 2.44
 5 16 -1 30.2 2.72
 5 16 -1 30.62 2.74
 5 16 1 29.54 2.69
 5 16 1 25.82 2.68
 -5 16 -1 30.51 2.59
 -5 -16 1 31.63 2.6
 5 16 1 29.77 2.67
 5 -16 -1 25.33 2.37
 6 -16 1 3.85 1.23
 6 16 -1 5.82 1.48
 6 16 -1 4.8 1.3
 6 16 -1 3.53 1.26
 -6 16 1 7.23 1.53
 6 -16 -1 5.69 1.43
 6 16 1 7.05 1.54
 6 16 1 4.32 1.41
 6 16 1 4.42 1.39
 -6 16 -1 5.12 1.27
 7 -16 1 7.07 1.44
 7 16 -1 14.61 2.31
 -7 16 1 12.16 1.96
 7 16 -1 9.53 1.91
 7 16 -1 6.38 1.64
 -7 16 -1 9.2 1.8
 7 -16 -1 10.85 1.81
 7 16 1 10.76 1.99
 7 16 1 10.05 2.07
 7 16 1 4.78 1.61
 8 16 -1 -0.46 0.99
 8 16 -1 0.46 0.96
 8 -16 1 0.89 1.11
 -8 16 1 -0.15 0.91
 8 16 -1 1.44 1.29
 -8 16 -1 -0.01 1.01
 8 -16 -1 0.13 0.89
 8 16 1 0.59 1.18
 8 16 1 1.05 1.2
 8 16 1 -1.4 1.03
 9 16 -1 11.1 2.25
 9 16 -1 9.59 2.14
 9 16 -1 9.28 2.17
 -9 16 1 11.17 2.1
 9 -16 1 8.43 1.8
 9 16 1 10.57 2.28
 9 -16 -1 10.21 1.97
 -9 16 -1 9.64 1.94
 9 16 1 8.89 2.24
 9 16 1 13.2 2.4
 -10 16 1 8.83 1.99
 10 -16 1 8.38 1.87
 10 16 -1 13.19 2.58
 10 16 -1 14.13 2.57
 10 16 -1 11.42 2.36
 10 16 1 14.9 2.61
 10 -16 -1 10.14 2.15
 10 16 1 13.92 2.68
 -10 16 -1 13.27 2.26
 10 16 1 7.65 2.15
 -11 16 1 2.79 1.63
 11 16 -1 3 1.91
 11 -16 1 3.81 1.49
 11 16 -1 3.63 1.86
 11 16 -1 2.18 1.63
 -11 16 -1 4.17 1.9
 11 16 1 3.97 1.79
 11 -16 -1 2.49 1.55
 11 16 1 5.73 2.05
 11 16 1 1.02 1.56
 12 -16 1 10.85 2.57
 -12 16 1 11.76 2.4
 -12 16 -1 15.27 2.73
 12 -16 -1 14.3 2.61
 12 16 1 9.88 2.57
 0 17 1 -0.16 0.72
 0 17 1 1.32 0.9
 0 17 -1 0.7 0.76
 0 -17 -1 1.73 0.81
 0 -17 1 0.19 0.63
 0 17 -1 1.59 0.85
 0 17 1 0.5 0.69
 1 -17 1 50.88 3.32
 -1 17 1 48.07 3.36
 1 17 -1 55.1 3.52
 1 17 -1 49.52 3.44
 -1 -17 -1 50.9 3.39
 -1 17 1 48.3 3.48
 -1 17 1 49.67 3.53
 1 17 1 49.6 3.49
 1 17 1 49.24 3.52
 -1 17 -1 46.26 3.41
 1 -17 -1 53.38 3.42
 1 17 1 49.39 3.44
 -1 17 -1 51.39 3.43
 -1 -17 1 53.82 3.38
 2 17 -1 34.8 2.83
 -2 17 1 36.02 2.72
 -2 17 1 32.48 2.72
 -2 17 1 33.63 2.82
 2 17 -1 33.33 2.7
 2 -17 1 32.33 2.55
 -2 -17 -1 31.82 2.56
 2 17 1 31.8 2.74
 2 -17 -1 32.5 2.59
 2 17 1 36.3 2.95
 2 17 1 35.95 2.87
 -2 17 -1 39.73 2.82
 -2 17 -1 32.79 2.69
 -2 -17 1 30.91 2.55
 3 17 -1 10.28 1.81
 -3 17 1 13.36 1.77
 -3 17 1 9.67 1.76
 3 17 -1 13.12 1.72
 -3 17 1 11.1 1.83
 3 -17 1 11.8 1.61
 -3 -17 -1 11.26 1.8
 3 17 1 12.58 1.91
 3 -17 -1 10.87 1.74
 -3 -17 1 8.45 1.51
 3 17 1 13.7 1.86
 -3 17 -1 13.38 1.74
 3 17 1 10.23 1.85
 -3 17 -1 14.61 1.77
 4 17 -1 32.75 2.92
 4 17 -1 35.05 2.97
 4 17 -1 31.18 2.71
 -4 17 1 36.28 2.85
 -4 17 1 37.19 2.98
 4 -17 1 36.34 2.72
 -4 -17 -1 32.08 2.74
 -4 17 -1 30.93 2.71
 -4 17 -1 34.29 2.83
 -4 -17 1 32.6 2.69
 4 -17 -1 31.99 2.71
 4 17 1 36.38 3.03
 4 17 1 31.03 2.75
 4 17 1 36.49 3.06
 -5 17 1 3 1.17
 -5 -17 -1 5.73 1.4
 5 17 -1 5.26 1.51
 5 17 -1 5.06 1.45
 5 -17 1 6.44 1.41
 -5 -17 1 3.76 1.19
 5 17 1 4.98 1.48
 5 17 1 5.6 1.5
 5 -17 -1 7.05 1.44
 -5 17 -1 5.83 1.34
 -6 -17 -1 29.24 2.73
 6 17 -1 29 2.78
 6 17 -1 38.81 3.25
 -6 17 1 30.31 2.76
 6 -17 1 29.42 2.6
 6 17 -1 30.14 2.97
 6 -17 -1 29.85 2.71
 -6 -17 1 31.32 2.77
 6 17 1 31.29 2.98
 6 17 1 26.7 2.79
 6 17 1 28.33 2.91
 -6 17 -1 24.97 2.57
 7 -17 1 1.02 0.87
 7 17 -1 0.15 0.9
 7 17 -1 1.41 1.19
 7 17 -1 -1.09 1.13
 -7 17 1 -0.13 0.75
 -7 17 -1 -1.03 0.81
 7 17 1 -1.05 0.85
 7 17 1 0.2 1.08
 7 -17 -1 0.03 0.87
 7 17 1 -1.2 0.91
 8 -17 1 25.53 2.57
 -8 17 1 26.42 2.71
 8 17 -1 31.71 3.23
 8 17 -1 28.29 3.21
 8 17 -1 21.51 2.99
 8 17 1 32.89 3.35
 8 -17 -1 28.38 2.79
 -8 17 -1 32.56 2.94
 8 17 1 26.81 3
 8 17 1 24.79 3.12
 9 17 -1 15.04 2.71
 -9 17 1 14.15 2.38
 9 17 -1 14.95 2.74
 9 17 -1 16.2 2.73
 9 -17 1 13.12 2.22
 9 -17 -1 19.54 2.47
 9 17 1 15.12 2.7
 9 17 1 14.38 2.64
 9 17 1 13.19 2.49
 -9 17 -1 14.16 2.33
 -10 17 1 10.67 2.19
 10 -17 1 8.47 1.96
 10 17 -1 4.54 2.09
 10 17 -1 10.36 2.34
 10 17 -1 13.02 2.49
 10 -17 -1 4.88 1.53
 10 17 1 10.64 2.41
 10 17 1 10 2.39
 10 17 1 9.43 2.37
 -10 17 -1 8.24 2.05
 11 17 -1 18.21 3.21
 11 17 -1 25.57 3.39
 -11 17 1 19.67 3.03
 11 -17 1 22.23 3.02
 11 17 1 24.55 3.32
 -11 17 -1 22.92 3.12
 11 17 1 25.58 3.52
 11 17 1 24.76 3.67
 11 -17 -1 19.11 2.96
 0 -18 -1 77.83 4.5
 0 18 -1 80.59 4.64
 0 18 1 77.03 4.62
 0 18 1 75.24 4.57
 0 -18 1 68.6 4.31
 0 18 -1 72.48 4.51
 0 18 1 75.45 4.76
 1 18 -1 1.04 0.87
 1 -18 1 1.1 0.85
 -1 18 1 -0.71 0.79
 -1 -18 -1 1.12 0.89
 1 18 -1 0.1 0.83
 -1 18 1 2.7 0.99
 -1 18 1 0.1 0.74
 -1 -18 1 2.96 1.02
 1 -18 -1 1.91 0.92
 -1 18 -1 2.41 0.99
 1 18 1 0.86 0.9
 1 18 1 1.21 0.82
 -1 18 -1 2.25 1.03
 1 18 1 0.51 0.76
 -2 18 1 35.73 2.95
 2 18 -1 32.54 2.76
 -2 18 1 28.49 2.71
 2 -18 1 33 2.58
 -2 -18 -1 32.81 2.74
 -2 18 1 34.41 2.75
 2 18 -1 32.37 2.8
 2 18 -1 32.95 2.75
 2 18 1 32.62 2.78
 2 18 1 27.18 2.7
 2 18 1 28.87 2.7
 -2 18 -1 26.84 2.57
 2 -18 -1 32.74 2.63
 -2 18 -1 31.64 2.68
 -2 18 -1 37.73 2.87
 -2 -18 1 30.71 2.58
 3 -18 1 5.39 1.27
 -3 -18 -1 6.19 1.36
 3 18 -1 7.25 1.56
 -3 18 1 6.31 1.47
 -3 18 1 10.65 1.85
 -3 18 1 4.97 1.37
 3 18 -1 6.87 1.52
 3 18 -1 5.75 1.34
 3 18 1 5.94 1.48
 -3 18 -1 7.15 1.57
 -3 18 -1 6.49 1.4
 -3 -18 1 4.13 1.15
 3 18 1 5.21 1.41
 3 -18 -1 8.34 1.55
 -3 18 -1 7.33 1.57
 3 18 1 8.6 1.8
 -4 18 1 13.63 1.84
 4 18 -1 11.05 1.91
 4 18 -1 13.38 2.13
 -4 -18 -1 15.14 1.89
 -4 18 1 14.66 2.21
 4 18 -1 14.66 2.34
 4 -18 1 14.9 1.84
 -4 18 -1 15.6 1.99
 4 18 1 13.78 2.14
 -4 18 -1 15.41 1.97
 4 18 1 16.59 2.16
 -4 -18 1 17.08 1.94
 4 -18 -1 14.11 1.82
 4 18 1 17.28 2.14
 5 18 -1 17.78 2.31
 -5 18 1 22.35 2.34
 -5 -18 -1 22.61 2.31
 5 -18 1 18.88 2.2
 5 18 -1 22.75 2.52
 5 18 1 23.8 2.59
 5 18 1 17.17 2.62
 5 18 1 16.68 2.22
 -5 -18 1 18.27 2.14
 -5 18 -1 17.49 2.17
 5 -18 -1 21.23 2.2
 6 18 -1 0.58 1
 6 -18 1 -0.54 0.94
 6 18 -1 0.99 1.25
 6 18 -1 1.16 1.3
 -6 18 1 0.86 0.94
 -6 -18 -1 0.96 0.9
 6 18 1 2.69 1.22
 -6 -18 1 -0.02 0.95
 -6 18 -1 0.46 0.87
 6 18 1 0.69 1.08
 6 18 1 0.33 1.22
 6 -18 -1 -0.2 0.83
 7 18 -1 9.55 2.03
 7 -18 1 11.54 1.98
 7 18 -1 10.99 2.19
 -7 18 1 15.46 2.1
 7 18 -1 6.34 2.04
 -7 -18 -1 10.85 1.94
 -7 18 -1 12.69 2.14
 -7 -18 1 15.93 2.33
 7 18 1 14.72 2.49
 7 -18 -1 10.3 1.87
 7 18 1 12.37 2.31
 7 18 1 7.4 1.97
 8 -18 1 -0.01 0.98
 8 18 -1 0.41 1.29
 8 18 -1 0.88 1.3
 8 18 -1 1.5 1.22
 -8 18 1 0.38 1.01
 8 -18 -1 -0.43 1.15
 8 18 1 1.28 1.36
 8 18 1 0.72 1.17
 -8 18 -1 0.35 1.12
 8 18 1 1.04 1.29
 -9 18 1 7.82 1.91
 9 18 -1 5.32 1.78
 9 -18 1 11.4 2.17
 9 18 -1 9.94 2.23
 9 18 -1 6.48 2.08
 9 -18 -1 9.65 2.15
 9 18 1 7.74 2.23
 9 18 1 6.59 2.1
 9 18 1 9.91 2.48
 -9 18 -1 7.81 1.88
 10 -18 1 10.85 2.25
 10 18 -1 13.09 2.85
 10 18 -1 8.79 2.43
 -10 18 1 10.99 2.32
 10 18 -1 11.68 2.47
 10 18 1 12.2 2.57
 10 -18 -1 8.66 1.96
 -10 18 -1 16.33 2.62
 10 18 1 15.25 2.93
 10 18 1 5.4 2.1
 -11 18 1 1.16 1.49
 -11 18 -1 1.68 1.55
 11 -18 -1 -0.75 1.48
 0 19 1 0.21 0.83
 0 -19 1 0.87 0.79
 0 19 1 0.47 0.86
 0 19 -1 2.57 1.11
 0 19 1 0.74 1.04
 0 19 -1 1.69 0.98
 0 19 -1 0.1 0.72
 0 -19 -1 0.75 0.87
 1 -19 1 58.36 3.72
 -1 -19 -1 48.78 3.6
 1 19 -1 55.98 3.87
 1 19 -1 52.94 3.78
 1 19 -1 52.1 3.74
 -1 19 1 54.6 3.82
 -1 19 1 54.08 3.81
 -1 19 1 51.34 3.85
 1 19 1 50.11 3.8
 -1 19 -1 51.52 3.7
 1 19 1 60.88 4.05
 -1 -19 1 53.78 3.67
 1 19 1 54.14 3.82
 -1 19 -1 45.48 3.65
 1 -19 -1 57.97 3.75
 -1 19 -1 59.86 3.94
 -2 19 1 12.99 1.75
 -2 -19 -1 10.21 1.74
 -2 19 1 7.73 1.7
 2 -19 1 9.45 1.7
 2 19 -1 10.29 1.86
 -2 19 1 8.92 1.76
 2 19 -1 10.29 1.79
 2 19 -1 10.93 1.9
 -2 19 -1 5.49 1.44
 2 19 1 9.29 1.71
 2 19 1 8.69 1.74
 -2 19 -1 12.94 2.02
 2 -19 -1 8.44 1.61
 2 19 1 11.56 1.84
 -2 19 -1 11.09 1.94
 -2 -19 1 10.03 1.78
 -3 19 1 11.94 2.03
 -3 19 1 19.63 2.38
 3 19 -1 14.54 2.3
 3 19 -1 12.78 2.2
 3 -19 1 10.43 1.84
 -3 -19 -1 18.94 2.04
 3 19 -1 22.85 2.35
 -3 19 1 19.62 2.33
 3 19 1 17.63 2.32
 -3 19 -1 17.6 2.13
 3 -19 -1 14.66 1.86
 3 19 1 19.68 2.24
 -3 19 -1 17.57 2.26
 3 19 1 17.66 2.2
 -3 19 -1 16.41 2.05
 -3 -19 1 17.29 1.96
 4 19 -1 13.49 2.25
 -4 -19 -1 15.1 2.11
 -4 19 1 18.97 2.24
 -4 19 1 17.46 2.27
 4 19 -1 19.3 2.26
 4 19 -1 22.99 2.58
 4 -19 1 18.07 2.16
 -4 19 -1 19.01 2.34
 4 19 1 19.03 2.31
 4 -19 -1 18.33 2.18
 -4 19 -1 20.45 2.33
 4 19 1 21.06 2.46
 4 19 1 19.29 2.49
 -4 -19 1 17.01 2.15
 -5 -19 -1 7.79 1.66
 5 19 -1 5.99 1.59
 5 19 -1 7.44 1.8
 -5 19 1 7.86 1.7
 5 -19 1 8 1.71
 5 19 -1 7.17 1.73
 5 19 1 9.84 1.85
 5 -19 -1 7.31 1.67
 5 19 1 8.55 1.92
 5 19 1 5.58 1.65
 -5 19 -1 8.36 1.71
 -5 -19 1 7.9 1.66
 6 19 -1 23.04 2.84
 -6 19 1 21.64 2.47
 -6 -19 -1 17.08 2.26
 6 -19 1 20.24 2.28
 6 19 -1 21.21 2.63
 -6 -19 1 22.05 2.53
 6 19 1 18.04 2.82
 6 19 1 20.15 2.48
 -6 19 -1 20.72 2.51
 6 -19 -1 17.5 2.18
 6 19 1 19.95 2.58
 7 -19 1 0.98 1.06
 7 19 -1 0.86 1.39
 -7 -19 -1 -0.41 1.02
 7 19 -1 2.33 1.3
 -7 19 1 1.36 1.1
 7 19 -1 -1.9 1.03
 -7 19 -1 -0.53 0.86
 7 19 1 -1.35 1.04
 7 19 1 -1.45 0.98
 7 -19 -1 -1.45 0.93
 7 19 1 -0.51 1.14
 -7 -19 1 0.82 1.24
 8 -19 1 10.04 1.93
 8 19 -1 11.85 2.39
 -8 19 1 8.22 1.84
 8 19 -1 8.1 2.11
 -8 -19 -1 6.83 1.85
 8 19 -1 9.94 2.21
 8 -19 -1 8.91 1.99
 8 19 1 11.16 2.34
 8 19 1 9.89 2.21
 -8 -19 1 10.07 2
 -8 19 -1 7.96 1.95
 8 19 1 8 2.11
 -9 19 1 4.76 1.62
 9 19 -1 4.59 1.92
 9 19 -1 4.61 1.82
 9 19 -1 1.86 1.7
 -9 19 -1 4.98 1.68
 9 19 1 1.12 1.51
 9 -19 -1 4.66 1.65
 9 19 1 0.18 1.41
 9 19 1 6.37 1.98
 -10 19 1 3.7 1.89
 10 -19 -1 3.71 1.55
 -10 19 -1 1.43 1.64
 10 19 1 1.34 1.77
 0 20 1 92.27 5.61
 0 -20 -1 90.25 5.21
 0 20 -1 85.44 5.21
 0 20 1 94.27 5.56
 0 -20 1 80.21 5.04
 0 20 1 91.1 5.37
 0 20 -1 95.64 5.6
 0 20 -1 84.27 5.36
 1 20 -1 0.91 0.96
 1 20 -1 1.27 1.03
 -1 20 1 1.48 1.12
 1 -20 1 0.2 1.09
 1 20 -1 0.11 1.03
 -1 20 1 0.25 0.88
 -1 -20 -1 0.01 0.94
 -1 20 1 1.65 1.08
 -1 -20 1 1.14 1.14
 1 20 1 1.49 1.09
 -1 20 -1 2.24 1.28
 -1 20 -1 0.37 0.95
 -1 20 -1 -0.55 0.86
 1 20 1 0.05 0.97
 1 -20 -1 0.6 0.85
 1 20 1 0.36 0.87
 -2 20 1 34.88 3.11
 2 20 -1 34.46 3.03
 2 20 -1 35.73 3.22
 -2 -20 -1 29.81 2.8
 -2 20 1 31.92 3
 -2 20 1 33.48 3.09
 2 -20 1 30.83 2.8
 2 20 -1 35.09 3.16
 2 20 1 37.69 3.25
 2 20 1 34.39 3.08
 -2 20 -1 41.15 3.29
 -2 20 -1 36.35 3.07
 -2 -20 1 36.11 2.9
 2 -20 -1 32.65 2.79
 -2 20 -1 41.37 3.36
 2 20 1 30.14 3.1
 3 20 -1 10.49 2
 -3 20 1 10.43 1.85
 -3 20 1 10.08 2.02
 -3 20 1 9.31 1.97
 3 20 -1 10.79 2.12
 3 -20 1 10.83 1.79
 3 20 -1 8.38 1.95
 -3 -20 -1 6.14 1.57
 -3 -20 1 10.71 1.86
 -3 20 -1 8.65 1.84
 3 20 1 13.29 2.12
 3 -20 -1 6.3 1.57
 -3 20 -1 11.31 1.94
 3 20 1 10.09 2.02
 -3 20 -1 8.04 1.89
 3 20 1 8.99 1.86
 4 20 -1 6.95 1.72
 4 -20 1 6.89 1.57
 -4 20 1 6.19 1.59
 -4 20 1 9.45 2.07
 -4 -20 -1 11.21 1.9
 4 20 -1 7.06 1.82
 4 20 -1 6.88 1.77
 -4 20 -1 7.92 1.83
 4 20 1 10.56 2.02
 -4 -20 1 9.37 1.69
 -4 20 -1 10.09 1.9
 4 -20 -1 8.69 1.74
 4 20 1 9.87 2
 4 20 1 11.48 2.26
 5 20 -1 22.9 2.77
 5 20 -1 20.84 2.5
 5 -20 1 17.82 2.34
 -5 20 1 19.06 2.34
 -5 -20 -1 22.73 2.57
 5 20 -1 20.56 2.73
 5 20 1 18.65 2.47
 5 20 1 23.41 2.83
 5 -20 -1 19.38 2.34
 -5 -20 1 16.46 2.31
 5 20 1 24.19 2.73
 -5 20 -1 19.59 2.35
 6 -20 1 1.83 1.02
 6 20 -1 1.6 1.32
 -6 20 1 1.27 1.18
 6 20 -1 3.69 1.54
 -6 -20 -1 2.32 1.28
 6 20 -1 3.41 1.57
 6 -20 -1 -0.07 1
 6 20 1 3.13 1.44
 -6 20 -1 -0.09 1.02
 6 20 1 2.26 1.41
 6 20 1 1.66 1.17
 7 20 -1 24.77 3.1
 -7 20 1 27.56 2.89
 -7 -20 -1 21.22 2.56
 7 20 -1 21.82 2.74
 7 20 1 25.72 3.18
 7 20 1 26.38 3.16
 7 -20 -1 25.58 2.66
 -7 20 -1 23.3 2.74
 8 20 -1 -0.62 1.42
 8 20 -1 4.43 1.86
 8 20 -1 -0.12 1.25
 -8 20 1 -0.56 1.04
 -8 -20 -1 1.65 1.55
 -8 20 -1 1.29 1.22
 8 20 1 1 1.48
 8 20 1 0.54 1.28
 8 -20 -1 -1.44 1.29
 8 20 1 0.57 1.59
 -9 -20 -1 11.99 2.44
 9 20 -1 8.51 2.29
 -9 20 1 6.58 2.13
 9 -20 -1 9.74 2.23
 9 20 1 11.49 2.77
 -9 20 -1 7.38 1.98
 0 -21 -1 -0.11 0.94
 0 21 1 2.57 1.21
 0 -21 1 2.45 1.05
 0 21 1 1.82 1.17
 0 21 -1 0.45 0.95
 0 21 1 0.93 1.35
 0 21 -1 1.91 1.14
 0 21 -1 1.23 1.25
 -1 -21 -1 36.25 3.09
 1 -21 1 32.79 2.93
 -1 21 1 30.32 3.02
 1 21 -1 31.84 3.13
 -1 21 1 36.2 3.29
 -1 21 1 38.46 3.29
 1 21 -1 34.62 3.28
 1 21 -1 36.93 3.15
 -1 21 -1 30.59 2.94
 -1 21 -1 31.32 3.1
 1 21 1 39.4 3.34
 -1 -21 1 32.83 2.88
 -1 21 -1 34.3 3.2
 1 21 1 37.93 3.42
 1 21 1 32.68 3.05
 1 -21 -1 33.35 2.97
 2 21 -1 0.51 1.15
 2 21 -1 1.97 1.11
 -2 21 1 2.99 1.26
 -2 21 1 0.85 1.13
 -2 -21 -1 2.82 1.25
 -2 21 1 2.35 1.45
 2 21 -1 2.92 1.42
 -2 21 -1 3.07 1.33
 2 21 1 4.46 1.42
 2 -21 -1 2.53 1.25
 2 21 1 1.82 1.28
 -2 21 -1 1.76 1.36
 -2 21 -1 6.3 1.55
 2 21 1 0.5 1.15
 3 21 -1 5.23 1.64
 -3 21 1 8.44 1.95
 3 21 -1 12.8 2.27
 -3 21 1 11.92 2.05
 -3 -21 -1 10.39 1.98
 3 21 -1 7.29 1.72
 3 21 1 12.25 2.24
 3 -21 -1 11.63 2.03
 -3 21 -1 10.03 1.88
 3 21 1 9.13 1.88
 -3 21 -1 9.09 1.97
 -3 21 -1 14.52 2.41
 3 21 1 9.59 2.05
 4 21 -1 5.88 2.24
 -4 21 1 8.12 1.91
 -4 -21 -1 10.06 1.89
 4 21 -1 6.21 1.82
 -4 21 1 9.93 2.01
 4 21 -1 6.77 1.86
 -4 21 -1 10.11 2.36
 4 21 1 5.81 1.66
 4 -21 -1 9.07 1.94
 4 21 1 6.76 1.87
 -4 21 -1 9.87 2.1
 4 21 1 6.05 1.78
 5 21 -1 2.59 1.51
 5 21 -1 2.27 1.35
 -5 21 1 3.3 1.32
 5 21 -1 2.03 1.43
 -5 -21 -1 5.31 1.67
 5 -21 -1 -0.26 1.01
 5 21 1 3.34 1.57
 5 21 1 2.57 1.51
 5 21 1 1.98 1.29
 -5 21 -1 2.66 1.26
 6 21 -1 13.79 2.76
 6 21 -1 7.98 2.06
 -6 21 1 6.53 1.83
 -6 -21 -1 10.51 2.13
 6 21 -1 11.39 2.15
 6 21 1 10.07 2.34
 6 -21 -1 11.16 2.07
 -6 21 -1 10.24 2.08
 6 21 1 8.88 2.08
 6 21 1 6.88 2.05
 -7 -21 -1 -0.84 1.1
 7 21 -1 -0.09 1.37
 7 21 -1 1.01 1.36
 -7 21 1 -2.06 1.09
 7 21 -1 1.89 1.46
 7 21 1 -1.27 1.05
 -7 21 -1 -0.04 1.19
 7 21 1 1.39 1.39
 7 21 1 0.7 1.5
 7 -21 -1 1.58 1.27
 -8 -21 -1 6.27 1.99
 8 21 -1 5.28 1.95
 -8 21 1 8.96 2.27
 -8 21 -1 9.79 2.27
 8 -21 -1 7.22 2.2
 8 21 1 9.25 2.48
 0 22 1 41.55 3.65
 0 22 -1 37.78 3.34
 0 22 -1 33.91 3.38
 0 -22 -1 39.2 3.36
 0 22 1 35.49 3.45
 0 22 1 32.31 3.2
 0 22 -1 42.64 3.64
 1 22 -1 8.14 1.94
 -1 22 1 8.2 1.85
 -1 -22 -1 5.01 1.58
 1 22 -1 7.46 1.91
 1 22 -1 7.18 1.79
 -1 22 1 5.77 1.72
 -1 22 1 8.4 1.97
 1 22 1 3.71 1.76
 -1 22 -1 9.59 2.04
 1 -22 -1 6.24 1.72
 -1 22 -1 10.66 2.15
 -1 22 -1 9.16 1.93
 1 22 1 6.93 1.72
 1 22 1 4.28 1.51
 2 22 -1 17.28 2.4
 -2 22 1 18.45 2.43
 -2 22 1 21.01 2.78
 -2 -22 -1 19.26 2.43
 2 22 -1 15.38 2.53
 -2 22 1 20.07 2.52
 2 22 -1 19.02 2.57
 -2 22 -1 24.56 2.69
 2 -22 -1 18.68 2.36
 2 22 1 14.75 2.49
 -2 22 -1 19.29 2.57
 2 22 1 14.64 2.47
 2 22 1 15.49 2.56
 -2 22 -1 17.16 2.56
 3 22 -1 14.2 2.53
 -3 22 1 11.15 2.32
 -3 22 1 17.04 2.31
 -3 -22 -1 13.67 2.34
 3 22 -1 11.71 2.21
 3 22 -1 14.22 2.39
 3 22 1 15.64 2.55
 3 22 1 12.91 2.51
 -3 22 -1 15.67 2.38
 -3 22 -1 14.38 2.53
 3 -22 -1 16.89 2.49
 3 22 1 11.85 2.33
 4 22 -1 6.27 1.99
 -4 22 1 2.48 1.4
 4 22 -1 5.18 1.63
 4 22 -1 7.56 1.86
 -4 22 1 4.98 1.72
 -4 -22 -1 7.11 1.85
 4 22 1 7.62 1.91
 4 22 1 5.17 1.68
 -4 22 -1 7.18 1.95
 4 -22 -1 7.59 1.9
 4 22 1 6.34 1.91
 -4 22 -1 6.66 1.8
 5 22 -1 17.1 2.74
 5 22 -1 13.18 2.33
 5 22 -1 13.43 2.62
 -5 -22 -1 18.46 2.31
 -5 22 1 15.32 2.48
 5 22 1 16.54 2.65
 5 22 1 24.05 3.09
 5 22 1 18.98 2.97
 -5 22 -1 21.22 2.48
 5 -22 -1 13.53 2.37
 6 22 -1 3.27 1.59
 6 22 -1 3.81 1.75
 -6 22 1 3.88 1.46
 6 22 -1 5.11 1.78
 6 22 1 3.74 1.74
 6 22 1 1.99 1.42
 -6 22 -1 1.55 1.34
 6 22 1 2.77 1.8
 -7 22 1 8.89 2.3
 7 22 -1 13.19 2.49
 7 22 1 7.92 2.25
 7 22 1 11.52 2.71
 -7 22 -1 14.3 2.52
 0 23 1 1.37 1.33
 0 23 -1 -0.13 1.26
 0 23 -1 0.41 1.26
 0 23 1 0.08 1.1
 0 23 1 0.77 1.36
 0 23 -1 1.02 1.29
 1 23 -1 8.4 1.97
 1 23 -1 11.92 2.37
 1 23 -1 7.82 2.04
 -1 23 1 6.31 1.8
 -1 23 1 9.65 2.14
 -1 23 1 10.77 2.19
 1 23 1 10.86 2.23
 -1 23 -1 11.81 2.38
 -1 23 -1 12.22 2.28
 -1 23 -1 9.64 1.99
 1 23 1 5.76 1.85
 1 23 1 9.47 2.18
 -2 23 1 1.16 1.29
 2 23 -1 1.17 1.23
 2 23 -1 0.38 1.22
 -2 23 1 0.04 1.24
 -2 23 1 -0.73 1.17
 2 23 -1 0.52 1.19
 -2 23 -1 -0.28 1.25
 -2 23 -1 0.21 1.23
 2 23 1 0.18 1.26
 -2 23 -1 2.06 1.28
 2 23 1 0.49 1.17
 2 23 1 0.66 1.38
 3 23 -1 8.57 1.88
 3 23 -1 6.02 1.75
 -3 23 1 11.85 2.39
 -3 23 1 7.39 1.86
 3 23 -1 10.35 2.14
 3 23 1 6.16 2.02
 3 23 1 8.78 2
 -3 23 -1 5.84 1.77
 3 23 1 4.75 1.74
 -3 23 -1 8.36 1.99
 4 23 -1 9.01 2.04
 -4 23 1 8.2 2.05
 -4 23 1 6.84 1.96
 4 23 -1 6.85 1.91
 4 23 -1 8.87 2.38
 4 23 1 5.99 1.78
 -4 23 -1 7.24 1.96
 -4 23 -1 7.22 2.01
 4 23 1 5.4 1.94
 4 23 1 10.58 2.15
 5 23 -1 0.2 1.41
 5 23 -1 2.21 1.6
 5 23 -1 -0.12 1.48
 -5 23 1 1.31 1.2
 5 23 1 -0.2 1.32
 5 23 1 0.31 1.11
 -5 23 -1 0.04 1.26
 5 23 1 -1.72 1.42
 -6 23 1 15.17 2.71
 6 23 -1 9.55 2.43
 -6 23 -1 9.31 2.4
 6 23 1 5.62 1.97
 0 24 -1 47.43 4.05
 0 24 -1 43.98 4.15
 0 24 1 41.41 3.99
 0 24 -1 44.96 4.11
 0 24 1 47.21 4.21
 0 24 1 45.42 4.1
 -1 24 1 0.99 1.38
 -1 24 1 1.38 1.43
 -1 24 1 1.63 1.62
 1 24 -1 3.61 1.65
 1 24 -1 2.56 1.73
 1 24 -1 -0.02 1.2
 1 24 1 -2.03 1.21
 -1 24 -1 2.99 1.42
 -1 24 -1 2.81 1.46
 -1 24 -1 2 1.72
 1 24 1 0.74 1.51
 1 24 1 1.9 1.53
 -2 24 1 11.53 2.35
 2 24 -1 16.17 2.58
 2 24 -1 10.77 2.32
 2 24 -1 15.55 2.85
 -2 24 1 13.7 2.63
 -2 24 1 15.97 2.88
 -2 24 -1 11.81 2.3
 2 24 1 11.97 2.65
 -2 24 -1 14.48 2.59
 2 24 1 13.47 2.5
 2 24 1 12.92 2.47
 -2 24 -1 14.34 2.81
 3 24 -1 5.99 2.08
 3 24 -1 9.24 2.2
 -3 24 1 2.71 1.73
 -3 24 1 6.44 1.76
 3 24 -1 5.52 1.88
 -3 24 -1 7.67 1.94
 -3 24 -1 8.73 2.4
 3 24 1 6.35 1.98
 3 24 1 6.23 2.01
 3 24 1 6.08 1.96
 4 24 -1 4.41 1.72
 -4 24 1 3.35 1.82
 -4 24 -1 3.46 1.67
 4 24 1 3.31 1.8
 0 25 1 1.36 1.47
 -1 25 1 12.56 2.45
 1 25 1 15.04 2.7
 -2 25 1 2.15 1.57
 1 0 2 20.69 1.04
 1 0 -2 20.18 1.01
 -1 0 -2 22.09 1.02
 1 0 2 20.78 1.04
 1 0 -2 21.19 1.02
 1 0 -2 23.38 1.01
 1 0 -2 21.83 1.02
 1 0 2 20.89 1.02
 -2 0 2 5.02 0.48
 2 0 -2 4.56 0.5
 2 0 2 5.72 0.56
 2 0 -2 5.03 0.54
 2 0 -2 4.23 0.55
 -2 0 -2 4.52 0.51
 2 0 -2 4.09 0.51
 2 0 2 6.15 0.58
 2 0 2 3.19 0.49
 3 0 2 99.43 4.25
 3 0 -2 99.6 4.21
 3 0 2 99.12 4.2
 3 0 2 94.04 4.16
 -3 0 2 96.57 4.14
 3 0 -2 100.14 4.2
 -3 0 -2 88.69 4.12
 3 0 2 101.9 4.27
 3 0 -2 94.41 4.11
 3 0 -2 92.42 4.15
 4 0 -2 9.53 1
 4 0 2 8.64 1
 4 0 2 10.49 1.03
 4 0 -2 10.46 1.04
 4 0 2 8.71 1.02
 4 0 2 10.27 1.02
 -4 0 -2 10.53 0.95
 4 0 -2 8.97 0.97
 -4 0 2 11.84 0.98
 5 0 2 224.33 9.52
 5 0 2 235.67 9.53
 5 0 -2 233.1 9.56
 5 0 2 239.79 9.68
 5 0 -2 228.46 9.41
 -5 0 -2 218.07 9.47
 5 0 2 237.71 9.71
 -5 0 2 216.68 9.46
 6 0 2 13.06 1.41
 6 0 -2 13.8 1.39
 6 0 2 13.26 1.39
 6 0 2 11.9 1.3
 6 0 -2 9.67 1.35
 -6 0 2 13.48 1.27
 -6 0 -2 12.8 1.29
 6 0 -2 12.31 1.41
 6 0 2 12.43 1.38
 7 0 -2 426.23 16.4
 7 0 -2 386.3 16.05
 7 0 -2 419.3 16.42
 -7 0 -2 380.11 16.27
 7 0 2 380.76 16.44
 7 0 2 415.15 16.6
 7 0 -2 410.04 16.64
 7 0 -2 397.92 16.27
 -7 0 2 385.25 16.23
 7 0 2 374.76 16.16
 7 0 2 404.69 16.33
 8 0 2 0.24 0.75
 -8 0 -2 1.4 0.77
 8 0 2 -0.85 0.6
 8 0 -2 0.04 0.72
 8 0 -2 -0.64 0.58
 8 0 -2 0.05 0.68
 8 0 2 -0.2 0.61
 8 0 -2 -0.47 0.6
 -8 0 2 0.09 0.63
 9 0 2 128.85 6.9
 9 0 -2 134.39 6.97
 -9 0 -2 145.03 6.83
 9 0 -2 131 6.93
 9 0 2 137.87 6.86
 9 0 2 138.88 7.02
 9 0 -2 140.03 6.88
 -9 0 2 147.59 6.83
 9 0 -2 139.85 6.87
 10 0 -2 6.92 1.43
 10 0 2 3.31 1.22
 -10 0 -2 6.17 1.36
 10 0 -2 2.58 1.05
 10 0 -2 6.11 1.39
 10 0 -2 3.9 1.2
 10 0 2 4.83 1.37
 10 0 2 3.47 1.15
 -10 0 2 5.94 1.42
 11 0 2 1.39 1
 11 0 2 1.22 1.08
 11 0 -2 0.87 0.9
 -11 0 -2 -0.35 0.74
 11 0 -2 1.32 1
 11 0 -2 1.25 1.01
 11 0 -2 0.16 0.94
 11 0 2 -0.08 0.86
 12 0 2 11.89 2.07
 12 0 -2 11.73 2.05
 -12 0 -2 10.98 1.96
 12 0 2 8.12 1.92
 12 0 -2 9.05 1.99
 12 0 2 9.83 2.04
 12 0 -2 12.37 2.2
 13 0 -2 4.73 1.79
 13 0 2 0.39 1.33
 13 0 2 2.7 1.53
 13 0 -2 2.61 1.54
 13 0 -2 -0.23 1.14
 14 0 -2 1.92 1.59
 14 0 2 1.43 1.54
 14 0 -2 -0.68 1.44
 14 0 -2 -0.31 1.37
 14 0 2 1.87 1.43
 15 0 2 11.7 2.72
 15 0 -2 5.89 2.23
 15 0 -2 1.96 2.01
 15 0 -2 11.91 2.63
 15 0 2 8.6 2.55
 0 -1 -2 -0.52 0.14
 0 -1 -2 -0.56 0.14
 -1 1 2 0.35 0.17
 -1 -1 -2 -0.01 0.15
 1 -1 2 0.11 0.14
 1 1 -2 0.23 0.14
 1 -1 2 0.27 0.16
 1 1 -2 0.08 0.14
 1 1 2 -0.02 0.16
 -1 1 -2 0.06 0.14
 1 -1 -2 0.3 0.16
 1 1 2 0.47 0.2
 1 -1 -2 0.29 0.17
 1 1 2 0.24 0.2
 -2 -1 -2 1.13 0.34
 2 -1 2 0.98 0.32
 2 1 -2 1.05 0.34
 -2 1 2 0.84 0.29
 2 -1 2 1.09 0.32
 2 -1 2 0.95 0.32
 2 1 -2 0.71 0.31
 2 1 2 0.52 0.32
 2 1 2 1.39 0.36
 -2 -1 2 0.51 0.26
 2 1 2 0.63 0.31
 2 -1 -2 1.28 0.35
 2 -1 -2 0.68 0.33
 2 -1 -2 1.6 0.35
 2 -1 -2 1.02 0.34
 -2 1 -2 0.57 0.27
 -3 1 2 87.52 3.96
 3 -1 2 91.75 3.99
 3 1 -2 96.17 4.05
 3 -1 2 90.75 3.92
 3 -1 2 96.39 4.03
 3 -1 2 96.19 4.02
 -3 -1 -2 89.59 3.99
 3 1 -2 92.06 3.96
 3 1 2 98.16 4.14
 -3 1 -2 87.91 3.95
 -3 -1 2 93.86 3.98
 3 -1 -2 91.23 4.01
 3 -1 -2 93.06 4.02
 3 1 2 91.94 4.02
 3 1 2 87.58 4.07
 3 -1 -2 87.24 3.94
 4 -1 2 7.05 0.92
 4 1 -2 6.09 0.83
 -4 -1 -2 8.7 0.88
 4 1 -2 6.77 0.91
 -4 1 2 8.94 0.91
 4 -1 2 6.78 0.93
 4 1 -2 7.38 0.87
 4 -1 2 7.24 0.92
 4 -1 2 6.66 0.89
 4 1 -2 8.2 0.99
 -4 -1 2 6.61 0.86
 4 -1 -2 6.69 0.9
 -4 1 -2 6.14 0.79
 4 1 2 6.57 0.89
 4 1 2 6.24 0.92
 4 -1 -2 7.56 0.84
 4 1 2 6.99 0.86
 4 -1 -2 6.76 0.89
 4 -1 -2 8.39 0.9
 5 -1 2 1.33 0.57
 -5 1 2 1.7 0.56
 5 -1 2 0.19 0.45
 5 -1 2 1.36 0.57
 5 1 -2 0.49 0.52
 5 -1 2 2.18 0.63
 5 1 -2 2.39 0.66
 -5 -1 -2 1.57 0.58
 5 1 -2 0.41 0.51
 5 1 -2 0.17 0.47
 5 -1 2 1 0.55
 -5 1 -2 1.53 0.58
 5 -1 -2 1.03 0.52
 5 -1 -2 0.92 0.53
 -5 -1 2 1.73 0.59
 5 1 2 1.39 0.62
 5 1 2 0.98 0.55
 5 1 2 0.69 0.53
 5 -1 -2 1.73 0.62
 5 -1 -2 2.39 0.66
 6 1 -2 -0.2 0.39
 6 -1 2 0.29 0.49
 6 -1 2 -0.45 0.43
 6 -1 2 -0.02 0.49
 -6 1 2 0.13 0.51
 -6 -1 -2 -0.32 0.41
 6 1 -2 0.36 0.53
 6 1 -2 -0.73 0.44
 6 1 -2 0.07 0.54
 6 1 -2 -0.45 0.48
 6 -1 2 -0.17 0.43
 6 -1 -2 0.36 0.52
 6 1 2 0.34 0.61
 6 1 2 0.35 0.58
 6 -1 -2 -0.25 0.44
 -6 1 -2 -0.26 0.44
 -6 -1 2 0.69 0.53
 6 1 2 -0.34 0.42
 6 -1 -2 -0.4 0.42
 7 -1 2 -0.18 0.54
 7 -1 2 -0.38 0.59
 7 -1 2 0.39 0.66
 -7 -1 -2 0.03 0.53
 7 -1 2 -0.75 0.57
 7 1 -2 0.35 0.73
 -7 1 2 -0.92 0.47
 7 1 -2 0.25 0.67
 7 1 -2 -0.52 0.56
 7 1 -2 -0.54 0.55
 7 1 -2 -0.42 0.52
 7 -1 -2 -0.69 0.57
 7 -1 -2 -0.73 0.54
 7 1 2 -0.48 0.6
 7 -1 -2 0.04 0.65
 -7 -1 2 -0.07 0.54
 7 1 2 -0.37 0.56
 7 1 2 -0.34 0.62
 -7 1 -2 0.39 0.62
 8 -1 2 2.24 0.89
 8 -1 2 0.78 0.74
 8 -1 2 2.62 0.95
 8 1 -2 1.03 0.84
 -8 1 2 0.3 0.69
 -8 -1 -2 1.32 0.75
 8 1 -2 1.04 0.79
 8 -1 2 3.14 1
 8 1 -2 2.07 0.99
 8 1 -2 1.74 0.89
 8 -1 -2 1.58 0.86
 8 -1 -2 1.08 0.74
 8 1 2 3.19 1.08
 8 -1 -2 2.28 1.02
 -8 -1 2 1.88 0.8
 8 -1 -2 -0.13 0.65
 8 1 2 2.08 0.91
 8 1 2 2.26 0.95
 -8 1 -2 1.57 0.83
 9 -1 2 -1.45 0.59
 9 1 -2 -0.3 0.73
 9 1 -2 0.44 0.76
 9 -1 2 0.1 0.71
 9 -1 2 0.04 0.72
 9 -1 2 0.59 0.86
 -9 -1 -2 0.35 0.76
 -9 1 2 -0.1 0.73
 9 1 -2 0.52 0.84
 9 1 -2 -0.18 0.71
 9 1 2 -0.65 0.75
 -9 1 -2 -0.27 0.72
 9 -1 -2 -0.29 0.7
 -9 -1 2 0.47 0.81
 9 -1 -2 0.17 0.66
 9 1 2 -0.42 0.61
 9 1 2 -0.35 0.69
 9 -1 -2 -0.99 0.64
 9 -1 -2 -0.72 0.58
 10 -1 2 3.18 1.1
 10 1 -2 1.11 0.94
 10 -1 2 -0.04 0.82
 10 -1 2 0.23 0.9
 10 1 -2 0.27 0.85
 10 1 -2 2.62 1.09
 -10 1 2 1.4 1.06
 -10 -1 -2 0.54 0.76
 10 -1 -2 0.93 0.9
 10 -1 -2 1.62 0.99
 -10 -1 2 0.06 0.85
 -10 1 -2 2.06 0.93
 10 1 2 0.75 1.07
 10 1 2 2.11 0.91
 10 -1 -2 2.03 1.03
 10 1 2 0.77 0.86
 10 -1 -2 1.47 0.87
 11 -1 2 0.76 0.96
 11 1 -2 0.03 0.93
 11 1 -2 1.43 1.08
 -11 -1 -2 0.8 0.94
 11 1 -2 0.75 0.9
 11 -1 2 1.07 0.96
 11 -1 2 -0.01 0.79
 -11 1 2 0.39 0.84
 11 -1 -2 1.41 0.93
 11 -1 -2 1.17 0.97
 -11 1 -2 0.08 0.81
 11 -1 -2 -0.84 0.87
 11 -1 -2 -0.3 0.9
 11 1 2 2.64 1.18
 11 1 2 1.41 1.03
 11 1 2 2.59 1.16
 12 -1 2 1.17 1.13
 12 -1 2 0.5 0.93
 -12 -1 -2 -0.35 1
 12 1 -2 -0.97 0.92
 12 1 -2 0.49 1.16
 12 -1 2 2.16 1.18
 12 1 -2 1.32 1.12
 12 1 2 -0.92 0.95
 12 -1 -2 0.45 1.25
 -12 1 -2 0.99 1.03
 12 -1 -2 1.66 1.08
 12 1 2 0.44 0.96
 12 1 2 1.4 1.08
 12 -1 -2 1.41 1.19
 12 -1 -2 0.82 1.24
 13 -1 2 -1.49 1.02
 13 -1 2 1.7 1.46
 13 1 -2 -1.13 1.03
 13 1 -2 0.19 1.21
 13 1 -2 -0.82 1
 13 -1 -2 -0.85 1.12
 13 1 2 0.05 1.33
 13 1 2 0.1 1.25
 -13 1 -2 -0.69 0.88
 13 -1 -2 -0.24 1.13
 13 -1 -2 0.24 1.17
 13 1 2 -0.94 1.1
 14 1 -2 -1.2 1.3
 14 1 -2 0.03 1.31
 14 -1 2 1.14 1.56
 14 1 -2 -0.65 1.39
 14 -1 2 -0.42 1.25
 14 1 2 0.55 1.43
 14 -1 -2 -1.24 1.19
 14 1 2 0.82 1.56
 14 -1 -2 -0.39 1.38
 14 -1 -2 0.85 1.54
 15 1 -2 -1.45 1.66
 15 1 -2 2.92 1.87
 15 -1 2 -0.93 1.4
 15 -1 2 0.12 1.56
 15 1 -2 0.04 1.41
 15 1 2 -1.02 1.59
 15 -1 -2 -0.31 1.7
 15 1 2 -1.26 1.46
 15 -1 -2 0.74 1.6
 0 2 -2 57.11 2.44
 0 -2 -2 57.58 2.51
 0 2 2 63.39 2.54
 0 2 2 64.13 2.52
 0 2 -2 60.08 2.4
 0 -2 2 58.75 2.41
 0 2 -2 60.2 2.44
 0 -2 -2 58.92 2.51
 0 2 2 60.2 2.49
 1 -2 2 127.91 4.92
 -1 2 2 116.27 4.93
 -1 2 2 119.03 4.96
 1 2 -2 118.36 4.95
 1 2 -2 125.54 4.99
 -1 -2 -2 123.08 5
 1 2 -2 125.18 4.9
 1 -2 2 130.78 4.91
 1 2 2 128.99 5.05
 1 2 2 117.79 5.05
 1 2 2 126.83 4.97
 1 -2 -2 122.18 4.99
 -1 2 -2 125.52 4.91
 1 -2 -2 126.71 4.98
 -1 2 -2 120.99 4.86
 2 -2 2 24.71 1.27
 -2 2 2 24.76 1.3
 -2 -2 -2 24.74 1.34
 2 2 -2 23.82 1.32
 2 2 -2 26.42 1.36
 2 -2 2 25.9 1.27
 2 -2 2 22.91 1.26
 2 2 -2 22.34 1.32
 2 -2 2 23.94 1.27
 2 -2 -2 21.94 1.28
 2 -2 -2 20.3 1.24
 -2 2 -2 24.84 1.27
 2 2 2 23.54 1.35
 -2 -2 2 22.76 1.26
 2 -2 -2 24.13 1.34
 2 2 2 26.52 1.41
 2 -2 -2 23.1 1.32
 3 2 -2 241.04 9.54
 3 -2 2 245.93 9.58
 3 2 -2 235.9 9.57
 3 -2 2 236.58 9.54
 -3 2 2 231.41 9.55
 -3 -2 -2 230.7 9.59
 3 -2 2 251.35 9.57
 3 2 -2 240.89 9.68
 3 -2 2 243.95 9.4
 3 2 -2 245.76 9.74
 3 2 2 240.6 9.72
 3 -2 -2 235.64 9.6
 -3 2 -2 221.56 9.52
 3 2 2 242.76 9.76
 3 -2 -2 236.32 9.43
 -3 -2 2 245.43 9.56
 3 -2 -2 231.77 9.57
 -4 -2 -2 -0.54 0.35
 4 2 -2 0.35 0.42
 4 -2 2 0.3 0.4
 4 -2 2 0.11 0.35
 4 2 -2 0.34 0.45
 -4 2 2 0.05 0.36
 4 2 -2 0.62 0.48
 4 -2 2 0.39 0.38
 4 2 -2 -0.12 0.41
 -4 2 -2 -0.01 0.35
 4 -2 -2 0.11 0.39
 4 -2 -2 -0.32 0.36
 4 2 2 0.14 0.38
 -4 -2 2 0.35 0.41
 4 -2 -2 0.57 0.4
 4 -2 -2 0.25 0.4
 4 2 2 0.66 0.47
 4 2 2 -0.17 0.35
 -5 2 2 182.1 7.61
 5 2 -2 181.73 7.82
 5 -2 2 180.83 7.53
 5 2 -2 187.09 7.71
 5 2 -2 178.55 7.67
 5 2 -2 172.54 7.75
 5 -2 2 177.62 7.63
 5 -2 2 177.33 7.62
 -5 -2 -2 176.74 7.65
 -5 -2 2 184.91 7.63
 5 -2 -2 172.76 7.64
 5 2 2 182.93 7.7
 5 2 2 170.11 7.77
 5 -2 -2 176.57 7.68
 5 -2 -2 170.15 7.5
 -5 2 -2 181.63 7.61
 5 -2 -2 180.14 7.67
 5 2 2 183.97 7.85
 6 -2 2 16.98 1.55
 6 -2 2 15.64 1.5
 6 2 -2 19.57 1.66
 -6 2 2 19.58 1.56
 6 -2 2 21.92 1.64
 -6 -2 -2 19.5 1.61
 6 -2 2 21.32 1.67
 6 2 -2 19.08 1.72
 6 2 -2 19.64 1.74
 6 2 -2 20.77 1.74
 6 -2 -2 21.52 1.73
 6 2 2 16.23 1.63
 6 -2 -2 18.86 1.62
 6 2 2 16.83 1.64
 -6 -2 2 19.19 1.55
 6 -2 -2 19.76 1.63
 6 2 2 18.26 1.62
 6 -2 -2 16.04 1.54
 -6 2 -2 19.85 1.58
 -7 2 2 209.05 9.3
 7 2 -2 222.85 9.47
 7 -2 2 200.58 9.18
 7 2 -2 214.4 9.46
 -7 -2 -2 214.45 9.38
 7 -2 2 211.45 9.33
 7 2 -2 227.37 9.72
 7 -2 2 212.57 9.36
 7 2 -2 216.85 9.64
 7 -2 2 235.71 9.5
 7 2 2 221.63 9.64
 -7 2 -2 205.22 9.32
 7 -2 -2 206.98 9.21
 7 2 2 220.09 9.66
 7 -2 -2 217.97 9.43
 7 2 2 209.93 9.41
 -7 -2 2 223.03 9.36
 7 -2 -2 209.31 9.38
 8 -2 2 5.79 1.28
 8 2 -2 3.72 1.1
 -8 -2 -2 6.27 1.25
 8 -2 2 3.25 1.06
 -8 2 2 5.64 1.2
 8 2 -2 3.92 1.12
 8 2 -2 4.44 1.19
 8 -2 2 6.49 1.3
 8 -2 2 4.11 1.09
 8 -2 -2 2.62 0.97
 8 -2 -2 4.71 1.1
 8 2 2 6.86 1.35
 -8 -2 2 1.73 0.88
 8 2 2 3.3 1.09
 8 2 2 5.09 1.22
 8 -2 -2 4.98 1.14
 -8 2 -2 3.12 0.97
 9 -2 2 198.61 9
 -9 2 2 195.05 8.95
 9 -2 2 188.01 9.09
 9 2 -2 186.61 9.19
 -9 -2 -2 194.54 8.96
 9 -2 2 185.19 9.1
 9 2 -2 187.65 9.19
 9 -2 2 205.84 9.05
 9 2 -2 194.26 9.06
 9 -2 -2 190.14 8.97
 9 2 2 186.15 9.16
 9 2 2 207.69 9.33
 -9 -2 2 201.76 8.96
 9 -2 -2 192.53 9.01
 9 2 2 207.35 9.15
 -9 2 -2 190.66 8.91
 9 -2 -2 197.95 8.92
 9 -2 -2 191.7 9
 10 2 -2 10.01 1.81
 -10 -2 -2 9.43 1.59
 -10 2 2 9.93 1.69
 10 -2 2 10.26 1.72
 10 2 -2 9.95 1.85
 10 -2 2 8.43 1.54
 10 2 -2 10.27 1.9
 10 -2 2 10.33 1.76
 10 -2 2 12.39 1.63
 10 -2 -2 10.98 1.75
 -10 -2 2 8.77 1.73
 10 -2 -2 10.9 1.79
 10 -2 -2 11.33 1.76
 10 -2 -2 8.98 1.69
 -10 2 -2 10.1 1.75
 10 2 2 15.55 1.88
 10 2 2 12.16 1.98
 10 -2 -2 9.7 1.68
 10 2 2 9.38 1.63
 11 -2 2 28.94 2.79
 11 -2 2 27.17 2.63
 11 -2 2 31.4 2.83
 -11 2 2 32.07 2.78
 11 2 -2 28.24 2.91
 11 2 -2 28.51 3
 -11 -2 -2 27.72 2.6
 11 2 -2 30.99 2.79
 -11 2 -2 31.18 2.7
 11 2 2 28.23 2.82
 11 -2 -2 31.91 2.97
 11 -2 -2 30.38 2.86
 11 -2 -2 25.48 2.65
 11 2 2 25.92 2.62
 11 2 2 27.82 2.78
 11 -2 -2 28.06 2.68
 12 -2 2 4.54 1.55
 12 2 -2 6.97 1.6
 12 2 -2 5.17 1.63
 12 -2 2 4.75 1.54
 12 -2 2 8.72 1.86
 -12 -2 -2 8.35 1.69
 12 2 -2 3.65 1.49
 12 -2 -2 4.21 1.45
 12 2 2 5.82 1.6
 12 -2 -2 6.76 1.71
 12 -2 -2 4.74 1.54
 12 2 2 8.06 1.87
 12 2 2 2.84 1.28
 -12 2 -2 4.49 1.49
 12 -2 -2 5.76 1.57
 13 2 -2 -0.18 1.11
 13 2 -2 -0.07 1.15
 13 -2 2 -0.6 1.15
 13 2 -2 0.82 1.2
 13 -2 2 -1.09 1.12
 13 -2 -2 -0.76 1.17
 13 2 2 0.68 1.29
 13 2 2 -1.48 0.93
 13 2 2 -0.29 1.01
 13 -2 -2 -0.02 1.11
 13 -2 -2 -2.22 1.03
 -13 2 -2 0.71 1.17
 13 -2 -2 -0.28 1.22
 14 2 -2 0.44 1.39
 14 2 -2 1.37 1.62
 14 -2 2 3.41 1.84
 14 2 -2 1.45 1.33
 14 -2 2 0.09 1.35
 14 2 2 0 1.2
 14 -2 -2 0.58 1.43
 14 2 2 2.36 1.77
 14 -2 -2 0.86 1.75
 14 -2 -2 -0.66 1.32
 15 2 -2 12.68 2.76
 15 2 -2 8.63 2.42
 15 2 -2 6.08 2.16
 15 -2 2 8.12 2.38
 15 -2 -2 8.69 2.52
 15 2 2 4.07 2.08
 15 2 2 12.52 2.81
 15 -2 -2 10.99 2.65
 0 3 -2 -0.4 0.17
 0 -3 2 -0.02 0.19
 0 3 2 -0.88 0.16
 0 3 2 -0.4 0.18
 0 -3 -2 -0.57 0.18
 0 3 -2 -0.5 0.13
 0 -3 -2 -0.45 0.19
 0 3 2 0.05 0.25
 0 3 -2 -0.3 0.15
 -1 3 2 12.4 0.83
 1 -3 2 11.46 0.73
 1 -3 2 11.51 0.74
 1 3 -2 13.47 0.84
 -1 3 2 12.04 0.83
 -1 3 2 12.64 0.87
 -1 -3 -2 12.32 0.85
 1 -3 2 13.02 0.78
 1 3 -2 11.95 0.82
 1 -3 2 11.6 0.76
 1 3 -2 10.25 0.77
 -1 -3 2 12.78 0.78
 1 3 2 10.13 0.85
 1 -3 -2 11.6 0.83
 1 3 2 11.31 0.84
 1 -3 -2 13.85 0.85
 -1 3 -2 14.59 0.82
 1 3 2 13.78 0.92
 -1 3 -2 11.63 0.76
 -1 3 -2 13.24 0.78
 -2 -3 -2 18.12 1.16
 -2 3 2 19.23 1.16
 2 3 -2 15.21 1.11
 2 -3 2 18.61 1.12
 2 -3 2 17.84 1.05
 2 -3 2 18.46 1.11
 2 3 -2 19.8 1.16
 2 3 -2 17.72 1.17
 2 -3 2 18.33 1.1
 2 3 2 20.13 1.23
 2 -3 -2 21.08 1.21
 -2 3 -2 19.58 1.11
 -2 -3 2 19.02 1.13
 2 3 2 19.43 1.25
 2 3 2 17.41 1.21
 2 -3 -2 18.03 1.16
 2 -3 -2 18.8 1.16
 -3 -3 -2 31.17 1.82
 -3 3 2 34.95 1.86
 3 -3 2 32.35 1.77
 3 3 -2 32.22 1.86
 3 -3 2 34.15 1.8
 3 3 -2 30.35 1.85
 3 3 -2 33.04 1.89
 3 -3 2 33.17 1.82
 3 -3 2 33.84 1.82
 3 -3 -2 34.33 1.86
 3 3 2 32.72 1.86
 3 3 2 36.37 2.01
 3 -3 -2 39.37 1.93
 3 -3 -2 30.31 1.77
 -3 3 -2 31.19 1.78
 3 -3 -2 31.85 1.84
 3 3 2 36.65 1.99
 -3 -3 2 37.21 1.84
 4 3 -2 31.76 1.89
 4 3 -2 28.42 1.95
 4 3 -2 32.84 1.98
 -4 -3 -2 33.3 1.91
 4 -3 2 30.3 1.85
 4 -3 2 28.27 1.84
 4 -3 2 30.45 1.85
 4 -3 2 31.72 1.82
 -4 3 2 29.64 1.82
 4 3 2 36.35 2.07
 -4 3 -2 32.25 1.85
 4 -3 -2 30.16 1.89
 4 -3 -2 31.03 1.85
 -4 -3 2 29.11 1.81
 4 -3 -2 29.48 1.84
 4 3 2 27.87 1.91
 4 -3 -2 32.29 1.86
 4 3 2 31.93 2.02
 5 -3 2 -0.06 0.42
 5 3 -2 0.04 0.48
 -5 3 2 0.16 0.44
 5 3 -2 0.39 0.52
 5 -3 2 0.35 0.49
 5 3 -2 0.68 0.54
 5 -3 2 0.36 0.48
 -5 -3 -2 0.22 0.45
 5 -3 2 -0.02 0.39
 5 -3 -2 0.68 0.49
 5 -3 -2 0.02 0.46
 -5 -3 2 -0.08 0.4
 -5 3 -2 0.29 0.44
 5 3 2 0.58 0.57
 5 -3 -2 0.2 0.44
 5 -3 -2 0.3 0.4
 5 3 2 0.29 0.48
 5 3 2 -0.09 0.49
 -6 3 2 17.32 1.56
 6 3 -2 18.16 1.64
 6 3 -2 22.95 1.81
 6 -3 2 18.78 1.61
 6 3 -2 15.56 1.61
 -6 -3 -2 18.93 1.58
 6 -3 2 18.78 1.58
 6 -3 2 15.24 1.48
 6 3 2 17.07 1.65
 -6 3 -2 17.24 1.54
 6 -3 -2 19.93 1.64
 6 3 2 14.95 1.62
 6 -3 -2 17.7 1.59
 6 -3 -2 16.01 1.54
 6 -3 -2 18.78 1.69
 6 3 2 18.56 1.74
 -6 -3 2 19.67 1.57
 7 -3 2 -0.54 0.51
 7 3 -2 -0.9 0.47
 7 3 -2 0.13 0.63
 7 -3 2 -0.9 0.49
 7 -3 2 0.16 0.57
 -7 -3 -2 -0.1 0.54
 -7 3 2 -0.97 0.47
 7 3 -2 -0.23 0.66
 7 3 2 0.16 0.66
 -7 -3 2 0.27 0.51
 7 -3 -2 -0.04 0.64
 7 3 2 -0.49 0.61
 7 -3 -2 -0.56 0.55
 -7 3 -2 0.53 0.58
 7 -3 -2 -0.11 0.5
 7 -3 -2 -0.39 0.55
 7 3 2 0.06 0.61
 8 -3 2 16.89 1.88
 8 -3 2 21.09 2.04
 8 3 -2 21.1 2.04
 -8 -3 -2 17.27 1.81
 -8 3 2 19.46 1.84
 8 3 -2 19.33 1.99
 8 -3 2 16.6 1.85
 8 3 -2 20.79 2.06
 8 -3 2 20.85 1.97
 8 -3 -2 22.78 1.95
 8 -3 -2 19.95 1.88
 -8 -3 2 18.71 1.83
 8 3 2 20.42 2.14
 8 -3 -2 22.18 2.04
 8 3 2 21.28 2.07
 8 3 2 20.76 2.05
 -8 3 -2 19.29 1.87
 9 -3 2 0.29 0.8
 9 3 -2 0.52 0.8
 9 3 -2 0.42 0.82
 -9 -3 -2 -0.31 0.7
 9 3 -2 -0.24 0.7
 9 -3 2 0.97 0.73
 -9 3 2 -0.37 0.69
 9 -3 2 -0.14 0.88
 9 -3 2 1.13 0.9
 9 -3 2 -0.36 0.71
 -9 -3 2 1.23 0.96
 9 -3 -2 -0.76 0.64
 9 -3 -2 0.35 0.78
 9 3 2 1.17 0.9
 -9 3 -2 0.55 0.74
 9 3 2 0.07 0.79
 9 3 2 -0.2 0.67
 9 -3 -2 -0.63 0.72
 10 3 -2 2.36 1.08
 10 3 -2 4.78 1.17
 10 -3 2 4.35 1.31
 -10 3 2 4.77 1.26
 -10 -3 -2 6.86 1.39
 10 -3 2 7.68 1.49
 10 -3 2 7.23 1.45
 10 -3 2 6.77 1.52
 10 3 -2 6.85 1.58
 10 3 2 5.13 1.37
 10 -3 -2 6.74 1.49
 10 -3 -2 8.01 1.56
 10 -3 -2 8.91 1.57
 10 3 2 7.72 1.64
 10 -3 -2 8.89 1.65
 -10 3 -2 6.5 1.43
 10 3 2 2.39 1.1
 11 -3 2 0.36 0.84
 11 -3 2 0.35 0.83
 11 -3 2 0.78 0.85
 -11 3 2 0.44 0.9
 -11 -3 -2 -0.33 0.77
 11 3 -2 1.26 1.04
 11 3 -2 1.59 1.03
 11 3 -2 0.32 0.99
 11 -3 2 0.11 0.99
 11 -3 -2 -0.52 0.89
 11 -3 -2 2.03 0.97
 11 3 2 0.61 0.93
 11 3 2 0.92 1
 11 3 2 0.67 0.96
 11 -3 -2 0.62 0.94
 11 -3 -2 1.53 1.02
 -11 3 -2 0.53 0.77
 11 -3 -2 0.01 0.83
 12 -3 2 -0.18 1.06
 12 3 -2 1.25 1.03
 12 3 -2 0.52 0.86
 12 -3 2 -0.14 0.89
 12 3 -2 1.7 1.21
 12 3 2 0.82 1.21
 12 -3 -2 1.28 1.07
 12 -3 -2 -0.87 0.94
 -12 3 -2 -0.07 1.04
 12 3 2 -1.1 0.86
 12 3 2 1.34 1.16
 12 -3 -2 -0.33 1.07
 12 -3 -2 -1.71 0.87
 13 3 -2 0.08 1.21
 13 -3 2 1.34 1.28
 13 -3 2 0.44 1.07
 13 3 -2 -0.36 1.17
 13 3 -2 0.05 1.24
 -13 3 -2 0.68 1.18
 13 -3 -2 2.55 1.4
 13 -3 -2 0.39 1.12
 13 -3 -2 -0.61 1.05
 13 3 2 -0.38 1.17
 13 3 2 -2.39 1.11
 13 3 2 -0.4 1.05
 13 -3 -2 0.16 1.35
 14 3 -2 0.47 1.28
 14 -3 2 1.33 1.47
 14 3 -2 0.98 1.61
 14 -3 2 -0.95 1.21
 14 3 -2 0.86 1.48
 14 -3 -2 -0.37 1.48
 14 3 2 2.76 1.56
 14 -3 -2 0.41 1.56
 14 3 2 -1.16 1.3
 15 3 -2 0.17 1.71
 15 3 -2 -1.69 1.42
 15 -3 2 -0.38 1.75
 15 3 -2 0.11 1.52
 15 3 2 -1.08 1.65
 15 -3 -2 -0.8 1.71
 15 3 2 -0.72 1.49
 15 -3 -2 0 1.61
 0 4 2 63.62 2.94
 0 4 -2 63.52 2.91
 0 -4 2 66.17 2.87
 0 -4 -2 68.38 2.96
 0 4 2 63.65 2.94
 0 4 -2 70.84 2.9
 0 -4 2 65.08 2.84
 0 4 -2 68.35 2.88
 0 -4 -2 69.3 2.99
 0 4 2 70.84 3.03
 1 4 -2 4.81 0.58
 1 4 -2 5.38 0.58
 1 4 -2 5.68 0.59
 -1 4 2 5.13 0.63
 -1 4 2 3.8 0.58
 1 -4 2 4.6 0.53
 1 -4 2 3.88 0.54
 -1 -4 -2 3.7 0.59
 -1 4 2 4.13 0.6
 1 4 2 5.7 0.67
 -1 4 -2 5.79 0.57
 1 4 2 4.04 0.63
 -1 -4 2 4.72 0.52
 1 4 2 4.54 0.67
 -1 4 -2 4.12 0.56
 -1 4 -2 4.69 0.55
 1 -4 -2 4.45 0.6
 1 -4 -2 4.49 0.65
 -2 -4 -2 8.31 0.85
 2 -4 2 7.16 0.75
 2 4 -2 10.74 0.84
 -2 4 2 10.2 0.85
 2 4 -2 7.42 0.76
 2 4 -2 8.96 0.84
 2 -4 2 8.94 0.8
 2 -4 2 9.38 0.73
 2 -4 2 9.83 0.82
 -2 -4 2 8.35 0.77
 -2 4 -2 9.3 0.78
 2 4 2 9.58 0.93
 2 -4 -2 9.29 0.85
 2 4 2 8.28 0.9
 2 -4 -2 9.36 0.84
 2 4 2 8.97 0.91
 -2 4 -2 9.39 0.77
 3 -4 2 161.27 6.67
 3 4 -2 171.47 7
 -3 4 2 156.32 6.82
 3 -4 2 146.06 6.76
 3 4 -2 162.78 6.85
 -3 -4 -2 167.8 6.92
 3 4 -2 164.28 6.95
 3 -4 2 174.11 6.84
 3 -4 2 172.9 6.83
 3 4 2 157.7 6.99
 3 -4 -2 177.14 6.78
 3 4 2 167.6 6.9
 3 -4 -2 150.5 6.82
 3 -4 -2 155.68 6.85
 3 -4 -2 186.1 6.93
 -3 4 -2 173.19 6.84
 -3 -4 2 164.13 6.82
 3 4 2 149.63 6.98
 4 4 -2 5.79 0.93
 4 -4 2 3.75 0.74
 -4 -4 -2 5.33 0.82
 4 4 -2 6.19 0.93
 4 -4 2 5.99 0.88
 4 -4 2 6.24 0.85
 -4 4 2 5.76 0.83
 4 -4 2 5.9 0.88
 4 4 -2 7.22 0.92
 4 4 2 5.91 0.95
 4 -4 -2 6.84 0.9
 4 -4 -2 4.71 0.77
 4 4 2 5.27 0.85
 4 -4 -2 6.4 0.91
 4 -4 -2 6.61 0.87
 -4 -4 2 6.48 0.86
 4 4 2 5.47 0.91
 -4 4 -2 5.82 0.85
 5 4 -2 316.37 12.51
 5 -4 2 280.35 12.36
 -5 -4 -2 303.36 12.47
 -5 4 2 293.55 12.38
 5 4 -2 315.96 12.66
 5 -4 2 290.85 12.39
 5 -4 2 305.44 12.42
 5 4 -2 305.32 12.69
 5 -4 2 299.54 12.2
 5 4 2 321.94 12.79
 -5 -4 2 297.05 12.39
 -5 4 -2 295.41 12.42
 5 -4 -2 301.39 12.26
 5 4 2 304.02 12.5
 5 -4 -2 289.35 12.42
 5 -4 -2 324.85 12.5
 5 4 2 305.7 12.67
 5 -4 -2 326.89 12.54
 -6 4 2 -0.02 0.48
 6 4 -2 -0.5 0.46
 6 -4 2 -0.37 0.39
 6 -4 2 -0.29 0.51
 6 4 -2 0.52 0.61
 6 -4 2 -0.63 0.41
 6 -4 2 -0.28 0.49
 -6 -4 -2 -0.07 0.52
 6 4 -2 -0.42 0.53
 -6 -4 2 -0.45 0.5
 6 4 2 0.02 0.52
 6 4 2 0.72 0.68
 6 -4 -2 0.08 0.52
 6 4 2 0.02 0.57
 6 -4 -2 -0.25 0.53
 6 -4 -2 -0.75 0.48
 -6 4 -2 -0.39 0.5
 6 -4 -2 -0.27 0.47
 -7 -4 -2 270.13 11.66
 -7 4 2 254.8 11.55
 7 -4 2 291.05 11.48
 7 4 -2 262.78 11.86
 7 4 -2 271.12 11.91
 7 4 -2 270.05 11.7
 7 -4 2 284.59 11.66
 7 -4 2 280.9 11.69
 7 -4 -2 268 11.66
 7 -4 -2 273.17 11.69
 7 4 2 283.77 11.99
 7 -4 -2 272.1 11.47
 7 -4 -2 268.64 11.65
 7 4 2 263.51 11.67
 -7 4 -2 277.85 11.63
 -7 -4 2 278.92 11.64
 7 4 2 281.56 12.01
 8 -4 2 0.21 0.68
 8 -4 2 0.02 0.86
 8 -4 2 -0.9 0.66
 8 4 -2 0.37 0.62
 -8 -4 -2 0.74 0.73
 -8 4 2 1.37 0.8
 8 4 -2 -0.39 0.53
 8 4 -2 -0.44 0.48
 8 -4 -2 -0.5 0.64
 8 4 2 0.52 0.79
 8 4 2 -0.71 0.63
 -8 4 -2 0.61 0.65
 -8 -4 2 0.06 0.66
 8 4 2 0.71 0.77
 8 -4 -2 0.22 0.65
 8 -4 -2 -0.4 0.66
 8 -4 -2 0.8 0.72
 9 -4 2 199.61 9.18
 9 -4 2 198.17 9.06
 9 4 -2 205.63 9.56
 9 4 -2 199.66 9.35
 -9 4 2 187.71 9.11
 9 -4 2 196.33 9.18
 9 4 -2 212.52 9.63
 -9 -4 -2 204.54 9.27
 9 -4 2 192.35 9.19
 9 -4 -2 198.87 9.14
 -9 -4 2 224.41 9.32
 9 -4 -2 196.17 9.21
 -9 4 -2 197.35 9.17
 9 4 2 194.3 9.3
 9 4 2 191.34 9.48
 9 4 2 201.47 9.54
 9 -4 -2 208.11 9.33
 10 -4 2 4.11 1.2
 -10 -4 -2 8.81 1.6
 10 -4 2 4.49 1.22
 10 4 -2 5.78 1.38
 -10 4 2 4.78 1.31
 10 4 -2 7.54 1.7
 10 -4 2 8.25 1.57
 10 4 -2 4.98 1.39
 10 -4 2 3.48 1.16
 10 4 2 6.19 1.4
 -10 4 -2 4.65 1.27
 10 -4 -2 4.24 1.25
 10 4 2 4 1.28
 10 -4 -2 5.94 1.38
 10 4 2 6.74 1.53
 10 -4 -2 6.98 1.48
 -11 4 2 59.01 4.13
 11 -4 2 64.07 4.31
 11 4 -2 73.76 4.62
 11 4 -2 74.64 4.75
 11 -4 2 67.26 4.32
 11 -4 2 61.73 4.16
 -11 -4 -2 60.69 4.18
 11 4 -2 61.78 4.42
 11 -4 2 57.33 4.26
 11 -4 -2 63.88 4.27
 11 -4 -2 57.85 4.18
 11 4 2 66.49 4.52
 11 4 2 58.04 4.36
 -11 4 -2 68.76 4.36
 11 -4 -2 68.58 4.38
 11 -4 -2 63.52 4.27
 11 4 2 70.81 4.49
 12 4 -2 1.73 1.2
 12 -4 2 5.3 1.45
 12 -4 2 1.44 1.16
 12 4 -2 2.23 1.37
 12 -4 2 2.12 1.22
 12 4 -2 3.52 1.57
 12 -4 -2 2.93 1.12
 12 4 2 1.18 1.17
 12 -4 -2 3.47 1.37
 -12 4 -2 4.32 1.3
 12 4 2 3.63 1.45
 12 4 2 0.49 1.34
 12 -4 -2 1.16 1.28
 12 -4 -2 3.75 1.33
 13 4 -2 0.7 1.14
 13 4 -2 0.66 1.18
 13 -4 2 0.29 1.35
 13 4 -2 2.57 1.37
 13 -4 2 1.28 1.18
 13 -4 -2 -0.14 1.2
 13 -4 -2 -0.07 1.08
 -13 4 -2 0 1.19
 13 -4 -2 -0.42 1.2
 13 4 2 -0.25 1.21
 13 4 2 0.98 1.4
 13 -4 -2 1.42 1.35
 13 4 2 -1 1.23
 14 -4 2 -0.33 1.35
 14 -4 2 1.47 1.33
 14 4 -2 -1.03 1.43
 14 4 -2 2.84 1.76
 14 4 -2 -1.35 1.25
 14 -4 -2 0.76 1.28
 14 -4 -2 -0.61 1.39
 14 4 2 -2.15 1.27
 14 -4 -2 0.4 1.31
 14 4 2 -2.25 1.19
 15 -4 2 7.7 2.42
 15 4 -2 4.31 2.07
 15 4 -2 5.04 2.24
 15 4 -2 8.64 2.6
 15 4 2 7.54 2.45
 15 -4 -2 4.09 2.15
 15 -4 -2 4.21 2.17
 15 4 2 7.67 2.47
 0 5 -2 -0.11 0.24
 0 5 -2 0.07 0.26
 0 5 2 -0.31 0.31
 0 5 -2 0.11 0.24
 0 5 2 -0.14 0.27
 0 -5 -2 -0.35 0.29
 0 5 2 -0.03 0.31
 0 -5 -2 -0.02 0.31
 0 -5 2 0 0.21
 0 -5 2 -0.17 0.25
 -1 5 2 54.75 2.54
 1 5 -2 51.05 2.46
 1 -5 2 55.85 2.41
 -1 5 2 49.97 2.46
 -1 -5 -2 48.46 2.45
 1 5 -2 51.95 2.48
 1 -5 2 51.62 2.36
 1 5 -2 50.78 2.41
 -1 5 2 49.73 2.44
 -1 -5 2 51.14 2.36
 -1 5 -2 51.16 2.39
 -1 5 -2 50.65 2.38
 1 5 2 49.43 2.53
 1 5 2 48.21 2.5
 -1 5 -2 48.95 2.41
 1 -5 -2 50.43 2.46
 1 -5 -2 47.89 2.45
 1 5 2 52.75 2.58
 2 -5 2 4.72 0.63
 2 5 -2 4.93 0.72
 -2 -5 -2 4.25 0.72
 2 5 -2 4.75 0.67
 2 -5 2 7 0.67
 -2 5 2 6.46 0.75
 -2 5 2 5.17 0.68
 2 5 -2 4.19 0.67
 2 -5 2 5.55 0.68
 2 -5 2 4.69 0.66
 -2 -5 2 4.35 0.63
 2 5 2 4.22 0.71
 2 -5 -2 5.27 0.74
 -2 5 -2 4.9 0.64
 2 5 2 3.8 0.69
 2 5 2 4 0.69
 2 -5 -2 5.62 0.78
 -2 5 -2 4.71 0.64
 -3 5 2 7.51 0.85
 3 5 -2 6.97 0.89
 3 -5 2 7.36 0.84
 -3 -5 -2 6.5 0.86
 3 5 -2 8.36 0.89
 3 5 -2 7.26 0.89
 3 -5 2 8.9 0.84
 3 -5 2 6.98 0.8
 3 -5 2 7.47 0.81
 3 5 2 8.12 0.92
 3 -5 -2 7.2 0.83
 -3 5 -2 8.67 0.85
 3 -5 -2 8.51 0.89
 3 5 2 6.19 0.94
 3 5 2 5.87 0.91
 -3 -5 2 7.18 0.83
 3 -5 -2 7.01 0.88
 3 -5 -2 5.62 0.82
 4 5 -2 21.42 1.63
 4 -5 2 25.5 1.6
 4 -5 2 20.74 1.51
 4 -5 2 21.89 1.51
 -4 5 2 22.3 1.6
 4 -5 2 20.87 1.57
 4 5 -2 26.58 1.77
 -4 -5 -2 21.84 1.62
 4 5 -2 20.84 1.61
 4 5 2 23.5 1.75
 4 -5 -2 25.78 1.67
 -4 -5 2 25.58 1.67
 4 -5 -2 23.37 1.59
 4 -5 -2 20.69 1.57
 4 5 2 25.93 1.74
 4 -5 -2 24.13 1.67
 -4 5 -2 22.57 1.55
 4 5 2 21.28 1.75
 5 5 -2 0.53 0.51
 5 -5 2 -0.32 0.44
 -5 -5 -2 0.21 0.47
 5 5 -2 -0.3 0.51
 5 -5 2 0.25 0.45
 5 5 -2 0.5 0.6
 -5 5 2 -0.38 0.36
 5 -5 2 0.22 0.5
 5 -5 2 0.7 0.49
 5 -5 -2 0.32 0.47
 5 5 2 0.27 0.52
 5 5 2 -0.22 0.5
 5 -5 -2 0.27 0.47
 5 -5 -2 -0.32 0.42
 5 -5 -2 -0.45 0.45
 -5 5 -2 -0.37 0.4
 -5 -5 2 0.51 0.52
 5 5 2 -0.05 0.58
 6 5 -2 43.72 2.83
 6 -5 2 39.54 2.63
 6 -5 2 42.66 2.65
 6 -5 2 41.13 2.56
 6 -5 2 44.04 2.65
 6 5 -2 48.25 2.95
 6 5 -2 45.94 2.91
 -6 5 2 44.21 2.64
 -6 -5 -2 43.11 2.7
 6 5 2 40.07 2.71
 6 5 2 48.67 2.97
 6 -5 -2 40.31 2.68
 6 5 2 39.77 2.85
 6 -5 -2 46.78 2.75
 6 -5 -2 40.57 2.64
 6 -5 -2 43.09 2.67
 -6 -5 2 42.72 2.62
 -6 5 -2 40.73 2.61
 7 5 -2 0.78 0.66
 7 5 -2 1.06 0.84
 7 -5 2 0.36 0.63
 7 -5 2 0.76 0.75
 -7 5 2 0.91 0.65
 -7 -5 -2 1.04 0.69
 7 5 -2 -0.14 0.74
 7 -5 2 0.48 0.65
 7 -5 2 0.22 0.56
 7 -5 -2 1.2 0.77
 -7 5 -2 0.25 0.59
 7 -5 -2 -0.1 0.56
 7 -5 -2 -0.26 0.64
 7 5 2 -0.47 0.65
 7 5 2 0.71 0.8
 -7 -5 2 -0.43 0.55
 7 -5 -2 0.64 0.71
 7 5 2 -0.06 0.62
 -8 -5 -2 8.9 1.46
 8 -5 2 9.24 1.49
 8 -5 2 9.12 1.45
 8 -5 2 11.86 1.61
 8 5 -2 9.19 1.55
 8 5 -2 7.74 1.42
 8 5 -2 8.28 1.42
 -8 5 2 7.89 1.4
 -8 5 -2 12.35 1.52
 8 5 2 9.25 1.55
 -8 -5 2 12.93 1.54
 8 -5 -2 12.11 1.7
 8 -5 -2 7.12 1.34
 8 5 2 10.99 1.68
 8 -5 -2 9.2 1.55
 8 5 2 10.48 1.68
 8 -5 -2 9.22 1.58
 9 -5 2 2.64 1.04
 -9 5 2 1.38 0.89
 9 5 -2 2.98 1.14
 9 5 -2 1.72 0.93
 9 -5 2 1.98 1.04
 9 5 -2 1.86 0.99
 -9 -5 -2 2.5 1.05
 9 -5 2 1.49 0.88
 9 -5 -2 1.44 0.92
 9 -5 -2 1.32 0.97
 -9 -5 2 1.55 0.96
 9 5 2 0.68 0.83
 9 5 2 1.41 0.88
 9 -5 -2 1.4 0.94
 9 -5 -2 1.48 0.85
 -9 5 -2 0.07 0.71
 9 5 2 1.84 1.03
 10 -5 2 4.25 1.23
 -10 -5 -2 2.41 0.99
 10 -5 2 0.6 0.93
 10 -5 2 4.2 1.2
 10 5 -2 3.64 1.28
 10 5 -2 4.55 1.44
 10 5 -2 5.29 1.38
 -10 5 2 4.33 1.2
 -10 5 -2 3.86 1.19
 10 5 2 3.32 1.15
 10 -5 -2 2.08 0.99
 10 -5 -2 2.86 1.15
 10 5 2 3.64 1.26
 10 5 2 2.87 1.34
 10 -5 -2 3.36 1.13
 11 5 -2 1.4 1.08
 11 -5 2 0.26 0.9
 -11 5 2 0.12 0.84
 11 5 -2 -0.74 0.96
 11 5 -2 -0.88 0.88
 11 -5 2 -0.6 0.92
 11 -5 2 0.13 0.89
 -11 -5 -2 0.13 0.84
 11 -5 -2 -0.12 0.85
 11 -5 -2 0.31 1.06
 11 5 2 0.37 0.96
 11 5 2 0.64 1.18
 11 5 2 1.16 1.03
 11 -5 -2 0.87 1
 -11 5 -2 1.37 1.01
 12 -5 2 1.97 1.22
 12 5 -2 4.05 1.5
 12 -5 2 0.45 0.89
 12 5 -2 1.47 1.35
 12 5 -2 1.44 1.23
 12 5 2 2.06 1.29
 12 5 2 1.15 1.24
 12 5 2 2.8 1.44
 12 -5 -2 2.58 1.27
 12 -5 -2 0.57 0.97
 -12 5 -2 0.99 1.11
 12 -5 -2 1.54 1.16
 13 5 -2 -0.56 1.14
 13 -5 2 -1.54 1.14
 13 5 -2 0.4 1.35
 13 -5 2 1.84 1.19
 13 5 -2 0.29 1.2
 13 5 2 -1.24 1.11
 13 -5 -2 2.03 1.31
 13 5 2 -0.96 1.36
 13 -5 -2 0.15 1.27
 -13 5 -2 -1.18 1.03
 13 -5 -2 -0.02 1.24
 13 5 2 0.15 1.26
 14 5 -2 -0.67 1.7
 14 -5 2 1.31 1.36
 14 5 -2 1.65 1.53
 14 5 -2 -3.09 1.29
 14 5 2 0.52 1.63
 14 5 2 0.62 1.55
 14 -5 -2 1.16 1.35
 14 -5 -2 -1.72 1.14
 14 -5 -2 1.13 1.5
 14 5 2 -1.44 1.28
 15 5 -2 -2.6 1.57
 15 5 -2 -0.3 1.75
 15 5 -2 -0.06 1.76
 15 -5 -2 -0.85 1.73
 15 5 2 -0.47 1.73
 15 5 2 1.08 1.9
 15 -5 -2 2.03 1.86
 0 6 2 85.58 3.93
 0 6 -2 78.64 3.75
 0 6 -2 84.59 3.8
 0 6 -2 82.1 3.83
 0 -6 2 87.2 3.75
 0 -6 -2 87.08 3.86
 0 6 2 84.9 3.86
 0 -6 -2 90.83 3.9
 0 -6 2 87.64 3.78
 0 6 2 92.73 3.89
 -1 -6 -2 47.22 2.35
 -1 -6 -2 45.92 2.32
 -1 6 2 46.53 2.32
 -1 6 2 45.03 2.34
 -1 6 2 43.27 2.27
 1 6 -2 41.77 2.2
 1 -6 2 42.12 2.2
 1 6 -2 40.92 2.26
 1 6 -2 43.51 2.27
 1 -6 2 42.54 2.14
 -1 -6 2 45.31 2.24
 1 -6 -2 45.36 2.3
 1 6 2 43.03 2.36
 -1 6 -2 41.28 2.22
 1 6 2 46.56 2.35
 -1 6 -2 40.69 2.15
 1 -6 -2 46.89 2.3
 1 6 2 45.18 2.34
 -1 6 -2 43.28 2.2
 -1 -6 2 44.41 2.18
 -2 6 2 26.5 1.65
 -2 6 2 25.11 1.69
 2 -6 2 26 1.49
 2 -6 2 26.9 1.58
 -2 -6 -2 25.5 1.67
 2 -6 2 27.3 1.6
 2 6 -2 25.92 1.66
 2 6 -2 27.95 1.66
 -2 6 2 28.48 1.67
 2 6 -2 24.97 1.65
 2 -6 2 28.43 1.59
 -2 6 -2 26.43 1.6
 -2 6 -2 26.98 1.61
 2 -6 -2 27.86 1.66
 -2 -6 2 26.46 1.56
 2 -6 -2 25.14 1.64
 -2 6 -2 26.28 1.59
 2 6 2 26.32 1.76
 2 6 2 28.02 1.78
 2 6 2 27.89 1.73
 3 -6 2 154.26 6.58
 3 6 -2 155.59 6.75
 3 -6 2 159.19 6.59
 3 6 -2 158.87 6.66
 -3 6 2 148.81 6.61
 -3 -6 -2 152.46 6.69
 3 -6 2 160.13 6.61
 3 6 -2 146.61 6.74
 3 -6 2 157.67 6.47
 3 6 2 150.58 6.81
 3 -6 -2 163.01 6.68
 3 6 2 154.97 6.81
 3 -6 -2 159.32 6.68
 -3 6 -2 155.74 6.59
 3 6 2 165.96 6.77
 3 -6 -2 149.96 6.66
 -3 -6 2 149.45 6.59
 -4 6 2 22.31 1.63
 -4 -6 -2 22.38 1.66
 4 -6 2 20.89 1.57
 4 -6 2 21.73 1.63
 4 -6 2 25.53 1.7
 4 -6 2 22.82 1.61
 4 6 -2 23.95 1.72
 4 6 -2 22.05 1.68
 4 6 -2 24.45 1.77
 4 6 2 23.76 1.82
 4 -6 -2 20.39 1.58
 -4 -6 2 23.58 1.69
 4 6 2 21.22 1.73
 4 6 2 24.01 1.85
 -4 6 -2 23.53 1.62
 4 -6 -2 25.31 1.71
 4 -6 -2 26.5 1.73
 4 -6 -2 21.62 1.61
 5 -6 2 328.17 13.74
 5 6 -2 343.44 14.36
 -5 -6 -2 341.38 14.13
 -5 6 2 355.61 14.09
 5 -6 2 329.83 13.97
 5 -6 2 351.02 14.03
 5 6 -2 341.4 14.3
 5 -6 2 356.66 14.06
 5 6 -2 367.99 14.19
 5 -6 -2 335.42 14.05
 5 6 2 347.79 14.13
 5 6 2 364.23 14.4
 5 -6 -2 357.44 13.86
 -5 6 -2 336.36 14.01
 -5 -6 2 343.05 14.06
 5 -6 -2 337.63 14.1
 5 6 2 342.38 14.39
 5 -6 -2 325.39 14.03
 6 -6 2 8.35 1.26
 -6 -6 -2 8.77 1.33
 6 -6 2 9.6 1.27
 6 -6 2 12.58 1.41
 6 -6 2 9.69 1.29
 -6 6 2 7.81 1.21
 6 6 -2 8.52 1.39
 6 6 -2 10.23 1.37
 6 6 -2 8.22 1.36
 6 6 2 10.62 1.54
 6 6 2 10.55 1.59
 -6 6 -2 13.41 1.38
 6 -6 -2 10.89 1.28
 6 -6 -2 11.74 1.42
 6 -6 -2 9.93 1.36
 6 -6 -2 11.92 1.35
 -6 -6 2 11.03 1.29
 6 6 2 10.78 1.47
 7 -6 2 241.32 10.08
 7 6 -2 235.83 10.37
 7 -6 2 223.58 9.8
 -7 6 2 235.23 10.1
 -7 -6 -2 237 10.1
 7 -6 2 236.34 10.07
 7 6 -2 235.18 10.21
 7 -6 2 228.44 10.02
 7 6 -2 230.9 10.35
 7 -6 -2 253.3 10.19
 -7 6 -2 222.18 9.98
 -7 -6 2 216.59 9.93
 7 6 2 204.88 10.02
 7 6 2 225.11 10.31
 7 6 2 218.61 10.36
 7 -6 -2 232.86 9.94
 7 -6 -2 240.55 10.14
 7 -6 -2 221.9 10.05
 8 6 -2 0 0.61
 8 -6 2 -0.04 0.58
 8 -6 2 0.99 0.82
 8 6 -2 -0.54 0.54
 8 -6 2 -0.14 0.74
 -8 -6 -2 0.2 0.68
 -8 6 2 0.33 0.72
 8 6 -2 0.98 0.78
 8 -6 2 0.25 0.72
 8 -6 -2 0.25 0.55
 8 6 2 -0.09 0.63
 -8 6 -2 -0.05 0.56
 8 -6 -2 0.38 0.83
 8 6 2 0.51 0.7
 8 -6 -2 -0.32 0.71
 8 6 2 0.26 0.66
 8 -6 -2 -0.06 0.65
 -8 -6 2 -0.28 0.67
 -9 6 2 125.78 6.26
 9 6 -2 117.12 6.39
 -9 -6 -2 127.48 6.36
 9 6 -2 118.05 6.53
 9 6 -2 121.6 6.59
 9 -6 2 131.95 6.34
 9 -6 2 118.77 6.23
 9 -6 -2 126.43 6.35
 -9 6 -2 128.63 6.32
 9 -6 -2 115.28 6.27
 9 -6 -2 138.7 6.37
 9 6 2 110.41 6.44
 9 -6 -2 107.89 6.17
 9 6 2 127.16 6.55
 9 6 2 126 6.68
 10 6 -2 4.65 1.44
 -10 -6 -2 4.17 1.21
 10 -6 2 3.26 1.25
 -10 6 2 4.9 1.29
 10 6 -2 6.64 1.59
 10 6 -2 3.61 1.24
 10 -6 2 6.63 1.53
 10 6 2 5.33 1.42
 10 6 2 3.79 1.28
 10 6 2 8.19 1.72
 10 -6 -2 3.97 1.25
 10 -6 -2 3.53 1.17
 -10 6 -2 7.32 1.48
 10 -6 -2 4.22 1.25
 11 -6 2 28.9 2.91
 11 6 -2 31.89 3.21
 11 6 -2 34.5 3.13
 11 -6 2 38.39 3.17
 -11 6 2 36.91 2.95
 11 6 -2 29.88 3.11
 11 6 2 29.96 2.96
 11 -6 -2 33.4 2.94
 -11 6 -2 34.91 3.02
 11 6 2 33.84 3.19
 11 -6 -2 36.24 3.04
 11 6 2 38.39 3.39
 12 -6 2 -0.13 0.87
 12 6 -2 -1.02 1.15
 12 -6 2 -0.5 1.09
 12 6 -2 -1.27 0.97
 12 6 -2 -0.09 1.32
 -12 6 -2 -0.39 0.89
 12 -6 -2 0.48 1.06
 12 -6 -2 1.75 1.23
 12 6 2 -0.1 1.12
 12 6 2 0.49 0.97
 12 6 2 1.7 1.34
 12 -6 -2 1.12 1.09
 13 6 -2 -0.9 1.25
 13 6 -2 -0.77 1.29
 13 6 -2 -1.22 1.29
 13 -6 2 -0.34 1.13
 13 -6 2 -0.07 1.21
 13 -6 -2 0.12 1.31
 13 -6 -2 0.21 1.16
 -13 6 -2 -1.74 0.93
 13 6 2 1.85 1.41
 13 6 2 0.07 1.25
 13 -6 -2 -1.04 1.09
 13 6 2 0.6 1.28
 14 6 -2 2.2 1.78
 14 6 -2 0.27 1.42
 14 6 -2 1.12 1.64
 14 -6 2 0.31 1.24
 14 -6 -2 1.61 1.46
 14 6 2 -0.43 1.38
 14 6 2 -0.21 1.4
 14 -6 -2 0.36 1.54
 14 6 2 -2.64 1.04
 15 6 -2 11.57 3.02
 15 6 -2 15.7 3.15
 15 -6 -2 14.31 2.83
 15 6 2 17.39 3.25
 15 -6 -2 15.82 2.99
 15 6 2 15.6 3.16
 0 7 -2 -0.25 0.25
 0 -7 2 -0.46 0.32
 0 7 2 -0.33 0.3
 0 7 2 -0.37 0.3
 0 7 2 -0.41 0.34
 0 7 -2 0.04 0.33
 0 -7 -2 0.07 0.36
 0 7 -2 -0.4 0.24
 0 -7 2 -0.17 0.29
 0 -7 -2 -0.11 0.32
 1 7 -2 1.72 0.48
 -1 7 2 0.93 0.48
 -1 -7 -2 0.71 0.43
 1 -7 2 1.86 0.49
 1 7 -2 1.16 0.47
 -1 -7 -2 1.2 0.46
 -1 7 2 1.28 0.49
 1 7 -2 1.04 0.41
 1 -7 2 0.88 0.43
 -1 7 2 0.79 0.4
 1 7 2 0.94 0.51
 -1 7 -2 1.65 0.43
 1 7 2 0.78 0.46
 1 -7 -2 0.69 0.42
 -1 7 -2 2.19 0.53
 -1 -7 2 2.27 0.54
 -1 -7 2 1.37 0.47
 -1 7 -2 1.76 0.5
 1 -7 -2 1.01 0.46
 1 7 2 0.82 0.47
 2 7 -2 19.62 1.43
 -2 -7 -2 25.35 1.56
 -2 7 2 22.25 1.5
 2 -7 2 19.78 1.36
 -2 7 2 19.87 1.46
 2 7 -2 20.76 1.46
 -2 7 2 20.78 1.52
 2 7 -2 20.57 1.44
 2 -7 2 20.46 1.37
 2 -7 2 21.26 1.39
 2 -7 -2 21.11 1.47
 2 7 2 19.32 1.48
 -2 7 -2 19.89 1.42
 -2 7 -2 19.18 1.38
 -2 7 -2 20.7 1.44
 2 -7 -2 21.66 1.51
 -2 -7 2 19.32 1.37
 2 7 2 18.79 1.56
 2 7 2 22.67 1.61
 3 7 -2 0.59 0.4
 3 -7 2 0.59 0.44
 3 7 -2 0.31 0.35
 3 -7 2 0.29 0.4
 -3 -7 -2 0.12 0.4
 -3 7 2 -0.23 0.33
 3 7 -2 -0.75 0.35
 3 -7 2 0.76 0.44
 3 -7 2 0.31 0.44
 3 -7 -2 0.14 0.42
 3 -7 -2 -0.3 0.38
 3 7 2 -0.39 0.37
 3 7 2 0.46 0.49
 -3 7 -2 0.28 0.43
 -3 7 -2 0.61 0.41
 -3 -7 2 0.24 0.44
 3 7 2 0.24 0.45
 3 -7 -2 0.01 0.42
 4 -7 2 13.24 1.24
 -4 -7 -2 12.78 1.33
 4 -7 2 15.61 1.3
 -4 7 2 12.95 1.24
 4 -7 2 12.56 1.25
 4 7 -2 16.13 1.39
 4 7 -2 11.21 1.19
 4 7 -2 14.91 1.36
 4 -7 2 11.88 1.23
 4 7 2 15.66 1.51
 -4 7 -2 13.69 1.26
 4 -7 -2 13.56 1.29
 4 -7 -2 13.44 1.35
 -4 -7 2 12.57 1.23
 4 -7 -2 14.39 1.3
 4 -7 -2 14.79 1.38
 4 7 2 14.73 1.41
 4 7 2 12.92 1.41
 5 -7 2 0.05 0.51
 -5 7 2 0.83 0.55
 5 -7 2 -0.27 0.49
 5 7 -2 -0.04 0.56
 5 7 -2 0.87 0.7
 5 -7 2 0.47 0.5
 -5 -7 -2 -0.29 0.41
 5 -7 2 0.56 0.53
 5 7 2 -0.44 0.57
 5 7 2 0.37 0.61
 5 -7 -2 0.05 0.48
 5 -7 -2 -0.15 0.53
 5 -7 -2 -0.19 0.55
 5 7 2 -0.11 0.57
 -5 -7 2 0.13 0.53
 -5 7 -2 -0.2 0.52
 5 -7 -2 0.42 0.51
 6 -7 2 0.77 0.68
 6 7 -2 1.26 0.79
 -6 7 2 0.76 0.64
 6 -7 2 1.22 0.72
 6 -7 2 1.67 0.71
 6 7 -2 1.47 0.81
 6 -7 2 1.04 0.67
 -6 -7 -2 1.61 0.71
 6 7 -2 1.39 0.8
 6 -7 -2 0.52 0.65
 6 7 2 1.18 0.81
 6 7 2 1.62 0.87
 6 -7 -2 1.24 0.67
 -6 7 -2 0.79 0.65
 6 -7 -2 1.65 0.82
 -6 -7 2 1.09 0.66
 6 -7 -2 1.52 0.78
 6 7 2 0.07 0.65
 7 -7 2 2.5 0.88
 7 -7 2 3.21 0.96
 7 7 -2 2.98 0.96
 7 7 -2 2.38 0.93
 -7 -7 -2 2.19 0.86
 7 7 -2 3.36 1.03
 7 -7 2 1.58 0.78
 -7 7 2 1.58 0.85
 7 -7 2 2.51 0.99
 -7 7 -2 4.18 0.99
 7 -7 -2 2.87 0.92
 -7 -7 2 2.3 0.9
 7 7 2 2.27 0.98
 7 7 2 3.35 1.04
 7 -7 -2 2.22 0.87
 7 -7 -2 2.3 0.87
 7 7 2 3.1 1.09
 7 -7 -2 1.9 0.84
 8 7 -2 8.11 1.52
 8 -7 2 11.21 1.67
 -8 7 2 12.73 1.66
 8 7 -2 11.39 1.77
 -8 -7 -2 8.51 1.53
 8 -7 2 12.55 1.6
 8 7 -2 10.97 1.75
 8 -7 -2 9.8 1.56
 8 -7 -2 10.78 1.76
 8 -7 -2 14.2 1.69
 8 7 2 9.69 1.66
 -8 7 -2 12.28 1.5
 8 7 2 13.13 1.68
 8 -7 -2 14.46 1.81
 8 7 2 11.55 1.79
 9 7 -2 -0.3 0.81
 9 7 -2 2.07 1.07
 9 -7 2 1.15 1.03
 9 -7 2 0.86 0.81
 -9 7 2 2.04 0.93
 9 7 -2 0.57 0.86
 -9 -7 -2 2.07 1.08
 -9 7 -2 0.15 0.74
 9 7 2 -0.7 0.72
 9 7 2 1.26 0.88
 9 -7 -2 0.34 0.76
 9 -7 -2 0.01 0.76
 9 7 2 1.62 0.88
 9 -7 -2 2.01 1.1
 9 -7 -2 1.72 1.03
 10 7 -2 12.3 2.07
 -10 -7 -2 13.06 1.78
 10 7 -2 11.77 2.03
 10 -7 2 10.35 1.75
 10 -7 2 9.54 1.77
 10 7 -2 12.95 2.13
 -10 7 2 14.68 1.9
 10 7 2 17.42 2.14
 -10 7 -2 11.54 1.81
 10 -7 -2 10.97 1.89
 10 -7 -2 15.81 1.95
 10 -7 -2 12.54 1.94
 10 7 2 11.41 1.91
 10 -7 -2 9.85 1.75
 10 7 2 14.55 1.97
 11 7 -2 3.23 1.49
 11 7 -2 5.22 1.59
 11 7 -2 2.17 1.2
 -11 7 2 3.45 1.24
 11 -7 2 1.03 1.02
 -11 7 -2 4.82 1.31
 11 7 2 2.83 1.24
 11 -7 -2 2.06 1.22
 11 7 2 1.76 1.26
 11 7 2 2.34 1.32
 11 -7 -2 3.52 1.21
 12 7 -2 -0.19 1.1
 12 7 -2 -0.61 1.13
 12 -7 2 -1.05 0.88
 -12 7 2 -0.29 0.89
 12 7 -2 -0.83 0.94
 12 -7 2 -0.24 1.09
 12 7 2 1.68 1.3
 12 -7 -2 0.16 1
 12 7 2 0.34 1.03
 12 7 2 -0.76 1.02
 -12 7 -2 -0.05 1.08
 12 -7 -2 0.19 1.03
 13 7 -2 2.4 1.63
 13 7 -2 -0.55 1.39
 13 7 -2 0.25 1.39
 13 -7 2 0.56 1.16
 13 7 2 -0.14 1.49
 13 7 2 -1.18 1.12
 13 7 2 1.81 1.52
 13 -7 -2 -0.67 1.03
 -13 7 -2 -0.17 1
 13 -7 -2 -0.37 1.18
 14 7 -2 0.84 1.45
 14 7 -2 -0.1 1.35
 14 7 -2 2.24 1.61
 14 7 2 2.11 1.62
 14 7 2 2.24 1.75
 14 -7 -2 1.49 1.58
 14 7 2 0.72 1.46
 -14 7 -2 0.68 1.3
 14 -7 -2 0.32 1.41
 15 7 -2 -2.31 1.65
 15 -7 -2 0.23 1.62
 15 -7 -2 0.94 1.84
 15 7 2 -0.36 1.75
 0 -8 -2 22.55 1.52
 0 8 2 22.13 1.62
 0 8 -2 20.88 1.47
 0 8 -2 20.79 1.44
 0 8 -2 20.73 1.48
 0 8 2 20.58 1.53
 0 -8 -2 19.07 1.46
 0 8 2 22.35 1.52
 0 -8 2 22.57 1.47
 0 -8 2 20.12 1.4
 1 -8 2 45.4 2.43
 -1 8 2 48.96 2.55
 -1 -8 -2 43.53 2.54
 1 -8 2 47.18 2.41
 1 8 -2 48.35 2.56
 -1 8 2 47.7 2.56
 1 8 -2 47.45 2.51
 -1 -8 -2 45.02 2.53
 1 8 -2 45.98 2.5
 -1 8 2 47.69 2.6
 1 -8 -2 47.6 2.55
 -1 8 -2 45.09 2.44
 1 8 2 46.39 2.53
 -1 -8 2 47.37 2.43
 -1 8 -2 43.95 2.45
 1 8 2 45.22 2.57
 -1 -8 2 46.51 2.44
 1 8 2 45.97 2.65
 -1 8 -2 43.57 2.47
 1 -8 -2 48.68 2.54
 2 -8 2 19.4 1.45
 -2 -8 -2 24.56 1.62
 2 8 -2 20.99 1.54
 2 8 -2 21.9 1.58
 -2 8 2 21.85 1.57
 -2 8 2 21.69 1.55
 2 8 -2 20.98 1.54
 2 -8 2 19.76 1.45
 -2 8 2 22 1.61
 -2 -8 2 20.48 1.52
 2 8 2 19.09 1.64
 -2 8 -2 21.18 1.51
 2 8 2 19.8 1.6
 2 -8 -2 21.45 1.55
 -2 8 -2 21.74 1.52
 -2 8 -2 21.9 1.52
 2 8 2 24.23 1.72
 2 -8 -2 24.39 1.6
 -3 8 2 159.74 6.79
 3 -8 2 154.39 6.67
 -3 -8 -2 146.87 6.78
 3 -8 2 155.52 6.55
 3 8 -2 152.81 6.78
 3 8 -2 150.74 6.87
 3 -8 2 157.18 6.7
 -3 8 2 148.8 6.76
 3 -8 2 154.74 6.65
 3 8 -2 156.29 6.89
 -3 8 -2 158.53 6.73
 -3 -8 2 152.39 6.69
 3 -8 -2 157.08 6.8
 -3 8 -2 157.66 6.73
 3 8 2 148.74 6.94
 3 8 2 164.04 7.01
 3 8 2 150.63 6.81
 3 -8 -2 151.4 6.72
 4 -8 2 6.74 1.01
 4 -8 2 6.64 1.01
 4 8 -2 3.52 0.86
 4 -8 2 6.32 0.92
 4 8 -2 5.52 0.93
 4 -8 2 6.78 1.02
 -4 -8 -2 5.57 0.98
 -4 8 2 6.18 1.03
 4 8 2 7.43 1.21
 -4 -8 2 5.91 0.99
 4 -8 -2 6.89 1.07
 4 8 2 5.45 1.06
 4 -8 -2 5.16 0.92
 4 -8 -2 4.45 0.88
 4 8 2 6.17 1.07
 4 -8 -2 6.31 1.05
 -4 8 -2 5.36 0.95
 -5 8 2 179.06 8.02
 5 -8 2 181.92 7.95
 5 8 -2 189.89 8.31
 5 -8 2 179 7.95
 -5 -8 -2 181.06 8.08
 5 -8 2 173.57 7.94
 5 8 -2 186.08 8.13
 5 -8 2 178.62 7.81
 -5 8 -2 172.56 7.96
 5 -8 -2 183.12 7.89
 5 -8 -2 185.59 8.07
 -5 -8 2 188.95 8.04
 5 8 2 189.95 8.39
 5 -8 -2 182.01 8.05
 5 8 2 177.13 8.28
 5 8 2 177.68 8.13
 5 -8 -2 191.36 8.11
 6 8 -2 0.12 0.63
 6 8 -2 -0.35 0.59
 6 -8 2 0.47 0.6
 6 -8 2 0.23 0.67
 6 8 -2 0.82 0.76
 6 -8 2 0.15 0.57
 6 -8 2 0.56 0.62
 -6 8 2 0.1 0.62
 -6 -8 -2 0.98 0.74
 6 -8 -2 0.77 0.66
 6 8 2 0.57 0.71
 6 -8 -2 -0.23 0.51
 6 -8 -2 0.59 0.67
 6 -8 -2 1.65 0.8
 -6 -8 2 0.17 0.63
 6 8 2 0.96 0.74
 6 8 2 0.31 0.67
 -6 8 -2 0.41 0.63
 7 -8 2 120.72 6.18
 7 -8 2 135.47 6.35
 7 8 -2 126.54 6.47
 7 8 -2 117.42 6.49
 7 -8 2 130.38 6.26
 7 8 -2 116.31 6.44
 -7 8 2 130.53 6.32
 -7 -8 -2 136.84 6.41
 7 -8 2 138.36 6.22
 -7 -8 2 130.61 6.28
 7 8 2 140.23 6.59
 7 8 2 131.31 6.66
 7 8 2 131.15 6.62
 -7 8 -2 132.58 6.31
 7 -8 -2 139.24 6.33
 7 -8 -2 134.64 6.35
 7 -8 -2 128.97 6.32
 7 -8 -2 121.62 6.3
 -8 8 2 -0.74 0.51
 8 -8 2 0.81 0.74
 8 8 -2 -0.04 0.72
 8 -8 2 -0.56 0.79
 8 8 -2 0 0.56
 -8 -8 -2 -0.89 0.6
 8 8 -2 -0.44 0.59
 8 8 2 0.31 0.72
 8 -8 -2 0.98 0.72
 8 -8 -2 0.11 0.86
 8 8 2 1.92 0.88
 8 -8 -2 -0.36 0.61
 8 8 2 0.06 0.73
 -8 8 -2 0.43 0.69
 8 -8 -2 0.11 0.79
 -9 -8 -2 83.56 4.62
 9 8 -2 64.88 4.49
 9 8 -2 74.07 4.68
 9 8 -2 71.36 4.46
 9 -8 2 70.49 4.3
 9 -8 2 69.79 4.29
 -9 8 2 71.76 4.3
 -9 8 -2 69.98 4.26
 9 8 2 72.47 4.61
 9 -8 -2 74.37 4.4
 9 -8 -2 76.45 4.38
 9 8 2 66.07 4.53
 9 -8 -2 68.41 4.36
 9 8 2 71.82 4.51
 9 -8 -2 68.65 4.29
 10 8 -2 5.49 1.45
 -10 8 2 3.12 1.2
 10 8 -2 3.28 1.42
 10 -8 2 8.03 1.61
 10 8 -2 4.18 1.35
 10 -8 -2 9.77 1.7
 10 8 2 5.87 1.55
 10 8 2 5.73 1.58
 -10 8 -2 9.04 1.63
 10 8 2 6.12 1.55
 10 -8 -2 6.42 1.51
 -11 8 2 8.39 1.73
 11 8 -2 14.43 2.38
 11 8 -2 9.61 2.04
 11 8 -2 11.82 2.34
 11 -8 2 17.38 1.98
 11 8 2 12.6 2.18
 11 -8 -2 17.51 2.2
 11 8 2 10.99 2.11
 11 8 2 8.68 2.06
 11 -8 -2 12.96 2.14
 -11 8 -2 17.65 2.09
 12 8 -2 1.43 1.3
 12 -8 2 1.32 1.29
 12 8 -2 0.09 1.17
 12 8 -2 0.84 1.54
 12 8 2 1.08 1.41
 12 8 2 0.97 1.27
 12 -8 -2 3.18 1.27
 -12 8 -2 0.78 0.89
 12 -8 -2 0.59 1.12
 12 8 2 0.81 1.32
 13 8 -2 4.37 1.86
 13 -8 2 3.17 1.67
 13 8 -2 3.42 1.65
 13 8 -2 2.45 1.73
 13 8 2 3.46 1.74
 13 -8 -2 4.81 1.64
 13 8 2 6.33 2.04
 13 8 2 7.83 2.1
 -13 8 -2 5.93 1.73
 14 8 -2 -0.21 1.33
 14 8 -2 0.5 1.47
 14 8 -2 0.51 1.33
 14 -8 -2 -1.92 1.07
 14 8 2 1.21 1.66
 14 8 2 1.96 1.62
 14 -8 -2 0.93 1.52
 14 8 2 -1.75 1.47
 -14 8 -2 -0.66 1.39
 15 -8 -2 17.06 3.12
 0 -9 -2 0.07 0.43
 0 9 -2 -0.19 0.41
 0 9 2 -0.05 0.43
 0 9 2 -0.1 0.36
 0 -9 2 -0.4 0.37
 0 -9 2 0.2 0.39
 0 -9 -2 -0.07 0.46
 0 9 2 -0.03 0.44
 0 9 -2 -0.4 0.28
 0 9 -2 -0.01 0.35
 -1 -9 -2 5.51 0.92
 1 -9 2 4.22 0.73
 -1 -9 -2 4.31 0.83
 -1 9 2 4.93 0.87
 1 -9 2 4.42 0.77
 1 9 -2 5.49 0.92
 1 9 -2 4.38 0.83
 -1 9 2 5.8 0.93
 1 9 -2 5.37 0.86
 -1 9 2 5.17 0.9
 1 9 2 4.63 0.84
 -1 -9 2 3.46 0.71
 -1 9 -2 4.37 0.82
 -1 9 -2 3.08 0.69
 -1 -9 2 4.66 0.79
 1 -9 -2 5.25 0.9
 1 9 2 3.04 0.77
 1 9 2 5.08 0.9
 -1 9 -2 4.69 0.79
 1 -9 -2 4.71 0.85
 -2 -9 -2 14.09 1.31
 -2 9 2 12.37 1.22
 -2 9 2 14 1.34
 2 -9 2 14.03 1.29
 -2 -9 -2 11.36 1.24
 2 -9 2 11.33 1.11
 2 9 -2 14.59 1.26
 2 9 -2 11.79 1.2
 -2 9 2 15.08 1.35
 2 9 -2 14.74 1.31
 2 -9 -2 11.8 1.27
 2 -9 -2 13.24 1.29
 2 9 2 13.35 1.34
 2 9 2 12.05 1.38
 -2 9 -2 13.64 1.25
 -2 9 -2 12.59 1.26
 -2 -9 2 11.54 1.19
 2 9 2 12.13 1.33
 -2 -9 2 13.43 1.23
 -2 9 -2 12.25 1.18
 -3 -9 -2 0.33 0.48
 -3 9 2 -0.31 0.44
 3 -9 2 0.26 0.47
 3 -9 2 -0.02 0.46
 -3 9 2 0.69 0.54
 3 -9 2 0.19 0.47
 3 9 -2 0.5 0.41
 3 9 -2 -0.45 0.44
 3 -9 2 0.53 0.49
 -3 9 -2 0.07 0.44
 -3 -9 2 -0.12 0.49
 3 -9 -2 0.24 0.48
 3 -9 -2 -0.19 0.44
 3 9 2 -0.07 0.56
 3 9 2 1.01 0.61
 3 9 2 -0.53 0.5
 -3 9 -2 0.65 0.56
 4 -9 2 8.96 1.12
 4 -9 2 8 1.14
 4 9 -2 10.5 1.24
 -4 9 2 11.71 1.29
 -4 -9 -2 6.97 1.19
 4 -9 2 9.78 1.22
 4 -9 2 11.79 1.25
 4 9 2 11.76 1.41
 -4 -9 2 13.25 1.33
 4 -9 -2 9.64 1.2
 4 9 2 10.62 1.35
 4 -9 -2 7.91 1.11
 4 -9 -2 9.73 1.21
 -4 9 -2 10.22 1.23
 4 9 2 10.53 1.36
 4 -9 -2 9.7 1.21
 5 -9 2 3.2 0.93
 -5 -9 -2 2.11 0.81
 -5 9 2 1.62 0.7
 5 9 -2 1.88 0.96
 5 -9 2 2.41 0.78
 5 9 -2 1.81 0.83
 5 -9 2 2.32 0.78
 5 -9 2 4.41 1
 5 9 2 4.04 1.08
 5 9 2 2.11 0.84
 5 -9 -2 2.69 0.87
 5 -9 -2 2.29 0.82
 -5 9 -2 2.06 0.79
 5 9 2 1.58 0.83
 5 -9 -2 3.68 0.93
 5 -9 -2 2.58 0.81
 -5 -9 2 3.82 0.95
 6 9 -2 51.48 3.26
 6 -9 2 53.92 3.18
 6 -9 2 53.77 3.15
 6 -9 2 44.15 3.03
 -6 9 2 57.91 3.27
 6 9 -2 50.94 3.31
 6 -9 2 53.58 3.2
 -6 -9 -2 54.68 3.3
 6 -9 -2 50.53 3.07
 -6 -9 2 50.44 3.13
 6 9 2 50.75 3.35
 -6 9 -2 46.88 3.06
 6 -9 -2 50.33 3.21
 6 -9 -2 50.04 3.19
 6 9 2 49.55 3.37
 6 9 2 58.2 3.49
 6 -9 -2 52.65 3.19
 -7 -9 -2 -0.02 0.73
 7 -9 2 -0.01 0.63
 7 9 -2 0.86 0.77
 7 9 -2 -0.44 0.63
 -7 9 2 -0.16 0.74
 7 -9 2 -0.03 0.75
 7 9 -2 1.6 0.91
 7 -9 -2 1.61 0.9
 7 -9 -2 1.33 0.81
 -7 9 -2 0.15 0.69
 7 -9 -2 1.32 0.76
 7 9 2 1.28 0.78
 7 -9 -2 0.87 0.82
 7 9 2 0.07 0.68
 7 9 2 0.97 0.75
 -8 9 2 28.88 2.38
 8 -9 2 25.97 2.29
 8 9 -2 29.49 2.57
 8 9 -2 28.6 2.51
 8 -9 2 25.39 2.4
 -8 -9 -2 32.91 2.68
 8 9 -2 24.14 2.38
 8 -9 -2 23.35 2.25
 8 9 2 29.97 2.58
 8 -9 -2 32 2.61
 8 9 2 24.06 2.47
 8 -9 -2 29.03 2.38
 -8 9 -2 28.58 2.34
 8 -9 -2 29.83 2.41
 8 9 2 25.67 2.44
 -9 9 2 -0.23 0.68
 9 9 -2 -0.25 0.77
 9 -9 2 -0.23 0.81
 9 9 -2 0.34 0.85
 9 9 -2 1.42 0.79
 9 -9 2 -0.79 0.69
 9 9 2 0.23 0.83
 9 -9 -2 0.38 0.81
 -9 9 -2 0.9 0.74
 9 -9 -2 -1.51 0.7
 9 9 2 -0.14 0.87
 9 9 2 -1.11 0.73
 10 9 -2 8.14 1.77
 10 -9 2 6.81 1.48
 10 9 -2 7.76 1.75
 -10 9 2 8.27 1.6
 10 9 -2 6.41 1.65
 10 -9 -2 6.15 1.59
 10 9 2 5.78 1.56
 -10 9 -2 8.59 1.6
 10 9 2 5.96 1.66
 10 9 2 7.18 1.67
 10 -9 -2 7.13 1.48
 11 9 -2 3 1.4
 11 9 -2 5.39 1.57
 11 -9 2 2.73 1.2
 11 9 -2 5.92 1.82
 -11 9 2 3.11 1.33
 11 -9 -2 3.31 1.53
 -11 9 -2 4.05 1.34
 11 9 2 3.09 1.34
 11 -9 -2 1.46 1.08
 11 9 2 6.01 1.67
 11 9 2 2.09 1.34
 12 -9 2 0.01 1.05
 12 9 -2 -0.75 1
 -12 9 2 0.02 0.99
 12 9 -2 1.09 1.3
 12 9 -2 1.15 1.51
 12 9 2 -0.36 1.21
 12 -9 -2 0.85 1.08
 -12 9 -2 0.23 0.97
 12 9 2 0.85 1.23
 12 9 2 -1.65 0.83
 13 -9 2 1.57 1.44
 13 9 -2 1.73 1.52
 13 9 -2 -1.51 1.4
 13 9 -2 0.06 1.32
 -13 9 -2 -0.51 1.13
 13 9 2 0.75 1.44
 13 9 2 1.99 1.43
 13 -9 -2 -1.86 1.11
 13 9 2 -0.05 1.26
 14 9 -2 -1.81 1.39
 14 9 -2 -0.2 1.39
 14 -9 2 0.64 1.62
 14 9 -2 0.37 1.54
 14 9 2 -1.86 1.57
 14 -9 -2 -0.36 1.38
 -14 9 -2 -1.54 1.2
 14 9 2 1.63 1.66
 14 9 2 0.39 1.68
 0 -10 2 52.64 2.7
 0 10 -2 55.35 2.84
 0 10 -2 49.36 2.75
 0 -10 -2 44.08 2.71
 0 -10 -2 52.24 2.84
 0 10 -2 49.03 2.77
 0 10 2 50.5 2.91
 0 -10 2 48.96 2.71
 0 10 2 48.05 2.81
 0 10 2 47.92 2.76
 1 -10 2 9.64 1.12
 -1 10 2 11.37 1.26
 -1 10 2 10.15 1.18
 1 10 -2 11.22 1.2
 1 10 -2 13.56 1.34
 -1 10 2 12.91 1.33
 -1 -10 -2 12.5 1.22
 1 10 -2 11.45 1.19
 1 -10 2 13.66 1.2
 -1 -10 -2 12.23 1.3
 1 -10 -2 13.76 1.26
 1 10 2 10.63 1.23
 1 10 2 10.82 1.32
 -1 -10 2 11.59 1.21
 -1 10 -2 11.28 1.2
 1 -10 -2 11.93 1.24
 -1 10 -2 13.7 1.26
 1 10 2 13.06 1.34
 -1 -10 2 12.34 1.17
 -1 10 -2 11.96 1.15
 -2 10 2 2.32 0.77
 -2 -10 -2 0.82 0.57
 2 10 -2 1.35 0.58
 2 -10 2 1.11 0.53
 -2 10 2 1.58 0.66
 2 -10 2 2.21 0.66
 -2 10 2 0.79 0.52
 2 10 -2 0.63 0.51
 -2 -10 -2 1.87 0.74
 -2 -10 2 1.31 0.57
 2 -10 -2 1.52 0.62
 2 10 2 -0.26 0.51
 -2 10 -2 1.03 0.54
 -2 10 -2 0.64 0.44
 2 10 2 2.06 0.77
 2 -10 -2 1.67 0.65
 2 10 2 1.71 0.66
 -2 10 -2 1.72 0.61
 -2 -10 2 1.89 0.62
 -3 -10 -2 181.27 7.8
 -3 10 2 169.96 7.74
 3 -10 2 183.66 7.62
 3 -10 2 177.6 7.65
 3 -10 2 178.7 7.63
 -3 10 2 163.01 7.66
 3 -10 2 170.9 7.43
 3 10 -2 171.73 7.73
 -3 10 -2 170.52 7.68
 -3 -10 2 182.11 7.69
 3 10 2 171.57 7.92
 3 10 2 173.62 7.97
 3 -10 -2 177.47 7.74
 3 10 2 181.22 7.87
 3 -10 -2 172.75 7.73
 -3 10 -2 179.31 7.69
 -4 10 2 1.43 0.61
 -4 -10 -2 1.32 0.69
 4 -10 2 0.65 0.59
 4 10 -2 0.75 0.65
 4 -10 2 0.23 0.52
 4 -10 2 1.09 0.64
 4 -10 2 1.79 0.68
 4 -10 -2 0.32 0.59
 -4 10 -2 1.4 0.66
 4 10 2 0.89 0.69
 4 10 2 0.88 0.68
 4 -10 -2 0.48 0.57
 4 10 2 0.64 0.72
 4 -10 -2 2.15 0.75
 -4 -10 2 1.09 0.64
 5 -10 2 168.46 7.69
 5 -10 2 178.93 7.62
 -5 -10 -2 173.11 7.87
 5 -10 2 165.66 7.67
 5 10 -2 175.74 7.95
 -5 10 2 154.01 7.7
 5 -10 2 158.47 7.63
 5 10 -2 173.62 8.07
 5 -10 -2 165.32 7.61
 -5 -10 2 179.53 7.8
 5 10 2 180.43 8.14
 5 -10 -2 191.65 7.89
 5 10 2 170.25 7.94
 5 10 2 167.4 8.08
 -5 10 -2 173.62 7.8
 5 -10 -2 179.04 7.86
 5 -10 -2 178.21 7.85
 -6 10 2 0.33 0.65
 6 10 -2 1.25 0.7
 6 -10 2 0.32 0.59
 -6 -10 -2 1.9 0.85
 6 10 -2 1.82 0.77
 6 -10 2 -0.01 0.65
 -6 10 -2 0.86 0.57
 6 -10 -2 0.62 0.71
 6 10 2 0.39 0.67
 6 10 2 0.27 0.69
 6 10 2 0.41 0.71
 6 -10 -2 1.15 0.82
 6 -10 -2 0.09 0.63
 6 -10 -2 1.21 0.73
 -7 -10 -2 160.72 7.47
 7 10 -2 138.32 7.39
 7 10 -2 152.69 7.63
 7 -10 2 149.79 7.27
 7 -10 2 154.59 7.26
 7 10 -2 171.38 7.81
 -7 10 2 149.71 7.3
 7 -10 -2 155.5 7.24
 7 10 2 150.83 7.66
 7 -10 -2 158.67 7.4
 7 10 2 145.43 7.62
 7 -10 -2 150.47 7.32
 -7 10 -2 155.02 7.34
 7 -10 -2 158.5 7.45
 7 10 2 153.03 7.54
 8 10 -2 0.41 0.63
 8 -10 2 1.04 0.78
 8 10 -2 0.78 0.9
 8 -10 2 0.4 0.92
 -8 10 2 0.15 0.7
 8 10 -2 0.16 0.67
 8 -10 -2 1.36 0.94
 8 10 2 0.11 0.71
 -8 10 -2 0.25 0.74
 8 10 2 0.96 0.85
 8 -10 -2 0.86 0.8
 8 -10 -2 0.91 0.72
 8 10 2 -1.01 0.66
 9 10 -2 90.97 5.58
 9 10 -2 95.36 5.79
 9 10 -2 105.93 5.94
 -9 10 2 105.25 5.59
 9 -10 2 86.15 5.25
 9 10 2 93.86 5.74
 9 10 2 93.65 5.64
 9 -10 -2 102.27 5.52
 9 -10 -2 91.58 5.41
 9 10 2 105.13 5.88
 -9 10 -2 107.44 5.62
 -10 10 2 4.26 1.26
 10 -10 2 6.9 1.56
 10 10 -2 4.92 1.59
 10 10 -2 7.49 1.73
 10 10 -2 4.18 1.49
 -10 10 -2 5.35 1.42
 10 -10 -2 5.67 1.55
 10 10 2 5.86 1.64
 10 10 2 3.38 1.35
 10 10 2 4.48 1.51
 10 -10 -2 5.26 1.51
 11 -10 2 16.16 2.25
 11 10 -2 17.43 2.69
 -11 10 2 17.18 2.28
 11 10 -2 18.47 2.51
 11 10 -2 16.01 2.63
 11 -10 -2 17.15 2.55
 11 10 2 24.86 2.87
 11 10 2 15.89 2.47
 -11 10 -2 16.64 2.28
 11 10 2 19.39 2.89
 11 -10 -2 16.58 2.54
 12 10 -2 4.96 1.79
 12 -10 2 2.33 1.37
 12 10 -2 0.41 1.25
 -12 10 2 3.22 1.43
 12 10 -2 2.88 1.44
 12 -10 -2 3.67 1.68
 -12 10 -2 2.27 1.24
 12 10 2 3.27 1.77
 12 10 2 0.45 1.31
 12 10 2 4.23 1.78
 13 10 -2 6.09 2.02
 13 10 -2 3.56 1.87
 13 10 -2 3.07 1.76
 13 -10 2 1.54 1.26
 13 10 2 2.82 1.7
 13 10 2 4.01 1.72
 13 -10 -2 4.8 1.73
 -13 10 -2 3.33 1.47
 13 10 2 3.88 1.73
 14 10 -2 -0.53 1.49
 14 -10 2 -0.5 1.59
 14 10 -2 1.42 1.84
 14 10 2 -1.56 1.78
 14 10 2 -1.99 1.85
 14 10 2 -4.3 1.47
 -14 10 -2 1.22 1.47
 14 -10 -2 0.84 1.65
 0 11 -2 -0.35 0.47
 0 -11 2 0.6 0.49
 0 11 2 0.02 0.51
 0 -11 -2 0.08 0.5
 0 11 -2 -0.38 0.37
 0 -11 -2 -0.14 0.46
 0 11 2 0.42 0.55
 0 -11 2 0.13 0.47
 0 11 -2 -0.22 0.37
 0 11 2 0.08 0.51
 1 11 -2 8.64 1.23
 -1 11 2 6.51 1.12
 -1 11 2 9.23 1.33
 -1 -11 -2 7.09 1.17
 1 -11 2 7.94 1.09
 -1 -11 -2 8.18 1.25
 1 -11 2 6.27 1
 -1 11 2 7.94 1.26
 1 11 -2 9.52 1.24
 1 -11 -2 8.65 1.25
 -1 11 -2 8.49 1.11
 1 11 2 9.87 1.33
 1 -11 -2 9.27 1.28
 -1 -11 2 8.55 1.08
 1 11 2 8.38 1.27
 -1 -11 2 10.02 1.2
 1 11 2 6.32 1.14
 -1 11 -2 10.27 1.15
 -2 11 2 15.57 1.5
 2 11 -2 19.58 1.65
 2 -11 2 18.19 1.57
 -2 11 2 17.88 1.63
 -2 11 2 16.26 1.59
 2 -11 2 15.31 1.45
 -2 -11 -2 16.01 1.54
 -2 -11 -2 17.51 1.61
 2 11 2 17.95 1.67
 2 11 2 19.89 1.69
 2 11 2 16.35 1.65
 -2 11 -2 17.75 1.51
 -2 -11 2 16.18 1.54
 -2 11 -2 14.65 1.49
 2 -11 -2 14.95 1.55
 2 -11 -2 16.04 1.5
 -2 -11 2 12.44 1.42
 3 11 -2 0.66 0.58
 3 -11 2 0.31 0.61
 -3 11 2 2.06 0.83
 3 -11 2 1.64 0.65
 -3 11 2 2.29 0.72
 3 -11 2 1.63 0.68
 3 -11 2 0.85 0.61
 -3 -11 -2 1.72 0.74
 3 -11 -2 -0.22 0.5
 -3 -11 2 0.23 0.57
 3 11 2 2.37 0.82
 3 11 2 1.29 0.8
 3 11 2 2.05 0.8
 -3 11 -2 0.63 0.62
 3 -11 -2 1.34 0.76
 -3 11 -2 1.42 0.66
 4 -11 2 22.31 1.82
 4 11 -2 23.14 1.99
 -4 11 2 18.47 1.82
 4 -11 2 21.73 1.78
 4 -11 2 21.65 1.83
 -4 -11 -2 23.3 1.93
 -4 11 -2 25.29 1.97
 4 -11 -2 22.74 1.91
 -4 -11 2 23.26 1.87
 4 11 2 23.45 2.08
 4 11 2 19.41 1.94
 4 -11 -2 19.77 1.8
 -4 11 -2 20.75 1.81
 4 -11 -2 19.09 1.87
 4 11 2 22.13 2.12
 -5 -11 -2 0.26 0.71
 5 11 -2 0.35 0.56
 -5 11 2 -0.63 0.53
 5 -11 2 -0.64 0.62
 5 -11 2 -0.58 0.61
 -5 11 -2 -0.73 0.45
 5 -11 -2 -0.52 0.55
 5 11 2 -0.72 0.5
 5 11 2 -0.09 0.54
 5 -11 -2 0.97 0.72
 5 -11 -2 0.36 0.7
 5 11 2 0.13 0.6
 5 -11 -2 0.77 0.68
 -6 -11 -2 41.78 2.95
 6 -11 2 44.09 2.92
 6 11 -2 36.68 2.97
 6 11 -2 46.14 3.1
 -6 11 2 43.96 2.93
 6 -11 2 49.35 3
 6 -11 -2 42.04 2.98
 6 11 2 41.56 3.1
 6 -11 -2 43.91 2.99
 6 11 2 38.27 2.95
 6 -11 -2 46.26 2.96
 6 -11 -2 41.49 2.87
 -6 11 -2 40.57 2.82
 6 11 2 39.43 3.04
 7 11 -2 6.28 1.42
 7 11 -2 11.52 1.82
 -7 11 2 12.22 1.49
 -7 -11 -2 8.1 1.53
 7 -11 2 9.69 1.5
 7 11 -2 12.41 1.67
 7 -11 2 13.02 1.77
 -7 11 -2 9.16 1.55
 7 -11 -2 8.59 1.53
 7 -11 -2 8.09 1.52
 7 11 2 9.4 1.66
 7 -11 -2 8.13 1.58
 7 -11 -2 8.93 1.55
 7 11 2 7.8 1.53
 7 11 2 9.01 1.65
 -8 11 2 9.06 1.62
 8 11 -2 10.74 1.87
 8 -11 2 8.5 1.51
 8 11 -2 9.74 1.76
 8 11 -2 9.4 1.72
 8 -11 -2 11.1 1.74
 8 -11 -2 6.84 1.4
 8 11 2 7.28 1.58
 -8 11 -2 7.01 1.38
 8 11 2 10.71 1.94
 8 11 2 7.21 1.54
 9 -11 2 1.14 0.93
 9 11 -2 0.34 1.03
 -9 11 2 0.89 0.86
 9 11 -2 1.89 1.13
 9 11 -2 0.06 0.98
 9 11 2 -1.21 0.73
 -9 11 -2 0.9 0.81
 9 -11 -2 2.4 1.02
 9 -11 -2 0.3 0.89
 9 11 2 1.48 1.11
 9 11 2 2.44 1.07
 -10 11 2 6.26 1.44
 10 11 -2 6.67 1.6
 10 -11 2 6.02 1.51
 10 11 -2 4.6 1.54
 10 11 -2 7.61 1.84
 10 -11 -2 7.96 1.76
 10 -11 -2 5.84 1.56
 10 11 2 7.55 1.86
 -10 11 -2 6.9 1.45
 10 11 2 12.34 2.19
 10 11 2 10.63 2.16
 11 11 -2 0.43 1.3
 11 -11 2 1.91 1.12
 11 11 -2 0.21 1.37
 -11 11 2 0.85 1.13
 11 11 -2 0.36 1.23
 11 11 2 0.75 1.26
 -11 11 -2 2.16 1.09
 11 11 2 0.42 1.19
 11 11 2 3.77 1.45
 11 -11 -2 0.38 1.2
 12 11 -2 0.09 1.31
 12 -11 2 0.33 1.22
 12 11 -2 0.55 1.45
 -12 11 2 1.44 1.09
 12 11 -2 -0.6 1.25
 12 11 2 -0.11 1.3
 12 11 2 -0.6 1.18
 12 11 2 2.23 1.49
 -12 11 -2 -0.21 1.02
 12 -11 -2 0.55 1.12
 13 11 -2 2.35 1.6
 13 11 -2 -1.12 1.48
 13 -11 2 -0.29 1.24
 13 11 -2 0.26 1.6
 13 11 2 1.95 1.6
 13 11 2 2.16 1.64
 -13 11 -2 4.17 1.61
 13 11 2 1.58 1.68
 13 -11 -2 0.11 1.33
 14 -11 2 0.02 1.54
 14 11 -2 0.83 1.84
 -14 11 -2 -0.1 1.42
 14 11 2 -0.76 1.68
 0 12 -2 40.48 2.55
 0 12 2 45.59 2.73
 0 12 2 41.56 2.67
 0 12 2 37.82 2.54
 0 12 -2 38.58 2.52
 0 -12 -2 34.87 2.48
 0 -12 2 35.73 2.35
 0 -12 2 40.57 2.49
 0 -12 -2 40.51 2.54
 1 12 -2 4.53 0.97
 -1 12 2 4.6 1.01
 -1 12 2 4.24 0.98
 1 -12 2 3.73 0.86
 -1 12 2 3.94 0.91
 -1 -12 -2 4.52 0.98
 1 12 -2 3.93 0.98
 -1 -12 -2 4.38 0.96
 1 -12 2 1.93 0.74
 -1 -12 2 5.25 0.96
 1 12 2 3.45 0.95
 1 -12 -2 4.48 0.99
 -1 12 -2 3.81 0.87
 1 12 2 2.73 0.9
 1 12 2 1.07 0.7
 1 -12 -2 3.75 0.91
 -1 -12 2 5.11 0.94
 -1 12 -2 3.98 0.88
 2 -12 2 23.65 1.81
 -2 -12 -2 26.07 1.92
 -2 12 2 19.53 1.85
 -2 12 2 25.89 1.99
 2 12 -2 22.64 1.91
 -2 -12 -2 18.48 1.75
 -2 12 2 19.97 1.76
 2 12 2 21.76 1.88
 -2 12 -2 22.58 1.81
 2 -12 -2 22.18 1.86
 -2 -12 2 20.48 1.72
 2 -12 -2 20.64 1.83
 2 12 2 22.62 2.01
 -2 12 -2 20.9 1.8
 2 12 2 22.36 2.09
 3 -12 2 92.07 4.49
 3 12 -2 87.87 4.6
 -3 -12 -2 87.89 4.62
 3 -12 2 90.75 4.5
 -3 12 2 93.66 4.69
 -3 12 2 85.36 4.52
 -3 -12 -2 87.26 4.57
 -3 12 2 84.91 4.64
 -3 -12 2 81.95 4.47
 -3 12 -2 80.25 4.44
 3 -12 -2 91.35 4.56
 3 12 2 94.36 4.79
 -3 12 -2 91.67 4.54
 3 12 2 90.9 4.73
 3 12 2 83.3 4.72
 3 -12 -2 85.69 4.52
 4 -12 2 0.4 0.65
 4 12 -2 1.01 0.67
 -4 -12 -2 1.52 0.83
 -4 12 2 0.86 0.67
 -4 12 2 1.3 0.72
 4 -12 2 0.98 0.65
 4 -12 -2 1.22 0.69
 -4 12 -2 1.37 0.66
 -4 12 -2 1.26 0.61
 4 12 2 1.31 0.69
 4 12 2 0.87 0.71
 4 -12 -2 0.08 0.62
 4 12 2 1.05 0.56
 4 -12 -2 1.57 0.82
 5 -12 2 197.31 8.94
 5 12 -2 204.87 9.19
 -5 12 2 201.97 9.07
 -5 -12 -2 211.05 9.16
 5 -12 2 210.67 8.96
 5 12 2 208.69 9.44
 5 -12 -2 204.8 9.08
 5 12 2 177.79 9.21
 5 -12 -2 200.09 8.84
 5 -12 -2 200.6 9.01
 5 -12 -2 208.16 9.1
 -5 12 -2 183.6 8.94
 5 12 2 198.46 9.19
 6 12 -2 3.13 1.06
 -6 12 2 3.32 0.94
 6 12 -2 3.01 0.98
 6 -12 2 4.72 1.05
 6 -12 2 3.86 1.09
 6 -12 -2 1.76 0.83
 6 12 2 3.94 1.18
 6 -12 -2 3.2 1.1
 6 12 2 2.82 1.02
 -6 12 -2 4.05 1.07
 6 -12 -2 3.8 1.14
 6 12 2 4.55 1.23
 7 12 -2 170.55 7.78
 7 12 -2 155.77 7.72
 7 12 -2 152.98 7.76
 -7 12 2 145.71 7.37
 7 -12 2 154.4 7.33
 7 12 2 156.04 7.8
 7 12 2 143.74 7.68
 7 -12 -2 155.48 7.4
 -7 12 -2 140.29 7.28
 7 12 2 140.48 7.5
 7 -12 -2 148.92 7.4
 8 -12 2 0.11 0.77
 -8 12 2 0.59 0.81
 8 12 -2 1.8 0.94
 8 12 -2 -0.32 0.71
 8 12 -2 0.78 0.88
 8 12 2 0.39 0.89
 8 12 2 0.41 0.81
 8 12 2 0.29 0.89
 -8 12 -2 1.57 0.9
 8 -12 -2 -0.77 0.73
 8 -12 -2 0.88 0.86
 9 12 -2 69.12 4.89
 9 -12 2 73.18 4.54
 9 12 -2 81.35 5.06
 9 12 -2 78.21 4.89
 -9 12 2 74.59 4.62
 9 -12 -2 68.39 4.5
 -9 12 -2 75.44 4.61
 9 12 2 75.14 4.88
 9 -12 -2 70.28 4.51
 9 12 2 69.02 4.91
 9 12 2 73.65 4.95
 -10 12 2 4.63 1.37
 10 12 -2 2.25 1.32
 10 12 -2 3.1 1.49
 10 12 -2 3.47 1.55
 10 -12 2 5.84 1.43
 10 12 2 1.94 1.17
 10 -12 -2 3.69 1.32
 -10 12 -2 4.84 1.35
 10 12 2 2.57 1.43
 10 12 2 6.26 1.72
 -11 12 2 24.12 2.58
 11 12 -2 17.08 2.77
 11 12 -2 19.15 2.65
 11 -12 2 15.93 2.51
 11 12 -2 16.34 2.76
 11 12 2 16.54 2.71
 11 12 2 16.68 2.68
 11 12 2 20.26 2.74
 11 -12 -2 20.28 2.57
 -11 12 -2 18.62 2.47
 12 12 -2 -0.73 1.29
 12 12 -2 1.61 1.56
 12 12 -2 2.65 1.55
 12 -12 2 0.41 1.28
 12 -12 -2 1.51 1.39
 -12 12 -2 0.2 1.25
 12 12 2 0.64 1.19
 12 12 2 0.52 1.37
 12 12 2 2.03 1.49
 13 12 -2 -0.17 1.55
 13 12 -2 -0.23 1.46
 13 -12 2 -1.03 1.4
 13 12 -2 0.67 1.7
 13 12 2 0.87 1.61
 -13 12 -2 1.64 1.27
 13 12 2 2.49 1.54
 13 12 2 1.59 1.7
 13 -12 -2 0.45 1.49
 -14 12 -2 0.99 1.45
 14 12 2 1.68 1.78
 0 13 2 0.5 0.66
 0 13 -2 0.34 0.5
 0 13 -2 -0.4 0.54
 0 13 2 -0.23 0.57
 0 13 2 0.29 0.49
 0 -13 -2 0.03 0.63
 0 -13 -2 0.11 0.56
 0 -13 2 0.21 0.52
 -1 -13 -2 0.85 0.73
 1 13 -2 1.7 0.65
 -1 13 2 0.99 0.67
 -1 13 2 0.99 0.78
 1 -13 2 1.19 0.61
 1 13 -2 1.68 0.76
 -1 13 2 1.75 0.67
 -1 -13 -2 0.95 0.67
 1 -13 -2 2.81 0.89
 1 13 2 0.68 0.69
 1 13 2 1.5 0.69
 -1 13 -2 1.19 0.64
 -1 -13 2 1.31 0.69
 1 13 2 1.79 0.82
 1 -13 -2 1.29 0.77
 -1 13 -2 0.18 0.49
 2 -13 2 15.74 1.68
 -2 13 2 24.12 1.95
 2 13 -2 20.75 1.77
 -2 13 2 22.22 1.91
 -2 13 2 18.52 1.81
 2 13 -2 23.28 1.94
 -2 -13 -2 20.14 1.93
 -2 -13 -2 19.14 1.87
 2 -13 -2 21.75 1.88
 2 13 2 18.93 1.86
 2 13 2 22.23 1.96
 2 13 2 20.92 1.93
 2 -13 -2 22.7 1.96
 -2 -13 2 24.23 1.93
 -2 13 -2 21.78 1.81
 -2 13 -2 24.18 1.89
 -3 -13 -2 3.54 0.93
 3 13 -2 3.39 0.9
 -3 13 2 4.02 1.03
 -3 -13 -2 1.97 0.84
 3 -13 2 2.69 0.91
 -3 13 2 2.05 0.89
 -3 13 2 5.19 1.13
 3 -13 2 2.96 0.91
 -3 -13 2 2.33 0.83
 3 13 2 3.81 1.05
 -3 13 -2 1.96 0.77
 -3 13 -2 4 0.99
 3 -13 -2 2.8 0.9
 3 13 2 2.89 0.91
 3 -13 -2 3.06 0.88
 -4 13 2 18.25 1.81
 -4 13 2 16.22 1.75
 4 13 -2 18.46 1.84
 -4 -13 -2 18.43 1.88
 4 -13 2 14.64 1.68
 4 -13 2 18.21 1.73
 4 13 2 15.95 1.81
 4 13 2 16.47 1.81
 -4 13 -2 14.47 1.61
 4 -13 -2 16 1.71
 -4 13 -2 20.12 1.78
 4 13 2 15.31 1.75
 4 -13 -2 16.62 1.81
 4 -13 -2 13.5 1.58
 -5 13 2 0.56 0.7
 5 13 -2 2.08 0.87
 5 -13 2 1.62 0.72
 5 -13 -2 2.7 0.92
 5 13 2 3.33 1.08
 -5 13 -2 2.38 0.91
 5 -13 -2 3.59 1.09
 5 13 2 1.66 0.8
 5 13 2 3.8 1.15
 6 13 -2 10.49 1.74
 -6 13 2 9.17 1.55
 6 -13 2 10.12 1.53
 6 13 -2 9.6 1.64
 6 13 2 9.6 1.74
 6 -13 -2 8.53 1.51
 6 13 2 11.4 1.91
 -6 13 -2 8.06 1.46
 6 13 2 11.44 1.83
 6 -13 -2 11.06 1.73
 7 13 -2 -0.02 0.71
 -7 13 2 -0.17 0.64
 7 13 -2 -0.05 0.86
 7 -13 2 -0.27 0.61
 7 13 -2 0.09 0.73
 7 13 2 0.07 0.73
 7 -13 -2 -1 0.62
 -7 13 -2 0.13 0.67
 7 13 2 -1.36 0.63
 7 -13 -2 -0.39 0.66
 7 13 2 0.87 0.94
 -8 13 2 17.76 2.07
 8 13 -2 19.02 2.35
 8 13 -2 19.15 2.26
 8 13 -2 17.47 2.28
 8 -13 2 20.63 2.06
 8 13 2 21.44 2.46
 8 -13 -2 19.09 2.17
 8 13 2 18.62 2.34
 8 -13 -2 22.65 2.25
 8 13 2 18.78 2.31
 -8 13 -2 19.27 2.16
 9 13 -2 1.07 0.97
 9 -13 2 0.26 0.81
 9 13 -2 0.11 0.9
 9 13 -2 -0.54 0.89
 -9 13 2 0.09 0.8
 -9 13 -2 -0.12 0.83
 9 -13 -2 -1.09 0.77
 9 13 2 -0.02 1.06
 9 13 2 0 1.09
 9 13 2 1.31 1.01
 -10 13 2 13.01 2.07
 10 13 -2 13.25 2.36
 10 -13 2 9.36 1.78
 10 13 -2 10.9 2.18
 10 13 -2 12.31 2.28
 10 13 2 11.96 2.36
 -10 13 -2 10.41 1.99
 10 -13 -2 16.58 2.15
 10 13 2 10.55 2.29
 10 13 2 11.35 2.17
 11 13 -2 0.91 1.39
 -11 13 2 0.08 1.07
 11 13 -2 1.55 1.53
 11 13 -2 0 1.28
 11 -13 2 3.68 1.49
 11 13 2 0.51 1.56
 11 13 2 -0.23 1.34
 11 13 2 1.62 1.42
 -11 13 -2 1.25 1.25
 11 -13 -2 -0.28 1.07
 12 13 -2 -1.6 1.37
 12 13 -2 0.55 1.46
 12 -13 2 -0.22 1.27
 12 13 -2 -0.75 1.33
 12 13 2 -0.71 1.38
 -12 13 -2 -1.35 1.21
 12 -13 -2 -0.12 1.25
 12 13 2 -1.62 1.21
 12 13 2 1.18 1.34
 13 13 -2 0.3 1.81
 13 -13 2 1.76 1.68
 13 13 2 1.33 1.77
 13 13 2 -1.02 1.82
 -13 13 -2 -0.88 1.18
 13 13 2 -0.2 1.86
 13 -13 -2 0.37 1.39
 0 14 2 7.35 1.34
 0 14 2 10.32 1.56
 0 14 -2 8.24 1.32
 0 14 2 10.23 1.39
 0 -14 -2 10.4 1.42
 0 -14 2 9.27 1.39
 0 14 -2 10.23 1.47
 0 -14 -2 7.68 1.36
 -1 14 2 15.23 1.68
 -1 14 2 14.58 1.55
 1 14 -2 16.75 1.63
 1 14 -2 15.78 1.64
 -1 -14 -2 19.38 1.81
 1 -14 2 15.97 1.58
 -1 14 2 18.21 1.77
 -1 -14 -2 18.1 1.68
 -1 -14 2 17.46 1.66
 1 -14 -2 14.26 1.62
 1 14 2 18.52 1.78
 1 -14 -2 13.82 1.65
 1 14 2 14.73 1.59
 -1 14 -2 16.06 1.61
 1 14 2 17.3 1.75
 -1 14 -2 13.09 1.53
 -2 -14 -2 1.31 0.81
 -2 14 2 0.63 0.54
 2 -14 2 -0.07 0.6
 2 14 -2 0.65 0.58
 -2 14 2 0.64 0.63
 -2 -14 -2 0.76 0.65
 -2 14 2 -0.22 0.48
 2 14 -2 1.65 0.77
 -2 14 -2 0.43 0.58
 2 -14 -2 -0.19 0.75
 -2 14 -2 0.2 0.55
 -2 -14 2 0.58 0.61
 2 14 2 -0.68 0.45
 2 14 2 -0.04 0.65
 2 -14 -2 0.21 0.55
 2 14 2 0.55 0.63
 3 -14 2 73.62 3.89
 -3 14 2 71 4.01
 -3 14 2 61.42 3.88
 -3 -14 -2 67.65 3.95
 -3 14 2 65.6 3.89
 3 14 -2 65.95 3.96
 -3 14 -2 63.91 3.85
 3 -14 -2 67.32 3.86
 -3 14 -2 72.35 3.94
 3 14 2 68.03 4.13
 -3 -14 2 67.95 3.85
 3 14 2 61.82 3.98
 3 14 2 67.28 3.98
 -4 14 2 -0.68 0.57
 -4 -14 -2 -0.12 0.68
 4 -14 2 -0.97 0.57
 -4 14 2 0.67 0.73
 4 14 -2 0.85 0.63
 4 -14 -2 -0.67 0.73
 4 14 2 0.72 0.71
 -4 -14 2 0.49 0.68
 -4 14 -2 -0.64 0.49
 4 14 2 -0.52 0.67
 -4 14 -2 -0.4 0.56
 4 -14 -2 0 0.64
 4 14 2 0.08 0.71
 5 -14 2 48.68 3.2
 5 14 -2 48.97 3.43
 -5 14 2 47.9 3.31
 5 14 2 53 3.55
 5 14 2 47.92 3.52
 5 14 2 57.78 3.69
 5 -14 -2 54.98 3.47
 5 -14 -2 46.81 3.27
 -5 14 -2 56.61 3.44
 6 -14 2 -0.36 0.58
 6 14 -2 -0.27 0.78
 6 14 -2 1.27 0.84
 -6 14 2 0.6 0.74
 6 14 2 0.41 0.9
 6 -14 -2 1.83 0.88
 6 14 2 0.36 0.96
 -6 14 -2 1.1 0.81
 6 -14 -2 0.93 0.8
 6 14 2 0.2 0.72
 7 14 -2 97.46 5.57
 7 14 -2 95.92 5.49
 7 -14 2 91.58 5.09
 -7 14 2 91.82 5.26
 7 -14 -2 97.74 5.28
 7 14 2 85.1 5.48
 7 -14 -2 93.09 5.17
 7 14 2 86.95 5.43
 -7 14 -2 85.16 5.1
 7 14 2 86.93 5.35
 8 14 -2 -1.82 0.82
 8 14 -2 -0.16 0.92
 8 14 -2 -0.05 0.96
 -8 14 2 -0.59 0.77
 8 -14 2 -0.45 0.82
 8 14 2 0.79 1.1
 8 14 2 -0.18 0.84
 8 14 2 0.68 0.9
 8 -14 -2 -0.17 0.75
 -8 14 -2 0.47 0.84
 9 -14 2 59.66 4.04
 -9 14 2 57.11 4.06
 9 14 -2 63.39 4.53
 9 14 -2 56.84 4.33
 9 14 -2 57.16 4.31
 9 14 2 58.7 4.49
 9 -14 -2 51.26 3.92
 9 14 2 59.23 4.42
 -9 14 -2 59.05 4.11
 9 14 2 57.79 4.36
 10 14 -2 0.85 1.15
 10 14 -2 1.6 1.37
 -10 14 2 2.18 1.15
 10 14 -2 1.56 1.35
 10 -14 2 0.71 1.11
 10 14 2 0.47 1.12
 -10 14 -2 1 1.05
 10 14 2 3.77 1.61
 10 14 2 1.72 1.47
 10 -14 -2 2.47 1.27
 11 -14 2 12.07 2.22
 11 14 -2 7.04 2.04
 -11 14 2 6.63 1.95
 11 14 -2 7.77 2.17
 11 14 -2 12.18 2.41
 -11 14 -2 7.26 1.82
 11 -14 -2 5.65 1.84
 11 14 2 11.86 2.54
 11 14 2 11.49 2.41
 11 14 2 7.31 2.13
 12 -14 2 2.24 1.23
 12 14 -2 0.28 1.56
 12 14 -2 1.32 1.62
 12 14 -2 2.4 1.82
 12 14 2 3.52 1.7
 12 -14 -2 -0.44 1.32
 12 14 2 1.93 1.6
 -12 14 -2 1.43 1.25
 12 14 2 -0.25 1.32
 13 -14 2 2.48 1.65
 13 14 2 1.2 1.77
 13 -14 -2 4.03 1.86
 -13 14 -2 -0.08 1.63
 0 15 2 -0.51 0.62
 0 15 -2 0.26 0.58
 0 -15 -2 -0.03 0.63
 0 15 2 0.61 0.59
 0 -15 2 0.08 0.76
 0 15 2 -0.21 0.64
 0 15 -2 0.12 0.58
 1 15 -2 2.02 0.79
 -1 15 2 3.64 1.08
 1 15 -2 3.84 0.94
 1 -15 2 1.17 0.8
 -1 -15 -2 1.61 0.82
 -1 15 2 1.09 0.81
 -1 15 2 3.27 0.98
 1 15 2 0.9 0.7
 1 -15 -2 1.43 0.76
 1 15 2 1.66 0.84
 1 15 2 1.38 0.74
 -1 15 -2 1.33 0.68
 -1 15 -2 1.36 0.74
 -1 -15 2 2.28 0.89
 -2 15 2 23.53 2.09
 -2 15 2 26.56 2.29
 2 15 -2 26.87 2.22
 2 15 -2 25.53 2.21
 2 -15 2 23.73 2.03
 -2 15 2 24.6 2.26
 -2 -15 -2 28.22 2.27
 2 15 2 28.04 2.38
 -2 15 -2 23.1 2.05
 2 15 2 27.46 2.41
 -2 -15 2 23.75 2.07
 2 15 2 23.32 2.19
 2 -15 -2 27 2.18
 -2 15 -2 20.18 1.99
 3 -15 2 1.4 0.67
 -3 15 2 3.15 0.96
 -3 -15 -2 0.58 0.74
 -3 15 2 0.68 0.74
 3 15 -2 0.43 0.71
 3 15 -2 2.22 0.9
 -3 15 2 2.08 0.83
 3 15 2 1.7 0.87
 3 15 2 2.01 0.82
 -3 15 -2 1.32 0.78
 3 15 2 2.32 0.87
 3 -15 -2 1.56 0.79
 -3 -15 2 0.48 0.61
 -3 15 -2 1.8 0.87
 4 -15 2 12.11 1.61
 -4 -15 -2 12.3 1.58
 -4 15 2 15.23 1.75
 -4 15 2 18.37 1.92
 4 15 -2 14.18 1.78
 4 15 2 16.31 1.99
 -4 -15 2 16.15 1.72
 -4 15 -2 12.88 1.74
 4 -15 -2 15.2 1.85
 -4 15 -2 18.91 1.9
 4 -15 -2 15.49 1.74
 4 15 2 13.41 1.76
 5 -15 2 1.27 0.84
 5 15 -2 0.7 0.75
 -5 15 2 0.06 0.63
 5 15 2 0.44 0.84
 5 15 2 -0.98 0.65
 5 15 2 0 0.74
 5 -15 -2 -0.81 0.66
 5 -15 -2 -0.24 0.56
 -5 15 -2 0.02 0.66
 6 -15 2 40.45 2.95
 6 15 -2 38.04 3.16
 -6 15 2 42.24 3.13
 6 15 -2 38.51 3.19
 6 15 2 39.87 3.24
 6 15 2 40.07 3.19
 -6 15 -2 39.07 3
 6 -15 -2 39.55 2.98
 6 15 2 37.12 3.24
 6 -15 -2 39.43 3.01
 -7 15 2 -0.34 0.73
 7 15 -2 0.51 0.81
 7 15 -2 1.32 1.07
 7 -15 2 -0.12 0.86
 7 15 -2 0.28 0.9
 7 15 2 0.03 0.81
 -7 15 -2 0.28 0.85
 7 15 2 1.39 1.14
 7 15 2 1.5 1.1
 7 -15 -2 -0.53 0.72
 8 15 -2 62.43 4.51
 8 15 -2 58.7 4.32
 8 -15 2 65.44 4.13
 -8 15 2 61.36 4.2
 8 15 -2 63.91 4.58
 -8 15 -2 60.47 4.12
 8 15 2 62.7 4.59
 8 15 2 60.51 4.44
 8 15 2 61.43 4.5
 8 -15 -2 58.65 4.06
 9 15 -2 3.19 1.44
 9 -15 2 1.19 0.9
 9 15 -2 2.18 1.33
 -9 15 2 0.32 0.93
 9 15 -2 1.89 1.38
 9 15 2 0.62 1.15
 9 15 2 1.79 1.32
 -9 15 -2 1.3 1.09
 9 -15 -2 1.96 1.2
 9 15 2 2.53 1.43
 10 15 -2 11.18 2.36
 10 15 -2 10.12 2.32
 10 15 -2 16.17 2.84
 -10 15 2 14.23 2.4
 10 -15 2 14.53 2.32
 10 -15 -2 10.42 2.16
 10 15 2 12.94 2.42
 10 15 2 13.72 2.65
 -10 15 -2 18.18 2.37
 10 15 2 15.07 2.63
 -11 15 2 -0.77 1.21
 11 15 -2 0.47 1.36
 11 15 -2 0.86 1.44
 11 -15 2 0.24 1.29
 11 15 -2 -0.44 1.32
 11 -15 -2 0.33 1.25
 11 15 2 0.77 1.37
 11 15 2 1.76 1.49
 -11 15 -2 1.18 1.36
 11 15 2 2.51 1.72
 12 15 -2 0.28 1.54
 12 15 -2 0.64 1.61
 12 15 -2 2.22 1.89
 12 -15 2 -0.36 1.51
 12 15 2 0.89 1.67
 12 15 2 -1.31 1.41
 12 15 2 -0.44 1.49
 12 -15 -2 0.17 1.48
 -12 15 -2 1.6 1.76
 0 16 -2 0.76 0.68
 0 16 2 1.37 0.78
 0 -16 -2 0.51 0.7
 0 16 -2 2.15 0.87
 0 16 2 0.46 0.64
 0 -16 2 1.02 0.67
 0 16 2 1.57 0.8
 1 16 -2 7.44 1.32
 -1 -16 -2 4.7 1.12
 1 -16 2 7.52 1.28
 -1 16 2 4.65 1.18
 -1 16 2 4.46 1.2
 1 16 -2 5.52 1.21
 -1 16 2 5.33 1.22
 -1 16 -2 6.87 1.33
 1 16 2 5.66 1.28
 -1 16 -2 6.03 1.26
 1 -16 -2 7.47 1.37
 -1 -16 2 9.2 1.41
 1 16 2 3.65 1.07
 1 16 2 6.45 1.29
 2 16 -2 0.1 0.56
 -2 16 2 0.87 0.69
 2 -16 2 0.08 0.63
 -2 16 2 0.51 0.61
 2 16 -2 -1 0.56
 -2 -16 -2 0.17 0.67
 -2 16 2 1.3 0.83
 2 16 2 0.15 0.68
 -2 16 -2 0.77 0.67
 -2 16 -2 0.19 0.7
 2 16 2 -0.03 0.6
 2 -16 -2 -0.29 0.62
 -2 -16 2 0.3 0.62
 2 16 2 1.43 0.86
 -3 16 2 63.52 3.85
 3 16 -2 57.1 3.79
 3 16 -2 61.33 3.75
 -3 -16 -2 50.75 3.54
 3 -16 2 58.6 3.55
 -3 16 2 54.35 3.71
 -3 16 2 55.64 3.79
 3 16 2 63.5 3.87
 -3 16 -2 57.61 3.67
 3 16 2 63.48 3.96
 -3 16 -2 55.15 3.66
 3 16 2 55.39 3.82
 -3 -16 2 53.4 3.53
 3 -16 -2 61.84 3.69
 4 16 -2 0.71 0.73
 -4 16 2 2.61 0.98
 -4 16 2 0.6 0.98
 -4 -16 -2 0.95 0.96
 4 -16 2 1.71 0.83
 4 16 2 1.09 0.8
 -4 16 -2 1.63 0.8
 -4 -16 2 0.6 0.75
 4 -16 -2 1.22 0.88
 4 -16 -2 1.41 0.93
 4 16 2 1.12 0.91
 4 16 2 1.05 0.98
 -4 16 -2 1.42 0.82
 5 16 -2 38.13 3.01
 -5 16 2 37.77 2.93
 5 -16 2 33.98 2.73
 -5 -16 -2 36.6 2.94
 5 16 2 35.04 3.09
 -5 16 -2 42.48 3.03
 5 16 2 38.07 3.11
 5 16 2 35.34 3.04
 -5 -16 2 40.35 2.94
 5 -16 -2 40.15 3.02
 6 16 -2 -0.16 0.77
 -6 16 2 0.6 0.83
 6 16 -2 0.98 0.91
 6 -16 2 2.06 0.91
 -6 16 -2 0.66 0.86
 6 16 2 2.11 1.15
 6 -16 -2 0 0.71
 6 16 2 0.46 0.94
 6 16 2 0.84 0.86
 7 16 -2 66.76 4.61
 7 -16 2 72.14 4.41
 7 16 -2 73.34 4.86
 7 16 -2 72.54 4.79
 -7 16 2 74.09 4.65
 7 16 2 64.24 4.57
 7 16 2 70.71 4.86
 -7 16 -2 68.35 4.45
 7 16 2 67.18 4.74
 7 -16 -2 67.11 4.35
 -8 16 2 0.23 0.79
 8 16 -2 1.71 1.22
 8 16 -2 1.3 1.09
 8 16 -2 -0.23 1.07
 8 -16 2 0.98 1.08
 8 -16 -2 -0.49 0.96
 8 16 2 -0.03 1.09
 8 16 2 -0.96 1.23
 -8 16 -2 1.14 0.86
 8 16 2 0.02 1.07
 9 16 -2 44.89 3.97
 9 16 -2 46.4 3.99
 -9 16 2 50.83 3.92
 9 16 -2 47.99 4.04
 9 -16 2 48.42 3.62
 -9 16 -2 53.76 3.91
 9 -16 -2 41.76 3.59
 9 16 2 41.59 3.95
 9 16 2 45.85 4.07
 9 16 2 44.02 4.02
 10 16 -2 4.06 1.65
 10 16 -2 -0.57 1.13
 10 -16 2 1.75 1.48
 10 16 -2 1.81 1.33
 -10 16 2 -0.99 1.06
 10 16 2 1.53 1.44
 10 -16 -2 0.32 1.06
 10 16 2 0.66 1.33
 10 16 2 0.01 1.24
 -10 16 -2 0.52 1.28
 11 16 -2 1.34 1.71
 -11 16 2 4.14 1.64
 11 16 -2 2.4 1.72
 11 -16 2 3.36 1.57
 11 16 -2 1.07 1.39
 11 16 2 3.61 1.79
 11 16 2 3.28 1.71
 11 -16 -2 4.56 1.67
 -11 16 -2 3.04 1.6
 11 16 2 -0.17 1.48
 12 -16 -2 3.69 1.9
 -12 16 -2 1.49 1.67
 12 16 2 -0.27 1.86
 0 17 -2 1.18 0.73
 0 17 -2 0.63 0.69
 0 17 2 0.14 0.68
 0 17 2 0.91 0.71
 0 17 2 -0.72 0.65
 0 -17 2 -0.57 0.57
 0 -17 -2 0.62 0.75
 -1 17 2 7.64 1.5
 1 -17 2 9.74 1.53
 -1 -17 -2 6.55 1.34
 -1 17 2 8.97 1.62
 1 17 -2 9.65 1.55
 -1 17 2 7.03 1.51
 1 17 -2 7.24 1.4
 1 17 2 7.86 1.48
 -1 17 -2 9.25 1.51
 -1 -17 2 4.28 1.13
 -1 17 -2 9.61 1.59
 1 17 2 5.39 1.31
 1 17 2 10.58 1.66
 1 -17 -2 3.45 1.12
 -2 -17 -2 14.35 1.78
 2 -17 2 16.03 1.75
 -2 17 2 16.51 1.85
 -2 17 2 17.91 1.95
 -2 17 2 17.23 1.98
 2 17 -2 15.36 1.83
 2 17 -2 14.82 1.84
 -2 17 -2 19.29 1.92
 -2 -17 2 14.53 1.76
 2 17 2 16.83 1.93
 -2 17 -2 14.32 1.76
 2 17 2 18.57 2.15
 2 -17 -2 16.5 1.82
 2 17 2 17.27 2.02
 -3 17 2 1.3 0.91
 3 -17 2 1.06 0.77
 -3 17 2 -0.01 0.66
 3 17 -2 -0.08 0.7
 -3 -17 -2 -0.57 0.66
 3 17 -2 1.09 0.82
 -3 17 2 0.43 0.82
 -3 17 -2 0.29 0.68
 -3 -17 2 2.13 0.92
 3 17 2 0.07 0.76
 3 -17 -2 -0.16 0.6
 3 17 2 -0.47 0.73
 -3 17 -2 1.5 0.88
 3 17 2 0.07 0.77
 4 17 -2 52.54 3.68
 4 17 -2 48.3 3.51
 -4 -17 -2 51.98 3.58
 -4 17 2 55.57 3.65
 -4 17 2 50.13 3.61
 4 -17 2 49.24 3.38
 -4 -17 2 46.76 3.32
 -4 17 -2 48.82 3.53
 4 17 2 42.96 3.62
 4 17 2 52.16 3.61
 4 -17 -2 52.22 3.51
 4 17 2 52.07 3.71
 -4 17 -2 57.45 3.63
 5 -17 2 -0.06 0.76
 5 17 -2 -0.06 0.82
 -5 17 2 0.41 0.75
 5 17 -2 0.08 0.7
 -5 -17 -2 -0.42 0.69
 5 -17 -2 0.88 0.87
 5 17 2 0.36 0.93
 -5 17 -2 0.47 0.76
 -5 -17 2 0.94 0.89
 5 17 2 -0.76 0.88
 6 -17 2 70.94 4.25
 -6 17 2 67.74 4.39
 6 17 -2 63.14 4.5
 6 17 -2 64.19 4.44
 6 17 -2 68.04 4.54
 -6 -17 -2 69.59 4.42
 6 17 2 70.16 4.6
 -6 -17 2 68.24 4.33
 6 17 2 60.74 4.47
 6 -17 -2 65.53 4.28
 6 17 2 63.97 4.67
 -6 17 -2 58.92 4.17
 7 17 -2 0.66 0.93
 7 17 -2 2.39 1.22
 7 -17 2 1.5 0.97
 7 17 -2 0.64 1.2
 -7 17 2 -0.33 0.93
 7 -17 -2 1.02 0.98
 7 17 2 0.06 0.93
 -7 17 -2 0.39 1.03
 7 17 2 0.58 1.19
 7 17 2 0.53 0.92
 8 -17 2 59.63 4.14
 8 17 -2 63.5 4.55
 8 17 -2 59.42 4.65
 -8 17 2 60.99 4.31
 8 17 -2 65.3 4.78
 -8 17 -2 59.64 4.28
 8 17 2 56.73 4.48
 8 17 2 68.9 4.88
 8 -17 -2 59.33 4.31
 8 17 2 52.47 4.44
 9 17 -2 -0.27 1.2
 9 -17 2 0.3 1.03
 9 17 -2 -0.38 1.09
 -9 17 2 0.46 1.16
 9 17 -2 -0.13 1.3
 9 17 2 -0.86 1.23
 -9 17 -2 0.34 1.06
 9 17 2 -0.17 1.44
 9 17 2 0.14 1.15
 9 -17 -2 0.94 1.21
 10 17 -2 21.63 2.85
 -10 17 2 18.46 2.56
 10 -17 2 20.34 2.46
 10 17 -2 16.07 2.7
 10 17 -2 17.1 3.01
 -10 17 -2 16.4 2.61
 10 17 2 21.16 3.29
 10 17 2 23.58 3.19
 10 17 2 20.56 3.23
 10 -17 -2 20.8 2.7
 11 17 -2 1.91 1.75
 -11 17 2 1.78 1.46
 11 -17 -2 -1.32 1.5
 11 17 2 3.56 1.9
 11 17 2 1.93 1.81
 -11 17 -2 3.54 1.77
 11 17 2 2.21 1.93
 0 18 -2 1.2 0.9
 0 18 2 2.07 1.03
 0 18 2 3.53 1.22
 0 -18 -2 2.17 1.02
 0 18 -2 2.57 1.06
 0 -18 2 2.5 1.06
 0 18 2 1.19 0.92
 -1 -18 -2 2.96 1.06
 1 -18 2 3.18 1.01
 -1 18 2 2.49 1.03
 1 18 -2 2.59 1.03
 -1 18 2 2.7 1.06
 1 18 -2 2.96 1.03
 -1 18 2 4.61 1.33
 1 -18 -2 4.49 1.22
 1 18 2 3.83 1.25
 1 18 2 4.39 1.27
 -1 -18 2 4.27 1.17
 1 18 2 3.21 1.12
 -1 18 -2 1.62 0.91
 -1 18 -2 4.79 1.17
 2 18 -2 1.46 0.86
 -2 18 2 2.71 1.04
 2 18 -2 0.38 0.72
 -2 18 2 3 1.05
 -2 18 2 1.51 1
 2 -18 2 1.75 0.89
 -2 -18 -2 1.13 0.92
 2 18 2 0.64 0.82
 -2 18 -2 0.75 0.75
 -2 -18 2 0.53 0.76
 2 18 2 1.36 0.91
 2 18 2 1.38 1.04
 2 -18 -2 1 0.88
 -2 18 -2 1.61 0.94
 -3 -18 -2 38.61 3.07
 -3 18 2 40.36 3.22
 3 -18 2 36.68 2.9
 3 18 -2 38.43 3.19
 3 18 -2 42.47 3.24
 -3 18 2 46.66 3.4
 -3 18 2 41.98 3.23
 3 18 -2 35.97 3.08
 3 18 2 38.76 3.18
 -3 18 -2 38.02 3.15
 3 18 2 38.29 3.25
 3 -18 -2 40.58 3.02
 -3 -18 2 44.24 3.05
 3 18 2 39.01 3.3
 -3 18 -2 45.67 3.26
 -3 18 -2 38.63 3.08
 -4 -18 -2 2.95 1.17
 4 -18 2 2.25 1.06
 4 18 -2 2.83 1.16
 4 18 -2 2.17 1.05
 -4 18 2 1.16 0.88
 -4 18 2 2.12 1.14
 4 18 -2 1.59 1.08
 -4 -18 2 1.74 1.06
 -4 18 -2 2.21 1.08
 4 18 2 1.82 1.12
 4 18 2 0.73 1.05
 4 18 2 4.56 1.45
 4 -18 -2 2.14 1.06
 -4 18 -2 0.37 0.89
 5 18 -2 78.27 4.97
 5 -18 2 75.68 4.59
 5 18 -2 81.16 5
 -5 -18 -2 77.98 4.78
 -5 18 2 71.64 4.64
 -5 -18 2 74.48 4.6
 -5 18 -2 73.97 4.63
 5 18 2 78.5 5.16
 5 -18 -2 68.55 4.54
 5 18 2 76 4.81
 5 18 2 71.59 4.85
 6 -18 2 1.19 0.99
 -6 -18 -2 1.15 0.94
 -6 18 2 1.11 0.97
 6 18 -2 -0.09 1.15
 6 18 -2 1.09 1.34
 6 18 -2 0.29 0.99
 6 18 2 1.86 1.18
 6 -18 -2 -1.09 0.72
 -6 -18 2 1.49 0.95
 6 18 2 1.31 1.28
 -6 18 -2 0.26 1.1
 6 18 2 2.52 1.38
 7 18 -2 53.87 4.25
 -7 -18 -2 54.96 4.14
 7 18 -2 64.22 4.75
 -7 18 2 66.39 4.39
 7 18 -2 61.49 4.48
 7 -18 2 54.13 3.97
 7 18 2 60.26 4.51
 -7 18 -2 63.17 4.4
 7 -18 -2 59.13 4.19
 7 18 2 58.67 4.66
 -7 -18 2 65.43 4.36
 7 18 2 63.74 4.65
 8 -18 2 0.73 0.97
 8 18 -2 0.08 1.17
 8 18 -2 1.71 1.3
 -8 18 2 0.62 1.16
 8 18 -2 0.77 1.13
 -8 18 -2 0.36 1.02
 8 -18 -2 0.59 1.19
 8 18 2 -0.09 1.17
 8 18 2 1.29 1.38
 8 18 2 2.04 1.32
 9 18 -2 32.03 3.62
 -9 18 2 32.36 3.27
 9 18 -2 29.65 3.41
 9 18 -2 29.55 3.58
 9 -18 -2 38.96 3.44
 9 18 2 30.25 3.52
 9 18 2 32.91 3.51
 -9 18 -2 31.53 3.2
 9 18 2 38.99 3.81
 10 18 -2 -0.78 1.57
 10 18 -2 -0.2 1.62
 10 18 -2 1.56 1.73
 -10 18 2 -0.24 1.23
 10 18 2 1.69 1.6
 10 18 2 0.87 1.59
 10 -18 -2 0.24 1.33
 10 18 2 2.93 1.6
 -10 18 -2 3.17 1.5
 -11 18 2 6.86 2.14
 11 -18 -2 8.14 2.28
 -11 18 -2 5.29 2.03
 0 19 2 -0.14 0.79
 0 19 -2 0.1 0.79
 0 -19 2 0.63 0.8
 0 19 -2 -0.56 0.69
 0 -19 -2 -0.2 0.68
 0 19 2 0.1 1
 0 19 2 -0.41 0.96
 0 19 -2 0.7 0.78
 -1 19 2 3.89 1.34
 1 19 -2 1.95 1.11
 -1 -19 -2 3.92 1.17
 -1 19 2 4.02 1.38
 1 19 -2 3.32 1
 1 19 -2 2.64 1.25
 -1 19 2 2.86 1.16
 1 -19 2 5.58 1.27
 1 -19 -2 3.92 1.14
 1 19 2 4.48 1.25
 1 19 2 5.04 1.45
 -1 19 -2 2.76 0.98
 -1 -19 2 2.95 1.09
 -1 19 -2 3.25 1.11
 1 19 2 3.76 1.37
 -1 19 -2 3.41 1.26
 2 19 -2 11.6 1.89
 -2 19 2 10.37 1.94
 -2 19 2 15.15 1.95
 2 -19 2 12.87 1.75
 -2 19 2 10.97 1.93
 2 19 -2 13.29 2.09
 -2 -19 -2 14.64 2.13
 2 19 -2 14.29 1.87
 -2 19 -2 12.97 1.74
 2 19 2 8.64 1.71
 2 19 2 14 2.11
 -2 19 -2 12.21 1.95
 2 -19 -2 9.46 1.74
 2 19 2 11.13 2
 -2 -19 2 12.48 1.94
 -2 19 -2 13.02 1.76
 3 19 -2 0.18 0.84
 -3 19 2 -0.01 0.92
 3 19 -2 -0.95 0.83
 -3 19 2 2.11 1.01
 -3 -19 -2 -0.01 0.89
 3 -19 2 -0.08 0.78
 3 19 -2 -0.35 0.92
 -3 19 2 0.21 0.93
 -3 -19 2 0.16 0.71
 -3 19 -2 0.23 0.83
 -3 19 -2 0.95 0.95
 3 19 2 -0.29 0.94
 -3 19 -2 0.12 0.66
 3 19 2 -0.07 0.97
 3 19 2 0.9 0.94
 3 -19 -2 -0.12 0.83
 -4 19 2 47.75 3.86
 4 -19 2 59.2 3.79
 4 19 -2 59.11 3.98
 4 19 -2 50.94 3.92
 -4 -19 -2 49.33 3.71
 -4 19 2 56.12 3.92
 4 19 -2 49.5 3.94
 -4 19 -2 60.38 3.96
 4 -19 -2 49.05 3.66
 4 19 2 48.67 3.93
 -4 19 -2 56.31 3.96
 4 19 2 52.26 4.11
 -4 -19 2 55.61 3.79
 4 19 2 57.2 4.08
 5 19 -2 0.66 0.94
 5 -19 2 -1.83 0.72
 5 19 -2 0.27 1.05
 -5 19 2 -0.21 0.83
 5 19 -2 -0.39 0.97
 -5 -19 -2 0.35 0.9
 5 19 2 -0.23 1.06
 5 -19 -2 0.11 0.85
 -5 19 -2 0.1 0.91
 -5 -19 2 0.42 0.94
 5 19 2 -0.18 0.92
 5 19 2 1.19 1.14
 -6 19 2 32.37 3.16
 6 19 -2 36 3.42
 6 19 -2 34.71 3.39
 6 -19 2 36.54 3.02
 -6 -19 -2 36.64 3.21
 6 19 2 34.36 3.31
 -6 -19 2 31.62 2.98
 6 -19 -2 34.94 3.2
 6 19 2 39.55 3.43
 6 19 2 39.36 3.6
 -6 19 -2 38.74 3.26
 -7 -19 -2 -0.24 1.07
 7 19 -2 -0.01 1.08
 7 19 -2 -0.84 0.78
 -7 19 2 0.21 1.03
 7 19 -2 0.39 1.24
 -7 19 -2 -0.49 1.08
 7 19 2 0.76 1.32
 7 -19 -2 0.02 0.97
 7 19 2 0.47 1.22
 7 19 2 -0.56 1.01
 -8 -19 -2 44.73 3.83
 8 19 -2 44.17 4.14
 8 19 -2 53.07 4.31
 8 19 -2 47.45 4.09
 -8 19 2 43.36 3.94
 8 19 2 51.51 4.29
 8 19 2 46.56 4.13
 8 -19 -2 45.12 3.87
 -8 19 -2 43.7 3.71
 8 19 2 42.8 4.2
 -9 19 2 2.76 1.41
 9 19 -2 3.16 1.83
 9 19 -2 -0.58 1.5
 9 19 -2 0.72 1.4
 -9 19 -2 2.01 1.25
 9 19 2 0.96 1.6
 9 19 2 0.84 1.47
 9 -19 -2 -0.09 1.36
 9 19 2 -0.36 1.19
 -10 19 2 13.36 2.57
 10 19 2 14.32 2.69
 10 -19 -2 18.97 2.97
 -10 19 -2 11.64 2.36
 0 -20 2 6.04 1.41
 0 20 -2 7.06 1.53
 0 20 2 3.42 1.32
 0 20 2 5.06 1.62
 0 -20 -2 2.35 1.15
 0 20 -2 2.97 1.05
 0 20 -2 4.49 1.43
 0 20 2 2.86 1.21
 1 20 -2 4.38 1.3
 1 20 -2 2.18 1.26
 -1 -20 -2 3.55 1.2
 -1 20 2 2.64 1.29
 -1 20 2 1.78 1.19
 1 -20 2 2.43 1.09
 1 20 -2 5.14 1.32
 -1 20 2 4.08 1.53
 1 -20 -2 6.83 1.48
 -1 20 -2 2.57 1.08
 1 20 2 3.35 1.34
 1 20 2 5.2 1.58
 -1 20 -2 6.49 1.56
 -1 20 -2 5.43 1.41
 1 20 2 6.06 1.73
 -1 -20 2 2.5 1.11
 -2 20 2 1.27 1.07
 -2 20 2 2.16 1.23
 2 20 -2 0.88 1.01
 2 20 -2 -0.58 0.89
 -2 20 2 -0.63 0.82
 2 20 -2 1.49 0.99
 -2 -20 -2 2.59 1.07
 -2 20 -2 1.97 1.09
 2 20 2 -0.44 0.86
 -2 20 -2 1.77 1.03
 2 20 2 1.81 1.18
 2 20 2 0.71 1.02
 2 -20 -2 1.02 0.88
 -2 20 -2 1.07 1.11
 -2 -20 2 0.56 0.94
 3 20 -2 18.36 2.31
 3 20 -2 21.7 2.51
 -3 20 2 21.73 2.38
 -3 20 2 15.65 2.47
 -3 20 2 19.21 2.55
 3 20 -2 18.17 2.32
 -3 -20 -2 21.13 2.38
 3 -20 -2 17.72 2.14
 -3 20 -2 21.89 2.45
 3 20 2 18.06 2.35
 3 20 2 20.3 2.45
 -3 20 -2 23.13 2.4
 3 20 2 19.18 2.33
 -3 20 -2 20.68 2.29
 4 20 -2 0.7 1.13
 -4 20 2 -1.14 0.85
 4 20 -2 -0.68 0.75
 -4 20 2 0.21 0.95
 -4 -20 -2 2.04 1.12
 4 20 -2 0.72 1.06
 -4 20 -2 -0.35 1.1
 4 20 2 -1.21 0.99
 4 20 2 -1.67 1
 4 -20 -2 -0.43 0.94
 -4 20 -2 0.3 1.07
 4 20 2 0.6 1.24
 5 20 -2 48.18 3.95
 5 20 -2 46.04 3.64
 -5 -20 -2 40.49 3.44
 5 20 -2 37.4 3.55
 -5 20 2 39.03 3.39
 5 -20 -2 44.43 3.53
 5 20 2 39.61 3.66
 5 20 2 43.95 3.86
 5 20 2 43.36 3.66
 -5 20 -2 44.9 3.57
 6 20 -2 2.92 1.53
 -6 -20 -2 3.2 1.38
 6 20 -2 2.19 1.48
 -6 20 2 2.19 1.23
 6 20 -2 0.12 1.14
 6 -20 -2 -0.41 1.22
 6 20 2 0.4 1.18
 -6 20 -2 1.49 1.29
 6 20 2 2.35 1.33
 6 20 2 1.32 1.4
 -7 20 2 50.87 4.12
 7 20 -2 50.55 4.41
 7 20 -2 51.1 4.26
 -7 -20 -2 54.86 4.23
 7 20 -2 47.4 4.13
 7 -20 -2 54.11 4.1
 7 20 2 51.61 4.2
 7 20 2 52.19 4.44
 -7 20 -2 52.16 4.05
 7 20 2 50.35 4.25
 -8 20 2 -0.66 1.01
 8 20 -2 0.3 1.4
 8 20 -2 2.5 1.68
 -8 -20 -2 -1.53 1.22
 8 20 -2 0.07 1.34
 8 20 2 1.52 1.58
 8 20 2 -0.86 1.2
 8 -20 -2 -0.02 1.16
 -8 20 -2 0.22 1.11
 8 20 2 2.02 1.56
 -9 -20 -2 29.89 3.45
 -9 20 2 30.01 3.4
 9 20 2 30.19 3.77
 -9 20 -2 27.59 3.22
 9 -20 -2 27.51 3.36
 -10 20 2 0.15 1.44
 0 -21 -2 1.02 0.95
 0 21 2 -0.05 0.98
 0 21 -2 1.18 1.2
 0 21 2 -0.18 1
 0 21 -2 0.96 1
 0 21 2 1.01 1.04
 0 21 -2 0.23 0.87
 -1 21 2 5.22 1.5
 1 21 -2 4.05 1.44
 -1 21 2 4.05 1.55
 -1 -21 -2 5.52 1.46
 -1 21 2 2.84 1.26
 1 21 -2 3.85 1.28
 1 21 -2 6.01 1.51
 1 -21 -2 3.84 1.34
 1 21 2 7.02 1.71
 1 21 2 4.22 1.35
 -1 21 -2 5.52 1.38
 -1 21 -2 5.08 1.41
 -1 21 -2 3.77 1.49
 1 21 2 2.11 1.37
 -2 -21 -2 16.65 2.26
 -2 21 2 23.46 2.54
 2 21 -2 17.81 2.2
 -2 21 2 13.6 2.4
 2 21 -2 19.03 2.33
 -2 21 2 21.12 2.5
 2 21 -2 19.14 2.41
 -2 21 -2 17.05 2.18
 2 21 2 15.44 2.53
 2 -21 -2 22.55 2.38
 -2 21 -2 23.18 2.58
 2 21 2 16.39 2.56
 -2 21 -2 18.28 2.26
 2 21 2 16.29 2.28
 3 21 -2 0.49 0.92
 -3 21 2 0.46 1.19
 3 21 -2 1.23 1.14
 3 21 -2 -0.45 1.1
 -3 21 2 -0.36 0.91
 -3 -21 -2 0.37 0.98
 3 21 2 0.02 1.13
 3 21 2 -0.36 0.87
 3 21 2 0.96 1.21
 -3 21 -2 1.55 1.11
 3 -21 -2 1.49 0.96
 -3 21 -2 1.9 1.27
 -4 -21 -2 40.28 3.46
 4 21 -2 37.28 3.45
 -4 21 2 40.23 3.67
 4 21 -2 37.92 3.48
 -4 21 2 44.83 3.66
 4 21 -2 37.12 3.54
 4 -21 -2 33.8 3.33
 -4 21 -2 43.77 3.69
 -4 21 -2 44.02 3.57
 4 21 2 41.94 3.7
 4 21 2 31.82 3.51
 4 21 2 46.59 3.75
 5 21 -2 1.34 1.26
 5 21 -2 1.11 1.18
 -5 -21 -2 -1.23 1.01
 5 21 -2 0.64 1.34
 -5 21 2 -0.09 1.01
 5 -21 -2 -1.6 0.94
 5 21 2 -0.04 1.2
 5 21 2 0.71 1.2
 -5 21 -2 1.43 1.15
 5 21 2 0.05 1.24
 6 21 -2 25.16 3
 6 21 -2 29.25 3.09
 -6 21 2 21.23 2.79
 -6 -21 -2 26.39 2.87
 6 21 -2 19.26 3.04
 -6 21 -2 23.9 2.9
 6 21 2 36.21 3.5
 6 21 2 28.62 3.24
 6 -21 -2 27.69 2.99
 6 21 2 24.1 3.01
 7 21 -2 2.15 1.45
 -7 21 2 2.21 1.41
 -7 -21 -2 -0.16 1.12
 7 21 -2 0.06 1.27
 7 21 -2 0.93 1.43
 7 21 2 1.45 1.27
 -7 21 -2 -1.15 1.01
 7 -21 -2 -0.23 1.21
 7 21 2 -0.23 1.45
 7 21 2 -0.4 1.47
 8 21 -2 24.96 3.18
 -8 -21 -2 22.25 3.1
 -8 21 2 25.47 3.21
 -8 21 -2 25.5 3.12
 8 -21 -2 26.8 3.05
 8 21 2 31.74 3.51
 -9 21 2 -0.66 1.17
 -9 -21 -2 3.85 1.84
 9 -21 -2 -0.05 1.59
 0 22 2 0.25 1.19
 0 22 -2 -0.65 0.98
 0 22 -2 -1.32 0.85
 0 22 2 -0.08 1.09
 0 22 2 0.74 1.05
 0 22 -2 0.91 1.03
 0 -22 -2 -0.55 1.01
 1 22 -2 1.75 1.05
 -1 -22 -2 1.19 1.02
 1 22 -2 0.06 1.03
 -1 22 2 1.03 1.2
 -1 22 2 2.46 1.34
 1 22 -2 0.43 1.07
 -1 22 2 0.81 1.17
 1 22 2 -0.07 1.04
 1 22 2 -0.18 1.1
 -1 22 -2 2.94 1.28
 -1 22 -2 1.27 1.07
 1 22 2 0.9 1.15
 -1 22 -2 2.09 1.23
 1 -22 -2 1.29 1.2
 -2 -22 -2 0.72 1.08
 -2 22 2 -0.11 1.01
 -2 22 2 -2.02 0.99
 2 22 -2 0.89 0.86
 2 22 -2 -0.49 1.05
 -2 22 2 1.66 1.18
 2 22 -2 0.13 1.06
 2 22 2 1.04 1.16
 2 22 2 0.25 1.04
 -2 22 -2 -0.03 1.01
 -2 22 -2 0.23 0.91
 2 22 2 -0.18 1.03
 2 -22 -2 0.43 1.14
 -2 22 -2 0.72 1.18
 3 22 -2 15.1 2.39
 3 22 -2 7.3 1.74
 -3 22 2 9.68 1.97
 3 22 -2 10.87 2.2
 -3 22 2 10.08 2.18
 -3 -22 -2 13.89 2.39
 -3 22 -2 10.75 2.04
 3 22 2 10.48 2.17
 -3 22 -2 10.92 2.21
 3 22 2 12.72 2.34
 3 -22 -2 12.65 2.26
 3 22 2 7.95 1.92
 4 22 -2 0.69 1.17
 -4 -22 -2 2.89 1.3
 4 22 -2 0.97 1.16
 -4 22 2 1.63 1.37
 4 22 -2 1.02 1.27
 -4 22 2 1.98 1.38
 4 22 2 0.26 1.28
 4 -22 -2 0.48 1.18
 4 22 2 -0.06 1.15
 4 22 2 1.13 1.33
 -4 22 -2 1.41 1.23
 -4 22 -2 -0.31 1.13
 5 22 -2 21.79 2.79
 -5 22 2 21.91 2.72
 -5 -22 -2 23.6 2.65
 5 22 -2 18.52 2.47
 5 22 -2 21.63 2.84
 -5 22 -2 18.84 2.54
 5 22 2 23.85 2.97
 5 22 2 15.63 2.7
 5 -22 -2 18.54 2.52
 5 22 2 22.75 3.06
 6 22 -2 0.02 1.33
 -6 -22 -2 0.6 1.4
 6 22 -2 0.65 1.55
 6 22 -2 -0.27 1.17
 -6 22 2 -0.28 1.34
 6 22 2 0.08 1.31
 6 22 2 0.87 1.29
 6 22 2 -0.29 1.41
 -6 22 -2 -0.92 1.15
 6 -22 -2 0.52 1.32
 7 22 -2 19.91 3.02
 -7 -22 -2 20.34 2.78
 -7 22 2 20.73 3.17
 -7 22 -2 21.18 2.87
 7 22 2 29.47 3.66
 7 22 2 28.33 3.49
 7 -22 -2 21.22 2.88
 -8 22 2 -0.49 1.35
 8 22 2 1.57 1.46
 0 23 2 -1.21 1.12
 0 23 2 1.41 1.35
 0 23 -2 -0.59 1.18
 0 23 -2 0.16 1.27
 0 23 2 0.01 1.15
 0 23 -2 0.31 1.06
 0 -23 -2 1.01 1.04
 -1 23 2 0.92 1.38
 1 23 -2 0.9 1.29
 1 23 -2 2.11 1.28
 1 23 -2 0.16 1.17
 -1 -23 -2 -0.65 1
 -1 23 2 0.08 0.92
 -1 23 2 0.73 1.34
 1 23 2 3.51 1.64
 -1 23 -2 0.87 1.17
 1 -23 -2 1.84 1.26
 -1 23 -2 0.78 1.2
 1 23 2 1.65 1.54
 1 23 2 1.04 1.08
 -1 23 -2 2.41 1.41
 -2 -23 -2 13.25 2.37
 2 23 -2 16.67 2.75
 -2 23 2 14.22 2.46
 -2 23 2 13.68 2.61
 2 23 -2 15.46 2.54
 2 23 -2 11.76 2.27
 -2 23 2 15.68 2.59
 -2 23 -2 17.19 2.61
 2 23 2 15.36 2.58
 2 -23 -2 19.45 2.44
 -2 23 -2 18.66 2.48
 2 23 2 16.59 2.81
 -2 23 -2 15.65 2.65
 2 23 2 17.17 2.62
 -3 23 2 1.99 1.3
 3 23 -2 2.63 1.3
 3 23 -2 0.02 1.17
 3 23 -2 0.39 1.01
 -3 23 2 -0.69 1.33
 -3 -23 -2 2.42 1.42
 3 23 2 1.51 1.37
 3 23 2 0.58 1.32
 3 23 2 0.75 1.13
 -3 23 -2 -0.25 1.04
 3 -23 -2 2.71 1.39
 -3 23 -2 1.45 1.23
 -4 23 2 28.54 3.26
 -4 -23 -2 33.14 3.36
 4 23 -2 37.32 3.57
 4 23 -2 34.82 3.57
 -4 23 2 35.83 3.57
 4 23 -2 32.13 3.39
 -4 23 -2 32.02 3.46
 4 23 2 28.21 3.27
 4 23 2 36.6 3.78
 -4 23 -2 32.01 3.23
 4 23 2 34.03 3.34
 4 -23 -2 34.97 3.4
 5 23 -2 -1.03 1.41
 -5 23 2 0.46 1.23
 -5 -23 -2 1.19 1.31
 5 23 -2 0.95 1.37
 5 23 -2 0.75 1.46
 5 23 2 -0.28 1.58
 5 -23 -2 0.93 1.31
 -5 23 -2 -0.98 1.14
 5 23 2 0.05 1.47
 5 23 2 1.1 1.49
 -6 23 2 35.09 3.64
 6 23 -2 42.65 3.9
 6 23 2 33.52 3.64
 -6 23 -2 36.28 3.62
 0 24 -2 0 1.23
 0 24 -2 0.26 1.24
 0 24 -2 -0.04 1.23
 0 24 2 2.04 1.51
 0 24 2 0.74 1.45
 0 24 2 0.85 1.25
 1 24 -2 -0.74 1.26
 1 24 -2 0.54 1.43
 -1 24 2 0.56 1.38
 -1 24 2 2.58 1.38
 -1 24 2 1.16 1.57
 1 24 -2 0.29 1.21
 1 24 2 2.97 1.72
 1 24 2 1.38 1.52
 -1 24 -2 0.17 1.22
 -1 24 -2 0.97 1.5
 1 24 2 2.13 1.38
 -1 24 -2 -0.37 1.36
 -2 24 2 0.03 1.23
 2 24 -2 0.24 1.09
 -2 24 2 1.41 1.55
 2 24 -2 1.32 1.61
 -2 24 2 0.21 1.36
 2 24 -2 -1.24 1.18
 -2 24 -2 1.21 1.73
 2 24 2 -0.06 1.39
 2 24 2 1.24 1.57
 -2 24 -2 1.38 1.36
 -2 24 -2 1.92 1.56
 2 24 2 1.59 1.28
 3 24 -2 5.09 1.99
 3 24 -2 5.83 1.99
 -3 24 2 6.29 2.1
 -3 24 2 3.89 1.75
 -3 24 -2 6.06 1.91
 -3 24 -2 5.8 2.15
 3 24 2 5.38 1.97
 3 24 2 7.74 2.16
 3 24 2 6.42 2.03
 -4 24 2 0.5 1.55
 4 24 2 -0.9 1.54
 -4 24 -2 -1.98 1.17
 -5 24 2 22.8 2.96
 5 24 2 22.19 3.34
 0 25 2 2.15 1.61
 -1 25 2 2.51 1.71
 1 25 2 3.06 1.8
 -2 25 2 12.38 2.57
 0 0 -3 -0.05 0.08
 0 0 -3 0 0.09
 -1 0 -3 -0.09 0.12
 1 0 3 -0.18 0.12
 1 0 3 -0.05 0.14
 1 0 -3 -0.19 0.13
 1 0 3 0.19 0.15
 1 0 -3 -0.09 0.15
 1 0 -3 -0.23 0.1
 2 0 3 -0.11 0.19
 2 0 -3 -0.07 0.23
 2 0 3 0.18 0.22
 2 0 -3 0.01 0.24
 2 0 -3 0.3 0.22
 -2 0 -3 -0.07 0.23
 2 0 3 -0.17 0.2
 2 0 -3 0.17 0.2
 -2 0 3 0.06 0.21
 3 0 -3 0.21 0.31
 -3 0 3 0 0.28
 3 0 3 -0.12 0.3
 -3 0 -3 0.25 0.31
 3 0 3 -0.23 0.32
 3 0 -3 -0.09 0.3
 3 0 -3 -0.31 0.29
 3 0 -3 0.15 0.25
 3 0 3 -0.06 0.31
 4 0 3 -0.29 0.36
 4 0 -3 0.43 0.38
 4 0 -3 0.15 0.37
 -4 0 -3 -0.3 0.28
 4 0 3 -0.17 0.36
 4 0 -3 0.11 0.36
 -4 0 3 0.09 0.35
 4 0 3 0.36 0.51
 4 0 -3 0.13 0.29
 -5 0 3 -0.21 0.41
 5 0 3 -0.2 0.49
 5 0 3 0 0.4
 -5 0 -3 0.02 0.43
 5 0 3 -0.01 0.41
 5 0 -3 0.54 0.47
 5 0 -3 0.27 0.39
 5 0 -3 0 0.3
 6 0 -3 -0.49 0.52
 6 0 3 -0.07 0.45
 6 0 3 -0.12 0.49
 6 0 3 0.45 0.5
 6 0 -3 0.18 0.51
 -6 0 -3 0.39 0.51
 -6 0 3 -0.22 0.47
 6 0 -3 -0.16 0.49
 7 0 3 -0.31 0.62
 7 0 3 -0.44 0.56
 7 0 -3 -1.22 0.46
 -7 0 3 0.13 0.55
 -7 0 -3 -0.11 0.54
 7 0 -3 -0.16 0.65
 7 0 -3 0.17 0.57
 7 0 3 -0.23 0.52
 7 0 -3 -0.22 0.59
 8 0 3 0.53 0.78
 8 0 -3 -0.11 0.64
 8 0 -3 0.94 0.78
 8 0 -3 -0.84 0.58
 8 0 3 0.4 0.67
 -8 0 -3 -0.11 0.59
 8 0 -3 -0.39 0.73
 -8 0 3 -0.13 0.74
 8 0 3 -0.21 0.71
 9 0 -3 0.12 0.68
 -9 0 -3 0.19 0.7
 9 0 3 -0.75 0.76
 9 0 -3 -0.79 0.55
 9 0 -3 0.79 0.72
 9 0 3 -0.23 0.71
 9 0 -3 0.04 0.61
 -9 0 3 -0.5 0.71
 9 0 3 -0.47 0.57
 9 0 -3 -0.31 0.67
 10 0 -3 1.01 0.85
 10 0 3 -1.08 0.7
 10 0 -3 0.88 0.87
 10 0 -3 -0.97 0.67
 10 0 -3 -0.26 0.79
 -10 0 3 0.71 0.9
 10 0 3 1 0.86
 -10 0 -3 -0.16 0.69
 10 0 3 -0.77 0.72
 -11 0 -3 -0.94 0.68
 11 0 3 0.03 0.98
 11 0 -3 0.88 1
 11 0 -3 0.52 0.93
 11 0 -3 -0.68 0.88
 11 0 3 0.55 0.83
 11 0 3 0.24 0.96
 11 0 -3 -0.3 0.86
 12 0 3 -1.88 0.82
 12 0 3 0.71 0.98
 -12 0 -3 0.7 1.06
 12 0 -3 -0.2 1.05
 12 0 -3 -0.59 0.95
 12 0 3 -0.43 1.08
 12 0 -3 -1.09 0.81
 13 0 -3 0.29 1.24
 13 0 3 -1.21 0.97
 13 0 -3 -0.41 1.08
 13 0 -3 -0.43 1.25
 13 0 3 1.02 1.16
 -13 0 -3 -1.03 0.95
 14 0 -3 -0.73 1.41
 14 0 3 0.5 1.3
 14 0 3 -0.49 1.22
 14 0 -3 1.08 1.29
 14 0 -3 -1.7 1.13
 15 0 3 0.8 1.79
 15 0 -3 0.88 1.58
 15 0 -3 -0.73 1.64
 15 0 3 0.12 1.55
 15 0 -3 1.4 1.64
 0 1 3 -0.22 0.11
 0 -1 -3 -0.12 0.13
 0 1 3 -0.05 0.11
 0 -1 -3 -0.14 0.12
 1 -1 3 116.61 4.63
 1 1 -3 116.46 4.53
 1 1 -3 114.44 4.61
 1 1 -3 114.72 4.63
 1 1 -3 114.9 4.62
 1 -1 3 116.33 4.64
 -1 1 3 121.82 4.68
 -1 -1 -3 125 4.71
 1 -1 3 117.97 4.67
 1 1 3 119.87 4.73
 1 1 3 122.72 4.77
 1 -1 -3 121 4.71
 -1 1 -3 114.51 4.61
 1 -1 -3 114.83 4.69
 1 1 3 116.32 4.66
 2 -1 3 45.05 2.13
 -2 1 3 42.77 2.08
 2 -1 3 46.55 2.14
 2 1 -3 44.02 2.1
 2 -1 3 46.39 2.09
 2 1 -3 47.68 2.09
 2 1 -3 47.69 2.13
 2 -1 3 50.27 2.12
 2 -1 3 46.68 2.09
 -2 -1 -3 49.82 2.17
 -2 -1 3 45.01 2.07
 2 -1 -3 41.51 2.1
 -2 1 -3 47.13 2.1
 2 1 3 46.27 2.21
 2 -1 -3 47.32 2.15
 2 -1 -3 45.37 2.13
 2 -1 -3 46.56 2.1
 2 1 3 48.37 2.2
 2 1 3 48.08 2.17
 3 -1 3 140.48 5.65
 3 1 -3 128.13 5.61
 3 -1 3 137.96 5.74
 -3 1 3 140.13 5.64
 3 -1 3 127.41 5.58
 -3 -1 -3 135.66 5.66
 3 1 -3 129.94 5.54
 3 1 -3 134.77 5.65
 3 -1 3 138.08 5.63
 3 -1 -3 139.73 5.58
 -3 1 -3 140.14 5.62
 3 1 3 138.76 5.67
 3 -1 -3 133.37 5.65
 3 -1 -3 135.27 5.65
 3 1 3 144.31 5.78
 -3 -1 3 131.98 5.59
 3 1 3 131.88 5.76
 3 -1 -3 125.31 5.64
 4 -1 3 61.08 3.08
 4 -1 3 59.22 3.01
 -4 1 3 59.52 2.97
 4 -1 3 66.19 3.07
 4 1 -3 60.61 3.04
 4 -1 3 57.34 2.98
 -4 -1 -3 56.42 2.98
 4 1 -3 60.32 3.02
 4 -1 3 59.33 3.07
 -4 -1 3 66.38 3.04
 -4 1 -3 67.91 3.05
 4 -1 -3 65.11 3.08
 4 1 3 63.7 3.07
 4 -1 -3 60.08 3.02
 4 1 3 66 3.16
 4 -1 -3 67.51 3.05
 4 1 3 62.5 3.13
 5 -1 3 48.69 2.64
 5 1 -3 48.55 2.65
 5 1 -3 50.6 2.73
 5 -1 3 53.01 2.77
 -5 -1 -3 49.55 2.68
 5 -1 3 47.89 2.72
 -5 1 3 47.62 2.61
 5 -1 3 43.35 2.58
 5 -1 3 48.53 2.67
 5 -1 -3 49.35 2.7
 5 -1 -3 46.65 2.61
 -5 1 -3 45.65 2.6
 5 1 3 50.31 2.8
 -5 -1 3 48.1 2.61
 5 1 3 49.45 2.69
 5 1 3 45.69 2.73
 5 -1 -3 51.24 2.75
 5 -1 -3 51.59 2.7
 6 -1 3 129.16 6.09
 6 -1 3 132.66 5.98
 6 1 -3 134.28 5.96
 6 1 -3 134.69 6.05
 6 1 -3 127.27 6.12
 6 1 -3 120.93 5.99
 -6 -1 -3 138.26 6.04
 -6 1 3 136.34 5.98
 6 -1 3 121.33 5.9
 6 -1 3 129.07 6.08
 -6 1 -3 126.09 5.94
 6 -1 -3 137.09 6.05
 -6 -1 3 135.15 5.95
 6 -1 -3 126.8 6
 6 1 3 124.87 6.14
 6 1 3 137.66 6.19
 6 -1 -3 134.61 5.95
 6 1 3 130.24 5.99
 7 1 -3 1.77 0.85
 7 1 -3 3.27 0.96
 7 -1 3 3.26 0.9
 -7 1 3 2.35 0.77
 -7 -1 -3 2.81 0.83
 7 1 -3 1.6 0.78
 7 -1 3 0.88 0.71
 7 1 -3 2.33 0.82
 7 -1 3 2.15 0.85
 7 1 -3 0.73 0.7
 7 -1 3 3.07 0.86
 7 1 3 1.25 0.78
 7 1 3 1.73 0.81
 7 -1 -3 1.67 0.76
 7 -1 -3 2.78 0.88
 7 -1 -3 2.29 0.82
 7 1 3 2.47 0.87
 -7 -1 3 2.34 0.79
 -7 1 -3 2.55 0.8
 8 1 -3 223.05 9.93
 8 1 -3 216.22 9.92
 8 -1 3 219.18 9.82
 -8 -1 -3 224.29 9.88
 -8 1 3 234.89 9.89
 8 -1 3 227.09 10.06
 8 1 -3 210.72 10.02
 8 -1 3 225.55 10.05
 8 1 -3 234.83 10.17
 8 1 -3 226.71 9.78
 8 -1 3 234.96 9.93
 -8 -1 3 215.67 9.74
 -8 1 -3 222.73 9.86
 8 -1 -3 219.82 9.86
 8 1 3 221.42 10.12
 8 1 3 223.68 10.1
 8 -1 -3 226.01 9.8
 8 -1 -3 210.74 9.86
 8 1 3 218.49 9.85
 9 1 -3 23.29 2.22
 9 1 -3 26.34 2.26
 9 1 -3 24.73 2.28
 9 -1 3 25.73 2.42
 9 -1 3 29.02 2.36
 -9 -1 -3 24.66 2.22
 9 -1 3 24.67 2.31
 -9 1 3 21.6 2.06
 9 1 -3 20.5 2.18
 9 -1 -3 21.69 2.18
 9 1 3 24.91 2.33
 9 -1 -3 24.55 2.28
 9 -1 -3 22.34 2.3
 9 1 3 21.11 2.21
 9 -1 -3 26.44 2.3
 -9 -1 3 23.37 2.24
 9 -1 -3 22.16 2.09
 -9 1 -3 22.77 2.15
 9 1 3 20.83 2.22
 10 -1 3 20.04 2.31
 -10 1 3 26.49 2.44
 10 1 -3 22.44 2.33
 10 1 -3 26.16 2.56
 10 1 -3 23.92 2.38
 -10 -1 -3 24.75 2.27
 10 1 -3 24.08 2.41
 10 -1 3 24.69 2.41
 10 -1 3 22.95 2.28
 10 -1 -3 26.81 2.36
 10 1 3 26.03 2.44
 -10 -1 3 25.34 2.45
 10 1 3 27.07 2.55
 -10 1 -3 18.96 2.14
 10 -1 -3 22.6 2.22
 10 -1 -3 24.82 2.35
 10 1 3 18.39 2.27
 10 -1 -3 24.39 2.44
 11 1 -3 10.63 2
 11 -1 3 10.85 1.87
 -11 -1 -3 12.91 2.05
 11 -1 3 12.64 2.08
 11 1 -3 11.85 2.11
 11 1 -3 8.07 1.76
 11 -1 3 17.13 2.14
 11 1 3 12.98 2.07
 11 1 3 10.66 1.97
 11 1 3 9.84 1.83
 11 -1 -3 10.81 1.9
 11 -1 -3 11.8 2.08
 11 -1 -3 11.22 1.91
 -11 1 -3 10.4 1.86
 11 -1 -3 14.65 1.95
 12 1 -3 0.19 0.97
 12 -1 3 -0.2 1.1
 12 1 -3 0.22 1.06
 -12 -1 -3 -0.84 0.88
 12 -1 3 0.11 1.02
 12 1 -3 -0.09 0.9
 12 -1 3 -0.49 0.9
 12 1 3 1.52 1.28
 12 1 3 0.89 1.2
 12 -1 -3 0.14 1.02
 12 -1 -3 -0.31 1.04
 -12 1 -3 -0.22 0.93
 12 -1 -3 0.05 0.91
 12 -1 -3 -0.56 0.97
 12 1 3 0.2 1.02
 13 1 -3 30.19 3.37
 13 1 -3 38.83 3.5
 13 -1 3 43.45 3.61
 13 -1 3 34.71 3.45
 13 1 -3 37.87 3.66
 13 -1 -3 34.1 3.57
 13 -1 -3 33.22 3.43
 13 1 3 34.96 3.47
 13 -1 -3 30.63 3.34
 -13 1 -3 41.05 3.5
 13 1 3 31.52 3.39
 14 1 -3 2.51 1.59
 14 -1 3 4.72 1.82
 14 -1 3 2.28 1.54
 14 1 -3 3.75 1.55
 14 1 -3 2.85 1.63
 14 -1 -3 4.67 1.8
 14 -1 -3 1.05 1.68
 14 1 3 5.34 1.77
 14 1 3 4.58 1.95
 14 -1 -3 4.52 1.87
 15 1 -3 19.15 3.24
 15 -1 3 21.02 3.45
 15 1 -3 21.38 3.4
 15 1 -3 28 3.5
 15 -1 -3 19.11 3.43
 15 1 3 20.77 3.39
 15 -1 -3 22.19 3.36
 15 -1 -3 27.25 3.47
 15 1 3 22.09 3.46
 0 2 -3 95.82 3.83
 0 2 -3 102.96 3.9
 0 -2 -3 95.42 4.02
 0 2 -3 100.86 3.92
 0 -2 -3 106.12 4.04
 0 2 3 100.72 4.04
 0 2 -3 93.87 3.87
 0 2 3 98.43 3.99
 0 2 3 102.11 4.02
 0 -2 3 96.25 3.87
 1 2 -3 0.61 0.19
 -1 -2 -3 0.53 0.25
 1 -2 3 0.44 0.19
 1 2 -3 0.25 0.19
 1 2 -3 0.13 0.19
 1 2 -3 0.73 0.19
 -1 2 3 0.55 0.23
 -1 2 -3 0.41 0.17
 1 -2 -3 0.85 0.27
 1 2 3 0.52 0.26
 1 2 3 0.43 0.25
 1 2 3 0.5 0.26
 -1 2 -3 0.47 0.17
 1 -2 -3 0.42 0.21
 2 -2 3 94.68 3.75
 2 -2 3 89.96 3.75
 2 2 -3 88.47 3.76
 2 2 -3 89.04 3.81
 2 2 -3 86.41 3.69
 -2 -2 -3 89.45 3.83
 2 2 -3 87.99 3.76
 2 -2 3 87.69 3.67
 -2 2 3 87.28 3.78
 2 2 -3 83.16 3.8
 2 -2 3 92.8 3.74
 -2 2 -3 91.73 3.75
 2 2 3 96.68 3.85
 2 2 3 92.31 3.91
 2 2 3 86.48 3.89
 2 -2 -3 80.93 3.78
 2 -2 -3 90.78 3.8
 -2 -2 3 86.71 3.73
 2 -2 -3 98.35 3.85
 3 2 -3 54.8 2.78
 3 2 -3 55.75 2.78
 -3 -2 -3 63.94 2.82
 3 2 -3 55.3 2.73
 3 -2 3 51.31 2.63
 3 -2 3 58.13 2.72
 3 -2 3 62.27 2.75
 3 2 -3 58.3 2.72
 -3 2 3 54.77 2.71
 3 2 -3 61.97 2.79
 3 2 3 62.21 2.84
 -3 -2 3 58.96 2.71
 3 -2 -3 59.27 2.78
 3 -2 -3 56.58 2.72
 3 2 3 58.73 2.85
 3 -2 -3 62.48 2.81
 3 -2 -3 58.3 2.77
 3 2 3 54.42 2.85
 -3 2 -3 58.58 2.7
 4 2 -3 7.67 0.87
 4 2 -3 6.45 0.84
 4 -2 3 7.34 0.87
 -4 2 3 7.66 0.84
 4 2 -3 5.43 0.82
 4 2 -3 6.58 0.87
 4 -2 3 7.52 0.92
 -4 -2 -3 6.92 0.9
 4 2 -3 6.01 0.91
 4 -2 3 6.61 0.89
 4 -2 -3 6 0.87
 4 -2 -3 7.08 0.85
 -4 -2 3 7.4 0.83
 4 -2 -3 6.67 0.87
 4 2 3 4.91 0.81
 4 -2 -3 6.88 0.82
 4 2 3 6.31 0.93
 -4 2 -3 6.31 0.8
 4 2 3 4.78 0.87
 -5 2 3 5.34 0.86
 -5 -2 -3 4.87 0.86
 5 2 -3 5.54 0.96
 5 2 -3 5.5 0.94
 5 -2 3 5.82 0.93
 5 -2 3 5.24 0.89
 5 -2 3 4.85 0.86
 5 2 -3 5.9 0.95
 5 2 -3 6.2 0.93
 5 2 -3 6.09 1.01
 5 -2 3 4.32 0.81
 5 -2 -3 3.71 0.78
 5 2 3 4.14 0.87
 5 2 3 5.27 0.97
 5 -2 -3 4.68 0.85
 5 -2 -3 5.96 0.91
 5 2 3 4.97 0.89
 -5 2 -3 4.5 0.78
 -5 -2 3 5.1 0.84
 5 -2 -3 4.23 0.83
 6 -2 3 11.3 1.22
 6 2 -3 11.03 1.33
 6 -2 3 14.29 1.4
 6 -2 3 10.12 1.22
 -6 2 3 9.56 1.13
 6 -2 3 9.42 1.2
 -6 -2 -3 11.6 1.3
 6 2 -3 11.52 1.34
 6 2 -3 13.56 1.43
 6 2 -3 10.58 1.27
 6 -2 -3 12.75 1.3
 6 2 3 11.08 1.39
 6 -2 -3 11.38 1.32
 -6 -2 3 11.23 1.22
 6 -2 -3 8.65 1.17
 -6 2 -3 11.24 1.18
 6 2 3 8.96 1.22
 6 2 3 11.41 1.43
 6 -2 -3 10.5 1.27
 -7 2 3 6.36 1.11
 7 -2 3 3.94 0.99
 7 -2 3 5.23 1.07
 7 2 -3 6.8 1.19
 7 2 -3 8.39 1.32
 7 2 -3 5.01 1.09
 7 2 -3 5.07 1.09
 7 -2 3 4.88 1.13
 -7 -2 -3 4.3 1
 7 -2 3 6.08 1.18
 7 -2 -3 5.75 1.09
 7 2 3 5.2 1.18
 7 2 3 5.13 1.07
 7 -2 -3 5.35 1.06
 7 -2 -3 6.16 1.15
 -7 -2 3 6.1 1.05
 -7 2 -3 4.53 0.98
 7 2 3 4.36 1.07
 8 -2 3 2.84 1.02
 -8 -2 -3 2.54 0.89
 8 2 -3 1.66 0.92
 -8 2 3 1.82 0.81
 8 -2 3 1.86 0.91
 8 -2 3 0.63 0.73
 8 2 -3 0.84 0.8
 8 2 -3 1.1 0.87
 8 2 -3 3.24 0.94
 8 -2 3 1.54 0.88
 8 -2 -3 1.92 0.93
 8 -2 -3 2.27 0.9
 8 2 3 3.4 1.09
 8 2 3 2.71 1.03
 -8 2 -3 2.1 0.85
 -8 -2 3 3.03 0.91
 8 2 3 1.47 0.85
 8 -2 -3 2.14 0.94
 9 2 -3 3.17 1.07
 -9 2 3 3.04 1.01
 9 2 -3 3.04 1.03
 9 -2 3 1.59 0.97
 9 -2 3 2.03 1.05
 9 -2 3 1.21 0.81
 -9 -2 -3 2.07 0.95
 9 2 -3 2.71 0.97
 9 -2 3 2.52 1.02
 9 2 3 2.98 1.02
 -9 2 -3 2.75 0.87
 9 -2 -3 1.67 0.88
 9 -2 -3 2.92 1.18
 9 2 3 1.95 0.94
 -9 -2 3 3.4 1.08
 9 2 3 1.58 0.95
 9 -2 -3 2.63 0.95
 10 2 -3 2.82 1.18
 10 2 -3 3.81 1.18
 10 -2 3 4.23 1.16
 10 2 -3 3.56 1.22
 -10 2 3 2.74 1.1
 10 -2 3 0.69 0.86
 10 -2 3 1.5 0.99
 -10 -2 -3 3.85 1.14
 10 -2 -3 4.32 1.19
 -10 2 -3 4.72 1.25
 10 2 3 4.33 1.23
 10 -2 -3 1.13 0.89
 10 -2 -3 4.31 1.26
 10 2 3 2.54 1.08
 10 2 3 2.98 1.08
 10 -2 -3 2.35 1.17
 11 2 -3 0.03 0.87
 11 2 -3 -0.39 0.97
 -11 -2 -3 0.13 0.74
 11 -2 3 -0.6 0.95
 11 -2 3 1.72 1.04
 11 -2 3 0.8 0.92
 11 2 -3 2.18 1.12
 11 2 3 3.1 1.34
 11 -2 -3 0.65 0.98
 -11 2 -3 0.66 0.83
 11 -2 -3 0.28 0.84
 11 -2 -3 0.54 0.89
 11 2 3 0.02 0.81
 11 2 3 0.74 0.98
 11 -2 -3 2.94 1.14
 12 2 -3 -1.89 0.86
 12 -2 3 1 1.04
 12 -2 3 -0.23 0.98
 -12 -2 -3 -0.3 0.9
 12 2 -3 0.38 1.03
 12 2 -3 0 1.11
 12 2 3 1.21 1.16
 12 2 3 -0.51 0.98
 -12 2 -3 -0.41 0.83
 12 2 3 0.73 1.07
 12 -2 -3 -0.25 0.92
 12 -2 -3 -1.41 0.96
 12 -2 -3 0.4 1.1
 12 -2 -3 -0.45 0.93
 13 -2 3 0.54 1.24
 13 2 -3 -0.85 1.13
 13 -2 3 0.93 1.16
 13 2 -3 -0.21 1.19
 13 2 -3 0.51 1.21
 -13 2 -3 -1.04 1
 13 2 3 -1.07 1.05
 13 -2 -3 -0.43 1.13
 13 -2 -3 -1.87 1.09
 13 -2 -3 -0.15 1.1
 13 2 3 -1.24 1.07
 13 -2 -3 0.59 1.09
 14 2 -3 -0.18 1.28
 14 2 -3 1.17 1.43
 14 2 -3 0.63 1.47
 14 -2 3 1 1.65
 14 -2 3 2.25 1.31
 14 2 3 -1.69 1.18
 14 -2 -3 2.1 1.46
 14 -2 -3 -1.19 1.24
 14 -2 -3 -1.46 1.3
 14 2 3 1.28 1.49
 15 2 -3 -1.65 1.44
 15 2 -3 -1.87 1.32
 15 -2 3 -0.37 1.61
 15 2 -3 -2.48 1.41
 15 -2 -3 1.91 1.5
 15 2 3 0.26 1.8
 15 2 3 1.27 1.6
 15 -2 -3 1.02 1.85
 0 3 -3 -0.1 0.15
 0 -3 -3 -0.14 0.2
 0 3 3 0.01 0.2
 0 3 -3 0.1 0.17
 0 3 3 0.05 0.19
 0 -3 3 0.14 0.15
 0 -3 -3 0.03 0.24
 0 3 3 0.27 0.23
 0 3 -3 -0.08 0.15
 -1 3 3 297.94 11.8
 1 3 -3 310.29 11.85
 1 3 -3 298.01 11.62
 1 3 -3 294.59 11.76
 1 -3 3 306.34 11.7
 -1 3 3 313.9 11.87
 -1 3 3 305.84 11.72
 1 -3 3 297.58 11.64
 1 3 3 309.85 11.91
 -1 3 -3 303.15 11.69
 1 -3 -3 283.63 11.8
 -1 3 -3 292.71 11.58
 -1 3 -3 304.17 11.73
 1 3 3 306.2 11.74
 1 3 3 307.19 11.96
 -2 -3 -3 178.77 6.86
 2 -3 3 173.2 6.6
 2 3 -3 162.53 6.71
 2 -3 3 158.36 6.68
 -2 3 3 179.57 6.84
 2 3 -3 172.04 6.86
 2 3 -3 156.64 6.78
 2 -3 3 164.03 6.72
 2 -3 3 171.11 6.71
 -2 -3 3 171.57 6.74
 -2 3 -3 160.71 6.7
 2 -3 -3 169.53 6.84
 2 3 3 165.9 6.95
 2 3 3 158.29 6.79
 2 -3 -3 166.09 6.81
 2 3 3 168.31 6.92
 3 -3 3 105.04 4.52
 3 -3 3 110.52 4.54
 3 -3 3 111.73 4.54
 3 3 -3 108.71 4.64
 -3 3 3 101.36 4.53
 3 3 -3 105.13 4.62
 -3 -3 -3 99.5 4.57
 3 -3 3 105.46 4.43
 3 3 -3 104.45 4.55
 3 3 3 103.25 4.59
 3 -3 -3 107.44 4.61
 3 3 3 96.17 4.64
 3 -3 -3 104.87 4.5
 3 3 3 102.39 4.7
 3 -3 -3 110.94 4.61
 -3 -3 3 104.74 4.5
 3 -3 -3 105.92 4.59
 -3 3 -3 97.97 4.47
 4 3 -3 228.38 9.24
 -4 3 3 230.3 9.25
 4 -3 3 218.61 9.16
 4 3 -3 206.98 9.35
 4 3 -3 229.82 9.37
 4 -3 3 222.66 9.04
 4 -3 3 226.96 9.21
 -4 -3 -3 236.82 9.32
 4 -3 3 220.93 9.19
 4 3 3 225 9.45
 4 3 3 225.39 9.42
 4 -3 -3 220.17 9.09
 4 -3 -3 237.82 9.3
 4 -3 -3 218.24 9.25
 4 -3 -3 224.12 9.26
 -4 3 -3 219.39 9.2
 4 3 3 225.13 9.28
 -4 -3 3 224.88 9.19
 -5 3 3 9.78 1.06
 5 -3 3 9.72 1.08
 5 -3 3 10.81 1.11
 5 -3 3 11.15 1.2
 -5 -3 -3 11.19 1.15
 5 3 -3 11.62 1.29
 5 3 -3 10.52 1.23
 5 3 -3 12.49 1.28
 5 3 3 11.3 1.25
 -5 -3 3 10.32 1.16
 5 -3 -3 9.96 1.08
 -5 3 -3 12.17 1.13
 5 3 3 11.1 1.2
 5 -3 -3 12.33 1.19
 5 -3 -3 9.27 1.17
 5 -3 -3 10.47 1.17
 5 3 3 10.71 1.24
 6 3 -3 197.97 8.42
 6 -3 3 191.36 8.12
 6 -3 3 186.03 8.11
 6 3 -3 184.64 8.17
 6 3 -3 203.58 8.44
 -6 3 3 183.17 8.1
 -6 -3 -3 194.95 8.21
 6 -3 3 182.1 7.95
 -6 -3 3 183.28 8.07
 -6 3 -3 176.58 8.05
 6 3 3 183.01 8.19
 6 -3 -3 172.49 8.1
 6 -3 -3 185.45 8.18
 6 3 3 187.42 8.4
 6 3 3 196.44 8.41
 6 -3 -3 181.34 8.13
 6 -3 -3 188.22 8.06
 7 -3 3 1.99 0.73
 7 3 -3 1.69 0.8
 7 3 -3 2.01 0.82
 7 -3 3 1.04 0.74
 -7 3 3 1 0.59
 -7 -3 -3 0 0.57
 7 -3 3 0.58 0.63
 7 3 -3 0.37 0.69
 7 -3 3 0.83 0.66
 -7 3 -3 1.43 0.69
 7 -3 -3 1.55 0.78
 7 -3 -3 1.68 0.75
 7 3 3 1.2 0.76
 -7 -3 3 1.42 0.75
 7 3 3 1.89 0.83
 7 -3 -3 3.15 0.9
 7 -3 -3 1.88 0.83
 7 3 3 1.89 0.79
 8 3 -3 216.05 9.72
 8 -3 3 194.79 9.18
 8 3 -3 207.52 9.72
 -8 3 3 210.26 9.41
 8 -3 3 215.87 9.66
 -8 -3 -3 206.57 9.44
 8 -3 3 221.18 9.48
 8 -3 3 201.24 9.32
 8 3 -3 210.71 9.54
 8 -3 3 220.46 9.48
 8 3 3 213.44 9.75
 -8 -3 3 212.88 9.4
 8 -3 -3 225.29 9.58
 -8 3 -3 209.03 9.43
 8 -3 -3 212.74 9.51
 8 3 3 224.66 9.79
 8 3 3 209.22 9.51
 8 -3 -3 201.02 9.28
 9 3 -3 10.81 1.78
 9 3 -3 11.7 1.82
 -9 -3 -3 11.83 1.75
 9 -3 3 11.98 1.76
 9 -3 3 9.09 1.53
 9 -3 3 9.66 1.65
 9 -3 3 12.37 1.87
 -9 3 3 12.11 1.76
 9 3 -3 11.08 1.82
 9 -3 3 10.12 1.77
 9 3 3 9.18 1.63
 -9 3 -3 10.5 1.65
 9 -3 -3 10.72 1.69
 9 -3 -3 11.39 1.55
 9 -3 -3 10.97 1.65
 9 3 3 10.17 1.72
 -9 -3 3 11.31 1.7
 9 3 3 10.35 1.66
 -10 3 3 80.97 4.65
 10 3 -3 86.03 5.05
 10 -3 3 79.18 4.73
 10 3 -3 75.65 4.86
 10 -3 3 72.88 4.6
 10 -3 3 75.56 4.59
 -10 -3 -3 81.97 4.68
 10 3 -3 70.79 4.59
 10 -3 3 87.62 4.81
 10 -3 -3 73.99 4.62
 10 -3 -3 77.42 4.66
 10 3 3 72.82 4.75
 10 3 3 80.09 4.9
 -10 3 -3 79 4.62
 10 -3 -3 76.57 4.61
 10 3 3 83.22 4.82
 11 -3 3 9.25 1.8
 11 -3 3 9.41 1.83
 11 -3 3 10.48 1.88
 11 3 -3 13.7 2.23
 -11 3 3 10.65 1.79
 11 3 -3 8.65 1.69
 11 -3 3 8.2 1.75
 11 3 -3 6.95 1.63
 -11 -3 -3 10.96 1.82
 11 -3 -3 8.63 1.81
 11 -3 -3 10.45 1.86
 11 3 3 12.88 2.07
 -11 3 -3 9.06 1.67
 11 -3 -3 10.41 1.9
 11 3 3 9.1 1.88
 11 -3 -3 10.64 1.97
 11 3 3 8.96 1.88
 11 -3 -3 12.23 1.9
 12 3 -3 1.38 1.19
 12 3 -3 2.47 1.38
 12 -3 3 3.23 1.39
 12 -3 3 3.56 1.32
 12 3 -3 3.01 1.37
 -12 -3 -3 2.58 1.28
 12 3 3 2.43 1.37
 12 -3 -3 2.73 1.36
 12 -3 -3 2.5 1.37
 12 -3 -3 1.58 1.27
 12 -3 -3 0.95 1.13
 12 3 3 4.13 1.4
 12 3 3 2.46 1.32
 -12 3 -3 2.43 1.1
 12 -3 -3 3.45 1.39
 13 -3 3 27.82 3.21
 13 3 -3 34.45 3.38
 13 -3 3 32.84 3.29
 13 3 -3 31.74 3.38
 13 3 -3 30.38 3.39
 13 -3 -3 35.59 3.28
 -13 3 -3 38.83 3.4
 13 -3 -3 33.23 3.44
 13 -3 -3 39.87 3.53
 13 -3 -3 38.92 3.56
 13 3 3 32.79 3.37
 13 3 3 32.82 3.45
 13 3 3 35.51 3.47
 14 3 -3 0.76 1.39
 14 -3 3 1.29 1.47
 14 3 -3 1.23 1.46
 14 3 -3 -0.53 1.31
 14 -3 -3 1.77 1.51
 14 3 3 3.38 1.74
 14 -3 -3 -1.3 1.21
 14 -3 -3 1.27 1.61
 14 -3 -3 2.3 1.55
 14 3 3 3.1 1.81
 15 3 -3 16.03 2.98
 15 3 -3 10.11 2.76
 15 3 -3 14.35 2.97
 15 -3 -3 11.64 2.83
 15 3 3 15.27 3.05
 15 3 3 11.56 2.74
 15 -3 -3 10.23 2.59
 0 4 3 4.02 0.55
 0 -4 -3 3.15 0.51
 0 -4 3 3.53 0.44
 0 4 3 3.34 0.52
 0 4 -3 3.04 0.42
 0 4 -3 3.27 0.46
 0 4 -3 3.42 0.45
 0 4 3 2.91 0.52
 0 -4 -3 3.06 0.52
 -1 4 3 9.26 0.8
 1 -4 3 10.49 0.71
 1 4 -3 10.23 0.75
 -1 4 3 9.33 0.82
 1 4 -3 8.84 0.7
 -1 -4 -3 8.04 0.82
 1 4 -3 7.52 0.7
 -1 4 3 9.69 0.79
 1 -4 3 9.18 0.66
 1 -4 -3 8.96 0.81
 -1 4 -3 9.38 0.69
 1 4 3 8.54 0.81
 1 -4 -3 8.4 0.82
 -1 4 -3 9.01 0.67
 1 4 3 8.23 0.81
 1 4 3 8.59 0.82
 -1 4 -3 8.02 0.67
 2 -4 3 40.07 1.88
 2 -4 3 40.47 1.93
 2 -4 3 39.59 1.93
 2 4 -3 40.03 2.02
 -2 -4 -3 40.19 2.08
 2 -4 3 39.83 1.94
 -2 4 3 41.28 2.04
 2 4 -3 37.58 2.03
 2 4 -3 37.84 1.97
 -2 4 -3 37.15 1.9
 2 -4 -3 35.83 2
 2 4 3 42.36 2.15
 -2 -4 3 38.75 1.91
 2 4 3 41.75 2.14
 2 -4 -3 39.14 2.03
 2 4 3 37.89 2.05
 3 -4 3 0.65 0.34
 3 4 -3 0.69 0.39
 3 4 -3 0.29 0.32
 -3 4 3 0.95 0.43
 3 -4 3 1.17 0.42
 -3 -4 -3 0.41 0.4
 3 -4 3 1.01 0.35
 3 4 -3 0.67 0.35
 3 -4 3 1.59 0.47
 3 4 3 0.08 0.39
 3 -4 -3 0.84 0.45
 3 -4 -3 0.23 0.34
 3 4 3 0.76 0.46
 -3 -4 3 0.46 0.3
 -3 4 -3 1.32 0.42
 3 4 3 0.54 0.44
 3 -4 -3 0.16 0.34
 3 -4 -3 0.11 0.33
 4 -4 3 26.25 1.75
 4 4 -3 29.9 1.85
 -4 4 3 26.83 1.76
 4 -4 3 30.17 1.8
 4 -4 3 26.97 1.72
 4 4 -3 28.85 1.81
 4 -4 3 25.08 1.73
 -4 -4 -3 26.43 1.77
 4 4 -3 27.28 1.82
 4 -4 -3 31.02 1.82
 4 4 3 28.14 1.95
 4 -4 -3 27 1.76
 -4 4 -3 27.34 1.71
 4 4 3 31.57 1.95
 4 -4 -3 29.48 1.86
 4 4 3 30.56 1.95
 4 -4 -3 27.84 1.81
 -4 -4 3 28.71 1.75
 5 -4 3 4.82 0.84
 5 4 -3 5.66 0.93
 -5 4 3 4.76 0.83
 5 -4 3 6.28 0.95
 5 4 -3 6.4 1.02
 5 4 -3 5.4 1.03
 -5 -4 -3 4.4 0.83
 5 -4 3 5.02 0.84
 5 -4 3 3.97 0.85
 5 -4 -3 6.26 0.98
 -5 -4 3 5.67 0.94
 5 -4 -3 4.19 0.86
 5 -4 -3 3.53 0.73
 5 4 3 5.79 0.99
 -5 4 -3 4.48 0.86
 5 4 3 4.13 0.96
 5 4 3 4.64 0.98
 5 -4 -3 5.64 0.9
 -6 4 3 28.94 1.99
 6 4 -3 27.2 2.1
 6 4 -3 26.64 2.04
 6 4 -3 30.43 2.19
 6 -4 3 26.7 1.94
 6 -4 3 25.98 1.89
 6 -4 3 25.99 1.96
 -6 -4 -3 30.42 2.08
 6 4 3 29.25 2.18
 6 -4 -3 30.07 2.09
 -6 4 -3 29.42 2.02
 6 -4 -3 28.22 2.04
 6 4 3 23.79 2.14
 -6 -4 3 29.72 2.05
 6 -4 -3 26.45 1.95
 6 -4 -3 26.56 2.02
 6 4 3 22.93 1.97
 7 -4 3 7.47 1.25
 7 -4 3 11.58 1.42
 7 4 -3 10.02 1.61
 -7 4 3 9.22 1.37
 7 4 -3 11.42 1.45
 7 4 -3 8.1 1.38
 -7 -4 -3 10.5 1.35
 7 -4 3 14.44 1.52
 7 -4 -3 10.88 1.4
 7 -4 -3 10.06 1.45
 -7 -4 3 10.57 1.32
 7 4 3 8.4 1.47
 -7 4 -3 9.69 1.29
 7 -4 -3 10.12 1.47
 7 4 3 7.39 1.37
 7 -4 -3 11.86 1.47
 7 4 3 9 1.48
 -8 -4 -3 1.95 0.92
 8 -4 3 0.5 0.83
 8 -4 3 1.23 0.83
 8 4 -3 0.73 0.72
 8 -4 3 1.83 0.92
 -8 4 3 1.94 0.83
 8 4 -3 1.79 0.83
 8 4 -3 1.33 0.79
 8 -4 3 0.76 0.75
 8 -4 -3 1.29 0.89
 8 4 3 1.45 0.92
 8 -4 -3 0.9 0.78
 8 4 3 -0.43 0.81
 8 -4 -3 2.03 0.79
 8 -4 -3 0.35 0.77
 -8 -4 3 1.88 0.83
 8 4 3 2.99 1.11
 -8 4 -3 1.69 0.83
 9 -4 3 9.27 1.58
 9 4 -3 7.26 1.48
 -9 4 3 9.14 1.55
 9 -4 3 7.64 1.37
 9 -4 3 11.07 1.68
 9 4 -3 12.41 1.89
 -9 -4 -3 10.36 1.63
 9 4 -3 11.9 1.85
 9 -4 -3 10.29 1.63
 9 4 3 8.75 1.63
 9 -4 -3 8.97 1.57
 9 -4 -3 7.67 1.47
 9 4 3 8.16 1.62
 -9 4 -3 11.54 1.67
 9 4 3 9.38 1.58
 -10 -4 -3 1.91 0.99
 10 -4 3 0.65 0.81
 10 -4 3 2.06 1.13
 10 4 -3 2.29 1.04
 10 -4 3 2.17 1
 10 4 -3 -0.51 0.8
 10 -4 3 1.77 1.05
 10 -4 3 3.58 1.21
 10 4 -3 1.18 0.95
 -10 4 3 1.63 0.98
 10 -4 -3 1.71 0.89
 10 4 3 1.06 0.89
 -10 4 -3 2.67 1.01
 10 -4 -3 1.65 1.06
 10 4 3 2.73 1.07
 10 4 3 0.96 0.92
 10 -4 -3 2.21 0.95
 -11 -4 -3 -0.5 0.85
 11 -4 3 0.81 0.86
 -11 4 3 -1.9 0.61
 11 4 -3 -0.29 0.81
 11 4 -3 -0.74 1
 11 4 -3 0.33 0.96
 11 -4 3 0.09 0.92
 11 -4 3 -0.77 0.84
 11 -4 -3 -0.74 0.86
 11 4 3 0.38 0.84
 11 -4 -3 -0.42 0.94
 -11 4 -3 0.75 1.01
 11 4 3 -0.53 0.94
 11 4 3 1.27 1.15
 11 -4 -3 0.23 0.92
 12 -4 3 0.3 1.03
 12 -4 3 -0.44 1.16
 12 4 -3 0.63 1.15
 12 4 -3 0.06 1.14
 12 4 -3 -0.19 1.06
 -12 4 -3 0.11 0.91
 12 -4 -3 -0.2 0.93
 12 -4 -3 0.09 1.1
 12 -4 -3 0.68 1.06
 12 -4 -3 0.72 1.07
 12 4 3 0.92 1.21
 12 4 3 -0.79 0.91
 12 4 3 1.32 1.11
 13 -4 3 -0.24 1.2
 13 4 -3 -0.95 1.12
 13 4 -3 -0.9 1.14
 13 -4 3 -1.4 1.02
 13 4 -3 -0.66 1.12
 13 4 3 -1.25 1.17
 13 -4 -3 -0.87 1.23
 13 -4 -3 0.73 1.23
 13 -4 -3 0.81 1.37
 13 -4 -3 -0.92 1.1
 -13 4 -3 -0.66 1.01
 13 4 3 0.46 1.3
 13 4 3 -0.47 1.15
 14 4 -3 3.59 1.93
 14 4 -3 -0.29 1.38
 14 -4 3 1.18 1.51
 14 4 -3 1.24 1.41
 -14 4 -3 4.74 1.73
 14 -4 -3 0.73 1.46
 14 -4 -3 2.68 1.58
 14 -4 -3 2.68 1.57
 14 4 3 3.84 1.75
 14 -4 -3 2.63 1.53
 14 4 3 5.17 1.94
 15 4 -3 0.87 1.66
 15 4 -3 -0.82 1.69
 15 4 -3 5.58 2.38
 15 4 3 -0.01 1.83
 15 4 3 0.39 1.72
 15 -4 -3 1.46 1.63
 15 -4 -3 -0.93 1.61
 0 5 -3 -0.04 0.29
 0 5 -3 -0.11 0.22
 0 5 3 -0.22 0.35
 0 5 -3 -0.61 0.17
 0 -5 3 -0.5 0.22
 0 5 3 -0.24 0.28
 0 5 3 -0.35 0.29
 0 -5 3 -0.09 0.26
 0 -5 -3 0.08 0.34
 0 -5 -3 -0.13 0.3
 -1 5 3 73.03 3.39
 -1 5 3 79.62 3.51
 1 5 -3 80.75 3.36
 1 5 -3 76.77 3.39
 -1 5 3 72.72 3.4
 1 -5 3 69.51 3.25
 1 5 -3 74.63 3.38
 1 -5 3 78.45 3.27
 1 -5 3 78.06 3.3
 -1 -5 -3 72.25 3.42
 -1 5 -3 75.66 3.34
 1 -5 -3 72.35 3.43
 1 5 3 77.37 3.47
 -1 5 -3 77.39 3.3
 1 5 3 79.89 3.53
 -1 5 -3 79.24 3.31
 -1 -5 3 71.52 3.27
 2 5 -3 193.14 7.71
 2 -5 3 177.94 7.49
 2 5 -3 191.36 7.85
 2 5 -3 188.71 7.8
 2 -5 3 189.34 7.68
 2 -5 3 180.11 7.63
 -2 -5 -3 189.64 7.83
 2 -5 3 199.08 7.67
 -2 5 3 189.27 7.74
 -2 5 3 201.74 7.81
 -2 -5 3 183.1 7.65
 2 5 3 194.23 7.81
 -2 5 -3 190.27 7.68
 -2 5 -3 180.18 7.62
 2 -5 -3 198.7 7.82
 2 5 3 181.93 7.9
 2 -5 -3 186.42 7.79
 2 5 3 193.69 7.95
 3 -5 3 110.41 4.75
 3 -5 3 109.27 4.64
 3 5 -3 104.44 4.9
 3 -5 3 109.98 4.73
 3 5 -3 105.44 4.8
 3 5 -3 102.18 4.85
 -3 -5 -3 114.22 4.92
 -3 5 3 111.28 4.84
 3 -5 3 109.39 4.74
 -3 5 -3 104.62 4.72
 -3 -5 3 109.74 4.76
 3 5 3 111.44 5.01
 3 5 3 107.4 4.88
 3 5 3 109.69 4.97
 3 -5 -3 109.32 4.85
 3 -5 -3 108.58 4.82
 3 -5 -3 110.01 4.87
 4 -5 3 208.89 8.43
 4 -5 3 186.59 8.51
 4 5 -3 191.21 8.72
 4 5 -3 190.02 8.73
 -4 5 3 208.53 8.64
 4 -5 3 209.15 8.58
 4 5 -3 213.23 8.67
 4 -5 3 214.3 8.59
 4 5 3 219.46 8.93
 4 5 3 197.54 8.78
 4 5 3 210.35 8.72
 -4 -5 3 209.84 8.61
 4 -5 -3 214.91 8.7
 4 -5 -3 206.39 8.67
 4 -5 -3 203.13 8.65
 -4 5 -3 215.92 8.61
 5 5 -3 4.2 0.92
 5 5 -3 3.88 0.92
 5 -5 3 3.64 0.8
 5 -5 3 2.79 0.72
 -5 -5 -3 3.3 0.78
 5 -5 3 3.21 0.76
 5 -5 3 4.45 0.86
 -5 5 3 3.95 0.8
 5 5 -3 4.44 0.86
 -5 5 -3 3.61 0.78
 5 5 3 4.24 0.89
 5 5 3 2.95 0.8
 5 -5 -3 2.75 0.73
 5 -5 -3 5.01 0.88
 5 -5 -3 2.51 0.74
 5 5 3 3.44 0.82
 -5 -5 3 4.74 0.9
 5 -5 -3 4.26 0.9
 6 5 -3 185.65 8.3
 -6 -5 -3 184.24 8.25
 6 -5 3 182.59 8.15
 -6 5 3 182.67 8.16
 6 -5 3 180.24 8.12
 6 5 -3 185.17 8.44
 6 -5 3 189.37 8.03
 6 -5 3 180.65 8.13
 6 5 -3 192.52 8.45
 6 5 3 196.55 8.59
 6 -5 -3 179.25 8.21
 6 -5 -3 196.27 8.17
 6 -5 -3 181.26 8.2
 -6 -5 3 183.25 8.15
 6 5 3 194.5 8.35
 6 5 3 192.85 8.5
 -6 5 -3 195.57 8.22
 6 -5 -3 187.56 8.27
 7 -5 3 6.83 1.19
 7 5 -3 6.41 1.29
 7 5 -3 5.73 1.24
 7 -5 3 5.8 1.14
 -7 5 3 4.45 1.02
 7 5 -3 5.19 1.19
 7 -5 3 6.24 1.13
 -7 -5 -3 3.75 1.04
 7 5 3 4.5 1.19
 7 5 3 9.7 1.51
 7 5 3 5.99 1.27
 -7 -5 3 5.25 1.07
 -7 5 -3 4.56 1.03
 7 -5 -3 4.77 1.11
 7 -5 -3 7.65 1.28
 7 -5 -3 6.37 1.17
 7 -5 -3 5.26 1.14
 8 5 -3 200.37 9.31
 8 5 -3 198.69 9.16
 8 -5 3 199.08 8.88
 -8 5 3 195.62 8.99
 8 5 -3 185.9 9.18
 8 -5 3 221.74 9.14
 8 -5 3 199.29 9
 8 -5 -3 193.22 8.88
 8 5 3 185.86 9.23
 8 -5 -3 216.82 9.19
 8 5 3 197.56 9.19
 8 5 3 193.11 9.3
 -8 -5 3 208.32 9.03
 8 -5 -3 205.68 9.14
 -8 5 -3 191.98 8.94
 8 -5 -3 194.42 9.03
 -9 5 3 9.13 1.53
 9 5 -3 8.74 1.68
 9 -5 3 9.71 1.65
 9 -5 3 6.36 1.33
 9 5 -3 8.66 1.55
 9 -5 3 8.82 1.66
 9 5 -3 6.63 1.43
 -9 -5 -3 8.05 1.51
 9 5 3 7.48 1.55
 9 -5 -3 9.42 1.56
 9 -5 -3 4.74 1.22
 9 -5 -3 10.09 1.66
 -9 5 -3 7.33 1.42
 9 5 3 10.1 1.78
 9 -5 -3 7.85 1.49
 9 5 3 6.6 1.45
 -10 5 3 78.57 4.56
 10 5 -3 69.22 4.71
 10 -5 3 84.22 4.64
 10 5 -3 76.73 4.73
 10 -5 3 71 4.6
 10 -5 3 73.23 4.49
 10 5 -3 71.85 4.73
 10 -5 3 74 4.52
 -10 -5 -3 74 4.51
 10 5 3 76.32 4.83
 10 5 3 75.05 4.7
 10 -5 -3 69.98 4.41
 10 -5 -3 70.57 4.53
 10 5 3 77.29 4.83
 10 -5 -3 79.31 4.65
 -10 5 -3 76.15 4.56
 11 5 -3 4.52 1.4
 11 -5 3 5.46 1.48
 11 -5 3 7.91 1.65
 11 5 -3 5.99 1.61
 -11 -5 -3 9.53 1.67
 -11 5 3 9.81 1.88
 11 -5 3 5.33 1.42
 11 5 -3 3.44 1.35
 11 -5 3 4.63 1.37
 11 -5 -3 7.32 1.63
 11 -5 -3 5.83 1.42
 11 5 3 6.96 1.76
 11 -5 -3 3.37 1.38
 11 5 3 8.03 1.76
 -11 5 -3 7.11 1.51
 11 5 3 7.31 1.69
 12 5 -3 7.98 1.8
 12 -5 3 11.48 2.19
 12 5 -3 12.15 2.27
 12 -5 3 7.01 1.8
 12 5 -3 10.43 2.26
 12 -5 -3 10.34 2.02
 12 5 3 4.69 1.67
 -12 5 -3 9.12 1.81
 12 -5 -3 10.42 2.03
 12 -5 -3 13.15 2.21
 12 5 3 7.25 1.92
 12 5 3 8.05 2.02
 13 5 -3 28.85 3.19
 13 5 -3 25.51 3.15
 13 -5 3 27.36 3.17
 13 5 -3 30.86 3.44
 13 -5 -3 25.9 2.92
 13 -5 -3 33.74 3.47
 13 5 3 23.64 3.12
 -13 5 -3 30.8 3.18
 13 5 3 33.06 3.27
 13 5 3 23.41 3.45
 13 -5 -3 30.99 3.18
 13 -5 -3 33.2 3.19
 14 5 -3 0.48 1.46
 14 5 -3 0.75 1.59
 14 5 -3 3.34 1.86
 14 -5 -3 0.42 1.62
 14 -5 -3 0.82 1.52
 14 5 3 -0.24 1.58
 14 5 3 2.34 1.68
 -14 5 -3 3.04 1.57
 14 -5 -3 3.4 1.63
 15 5 -3 25.05 3.88
 15 5 -3 14.91 3.1
 15 5 -3 20.5 3.59
 15 5 3 28.37 4.01
 15 5 3 21.3 3.63
 15 -5 -3 20.38 3.58
 15 -5 -3 25.31 3.7
 0 -6 -3 8.03 0.83
 0 6 -3 5.28 0.65
 0 6 3 5.62 0.76
 0 6 3 7.22 0.79
 0 -6 3 6.27 0.66
 0 6 -3 7.32 0.73
 0 6 -3 4.94 0.67
 0 6 3 6.76 0.83
 0 -6 -3 5.74 0.79
 0 -6 3 6.35 0.66
 1 6 -3 25.43 1.51
 1 -6 3 26.4 1.48
 -1 -6 -3 25.5 1.59
 1 6 -3 26 1.49
 -1 6 3 24.52 1.54
 -1 6 3 23.11 1.52
 -1 -6 -3 25.54 1.6
 1 -6 3 22.68 1.4
 -1 6 3 25.33 1.6
 1 6 -3 23.35 1.5
 1 6 3 26.62 1.62
 1 -6 -3 23.52 1.53
 1 6 3 27.55 1.67
 -1 6 -3 25.8 1.5
 -1 -6 3 25.8 1.49
 -1 6 -3 24.62 1.44
 -1 6 -3 26.33 1.47
 -1 -6 3 25.64 1.44
 1 -6 -3 27.48 1.59
 -2 6 3 29.04 1.75
 2 -6 3 29.76 1.56
 2 6 -3 26.13 1.69
 -2 6 3 29.89 1.72
 2 6 -3 26.42 1.65
 2 -6 3 29.07 1.59
 -2 -6 -3 27.94 1.79
 2 -6 3 26.95 1.62
 2 -6 3 25.61 1.57
 2 6 -3 26.79 1.69
 -2 6 -3 29.81 1.65
 2 6 3 27.23 1.8
 -2 -6 3 26.33 1.58
 2 6 3 24.3 1.76
 2 -6 -3 30.28 1.76
 2 -6 -3 28.29 1.71
 -2 6 -3 27.56 1.62
 -2 6 -3 31.14 1.7
 2 6 3 32.38 1.84
 3 -6 3 5.04 0.73
 3 -6 3 6.34 0.75
 3 6 -3 4.21 0.76
 -3 6 3 5.32 0.81
 -3 -6 -3 3.83 0.74
 3 6 -3 4.83 0.77
 3 6 -3 4.45 0.74
 3 -6 3 4.22 0.71
 3 -6 3 4.55 0.73
 -3 -6 3 3.25 0.65
 3 -6 -3 4.88 0.83
 3 6 3 5.17 0.86
 3 6 3 3.06 0.75
 3 -6 -3 4.76 0.77
 3 -6 -3 4 0.74
 -3 6 -3 7.28 0.84
 3 6 3 3.43 0.8
 -4 -6 -3 0 0.44
 4 -6 3 0.13 0.4
 4 6 -3 0.3 0.37
 4 -6 3 -0.58 0.39
 4 -6 3 -0.41 0.39
 4 6 -3 -0.56 0.43
 4 -6 3 0.23 0.46
 4 6 -3 0.49 0.39
 -4 6 3 -0.25 0.32
 4 6 3 -0.66 0.4
 4 -6 -3 0.78 0.53
 -4 -6 3 0.02 0.39
 4 6 3 0.33 0.5
 4 -6 -3 0.42 0.47
 -4 6 -3 0.14 0.4
 4 -6 -3 0.22 0.39
 4 6 3 -0.3 0.43
 4 -6 -3 0.19 0.44
 5 -6 3 0.92 0.53
 5 6 -3 1.1 0.51
 -5 -6 -3 1.64 0.67
 5 -6 3 1.02 0.61
 -5 6 3 2.44 0.69
 5 -6 3 1.13 0.64
 5 6 -3 1.24 0.62
 5 -6 3 0.97 0.58
 5 6 3 0.98 0.65
 5 -6 -3 0.73 0.53
 5 -6 -3 1.63 0.64
 5 -6 -3 1.35 0.65
 5 -6 -3 2.93 0.72
 -5 -6 3 1.26 0.63
 -5 6 -3 2.17 0.66
 5 6 3 2.3 0.75
 5 6 3 1.5 0.74
 6 -6 3 -0.06 0.5
 6 -6 3 0.62 0.58
 -6 6 3 -0.36 0.47
 6 6 -3 0.94 0.68
 6 -6 3 0.19 0.55
 6 -6 3 -0.89 0.49
 -6 -6 -3 -0.33 0.57
 6 6 -3 -0.41 0.53
 6 6 3 -0.47 0.57
 -6 -6 3 -0.06 0.5
 6 -6 -3 -0.41 0.57
 6 -6 -3 0.65 0.63
 6 6 3 0.32 0.66
 6 -6 -3 0.74 0.64
 6 -6 -3 -0.22 0.59
 -6 6 -3 -0.15 0.54
 6 6 3 0.42 0.59
 7 -6 3 5.69 1.21
 7 6 -3 3.32 1.02
 7 -6 3 3.39 0.9
 -7 6 3 4.25 1.07
 7 6 -3 1.92 0.91
 7 6 -3 5.47 1.2
 7 -6 3 5.51 1.12
 -7 -6 -3 3.66 0.99
 7 -6 3 5.4 1.09
 7 -6 -3 4.36 1.04
 7 6 3 4.33 1.17
 7 6 3 4.59 1.19
 -7 -6 3 3.55 0.95
 7 6 3 4.22 1.11
 7 -6 -3 4.18 1.06
 7 -6 -3 4.33 1.06
 7 -6 -3 4.81 1.11
 -7 6 -3 4.32 1
 8 -6 3 3.28 1.09
 8 6 -3 1.93 0.91
 8 -6 3 0.99 0.72
 -8 6 3 3.18 1.03
 8 6 -3 2.13 0.86
 -8 -6 -3 2.27 0.95
 8 6 -3 1.8 0.91
 8 6 3 2.69 1.02
 8 6 3 3.91 1.19
 8 -6 -3 1.11 0.77
 -8 6 -3 1.27 0.75
 8 -6 -3 3.1 0.98
 8 -6 -3 2.02 0.81
 8 6 3 2.01 0.96
 8 -6 -3 1.71 0.89
 -9 6 3 4.75 1.18
 9 6 -3 4.39 1.22
 9 6 -3 3.78 1.13
 9 6 -3 6.8 1.46
 9 -6 3 4.52 1.23
 9 -6 3 5.43 1.22
 -9 -6 -3 7.51 1.46
 9 6 3 5.9 1.45
 9 6 3 5.66 1.43
 9 -6 -3 2.42 1.06
 9 -6 -3 5.92 1.37
 -9 6 -3 3.25 1.07
 9 -6 -3 5.19 1.34
 9 -6 -3 4.65 1.26
 9 6 3 2.85 1.07
 10 -6 3 1.88 0.97
 -10 6 3 1.37 0.89
 10 6 -3 -0.37 0.89
 10 -6 3 1.43 0.92
 -10 -6 -3 -0.05 0.77
 10 6 -3 -0.83 0.87
 10 6 -3 1.39 0.97
 10 -6 -3 0.83 0.86
 -10 6 -3 1.35 0.93
 10 -6 -3 0.09 0.78
 10 6 3 0.73 1.02
 10 6 3 0.32 0.86
 10 -6 -3 0.93 0.81
 10 6 3 2.26 1.03
 10 -6 -3 1.15 0.91
 11 -6 3 2.58 1.09
 11 -6 3 2.89 1.14
 11 6 -3 0.81 1.13
 11 6 -3 4.73 1.55
 -11 6 3 3.04 1.16
 -11 -6 -3 0.76 1
 11 6 -3 4.45 1.52
 11 -6 -3 2.67 1.07
 11 -6 -3 1.5 1.19
 11 6 3 2.59 1.25
 11 6 3 3.6 1.31
 11 -6 -3 3.1 1.2
 11 6 3 2.53 1.28
 -11 6 -3 4.98 1.42
 12 6 -3 4.09 1.67
 12 6 -3 2.73 1.46
 12 6 -3 3.34 1.44
 12 -6 3 0.88 1.13
 12 -6 3 2.46 1.33
 -12 6 -3 2.62 1.24
 12 -6 -3 5.3 1.45
 12 6 3 2.6 1.21
 12 6 3 2.53 1.37
 12 -6 -3 5.19 1.55
 12 6 3 3.74 1.55
 13 6 -3 1.16 1.39
 13 6 -3 0.09 1.44
 13 -6 3 0.06 1.06
 13 6 -3 0.31 1.3
 13 6 3 -1.14 1.38
 13 6 3 0.51 1.33
 13 -6 -3 0.78 1.23
 13 -6 -3 -1.5 1.14
 13 -6 -3 0.74 1.18
 13 6 3 0.04 1.14
 -13 6 -3 1.08 1.21
 14 6 -3 2.08 1.65
 14 6 -3 3.65 1.84
 14 6 -3 0.68 1.51
 -14 6 -3 0.67 1.44
 14 -6 -3 1.84 1.71
 14 6 3 2.53 1.5
 14 -6 -3 0.54 1.4
 14 6 3 1.09 1.55
 15 6 -3 -0.31 1.62
 15 6 3 1.39 2.07
 15 -6 -3 -0.15 1.77
 15 -6 -3 -1.85 1.83
 15 6 3 -2.98 1.65
 0 -7 -3 -0.28 0.32
 0 7 -3 -0.03 0.29
 0 -7 3 -0.32 0.27
 0 7 3 0.63 0.39
 0 7 3 -0.05 0.35
 0 7 3 -0.15 0.33
 0 7 -3 0.34 0.33
 0 -7 3 0.11 0.31
 0 -7 -3 -0.07 0.33
 0 7 -3 -0.14 0.23
 1 -7 3 80.89 3.73
 1 7 -3 82 3.86
 -1 -7 -3 84.78 3.94
 -1 7 3 85.91 3.91
 1 7 -3 90.96 3.95
 -1 7 3 91.71 4.03
 -1 -7 -3 86.23 3.97
 1 7 -3 77.51 3.77
 -1 7 3 85.8 3.91
 1 -7 3 85.43 3.78
 1 -7 -3 78.43 3.85
 1 -7 -3 83.46 3.92
 -1 -7 3 84.56 3.76
 1 7 3 81.93 3.89
 -1 7 -3 80.45 3.82
 1 7 3 80.13 3.9
 -1 7 -3 87.51 3.82
 -1 7 -3 82.22 3.77
 -1 -7 3 88.14 3.82
 2 -7 3 140.77 6.1
 2 7 -3 138.62 6.16
 2 7 -3 143.97 6.27
 2 -7 3 148.76 6.1
 2 -7 3 146.68 5.97
 -2 7 3 149.89 6.34
 2 7 -3 143.19 6.28
 -2 7 3 154.35 6.28
 -2 7 3 145.8 6.24
 -2 -7 -3 139.38 6.25
 2 -7 3 134.66 6.04
 2 -7 -3 143.46 6.26
 2 7 3 147.4 6.43
 -2 7 -3 135.97 6.09
 -2 7 -3 145.15 6.21
 2 -7 -3 142.26 6.23
 -2 -7 3 142.28 6.09
 2 7 3 145.94 6.28
 -2 7 -3 151.45 6.17
 2 7 3 146.12 6.4
 3 7 -3 70.6 3.41
 3 -7 3 69.75 3.29
 -3 7 3 63.81 3.34
 3 -7 3 61.53 3.15
 3 7 -3 68.35 3.45
 -3 -7 -3 65.17 3.4
 3 7 -3 69.45 3.49
 3 -7 3 64.01 3.26
 3 -7 3 65.7 3.27
 3 -7 -3 69.19 3.38
 3 7 3 69.1 3.53
 3 -7 -3 67.84 3.39
 3 7 3 68.47 3.54
 -3 -7 3 66.84 3.28
 -3 7 -3 69.39 3.33
 -3 7 -3 65.59 3.27
 3 7 3 73.79 3.54
 4 -7 3 78.28 3.99
 4 7 -3 86.44 4.25
 4 -7 3 82.29 4.02
 4 7 -3 88.7 4.21
 4 7 -3 83.67 4.24
 4 -7 3 82.42 4.02
 -4 7 3 78.99 4.07
 4 -7 3 91.77 4.01
 -4 -7 -3 84.22 4.17
 -4 7 -3 89.69 4.11
 4 -7 -3 93.08 4.23
 4 7 3 80.15 4.28
 4 -7 -3 80.63 4.01
 -4 -7 3 89.37 4.1
 4 7 3 89.51 4.39
 4 7 3 83.96 4.23
 4 -7 -3 76.7 4.08
 4 -7 -3 81.22 4.08
 5 7 -3 20.29 1.66
 5 7 -3 18.91 1.62
 5 -7 3 20.06 1.63
 -5 7 3 19.31 1.61
 5 -7 3 16.73 1.56
 5 -7 3 20.75 1.63
 5 -7 3 19.35 1.65
 -5 -7 -3 16.76 1.64
 5 7 3 15.09 1.6
 5 -7 -3 22.44 1.73
 5 -7 -3 21.45 1.71
 -5 7 -3 20.26 1.62
 5 7 3 20.42 1.93
 5 -7 -3 17.46 1.67
 -5 -7 3 20.83 1.65
 5 -7 -3 20.18 1.62
 5 7 3 19.54 1.81
 -6 7 3 126.34 5.95
 6 -7 3 127.33 5.89
 6 -7 3 118.03 5.71
 -6 -7 -3 119.21 5.92
 6 -7 3 135.21 5.96
 6 7 -3 111.97 5.95
 6 -7 3 125.97 5.87
 6 7 -3 131.42 6.25
 6 -7 -3 133.12 6.02
 6 7 3 126.07 6.19
 6 -7 -3 122.22 5.97
 6 7 3 123 6.19
 -6 -7 3 120.14 5.85
 -6 7 -3 124.48 5.88
 6 -7 -3 131.76 6.03
 6 -7 -3 126.82 5.88
 6 7 3 119.95 6.04
 7 -7 3 13.1 1.65
 7 -7 3 11.04 1.42
 -7 7 3 8 1.36
 -7 -7 -3 9.49 1.5
 7 7 -3 11.52 1.47
 7 7 -3 10.05 1.54
 7 -7 3 11.91 1.47
 7 -7 3 15.24 1.67
 7 7 3 13.04 1.73
 7 -7 -3 9.73 1.54
 -7 -7 3 10.64 1.43
 7 -7 -3 9.08 1.39
 -7 7 -3 9.92 1.52
 7 7 3 10.05 1.61
 7 -7 -3 9.95 1.32
 7 7 3 9.73 1.66
 7 -7 -3 10.32 1.5
 8 7 -3 110.08 6.05
 8 7 -3 107.25 6.01
 -8 -7 -3 110.46 5.88
 -8 7 3 119.03 5.87
 8 7 -3 125.78 6.15
 8 -7 3 113.77 5.8
 8 -7 3 113.86 5.79
 8 7 3 105.31 5.99
 8 -7 -3 100.46 5.73
 -8 7 -3 119.04 5.85
 8 -7 -3 118.71 5.92
 8 7 3 107.72 6.07
 8 7 3 120.31 6.06
 8 -7 -3 133.79 6.11
 8 -7 -3 117.77 5.83
 9 7 -3 15.25 2
 -9 7 3 11.53 1.63
 -9 -7 -3 13.41 1.96
 9 -7 3 16.1 2
 9 -7 3 16.25 1.77
 9 7 -3 13.02 1.99
 9 7 -3 19.11 2.11
 9 7 3 17.6 2.05
 9 -7 -3 10.68 1.89
 9 -7 -3 14.59 1.85
 9 -7 -3 17.55 1.92
 9 7 3 14.07 1.87
 9 -7 -3 14.71 2.03
 9 7 3 13.85 2.12
 -9 7 -3 16.19 1.8
 10 7 -3 35.72 3.15
 10 7 -3 39.93 3.4
 10 -7 3 35.73 2.92
 -10 -7 -3 40.91 3.11
 10 7 -3 33.2 3.12
 -10 7 3 41.54 3.09
 10 7 3 41.52 3.38
 10 -7 -3 37.08 3.11
 10 -7 -3 43.37 3.18
 10 7 3 41.98 3.37
 -10 7 -3 39.02 3.06
 10 -7 -3 39.99 3.17
 10 7 3 40.13 3.35
 10 -7 -3 47.28 3.29
 -11 7 3 15.68 2.15
 11 7 -3 19.09 2.45
 11 7 -3 17.33 2.65
 11 7 -3 19.93 2.48
 11 -7 3 19.8 2.29
 11 7 3 16.12 2.57
 11 -7 -3 21.41 2.36
 11 -7 -3 22.44 2.5
 11 7 3 18.36 2.33
 11 7 3 14.71 2.38
 -11 7 -3 22.34 2.37
 12 7 -3 0.2 1.2
 12 -7 3 1.13 1.21
 12 7 -3 1.84 1.32
 12 -7 3 -0.85 0.99
 12 7 -3 -0.05 1.34
 12 7 3 2.85 1.39
 12 7 3 1.34 1.16
 12 -7 -3 2.59 1.3
 -12 7 -3 1.47 1.09
 12 -7 -3 -0.7 1.06
 12 7 3 0.4 1.23
 13 7 -3 18.09 3.02
 13 7 -3 28.35 3.33
 13 7 -3 25.59 3.15
 13 7 3 17.43 2.84
 13 -7 -3 25.26 2.93
 13 -7 -3 24.89 3.03
 -13 7 -3 22.04 2.85
 13 7 3 32.28 3.45
 13 7 3 21.19 3.12
 14 7 -3 2.04 1.68
 14 7 -3 -0.11 1.58
 14 7 -3 1.4 1.75
 -14 7 -3 1.68 1.43
 14 7 3 -0.9 1.27
 14 7 3 0.07 1.48
 14 -7 -3 2.61 1.76
 14 -7 -3 3.74 1.73
 15 7 -3 9.17 2.65
 15 -7 -3 11.32 2.87
 15 -7 -3 16.88 3.13
 15 7 3 9.46 2.67
 0 8 -3 0.39 0.36
 0 8 -3 0.18 0.36
 0 8 3 0.37 0.35
 0 -8 -3 0.48 0.42
 0 -8 -3 -0.22 0.35
 0 8 3 0.25 0.45
 0 -8 3 0.08 0.34
 0 -8 3 0.54 0.38
 0 8 -3 0.79 0.4
 0 8 3 -0.03 0.35
 1 8 -3 12.27 1.11
 -1 -8 -3 14.47 1.26
 1 8 -3 14.78 1.23
 1 8 -3 13.42 1.12
 1 -8 3 12.69 1.07
 -1 8 3 15.92 1.25
 -1 8 3 11.89 1.23
 -1 8 3 12.64 1.28
 -1 -8 -3 12.97 1.27
 1 -8 3 13.96 1.15
 -1 -8 3 13.72 1.11
 1 8 3 14.07 1.22
 -1 8 -3 15.22 1.17
 1 -8 -3 15.44 1.27
 1 8 3 15.5 1.32
 1 -8 -3 16.3 1.29
 -1 8 -3 13.34 1.08
 -1 -8 3 13.29 1.09
 -1 8 -3 15.44 1.19
 1 8 3 13.84 1.29
 -2 8 3 0.96 0.59
 2 8 -3 1 0.48
 2 8 -3 1.2 0.52
 -2 -8 -3 1.65 0.53
 2 -8 3 1.06 0.46
 2 8 -3 2.86 0.59
 -2 8 3 0.8 0.47
 -2 8 3 0.98 0.52
 2 -8 3 1.9 0.51
 2 -8 3 0.9 0.44
 2 8 3 1.93 0.68
 2 8 3 1.65 0.61
 2 8 3 1.87 0.6
 -2 8 -3 1.89 0.54
 2 -8 -3 0.69 0.51
 2 -8 -3 0.42 0.43
 -2 8 -3 2.54 0.58
 -2 -8 3 1.49 0.52
 -2 8 -3 0.7 0.34
 3 8 -3 3.69 0.74
 3 -8 3 6.51 0.84
 3 -8 3 4.83 0.79
 -3 -8 -3 5.52 0.96
 3 -8 3 4.05 0.77
 3 8 -3 3.57 0.78
 3 8 -3 3.87 0.78
 -3 8 3 3.55 0.78
 3 -8 3 3.29 0.66
 -3 8 3 4.89 0.93
 -3 8 -3 4.48 0.84
 3 8 3 5.48 1
 -3 -8 3 3.89 0.78
 3 -8 -3 3.96 0.81
 -3 8 -3 6.13 0.82
 3 -8 -3 4.19 0.85
 3 8 3 4.29 0.92
 3 8 3 4.61 0.91
 4 -8 3 1.27 0.57
 4 8 -3 1.68 0.65
 4 8 -3 3.07 0.69
 4 -8 3 0.58 0.52
 4 -8 3 1.49 0.6
 -4 -8 -3 0.75 0.52
 -4 8 3 0.42 0.5
 4 -8 3 0.79 0.54
 4 8 3 0.71 0.6
 4 8 3 1.16 0.69
 4 8 3 -0.22 0.56
 -4 8 -3 0.23 0.47
 -4 -8 3 0.81 0.59
 4 -8 -3 1.09 0.61
 4 -8 -3 1.34 0.63
 4 -8 -3 1.95 0.67
 5 -8 3 5.86 0.99
 -5 -8 -3 5.05 1.06
 5 -8 3 3.13 0.81
 5 8 -3 5.37 1.1
 5 -8 3 5.38 1.04
 5 -8 3 5.84 1.01
 -5 8 3 5.07 1.01
 5 8 3 4.86 1.11
 5 8 3 4.12 1.05
 5 -8 -3 4.1 0.88
 5 -8 -3 4.73 0.98
 -5 -8 3 6.37 1.07
 5 8 3 4.95 1.07
 5 -8 -3 4.82 1.05
 5 -8 -3 5.14 1.04
 -5 8 -3 5.2 0.98
 6 -8 3 -0.85 0.59
 6 -8 3 -0.24 0.57
 6 8 -3 -0.29 0.62
 6 -8 3 0.36 0.56
 -6 -8 -3 0.8 0.66
 -6 8 3 -0.1 0.55
 6 -8 3 0.25 0.6
 6 8 -3 0.14 0.61
 -6 8 -3 0.85 0.69
 6 -8 -3 -0.07 0.6
 6 -8 -3 -0.22 0.53
 6 -8 -3 -0.02 0.62
 6 -8 -3 0.37 0.69
 6 8 3 0.11 0.74
 6 8 3 1.11 0.73
 -6 -8 3 -0.55 0.61
 6 8 3 0.35 0.65
 7 -8 3 32.94 2.52
 7 8 -3 35.23 2.61
 -7 -8 -3 32.4 2.5
 -7 8 3 33.84 2.49
 7 -8 3 35.87 2.57
 7 8 -3 37.7 2.71
 7 8 3 31.72 2.62
 7 -8 -3 34.69 2.62
 7 -8 -3 31.24 2.44
 -7 8 -3 34.98 2.48
 7 8 3 35.19 2.7
 7 -8 -3 32.82 2.55
 7 -8 -3 36.54 2.56
 7 8 3 37.54 2.76
 -8 -8 -3 4.04 1.16
 8 -8 3 3.08 1.12
 8 8 -3 6.07 1.31
 8 -8 3 4.48 1.08
 -8 8 3 3.14 1.06
 8 8 -3 3.05 1.14
 8 8 -3 4.91 1.27
 8 8 3 3.63 1.15
 8 -8 -3 3.73 1.06
 8 8 3 2.03 1
 8 -8 -3 3.37 1.17
 8 -8 -3 2.49 0.98
 8 -8 -3 2.99 1.03
 -8 8 -3 5.3 1.17
 8 8 3 3.99 1.21
 9 8 -3 28.8 2.55
 -9 8 3 18.29 1.98
 9 -8 3 19.31 2.19
 9 8 -3 20.69 2.25
 -9 -8 -3 21.63 2.31
 9 -8 3 21.04 2.06
 9 8 -3 21.63 2.36
 9 8 3 18.24 2.14
 9 8 3 23.57 2.45
 9 -8 -3 21.94 2.15
 9 8 3 21.57 2.37
 9 -8 -3 23.31 2.2
 -9 8 -3 20.32 2.12
 9 -8 -3 24.99 2.37
 9 -8 -3 21 2.13
 10 -8 3 4.98 1.42
 -10 8 3 4.94 1.27
 10 8 -3 6.13 1.62
 10 8 -3 8.14 1.72
 10 8 -3 3.19 1.29
 -10 8 -3 7.26 1.57
 10 8 3 4.35 1.41
 10 8 3 6.77 1.7
 10 8 3 5.38 1.54
 10 -8 -3 4.62 1.42
 10 -8 -3 7.85 1.69
 11 8 -3 1.82 1.25
 11 8 -3 2.5 1.29
 -11 8 3 -0.75 0.8
 11 8 -3 2.61 1.33
 11 -8 3 0.55 1
 11 8 3 0.68 1.13
 11 8 3 1.13 1.23
 11 -8 -3 -0.81 0.82
 11 -8 -3 0.56 0.9
 11 8 3 1.16 1.21
 -11 8 -3 0.39 0.82
 12 8 -3 0.73 1.32
 12 8 -3 2.5 1.44
 12 -8 3 -0.05 1.11
 12 8 -3 2.56 1.34
 12 8 3 3.06 1.35
 12 8 3 1.86 1.39
 12 8 3 1.95 1.4
 12 -8 -3 3.32 1.35
 -12 8 -3 4.17 1.37
 12 -8 -3 2.18 1.26
 13 8 -3 0.74 1.51
 13 8 -3 0.34 1.29
 13 8 -3 0.5 1.3
 13 -8 3 -0.21 1.37
 13 -8 -3 -1.88 1.07
 13 -8 -3 -0.97 1.11
 13 8 3 0.22 1.19
 13 8 3 -0.15 1.4
 -13 8 -3 0.22 1.29
 13 8 3 -0.05 1.37
 14 8 -3 4.21 1.98
 14 8 -3 2.78 1.65
 14 8 -3 1.22 1.54
 14 -8 -3 2.9 1.68
 -14 8 -3 2.18 1.59
 14 8 3 -1.35 1.54
 14 8 3 0.66 1.52
 15 -8 -3 1.28 1.9
 0 9 -3 -0.51 0.28
 0 9 3 -0.18 0.45
 0 -9 3 -0.18 0.31
 0 9 3 0.29 0.42
 0 -9 -3 0.03 0.39
 0 9 -3 0.18 0.3
 0 9 3 0.09 0.4
 0 -9 -3 -0.4 0.36
 0 9 -3 -0.24 0.33
 0 -9 3 0.03 0.42
 -1 9 3 87.95 4.22
 1 -9 3 85.28 3.97
 -1 -9 -3 82.92 4.09
 -1 9 3 81.53 4.12
 1 9 -3 86.04 4.12
 1 9 -3 87.43 4.06
 -1 9 3 81.92 4.07
 -1 -9 -3 87.24 4.15
 1 -9 3 84.53 3.94
 -1 9 -3 82.92 3.99
 1 -9 -3 91.61 4.15
 1 -9 -3 84.99 4.13
 1 9 3 87.62 4.17
 1 9 3 83.43 4.16
 1 9 3 76.31 4.15
 -1 9 -3 89.05 4.1
 -1 9 -3 83.87 3.99
 -1 -9 3 82.33 3.91
 -1 -9 3 83.01 3.95
 -2 -9 -3 74.44 3.69
 2 9 -3 69.57 3.64
 -2 9 3 70.42 3.59
 -2 9 3 65.44 3.62
 2 -9 3 72.83 3.48
 -2 9 3 66.67 3.6
 -2 -9 -3 68.84 3.64
 2 9 -3 69.82 3.61
 2 9 -3 66.81 3.52
 2 -9 3 67.67 3.42
 2 -9 3 75.65 3.5
 -2 9 -3 71.97 3.51
 -2 -9 3 67.41 3.47
 -2 9 -3 74.96 3.62
 2 9 3 71.55 3.69
 2 9 3 75.61 3.81
 2 -9 -3 66.02 3.57
 -2 -9 3 75.01 3.5
 -2 9 -3 72.7 3.52
 2 9 3 73.58 3.75
 2 -9 -3 74.57 3.64
 3 -9 3 45.4 2.54
 -3 9 3 49.83 2.73
 -3 9 3 47.03 2.75
 3 -9 3 45.35 2.57
 3 -9 3 46.56 2.57
 3 9 -3 48.89 2.78
 3 -9 3 46.7 2.49
 3 9 -3 47.95 2.72
 -3 -9 -3 46.01 2.72
 -3 -9 3 42.72 2.55
 3 9 3 50.86 2.88
 3 9 3 43.19 2.82
 -3 9 -3 45.07 2.61
 -3 9 -3 44.04 2.63
 3 9 3 45.73 2.84
 3 -9 -3 40.43 2.61
 3 -9 -3 52.08 2.79
 4 -9 3 113.43 5.14
 -4 -9 -3 104.09 5.24
 4 9 -3 112.4 5.3
 -4 9 3 104.91 5.19
 4 -9 3 110.46 5.14
 4 -9 3 118.42 5.05
 4 -9 3 106.68 5.1
 4 -9 -3 111.28 5.28
 4 9 3 105.31 5.4
 -4 9 -3 108.32 5.16
 -4 -9 3 115.53 5.21
 4 9 3 100.97 5.37
 4 9 3 116.06 5.41
 4 -9 -3 107.91 5.26
 4 -9 -3 103.91 5.17
 -5 9 3 2.53 0.84
 5 -9 3 2.88 0.86
 5 -9 3 2.97 0.8
 5 -9 3 2.39 0.75
 5 9 -3 3.48 0.98
 5 -9 3 2.69 0.84
 -5 -9 -3 1.21 0.72
 5 9 3 2.45 0.92
 5 9 3 3.64 1.02
 5 -9 -3 3.6 0.97
 5 -9 -3 2.8 0.87
 5 -9 -3 3.33 0.91
 5 -9 -3 4.49 0.99
 5 9 3 3.66 1.01
 -5 9 -3 2.34 0.81
 -5 -9 3 3.66 0.94
 -6 9 3 124.28 6.13
 6 -9 3 126.4 6.05
 6 9 -3 125.93 6.21
 -6 -9 -3 135.05 6.27
 6 -9 3 132.2 6.07
 6 9 3 124.44 6.41
 6 -9 -3 130.41 6.2
 6 -9 -3 121.24 6.12
 6 9 3 125.47 6.39
 -6 9 -3 125.42 6.06
 6 -9 -3 127.91 6.15
 6 9 3 119.06 6.21
 6 -9 -3 131.25 6.08
 -7 9 3 5.67 1.2
 7 9 -3 6.78 1.36
 7 9 -3 7.73 1.42
 -7 -9 -3 7.44 1.41
 7 -9 3 3.66 1.03
 7 -9 3 4.57 1.14
 7 9 3 6.67 1.38
 7 -9 -3 7.43 1.41
 7 9 3 3.88 1.14
 7 9 3 4.37 1.17
 7 -9 -3 7.57 1.45
 -7 9 -3 6.42 1.18
 7 -9 -3 3.53 1.05
 7 -9 -3 6.87 1.27
 8 9 -3 87.79 5.08
 8 9 -3 86.96 5
 8 -9 3 77.64 4.59
 -8 9 3 81.11 4.74
 8 9 -3 92.99 5.14
 -8 -9 -3 92.21 4.96
 8 -9 3 83.2 4.76
 8 9 3 88.05 5.09
 8 -9 -3 79.2 4.69
 8 -9 -3 84.66 4.81
 8 9 3 79.09 4.86
 8 -9 -3 89.99 4.93
 8 -9 -3 87.71 4.81
 8 9 3 91.75 5.2
 -8 9 -3 82.06 4.69
 9 9 -3 12.71 2.06
 -9 9 3 7.94 1.6
 9 9 -3 15.48 2.07
 -9 -9 -3 11.83 1.86
 9 -9 3 16.15 1.85
 9 9 -3 14.17 2.19
 9 -9 -3 13.24 1.97
 -9 9 -3 16.99 1.93
 9 9 3 16.46 2.09
 9 -9 -3 17.67 1.96
 9 9 3 14.21 2.2
 9 9 3 17.46 2.16
 9 -9 -3 18.15 1.97
 9 -9 -3 16.7 1.91
 10 9 -3 47.26 3.9
 10 9 -3 53.56 3.94
 10 9 -3 49.31 3.84
 -10 9 3 48.82 3.6
 10 -9 3 48.41 3.57
 -10 9 -3 54.6 3.73
 10 -9 -3 50.23 3.71
 10 -9 -3 52.46 3.72
 10 9 3 47.48 3.87
 10 9 3 54.47 4.01
 10 9 3 52.59 3.88
 11 9 -3 28.92 3.02
 11 9 -3 30.51 3.15
 11 9 -3 28 3.06
 11 -9 3 32.76 2.92
 -11 9 3 28.04 2.78
 11 -9 -3 30.68 2.91
 11 -9 -3 29.32 2.86
 11 9 3 25.33 2.86
 11 9 3 35.09 3.35
 -11 9 -3 36.52 3.07
 11 9 3 26.12 2.96
 12 9 -3 -0.18 1.18
 12 -9 3 -0.06 1.01
 12 9 -3 0.9 1.47
 12 9 -3 0.68 1.11
 12 9 3 -0.11 1.18
 12 9 3 -0.44 1.16
 12 -9 -3 -0.92 1.14
 12 -9 -3 0.61 1.1
 -12 9 -3 0.61 0.99
 12 9 3 1.25 1.45
 13 -9 3 27.9 3.11
 13 9 -3 28.45 3.36
 13 9 -3 23.7 3.52
 13 9 -3 18.95 3.1
 13 -9 -3 25.73 3.14
 13 9 3 22.45 3.45
 13 9 3 28.57 3.56
 13 9 3 31.83 3.34
 -13 9 -3 25.91 3.13
 14 9 -3 4.65 2.11
 14 9 -3 6.25 2.23
 14 9 -3 7.69 2.46
 14 9 3 2.99 1.85
 14 9 3 7.2 2.37
 14 -9 -3 2.43 1.65
 -14 9 -3 3.87 1.7
 0 10 3 1.36 0.64
 0 10 -3 2.26 0.63
 0 -10 -3 3.15 0.77
 0 -10 3 2.53 0.63
 0 10 -3 1.68 0.54
 0 10 3 1.62 0.67
 0 10 3 2.15 0.71
 0 -10 3 2.78 0.67
 0 10 -3 1.84 0.62
 0 -10 -3 2.65 0.7
 -1 -10 -3 5.77 1.02
 1 -10 3 5.81 0.9
 1 10 -3 6.15 0.96
 -1 -10 -3 4.96 0.91
 1 -10 3 5.26 0.87
 -1 10 3 3.53 0.84
 1 10 -3 6.43 0.87
 -1 10 3 4.69 0.9
 -1 10 3 6.85 1.11
 1 10 -3 3.63 0.78
 1 -10 -3 5.58 0.99
 1 10 3 7.13 1.08
 -1 -10 3 6.31 0.94
 -1 -10 3 5.51 0.93
 1 -10 -3 4.92 0.89
 1 10 3 6.36 1.04
 1 10 3 5.99 1.07
 -1 10 -3 4.58 0.84
 -1 10 -3 5.53 0.9
 -1 10 -3 5.87 0.91
 -2 10 3 12.6 1.29
 2 10 -3 14.62 1.36
 -2 10 3 10.3 1.36
 2 10 -3 13.28 1.26
 -2 10 3 16.85 1.53
 2 -10 3 12.34 1.19
 -2 -10 -3 11.77 1.35
 -2 -10 -3 13.49 1.37
 2 -10 3 13.7 1.29
 -2 10 -3 16.23 1.35
 -2 10 -3 12.26 1.25
 2 10 3 13.95 1.47
 -2 10 -3 13.74 1.22
 -2 -10 3 12.84 1.28
 2 10 3 14.87 1.51
 2 -10 -3 16.08 1.41
 2 -10 -3 15.79 1.44
 -2 -10 3 13.18 1.23
 3 -10 3 31.6 2.06
 -3 -10 -3 28.02 2.16
 -3 10 3 33.56 2.24
 3 -10 3 31.21 2.05
 3 10 -3 30.63 2.17
 -3 10 3 29.97 2.1
 3 -10 3 31.45 2.01
 3 -10 3 30.8 2.02
 3 10 -3 30.89 2.15
 3 -10 -3 32.02 2.17
 -3 -10 3 31.49 2.09
 3 -10 -3 28.77 2.1
 3 10 3 30.59 2.34
 -3 10 -3 33.68 2.16
 -3 10 -3 33.84 2.19
 3 10 3 29.99 2.26
 3 10 3 29.11 2.18
 -4 -10 -3 22.78 1.93
 4 -10 3 26.69 1.84
 4 -10 3 24.45 1.88
 4 10 -3 25.7 2
 4 -10 3 23.62 1.8
 -4 10 3 27.66 1.98
 4 -10 3 25.98 1.88
 4 -10 -3 21.34 1.85
 4 -10 -3 20.5 1.88
 4 -10 -3 24.88 1.97
 -4 10 -3 24.41 1.86
 4 10 3 26.99 2.16
 4 10 3 23.39 2.11
 -4 -10 3 23.49 1.87
 4 10 3 20.13 2
 5 -10 3 24.3 1.93
 -5 10 3 26.77 2.08
 5 10 -3 28.03 2.12
 5 -10 3 22 1.92
 -5 -10 -3 21.85 1.99
 5 10 3 25.85 2.22
 5 -10 -3 21.63 1.98
 5 -10 -3 25.62 1.98
 -5 10 -3 26.54 2.06
 5 -10 -3 24.76 2.03
 5 10 3 27.4 2.23
 5 10 3 24.54 2.2
 5 -10 -3 26.22 2.13
 6 -10 3 -0.27 0.61
 -6 -10 -3 -0.06 0.67
 6 10 -3 -0.46 0.54
 6 -10 3 0.33 0.62
 -6 10 3 0.91 0.74
 6 10 3 0.65 0.73
 -6 10 -3 0.27 0.5
 6 -10 -3 0.08 0.54
 6 10 3 -0.55 0.52
 6 -10 -3 0.15 0.65
 6 10 3 0.74 0.68
 6 -10 -3 0.95 0.74
 6 -10 -3 0.19 0.72
 7 -10 3 14.79 1.68
 -7 -10 -3 20.67 2.01
 -7 10 3 19.15 1.84
 7 10 -3 23.04 2.13
 7 -10 3 20.92 2.06
 7 10 -3 17.93 1.95
 -7 10 -3 18.17 1.86
 7 -10 -3 19.84 1.93
 7 10 3 16.87 1.9
 7 -10 -3 20.52 2
 7 -10 -3 18.79 2.02
 7 10 3 21.82 2.17
 7 10 3 23.37 2.23
 7 -10 -3 16.42 1.86
 -8 10 3 5.1 1.2
 8 10 -3 2.14 1.02
 -8 -10 -3 3.77 1.2
 8 10 -3 3.34 1.2
 8 10 -3 5.55 1.33
 8 -10 3 2.47 0.93
 8 10 3 1.73 1.08
 8 10 3 1.69 0.88
 -8 10 -3 3.38 1.09
 8 10 3 2.81 1.16
 8 -10 -3 3.34 1.17
 8 -10 -3 3.05 1.08
 8 -10 -3 2.77 1.17
 8 -10 -3 2.92 1.04
 -9 10 3 11.16 1.75
 9 -10 3 9.88 1.66
 9 10 -3 12.62 2.04
 9 10 -3 11.18 1.94
 9 10 -3 9.09 1.78
 9 10 3 10.09 1.86
 9 -10 -3 8.29 1.63
 9 -10 -3 7.43 1.6
 9 10 3 10.09 1.92
 9 10 3 7.89 1.74
 -9 10 -3 8.36 1.53
 10 10 -3 1.41 1.15
 10 -10 3 0.49 0.87
 10 10 -3 0 0.95
 10 10 -3 0.5 0.98
 -10 10 3 0.71 0.93
 10 10 3 0.43 0.94
 10 10 3 0.25 0.94
 10 -10 -3 0.1 0.9
 10 -10 -3 0.9 0.97
 10 10 3 -0.68 0.9
 -10 10 -3 0.47 0.92
 -11 10 3 4.29 1.38
 11 10 -3 5.71 1.74
 11 10 -3 3.67 1.45
 11 -10 3 2.73 1.24
 11 10 -3 3.03 1.42
 11 -10 -3 5.47 1.61
 -11 10 -3 4.54 1.45
 11 -10 -3 6.32 1.57
 11 10 3 2.24 1.5
 11 10 3 4.25 1.46
 11 10 3 4.36 1.55
 12 -10 3 1.58 1.4
 12 10 -3 -0.13 1.2
 12 10 -3 3.72 1.82
 12 10 -3 0.63 1.34
 12 -10 -3 -0.63 1.24
 12 10 3 0.9 1.44
 -12 10 -3 1.4 1.14
 12 10 3 -0.42 1.18
 12 10 3 -2.73 1.27
 13 10 -3 1.56 1.51
 13 -10 3 0.18 1.27
 13 10 -3 1.4 1.51
 13 10 -3 0.8 1.44
 -13 10 -3 -0.53 0.99
 13 10 3 -0.75 1.23
 13 10 3 -0.22 1.52
 13 10 3 0.68 1.62
 13 -10 -3 -0.71 1.15
 14 10 -3 0.19 1.81
 14 -10 3 5.28 2.08
 14 10 3 2.9 1.9
 14 10 3 6.98 2.52
 14 10 3 3.95 2.15
 14 -10 -3 3.56 1.77
 -14 10 -3 3.29 1.73
 0 -11 3 0.32 0.5
 0 -11 -3 -0.1 0.48
 0 11 3 -0.51 0.44
 0 11 3 -0.13 0.48
 0 -11 3 -0.3 0.44
 0 11 -3 -0.32 0.3
 0 -11 -3 0.49 0.52
 0 11 -3 0.3 0.33
 0 11 3 0.03 0.48
 0 11 -3 0.25 0.43
 1 11 -3 24.05 1.79
 -1 -11 -3 25.06 1.84
 -1 11 3 26.15 1.85
 1 -11 3 24.4 1.71
 1 11 -3 23.97 1.74
 -1 11 3 24.08 1.87
 -1 -11 -3 23.05 1.83
 1 11 -3 19.24 1.66
 -1 11 3 23.29 1.89
 1 -11 3 18.98 1.6
 1 11 3 23.53 1.84
 1 11 3 21.39 1.82
 -1 11 -3 24.29 1.74
 1 -11 -3 20.43 1.77
 -1 11 -3 23.08 1.77
 -1 -11 3 21.27 1.65
 1 11 3 19.4 1.88
 -1 11 -3 22.42 1.68
 1 -11 -3 19.27 1.76
 -1 -11 3 23.73 1.72
 -2 11 3 48.61 3.07
 -2 11 3 53.98 3.06
 -2 -11 -3 47.56 2.92
 2 -11 3 48.12 2.79
 2 11 -3 54.64 3.02
 2 11 -3 48.98 2.98
 -2 -11 -3 43.83 2.91
 -2 11 3 48.94 2.92
 2 -11 3 52.02 2.87
 2 11 3 49.04 3.03
 -2 -11 3 50.37 2.81
 -2 11 -3 48.34 2.83
 -2 11 -3 51.39 2.89
 2 -11 -3 53.88 3.02
 2 -11 -3 52.63 2.98
 2 11 3 52.35 3.19
 -2 -11 3 50.03 2.88
 -2 11 -3 51.68 2.93
 2 11 3 53.6 3.04
 3 -11 3 91.59 4.41
 -3 11 3 85.99 4.63
 3 -11 3 92.38 4.46
 3 11 -3 93.36 4.69
 -3 11 3 87.25 4.53
 3 -11 3 89.52 4.46
 -3 -11 -3 95.35 4.72
 3 11 3 93.99 4.88
 -3 11 -3 90.41 4.5
 3 11 3 94.8 4.83
 3 -11 -3 95.27 4.64
 -3 11 -3 90.88 4.57
 3 11 3 83.92 4.72
 3 -11 -3 89.03 4.59
 -3 -11 3 91.1 4.45
 4 -11 3 94.8 4.4
 4 11 -3 77.68 4.41
 -4 11 3 83.64 4.43
 4 -11 3 83.91 4.29
 -4 -11 -3 82.35 4.4
 4 -11 -3 87.99 4.45
 4 11 3 84.45 4.69
 -4 11 -3 83.78 4.37
 4 -11 -3 84.05 4.43
 4 -11 -3 82.7 4.41
 4 11 3 79.91 4.58
 -4 11 -3 86.56 4.4
 4 11 3 83.35 4.54
 -5 -11 -3 17.71 1.84
 -5 11 3 16.32 1.78
 5 -11 3 17.73 1.68
 5 11 -3 19.72 1.86
 5 -11 3 17.23 1.7
 5 -11 -3 16.21 1.73
 5 -11 -3 16.05 1.68
 5 -11 -3 16.21 1.79
 5 -11 -3 17.24 1.73
 -5 11 -3 23.89 1.88
 5 11 3 18.26 1.87
 5 11 3 21.3 1.91
 5 11 3 18.17 1.91
 -6 -11 -3 142.14 6.46
 6 11 -3 124.85 6.31
 -6 11 3 136.83 6.33
 6 -11 3 124.35 6.09
 6 -11 3 131.52 6.19
 6 11 3 123.03 6.35
 6 -11 -3 125.84 6.24
 6 11 3 126.47 6.51
 -6 11 -3 115.14 6.09
 6 -11 -3 123.5 6.18
 6 -11 -3 122.99 6.25
 6 -11 -3 116.83 6.01
 6 11 3 120.64 6.49
 7 11 -3 1.51 0.86
 7 -11 3 0.28 0.63
 -7 -11 -3 0.37 0.95
 7 11 -3 -0.47 0.69
 -7 11 3 -0.07 0.59
 7 -11 -3 0.94 0.78
 7 -11 -3 0.19 0.79
 -7 11 -3 0.35 0.64
 7 11 3 0.74 0.85
 7 -11 -3 0.08 0.64
 7 11 3 1.23 0.87
 7 -11 -3 0.52 0.91
 7 11 3 1.11 0.75
 8 -11 3 115.41 6.44
 -8 11 3 132.11 6.72
 8 11 -3 136.5 7.08
 8 11 -3 132.51 6.94
 8 11 -3 142.62 7.09
 -8 11 -3 134.09 6.7
 8 -11 -3 137.78 6.77
 8 11 3 132.44 6.95
 8 11 3 119.29 6.96
 8 11 3 138.76 7.18
 8 -11 -3 128.67 6.74
 9 11 -3 9.74 1.97
 -9 11 3 9.18 1.7
 9 -11 3 8.51 1.54
 9 11 -3 11.95 1.94
 9 11 -3 12.48 2.06
 9 11 3 13.24 2.18
 9 11 3 9.98 1.9
 9 11 3 15.74 2.09
 9 -11 -3 9.85 1.75
 9 -11 -3 12.22 1.94
 -9 11 -3 11.69 1.88
 -10 11 3 27.62 2.66
 10 11 -3 26.52 2.79
 10 -11 3 29.09 2.67
 10 11 -3 26.31 2.83
 10 11 -3 29.99 2.96
 10 11 3 30.62 3.14
 10 11 3 29.84 2.88
 -10 11 -3 28.43 2.72
 10 -11 -3 28.17 2.84
 10 -11 -3 27.63 2.72
 10 11 3 22.42 2.83
 11 11 -3 15.41 2.52
 11 11 -3 13.87 2.48
 11 -11 3 11.87 2.1
 -11 11 3 17.01 2.22
 11 11 -3 12.95 2.53
 11 -11 -3 13.08 2.21
 11 -11 -3 12 2.26
 11 11 3 17.27 2.72
 -11 11 -3 17.12 2.25
 11 11 3 9.49 2.17
 11 11 3 14.51 2.58
 12 11 -3 2.41 1.58
 12 11 -3 -0.03 1.32
 12 11 -3 0.83 1.42
 12 -11 3 0.95 1.35
 -12 11 -3 -0.12 1.1
 12 -11 -3 0.71 1.29
 12 11 3 1.09 1.5
 12 11 3 0.37 1.28
 12 11 3 2.19 1.49
 13 -11 3 21.85 2.81
 13 11 -3 20.42 3.32
 13 11 -3 19.26 3.23
 13 11 -3 15.97 2.93
 13 11 3 20.92 3.43
 -13 11 -3 20.16 2.75
 13 11 3 19.14 3.21
 13 11 3 17.18 3.07
 13 -11 -3 26.69 3.22
 14 -11 3 1.25 1.65
 14 11 3 -0.4 1.61
 -14 11 -3 -1.07 1.53
 14 11 3 0.64 1.74
 0 -12 3 31.37 2.11
 0 -12 -3 31.51 2.25
 0 12 3 25.66 2.19
 0 -12 -3 28.06 2.11
 0 12 3 32.37 2.27
 0 12 -3 31.98 2.17
 0 12 3 29.61 2.21
 0 12 -3 28.56 2.02
 0 12 -3 32.59 2.14
 -1 -12 -3 19.12 1.71
 -1 12 3 20.02 1.85
 -1 -12 -3 20.44 1.78
 1 12 -3 16.13 1.57
 1 -12 3 18.81 1.6
 1 12 -3 18.65 1.73
 -1 12 3 17.42 1.72
 1 12 -3 15.93 1.5
 -1 12 3 20.42 1.7
 -1 12 -3 22.17 1.77
 -1 12 -3 17.58 1.57
 1 12 3 17.08 1.7
 1 12 3 20.71 1.8
 -1 12 -3 20.48 1.6
 1 -12 -3 20.64 1.75
 1 -12 -3 19.9 1.78
 1 12 3 18.23 1.86
 -1 -12 3 18.2 1.61
 2 -12 3 10.08 1.22
 -2 12 3 8.46 1.36
 -2 12 3 9.7 1.24
 2 12 -3 9.55 1.26
 -2 12 3 10.29 1.48
 -2 -12 -3 10 1.3
 -2 -12 -3 7.22 1.22
 -2 12 -3 9.63 1.25
 2 12 3 8.85 1.41
 -2 -12 3 7.26 1.14
 -2 12 -3 10.04 1.2
 2 12 3 8.41 1.49
 2 -12 -3 8.98 1.34
 2 12 3 8.53 1.35
 2 -12 -3 8.1 1.25
 3 -12 3 39.74 2.44
 -3 -12 -3 35.15 2.55
 -3 12 3 32.28 2.39
 3 12 -3 33.34 2.41
 3 -12 3 38.87 2.41
 -3 -12 -3 34.73 2.49
 -3 12 3 34.46 2.54
 -3 12 3 38.65 2.63
 -3 12 -3 32.97 2.32
 -3 12 -3 33.8 2.36
 -3 -12 3 36.59 2.45
 3 -12 -3 44.44 2.66
 3 -12 -3 36.58 2.5
 3 12 3 29.21 2.42
 3 12 3 31.42 2.56
 3 12 3 36.42 2.64
 4 -12 3 3.77 0.95
 4 12 -3 4.93 1.06
 4 -12 3 5.17 1.05
 -4 12 3 6.07 1.15
 -4 12 3 5.47 1.1
 -4 -12 -3 5.52 1.21
 4 -12 -3 4.63 1.11
 4 12 3 2.92 0.92
 -4 12 -3 7.15 1.14
 4 12 3 4.89 1.12
 4 -12 -3 7.87 1.31
 4 12 3 6.43 1.27
 4 -12 -3 7.35 1.25
 -4 12 -3 7.13 1.2
 -5 -12 -3 11.87 1.58
 5 12 -3 13.06 1.59
 -5 12 3 12.04 1.46
 5 -12 3 11.91 1.43
 5 12 3 7.87 1.48
 5 12 3 10.37 1.67
 5 12 3 13.4 1.7
 5 -12 -3 14.65 1.67
 5 -12 -3 14.38 1.63
 5 -12 -3 11.9 1.51
 5 -12 -3 11.62 1.55
 -5 12 -3 12 1.4
 6 12 -3 -0.86 0.52
 6 -12 3 0.26 0.64
 -6 -12 -3 -0.65 0.72
 -6 12 3 -0.1 0.6
 6 -12 -3 0.17 0.73
 6 -12 -3 0.29 0.64
 6 12 3 0.62 0.77
 6 -12 -3 -0.07 0.77
 6 12 3 0.48 0.66
 6 12 3 -0.27 0.66
 -6 12 -3 0.28 0.65
 6 -12 -3 0 0.73
 7 12 -3 16.15 1.9
 7 12 -3 17.68 2.05
 -7 12 3 15.75 1.83
 7 -12 3 16.77 1.82
 7 12 3 13.59 1.88
 7 12 3 15.63 1.93
 -7 12 -3 15.75 1.78
 7 -12 -3 18.23 1.91
 7 -12 -3 17.26 1.94
 7 12 3 15.7 1.98
 8 12 -3 2.53 1.12
 8 -12 3 1.37 0.85
 -8 12 3 0.82 0.9
 8 12 -3 0.43 0.87
 8 12 3 -0.43 0.89
 8 12 3 1.06 0.98
 8 -12 -3 4.01 1.22
 -8 12 -3 0.53 0.8
 8 12 3 0.57 0.87
 8 -12 -3 0.19 0.85
 9 12 -3 6.53 1.65
 -9 12 3 9.28 1.66
 9 12 -3 10.45 2.03
 9 12 -3 7.63 1.73
 9 -12 3 7.47 1.59
 9 12 3 11.54 2.08
 9 -12 -3 7.96 1.69
 9 12 3 7.95 1.91
 -9 12 -3 14.23 1.85
 9 -12 -3 7.74 1.63
 9 12 3 10.78 1.96
 10 12 -3 1.07 1.25
 10 -12 3 1.02 1.02
 10 12 -3 3.47 1.36
 10 12 -3 3.28 1.41
 -10 12 3 2.43 1.29
 10 -12 -3 3.87 1.4
 10 12 3 1.08 1.16
 10 -12 -3 1.49 1.06
 -10 12 -3 2.79 1.1
 10 12 3 2.35 1.23
 10 12 3 1.95 1.29
 11 -12 3 2.31 1.11
 11 12 -3 1.8 1.48
 11 12 -3 3.5 1.68
 -11 12 3 3.91 1.31
 11 12 -3 2.29 1.53
 11 12 3 0.27 1.22
 11 12 3 1.72 1.32
 11 12 3 3 1.59
 11 -12 -3 1.72 1.3
 -11 12 -3 1.45 1.3
 12 -12 3 3.39 1.51
 12 12 -3 1.58 1.48
 12 12 -3 4.55 1.75
 12 12 -3 1.84 1.39
 12 12 3 3.45 1.98
 12 -12 -3 0.55 1.43
 -12 12 -3 2.8 1.45
 12 12 3 7.19 2
 12 12 3 4.12 1.75
 13 12 -3 0.67 1.78
 13 12 -3 -1.18 1.25
 13 -12 3 1.2 1.5
 13 12 -3 -0.57 1.39
 13 12 3 -0.56 1.55
 13 12 3 -0.23 1.51
 13 12 3 -0.67 1.42
 13 -12 -3 1.11 1.56
 -13 12 -3 -1.79 1.09
 14 -12 3 0.53 1.69
 -14 12 -3 2.03 1.56
 0 13 3 -0.37 0.49
 0 -13 -3 -0.19 0.58
 0 13 3 0.37 0.65
 0 13 -3 -0.63 0.45
 0 -13 3 0.23 0.6
 0 -13 -3 0.09 0.59
 0 13 3 -0.17 0.64
 -1 -13 -3 46.13 2.9
 -1 -13 -3 45.21 2.89
 -1 13 3 48.78 3.05
 1 13 -3 38.28 2.67
 1 -13 3 40.21 2.64
 -1 13 3 43.99 2.85
 -1 13 3 48.82 3.04
 1 13 3 43.31 2.97
 -1 -13 3 43.1 2.69
 1 13 3 42.51 2.89
 1 -13 -3 47.68 2.9
 1 -13 -3 46 2.91
 1 13 3 46.11 2.95
 -1 13 -3 42.5 2.72
 2 -13 3 39.87 2.56
 -2 -13 -3 39.91 2.77
 -2 13 3 39.61 2.71
 -2 13 3 36.72 2.66
 -2 -13 -3 42.14 2.76
 2 13 -3 43.43 2.73
 2 13 -3 37.53 2.55
 -2 13 3 31.24 2.5
 -2 13 -3 48.46 2.78
 2 -13 -3 41.27 2.73
 2 13 3 39.2 2.76
 2 13 3 36.86 2.71
 2 -13 -3 44.07 2.76
 2 13 3 37.78 2.77
 -2 13 -3 42.27 2.63
 -2 -13 3 39.06 2.58
 -3 13 3 42.28 2.86
 -3 -13 -3 33.85 2.68
 -3 13 3 38.87 2.78
 -3 13 3 44.01 2.85
 3 13 -3 40.9 2.76
 3 -13 3 44.89 2.71
 -3 -13 -3 37.01 2.67
 -3 13 -3 38.39 2.63
 -3 13 -3 49.22 2.87
 -3 -13 3 38.43 2.61
 3 -13 -3 41.1 2.77
 3 13 3 41.51 2.94
 3 13 3 36.92 2.74
 3 -13 -3 42.49 2.76
 4 13 -3 63.43 4
 -4 13 3 71.61 4.07
 4 -13 3 70.31 3.93
 -4 13 3 72.43 4.09
 -4 -13 -3 67.5 4.11
 4 -13 -3 73.87 4.09
 4 -13 -3 76.21 4.11
 -4 13 -3 73.27 4.05
 4 -13 -3 70.53 4
 4 13 3 73.5 4.22
 4 13 3 71.17 4.25
 -4 13 -3 70.63 3.96
 4 13 3 66.77 4.2
 5 13 -3 40.35 2.95
 -5 -13 -3 38.53 2.88
 -5 13 3 38.94 2.82
 5 -13 3 40.12 2.76
 5 -13 -3 41.48 2.93
 5 13 3 42.3 3.15
 5 13 3 35.96 2.96
 5 -13 -3 44.73 2.93
 -5 13 -3 38.36 2.78
 5 -13 -3 39.77 2.92
 5 13 3 36.9 2.87
 5 -13 -3 42.82 2.89
 -6 13 3 74.15 4.45
 6 13 -3 83.58 4.72
 6 -13 3 81.95 4.41
 -6 13 -3 72.38 4.36
 6 -13 -3 76.82 4.48
 6 -13 -3 74.75 4.44
 6 13 3 87.24 4.97
 6 13 3 84.02 4.89
 6 13 3 72.57 4.57
 7 -13 3 2.62 0.98
 7 13 -3 2.51 1.1
 -7 13 3 2.72 1.06
 7 13 3 1.08 0.77
 7 13 3 2.73 1.08
 7 13 3 4.34 1.29
 7 -13 -3 3.49 1.19
 7 -13 -3 3.6 1.1
 -7 13 -3 3.01 1
 8 -13 3 46.55 3.26
 8 13 -3 48.69 3.63
 -8 13 3 53.06 3.56
 8 13 -3 46.28 3.67
 -8 13 -3 45.99 3.37
 8 -13 -3 45.54 3.5
 8 13 3 48.43 3.7
 8 13 3 44.7 3.65
 8 -13 -3 51.27 3.58
 8 13 3 53.6 3.88
 9 13 -3 2.49 1.37
 -9 13 3 1.33 0.97
 9 -13 3 3.61 1.21
 9 13 -3 3.62 1.34
 9 13 -3 1.6 1.17
 9 13 3 2.35 1.28
 9 13 3 3.17 1.25
 9 -13 -3 4.13 1.35
 -9 13 -3 2.07 1.02
 9 13 3 1.31 1.14
 9 -13 -3 1.87 1.04
 -10 13 3 30.68 2.85
 10 13 -3 19.63 2.97
 10 13 -3 22.89 2.75
 10 -13 3 24.72 2.63
 10 13 -3 22.94 2.82
 10 13 3 27.29 3.06
 -10 13 -3 26.81 2.74
 10 -13 -3 26.53 2.74
 10 13 3 22.05 2.84
 10 13 3 27.78 2.98
 -11 13 3 11.9 2.07
 11 13 -3 9.63 2.23
 11 13 -3 7.63 2.18
 11 13 -3 9.12 2.11
 11 -13 3 5.84 1.73
 11 -13 -3 9.13 2
 11 13 3 10.39 2.3
 -11 13 -3 12.06 2.19
 11 13 3 6.4 2
 11 13 3 8.21 2.07
 12 -13 3 2.61 1.39
 12 13 -3 2.39 1.55
 12 13 -3 2.93 1.75
 12 13 -3 2.18 1.74
 12 13 3 1.17 1.48
 12 -13 -3 2.53 1.55
 12 13 3 0.74 1.29
 -12 13 -3 1.26 1.33
 12 13 3 4.78 1.96
 13 -13 3 20.36 2.73
 13 13 -3 15.02 3.04
 13 13 3 15.69 3.13
 13 13 3 17.36 3.28
 -13 13 -3 16.1 2.83
 13 13 3 15.49 3
 13 -13 -3 19.01 3.17
 0 14 3 1.16 0.71
 0 14 3 1.18 0.74
 0 -14 -3 0.48 0.77
 0 -14 3 0.61 0.67
 0 14 -3 0.25 0.53
 0 -14 -3 0 0.56
 0 14 3 1.02 0.71
 0 14 -3 0.38 0.48
 -1 -14 -3 12.1 1.42
 -1 14 3 14.15 1.52
 -1 14 3 10.89 1.62
 1 -14 3 12.3 1.43
 -1 -14 -3 13.31 1.64
 -1 14 3 11.87 1.46
 1 14 -3 13.96 1.52
 1 14 -3 9.36 1.43
 1 -14 -3 10.7 1.55
 1 14 3 10.05 1.54
 1 -14 -3 10.29 1.53
 -1 -14 3 13.23 1.5
 -1 14 -3 14.14 1.45
 1 14 3 11.11 1.53
 -1 14 -3 11.43 1.33
 1 14 3 9.57 1.5
 2 -14 3 1.32 0.72
 2 14 -3 1.64 0.74
 -2 -14 -3 2.54 0.96
 -2 -14 -3 1.02 0.74
 -2 14 3 1.34 0.73
 2 14 -3 0.93 0.62
 -2 14 3 0.93 0.73
 -2 14 3 1.24 0.73
 2 14 3 1.55 0.77
 2 -14 -3 1.4 0.71
 -2 14 -3 1.08 0.65
 2 14 3 0.15 0.57
 2 14 3 1.06 0.76
 -2 -14 3 1.77 0.78
 -2 14 -3 1.36 0.74
 2 -14 -3 1.05 0.88
 -3 -14 -3 25.09 2.25
 -3 -14 -3 24.6 2.12
 3 -14 3 21.69 1.91
 -3 14 3 21.34 2.01
 -3 14 3 21.21 2.05
 -3 14 3 24.1 2.14
 3 14 -3 25.54 2.12
 -3 -14 3 21.67 1.97
 3 -14 -3 22.67 2.1
 3 14 3 19.45 2.1
 3 14 3 26.06 2.31
 3 14 3 28.14 2.21
 3 -14 -3 22.73 1.97
 -3 14 -3 26.38 2.09
 -3 14 -3 23.65 2.06
 -4 14 3 2.11 0.9
 4 14 -3 3.7 1.05
 -4 -14 -3 3.97 1.11
 -4 14 3 2.47 0.96
 4 -14 3 3.14 0.93
 4 14 3 3.95 1.17
 -4 -14 3 2.69 0.92
 4 -14 -3 3.97 1.03
 4 14 3 1.15 0.85
 4 14 3 2.16 0.9
 4 -14 -3 2.55 1.07
 -4 14 -3 3.18 0.96
 -4 14 -3 2.02 0.87
 5 14 -3 19.42 2.04
 -5 14 3 23.63 2.16
 5 -14 3 20.89 1.98
 5 -14 -3 21.03 2.01
 5 14 3 25 2.26
 5 14 3 24.35 2.36
 5 -14 -3 17.75 2.01
 5 14 3 29.03 2.54
 -5 14 -3 22.14 2.07
 6 14 -3 -1.2 0.63
 -6 14 3 -1.74 0.5
 6 -14 3 0.04 0.76
 -6 14 -3 0.04 0.76
 6 -14 -3 -0.31 0.61
 6 -14 -3 -0.39 0.81
 6 14 3 0.62 0.98
 6 14 3 0.54 0.84
 6 14 3 -0.46 0.82
 7 14 -3 36.77 3
 7 -14 3 37.35 2.79
 -7 14 3 36.78 2.95
 7 14 -3 32.4 2.93
 7 14 3 36.36 3.15
 7 -14 -3 34.85 2.84
 7 14 3 33.48 3.1
 7 14 3 40.04 3.17
 7 -14 -3 35.3 2.91
 -7 14 -3 36.78 2.88
 8 14 -3 4.74 1.46
 8 -14 3 3.47 1.15
 8 14 -3 5.85 1.6
 -8 14 3 4.28 1.24
 8 14 3 4.37 1.49
 8 14 3 1.95 1.28
 8 -14 -3 3.09 1.11
 8 -14 -3 4.85 1.44
 8 14 3 4.82 1.46
 -8 14 -3 6.46 1.49
 -9 14 3 28.72 2.72
 9 14 -3 26.45 2.83
 9 14 -3 29.7 3.1
 9 -14 3 27.09 2.64
 9 14 -3 30.57 3.14
 9 14 3 26.39 2.94
 -9 14 -3 26.37 2.61
 9 -14 -3 24.67 2.67
 9 14 3 26.9 3
 9 14 3 29.06 3.01
 -10 14 3 4.36 1.4
 10 -14 3 7.01 1.59
 10 14 -3 4.04 1.83
 10 14 -3 3.87 1.73
 10 14 -3 5.31 1.76
 -10 14 -3 2.9 1.33
 10 14 3 5.72 1.87
 10 14 3 4.01 1.75
 10 -14 -3 3.35 1.42
 10 14 3 4.93 1.8
 11 14 -3 3.1 1.72
 11 14 -3 4.21 1.68
 -11 14 3 2.69 1.35
 11 14 -3 2.19 1.47
 11 -14 3 5.18 1.89
 -11 14 -3 2.12 1.35
 11 -14 -3 4.35 1.77
 11 14 3 2.52 1.69
 11 14 3 4.26 1.76
 11 14 3 2.94 1.59
 12 14 -3 3.69 1.81
 12 14 -3 4.35 1.85
 12 -14 3 5.68 1.75
 12 14 -3 3.76 1.88
 12 14 3 1.14 1.66
 12 14 3 3.77 2.01
 -12 14 -3 1.89 1.35
 12 -14 -3 3.7 1.69
 12 14 3 3 1.77
 -13 14 -3 0.3 1.52
 13 14 3 2.66 2.04
 0 -15 3 0.4 0.69
 0 15 3 0.04 0.57
 0 15 -3 0.09 0.55
 0 15 3 0.12 0.64
 0 15 -3 0.08 0.59
 0 -15 -3 0.31 0.59
 0 15 3 -0.18 0.62
 1 15 -3 29.88 2.29
 1 15 -3 34 2.43
 -1 15 3 28.52 2.42
 -1 15 3 25.42 2.37
 -1 15 3 28.76 2.37
 -1 -15 -3 29.33 2.32
 1 -15 3 27.23 2.24
 -1 -15 3 30.2 2.33
 -1 15 -3 29.79 2.26
 1 15 3 29.01 2.35
 1 15 3 28.8 2.5
 1 15 3 23.22 2.26
 -1 15 -3 30.87 2.35
 1 -15 -3 30.02 2.33
 -2 15 3 35.2 2.59
 -2 -15 -3 30.95 2.55
 2 -15 3 35.95 2.5
 2 15 -3 34.35 2.62
 2 15 -3 37.38 2.73
 -2 15 3 36.86 2.77
 -2 15 3 29 2.55
 2 -15 -3 29.83 2.51
 2 15 3 38.04 2.77
 -2 15 -3 34.19 2.52
 -2 -15 3 37.98 2.57
 2 15 3 40.81 2.95
 -2 15 -3 36.72 2.6
 2 15 3 33.89 2.69
 -3 15 3 12.01 1.79
 -3 15 3 14.98 1.69
 3 15 -3 13.52 1.63
 3 -15 3 11.63 1.51
 3 15 -3 9.76 1.62
 -3 15 3 13.65 1.68
 -3 -15 -3 11.3 1.72
 3 15 3 14.43 1.67
 3 15 3 14.22 1.74
 3 15 3 13.89 1.8
 -3 15 -3 13.93 1.6
 -3 15 -3 10.8 1.45
 -3 -15 3 12.86 1.59
 3 -15 -3 12.43 1.5
 -4 15 3 32.74 2.74
 4 15 -3 39.55 2.89
 4 -15 3 35.18 2.58
 -4 15 3 34.5 2.7
 -4 -15 -3 35.83 2.75
 -4 -15 3 36.96 2.69
 4 15 3 31.52 2.8
 4 15 3 35.51 2.94
 4 -15 -3 37.61 2.78
 4 -15 -3 38.26 2.76
 -4 15 -3 37.85 2.74
 -4 15 -3 39.33 2.85
 5 15 -3 0.74 0.67
 5 -15 3 0.5 0.7
 -5 15 3 0.56 0.73
 5 15 3 0.65 0.82
 5 15 3 1.08 0.93
 5 15 3 -1.08 0.76
 -5 15 -3 0.74 0.67
 -5 -15 3 0.63 0.75
 5 -15 -3 0.3 0.74
 5 -15 -3 -0.64 0.61
 -6 15 3 42.3 3.25
 6 -15 3 45.99 3.12
 6 15 -3 39.73 3.34
 6 -15 -3 44.87 3.26
 6 -15 -3 47.23 3.36
 6 15 3 39.54 3.42
 6 15 3 54.56 3.72
 -6 15 -3 47.14 3.3
 6 15 3 46.54 3.44
 7 15 -3 1.18 1.06
 7 -15 3 0.74 0.81
 7 15 -3 -0.7 0.69
 -7 15 3 0.56 0.79
 7 15 3 0.52 0.96
 -7 15 -3 -0.08 0.79
 7 -15 -3 -1.23 0.67
 7 15 3 1.12 1.06
 7 15 3 -0.55 0.85
 7 -15 -3 0.18 0.73
 -8 15 3 66.44 4.57
 8 15 -3 67.87 4.88
 8 15 -3 67.48 4.82
 8 15 -3 79.72 4.98
 8 -15 3 68.61 4.53
 -8 15 -3 83.8 4.87
 8 15 3 80.27 5.28
 8 15 3 72.8 5
 8 15 3 81.86 5.23
 8 -15 -3 80.86 4.91
 9 15 -3 3.91 1.67
 9 15 -3 4.39 1.63
 -9 15 3 4.21 1.54
 9 -15 3 4.77 1.4
 9 15 -3 2.8 1.35
 9 15 3 4.99 1.71
 -9 15 -3 5.31 1.53
 9 -15 -3 3.31 1.42
 9 15 3 4.18 1.68
 9 15 3 7.7 1.79
 10 -15 3 8.67 1.97
 10 15 -3 15.64 2.59
 10 15 -3 15.79 2.66
 10 15 -3 15.74 2.71
 -10 15 3 15.81 2.51
 10 15 3 17.42 2.78
 -10 15 -3 14.29 2.32
 10 -15 -3 12.91 2.33
 10 15 3 12.67 2.45
 10 15 3 17.7 2.95
 11 15 -3 8.05 2.26
 11 -15 3 9.63 1.92
 11 15 -3 3.27 1.65
 11 15 -3 7.19 1.94
 -11 15 -3 8.2 1.91
 11 15 3 8.6 2.19
 11 15 3 2.33 1.6
 11 15 3 6.26 2.02
 11 -15 -3 7.73 1.99
 12 15 -3 -0.22 1.52
 12 15 -3 1.49 1.62
 12 -15 -3 -0.55 1.34
 12 15 3 -0.4 1.67
 -12 15 -3 -0.79 1.33
 12 15 3 -0.89 1.74
 12 15 3 -0.23 1.52
 0 -16 -3 2.93 0.97
 0 -16 3 2.68 0.89
 0 16 -3 2.9 1.02
 0 16 3 4.56 1.2
 0 16 3 2.11 0.86
 0 16 3 4.05 1.09
 0 16 -3 6.48 1.28
 -1 16 3 7.46 1.42
 1 16 -3 9.33 1.5
 -1 -16 -3 7.62 1.38
 1 16 -3 5.97 1.28
 -1 16 3 7.64 1.53
 -1 16 3 5.93 1.25
 1 -16 3 8.17 1.37
 -1 -16 3 8.08 1.32
 1 16 3 6.04 1.37
 1 16 3 8.34 1.56
 -1 16 -3 7.34 1.4
 1 16 3 7.24 1.41
 1 -16 -3 8.32 1.48
 -1 16 -3 7.53 1.37
 2 16 -3 3.74 1.02
 2 -16 3 4.06 1.08
 -2 16 3 3.56 1.1
 -2 16 3 2.18 0.89
 -2 16 3 2.71 0.91
 2 16 -3 2.02 0.88
 -2 -16 -3 3.92 0.99
 -2 16 -3 0.9 0.68
 2 16 3 2.89 1.08
 2 -16 -3 3.5 1.04
 2 16 3 4.29 1.16
 2 16 3 4.04 1.21
 -2 16 -3 2.67 0.9
 -2 -16 3 4.23 1.07
 3 16 -3 17.68 1.91
 -3 16 3 17.83 1.94
 3 16 -3 19.71 2.03
 3 -16 3 20.01 1.91
 -3 16 3 19.97 2.1
 -3 16 3 20.79 2.12
 -3 -16 -3 21.72 2.09
 3 16 3 19.31 2.15
 3 16 3 22.91 2.17
 -3 16 -3 21.7 2.09
 3 -16 -3 21.5 2.06
 -3 16 -3 21.54 2.03
 -3 -16 3 20.61 1.93
 3 16 3 21.52 2.32
 -4 16 3 17.27 1.98
 4 -16 3 22.63 2.09
 -4 16 3 21.02 2.14
 -4 -16 -3 16.34 2
 4 16 -3 21.59 2.2
 4 16 3 20.66 2.13
 4 16 3 19.54 2.13
 -4 16 -3 19.17 2.03
 -4 -16 3 17.53 1.91
 4 16 3 22.07 2.4
 -4 16 -3 20.06 2.03
 4 -16 -3 21.44 2.05
 4 -16 -3 20.57 2.11
 5 16 -3 34.99 2.81
 -5 16 3 27.96 2.49
 -5 -16 -3 27.62 2.58
 5 -16 3 27.92 2.42
 -5 -16 3 27.31 2.47
 5 16 3 27.68 2.63
 5 -16 -3 27.92 2.51
 5 16 3 33.28 2.89
 5 16 3 28.28 2.69
 5 -16 -3 29.58 2.6
 -5 16 -3 31.28 2.61
 6 16 -3 0.17 0.75
 6 16 -3 -0.84 1
 -6 16 3 1.23 0.91
 6 -16 3 0.58 0.72
 -6 16 -3 0.32 0.82
 6 16 3 0.08 0.94
 6 -16 -3 0.74 0.99
 6 16 3 0.32 0.83
 6 16 3 0.52 1
 7 16 -3 57.91 4.22
 -7 16 3 52.01 3.88
 7 16 -3 51.78 4.05
 7 16 -3 58.18 4.11
 7 -16 3 59.37 3.9
 -7 16 -3 57.94 3.91
 7 -16 -3 52.74 3.84
 7 16 3 57.61 4.12
 7 16 3 49.27 3.99
 7 16 3 57.67 4.36
 8 16 -3 0.76 1.23
 8 -16 3 0.6 1.01
 8 16 -3 2.64 1.18
 -8 16 3 3.09 1.21
 8 16 -3 2.24 1.23
 8 -16 -3 0.28 1.07
 8 16 3 1.64 1.31
 8 16 3 1.79 1.21
 8 16 3 3.03 1.39
 -8 16 -3 1.88 1.06
 9 16 -3 24.39 3
 -9 16 3 30.7 3.08
 9 16 -3 34.19 3.33
 9 16 -3 33.61 3.36
 9 -16 3 31.95 2.91
 9 16 3 28.83 3.32
 9 16 3 35.38 3.46
 -9 16 -3 30.39 3.04
 9 -16 -3 30.12 2.99
 9 16 3 31.18 3.32
 10 16 -3 2.93 1.45
 10 16 -3 -1.64 1.09
 10 16 -3 -0.89 1.09
 -10 16 3 -0.69 1.12
 10 -16 -3 3.68 1.48
 10 16 3 0.88 1.62
 10 16 3 0.22 1.43
 10 16 3 1.65 1.38
 -10 16 -3 -0.01 1.24
 11 16 -3 5.85 2.05
 11 16 -3 5 1.87
 11 16 -3 2.84 1.8
 11 16 3 3.17 1.71
 -11 16 -3 0.7 1.38
 11 16 3 7.06 1.95
 11 16 3 3.89 1.77
 11 -16 -3 5.84 1.94
 -12 16 -3 5.66 2.03
 12 16 3 2.98 2.03
 12 -16 -3 8.42 2.35
 0 17 -3 0.33 0.67
 0 17 3 1.05 0.84
 0 17 3 -1.43 0.6
 0 -17 3 -0.39 0.64
 0 17 3 0.14 0.7
 0 17 -3 -0.59 0.44
 0 -17 -3 -0.14 0.6
 -1 17 3 17.35 2.01
 1 17 -3 16.15 1.81
 -1 17 3 15.83 1.8
 -1 -17 -3 15.76 1.9
 -1 17 3 14.87 1.96
 1 -17 3 17.93 1.82
 1 17 -3 16.83 1.85
 1 -17 -3 15.02 1.84
 -1 -17 3 15.49 1.73
 -1 17 -3 15.44 1.87
 1 17 3 16.21 1.96
 1 17 3 15.8 1.83
 -1 17 -3 15.96 1.84
 1 17 3 16.7 1.96
 2 17 -3 18.03 1.98
 -2 17 3 16.86 2
 -2 17 3 18.39 2.15
 -2 -17 -3 19.46 2
 2 -17 3 17.67 1.83
 -2 17 3 19.66 2
 2 17 -3 19.89 2.06
 2 -17 -3 17.35 1.93
 -2 -17 3 16.01 1.85
 2 17 3 18.46 2.08
 -2 17 -3 16.99 1.87
 2 17 3 18.55 2.07
 -2 17 -3 22.65 2.09
 2 17 3 17.06 1.96
 3 17 -3 13.42 1.75
 -3 17 3 10.59 1.73
 -3 17 3 11.43 1.81
 -3 -17 -3 8.56 1.62
 3 17 -3 12.07 1.64
 -3 17 3 14.29 2.09
 3 -17 3 13.32 1.6
 3 17 3 10.29 1.79
 3 17 3 9.5 1.76
 3 17 3 13.38 2.04
 -3 17 -3 8.27 1.52
 3 -17 -3 8.21 1.55
 -3 17 -3 11.19 1.78
 -3 -17 3 10 1.67
 4 17 -3 44.54 3.33
 -4 -17 -3 46.19 3.4
 -4 17 3 48.98 3.49
 4 17 -3 50.28 3.52
 -4 17 3 43.92 3.33
 4 -17 3 45.37 3.2
 -4 -17 3 45.35 3.22
 4 17 3 45.22 3.65
 -4 17 -3 44.07 3.25
 -4 17 -3 49.83 3.41
 4 -17 -3 43.05 3.23
 4 17 3 54.7 3.72
 4 17 3 46.44 3.44
 5 -17 3 1.86 1
 5 17 -3 1.79 1.17
 5 17 -3 0.91 0.81
 -5 -17 -3 2.98 1.14
 -5 17 3 2.49 0.95
 5 17 3 2.39 1.26
 5 17 3 0.91 1.07
 5 17 3 0.65 0.86
 -5 -17 3 1.93 0.96
 -5 17 -3 1.05 0.81
 5 -17 -3 2.48 1.1
 6 17 -3 52.21 3.84
 6 17 -3 48.36 3.74
 6 -17 3 58.34 3.68
 -6 17 3 49.1 3.71
 -6 -17 -3 52.93 3.76
 6 17 -3 48.43 3.8
 6 -17 -3 50.64 3.65
 -6 17 -3 54.94 3.75
 6 17 3 50.74 3.92
 -6 -17 3 50.82 3.62
 6 17 3 51.65 4.02
 6 17 3 51.11 4.02
 -7 17 3 2.66 1.23
 7 -17 3 1.13 1.05
 7 17 -3 1.61 1.14
 7 17 -3 -0.22 0.99
 7 17 -3 2.89 1.25
 7 17 3 1.57 1.05
 -7 17 -3 1.25 1.14
 7 17 3 3.31 1.51
 7 17 3 2.18 1.29
 7 -17 -3 2.7 1.21
 8 17 -3 50.3 4.07
 8 17 -3 50.6 4.09
 8 17 -3 40.86 3.76
 -8 17 3 47.35 3.74
 8 -17 3 46.87 3.53
 8 17 3 38.09 3.77
 8 17 3 45.76 4.11
 8 -17 -3 44.87 3.66
 -8 17 -3 53.28 3.87
 8 17 3 48.9 3.95
 9 17 -3 3.87 1.5
 -9 17 3 2.68 1.28
 9 17 -3 3.28 1.48
 9 17 -3 2.84 1.59
 9 17 3 3.57 1.63
 -9 17 -3 2.53 1.4
 9 17 3 2.47 1.73
 9 -17 -3 2.74 1.48
 9 17 3 2.14 1.57
 10 17 -3 11.84 2.45
 -10 17 3 11.12 2.22
 10 17 -3 16.38 2.68
 10 17 -3 14.19 2.71
 10 17 3 16.55 2.83
 10 17 3 13.86 2.86
 10 -17 -3 14.01 2.45
 -10 17 -3 17.7 2.71
 10 17 3 11.6 2.36
 11 17 -3 7.61 2.35
 11 17 3 6.32 2.23
 -11 17 -3 7.86 2.15
 11 -17 -3 4.04 1.89
 11 17 3 6.71 2.35
 11 17 3 6.59 2.33
 0 -18 3 8.1 1.41
 0 -18 -3 8.58 1.6
 0 18 -3 8.78 1.57
 0 18 3 9.33 1.71
 0 18 -3 9.44 1.62
 0 18 3 7.62 1.66
 0 18 3 9.97 1.81
 -1 18 3 0.87 0.85
 1 18 -3 -0.44 0.6
 -1 -18 -3 0.76 0.8
 -1 18 3 0.93 0.87
 1 -18 3 1.02 0.82
 1 18 -3 1.21 0.83
 -1 18 3 1.23 0.92
 1 18 3 2.16 1.01
 -1 -18 3 1.65 0.77
 -1 18 -3 1.4 0.91
 -1 18 -3 0.6 0.76
 1 18 3 0.35 0.74
 1 18 3 -0.55 0.74
 1 -18 -3 -0.23 0.7
 -2 18 3 28.52 2.7
 -2 -18 -3 33.34 2.78
 2 -18 3 27.11 2.41
 2 18 -3 29.9 2.63
 -2 18 3 29.12 2.79
 -2 18 3 34.45 2.78
 2 18 -3 30.34 2.69
 2 18 3 31.27 2.8
 -2 18 -3 35.04 2.82
 2 18 3 36.74 3.02
 2 18 3 32.26 2.75
 -2 18 -3 33.26 2.67
 -2 -18 3 30.5 2.5
 2 -18 -3 33.91 2.7
 -3 18 3 19.44 2.16
 3 18 -3 16.9 2.06
 -3 18 3 16.36 2.16
 3 18 -3 19.32 2.21
 -3 -18 -3 19.5 2.1
 -3 18 3 16.32 2.09
 3 18 -3 15.59 1.94
 3 -18 3 17.37 1.94
 3 18 3 18.21 2.13
 3 18 3 23.45 2.36
 -3 -18 3 19.11 1.94
 -3 18 -3 14.72 1.88
 -3 18 -3 21.05 2.2
 -3 18 -3 21.82 2.21
 3 -18 -3 14.73 1.85
 3 18 3 20.44 2.31
 4 -18 3 38.87 3.01
 -4 18 3 41.78 3.35
 4 18 -3 40.12 3.28
 4 18 -3 38.92 3.24
 -4 18 3 39.13 3.19
 -4 -18 -3 40.48 3.22
 4 18 -3 35.96 3
 4 18 3 35.87 3.25
 -4 18 -3 45.49 3.29
 4 18 3 35.99 3.18
 -4 -18 3 42.38 3.13
 4 -18 -3 45.32 3.28
 4 18 3 41.13 3.26
 -4 18 -3 35.69 2.97
 5 -18 3 30.27 2.69
 5 18 -3 32.03 2.91
 -5 18 3 29.64 2.73
 5 18 -3 28.13 2.8
 -5 -18 -3 29.52 2.74
 5 -18 -3 37.27 3.02
 5 18 3 33.14 2.88
 -5 -18 3 34.53 2.74
 5 18 3 26.85 2.88
 -5 18 -3 33.98 2.88
 5 18 3 29.8 3.02
 -6 -18 -3 0.55 0.9
 -6 18 3 0.54 0.91
 6 18 -3 0.71 0.97
 6 18 -3 -0.14 0.97
 6 18 -3 0.33 0.76
 6 18 3 0.8 1.12
 6 -18 -3 -0.44 0.92
 6 18 3 0.26 1.01
 -6 18 -3 0.45 0.97
 7 18 -3 29.76 3.1
 7 18 -3 30.31 3.01
 -7 -18 -3 36.36 3.18
 -7 18 3 38.75 3.21
 7 18 -3 43.51 3.55
 7 18 3 30.03 3.38
 -7 18 -3 36.45 3.17
 7 18 3 25.53 3.03
 7 18 3 35.84 3.49
 7 -18 -3 29.55 2.91
 -8 18 3 0.39 1.23
 8 18 -3 0.5 0.9
 8 18 -3 0.39 1.28
 8 18 -3 -0.25 1.17
 8 18 3 -0.29 1.29
 8 18 3 2.24 1.38
 8 -18 -3 -0.08 1.09
 8 18 3 0.52 1.1
 -8 18 -3 0.38 1.07
 9 18 -3 30.06 3.22
 9 18 -3 25.21 3.23
 -9 18 3 23.03 2.84
 9 18 -3 24.83 3.26
 -9 18 -3 25.38 2.81
 9 18 3 21.97 2.91
 9 -18 -3 22.51 2.76
 9 18 3 23.8 3.52
 9 18 3 24.99 3.24
 10 18 -3 1.71 1.69
 10 18 -3 0.03 1.66
 10 18 -3 2.4 1.99
 -10 18 3 2.24 1.46
 10 -18 -3 1.41 1.37
 10 18 3 0.58 1.19
 10 18 3 -1.64 1.33
 10 18 3 0.04 1.57
 -10 18 -3 1.66 1.54
 11 -18 -3 3.32 1.86
 11 18 3 6.06 2.29
 0 19 3 -0.12 0.92
 0 19 -3 0 0.76
 0 19 3 -0.04 0.9
 0 19 3 0.03 0.88
 0 19 -3 0.13 0.84
 0 -19 3 -0.14 0.74
 0 -19 -3 -0.05 0.69
 0 19 -3 -0.47 0.66
 -1 19 3 27.6 2.71
 1 -19 3 28.62 2.51
 -1 19 3 28.72 2.81
 1 19 -3 21.96 2.41
 1 19 -3 25.96 2.53
 -1 -19 -3 23.66 2.47
 -1 19 3 27.81 2.78
 1 19 -3 32.49 2.72
 -1 19 -3 25.32 2.59
 1 19 3 27.15 2.66
 1 19 3 28.73 2.73
 -1 19 -3 28.57 2.56
 -1 19 -3 28.15 2.54
 -1 -19 3 31.51 2.54
 1 19 3 27.05 2.78
 1 -19 -3 28.11 2.62
 -2 -19 -3 20.86 2.15
 2 19 -3 14.98 2
 2 19 -3 22.78 2.31
 -2 19 3 12.73 2.09
 2 19 -3 14.05 2.15
 -2 19 3 17.4 2.05
 -2 19 3 15.8 2.12
 2 -19 -3 16.1 2.06
 -2 19 -3 15.96 2.05
 -2 19 -3 17.06 2
 2 19 3 16.23 2.13
 2 19 3 19.55 2.27
 -2 19 -3 17.16 1.99
 2 19 3 16.13 2.15
 -3 19 3 5.17 1.4
 3 19 -3 4.16 1.34
 -3 -19 -3 5.54 1.4
 -3 19 3 5.93 1.5
 -3 19 3 4.64 1.5
 3 19 -3 4.23 1.37
 3 19 -3 8.23 1.64
 3 19 3 5.87 1.69
 3 19 3 8.31 1.73
 -3 19 -3 6.79 1.47
 -3 19 -3 5.42 1.5
 -3 19 -3 5.16 1.4
 3 19 3 4.07 1.37
 3 -19 -3 4.19 1.26
 -4 19 3 22.28 2.39
 4 19 -3 28.04 2.77
 4 19 -3 15.21 2.16
 4 19 -3 23.18 2.56
 -4 -19 -3 20.25 2.31
 -4 19 3 24.39 2.6
 -4 19 -3 21.05 2.41
 4 19 3 28.68 2.75
 -4 19 -3 20.86 2.4
 4 19 3 22.31 2.59
 4 19 3 22.71 2.46
 4 -19 -3 21.88 2.28
 -5 19 3 8.44 1.74
 5 19 -3 8.3 1.8
 5 19 -3 8.29 1.77
 5 19 -3 7.16 1.67
 -5 -19 -3 9.86 1.93
 5 19 3 9.04 1.87
 -5 19 -3 8.48 1.7
 5 19 3 7.42 1.93
 5 -19 -3 8.55 1.79
 5 19 3 11.55 2.12
 6 19 -3 41 3.61
 -6 19 3 43.02 3.56
 6 19 -3 32.43 3.27
 6 19 -3 40.95 3.41
 -6 -19 -3 44.88 3.55
 6 19 3 37.22 3.59
 6 19 3 40.58 3.51
 6 -19 -3 40.99 3.42
 -6 19 -3 40.5 3.44
 7 19 -3 -0.46 0.94
 7 19 -3 -0.98 1.04
 -7 -19 -3 -0.04 1.18
 7 19 -3 0.55 1.07
 -7 19 3 0.23 0.99
 7 19 3 -0.91 1.12
 -7 19 -3 -0.39 1.13
 7 19 3 2.4 1.49
 7 19 3 0.09 1.18
 7 -19 -3 -0.91 1.08
 8 19 -3 43.7 4.04
 -8 19 3 42.64 3.87
 8 19 -3 46.79 4
 8 19 -3 49.42 4.12
 -8 -19 -3 46.66 3.84
 8 19 3 46.95 4.15
 8 19 3 46.44 4.12
 8 19 3 43.28 4.09
 8 -19 -3 40.42 3.69
 -8 19 -3 43.19 3.69
 9 19 -3 1.17 1.53
 9 19 -3 2.27 1.67
 9 19 -3 3.84 1.59
 -9 19 3 2.83 1.43
 9 19 3 4.28 1.87
 9 19 3 7.18 2.1
 9 -19 -3 2.43 1.58
 9 19 3 4.42 1.8
 -9 19 -3 3.56 1.49
 10 19 3 13.97 2.83
 -10 19 -3 15.7 2.73
 10 -19 -3 7.82 2.2
 0 20 3 17.37 2.58
 0 20 3 18.96 2.23
 0 20 -3 17.54 2.11
 0 20 3 12.69 2.17
 0 20 -3 13.16 2.1
 0 20 -3 17.22 2.16
 0 -20 -3 16.82 2.16
 1 20 -3 6.26 1.51
 -1 -20 -3 6.44 1.58
 1 20 -3 6.42 1.6
 -1 20 3 6.01 1.6
 -1 20 3 7.85 1.69
 -1 20 3 3.61 1.31
 1 20 -3 7.05 1.59
 -1 20 -3 7.7 1.69
 -1 20 -3 5.51 1.37
 1 20 3 8.81 1.94
 -1 20 -3 6.29 1.52
 1 20 3 6.23 1.61
 1 20 3 7.78 1.67
 1 -20 -3 11.27 1.9
 -2 -20 -3 17.87 2.25
 2 20 -3 14.85 2.05
 -2 20 3 13.18 2.22
 2 20 -3 15.95 2.41
 2 20 -3 16.28 2.09
 -2 20 3 15.63 2.08
 -2 20 3 21.45 2.46
 2 20 3 20.9 2.57
 -2 20 -3 20.72 2.27
 2 20 3 17.54 2.34
 -2 20 -3 17.8 2.18
 2 20 3 20.23 2.36
 -2 20 -3 20.11 2.41
 2 -20 -3 15.51 2.03
 3 20 -3 20.68 2.3
 -3 20 3 23.32 2.67
 -3 20 3 14.78 2.4
 3 20 -3 15.59 2.08
 3 20 -3 17.08 2.31
 -3 20 3 16.08 2.11
 -3 -20 -3 12.39 2.02
 3 20 3 14.09 2.42
 3 20 3 16.18 2.43
 3 -20 -3 15.2 2.02
 -3 20 -3 18.1 2.21
 -3 20 -3 16.02 2.08
 -3 20 -3 18.62 2.26
 3 20 3 16.48 2.23
 -4 -20 -3 7.48 1.69
 4 20 -3 10.4 1.96
 4 20 -3 9.69 1.99
 4 20 -3 9.66 1.86
 -4 20 3 9.6 1.84
 -4 20 3 12.85 2.26
 4 -20 -3 7.54 1.7
 4 20 3 3.39 1.55
 4 20 3 6.1 1.7
 -4 20 -3 7.96 1.88
 -4 20 -3 9.91 1.83
 4 20 3 7.21 1.94
 5 20 -3 16.76 2.52
 5 20 -3 20.13 2.59
 5 20 -3 23.21 2.68
 -5 -20 -3 15.39 2.44
 -5 20 3 15.88 2.2
 5 -20 -3 12.72 2.3
 5 20 3 15.35 2.51
 -5 20 -3 13.23 2.17
 5 20 3 21.23 2.66
 5 20 3 17.74 2.8
 6 20 -3 0.52 1.16
 6 20 -3 -0.65 0.76
 6 20 -3 -0.13 1.09
 -6 -20 -3 0.22 1.1
 -6 20 3 -0.34 0.98
 -6 20 -3 -1.3 0.96
 6 20 3 0.7 1.08
 6 20 3 0.28 1.18
 6 20 3 -0.44 1.23
 6 -20 -3 0.54 1.17
 7 20 -3 23 2.99
 7 20 -3 25.19 2.87
 -7 -20 -3 24.7 2.86
 7 20 -3 26.09 3.06
 -7 20 3 24.68 2.9
 7 -20 -3 28.03 3.01
 7 20 3 28.01 3.25
 7 20 3 25.96 2.98
 -7 20 -3 27.05 2.92
 7 20 3 21.55 2.99
 8 20 -3 2.35 1.45
 8 20 -3 -0.21 1.4
 8 20 -3 0.79 1.54
 -8 20 3 1.58 1.4
 -8 -20 -3 2.45 1.48
 8 -20 -3 2.75 1.43
 8 20 3 2.71 1.64
 8 20 3 1.19 1.52
 -8 20 -3 0.8 1.17
 8 20 3 0.2 1.46
 -9 20 3 20.49 3.07
 -9 -20 -3 24.43 3.52
 9 -20 -3 26.79 3.32
 9 20 3 21.22 3.26
 -9 20 -3 23 2.88
 0 21 -3 0.32 0.9
 0 -21 -3 -0.32 0.92
 0 21 3 0.39 1.06
 0 21 3 -1.03 0.89
 0 21 -3 -0.15 0.83
 0 21 -3 0.84 1.05
 0 21 3 -0.98 0.93
 1 21 -3 11.24 2.01
 -1 21 3 10.71 2.02
 1 21 -3 12.28 2.18
 1 21 -3 10.31 2.02
 -1 -21 -3 7.81 1.78
 -1 21 3 13.67 2.22
 -1 21 3 13.86 2.35
 1 21 3 8.38 1.97
 1 21 3 7.37 1.81
 1 21 3 13.93 2.25
 -1 21 -3 10.42 1.93
 -1 21 -3 8.45 1.92
 -1 21 -3 11.04 1.96
 1 -21 -3 10.49 1.91
 -2 21 3 4.7 1.48
 2 21 -3 6.47 1.67
 2 21 -3 8.16 1.93
 2 21 -3 6.99 1.69
 -2 -21 -3 8.23 1.73
 -2 21 3 6.86 1.7
 -2 21 3 6.52 1.83
 -2 21 -3 4.7 1.65
 2 21 3 6.71 1.72
 2 21 3 5.85 1.71
 -2 21 -3 5.16 1.46
 -2 21 -3 5.93 1.5
 2 -21 -3 4.94 1.46
 2 21 3 5.97 1.71
 -3 21 3 13.98 2.44
 3 21 -3 15.34 2
 -3 -21 -3 6.4 1.76
 3 21 -3 9.49 2.01
 3 21 -3 8.24 1.88
 -3 21 3 8.49 1.86
 -3 21 -3 11.71 2.13
 3 21 3 12.35 2.06
 -3 21 -3 11.49 1.99
 3 21 3 10.09 2.12
 3 21 3 11.07 2.27
 3 -21 -3 10.52 1.97
 -4 21 3 14.78 2.45
 4 21 -3 12 2.16
 -4 21 3 11.27 2.15
 4 21 -3 11.78 2.19
 -4 -21 -3 11.07 2.08
 4 21 -3 11.23 2.17
 4 21 3 15.02 2.48
 -4 21 -3 15.31 2.34
 4 -21 -3 12.09 2.24
 4 21 3 12.98 2.36
 4 21 3 7.65 2.05
 -4 21 -3 18.4 2.66
 -5 -21 -3 1.75 1.25
 5 21 -3 -0.41 0.97
 -5 21 3 2.18 1.27
 5 21 -3 1.07 1.25
 5 21 -3 2.34 1.1
 5 21 3 0.96 1.22
 5 21 3 0.83 1.32
 5 -21 -3 2.15 1.33
 -5 21 -3 0.58 1.09
 5 21 3 0.51 1.3
 6 21 -3 22.95 2.81
 6 21 -3 21.26 2.74
 -6 -21 -3 23 2.72
 6 21 -3 14.91 2.68
 -6 21 3 19.91 2.73
 6 21 3 22.85 2.91
 6 -21 -3 26.07 2.92
 6 21 3 21.89 2.95
 6 21 3 26.81 3.08
 -6 21 -3 24.98 2.84
 -7 -21 -3 -0.45 1.09
 -7 21 3 -0.31 1.15
 7 21 -3 1.35 1.47
 7 21 -3 0.23 1.51
 7 21 -3 -0.7 1.04
 7 -21 -3 -2.19 1.01
 7 21 3 -0.43 1.34
 -7 21 -3 0.78 1.26
 7 21 3 1.23 1.3
 7 21 3 -0.74 1.19
 -8 21 3 26.16 3.24
 -8 -21 -3 28.65 3.32
 8 21 3 23 3.45
 8 -21 -3 24.11 2.98
 8 21 3 26.06 3.53
 -8 21 -3 29.32 3.34
 -9 21 3 3.03 1.66
 9 -21 -3 4.99 1.78
 0 22 -3 3.02 1.37
 0 22 -3 5.88 1.69
 0 22 3 5.66 1.62
 0 22 -3 7.02 1.86
 0 -22 -3 6.15 1.57
 0 22 3 8.85 2.02
 0 22 3 6.23 1.96
 1 22 -3 5.49 1.66
 -1 22 3 5.29 1.55
 -1 22 3 2.36 1.35
 1 22 -3 1.47 1.22
 1 22 -3 5.49 1.63
 -1 -22 -3 4.57 1.46
 -1 22 3 4.28 1.72
 1 22 3 6.59 1.77
 1 -22 -3 4.35 1.58
 1 22 3 1.32 1.32
 1 22 3 6.15 1.84
 -1 22 -3 5.81 1.68
 -1 22 -3 4.03 1.48
 -1 22 -3 4.07 1.46
 2 22 -3 3.92 1.36
 2 22 -3 3.2 1.39
 -2 -22 -3 4.49 1.56
 -2 22 3 1.18 1.32
 -2 22 3 3.66 1.48
 -2 22 3 4.47 1.51
 2 22 -3 3.38 1.45
 2 22 3 4.07 1.54
 2 -22 -3 3.72 1.55
 -2 22 -3 3.55 1.4
 -2 22 -3 3.38 1.43
 2 22 3 3.93 1.48
 -2 22 -3 4.65 1.45
 2 22 3 4.4 1.72
 -3 22 3 21.22 2.71
 3 22 -3 22.57 2.61
 -3 22 3 29.08 3.16
 3 22 -3 25.09 2.82
 3 22 -3 18.91 2.49
 -3 -22 -3 18.02 2.78
 3 22 3 21.82 2.77
 -3 22 -3 18.12 2.8
 3 22 3 23.21 2.81
 3 22 3 30.38 3.17
 -3 22 -3 19.6 2.46
 3 -22 -3 23.16 2.69
 4 22 -3 6.06 1.82
 -4 -22 -3 4.96 1.56
 4 22 -3 5.96 1.78
 -4 22 3 3.17 1.72
 -4 22 3 2.89 1.52
 4 22 -3 6.27 1.77
 -4 22 -3 9.03 2.06
 -4 22 -3 5.51 1.75
 4 -22 -3 8.21 2.04
 4 22 3 5.25 1.84
 4 22 3 5.17 1.73
 4 22 3 5.55 1.88
 5 22 -3 20.01 3.06
 5 22 -3 17.45 2.81
 -5 22 3 22.56 2.77
 -5 -22 -3 26.57 2.82
 5 22 -3 22.09 2.73
 5 -22 -3 20.17 2.66
 5 22 3 22.49 3.02
 -5 22 -3 20.85 2.57
 5 22 3 21.78 2.84
 5 22 3 20.72 2.85
 -6 22 3 0.7 1.29
 -6 -22 -3 0.72 1.38
 6 22 -3 0.59 1.53
 6 22 -3 3.01 1.71
 6 22 -3 -1.84 0.95
 6 22 3 0.49 1.33
 6 22 3 -0.46 1.39
 6 22 3 -0.04 1.21
 6 -22 -3 0.05 1.23
 -6 22 -3 0.19 1.15
 -7 -22 -3 23.7 2.95
 -7 22 3 24.82 3.05
 7 22 -3 16.58 2.89
 7 22 3 26.58 3.35
 -7 22 -3 25.12 3.05
 7 22 3 21.79 3.37
 7 -22 -3 19.81 3.01
 -8 -22 -3 3.27 1.59
 -8 22 3 2.85 1.71
 8 -22 -3 6.21 1.96
 8 22 3 6.08 1.96
 0 23 -3 0.72 1.18
 0 23 3 -0.39 1.18
 0 23 -3 1.33 1.25
 0 23 3 -0.95 1.1
 0 23 3 -1.1 1.31
 0 23 -3 -0.21 1.33
 0 -23 -3 0.12 1.16
 -1 23 3 2.47 1.58
 -1 -23 -3 2.46 1.48
 -1 23 3 5.67 1.62
 1 23 -3 1.65 1.37
 1 23 -3 2.99 1.47
 -1 23 3 2.33 1.47
 1 23 -3 3.17 1.63
 1 23 3 5.41 1.97
 -1 23 -3 3.94 1.52
 -1 23 -3 2.01 1.27
 1 23 3 2.56 1.6
 1 -23 -3 1.19 1.32
 1 23 3 6.04 1.71
 -1 23 -3 4.23 1.69
 2 23 -3 5.57 1.71
 2 23 -3 9.12 2.19
 -2 23 3 5.08 1.69
 -2 23 3 4.51 1.85
 2 23 -3 8.53 2.09
 -2 23 3 6.08 1.78
 -2 -23 -3 6.01 1.79
 2 23 3 7.5 1.9
 -2 23 -3 9.6 2.11
 2 23 3 5.46 1.85
 2 23 3 4.97 1.63
 -2 23 -3 7.51 2.04
 -2 23 -3 6.07 1.77
 2 -23 -3 5.12 1.71
 3 23 -3 2.39 1.45
 3 23 -3 1.7 1.38
 -3 -23 -3 4.25 1.52
 3 23 -3 3.27 1.46
 -3 23 3 2.71 1.52
 -3 23 3 4.69 1.73
 3 23 3 2.86 1.52
 3 23 3 1.6 1.3
 -3 23 -3 3.75 1.48
 3 23 3 4.89 1.65
 3 -23 -3 -0.29 1.18
 -3 23 -3 3.24 1.39
 -4 -23 -3 10.6 2.13
 4 23 -3 6.71 1.87
 -4 23 3 9.77 2.16
 4 23 -3 9.47 2.17
 4 23 -3 5.08 1.96
 -4 23 3 9.07 2.34
 -4 23 -3 8.85 2.1
 -4 23 -3 6.66 1.98
 4 -23 -3 11.27 2.18
 4 23 3 7.88 2.05
 4 23 3 7.15 2.05
 4 23 3 9.21 2.4
 -5 -23 -3 -0.21 1.3
 5 23 -3 0.15 1.55
 5 23 -3 0.21 1.52
 5 23 -3 0.48 1.35
 -5 23 3 1.99 1.53
 5 -23 -3 -0.65 1.23
 5 23 3 1.05 1.68
 5 23 3 -0.31 1.46
 5 23 3 -0.12 1.43
 -5 23 -3 -0.18 1.28
 -6 23 3 8.58 2.21
 -6 -23 -3 11.35 2.52
 6 23 3 12.8 2.56
 6 -23 -3 14.19 2.74
 6 23 3 13.27 2.66
 -7 -23 -3 1.62 1.68
 7 -23 -3 1.7 1.51
 0 24 3 5.63 1.8
 0 24 -3 6.69 2.11
 0 24 3 8.69 2.05
 0 -24 -3 6.73 1.92
 0 24 3 3.67 1.74
 0 24 -3 7.85 2.09
 0 24 -3 5.58 1.82
 1 24 -3 2.96 1.81
 -1 24 3 4.53 1.77
 1 24 -3 4.31 1.62
 -1 -24 -3 1.4 1.41
 -1 24 3 4.61 1.81
 -1 24 3 6.28 2.03
 1 24 -3 4.08 1.98
 -1 24 -3 1.56 1.77
 1 24 3 6.88 2.13
 1 -24 -3 5.8 1.79
 1 24 3 3.75 1.71
 -1 24 -3 3.84 1.59
 1 24 3 7.97 2.15
 -1 24 -3 5.91 2.04
 -2 24 3 12.51 2.49
 2 24 -3 13.15 2.61
 2 24 -3 9.63 2.07
 -2 -24 -3 11.17 2.29
 2 24 -3 11.74 2.63
 -2 24 3 9.18 2.51
 -2 24 3 8.26 2.22
 -2 24 -3 11.75 2.61
 2 24 3 7.88 2.14
 2 -24 -3 7.69 2.01
 2 24 3 13.25 2.57
 -2 24 -3 10.48 2.3
 2 24 3 7.57 2.26
 -2 24 -3 14.25 2.61
 -3 -24 -3 21.98 2.98
 -3 24 3 19.22 3.1
 -3 24 3 21.61 2.87
 3 24 -3 17.07 2.78
 3 24 -3 19.9 3.08
 3 24 3 23.08 3.06
 3 24 3 20.41 3.23
 3 -24 -3 18.66 2.87
 3 24 3 19.46 3.25
 -3 24 -3 19.68 2.73
 -4 24 3 4.79 2.04
 -4 -24 -3 4.07 1.97
 4 24 3 8.29 2.26
 4 -24 -3 2.8 1.67
 -5 24 3 21.83 2.94
 5 24 3 17.12 2.94
 0 25 3 -2.11 1.49
 -1 25 3 4.23 2.09
 1 25 3 5.83 1.98
 -2 25 3 1.11 1.69
 2 25 3 2.15 1.64
 0 0 -4 619.29 22.99
 0 0 -4 599.82 22.96
 0 0 -4 595.4 22.96
 1 0 -4 0.25 0.16
 1 0 4 0.23 0.18
 -1 0 -4 0.12 0.15
 1 0 4 0.16 0.17
 1 0 -4 0.31 0.19
 2 0 -4 544.58 21.28
 -2 0 -4 545.87 21.27
 2 0 -4 554.98 21.22
 2 0 4 552.59 21.34
 2 0 -4 550.68 20.9
 2 0 4 554.44 21.47
 2 0 4 572.42 21.08
 -2 0 4 543.98 21.22
 2 0 -4 557.43 21.27
 -3 0 -4 40.14 1.98
 3 0 4 34.42 1.96
 3 0 4 40.56 2.06
 3 0 4 37.63 1.96
 3 0 -4 36.84 1.92
 -3 0 4 38.98 1.91
 3 0 -4 37.71 1.97
 3 0 -4 41.18 2
 3 0 -4 36.5 1.94
 4 0 4 165.63 7.31
 -4 0 -4 165.83 7.19
 4 0 -4 168.09 7.09
 4 0 -4 168.87 7.22
 -4 0 4 176.27 7.17
 4 0 4 168.08 7.29
 4 0 -4 179.08 7.24
 4 0 -4 181.84 7.26
 4 0 4 173.73 7.18
 5 0 -4 0.32 0.47
 5 0 4 0.56 0.51
 5 0 4 0.28 0.41
 5 0 4 0.46 0.48
 5 0 -4 0.62 0.46
 -5 0 4 0.87 0.5
 -5 0 -4 0.81 0.49
 5 0 -4 0.31 0.38
 6 0 -4 1.04 0.59
 6 0 4 0.81 0.66
 6 0 -4 0.4 0.54
 6 0 4 0.9 0.61
 6 0 -4 1.38 0.54
 6 0 4 0.66 0.62
 -6 0 -4 2.51 0.7
 -6 0 4 0.29 0.54
 -7 0 -4 39.79 2.57
 7 0 4 39.06 2.62
 7 0 -4 33.45 2.52
 7 0 4 39.57 2.57
 7 0 4 37.66 2.66
 -7 0 4 36.27 2.39
 7 0 -4 32.89 2.39
 8 0 4 39.27 2.83
 8 0 4 44.63 3.07
 8 0 -4 37.27 2.91
 -8 0 4 41.95 2.82
 8 0 -4 45.3 2.97
 -8 0 -4 44 2.91
 8 0 -4 45.19 3.03
 8 0 4 48.5 3.12
 9 0 -4 33.81 2.69
 9 0 -4 34.46 2.74
 9 0 4 40.62 2.9
 -9 0 4 38.11 2.77
 9 0 -4 38.61 2.98
 -9 0 -4 43.81 2.92
 9 0 -4 34.96 2.73
 9 0 4 41.66 3.04
 9 0 4 37.3 2.92
 10 0 4 97.45 5.54
 10 0 4 92.87 5.42
 10 0 -4 89.61 5.3
 10 0 -4 100.64 5.35
 10 0 -4 88.01 5.36
 10 0 -4 104.82 5.66
 10 0 4 92.08 5.25
 -10 0 -4 90.95 5.19
 10 0 -4 94 5.35
 11 0 -4 5.19 1.55
 -11 0 -4 2.25 0.98
 11 0 -4 4.02 1.41
 11 0 -4 4.36 1.32
 11 0 4 2.39 1.12
 11 0 4 3.15 1.25
 11 0 4 4.63 1.35
 11 0 -4 4.9 1.43
 12 0 4 132.99 7.46
 12 0 4 132.87 7.43
 -12 0 -4 131.47 7.24
 12 0 -4 135.8 7.44
 12 0 -4 128.76 7.49
 12 0 -4 137.94 7.39
 12 0 -4 146.34 7.71
 13 0 -4 0.13 1.2
 13 0 -4 1.18 1.4
 13 0 4 0.54 1.3
 -13 0 -4 -1.25 0.99
 13 0 4 0.07 1.27
 13 0 -4 0.17 1.34
 14 0 -4 102.83 6.57
 14 0 -4 92.41 6.3
 14 0 4 75.96 5.88
 14 0 4 96.67 6.32
 14 0 -4 94.13 6.23
 15 0 -4 4.76 2.22
 15 0 -4 0.51 1.51
 15 0 4 0.16 1.59
 15 0 -4 2.8 1.93
 0 -1 -4 -0.29 0.14
 0 -1 -4 0 0.15
 0 1 4 -0.04 0.16
 -1 -1 -4 0.12 0.23
 1 1 -4 0.41 0.18
 1 1 -4 0.28 0.19
 1 1 -4 0.27 0.15
 -1 1 4 0.66 0.23
 1 1 -4 0.69 0.19
 -1 1 -4 0.69 0.19
 1 1 4 0.48 0.23
 1 -1 -4 0.42 0.24
 1 -1 -4 0.53 0.24
 1 1 4 0.47 0.23
 1 1 4 0.56 0.25
 2 1 -4 12.26 0.83
 2 1 -4 12.45 0.81
 2 -1 4 14.33 0.88
 2 -1 4 13.15 0.87
 -2 -1 -4 12.03 0.86
 -2 1 4 12.42 0.85
 2 1 -4 12.89 0.85
 2 -1 4 13.28 0.84
 2 1 -4 11.57 0.82
 2 1 4 12.49 0.94
 2 1 4 11.7 0.9
 -2 -1 4 12.87 0.8
 2 -1 -4 13.93 0.89
 -2 1 -4 13.03 0.83
 2 -1 -4 13.43 0.89
 2 1 4 14.04 0.92
 2 -1 -4 12.42 0.87
 -3 1 4 0.05 0.28
 3 1 -4 -0.26 0.23
 -3 -1 -4 -0.1 0.31
 3 -1 4 0.15 0.3
 3 -1 4 0.02 0.3
 3 1 -4 0.3 0.28
 3 -1 4 0.17 0.33
 3 1 -4 -0.03 0.29
 -3 -1 4 0.29 0.31
 3 -1 -4 -0.05 0.33
 3 1 4 0.28 0.37
 3 -1 -4 -0.15 0.26
 3 1 4 0.13 0.36
 3 -1 -4 -0.3 0.25
 -3 1 -4 0.14 0.26
 3 -1 -4 -0.37 0.24
 3 1 4 0.14 0.34
 4 1 -4 1.95 0.53
 4 -1 4 1.49 0.52
 4 1 -4 1.36 0.45
 4 1 -4 0.78 0.49
 4 -1 4 1.86 0.52
 -4 -1 -4 1.34 0.51
 4 -1 4 0.72 0.45
 4 -1 4 1.17 0.51
 -4 1 4 1.51 0.52
 4 -1 -4 1.59 0.55
 4 -1 -4 2.35 0.56
 4 1 4 2.06 0.56
 4 1 4 0.57 0.46
 -4 -1 4 1.64 0.53
 4 -1 -4 1.56 0.52
 4 -1 -4 2.02 0.55
 4 1 4 2.64 0.59
 -4 1 -4 1.98 0.54
 5 -1 4 2.78 0.66
 5 1 -4 2.7 0.66
 5 1 -4 2.88 0.7
 5 -1 4 2.31 0.64
 5 -1 4 2.93 0.72
 5 1 -4 3.56 0.74
 -5 1 4 3.34 0.73
 -5 -1 -4 2.81 0.68
 5 -1 4 3.81 0.82
 5 1 4 1.96 0.63
 -5 1 -4 3.13 0.69
 5 -1 -4 5.23 0.91
 5 -1 -4 3.41 0.78
 5 -1 -4 3.98 0.77
 -5 -1 4 3.09 0.75
 5 1 4 2.35 0.71
 5 1 4 3.76 0.86
 5 -1 -4 4.62 0.81
 6 -1 4 -0.13 0.53
 6 -1 4 0.25 0.52
 -6 -1 -4 -0.17 0.41
 -6 1 4 0.16 0.5
 6 -1 4 1.21 0.59
 6 -1 4 -0.41 0.45
 6 1 -4 -0.24 0.52
 6 1 -4 -0.39 0.48
 -6 1 -4 -0.11 0.53
 6 -1 -4 0.78 0.52
 -6 -1 4 0.72 0.53
 6 1 4 0.3 0.52
 6 -1 -4 1.01 0.64
 6 1 4 -0.31 0.51
 6 -1 -4 -0.51 0.46
 6 1 4 0.26 0.53
 6 -1 -4 -0.42 0.36
 7 1 -4 1.6 0.8
 7 1 -4 2.53 0.84
 7 -1 4 2.25 0.86
 -7 1 4 0.27 0.57
 7 1 -4 0.97 0.78
 -7 -1 -4 1.36 0.71
 7 1 -4 0.4 0.67
 7 -1 4 0.73 0.65
 7 -1 4 1.46 0.74
 -7 -1 4 0.89 0.68
 7 -1 -4 0.76 0.65
 7 -1 -4 1.11 0.74
 7 1 4 0.39 0.63
 -7 1 -4 0.66 0.65
 7 1 4 3.75 1.04
 7 -1 -4 1.65 0.77
 7 1 4 0.08 0.58
 8 1 -4 7.61 1.42
 8 1 -4 7.55 1.33
 8 -1 4 11.19 1.65
 -8 1 4 5.44 1.2
 8 -1 4 7.03 1.34
 8 1 -4 7.81 1.38
 8 1 -4 7.59 1.39
 -8 -1 -4 4.61 1.13
 8 1 -4 6.77 1.34
 8 -1 4 7.8 1.42
 8 1 4 8.1 1.4
 8 -1 -4 7.2 1.43
 8 -1 -4 6.51 1.25
 -8 1 -4 8.06 1.37
 8 1 4 8.71 1.56
 8 -1 -4 7.48 1.32
 8 1 4 11.77 1.59
 -8 -1 4 6.83 1.24
 9 1 -4 2.04 0.95
 9 -1 4 2.99 1.07
 9 1 -4 3.19 1.03
 -9 -1 -4 2.38 0.93
 9 -1 4 3.07 1.17
 9 1 -4 3.71 1.09
 -9 1 4 3.13 1.05
 9 -1 4 4.11 1.25
 9 1 -4 2.43 1.09
 9 -1 -4 5.66 1.33
 9 1 4 2.01 1
 -9 1 -4 2.41 0.89
 9 1 4 2.91 1.05
 9 -1 -4 5.31 1.16
 9 1 4 3.66 1.08
 9 -1 -4 4.3 1.14
 9 -1 -4 4.81 1.22
 -9 -1 4 3.87 1.13
 10 -1 4 0.39 0.76
 10 1 -4 -0.27 0.83
 10 -1 4 0.46 0.77
 10 1 -4 0.87 1.1
 10 1 -4 -0.79 0.65
 -10 1 4 1.33 1
 10 -1 4 0.53 0.84
 10 1 -4 -0.26 0.74
 -10 -1 -4 0.73 0.73
 10 -1 -4 -0.5 0.63
 10 -1 -4 1.33 0.94
 10 1 4 1.37 0.93
 10 1 4 0.01 0.77
 10 -1 -4 -0.63 0.58
 -10 1 -4 -0.46 0.63
 10 -1 -4 -0.81 0.8
 10 1 4 -0.49 0.75
 11 1 -4 0.4 0.95
 -11 -1 -4 0.84 0.92
 11 1 -4 0.51 0.85
 11 -1 4 1.21 1.01
 11 -1 4 -0.94 0.86
 11 1 -4 -0.81 0.87
 11 -1 4 -0.64 0.84
 11 -1 -4 0.12 0.9
 11 -1 -4 1.97 1.13
 11 1 4 1.94 1.06
 11 -1 -4 0.36 0.97
 -11 1 -4 0.6 0.83
 11 1 4 0.78 1.06
 11 -1 -4 -1.65 0.61
 11 -1 -4 0.05 0.83
 11 1 4 0.08 0.84
 12 1 -4 -0.37 1.07
 -12 -1 -4 0.22 0.91
 12 1 -4 0.48 1.34
 12 -1 4 -0.32 0.94
 12 -1 4 0.99 1.19
 12 1 -4 0.72 1.2
 12 1 4 1.14 1.28
 12 -1 -4 0.3 1.17
 12 -1 -4 1.68 1.24
 12 1 4 -0.06 1.11
 12 1 4 1.44 1.13
 12 -1 -4 2.79 1.24
 -12 1 -4 0.49 0.98
 12 -1 -4 1.55 1.04
 13 -1 4 0.6 1.12
 13 1 -4 -0.46 1.31
 -13 -1 -4 1.08 1.21
 13 1 -4 -1.01 1.24
 13 1 -4 0.9 1.3
 13 -1 4 0.2 1.17
 13 -1 -4 0.16 1.18
 -13 1 -4 -1.17 0.96
 13 -1 -4 -0.52 1.15
 13 -1 -4 0.46 1.26
 13 -1 -4 0.96 1.29
 13 1 4 0.29 1.17
 13 1 4 -0.14 1.04
 14 -1 4 0.69 1.47
 14 -1 4 -0.97 1.26
 14 1 -4 1.3 1.46
 14 1 -4 -0.84 1.44
 14 1 -4 -0.28 1.43
 14 1 4 -0.74 1.3
 14 -1 -4 0.02 1.48
 14 1 4 -0.33 1.45
 14 -1 -4 -1.05 1.21
 14 -1 -4 1.97 1.64
 15 1 -4 2.52 1.99
 15 1 -4 4.48 1.96
 15 1 -4 2.31 1.79
 15 -1 4 0.35 1.53
 15 -1 -4 0.6 1.72
 15 -1 -4 -2.07 1.48
 15 -1 -4 2.6 1.75
 15 1 4 0.89 1.65
 0 2 -4 751.74 28.58
 0 2 4 738.58 28.27
 0 2 -4 732.2 28.34
 0 2 -4 734.73 28.39
 0 -2 -4 723.04 28.56
 0 2 4 766.84 28.61
 0 -2 -4 759.25 28.59
 0 2 4 773.51 28.55
 1 -2 4 8.33 0.55
 1 2 -4 8.99 0.53
 -1 -2 -4 9.87 0.71
 1 2 -4 9.38 0.59
 1 2 -4 8.57 0.56
 -1 2 4 7.8 0.64
 1 2 -4 9.48 0.59
 1 2 4 8.69 0.68
 -1 2 -4 8.82 0.54
 -1 2 -4 7.93 0.53
 1 -2 -4 7.69 0.65
 1 2 4 9.64 0.68
 1 -2 -4 9.1 0.68
 1 2 4 8.65 0.68
 2 -2 4 148.52 5.88
 2 2 -4 140.25 5.78
 2 -2 4 149.27 5.82
 2 -2 4 145.12 5.85
 2 2 -4 141.84 5.89
 2 2 -4 149.63 5.98
 -2 2 4 157.45 5.97
 -2 -2 -4 146.24 5.99
 2 -2 -4 145.9 5.98
 2 2 4 141.26 5.94
 2 -2 -4 143.04 5.96
 2 2 4 139.98 6.03
 2 -2 -4 147.51 5.97
 -2 2 -4 144.24 5.87
 2 2 4 148.59 6.08
 3 2 -4 24.79 1.42
 3 2 -4 21.69 1.38
 3 2 -4 22.62 1.39
 3 -2 4 22.63 1.38
 -3 -2 -4 24.45 1.46
 -3 2 4 24.29 1.42
 3 -2 4 22.5 1.38
 3 -2 4 22.49 1.36
 3 2 -4 22.44 1.43
 3 2 4 23.93 1.49
 3 -2 -4 23.62 1.45
 3 2 4 25 1.55
 -3 2 -4 22.04 1.36
 3 -2 -4 23.24 1.41
 3 -2 -4 24.09 1.42
 3 -2 -4 24.1 1.44
 -3 -2 4 22.47 1.34
 3 2 4 21.64 1.51
 4 -2 4 231.76 9.23
 4 -2 4 224.83 9.2
 4 2 -4 229.08 9.14
 4 -2 4 220.87 9.14
 4 2 -4 224.73 9.22
 -4 2 4 221.99 9.22
 -4 -2 -4 228.51 9.3
 4 2 -4 217.1 9.36
 4 2 -4 238.44 9.31
 -4 2 -4 233.33 9.23
 4 2 4 220.91 9.43
 4 2 4 232.41 9.42
 -4 -2 4 225.43 9.19
 4 -2 -4 231.93 9.15
 4 -2 -4 216.7 9.26
 4 -2 -4 219.05 9.26
 4 -2 -4 223.7 9.25
 4 2 4 217.71 9.24
 5 -2 4 24.28 1.76
 5 -2 4 26.52 1.77
 5 -2 4 26.71 1.87
 -5 2 4 25.26 1.74
 -5 -2 -4 25.05 1.77
 5 2 -4 27.99 1.82
 5 2 -4 29.99 1.86
 5 2 -4 25.94 1.83
 5 2 -4 22.11 1.72
 5 -2 4 25.84 1.77
 5 2 -4 29.18 1.9
 5 2 4 25.66 1.87
 5 -2 -4 28.37 1.8
 -5 -2 4 23.99 1.72
 5 2 4 24.92 1.84
 -5 2 -4 26.39 1.75
 5 -2 -4 26.36 1.84
 5 2 4 26.36 1.9
 5 -2 -4 26.04 1.79
 6 -2 4 6.09 1.05
 -6 2 4 6.38 1.01
 -6 -2 -4 6.57 1.05
 6 2 -4 5.68 1.1
 6 2 -4 5.39 1.06
 6 -2 4 5.73 1.09
 6 2 -4 4.48 0.96
 6 2 -4 7.29 1.11
 6 -2 4 8.13 1.09
 6 -2 4 5.64 1
 6 2 -4 5.59 1.06
 6 -2 4 5.26 1.03
 6 2 4 7.83 1.22
 6 -2 -4 8.13 1.21
 6 -2 -4 7.15 1.14
 6 -2 -4 6.26 1.05
 -6 2 -4 6.36 1.04
 6 -2 -4 7.29 1.15
 6 2 4 6.65 1.14
 -6 -2 4 6.65 1.02
 6 2 4 7.38 1.22
 7 2 -4 41.57 2.9
 7 -2 4 48.17 2.92
 -7 2 4 49.15 2.89
 7 2 -4 47.27 3.04
 7 -2 4 50.6 3.04
 7 -2 4 46.34 3.02
 -7 -2 -4 43.21 2.86
 7 2 -4 52.25 3.1
 7 -2 4 46.37 2.89
 7 2 -4 53.8 3.09
 7 2 -4 51.12 3
 -7 -2 4 47.88 2.9
 7 2 4 48.89 3.13
 7 -2 -4 44.21 2.99
 7 2 4 40.2 2.9
 7 -2 -4 45.95 2.92
 7 -2 -4 53.31 3.05
 -7 2 -4 50.16 2.96
 7 -2 -4 50.07 3
 7 2 4 45.61 3.02
 8 -2 4 23.16 2.17
 8 2 -4 25.64 2.18
 8 -2 4 20.03 2.1
 8 2 -4 24.59 2.19
 8 2 -4 25.7 2.19
 -8 -2 -4 26.36 2.18
 -8 2 4 23.31 2.1
 8 2 -4 29.05 2.34
 8 -2 4 24.49 2.21
 8 -2 4 23.38 2.08
 -8 -2 4 25.56 2.08
 8 -2 -4 25.95 2.07
 -8 2 -4 27.57 2.19
 8 2 4 25.76 2.34
 8 -2 -4 23.55 2.09
 8 -2 -4 21.51 2.09
 8 2 4 26.84 2.31
 8 2 4 24.53 2.2
 9 -2 4 22.7 2.25
 9 2 -4 21.65 2.12
 9 2 -4 17 1.98
 9 -2 4 18.59 2.03
 9 -2 4 23.85 2.23
 -9 -2 -4 21.01 2.01
 9 2 -4 20.48 2.14
 -9 2 4 23.49 2.13
 9 2 -4 20.94 2.17
 9 2 4 20.26 2.19
 9 -2 -4 24.15 2.18
 9 -2 -4 19.6 1.94
 9 2 4 18.04 2.18
 -9 -2 4 21.76 2.17
 -9 2 -4 23.66 2.08
 9 2 4 21.3 2.13
 9 -2 -4 24.49 2.23
 10 -2 4 78.81 4.93
 10 -2 4 100.87 5.19
 -10 -2 -4 88.88 4.96
 -10 2 4 94.58 4.98
 10 2 -4 82.61 4.97
 10 2 -4 83.36 5.1
 10 2 -4 83.85 5.15
 10 -2 4 83 5.01
 10 2 4 78.79 4.93
 10 -2 -4 84.13 4.97
 10 -2 -4 87.7 4.96
 10 2 4 82.92 5.06
 10 2 4 82.56 5.08
 10 -2 -4 88.77 4.97
 -10 2 -4 81.16 4.86
 10 -2 -4 81.41 4.98
 11 -2 4 0 0.81
 11 2 -4 0.07 0.9
 11 2 -4 -0.88 0.71
 11 -2 4 -0.31 0.94
 11 -2 4 -0.11 0.86
 11 2 -4 0.32 0.84
 -11 -2 -4 -0.13 0.71
 11 -2 -4 -0.27 0.8
 11 2 4 0.61 0.94
 11 -2 -4 0.34 0.87
 11 -2 -4 1.76 1.01
 11 2 4 -0.95 0.95
 11 -2 -4 0.85 0.97
 -11 2 -4 -0.24 0.79
 11 2 4 1.2 1.04
 12 2 -4 92.76 5.96
 12 -2 4 90.08 5.82
 12 -2 4 103.99 6.01
 12 2 -4 93.35 6
 -12 -2 -4 94.63 5.72
 12 2 -4 82.58 5.62
 12 2 4 97.6 5.85
 12 2 4 99.49 5.99
 12 -2 -4 94.96 5.81
 12 2 4 103.04 6.09
 12 -2 -4 93.48 5.95
 -12 2 -4 98.29 5.7
 12 -2 -4 89.34 5.67
 12 -2 -4 98.66 5.95
 13 -2 4 -0.03 1.3
 13 -2 4 0.45 1.32
 13 2 -4 -0.84 1.21
 -13 -2 -4 1.29 1.15
 13 2 -4 -0.39 1.14
 13 2 -4 1.72 1.28
 13 -2 -4 1.16 1.38
 13 2 4 0.25 1.27
 13 -2 -4 -1.58 1.03
 13 -2 -4 -1.09 1.22
 13 2 4 1.13 1.46
 13 -2 -4 1.86 1.3
 -13 2 -4 0.45 0.99
 14 2 -4 77.57 5.47
 14 2 -4 77.72 5.61
 14 2 -4 77.4 5.63
 14 -2 4 74.57 5.45
 -14 2 -4 74.68 5.32
 14 -2 -4 71.13 5.39
 14 -2 -4 66.79 5.13
 14 -2 -4 70.29 5.5
 14 2 4 76.81 5.63
 14 2 4 74.03 5.42
 15 2 -4 2.04 1.82
 15 2 -4 0.24 1.63
 15 2 -4 1.16 1.78
 15 2 4 -0.68 1.55
 15 -2 -4 0.46 1.81
 15 -2 -4 1.05 1.72
 15 -2 -4 -1.53 1.53
 15 2 4 0.81 1.69
 0 3 -4 -0.11 0.16
 0 3 4 0.11 0.25
 0 3 -4 0.06 0.15
 0 3 -4 -0.07 0.16
 0 3 -4 -0.21 0.16
 0 -3 -4 -0.24 0.22
 0 -3 -4 0.03 0.24
 0 -3 4 0.12 0.17
 0 3 4 -0.12 0.21
 0 3 4 0.02 0.24
 -1 3 4 37.47 1.81
 1 3 -4 36.55 1.65
 1 3 -4 37.19 1.69
 1 -3 4 34.01 1.61
 1 3 -4 36.46 1.7
 -1 -3 -4 36.02 1.82
 -1 3 4 33.93 1.77
 -1 3 4 35.48 1.8
 -1 3 -4 36.49 1.65
 1 3 4 36.9 1.8
 1 3 4 35.28 1.81
 1 3 4 39.04 1.86
 -1 3 -4 36.96 1.62
 1 -3 -4 34.5 1.77
 1 -3 -4 35.04 1.78
 -1 3 -4 35.37 1.62
 2 -3 4 13.4 0.9
 2 3 -4 12.57 0.92
 -2 3 4 15.54 1.04
 -2 -3 -4 17.04 1.08
 2 3 -4 14.58 0.98
 2 3 -4 14.96 1
 2 -3 4 14.09 0.92
 2 -3 4 13.52 0.91
 -2 3 -4 12.41 0.87
 2 3 4 17.34 1.11
 -2 -3 4 13.45 0.89
 2 -3 -4 12.68 0.97
 2 3 4 14.75 1.09
 2 3 4 15.47 1.1
 2 -3 -4 15.48 1.05
 3 3 -4 0.26 0.32
 3 3 -4 -0.38 0.27
 3 -3 4 1 0.38
 3 3 -4 -0.28 0.24
 3 -3 4 0.02 0.3
 -3 -3 -4 0.33 0.35
 3 -3 4 0.41 0.33
 -3 3 4 0.4 0.33
 3 -3 4 0.79 0.38
 -3 -3 4 0.2 0.31
 3 3 4 0.14 0.36
 -3 3 -4 0.23 0.34
 3 3 4 0.34 0.4
 3 -3 -4 1.08 0.42
 3 -3 -4 -0.49 0.25
 3 3 4 0.42 0.39
 3 -3 -4 0.31 0.32
 3 -3 -4 1.42 0.45
 4 3 -4 0.33 0.44
 4 3 -4 0.8 0.41
 4 3 -4 -0.75 0.23
 4 -3 4 0.24 0.4
 4 3 -4 -0.05 0.33
 -4 3 4 0.93 0.42
 -4 -3 -4 0.24 0.41
 4 -3 4 0.03 0.39
 4 -3 4 0.52 0.41
 4 -3 -4 0.01 0.37
 4 3 4 -0.01 0.42
 -4 -3 4 0.08 0.34
 4 -3 -4 0.44 0.43
 -4 3 -4 -0.11 0.34
 4 3 4 0.25 0.45
 4 -3 -4 -0.05 0.33
 4 3 4 0.1 0.4
 4 -3 -4 0.4 0.47
 5 -3 4 12.37 1.24
 5 3 -4 11.57 1.26
 -5 3 4 11.46 1.14
 -5 -3 -4 12.61 1.21
 5 3 -4 12.57 1.21
 5 -3 4 14.13 1.23
 5 -3 4 9.68 1.17
 5 3 -4 14.41 1.28
 5 3 -4 12.54 1.25
 -5 -3 4 11.19 1.14
 5 -3 -4 12.77 1.23
 -5 3 -4 13.11 1.25
 5 3 4 11.89 1.28
 5 3 4 10.5 1.32
 5 -3 -4 10.83 1.14
 5 -3 -4 12.51 1.27
 5 3 4 11.92 1.29
 5 -3 -4 9.85 1.14
 6 3 -4 6.21 1.11
 -6 -3 -4 8.33 1.21
 6 -3 4 6.59 1.06
 6 3 -4 6.27 1.16
 6 -3 4 7.15 1.13
 6 -3 4 4.23 0.93
 6 -3 4 4.04 0.89
 6 3 -4 7.44 1.18
 6 3 -4 6.1 1.11
 -6 3 4 7.49 1.04
 -6 -3 4 6.45 1.05
 6 -3 -4 8.2 1.13
 -6 3 -4 6.41 1.03
 6 -3 -4 6.44 1.14
 6 -3 -4 7.75 1.14
 6 3 4 6.37 1.19
 6 3 4 5.81 1.12
 6 -3 -4 6.82 1.1
 6 3 4 8.07 1.26
 7 -3 4 0.97 0.66
 7 -3 4 2.17 0.79
 7 3 -4 1.14 0.71
 7 3 -4 1.46 0.79
 7 -3 4 1.51 0.67
 7 3 -4 1.39 0.75
 7 -3 4 -0.38 0.56
 -7 -3 -4 0.81 0.67
 -7 3 4 1.88 0.7
 -7 3 -4 1.5 0.77
 7 -3 -4 1.8 0.77
 7 -3 -4 0.99 0.76
 -7 -3 4 1.05 0.71
 7 3 4 0.27 0.72
 7 3 4 0.48 0.64
 7 -3 -4 1.21 0.78
 7 3 4 0.66 0.71
 7 -3 -4 0.64 0.66
 8 -3 4 0.95 0.82
 8 3 -4 1.32 0.78
 8 -3 4 0.22 0.74
 -8 3 4 -0.28 0.6
 -8 -3 -4 0.41 0.69
 8 3 -4 0.24 0.63
 8 3 -4 0.38 0.6
 8 -3 4 0.22 0.72
 8 -3 4 1.45 0.88
 8 -3 4 0.64 0.7
 -8 3 -4 0.28 0.67
 8 -3 -4 1.83 0.88
 8 3 4 1 0.9
 -8 -3 4 1.64 0.8
 8 3 4 0.36 0.83
 8 -3 -4 1.46 0.83
 8 -3 -4 2.53 0.93
 8 3 4 1.6 0.86
 8 -3 -4 0.44 0.58
 9 -3 4 3.26 1.07
 9 3 -4 1.15 0.82
 9 -3 4 0.94 0.87
 9 -3 4 1.35 0.93
 -9 -3 -4 0.11 0.61
 9 3 -4 1.23 0.81
 9 3 -4 1.46 0.87
 -9 3 4 1.47 0.92
 9 -3 4 1.9 1.01
 9 -3 -4 2.2 0.83
 9 3 4 1.03 0.98
 9 3 4 0.79 0.87
 9 3 4 1.3 0.9
 -9 3 -4 0.96 0.74
 9 -3 -4 2.6 0.97
 9 -3 -4 1.36 0.76
 10 -3 4 5.86 1.43
 10 3 -4 1.83 1.19
 -10 3 4 7.34 1.52
 10 -3 4 2.75 1.14
 10 -3 4 5.2 1.31
 10 3 -4 3.89 1.3
 -10 -3 -4 3.02 1.06
 10 -3 4 4.29 1.28
 10 3 -4 4.24 1.31
 10 -3 -4 5.38 1.46
 10 -3 -4 1.97 1.03
 10 3 4 2.84 1.14
 -10 3 -4 4.65 1.15
 10 -3 -4 4.37 1.23
 10 3 4 3.39 1.23
 10 3 4 2.72 1.07
 11 3 -4 -0.06 0.92
 -11 -3 -4 0.58 0.98
 11 3 -4 2.37 1.12
 11 -3 4 0.91 1.02
 11 -3 4 1.35 0.89
 11 3 -4 0.37 0.95
 11 -3 -4 -0.02 1.06
 11 3 4 0.8 1.01
 11 -3 -4 -0.43 0.91
 11 3 4 0.52 1
 -11 3 -4 -0.53 0.88
 11 -3 -4 0.52 1.03
 11 3 4 -0.25 0.84
 11 -3 -4 -0.02 0.85
 -12 -3 -4 -0.3 1
 12 3 -4 0.12 1
 12 3 -4 -0.51 1.02
 12 3 -4 -0.31 0.97
 12 -3 4 0.03 0.93
 12 -3 4 -0.83 1.1
 12 3 4 0.01 1.09
 12 3 4 2.01 1.06
 12 -3 -4 0.87 1.17
 12 3 4 2.4 1.44
 12 -3 -4 0.1 1
 12 -3 -4 -0.47 1.03
 12 -3 -4 0.86 1.05
 -12 3 -4 0.21 0.91
 13 -3 4 1.05 1.19
 13 -3 4 -0.37 1.24
 13 3 -4 0.65 1.2
 13 3 -4 -0.43 1.2
 13 3 -4 -0.81 1.03
 13 -3 -4 1.31 1.35
 -13 3 -4 1.54 1.08
 13 -3 -4 -0.51 1.12
 13 3 4 1.3 1.34
 13 -3 -4 0.06 1.09
 13 3 4 2.23 1.4
 13 -3 -4 -1.44 1.05
 14 3 -4 1.46 1.47
 14 3 -4 -0.95 1.5
 14 3 -4 -1.05 1.42
 14 -3 4 1.36 1.48
 14 3 4 -2.51 1.54
 -14 3 -4 0.94 1.28
 14 -3 -4 1.14 1.42
 14 -3 -4 -1.98 1.19
 14 3 4 0.01 1.39
 14 -3 -4 -2.13 1.33
 14 -3 -4 0.02 1.5
 15 3 -4 -0.12 1.71
 15 3 -4 -0.53 1.65
 15 3 -4 0.74 1.98
 15 -3 -4 0.81 1.68
 15 3 4 1.35 1.78
 15 3 4 -1.53 1.66
 15 -3 -4 -2.01 1.55
 15 -3 -4 1.23 1.69
 0 4 -4 102.95 4.14
 0 4 4 100.8 4.31
 0 -4 4 108.21 4.16
 0 4 4 102.25 4.33
 0 -4 -4 97.92 4.34
 0 4 4 99.46 4.38
 0 -4 -4 105.36 4.38
 0 4 -4 99.98 4.2
 1 4 -4 123.3 5.07
 -1 4 4 126.07 5.3
 -1 4 4 131.73 5.25
 1 -4 4 123.25 5.02
 -1 4 4 120.38 5.19
 1 4 -4 130.56 5.2
 -1 -4 -4 123.66 5.27
 1 4 -4 118.37 5.14
 1 -4 4 129.21 5.08
 1 4 4 127.23 5.25
 1 4 4 127.25 5.32
 1 4 4 129.58 5.34
 1 -4 -4 132.15 5.28
 -1 4 -4 116.37 5.09
 1 -4 -4 125.12 5.27
 -1 4 -4 123.78 5.08
 -1 4 -4 125.32 5.05
 2 4 -4 249.03 9.95
 2 -4 4 277.14 9.88
 2 4 -4 253.42 9.82
 2 -4 4 238.83 9.79
 2 -4 4 244.57 9.61
 -2 4 4 242.31 9.95
 2 -4 4 250.07 9.79
 -2 -4 -4 241.07 10
 2 4 -4 247.07 9.99
 2 4 4 253.23 10.13
 2 4 4 229.32 10.04
 2 -4 -4 264.44 10.02
 2 -4 -4 244.26 9.97
 -2 -4 4 245.06 9.82
 -2 4 -4 243.36 9.82
 2 4 4 250.56 9.95
 3 4 -4 92.14 4.1
 3 4 -4 83.34 3.97
 3 -4 4 97.01 3.99
 -3 -4 -4 89.96 4.1
 3 4 -4 92.97 4.09
 3 -4 4 89.3 3.96
 3 -4 4 92.42 3.95
 -3 4 4 90.21 4.05
 3 -4 4 87.5 3.85
 -3 -4 4 85.89 3.93
 3 4 4 84.23 4.15
 3 -4 -4 86.94 4.04
 3 4 4 95.71 4.24
 -3 4 -4 92.54 3.97
 3 -4 -4 80.74 4.01
 3 4 4 93.53 4.12
 3 -4 -4 88.52 4.07
 4 4 -4 94.89 4.41
 4 4 -4 96.31 4.48
 4 -4 4 102.89 4.38
 4 -4 4 89.6 4.2
 4 4 -4 93.67 4.48
 4 -4 4 95.43 4.34
 4 -4 4 96.7 4.34
 -4 4 4 95.67 4.39
 -4 -4 -4 101.94 4.5
 -4 4 -4 97.07 4.35
 4 4 4 95.91 4.58
 4 -4 -4 99.93 4.5
 -4 -4 4 99.56 4.35
 4 -4 -4 91.86 4.4
 4 -4 -4 92.69 4.35
 4 4 4 98.6 4.5
 4 4 4 96.28 4.58
 4 -4 -4 88.52 4.38
 -5 -4 -4 0.71 0.54
 -5 4 4 0.75 0.51
 5 4 -4 0.91 0.53
 5 -4 4 0.86 0.49
 5 4 -4 -0.26 0.31
 5 -4 4 1.45 0.54
 5 -4 4 0.01 0.42
 5 4 -4 1.1 0.51
 5 -4 -4 0.47 0.49
 5 4 4 0.46 0.57
 5 -4 -4 0.19 0.47
 -5 -4 4 0.88 0.56
 5 4 4 0.88 0.54
 5 -4 -4 1.06 0.51
 5 -4 -4 0.46 0.52
 5 4 4 0.84 0.61
 -5 4 -4 0.51 0.49
 6 4 -4 5.9 1.1
 6 -4 4 5.06 0.99
 -6 4 4 5.42 0.97
 6 4 -4 6.24 1.1
 6 -4 4 5.55 1.01
 -6 -4 -4 5.6 1.04
 6 -4 4 6.05 1.03
 -6 4 -4 5.71 1
 6 4 4 3.72 0.93
 -6 -4 4 5.8 1.04
 6 -4 -4 5.51 1.05
 6 4 4 5.52 1.14
 6 4 4 3.5 0.99
 6 -4 -4 6.51 1.12
 6 -4 -4 6.72 1.08
 6 -4 -4 4.97 0.97
 7 4 -4 28.78 2.32
 7 -4 4 34.05 2.23
 7 -4 4 23.18 2.04
 7 4 -4 23.86 2.14
 -7 4 4 27.5 2.08
 7 -4 4 26.78 2.11
 7 4 -4 29.75 2.3
 7 -4 4 24.28 2.01
 -7 -4 -4 26.82 2.14
 7 -4 -4 30.48 2.29
 7 -4 -4 25.27 2.18
 7 4 4 25.78 2.23
 -7 4 -4 28.45 2.1
 -7 -4 4 26.17 2.03
 7 4 4 24.3 2.17
 7 4 4 27.61 2.29
 7 -4 -4 27.01 2.17
 7 -4 -4 26.36 2.12
 8 4 -4 35.3 2.6
 8 -4 4 31.74 2.37
 -8 -4 -4 34.16 2.51
 -8 4 4 33.94 2.48
 8 -4 4 30.25 2.44
 8 4 -4 30.41 2.42
 8 4 -4 28.6 2.45
 8 -4 4 29.79 2.38
 8 -4 4 30.46 2.42
 8 4 4 28.08 2.5
 -8 4 -4 29.71 2.31
 8 -4 -4 27.18 2.43
 8 -4 -4 33.24 2.54
 8 -4 -4 27.53 2.4
 8 -4 -4 30.39 2.37
 8 4 4 27.87 2.43
 8 4 4 36.6 2.71
 -8 -4 4 32.01 2.36
 9 4 -4 18.74 2.13
 9 -4 4 22.53 2.12
 9 4 -4 21.06 2.17
 -9 -4 -4 17.79 1.93
 -9 4 4 19.43 2.03
 9 -4 4 21.83 2.07
 9 -4 4 24.28 2.22
 9 4 -4 23.14 2.15
 9 -4 4 18.62 2.14
 9 -4 -4 21.68 2.12
 9 4 4 20.79 2.2
 9 4 4 18.12 2.09
 9 4 4 20.98 2.18
 9 -4 -4 16.28 1.98
 -9 4 -4 17.02 1.89
 9 -4 -4 20.16 2.01
 9 -4 -4 19.27 2.08
 10 4 -4 44.48 3.25
 10 -4 4 47.18 3.28
 -10 -4 -4 36.16 2.95
 10 -4 4 41.39 3.15
 10 -4 4 33.32 2.85
 10 -4 4 43.98 3.2
 10 4 -4 36.31 3.12
 -10 4 4 41.51 3.11
 10 4 -4 36.49 3.1
 10 4 4 43.26 3.31
 10 4 4 33.05 3.03
 10 -4 -4 32.18 2.83
 -10 4 -4 45.53 3.12
 10 4 4 33.22 3.02
 10 -4 -4 44.33 3.23
 10 -4 -4 36.05 2.99
 11 4 -4 -0.3 0.95
 11 -4 4 2.09 1.16
 11 -4 4 0.48 0.85
 11 4 -4 0.06 1.02
 11 4 -4 0.15 0.89
 -11 -4 -4 -0.25 0.81
 11 -4 -4 0.13 0.81
 11 4 4 0.36 0.93
 -11 4 -4 -0.73 0.77
 11 4 4 0.03 1.09
 11 -4 -4 1.04 0.98
 11 -4 -4 0.71 0.93
 11 4 4 0.56 1.05
 12 -4 4 76.48 5.35
 12 4 -4 91.21 5.65
 12 4 -4 86.16 5.72
 12 -4 4 95.23 5.68
 12 4 -4 95.91 5.89
 -12 -4 -4 89.31 5.5
 12 4 4 85.97 5.68
 -12 4 -4 85.01 5.41
 12 -4 -4 101.78 5.65
 12 -4 -4 84.13 5.41
 12 -4 -4 84.5 5.43
 12 -4 -4 80.88 5.38
 12 4 4 99.6 5.83
 12 4 4 83.28 5.63
 13 4 -4 -0.86 1.22
 13 -4 4 0.28 1.14
 13 4 -4 1.01 1.41
 13 4 -4 -0.65 1.16
 13 -4 -4 -1.17 1.19
 13 -4 -4 -0.07 1.21
 -13 4 -4 1.47 1.19
 13 -4 -4 -1.03 0.89
 13 4 4 0.83 1.32
 13 4 4 0.3 1.33
 14 4 -4 76.01 5.79
 14 4 -4 68.44 5.63
 14 4 -4 79.54 5.8
 14 4 4 73.98 5.74
 14 -4 -4 79.06 5.76
 14 -4 -4 89.22 5.83
 -14 4 -4 88.51 5.69
 14 -4 -4 85.19 5.92
 14 -4 -4 91.44 5.83
 14 4 4 79.94 5.87
 15 4 -4 -2.19 1.75
 15 4 -4 2.34 2.13
 15 4 -4 1.8 1.87
 15 -4 -4 -0.07 1.61
 15 -4 -4 -1.36 1.74
 15 -4 -4 -1.54 1.77
 15 4 4 1.88 1.91
 15 4 4 -0.1 1.74
 0 5 4 0.28 0.34
 0 5 4 -0.07 0.3
 0 -5 4 0 0.25
 0 5 -4 -0.4 0.19
 0 -5 -4 0.17 0.38
 0 5 4 -0.3 0.27
 0 5 -4 -0.27 0.2
 0 5 -4 -0.14 0.27
 0 -5 -4 0.36 0.37
 1 5 -4 33.28 1.82
 -1 5 4 37.55 1.98
 1 5 -4 34.59 1.81
 1 5 -4 33.95 1.78
 1 -5 4 34.73 1.74
 -1 5 4 34.24 1.89
 1 -5 4 34.86 1.72
 -1 5 4 34.91 1.91
 -1 -5 -4 34.52 1.93
 1 -5 -4 35.92 1.93
 -1 5 -4 38.11 1.78
 1 5 4 37.67 2.01
 -1 5 -4 35.47 1.75
 1 -5 -4 38.02 1.94
 1 5 4 33.64 1.91
 -1 5 -4 37.13 1.81
 2 5 -4 7.4 0.79
 2 -5 4 7.65 0.7
 -2 5 4 7.67 0.84
 2 -5 4 6.52 0.66
 2 -5 4 7.09 0.74
 -2 -5 -4 6.53 0.83
 2 5 -4 6.78 0.74
 -2 5 4 6.7 0.81
 2 -5 4 5.95 0.67
 2 5 -4 7.54 0.79
 2 5 4 7.67 0.87
 -2 5 -4 7.61 0.69
 2 -5 -4 8.02 0.86
 2 5 4 7.26 0.9
 2 -5 -4 7.99 0.85
 -2 5 -4 8.36 0.76
 -2 -5 4 7.14 0.71
 2 5 4 9.17 0.94
 3 -5 4 24.3 1.47
 3 5 -4 23.96 1.57
 3 5 -4 21.71 1.49
 3 -5 4 23.1 1.44
 -3 5 4 22.96 1.55
 3 -5 4 25.66 1.46
 3 5 -4 24.99 1.59
 -3 -5 -4 24.57 1.64
 3 -5 4 21.26 1.45
 -3 5 -4 24.77 1.48
 3 -5 -4 22.84 1.57
 3 -5 -4 19.65 1.49
 3 5 4 23.49 1.66
 -3 -5 4 26.77 1.54
 3 5 4 22.87 1.65
 3 -5 -4 27.84 1.66
 3 5 4 26.3 1.71
 4 5 -4 0.52 0.37
 4 -5 4 0.06 0.44
 4 -5 4 0.15 0.37
 4 5 -4 0.85 0.41
 -4 -5 -4 -0.24 0.37
 -4 5 4 0.11 0.37
 4 -5 4 0.17 0.4
 4 5 -4 -0.15 0.31
 4 -5 4 -0.05 0.37
 4 5 4 0.08 0.45
 4 5 4 0.09 0.38
 4 -5 -4 0.3 0.44
 4 -5 -4 -0.02 0.37
 4 -5 -4 0.02 0.37
 4 -5 -4 0.03 0.42
 -4 -5 4 0.15 0.38
 -4 5 -4 -0.01 0.33
 4 5 4 0.47 0.47
 5 -5 4 -0.11 0.44
 5 -5 4 0.21 0.48
 5 5 -4 -0.48 0.39
 5 -5 4 0.17 0.41
 5 5 -4 0.08 0.41
 5 -5 4 0 0.45
 -5 -5 -4 -0.13 0.42
 5 5 -4 0.28 0.44
 -5 5 4 0.65 0.49
 -5 5 -4 0.1 0.45
 5 5 4 0.49 0.56
 5 -5 -4 0.07 0.38
 5 -5 -4 -0.35 0.43
 5 -5 -4 0.34 0.5
 5 -5 -4 0.25 0.47
 -5 -5 4 0.1 0.44
 5 5 4 -0.38 0.51
 5 5 4 0.05 0.43
 6 5 -4 3.58 0.95
 -6 5 4 4.95 0.97
 6 -5 4 5.13 1.01
 6 5 -4 4.23 0.94
 6 -5 4 5.3 1.01
 6 -5 4 3.89 0.89
 6 -5 4 6.18 1.09
 -6 -5 -4 4.11 0.95
 -6 5 -4 4.57 0.91
 -6 -5 4 5.37 0.98
 6 -5 -4 5.62 1.06
 6 5 4 3.44 0.96
 6 5 4 7.67 1.29
 6 -5 -4 7.08 1.18
 6 -5 -4 5.95 1.09
 6 5 4 5.38 1.09
 6 -5 -4 4.4 0.93
 7 5 -4 4.11 1.08
 -7 -5 -4 5.37 1.08
 -7 5 4 3.44 0.95
 7 -5 4 2.99 0.97
 7 -5 4 3.29 0.97
 7 5 -4 3.77 1.01
 7 -5 4 3.3 0.94
 7 5 4 2.93 0.97
 -7 5 -4 2.34 0.89
 7 5 4 3.72 1.09
 7 -5 -4 3.76 1.01
 7 -5 -4 5.2 1.15
 7 -5 -4 3.49 0.98
 7 5 4 0.94 0.8
 7 -5 -4 2.89 0.88
 -7 -5 4 3.96 0.95
 8 5 -4 3.9 1.07
 8 -5 4 4.14 1.15
 -8 -5 -4 5.21 1.2
 8 5 -4 4.28 1.12
 8 -5 4 5.99 1.34
 8 -5 4 2.72 1
 8 5 -4 6.02 1.28
 -8 5 4 5.46 1.2
 8 -5 -4 5.13 1.14
 8 5 4 5.89 1.28
 8 5 4 4.09 1.15
 8 -5 -4 4.14 1.19
 -8 5 -4 2.57 0.82
 8 -5 -4 4.88 1.11
 8 5 4 3.45 1.08
 8 -5 -4 4.18 1.11
 9 5 -4 1.71 0.85
 9 5 -4 2.74 1.05
 -9 -5 -4 0.67 0.71
 9 -5 4 2.19 1
 9 -5 4 2.11 0.96
 9 5 -4 2.9 1.01
 -9 5 4 1.78 0.87
 9 -5 4 1.27 0.87
 9 5 4 1.68 1
 9 -5 -4 1.5 0.8
 9 5 4 2.83 0.99
 9 -5 -4 1.56 0.83
 9 -5 -4 2.15 0.95
 -9 5 -4 1.09 0.77
 9 -5 -4 0.33 0.71
 9 5 4 2.46 1.08
 -10 -5 -4 -0.69 0.73
 10 -5 4 -0.64 0.81
 -10 5 4 1.11 0.79
 10 -5 4 -0.3 0.81
 10 -5 4 -0.23 0.79
 10 5 -4 -0.06 0.91
 10 5 -4 -0.21 0.84
 10 5 -4 0.65 0.82
 10 5 4 -0.27 0.77
 10 -5 -4 -0.77 0.62
 10 -5 -4 -0.4 0.71
 -10 5 -4 0.38 0.8
 10 -5 -4 0.15 0.93
 10 5 4 0.42 0.83
 10 5 4 0.21 0.85
 11 -5 4 10.4 1.85
 11 5 -4 12.04 2.17
 11 5 -4 7.67 1.72
 11 5 -4 9.75 1.98
 -11 -5 -4 10.57 1.81
 11 -5 4 9.28 1.84
 11 5 4 12.6 2.17
 11 -5 -4 9.91 1.81
 11 -5 -4 9.28 1.83
 11 -5 -4 12.07 1.95
 -11 5 -4 10.58 1.83
 11 5 4 11.15 2.09
 11 5 4 9.78 2.05
 12 5 -4 2.25 1.41
 12 5 -4 0.47 1.25
 12 -5 4 2.67 1.29
 12 5 -4 3.62 1.57
 12 -5 4 3.64 1.33
 12 -5 -4 3.58 1.48
 12 5 4 2.84 1.27
 12 5 4 4.11 1.67
 12 5 4 2.99 1.4
 12 -5 -4 2.59 1.51
 -12 5 -4 4.65 1.44
 13 -5 4 5.66 1.78
 13 5 -4 7.46 1.88
 13 5 -4 7.96 2.12
 13 5 -4 1.63 1.58
 13 5 4 5.61 1.88
 13 -5 -4 4.19 1.67
 -13 5 -4 5.08 1.77
 13 -5 -4 5.3 1.92
 13 5 4 10.34 2.26
 13 -5 -4 10.79 2.24
 13 -5 -4 5.44 1.74
 14 5 -4 -0.23 1.43
 14 5 -4 -0.33 1.41
 14 5 -4 1.14 1.4
 14 5 4 0.91 1.49
 -14 5 -4 0.38 1.24
 14 -5 -4 -1.15 1.35
 14 -5 -4 0.15 1.4
 14 -5 -4 -0.34 1.28
 14 5 4 -0.09 1.66
 14 -5 -4 -0.5 1.35
 15 5 -4 2.92 2.02
 15 5 -4 5.01 2.22
 15 -5 -4 4.47 1.97
 15 -5 -4 1.62 1.66
 15 5 4 3.21 2.36
 15 -5 -4 3.22 2.12
 15 5 4 3.53 1.96
 0 -6 -4 292.51 11.62
 0 -6 -4 292.96 11.66
 0 6 -4 283.85 11.52
 0 6 -4 286.94 11.44
 0 -6 4 290.07 11.42
 0 6 -4 291.84 11.37
 0 6 4 292.69 11.6
 0 6 4 288.43 11.68
 0 6 4 286.33 11.53
 1 6 -4 47.3 2.39
 1 -6 4 47.53 2.3
 -1 -6 -4 49.64 2.57
 1 6 -4 46.2 2.43
 -1 6 4 47.48 2.5
 -1 6 4 51.36 2.52
 -1 6 4 52.26 2.6
 1 -6 4 50.69 2.37
 -1 -6 -4 53.23 2.62
 1 6 -4 47.33 2.45
 1 -6 4 47.84 2.31
 1 6 4 51.39 2.55
 -1 -6 4 47.9 2.35
 1 6 4 54.5 2.61
 -1 6 -4 46.47 2.34
 -1 6 -4 48.33 2.36
 -1 6 -4 47.63 2.4
 1 -6 -4 49.99 2.53
 1 -6 -4 53.35 2.59
 -1 -6 4 50.11 2.33
 2 -6 4 274.13 11.01
 -2 6 4 275.41 11.15
 -2 -6 -4 266.75 11.26
 2 6 -4 284.87 11.09
 2 6 -4 280.47 11.24
 2 -6 4 271.88 10.99
 -2 6 4 284.88 11.21
 2 -6 4 278.52 10.81
 2 6 -4 275.4 11.27
 2 -6 4 274.74 11.05
 2 6 4 286.74 11.43
 2 -6 -4 292.75 11.28
 2 6 4 265.72 11.17
 2 -6 -4 271.81 11.21
 -2 6 -4 270.92 10.99
 -2 6 -4 269.19 11.12
 -2 6 -4 279.54 11.06
 -2 -6 4 282.98 11.03
 2 6 4 280.41 11.38
 3 6 -4 27.4 1.76
 3 6 -4 28.19 1.8
 -3 6 4 27.8 1.78
 3 6 -4 27.01 1.78
 -3 -6 -4 28.75 1.86
 3 -6 4 29.44 1.7
 3 -6 4 28.22 1.62
 3 -6 4 30.6 1.71
 3 -6 4 27.49 1.7
 3 -6 -4 26.99 1.78
 3 -6 -4 25.5 1.76
 3 6 4 25.7 1.84
 -3 -6 4 29.13 1.68
 3 6 4 30.97 1.96
 -3 6 -4 27.92 1.7
 3 6 4 30.91 1.95
 -4 6 4 94.4 4.46
 4 -6 4 93.49 4.36
 4 6 -4 92.85 4.47
 -4 -6 -4 92.33 4.53
 4 6 -4 93.52 4.56
 4 -6 4 91.38 4.33
 4 -6 4 100.74 4.39
 4 6 -4 96.44 4.58
 4 -6 4 92.19 4.26
 4 6 4 96.87 4.68
 4 -6 -4 92.89 4.51
 -4 -6 4 99.46 4.42
 4 -6 -4 93.13 4.4
 4 -6 -4 91.05 4.45
 -4 6 -4 94.23 4.38
 4 -6 -4 102.32 4.55
 4 6 4 90.78 4.53
 -5 -6 -4 5.83 1.03
 5 -6 4 3.64 0.8
 5 -6 4 4.67 0.9
 5 6 -4 3.81 0.81
 -5 6 4 4.02 0.86
 5 6 -4 2.73 0.8
 5 -6 4 2.94 0.74
 5 -6 4 3.15 0.73
 5 -6 -4 4.2 0.9
 5 6 4 3.39 0.95
 5 6 4 3 0.87
 -5 -6 4 5.07 0.92
 5 -6 -4 2 0.7
 -5 6 -4 2.69 0.76
 5 -6 -4 4.1 0.9
 5 6 4 2.81 0.85
 5 -6 -4 2.74 0.8
 -6 6 4 0.93 0.67
 6 -6 4 0.56 0.64
 6 -6 4 2.05 0.69
 6 -6 4 1.84 0.76
 6 6 -4 2.04 0.81
 -6 -6 -4 0.91 0.74
 6 -6 4 2.51 0.77
 6 6 4 1.39 0.76
 -6 -6 4 1.6 0.75
 -6 6 -4 1.89 0.7
 6 -6 -4 3.31 0.92
 6 -6 -4 2.24 0.81
 6 -6 -4 1.11 0.71
 6 6 4 3.13 0.97
 6 6 4 2.39 0.82
 6 -6 -4 1.91 0.8
 7 -6 4 22.12 1.9
 7 6 -4 21.64 2.07
 7 6 -4 23.14 2.03
 7 -6 4 26.99 2.02
 -7 -6 -4 21.07 1.93
 7 -6 4 19.73 1.93
 -7 6 4 24.95 2.04
 7 -6 4 23.15 1.89
 -7 -6 4 21.34 1.92
 -7 6 -4 22.01 1.89
 7 6 4 17.05 1.97
 7 6 4 20.17 2.06
 7 -6 -4 19.98 1.97
 7 -6 -4 21.82 1.97
 7 -6 -4 20.48 1.94
 7 -6 -4 20.93 1.9
 7 6 4 24.1 2.12
 -8 6 4 31.54 2.54
 8 6 -4 36.56 2.77
 8 6 -4 36.45 2.83
 8 -6 4 33.26 2.58
 8 -6 4 32.05 2.57
 -8 -6 -4 39.36 2.81
 8 6 -4 40.54 2.97
 8 -6 -4 40.83 2.83
 8 6 4 41.03 2.97
 8 6 4 36.25 2.82
 -8 6 -4 35.11 2.6
 8 -6 -4 32.7 2.62
 8 6 4 35.94 2.81
 8 -6 -4 41.67 2.82
 8 -6 -4 33.32 2.69
 -9 -6 -4 21.1 2.07
 9 -6 4 24.55 2.28
 9 6 -4 23.08 2.26
 9 6 -4 19.59 2.21
 -9 6 4 19.15 2.02
 9 6 -4 19.53 2.11
 9 -6 4 18.93 2.07
 9 -6 4 21.57 2.03
 -9 6 -4 15.94 1.83
 9 -6 -4 15.72 1.87
 9 -6 -4 18.17 1.98
 9 -6 -4 19.78 2.13
 9 -6 -4 19.22 2.01
 9 6 4 19.33 2.13
 9 6 4 18.27 2.15
 9 6 4 19.97 2.08
 10 6 -4 47.41 3.75
 -10 -6 -4 49.77 3.59
 10 6 -4 52.08 3.84
 10 6 -4 57.56 3.88
 10 -6 4 55.19 3.67
 -10 6 4 56.14 3.64
 10 -6 -4 50.78 3.6
 10 -6 -4 54.27 3.75
 -10 6 -4 53.62 3.61
 10 6 4 52.37 3.77
 10 -6 -4 50.97 3.63
 10 6 4 56.07 4.04
 10 6 4 47.81 3.73
 10 -6 -4 50.51 3.7
 11 6 -4 0.1 1.03
 11 6 -4 2.08 1.47
 11 -6 4 1.27 0.98
 11 6 -4 1.78 1.17
 -11 -6 -4 -0.81 0.86
 11 -6 4 1.45 1.02
 11 -6 4 2.31 1.21
 11 -6 -4 1.7 1.01
 11 -6 -4 2.64 1.27
 11 -6 -4 2.51 1.18
 11 6 4 2.25 1.14
 11 6 4 2.24 1.22
 -11 6 -4 0.43 0.89
 11 6 4 1.41 1.22
 12 6 -4 78.81 5.26
 12 6 -4 82.35 5.48
 12 6 -4 81.12 5.4
 12 -6 4 76.61 5.05
 12 6 4 74.16 5.32
 12 -6 -4 82.06 5.28
 12 6 4 73.74 5.16
 -12 6 -4 78.9 5.08
 12 6 4 82.52 5.31
 12 -6 -4 67.59 4.88
 13 6 -4 1.41 1.48
 13 6 -4 0.38 1.36
 13 6 -4 -1.44 1.21
 -13 6 -4 1.49 1.27
 13 6 4 -0.14 1.22
 13 6 4 0.48 1.36
 13 6 4 0.6 1.15
 13 -6 -4 0.1 1.23
 13 -6 -4 -0.77 1.24
 13 -6 -4 -1.07 1.13
 14 6 -4 65.94 5.59
 14 6 -4 70.98 5.64
 14 6 -4 79.8 5.72
 14 6 4 83.46 5.85
 14 -6 -4 81.71 5.57
 14 6 4 69.1 5.57
 14 -6 -4 72.5 5.52
 -14 6 -4 84.61 5.64
 15 6 -4 -0.64 1.76
 15 -6 -4 -1.19 1.52
 15 6 4 -0.72 1.69
 15 6 4 0.42 1.54
 15 -6 -4 0.69 1.75
 0 7 -4 -0.09 0.27
 0 -7 4 0.02 0.3
 0 7 -4 0.52 0.32
 0 -7 4 0.09 0.32
 0 7 4 0.4 0.37
 0 -7 -4 0.05 0.34
 0 -7 -4 -0.24 0.35
 0 7 4 -0.15 0.32
 0 7 4 0.06 0.37
 0 7 -4 0.4 0.32
 -1 7 4 0.7 0.44
 1 -7 4 0.56 0.34
 1 7 -4 0.47 0.37
 -1 -7 -4 1.74 0.57
 -1 -7 -4 0.69 0.46
 -1 7 4 0.04 0.38
 1 -7 4 -0.23 0.34
 -1 7 4 -0.07 0.39
 1 7 -4 -0.17 0.29
 1 7 -4 0.38 0.33
 -1 7 -4 0.63 0.34
 1 7 4 0.53 0.45
 -1 -7 4 0.02 0.35
 1 -7 -4 0.4 0.42
 1 7 4 0.11 0.43
 -1 7 -4 0.69 0.35
 -1 -7 4 0.33 0.33
 1 -7 -4 0.37 0.43
 1 7 4 0.04 0.38
 -1 7 -4 0.26 0.3
 -2 7 4 -0.14 0.36
 2 -7 4 -0.57 0.29
 2 7 -4 0.49 0.34
 2 -7 4 0.35 0.39
 -2 7 4 0.16 0.43
 -2 7 4 0.88 0.45
 -2 -7 -4 0.16 0.41
 2 -7 4 0.27 0.33
 2 7 -4 1.05 0.43
 2 7 -4 0.63 0.35
 2 -7 4 0.5 0.37
 2 7 4 0.52 0.45
 -2 7 -4 0.46 0.35
 -2 -7 4 0.46 0.4
 2 7 4 0.44 0.44
 2 -7 -4 0.56 0.45
 2 -7 -4 0.16 0.39
 2 7 4 0.73 0.48
 -2 7 -4 0.29 0.37
 -2 7 -4 0.72 0.32
 3 -7 4 9.7 1
 -3 7 4 7.92 1.01
 3 -7 4 6.87 0.84
 3 -7 4 9.73 0.93
 3 7 -4 8.44 1
 3 7 -4 7.89 0.92
 -3 -7 -4 9.42 1.05
 3 7 -4 6.82 0.93
 3 -7 4 7.99 0.85
 -3 7 -4 9.25 0.94
 3 7 4 8.14 1.07
 3 7 4 5.78 0.99
 -3 -7 4 9.61 0.91
 3 -7 -4 9.8 1.06
 3 -7 -4 9.21 1.01
 -3 7 -4 6.16 0.83
 3 7 4 6.38 1.07
 4 -7 4 0.97 0.51
 -4 7 4 0.64 0.48
 -4 -7 -4 1.75 0.68
 4 7 -4 0.86 0.49
 4 7 -4 0.42 0.42
 4 -7 4 1.15 0.56
 4 -7 4 0.61 0.53
 4 7 -4 1.06 0.47
 4 -7 4 1.66 0.55
 4 7 4 0.74 0.56
 4 7 4 1.18 0.62
 4 7 4 0.67 0.59
 4 -7 -4 1.03 0.55
 -4 7 -4 1.31 0.57
 4 -7 -4 1.07 0.59
 4 -7 -4 0.31 0.53
 -4 -7 4 0.36 0.49
 5 -7 4 31.71 2.1
 5 -7 4 32.28 2.15
 5 7 -4 34.36 2.3
 5 -7 4 31.98 2.14
 5 -7 4 29.46 2.08
 -5 7 4 36.18 2.29
 5 7 -4 37.84 2.38
 -5 -7 -4 27.33 2.17
 5 7 4 35.07 2.36
 5 7 4 30.1 2.34
 5 7 4 34.03 2.42
 -5 -7 4 33.12 2.2
 5 -7 -4 33.46 2.22
 5 -7 -4 37.62 2.34
 5 -7 -4 36.03 2.32
 5 -7 -4 30.07 2.21
 -5 7 -4 33.74 2.22
 -6 -7 -4 17.11 1.61
 -6 7 4 14.41 1.56
 6 7 -4 18.14 1.71
 6 -7 4 17.35 1.61
 6 -7 4 18.26 1.59
 6 -7 4 15.26 1.55
 6 -7 4 14.75 1.49
 6 -7 -4 14.28 1.58
 6 -7 -4 14 1.57
 -6 -7 4 16.46 1.53
 -6 7 -4 14.74 1.56
 6 -7 -4 14.2 1.47
 6 7 4 17.91 1.84
 6 7 4 14.61 1.69
 6 -7 -4 12.79 1.48
 6 7 4 14.48 1.69
 7 7 -4 0.14 0.54
 -7 7 4 -0.14 0.65
 7 -7 4 -0.85 0.69
 7 -7 4 -0.37 0.59
 -7 -7 -4 -0.17 0.67
 7 7 4 -0.21 0.68
 -7 7 -4 0.39 0.6
 7 7 4 -0.58 0.67
 7 -7 -4 -0.29 0.69
 7 7 4 -0.76 0.66
 7 -7 -4 0.02 0.7
 7 -7 -4 0.67 0.53
 7 -7 -4 0.26 0.63
 -8 7 4 7.94 1.45
 -8 -7 -4 9.02 1.64
 8 -7 4 7.89 1.44
 8 7 -4 7.47 1.44
 8 -7 4 7.32 1.33
 8 7 -4 6.59 1.46
 8 7 4 8.69 1.58
 -8 7 -4 8.03 1.38
 8 -7 -4 7.89 1.42
 8 -7 -4 7.72 1.52
 8 7 4 5.77 1.35
 8 -7 -4 9.45 1.55
 8 -7 -4 8.21 1.51
 8 7 4 6.89 1.45
 9 7 -4 6.45 1.47
 -9 -7 -4 3.29 1.12
 9 -7 4 5.19 1.33
 -9 7 4 5.61 1.29
 9 7 -4 1.93 1.03
 9 -7 4 3.77 1.08
 9 7 -4 2.84 1.17
 9 7 4 4.63 1.31
 9 -7 -4 3.63 1.12
 9 7 4 6.1 1.41
 9 7 4 3.56 1.19
 -9 7 -4 4.37 1.07
 9 -7 -4 6.31 1.37
 9 -7 -4 5.45 1.29
 9 -7 -4 2.19 1.01
 10 7 -4 2.48 1.22
 -10 7 4 2.78 1.08
 10 7 -4 0.79 0.94
 10 -7 4 3.85 1.2
 10 7 -4 1.5 1.1
 -10 -7 -4 2.25 0.99
 10 7 4 2.27 1.16
 10 -7 -4 2.64 1.17
 10 -7 -4 1.97 1.06
 10 -7 -4 2.59 1.11
 10 -7 -4 1.37 0.96
 10 7 4 1.73 1.11
 -10 7 -4 1.09 0.88
 10 7 4 3.43 1.26
 11 7 -4 11.7 2.11
 11 -7 4 6.82 1.55
 11 7 -4 7.62 1.83
 11 7 -4 14.76 2.35
 -11 7 -4 6.78 1.49
 11 -7 -4 10.07 1.93
 11 -7 -4 6.38 1.6
 11 7 4 9.28 1.83
 11 7 4 10.06 1.97
 11 7 4 6.47 1.7
 12 7 -4 0.36 1.26
 12 -7 4 -1.79 1
 12 7 -4 -0.78 1.12
 12 7 -4 -0.82 1.05
 -12 7 -4 -1.63 0.84
 12 7 4 -1.44 0.97
 12 -7 -4 -0.47 0.94
 12 -7 -4 -0.24 1.11
 12 7 4 -0.37 1.17
 12 7 4 -0.49 1.1
 13 7 -4 6.77 2.09
 13 7 -4 6.73 1.97
 13 7 -4 7.67 2.15
 -13 7 -4 7.29 1.97
 13 -7 -4 8.41 2.07
 13 -7 -4 10.4 2.15
 13 7 4 4.3 1.9
 13 7 4 5.54 1.78
 13 7 4 6.26 2
 14 7 -4 -0.71 1.39
 14 7 -4 1.15 1.74
 14 7 -4 0.84 1.8
 14 7 4 2.34 1.52
 14 -7 -4 -0.01 1.4
 14 -7 -4 -0.71 1.22
 14 7 4 2.53 1.7
 -14 7 -4 0.9 1.36
 14 -7 -4 0.81 1.53
 15 -7 -4 5.99 2.23
 15 7 4 3.41 2.09
 15 7 4 7.04 2.34
 15 -7 -4 6.05 2.2
 0 8 4 201.91 8.63
 0 8 -4 202.41 8.48
 0 -8 -4 205.07 8.68
 0 8 4 199.99 8.75
 0 -8 4 207.95 8.45
 0 8 -4 202.99 8.6
 0 8 -4 213 8.54
 0 -8 -4 213.01 8.73
 0 -8 4 214.81 8.49
 0 8 4 207.78 8.67
 1 8 -4 21.47 1.52
 -1 8 4 22.06 1.59
 -1 8 4 23.63 1.7
 1 8 -4 19.92 1.44
 1 -8 4 22.61 1.46
 1 -8 4 20.8 1.39
 -1 8 4 22.84 1.58
 -1 -8 -4 21.06 1.62
 -1 -8 -4 25.49 1.67
 1 8 -4 20.68 1.48
 -1 8 -4 21.96 1.49
 1 8 4 23.75 1.66
 -1 -8 4 21.2 1.45
 1 8 4 23.15 1.68
 1 8 4 22.84 1.64
 1 -8 -4 21.83 1.57
 1 -8 -4 21.92 1.61
 -1 -8 4 24.43 1.45
 -1 8 -4 21.42 1.46
 -1 8 -4 22.03 1.46
 2 8 -4 230.43 9.89
 2 -8 4 228.91 9.62
 2 8 -4 238.27 9.76
 2 -8 4 237.86 9.46
 2 -8 4 229.1 9.63
 -2 -8 -4 245.95 9.94
 2 8 -4 235.15 9.89
 -2 8 4 238.35 9.98
 2 -8 4 233.45 9.69
 -2 8 4 238.65 9.87
 2 8 4 259.73 10.16
 -2 8 -4 238.79 9.73
 2 -8 -4 238.4 9.92
 2 8 4 240.15 9.91
 2 8 4 236.99 10.05
 -2 8 -4 242.28 9.7
 2 -8 -4 226 9.85
 -2 8 -4 237.84 9.82
 -2 -8 4 235.93 9.67
 3 -8 4 43.67 2.32
 3 8 -4 40.33 2.42
 -3 -8 -4 41.09 2.51
 3 -8 4 37.88 2.27
 -3 8 4 38.84 2.46
 -3 8 4 40.12 2.41
 3 -8 4 43.45 2.24
 3 8 -4 40.15 2.38
 3 -8 4 41.33 2.31
 3 8 -4 37.96 2.39
 3 8 4 41.25 2.64
 -3 8 -4 38.38 2.3
 3 -8 -4 44.33 2.5
 3 -8 -4 40.98 2.45
 3 8 4 40.51 2.54
 3 8 4 42.95 2.62
 -3 -8 4 41.94 2.31
 -3 8 -4 44.95 2.38
 4 -8 4 166.19 6.96
 4 8 -4 153.16 7.14
 -4 -8 -4 158.72 7.16
 4 -8 4 149.27 6.76
 -4 8 4 163.67 7.12
 4 -8 4 157.82 6.92
 4 8 -4 153.93 7.03
 4 -8 4 159.26 6.94
 4 8 4 155.85 7.16
 -4 8 -4 170.8 7.06
 -4 -8 4 167.55 7.02
 4 8 4 150.87 7.26
 4 8 4 160.36 7.3
 4 -8 -4 159.44 7.1
 4 -8 -4 165.73 7.16
 4 -8 -4 159.44 7.13
 5 -8 4 12.91 1.39
 5 8 -4 14.5 1.47
 -5 -8 -4 12.18 1.42
 5 -8 4 16.05 1.49
 5 -8 4 11.24 1.29
 5 -8 4 12.04 1.38
 -5 8 4 10.83 1.38
 5 8 4 15.34 1.66
 5 -8 -4 10.88 1.38
 5 -8 -4 12.85 1.38
 5 -8 -4 15.68 1.54
 -5 -8 4 16.81 1.47
 5 8 4 13.44 1.62
 -5 8 -4 17.3 1.54
 5 -8 -4 13.86 1.44
 5 8 4 12.99 1.47
 -6 8 4 0.44 0.67
 -6 -8 -4 2.28 0.84
 6 -8 4 0.7 0.66
 6 -8 4 0.66 0.67
 6 8 -4 1.07 0.69
 6 -8 -4 0.53 0.63
 6 8 4 1.77 0.88
 6 -8 -4 0.63 0.72
 6 8 4 1.4 0.83
 6 -8 -4 0.82 0.74
 6 -8 -4 2.2 0.83
 -6 8 -4 1.96 0.78
 6 8 4 -0.16 0.68
 -7 -8 -4 29.42 2.37
 7 -8 4 30.75 2.34
 -7 8 4 32.25 2.39
 7 -8 4 29.73 2.29
 7 8 -4 27.89 2.39
 -7 8 -4 33.95 2.39
 7 -8 -4 26.28 2.29
 7 8 4 26.31 2.39
 7 8 4 30.82 2.51
 7 -8 -4 32.19 2.42
 7 -8 -4 32.19 2.45
 7 -8 -4 28.39 2.38
 7 8 4 28.84 2.48
 -8 -8 -4 22.87 2.16
 8 8 -4 21.52 2.2
 8 -8 4 24.11 2.26
 8 -8 4 25.45 2.09
 8 8 -4 22.72 2.27
 -8 8 4 19.83 2.03
 8 8 4 24.03 2.3
 8 -8 -4 23.18 2.24
 8 -8 -4 24.61 2.25
 -8 8 -4 26.82 2.22
 8 8 4 22.24 2.32
 8 -8 -4 25.98 2.3
 8 8 4 20.06 2.19
 8 -8 -4 21.86 2.14
 9 8 -4 34.64 2.93
 9 8 -4 33.2 2.92
 9 -8 4 30.96 2.51
 9 8 -4 27.65 2.64
 -9 8 4 33.02 2.65
 -9 -8 -4 30.07 2.64
 9 8 4 33.8 2.91
 9 -8 -4 31.68 2.7
 -9 8 -4 27.41 2.48
 9 8 4 29.72 2.69
 9 8 4 27.62 2.83
 9 -8 -4 33.99 2.79
 9 -8 -4 25.71 2.43
 9 -8 -4 34.93 2.67
 10 8 -4 57.14 4.12
 10 -8 4 62.1 3.86
 10 8 -4 59.61 4.16
 -10 8 4 56.01 3.8
 10 8 -4 55.54 3.99
 -10 -8 -4 55.36 3.8
 10 8 4 53.72 4.06
 10 -8 -4 61.58 4.02
 10 8 4 55.11 4.11
 -10 8 -4 49.67 3.68
 10 -8 -4 56.52 3.84
 10 -8 -4 52.3 3.75
 10 8 4 46.73 3.71
 10 -8 -4 46.69 3.64
 11 8 -4 10.55 2.24
 11 8 -4 8.55 1.91
 11 -8 4 6.21 1.6
 11 8 -4 13.37 2.3
 11 8 4 11.29 2.07
 11 8 4 10.72 2.17
 11 -8 -4 8.3 1.74
 11 -8 -4 12.04 2.13
 11 8 4 6.62 1.61
 -11 8 -4 10.79 1.89
 12 8 -4 70.56 5.28
 12 8 -4 76.75 5.46
 12 -8 4 80.99 5.06
 12 8 -4 73.37 5.39
 12 8 4 79.76 5.5
 12 -8 -4 82.78 5.32
 -12 8 -4 70.89 4.98
 12 -8 -4 90.96 5.36
 12 8 4 73.98 5.18
 13 8 -4 1.25 1.39
 13 8 -4 -0.82 1.37
 13 8 -4 -0.38 1.24
 13 8 4 0.92 1.57
 13 8 4 0.75 1.48
 13 -8 -4 -1.7 1.3
 13 8 4 -0.72 1.22
 -13 8 -4 -0.48 1.32
 13 -8 -4 0.99 1.3
 14 8 -4 53.77 4.82
 14 8 -4 61.85 5.25
 14 8 -4 50.03 4.7
 14 8 4 52.14 4.83
 14 -8 -4 51.82 4.53
 14 8 4 47.67 4.64
 -14 8 -4 59.49 4.71
 0 9 4 0.14 0.43
 0 9 4 0.08 0.45
 0 9 -4 0.32 0.33
 0 9 4 0.22 0.43
 0 -9 -4 -0.72 0.39
 0 -9 4 0.07 0.34
 0 -9 -4 -0.52 0.4
 0 -9 4 -0.5 0.32
 0 9 -4 0.12 0.41
 0 9 -4 -0.38 0.23
 -1 -9 -4 7.02 1.04
 1 -9 4 7.01 0.87
 1 9 -4 7.5 0.86
 -1 9 4 7.97 0.99
 -1 -9 -4 6.12 1.01
 -1 9 4 9.36 1.19
 1 -9 4 8.19 0.95
 -1 9 4 7.75 1.1
 1 9 -4 8.63 0.97
 -1 9 -4 9.07 0.99
 -1 -9 4 7.78 0.86
 1 -9 -4 7.56 0.98
 1 -9 -4 8.43 1.07
 1 9 4 8.38 1.06
 1 9 4 8.31 1.04
 -1 9 -4 5.93 0.77
 -1 -9 4 6.67 0.92
 -1 9 -4 8.14 0.93
 1 9 4 6.8 1.11
 2 9 -4 1.55 0.57
 2 -9 4 0.96 0.48
 -2 9 4 0.5 0.47
 2 9 -4 0.57 0.42
 -2 9 4 0.39 0.48
 -2 -9 -4 0.43 0.58
 -2 -9 -4 1.28 0.59
 2 -9 4 0.41 0.45
 2 -9 4 -0.24 0.33
 2 9 -4 0.44 0.37
 -2 9 4 0.34 0.48
 2 -9 4 0.25 0.41
 2 -9 -4 2.07 0.69
 -2 9 -4 -0.02 0.34
 -2 9 -4 0.78 0.43
 2 -9 -4 0.34 0.5
 -2 -9 4 1.53 0.55
 -2 -9 4 -0.17 0.36
 2 9 4 -0.09 0.46
 2 9 4 0.3 0.56
 -2 9 -4 0.65 0.48
 2 9 4 0.07 0.47
 3 9 -4 34.66 2.19
 -3 9 4 31.52 2.18
 3 9 -4 35.43 2.25
 3 9 -4 31.95 2.14
 3 -9 4 30.89 1.96
 3 -9 4 32.38 2.05
 3 -9 4 32.47 2.07
 -3 9 4 32.63 2.27
 -3 -9 -4 34.56 2.24
 3 -9 4 33.71 2.1
 3 9 4 40.14 2.47
 3 -9 -4 31.94 2.19
 -3 9 -4 36.95 2.16
 -3 -9 4 37.38 2.15
 -3 9 -4 33.27 2.11
 3 9 4 33.71 2.38
 3 -9 -4 35.22 2.26
 3 9 4 34.06 2.29
 -4 9 4 -0.21 0.45
 4 9 -4 -0.6 0.36
 4 -9 4 0.01 0.51
 4 -9 4 0.61 0.51
 -4 -9 -4 -0.38 0.49
 4 -9 4 -0.04 0.45
 4 9 -4 1.15 0.48
 4 -9 4 0.16 0.51
 4 -9 -4 0.33 0.62
 4 9 4 0.5 0.56
 4 9 4 -0.52 0.57
 4 -9 -4 -0.03 0.49
 -4 9 -4 0.86 0.56
 4 9 4 -0.29 0.55
 4 -9 -4 -0.74 0.53
 -4 -9 4 -0.2 0.54
 5 -9 4 5.13 0.98
 5 9 -4 5.53 1.13
 -5 -9 -4 3.28 0.99
 -5 9 4 4.08 0.98
 5 -9 4 7.52 1.13
 -5 9 -4 5.02 1.02
 5 9 4 4.46 1.03
 5 -9 -4 4.49 0.96
 5 9 4 5.29 1.19
 5 -9 -4 5.05 1.05
 5 -9 -4 4.75 1.05
 5 -9 -4 5.84 1.11
 5 9 4 4 1.11
 -6 9 4 1.02 0.71
 6 9 -4 1.38 0.66
 6 -9 4 1.57 0.81
 -6 -9 -4 1.24 0.76
 6 -9 4 1.76 0.73
 6 -9 -4 -0.15 0.59
 6 -9 -4 0.23 0.67
 6 9 4 2 0.95
 6 -9 -4 2.43 0.84
 6 9 4 0.28 0.67
 -6 9 -4 0.78 0.56
 6 9 4 0.75 0.75
 6 -9 -4 0.71 0.72
 -7 9 4 1.95 0.9
 -7 -9 -4 3.12 1
 7 -9 4 3.5 1.06
 7 9 -4 1.04 0.71
 7 -9 4 2.01 0.93
 7 9 4 2.6 0.99
 7 -9 -4 1.22 0.78
 7 -9 -4 1.67 0.83
 7 -9 -4 1.77 0.8
 7 9 4 1.62 0.88
 7 9 4 3.38 0.98
 7 -9 -4 3.12 1.04
 -7 9 -4 2.27 0.82
 8 9 -4 6.02 1.32
 8 9 -4 3.48 1.19
 -8 9 4 4.96 1.24
 8 -9 4 6.92 1.34
 -8 -9 -4 3.64 1.26
 -8 9 -4 3.3 1.04
 8 -9 -4 8.37 1.47
 8 -9 -4 5.03 1.18
 8 -9 -4 2.98 1.08
 8 9 4 6.12 1.48
 8 9 4 3.86 1.16
 8 9 4 4.62 1.26
 8 -9 -4 4.51 1.23
 9 9 -4 3.63 1.17
 9 9 -4 2.46 1.11
 9 9 -4 1.92 1.02
 -9 -9 -4 1.02 0.77
 -9 9 4 2.24 0.93
 9 -9 4 5.32 1.3
 9 -9 -4 4.26 1.28
 9 -9 -4 3.78 1.27
 9 -9 -4 2.45 1
 -9 9 -4 2.71 1.04
 9 9 4 3.38 1.28
 9 -9 -4 1.69 0.96
 9 9 4 2.42 1.04
 9 9 4 0.51 0.94
 10 9 -4 1.09 0.96
 -10 9 4 -0.51 0.73
 10 -9 4 3.23 1.17
 10 9 -4 1.8 1.14
 10 9 -4 0.65 0.9
 10 9 4 1.53 1.12
 10 9 4 -1.13 0.98
 10 -9 -4 1.68 1.1
 10 -9 -4 0.86 1.03
 10 9 4 1.74 1.19
 -10 9 -4 0.92 0.9
 11 9 -4 8.83 2
 11 9 -4 7.17 1.72
 11 9 -4 8.74 1.92
 11 -9 4 9.69 1.8
 11 9 4 9.2 2.04
 -11 9 -4 7.45 1.71
 11 9 4 6.55 1.88
 11 -9 -4 7.94 1.78
 11 -9 -4 6.48 1.76
 11 9 4 6.56 1.78
 12 -9 4 1.72 1.25
 12 9 -4 3.6 1.64
 12 9 -4 1.77 1.29
 12 9 -4 3.46 1.38
 12 9 4 1.65 1.32
 12 -9 -4 3.46 1.42
 12 9 4 1.36 1.54
 -12 9 -4 2.5 1.25
 12 9 4 4.39 1.56
 12 -9 -4 4.42 1.54
 13 -9 4 6.67 1.92
 13 9 -4 6.92 2.13
 13 9 -4 4.74 1.95
 13 9 -4 9.57 2.39
 -13 9 -4 10.69 2.29
 13 -9 -4 10.03 2.07
 13 9 4 9.78 2.23
 13 -9 -4 6.71 1.87
 13 9 4 9.47 2.43
 13 9 4 8.56 2.22
 14 9 -4 1.97 2
 14 9 -4 -0.58 1.72
 14 9 -4 3.32 1.92
 14 -9 -4 1.88 1.7
 14 9 4 1.26 1.82
 -14 9 -4 2.28 1.58
 14 9 4 6.04 2.16
 0 10 4 42.58 2.58
 0 10 4 42.7 2.55
 0 -10 4 42.81 2.38
 0 -10 -4 37.52 2.45
 0 -10 4 45.6 2.38
 0 10 -4 42.88 2.46
 0 10 4 46.39 2.69
 0 10 -4 39.91 2.38
 0 -10 -4 40.86 2.54
 0 10 -4 39.88 2.4
 1 10 -4 18.12 1.45
 1 -10 4 17.84 1.38
 -1 -10 -4 12.84 1.42
 1 10 -4 16.78 1.39
 -1 10 4 17.86 1.5
 -1 10 4 19.77 1.64
 -1 -10 -4 21.07 1.63
 -1 10 4 17.31 1.62
 1 -10 4 16.9 1.39
 1 10 -4 17.04 1.44
 -1 -10 4 21.58 1.44
 1 -10 -4 16.29 1.45
 -1 10 -4 17.08 1.37
 -1 10 -4 21.1 1.53
 1 10 4 15.93 1.54
 -1 10 -4 14.8 1.32
 -1 -10 4 16.14 1.38
 1 10 4 16.7 1.65
 1 -10 -4 18.96 1.58
 1 10 4 18.29 1.55
 2 10 -4 180.93 7.99
 -2 -10 -4 182.85 8.04
 -2 10 4 185.79 7.98
 -2 10 4 177.2 7.92
 -2 -10 -4 180 7.97
 2 -10 4 180.82 7.7
 2 10 -4 184.07 7.87
 -2 10 4 189.63 8.12
 2 -10 4 183.43 7.7
 2 -10 4 177.26 7.72
 2 -10 -4 179.49 7.98
 -2 -10 4 189.58 7.76
 2 10 4 180.23 8.16
 -2 10 -4 178.82 7.77
 -2 10 -4 180.43 7.9
 -2 10 -4 181.87 7.8
 2 10 4 175.34 7.99
 2 10 4 178.29 8
 -2 -10 4 184.97 7.79
 2 -10 -4 179.75 7.93
 3 -10 4 -0.27 0.5
 3 -10 4 0.07 0.41
 3 -10 4 0.02 0.42
 3 -10 4 1.42 0.59
 -3 10 4 0.63 0.63
 3 10 -4 -0.15 0.29
 -3 -10 -4 -0.37 0.48
 3 10 -4 0.95 0.49
 -3 10 4 -0.17 0.53
 -3 -10 4 0.33 0.44
 3 -10 -4 0.65 0.6
 -3 10 -4 0.28 0.55
 3 10 4 0.26 0.65
 3 10 4 -0.93 0.5
 -3 10 -4 1.49 0.47
 3 10 4 -0.36 0.66
 3 -10 -4 0.08 0.52
 4 -10 4 67.56 3.62
 -4 10 4 67 3.76
 4 -10 4 79.17 3.78
 -4 -10 -4 73.99 3.93
 4 10 -4 65.87 3.81
 4 10 -4 64.78 3.75
 4 10 4 68.61 4.03
 -4 10 -4 72.3 3.74
 4 10 4 71.51 3.94
 4 -10 -4 72.42 3.9
 4 10 4 69.88 4.1
 4 -10 -4 73.29 3.86
 -5 10 4 1 0.72
 -5 -10 -4 1.12 0.77
 5 -10 4 0.88 0.72
 5 -10 4 0.59 0.61
 5 10 -4 0.36 0.57
 5 10 4 0.86 0.76
 5 -10 -4 1.34 0.82
 5 10 4 1.11 0.78
 5 10 4 2.11 0.91
 -5 10 -4 1.63 0.74
 5 -10 -4 0.19 0.67
 5 -10 -4 0.39 0.68
 5 -10 -4 0.65 0.73
 -6 -10 -4 1.35 0.79
 6 -10 4 1.12 0.82
 6 10 -4 1.52 0.69
 -6 10 4 0.2 0.73
 6 -10 4 1.63 0.87
 6 -10 -4 0.34 0.56
 6 10 4 2.58 0.95
 -6 10 -4 1.18 0.64
 6 10 4 2.42 0.94
 6 10 4 0.62 0.64
 6 -10 -4 2.48 0.97
 6 -10 -4 0.65 0.73
 6 -10 -4 1.37 0.75
 7 10 -4 37.22 2.77
 -7 -10 -4 38.82 2.86
 -7 10 4 31.53 2.55
 7 -10 4 30.07 2.44
 -7 10 -4 32.3 2.49
 7 10 4 33 2.84
 7 10 4 31.16 2.6
 7 -10 -4 38.64 2.79
 7 -10 -4 34.38 2.58
 7 -10 -4 34.28 2.65
 7 10 4 33.76 2.78
 -8 10 4 22.25 2.11
 8 10 -4 20.63 2.23
 -8 -10 -4 22.19 2.25
 8 10 -4 22.55 2.24
 8 -10 4 23.25 2.07
 8 10 4 21.29 2.26
 8 10 4 17.29 2.19
 8 -10 -4 19.83 2.08
 8 10 4 18.65 2.17
 8 -10 -4 18.9 2.12
 -8 10 -4 18.94 2.06
 8 -10 -4 22.6 2.2
 8 -10 -4 25.98 2.31
 9 -10 4 30.15 2.57
 -9 10 4 28.31 2.56
 9 10 -4 24.89 2.53
 9 10 -4 26.52 2.69
 9 10 -4 31.55 2.86
 -9 -10 -4 26.99 2.55
 -9 10 -4 32.52 2.62
 9 10 4 30.33 2.9
 9 -10 -4 26.5 2.5
 9 -10 -4 29.77 2.62
 9 10 4 28.39 2.81
 9 -10 -4 22.88 2.38
 9 -10 -4 27.22 2.41
 9 10 4 28.49 2.76
 10 10 -4 47.61 3.76
 -10 10 4 45.17 3.45
 10 10 -4 45.51 3.74
 10 10 -4 43.76 3.7
 10 -10 4 49.11 3.46
 10 -10 -4 48.73 3.56
 10 10 4 50.04 3.77
 10 10 4 40.45 3.72
 10 10 4 53.12 3.95
 10 -10 -4 41.42 3.43
 -10 10 -4 46.14 3.5
 11 10 -4 0.96 1.08
 11 10 -4 -0.13 1.23
 11 10 -4 -0.36 1.15
 11 -10 4 0.83 1.06
 11 10 4 0.24 1.2
 -11 10 -4 -0.18 1.08
 11 10 4 -0.36 1.02
 11 -10 -4 1.04 1.16
 11 10 4 -1.06 1.07
 11 -10 -4 -1.19 0.92
 12 -10 4 58.81 4.19
 12 10 -4 53.39 4.53
 12 10 -4 54.43 4.56
 12 10 -4 61.07 4.82
 -12 10 -4 59.91 4.31
 12 -10 -4 61.49 4.48
 12 10 4 49.87 4.3
 12 10 4 48.17 4.43
 12 -10 -4 54.92 4.23
 12 10 4 63.1 4.81
 13 10 -4 0.99 1.54
 13 -10 4 2.18 1.33
 13 10 -4 -0.34 1.5
 13 10 -4 0.18 1.34
 13 10 4 -0.28 1.45
 13 10 4 2.89 1.69
 -13 10 -4 2.67 1.38
 13 10 4 0.24 1.24
 13 -10 -4 0.27 1.34
 14 10 -4 60.94 5.08
 -14 10 -4 50.72 4.62
 14 -10 -4 45.79 4.43
 14 10 4 56.68 5.03
 14 10 4 52.85 4.96
 0 11 4 -0.79 0.51
 0 -11 -4 -0.11 0.46
 0 11 4 0.15 0.56
 0 11 -4 0 0.28
 0 -11 -4 0.21 0.55
 0 -11 4 0.19 0.44
 0 11 4 0.17 0.49
 0 -11 4 -0.55 0.43
 0 11 -4 -0.69 0.41
 1 11 -4 110.48 5.06
 1 11 -4 111.12 5.09
 -1 11 4 107.55 5.28
 -1 11 4 114.95 5.26
 -1 -11 -4 109.62 5.17
 1 -11 4 101.85 4.93
 -1 -11 -4 116.81 5.3
 1 -11 4 106.75 4.92
 -1 11 -4 103.14 4.99
 -1 -11 4 112.08 4.95
 1 -11 -4 101.23 5.13
 -1 11 -4 106.26 5.02
 1 -11 -4 99.1 5.07
 1 11 4 106.1 5.2
 1 11 4 102.06 5.26
 1 11 4 102.22 5.19
 -1 -11 4 102.07 4.91
 -2 11 4 13.04 1.35
 2 -11 4 12.65 1.26
 2 -11 4 12.38 1.27
 -2 -11 -4 11.2 1.41
 -2 11 4 10.73 1.4
 2 11 -4 13.8 1.3
 -2 -11 -4 11.9 1.34
 2 11 -4 13.82 1.36
 -2 11 4 13.66 1.47
 2 11 4 11.74 1.36
 2 11 4 13.28 1.57
 2 -11 -4 14.58 1.49
 -2 11 -4 13.46 1.27
 2 11 4 11.42 1.41
 -2 11 -4 10.48 1.12
 -2 11 -4 14.27 1.37
 -2 -11 4 10.95 1.19
 2 -11 -4 13.28 1.39
 -3 -11 -4 60.11 3.57
 3 11 -4 64.3 3.57
 3 -11 4 68.43 3.39
 3 -11 4 58.84 3.32
 -3 11 4 60.48 3.6
 -3 11 4 61.67 3.47
 3 11 -4 60.26 3.44
 3 11 4 60.61 3.74
 -3 11 -4 61.49 3.37
 3 -11 -4 63.74 3.55
 3 11 4 65.27 3.69
 -3 11 -4 62.34 3.39
 3 -11 -4 66.98 3.57
 3 11 4 57.15 3.64
 4 -11 4 1.13 0.64
 4 -11 4 0.12 0.59
 -4 11 4 1.14 0.71
 -4 -11 -4 1.95 0.78
 4 -11 -4 0.93 0.68
 4 11 4 0.45 0.67
 4 11 4 0.41 0.75
 4 11 4 0.84 0.75
 4 -11 -4 1.44 0.73
 4 -11 -4 0.96 0.69
 -4 11 -4 1.37 0.65
 5 11 -4 20.12 1.78
 -5 11 4 15.8 1.7
 -5 -11 -4 19.52 1.92
 5 -11 4 16.57 1.67
 5 -11 4 19.28 1.79
 5 -11 -4 16.64 1.74
 5 -11 -4 19.41 1.93
 5 11 4 17.64 1.85
 5 11 4 15.99 1.77
 -5 11 -4 15.71 1.64
 5 -11 -4 15.42 1.65
 5 -11 -4 18.56 1.85
 5 11 4 15.96 1.89
 6 11 -4 -0.03 0.6
 -6 11 4 -0.71 0.6
 6 -11 4 0.43 0.65
 -6 -11 -4 -0.51 0.6
 -6 11 -4 0.08 0.6
 6 11 4 0.15 0.65
 6 -11 -4 0.04 0.61
 6 -11 -4 0.04 0.72
 6 11 4 -0.82 0.52
 6 -11 -4 0.68 0.66
 6 11 4 -0.82 0.56
 6 -11 -4 -0.13 0.7
 7 11 -4 1.28 0.82
 7 -11 4 1.84 0.79
 -7 11 4 3.89 1.07
 -7 -11 -4 2.62 1.15
 7 -11 -4 0.3 0.86
 -7 11 -4 2.95 0.93
 7 11 4 1.54 1.02
 7 -11 -4 0.47 0.76
 7 11 4 1.53 0.98
 7 11 4 1.31 0.92
 7 -11 -4 2.92 0.97
 7 -11 -4 2.48 0.95
 -8 11 4 0.47 0.79
 -8 -11 -4 1.62 1.03
 8 -11 4 0.96 0.77
 8 11 -4 4.65 1.29
 8 -11 -4 3.44 1.09
 8 -11 -4 1.99 1.1
 8 -11 -4 1.01 0.87
 8 -11 -4 3.3 1.11
 8 11 4 1.93 0.97
 -8 11 -4 2.66 1.01
 8 11 4 -0.01 0.83
 8 11 4 1.3 0.95
 -9 11 4 10.89 1.8
 9 11 -4 8.59 1.7
 9 -11 4 13.41 1.93
 9 11 -4 4.89 1.49
 9 11 4 9.64 1.93
 -9 11 -4 9.21 1.71
 9 -11 -4 11.53 1.85
 9 11 4 17.52 2.07
 9 -11 -4 9.3 1.75
 9 11 4 9.45 1.87
 -10 11 4 -0.46 0.9
 10 11 -4 1.69 1.17
 10 -11 4 1.17 1.04
 10 11 -4 0.21 1.13
 10 11 -4 -0.16 0.82
 -10 11 -4 0.15 0.77
 10 11 4 1.18 1.04
 10 11 4 0.49 1.14
 10 11 4 1.58 1.33
 10 -11 -4 0.93 0.95
 10 -11 -4 1.11 1.05
 11 11 -4 4.92 1.71
 11 11 -4 9.07 2.15
 11 -11 4 10.27 1.97
 11 11 -4 10.06 2.07
 11 11 4 7.66 1.93
 11 11 4 11.07 2.4
 11 -11 -4 9.62 1.99
 -11 11 -4 9.92 2
 11 -11 -4 13.32 2.33
 11 11 4 8.46 1.94
 12 11 -4 0.01 1.22
 12 11 -4 1.21 1.32
 12 -11 4 -0.17 1.15
 12 11 -4 0.83 1.27
 12 11 4 1.23 1.24
 -12 11 -4 0.64 1.22
 12 -11 -4 0.43 1.33
 12 11 4 0.56 1.35
 12 11 4 -2.04 1.2
 13 11 -4 10.17 2.47
 13 11 -4 13.53 2.63
 13 11 -4 17.52 3.09
 13 -11 4 11.48 2.23
 -13 11 -4 12.91 2.42
 13 11 4 6.2 2.29
 13 11 4 8.35 2.3
 13 -11 -4 5.95 1.95
 13 11 4 5.17 2.1
 14 -11 4 1.19 1.82
 -14 11 -4 -1.77 1.54
 14 11 4 -0.18 1.76
 0 12 4 156.51 7.7
 0 -12 -4 178.04 7.77
 0 12 -4 169.38 7.63
 0 12 4 178.44 7.75
 0 12 4 174.62 7.73
 0 -12 4 175.44 7.48
 0 12 -4 162.41 7.45
 0 -12 -4 164.62 7.62
 0 12 -4 171.32 7.52
 -1 12 4 6.85 1.15
 1 12 -4 5 0.94
 -1 -12 -4 5.96 1.15
 1 -12 4 4.16 0.91
 1 12 -4 6.06 1.01
 -1 -12 -4 4.97 1.02
 -1 12 4 3.87 1.05
 1 12 -4 5.4 1.03
 -1 12 4 6.35 1.26
 -1 -12 4 4.4 0.91
 -1 12 -4 5.23 0.98
 1 -12 -4 5.11 1.01
 1 12 4 6.89 1.32
 -1 12 -4 5.89 0.96
 1 12 4 4.57 1.01
 1 -12 -4 4.94 1.06
 -1 12 -4 5.56 0.97
 1 12 4 6.12 1.19
 -2 12 4 144.85 6.69
 -2 12 4 137.78 6.7
 -2 -12 -4 152.25 6.82
 2 -12 4 154.57 6.51
 -2 -12 -4 134.87 6.64
 -2 12 4 157.47 6.96
 2 -12 4 133.19 6.42
 -2 12 -4 141.57 6.58
 2 -12 -4 141.7 6.67
 2 12 4 139.69 6.86
 2 12 4 150.36 6.89
 2 -12 -4 139.34 6.7
 -2 -12 4 148.66 6.56
 2 12 4 143.87 6.79
 -3 12 4 3.5 0.98
 -3 -12 -4 1.34 0.81
 -3 -12 -4 2.77 0.95
 3 -12 4 2.42 0.83
 3 -12 4 3.14 0.87
 -3 12 4 4.4 1.04
 3 -12 -4 1.52 0.8
 3 12 4 1.65 0.92
 3 12 4 2.06 0.87
 -3 -12 4 1.89 0.77
 3 -12 -4 2.93 0.87
 -3 12 -4 2.93 0.73
 -4 12 4 66.57 3.76
 -4 -12 -4 53.38 3.57
 -4 12 4 63.7 3.68
 4 -12 4 66.9 3.57
 4 -12 -4 64.34 3.67
 -4 12 -4 65.62 3.61
 4 12 4 62.66 3.88
 -4 12 -4 62.33 3.6
 4 12 4 62.39 3.87
 4 12 4 65.2 3.82
 4 -12 -4 60.03 3.63
 4 -12 -4 65.11 3.69
 -5 12 4 0.1 0.65
 5 12 -4 0.6 0.73
 5 -12 4 0.71 0.64
 -5 -12 -4 0.45 0.76
 5 -12 -4 0.03 0.68
 5 12 4 -0.43 0.58
 -5 12 -4 1.57 0.75
 5 -12 -4 0.33 0.61
 5 12 4 0.38 0.77
 5 -12 -4 -0.35 0.66
 5 -12 -4 0.63 0.76
 5 12 4 0.37 0.68
 -6 12 4 0.94 0.72
 -6 -12 -4 1.58 0.93
 6 12 -4 1.67 0.83
 6 -12 4 0.94 0.79
 -6 12 -4 0.24 0.61
 6 -12 -4 1.58 1.03
 6 12 4 1.19 0.81
 6 -12 -4 1.62 0.8
 6 12 4 1.06 0.79
 6 12 4 0.76 0.79
 6 -12 -4 1.46 0.86
 6 -12 -4 1.23 0.82
 -7 12 4 11.9 1.58
 7 12 -4 12.95 1.7
 7 -12 4 14.46 1.66
 -7 -12 -4 13.43 2.01
 -7 12 -4 11.52 1.54
 7 -12 -4 17.79 1.96
 7 -12 -4 14.22 1.85
 7 -12 -4 14.77 2.03
 7 12 4 16.06 2.04
 7 -12 -4 12.28 1.88
 7 12 4 15.29 1.85
 7 12 4 14.74 1.98
 8 -12 4 12.48 1.66
 8 12 -4 6.96 1.52
 -8 12 4 15.08 1.8
 8 -12 -4 8.69 1.72
 -8 12 -4 10.27 1.72
 8 12 4 14.64 2.27
 8 12 4 11.62 1.98
 8 -12 -4 8.41 1.63
 8 12 4 7.16 1.61
 9 -12 4 8.06 1.58
 -9 12 4 7.11 1.54
 9 12 -4 4.02 1.46
 9 12 -4 7.52 1.71
 9 12 4 7.73 1.75
 9 -12 -4 8.68 1.65
 9 12 4 5.88 1.66
 9 -12 -4 5.29 1.39
 -9 12 -4 5.43 1.42
 9 12 4 6.58 1.65
 10 -12 4 35.49 2.99
 10 12 -4 37.08 3.33
 10 12 -4 35.37 3.4
 10 12 -4 26.62 3.08
 -10 12 4 26.8 2.77
 10 12 4 31.03 3.18
 10 12 4 30.61 3.12
 10 12 4 32.68 3.23
 -10 12 -4 36.93 3.05
 10 -12 -4 29.71 2.9
 10 -12 -4 30.53 2.91
 11 12 -4 -0.13 1.16
 11 12 -4 -1.42 0.91
 11 -12 4 -0.48 1.04
 11 12 -4 0.83 1.26
 11 12 4 -1.33 1.06
 -11 12 -4 -0.74 0.95
 11 -12 -4 0.9 1.25
 11 12 4 2.33 1.38
 11 12 4 0.71 1.26
 11 -12 -4 0.32 1.16
 12 12 -4 77.25 5.54
 12 12 -4 66.86 5.31
 12 -12 4 69.52 4.84
 12 12 -4 74.58 5.54
 12 12 4 74.37 5.61
 12 12 4 72.77 5.39
 -12 12 -4 71.22 5
 12 -12 -4 75.22 5.18
 12 12 4 63.69 5.19
 13 12 -4 1.63 1.71
 13 -12 4 -1.76 1.3
 13 12 -4 1.88 1.85
 13 12 -4 0.27 1.54
 13 12 4 2.01 1.74
 13 12 4 0.63 1.68
 13 12 4 0.32 1.42
 -13 12 -4 0.14 1.34
 13 -12 -4 0.74 1.56
 0 -13 4 -0.63 0.5
 0 13 4 0.21 0.53
 0 13 4 -0.17 0.59
 0 13 4 0.04 0.61
 0 13 -4 -0.21 0.4
 0 -13 -4 0.22 0.67
 0 -13 -4 0.27 0.68
 -1 13 4 65.86 3.82
 -1 13 4 63.52 3.83
 -1 13 4 69.87 3.84
 1 -13 4 69.87 3.65
 -1 -13 -4 66.58 3.8
 -1 -13 -4 67.21 3.8
 1 13 -4 76.43 3.79
 1 13 4 63.03 3.76
 -1 13 -4 69.27 3.67
 1 -13 -4 64.37 3.76
 1 13 4 61.61 3.82
 1 -13 -4 65.11 3.77
 1 13 4 67.55 3.85
 -1 -13 4 67.54 3.64
 -2 13 4 23.55 2.07
 2 -13 4 24.09 1.89
 -2 13 4 25.78 2.06
 -2 13 4 21.85 1.98
 -2 -13 -4 18.78 1.84
 2 13 -4 23.23 1.86
 -2 -13 -4 27.48 2.14
 2 -13 -4 22.25 1.98
 2 13 4 20.1 2.02
 2 -13 -4 23.84 2.01
 2 13 4 21.35 1.97
 -2 13 -4 22.9 1.84
 2 13 4 24.03 2.08
 -2 -13 4 21.94 1.9
 -3 13 4 39.65 2.79
 -3 -13 -4 38.96 2.75
 3 -13 4 40.12 2.61
 -3 13 4 38.37 2.78
 -3 -13 -4 40.69 2.79
 -3 13 4 36.3 2.71
 -3 -13 4 35.85 2.53
 3 -13 -4 36.52 2.66
 3 13 4 43.24 2.98
 3 13 4 37.18 2.77
 -3 13 -4 41.37 2.64
 3 13 4 43.53 2.94
 3 -13 -4 39.77 2.69
 -4 13 4 5.03 1.13
 -4 -13 -4 5.16 1.24
 -4 13 4 3.88 1.02
 4 -13 4 7.02 1.28
 4 13 4 8.05 1.5
 4 13 4 6.04 1.25
 4 13 4 7.57 1.45
 4 -13 -4 3.9 1.07
 -4 13 -4 6.14 1.17
 4 -13 -4 5.91 1.13
 5 -13 4 3.71 1.01
 -5 -13 -4 2.92 1.06
 5 13 -4 2.46 0.88
 -5 13 4 2.52 0.9
 5 -13 -4 2.06 0.95
 5 13 4 2.77 1.01
 -5 13 -4 2.87 0.91
 5 13 4 3.02 0.99
 5 -13 -4 1.86 0.8
 5 -13 -4 1.15 0.89
 5 13 4 1.36 0.82
 5 -13 -4 0.95 0.72
 -6 13 4 12.3 1.62
 6 13 -4 10.11 1.68
 6 -13 4 11.42 1.57
 -6 -13 -4 10.11 1.73
 6 -13 -4 12.79 1.84
 6 13 4 8.99 1.7
 6 13 4 12.94 1.67
 -6 13 -4 9.22 1.53
 6 -13 -4 10.91 1.73
 6 -13 -4 11.07 1.71
 6 13 4 7.94 1.57
 6 -13 -4 13.02 1.85
 7 -13 4 2.06 0.94
 7 13 -4 2.65 0.98
 -7 13 4 1.77 1.02
 7 -13 -4 2.75 1.06
 7 -13 -4 1.2 0.84
 7 13 4 1.28 0.89
 7 13 4 2.5 0.89
 7 13 4 3.11 1.28
 -7 13 -4 1.9 0.89
 8 -13 4 12.1 1.78
 8 13 -4 7.06 1.49
 -8 13 4 9.37 1.63
 8 13 -4 8.22 1.81
 8 13 4 7.74 1.75
 8 -13 -4 7.33 1.52
 8 13 4 8.23 1.76
 8 -13 -4 9.42 1.67
 8 13 4 8.59 1.73
 -8 13 -4 8.42 1.62
 9 13 -4 10 1.97
 9 -13 4 8.39 1.74
 9 13 -4 15.27 2.38
 9 13 -4 15.22 1.99
 -9 13 4 11.71 1.94
 9 13 4 14.46 2.35
 9 13 4 20.47 2.46
 9 13 4 11.69 2.15
 9 -13 -4 11.25 2.01
 -9 13 -4 10.76 1.91
 9 -13 -4 14.79 2
 10 -13 4 1.44 1.13
 10 13 -4 4.02 1.66
 -10 13 4 2.3 1.13
 10 13 -4 4.32 1.57
 10 13 -4 4.28 1.62
 10 -13 -4 3.77 1.46
 10 -13 -4 2.53 1.32
 10 13 4 3.95 1.71
 10 13 4 4.98 1.74
 10 13 4 5.94 1.78
 -10 13 -4 2.87 1.29
 11 13 -4 10.07 2.27
 11 -13 4 12.11 2.09
 11 13 -4 9.57 2.19
 11 13 -4 8.97 2.15
 11 13 4 8.41 2.17
 -11 13 -4 10.83 2.06
 11 -13 -4 9.73 2.13
 11 13 4 11.42 2.47
 11 13 4 11.65 2.38
 12 13 -4 -0.12 1.26
 12 -13 4 0.87 1.36
 12 13 -4 0.44 1.49
 12 13 -4 -0.82 1.26
 12 13 4 1.47 1.65
 12 13 4 -1.25 1.22
 12 -13 -4 1.22 1.3
 12 13 4 -0.17 1.37
 -12 13 -4 0.09 1.12
 13 13 -4 14.22 3.01
 13 -13 -4 15.39 2.94
 13 13 4 18.64 3.38
 13 13 4 20.65 3.24
 -13 13 -4 15.73 2.72
 13 13 4 12.46 2.84
 0 14 4 146.38 7.13
 0 -14 -4 145.39 6.95
 0 14 4 154.07 7.08
 0 14 4 144.89 7.02
 0 -14 -4 143.81 6.91
 0 14 -4 142.37 6.8
 0 -14 4 147.28 6.74
 1 14 -4 0.17 0.5
 -1 14 4 0.19 0.59
 1 -14 4 0.27 0.65
 -1 -14 -4 1.08 0.73
 -1 14 4 -0.19 0.55
 -1 -14 -4 1.1 0.8
 -1 14 4 0.82 0.73
 1 14 4 -0.07 0.62
 1 14 4 1.51 0.72
 1 14 4 0.99 0.75
 -1 -14 4 -0.02 0.52
 1 -14 -4 0.09 0.56
 -1 14 -4 0.05 0.45
 1 -14 -4 -0.92 0.64
 -2 14 4 111.82 5.66
 -2 -14 -4 114.48 5.71
 2 14 -4 104.49 5.49
 -2 14 4 112.95 5.83
 2 -14 4 117.93 5.53
 -2 -14 -4 110.39 5.72
 -2 14 4 112.71 5.75
 2 -14 -4 113.08 5.68
 -2 14 -4 109.11 5.53
 2 -14 -4 116.7 5.72
 2 14 4 114.54 5.93
 2 14 4 110.92 5.78
 -2 -14 4 109.33 5.49
 2 14 4 121.21 5.85
 -3 14 4 11.09 1.47
 -3 14 4 12.51 1.57
 -3 14 4 9.95 1.59
 3 -14 4 8.26 1.36
 -3 -14 -4 10.1 1.61
 -3 -14 -4 12.18 1.75
 -3 -14 4 11.46 1.56
 -3 14 -4 12.85 1.5
 3 14 4 11.21 1.77
 3 14 4 10.71 1.44
 3 14 4 8.41 1.51
 3 -14 -4 10.76 1.63
 3 -14 -4 12.69 1.49
 4 14 -4 40.37 2.89
 -4 -14 -4 39.42 2.94
 -4 -14 -4 42.26 3
 -4 14 4 41.63 2.94
 -4 14 4 38.44 2.94
 4 -14 4 43.34 2.83
 -4 -14 4 46.12 2.95
 4 14 4 42.57 3.13
 4 -14 -4 43.83 3.02
 4 14 4 39.67 2.99
 -4 14 -4 43.47 2.92
 4 -14 -4 36.96 2.83
 -4 14 -4 41.06 2.82
 4 14 4 37.98 3.03
 5 -14 4 6.24 1.24
 -5 14 4 6.88 1.36
 5 14 -4 9.71 1.59
 -5 14 -4 7.26 1.35
 5 -14 -4 5.32 1.31
 5 14 4 8.17 1.58
 5 -14 -4 7.95 1.4
 5 14 4 4.22 1.29
 5 14 4 7.51 1.55
 6 14 -4 3.01 1
 6 -14 4 1.8 0.91
 -6 14 4 2.93 0.94
 6 -14 -4 1.56 0.88
 6 14 4 0.78 0.89
 6 -14 -4 3.25 1.07
 -6 14 -4 2.7 0.98
 6 14 4 2.49 1.09
 6 14 4 2.63 1.22
 -7 14 4 7.39 1.48
 7 14 -4 9.98 1.74
 7 -14 4 7.56 1.45
 7 14 4 3.52 1.27
 7 14 4 8.9 1.87
 7 -14 -4 5.12 1.33
 7 14 4 5.38 1.49
 7 -14 -4 5.82 1.35
 -7 14 -4 5.59 1.3
 8 14 -4 12.03 2.05
 -8 14 4 9.87 1.75
 8 14 -4 8.79 1.73
 8 -14 4 12.59 1.65
 8 14 4 9.46 1.94
 8 14 4 11.12 2.17
 8 -14 -4 9.38 1.8
 8 -14 -4 14.55 2.16
 -8 14 -4 15 1.95
 8 14 4 13.25 2.19
 9 14 -4 9.06 1.89
 -9 14 4 9.57 1.86
 9 -14 4 9.31 1.72
 9 14 -4 6.04 1.64
 9 14 -4 8.04 1.91
 9 -14 -4 7.04 1.83
 -9 14 -4 7.85 1.67
 9 -14 -4 2.04 1.13
 9 14 4 8.53 1.93
 9 14 4 6.93 1.8
 9 14 4 7.1 1.84
 10 14 -4 35.5 3.56
 10 -14 4 35.73 3.07
 10 14 -4 34.9 3.48
 10 14 -4 37.42 3.62
 -10 14 4 31.63 3.16
 -10 14 -4 35.63 3.22
 10 14 4 31.8 3.36
 10 14 4 34.79 3.44
 10 14 4 38.76 3.69
 10 -14 -4 40.06 3.37
 11 14 -4 0.25 1.22
 11 14 -4 0.91 1.31
 11 -14 4 1.74 1.4
 11 14 -4 0.3 1.46
 11 14 4 -2.96 1.25
 -11 14 -4 -1.24 1.03
 11 -14 -4 -1.15 1
 11 14 4 -0.98 1.2
 11 14 4 1.09 1.32
 12 14 -4 59.39 4.96
 12 14 -4 49.64 4.6
 12 14 -4 47.65 4.33
 12 -14 -4 57.26 4.47
 -12 14 -4 54.63 4.44
 12 14 4 48.29 4.34
 12 14 4 48.96 4.61
 12 14 4 46.4 4.59
 13 14 4 -0.62 1.5
 -13 14 -4 -0.64 1.25
 0 15 4 1.2 0.79
 0 -15 -4 0.55 0.66
 0 -15 4 -0.19 0.64
 0 -15 -4 0.5 0.81
 0 15 4 1.28 0.69
 0 15 -4 -0.54 0.5
 0 15 4 -0.87 0.49
 1 -15 4 33.17 2.46
 -1 -15 -4 42.89 2.85
 -1 15 4 31.51 2.53
 -1 15 4 32.93 2.62
 -1 15 4 34.37 2.73
 -1 -15 -4 32.46 2.55
 1 15 -4 35.54 2.54
 -1 15 -4 33.88 2.45
 1 15 4 32.36 2.68
 -1 -15 4 35.97 2.53
 1 -15 -4 34.43 2.71
 1 15 4 36.54 2.74
 1 -15 -4 37.38 2.65
 1 15 4 36 2.66
 -2 15 4 5.25 1.18
 -2 -15 -4 7.54 1.35
 2 -15 4 7.78 1.3
 -2 15 4 11.21 1.49
 2 15 -4 7.72 1.32
 -2 -15 -4 8.02 1.53
 -2 15 4 5.8 1.29
 -2 15 -4 6.51 1.21
 -2 -15 4 7.55 1.31
 2 -15 -4 5.35 1.18
 2 -15 -4 10.58 1.62
 2 15 4 4.08 1.13
 2 15 4 6.95 1.37
 2 15 4 6.09 1.39
 3 -15 4 18.7 1.83
 3 15 -4 22.58 1.98
 -3 -15 -4 15.42 1.81
 -3 15 4 22.12 2.17
 -3 15 4 17.01 1.92
 -3 15 4 20.85 2.06
 3 15 4 14.57 1.87
 -3 15 -4 17.13 1.8
 -3 -15 4 20.26 1.96
 3 15 4 15.01 1.82
 3 -15 -4 20.55 1.93
 3 15 4 19.46 2.06
 -4 15 4 9.8 1.65
 4 15 -4 8.7 1.51
 4 -15 4 11.18 1.44
 -4 15 4 9.26 1.59
 -4 -15 -4 6.68 1.39
 4 -15 -4 8.96 1.54
 -4 15 -4 11.7 1.5
 4 15 4 12 1.88
 -4 15 -4 10.93 1.49
 -4 -15 4 6.24 1.27
 4 15 4 9.43 1.69
 4 15 4 9.51 1.65
 5 -15 4 0.45 0.8
 5 15 -4 2.81 1.07
 -5 15 4 2.43 0.99
 5 -15 -4 3.56 1.12
 -5 15 -4 3.34 1.01
 5 15 4 -0.13 0.73
 5 15 4 2.86 1.26
 5 15 4 0.82 0.97
 -5 -15 4 3.42 1.1
 5 -15 -4 4.28 1.16
 -6 15 4 8.5 1.59
 6 15 -4 3.98 1.15
 6 -15 4 4.18 1.2
 -6 15 -4 7.82 1.49
 6 15 4 5.84 1.48
 6 -15 -4 5.49 1.39
 6 15 4 3.58 1.32
 6 15 4 5.62 1.57
 6 -15 -4 7.44 1.54
 -7 15 4 3.91 1.26
 7 15 -4 0.42 0.72
 7 -15 4 1.96 1.02
 7 15 -4 2.4 1.26
 7 -15 -4 2.5 1.19
 7 15 4 1.29 1.03
 7 -15 -4 1.14 0.96
 -7 15 -4 1.77 1.02
 7 15 4 1.39 1.19
 7 15 4 0.93 1.01
 8 15 -4 5.02 1.42
 8 15 -4 4.78 1.34
 -8 15 4 7.36 1.6
 8 15 -4 11.38 2.06
 8 -15 4 7.2 1.52
 8 15 4 5.91 1.59
 8 15 4 5.27 1.7
 8 -15 -4 4.64 1.47
 -8 15 -4 6.56 1.46
 8 15 4 6.65 1.71
 -9 15 4 6.45 1.67
 9 -15 4 12.03 1.92
 9 15 -4 12.03 2.16
 9 15 -4 12.43 2.31
 9 15 -4 7.87 1.79
 -9 15 -4 9.34 1.84
 9 15 4 8.39 2.12
 9 15 4 6.38 2.01
 9 15 4 10.04 2.21
 9 -15 -4 8.83 1.94
 10 15 -4 3.13 1.39
 10 15 -4 1.44 1.17
 -10 15 4 4.51 1.47
 10 15 -4 3.83 1.55
 10 -15 -4 3.91 1.46
 10 15 4 4.16 1.74
 10 15 4 3.29 1.62
 10 15 4 3 1.6
 -10 15 -4 2.63 1.48
 11 15 -4 8.89 2.16
 11 15 -4 13.47 2.65
 11 15 -4 7.04 2.01
 11 15 4 13.24 2.6
 -11 15 -4 14 2.36
 11 -15 -4 12.79 2.38
 11 15 4 8.47 2.27
 11 15 4 11.34 2.36
 12 15 -4 -0.45 1.67
 12 15 4 -0.3 1.49
 12 -15 -4 -0.5 1.4
 12 15 4 0.64 1.57
 -12 15 -4 -0.05 1.31
 12 15 4 0.99 1.74
 0 -16 -4 116.12 5.94
 0 16 4 109.37 5.93
 0 16 4 118.94 6.18
 0 16 -4 112.75 5.81
 0 -16 4 114.11 5.72
 1 16 -4 5.66 1.25
 1 -16 4 8.16 1.41
 -1 16 4 6.04 1.3
 -1 -16 -4 4.07 1.09
 -1 16 4 4.41 1.18
 -1 16 4 5.48 1.27
 -1 16 -4 4.85 1.18
 1 16 4 6.39 1.36
 1 16 4 3.83 1.18
 1 -16 -4 5.68 1.21
 -1 -16 4 6.17 1.32
 1 16 4 4.8 1.25
 -2 16 4 84.63 4.8
 -2 16 4 82.86 4.95
 -2 -16 -4 87.43 4.83
 -2 16 4 92.61 5
 2 -16 4 89.17 4.62
 2 16 -4 85.04 4.75
 -2 -16 4 91.27 4.67
 2 -16 -4 86.47 4.82
 2 16 4 81.58 4.88
 -2 16 -4 88.31 4.72
 2 16 4 77.83 4.78
 2 16 4 80.76 4.95
 3 -16 4 4.24 1.06
 -3 16 4 4.57 1.23
 -3 -16 -4 3.81 1.13
 3 16 -4 5.32 1.21
 -3 16 4 4.56 1.26
 -3 16 4 4.39 1.19
 3 16 -4 3.66 1.02
 3 16 4 4.65 1.29
 3 16 4 5.08 1.31
 3 -16 -4 2.76 1.05
 -3 -16 4 4.12 1.04
 -3 16 -4 4.43 1.06
 -3 16 -4 5.6 1.28
 3 16 4 2.89 1.08
 4 -16 4 16.3 1.75
 -4 16 4 16.94 1.94
 4 16 -4 15.52 1.9
 -4 16 4 10.84 1.76
 -4 -16 -4 14.06 1.83
 4 16 4 12.69 1.71
 4 16 4 14.75 1.96
 4 -16 -4 15.17 1.77
 -4 -16 4 12.36 1.57
 -4 16 -4 17.78 1.85
 4 16 4 14.37 1.99
 -4 16 -4 12.44 1.71
 -5 16 4 8.81 1.6
 5 -16 4 9.37 1.5
 5 16 -4 7.91 1.61
 -5 -16 -4 6.64 1.56
 5 16 4 8.42 1.7
 -5 -16 4 9.04 1.57
 -5 16 -4 8.49 1.52
 5 16 4 5.86 1.51
 5 -16 -4 10.13 1.7
 5 16 4 6.55 1.52
 5 -16 -4 8.95 1.65
 6 -16 4 0.8 0.81
 6 16 -4 -0.09 0.73
 -6 16 4 0.99 0.88
 6 16 -4 0.4 0.84
 6 -16 -4 0.63 0.88
 6 16 4 1.21 1.09
 -6 16 -4 1.56 0.92
 6 16 4 1.02 0.98
 6 -16 -4 0.84 0.96
 6 16 4 -0.18 0.81
 7 16 -4 12.07 2.07
 7 16 -4 10.41 1.88
 -7 16 4 14.61 1.98
 7 -16 4 14 1.85
 7 16 -4 16.7 2.12
 7 16 4 13.44 2.3
 7 16 4 13 2.19
 7 -16 -4 13.12 2.08
 7 16 4 13.9 2.29
 -7 16 -4 10.77 1.92
 8 16 -4 5.36 1.5
 8 -16 4 7.19 1.54
 8 16 -4 10.01 2.06
 -8 16 4 6.72 1.61
 8 16 -4 5.31 1.41
 8 -16 -4 7.02 1.7
 -8 16 -4 6.43 1.58
 8 16 4 4.04 1.48
 8 16 4 6.71 1.87
 8 16 4 5.49 1.79
 9 16 -4 7.36 1.73
 -9 16 4 10.42 2.04
 9 16 -4 14.6 2.52
 9 16 -4 12.83 2.38
 9 16 4 6.31 1.91
 9 -16 -4 8.71 1.9
 9 16 4 8.61 2.23
 -9 16 -4 7.09 1.78
 9 16 4 10.27 2.21
 10 16 -4 20.49 2.66
 10 16 -4 20.85 2.72
 10 16 -4 18.55 3.04
 -10 16 4 25.51 2.82
 10 16 4 22.16 3.02
 10 16 4 21.07 2.87
 10 -16 -4 22.52 2.74
 -10 16 -4 19.7 2.66
 10 16 4 24.32 3.13
 11 16 -4 0.48 1.84
 11 16 -4 -0.45 1.55
 11 16 -4 0.53 1.4
 11 16 4 0.42 1.46
 -11 16 -4 0.63 1.35
 11 -16 -4 0.93 1.44
 11 16 4 -0.97 1.63
 11 16 4 -0.49 1.24
 12 16 4 41.29 4.26
 0 17 4 -0.15 0.71
 0 17 4 -0.57 0.64
 0 -17 4 -0.4 0.64
 0 17 -4 0.31 0.57
 0 -17 -4 -0.38 0.77
 0 17 4 0.36 0.82
 -1 17 4 62.67 3.96
 -1 17 4 62.81 3.81
 1 -17 4 50.9 3.35
 1 17 -4 54.89 3.56
 -1 -17 -4 53.59 3.65
 -1 17 4 59.94 3.83
 1 -17 -4 52.25 3.57
 -1 17 -4 55.48 3.56
 1 17 4 51.44 3.7
 -1 -17 4 52.54 3.42
 1 17 4 56.43 3.77
 1 17 4 57.11 3.74
 2 -17 4 1.56 0.83
 -2 17 4 1.96 0.97
 2 17 -4 1.09 0.74
 -2 17 4 2.14 0.98
 2 17 -4 1.68 0.93
 -2 -17 -4 2.53 1.08
 -2 17 4 0.55 0.76
 -2 -17 4 2.6 0.97
 2 -17 -4 1.98 1.03
 2 17 4 2 0.93
 -2 17 -4 1.42 0.78
 2 17 4 1.02 0.9
 2 17 4 2.16 1.04
 3 17 -4 31.78 2.71
 -3 -17 -4 31.52 2.68
 3 -17 4 33.71 2.53
 -3 17 4 35.82 2.85
 -3 17 4 30.71 2.69
 -3 17 4 28.91 2.73
 3 17 -4 27.86 2.53
 3 -17 -4 32.28 2.63
 3 17 4 33.93 2.88
 -3 -17 4 33.04 2.56
 -3 17 -4 30.57 2.58
 3 17 4 34.95 2.95
 3 17 4 29.81 2.72
 -3 17 -4 29.35 2.59
 -4 17 4 2.61 1.05
 -4 17 4 0.24 0.92
 -4 -17 -4 3.2 1.14
 4 17 -4 3 1.09
 4 17 -4 3.65 1.19
 4 -17 4 4.28 1.14
 4 17 4 2.48 1.13
 4 17 4 0.44 0.99
 -4 17 -4 2.42 0.97
 -4 17 -4 2.98 1.04
 -4 -17 4 2.33 0.98
 4 17 4 1.65 1
 4 -17 -4 2.96 1.12
 4 -17 -4 3.75 1.17
 5 -17 4 8.13 1.47
 -5 17 4 7.33 1.55
 5 17 -4 7.58 1.68
 -5 -17 -4 11.73 1.95
 5 17 -4 10.11 1.77
 5 -17 -4 7.24 1.64
 5 17 4 5.8 1.46
 -5 -17 4 9.22 1.61
 5 17 4 6.87 1.75
 -5 17 -4 7.08 1.51
 5 17 4 7.82 1.7
 -6 17 4 2.18 1.08
 6 17 -4 1.62 1.04
 6 17 -4 0.77 0.75
 -6 -17 -4 0.86 1.13
 6 -17 -4 0.62 0.98
 6 17 4 1.32 1.13
 6 17 4 0.13 0.88
 -6 17 -4 1.53 1.04
 6 17 4 2.98 1.31
 7 17 -4 1.1 0.9
 -7 17 4 -0.54 0.87
 7 17 -4 0.8 1.04
 7 17 -4 -0.47 0.86
 7 17 4 -0.81 0.95
 -7 17 -4 0.42 0.83
 7 17 4 -1 1.01
 7 17 4 1.16 1.23
 7 -17 -4 -0.16 0.99
 8 17 -4 3.17 1.51
 8 17 -4 3.22 1.35
 -8 17 4 2.59 1.22
 8 17 -4 3.37 1.16
 8 17 4 3.38 1.47
 8 17 4 3.06 1.43
 8 17 4 2.49 1.37
 -8 17 -4 3.09 1.18
 8 -17 -4 -0.41 0.88
 9 17 -4 5.52 1.85
 -9 17 4 7.79 1.86
 9 17 -4 5.7 1.7
 9 17 -4 8.35 2.01
 9 -17 -4 9 2.13
 9 17 4 4.77 1.67
 -9 17 -4 6.73 1.77
 9 17 4 7.64 2.1
 9 17 4 7.48 2.13
 10 17 -4 0.29 1.24
 10 17 -4 -0.15 1.49
 10 17 -4 0.9 1.5
 10 -17 -4 -0.91 1.06
 10 17 4 -0.13 1.21
 -10 17 -4 0.65 1.23
 10 17 4 -0.14 1.37
 10 17 4 -0.21 1.26
 11 17 4 12.86 2.89
 11 17 4 10.6 2.55
 11 -17 -4 15.34 2.63
 -11 17 -4 16.95 2.84
 11 17 4 9.49 2.69
 0 -18 4 83.15 4.5
 0 -18 -4 80.28 4.72
 0 18 4 75.02 4.82
 0 18 -4 77.81 4.7
 0 18 4 74.77 4.69
 0 18 -4 80.73 4.65
 0 18 4 72 4.73
 -1 18 4 2.32 1.12
 1 18 -4 1.42 0.84
 -1 -18 -4 2.75 1.07
 -1 18 4 1.49 0.97
 1 -18 4 1.68 0.92
 -1 18 4 3.42 1.28
 1 18 -4 2.57 0.96
 -1 18 -4 2.61 0.99
 -1 18 -4 2.04 0.95
 -1 -18 4 3.86 1.12
 -1 18 -4 3.73 1
 1 18 4 1.47 1.01
 1 18 4 1.51 1.05
 1 -18 -4 0.99 0.91
 1 18 4 2.5 1.09
 2 18 -4 58.71 3.82
 2 18 -4 56.59 3.81
 -2 18 4 64.91 4.2
 -2 -18 -4 52.15 3.75
 -2 18 4 63.53 4
 2 18 -4 58.87 3.88
 -2 18 4 55.04 3.89
 -2 18 -4 54.17 3.72
 2 18 4 61.55 3.97
 -2 18 -4 55.81 3.75
 2 -18 -4 59.22 3.87
 2 18 4 56.77 3.93
 2 18 4 57.64 4.06
 -2 18 -4 54.19 3.66
 3 18 -4 10.79 1.76
 3 18 -4 10.49 1.83
 -3 -18 -4 8.96 1.7
 -3 18 4 13.06 1.99
 -3 18 4 10.69 1.92
 -3 18 4 11.86 2
 3 18 -4 14.07 1.88
 3 -18 -4 10.45 1.73
 -3 18 -4 15.65 1.83
 3 18 4 11.02 1.88
 -3 18 -4 10.39 1.75
 3 18 4 10.59 1.89
 3 18 4 8.81 1.89
 -3 18 -4 12.47 1.58
 -4 18 4 29.15 2.71
 4 18 -4 29.85 2.81
 -4 18 4 34.1 2.99
 4 18 -4 35.36 2.84
 -4 -18 -4 31.68 2.8
 4 18 -4 35.15 2.94
 4 -18 -4 28.47 2.66
 4 18 4 28.92 2.79
 -4 18 -4 31.64 2.75
 4 18 4 27.32 2.86
 -4 18 -4 32.21 2.78
 4 18 4 29.28 2.81
 5 18 -4 2.97 1.09
 5 18 -4 1.33 1.12
 -5 -18 -4 0.99 1
 -5 18 4 1.42 0.98
 -5 18 -4 1.36 1
 5 18 4 2.18 1.12
 5 -18 -4 1.49 1.18
 5 18 4 2.29 1.22
 5 18 4 2.15 1.2
 6 18 -4 1.75 1.06
 -6 18 4 1.28 1.07
 6 18 -4 1.37 0.96
 6 18 -4 1 1
 -6 -18 -4 0.77 1.04
 6 18 4 2.22 1.28
 -6 18 -4 0.93 0.98
 6 -18 -4 1.83 1.26
 6 18 4 1 0.92
 7 18 -4 6.21 1.66
 -7 18 4 5.75 1.5
 7 18 -4 6.98 1.79
 -7 -18 -4 5.95 1.66
 7 18 -4 7.2 1.69
 7 18 4 6.59 1.95
 7 -18 -4 4.24 1.4
 7 18 4 4.99 1.56
 -7 18 -4 8.9 1.8
 7 18 4 6.3 1.78
 8 18 -4 9.78 2.12
 8 18 -4 8.84 1.95
 8 18 -4 6.95 1.97
 -8 18 4 10.91 2.02
 8 18 4 5.5 1.9
 8 18 4 6.67 1.88
 -8 18 -4 7.49 1.77
 8 18 4 6.75 1.92
 8 -18 -4 9.04 1.92
 9 18 -4 1.97 1.6
 9 18 -4 1.74 1.54
 9 18 -4 -0.7 1.43
 -9 18 4 1.89 1.24
 9 18 4 0.4 1.24
 9 18 4 1.06 1.44
 9 -18 -4 2.37 1.41
 9 18 4 3.21 1.49
 -9 18 -4 2.58 1.34
 10 18 -4 18.06 3.19
 10 18 -4 14.56 2.94
 10 18 -4 20.77 3.22
 10 18 4 20.12 3.22
 10 -18 -4 12.09 2.33
 10 18 4 17.56 3.13
 10 18 4 16.18 3.09
 -10 18 -4 16.11 2.65
 11 18 4 -0.09 1.46
 0 19 4 0.86 1.02
 0 -19 -4 0.67 0.88
 0 19 -4 0.27 0.81
 0 19 4 1.34 0.99
 0 19 -4 1.16 0.91
 0 19 4 -0.03 0.69
 1 19 -4 46.62 3.48
 -1 19 4 41.21 3.36
 -1 19 4 49.24 3.57
 -1 -19 -4 42.87 3.31
 1 19 -4 42.74 3.32
 -1 19 4 43.68 3.5
 -1 19 -4 47.62 3.44
 1 -19 -4 40.7 3.3
 -1 19 -4 44.53 3.3
 1 19 4 47 3.58
 1 19 4 43.63 3.62
 1 19 4 48.17 3.55
 2 19 -4 2.14 1.03
 -2 19 4 3.17 1.28
 2 19 -4 1.87 0.83
 -2 19 4 3.63 1.3
 -2 -19 -4 2.46 1.12
 2 19 -4 3 1.17
 -2 19 4 3.88 1.31
 2 19 4 4.28 1.34
 -2 19 -4 1.87 1
 2 -19 -4 2.59 1.07
 2 19 4 2.86 1.25
 2 19 4 2.46 1.27
 -2 19 -4 3.56 1.08
 -2 19 -4 1.3 0.95
 -3 -19 -4 57.05 4.02
 3 19 -4 55.1 4.1
 -3 19 4 64.66 4.37
 -3 19 4 65.72 4.24
 3 19 -4 66.74 4.23
 -3 19 4 63.99 4.35
 3 19 -4 59.01 4.15
 -3 19 -4 54.83 3.95
 3 19 4 53.36 4.12
 -3 19 -4 61.92 4.11
 3 19 4 63.18 4.26
 3 -19 -4 62.26 4.07
 3 19 4 63.94 4.44
 -3 19 -4 61.64 4.02
 4 19 -4 0.85 1.01
 -4 19 4 -0.08 1.01
 -4 19 4 2.85 1.18
 4 19 -4 -1.21 0.57
 -4 -19 -4 0.31 0.86
 4 19 -4 0.97 1.13
 4 19 4 0.71 1.13
 -4 19 -4 1.52 1.15
 -4 19 -4 2.35 1.08
 4 19 4 0.59 1.12
 4 19 4 1.72 1.09
 4 -19 -4 0.12 0.72
 -5 -19 -4 8.1 1.78
 5 19 -4 3.55 1.39
 -5 19 4 6.46 1.52
 5 19 -4 9.21 1.84
 5 19 -4 5.41 1.58
 5 -19 -4 7.46 1.75
 -5 19 -4 8.1 1.7
 5 19 4 8.12 1.81
 5 19 4 9.05 1.97
 5 19 4 5.86 1.68
 6 19 -4 1.52 1.09
 -6 -19 -4 0.67 1.13
 -6 19 4 3.1 1.25
 6 19 -4 -0.04 0.98
 6 19 -4 -0.62 0.93
 6 19 4 -1.05 0.95
 6 -19 -4 0.25 1.06
 6 19 4 0.15 1.19
 -6 19 -4 0.87 1.02
 6 19 4 1.68 1.42
 -7 19 4 1.72 1.18
 7 19 -4 1.36 1.19
 7 19 -4 1.08 1.22
 7 19 -4 1.63 1.35
 -7 -19 -4 1.21 1.28
 7 19 4 4.68 1.72
 -7 19 -4 -0.56 0.98
 7 -19 -4 1.55 1.28
 7 19 4 -0.63 1.13
 8 19 -4 8 2.17
 -8 -19 -4 5.65 1.74
 8 19 -4 4.34 1.57
 -8 19 4 7.69 1.92
 8 19 -4 7.99 1.91
 -8 19 -4 7.58 1.91
 8 -19 -4 11.54 2.26
 8 19 4 10.99 2.45
 8 19 4 8.44 2.05
 8 19 4 6.15 1.86
 -9 19 4 5.67 1.87
 9 19 -4 5.84 2.18
 9 19 -4 8.84 2.32
 9 19 -4 3.39 1.82
 9 -19 -4 4.84 1.69
 -9 19 -4 6 1.86
 9 19 4 8.66 2.33
 9 19 4 6.61 2.14
 9 19 4 3.62 1.78
 10 -19 -4 -1.16 1.49
 10 19 4 -2.06 1.35
 0 20 4 36.52 3.41
 0 -20 -4 35.52 3.05
 0 20 -4 33.17 3.1
 0 20 4 40.02 3.31
 0 20 4 37.56 3.28
 0 20 -4 40.06 3.2
 0 20 -4 41.23 3.22
 1 20 -4 1.89 1.15
 -1 20 4 2.08 1.12
 -1 20 4 1.37 1.15
 1 20 -4 1.74 0.9
 -1 -20 -4 0.76 0.95
 1 20 -4 0.75 0.99
 -1 20 4 1.13 0.95
 1 20 4 2.25 1.05
 1 -20 -4 0.54 0.93
 1 20 4 3.32 1.38
 -1 20 -4 0.41 0.92
 -1 20 -4 1.41 1.1
 -1 20 -4 0.78 0.72
 1 20 4 2.04 1.16
 2 20 -4 39.07 3.26
 -2 20 4 41.46 3.33
 -2 20 4 35.56 3.09
 -2 20 4 42.65 3.46
 2 20 -4 35.92 3.08
 -2 -20 -4 39.52 3.26
 2 20 -4 36.68 3.12
 -2 20 -4 37.78 3.16
 -2 20 -4 36.34 3.09
 2 20 4 40.53 3.36
 2 20 4 36.38 3.2
 2 -20 -4 34.38 3.06
 2 20 4 28.35 3.13
 -2 20 -4 39.02 3.12
 -3 20 4 0.92 1.02
 3 20 -4 3.21 1.28
 -3 -20 -4 1.76 1.07
 -3 20 4 0.62 1.11
 3 20 -4 0.97 1
 3 20 -4 0.56 0.97
 3 20 4 -0.19 0.92
 3 -20 -4 1.07 1.01
 3 20 4 0.65 1.21
 -3 20 -4 0.82 1.05
 -3 20 -4 0.59 0.98
 -3 20 -4 0.79 0.89
 3 20 4 -0.58 0.97
 -4 20 4 20.22 2.5
 -4 -20 -4 19.07 2.34
 4 20 -4 16.78 2.31
 -4 20 4 16.8 2.22
 4 20 -4 16.45 2.47
 4 20 -4 17.62 2.31
 -4 20 -4 12.62 2.2
 4 20 4 18.92 2.53
 4 20 4 20.12 2.55
 -4 20 -4 21.13 2.47
 4 20 4 17.9 2.38
 4 -20 -4 17.03 2.28
 5 20 -4 2 1.05
 5 20 -4 -0.31 1.11
 -5 -20 -4 2.21 1.25
 5 20 -4 1.59 1.11
 -5 20 4 0.76 1.07
 5 20 4 -0.81 1.08
 5 20 4 -0.08 1.12
 5 -20 -4 0.21 1.04
 -5 20 -4 0.84 1.13
 5 20 4 2.39 1.4
 6 20 -4 -0.72 1
 -6 -20 -4 0.23 1.12
 -6 20 4 0.79 1.25
 6 20 -4 0.86 1.18
 6 20 -4 -0.76 0.99
 6 20 4 0.93 1.27
 6 -20 -4 0.8 1.24
 6 20 4 -0.55 1.15
 6 20 4 -0.65 1.13
 -6 20 -4 0.33 1.08
 7 20 -4 0.42 1.18
 -7 20 4 2.08 1.43
 -7 -20 -4 1.81 1.35
 7 20 -4 2.99 1.59
 7 20 -4 1.85 1.51
 -7 20 -4 0.74 1.37
 7 20 4 4.27 1.77
 7 20 4 -1.12 1.46
 7 -20 -4 1.45 1.35
 7 20 4 2.37 1.44
 -8 -20 -4 5.01 1.82
 8 20 -4 2.87 1.56
 8 20 -4 3.62 1.72
 -8 20 4 6.54 2.01
 8 20 -4 6.08 2.08
 -8 20 -4 6.09 1.7
 8 -20 -4 8.72 2.07
 8 20 4 9.04 2.23
 8 20 4 7.41 2.11
 -9 -20 -4 1.95 1.7
 9 20 4 4.88 2.12
 -9 20 -4 5.64 1.84
 9 -20 -4 2.96 1.71
 0 21 4 -1.35 0.95
 0 21 -4 -1.45 1.06
 0 -21 -4 0.39 0.99
 0 21 4 1.36 1.01
 0 21 -4 -0.11 0.83
 0 21 4 -0.7 0.92
 0 21 -4 -0.54 0.86
 1 21 -4 44.64 3.6
 -1 21 4 40.7 3.57
 -1 21 4 47.89 3.83
 1 21 -4 45.4 3.74
 1 21 -4 49.34 3.88
 -1 21 4 47.03 3.88
 -1 -21 -4 42.69 3.55
 -1 21 -4 45.55 3.67
 1 -21 -4 55.83 3.92
 -1 21 -4 46.59 3.81
 1 21 4 54.03 4.19
 1 21 4 54.29 4.11
 1 21 4 55.21 4
 -1 21 -4 51.84 3.78
 -2 21 4 3.62 1.28
 2 21 -4 1.66 1.07
 -2 21 4 2.89 1.45
 -2 -21 -4 4.99 1.47
 -2 21 4 3.53 1.5
 2 21 -4 1.32 1.14
 2 21 -4 2.03 1.21
 -2 21 -4 2.35 1.31
 2 21 4 3.86 1.53
 2 21 4 4.19 1.56
 -2 21 -4 3.91 1.47
 2 21 4 2.41 1.34
 -2 21 -4 3.4 1.28
 2 -21 -4 3.22 1.25
 3 21 -4 37.7 3.38
 3 21 -4 34.7 3.25
 -3 21 4 34.62 3.37
 3 21 -4 42.39 3.47
 -3 21 4 41.15 3.48
 -3 -21 -4 40.09 3.46
 3 21 4 32.31 3.33
 3 21 4 36.76 3.43
 3 -21 -4 33.67 3.19
 -3 21 -4 39.38 3.41
 -3 21 -4 39.27 3.28
 3 21 4 41.63 3.57
 4 21 -4 1.23 1.28
 4 21 -4 0.73 1.08
 4 21 -4 2.36 1.3
 -4 21 4 -0.62 1.05
 -4 21 4 0.08 1.3
 -4 -21 -4 1.15 1.17
 4 -21 -4 1.39 1.2
 -4 21 -4 2.5 1.41
 4 21 4 1.43 1.42
 -4 21 -4 0.44 1.02
 4 21 4 2.04 1.4
 4 21 4 1.23 1.3
 5 21 -4 6.91 1.8
 -5 21 4 3.82 1.46
 5 21 -4 6.46 1.77
 5 21 -4 6.73 1.86
 -5 -21 -4 7.16 1.85
 5 21 4 5.68 1.95
 -5 21 -4 6.77 1.67
 5 21 4 4.49 1.75
 5 -21 -4 7.19 1.91
 5 21 4 4.33 1.6
 6 21 -4 2.72 1.35
 6 21 -4 4.83 1.78
 6 21 -4 2.02 1.5
 -6 21 4 -0.91 1.12
 -6 -21 -4 4.12 1.54
 6 -21 -4 2.08 1.41
 -6 21 -4 2.66 1.48
 6 21 4 2.7 1.41
 6 21 4 2.17 1.51
 6 21 4 3.49 1.65
 -7 21 4 2.03 1.39
 7 21 -4 0.82 1.5
 7 21 -4 -1.29 1.33
 -7 -21 -4 0.11 1.23
 7 21 4 0.55 1.22
 -7 21 -4 0.75 1.26
 7 21 4 0.8 1.49
 7 -21 -4 0.28 1.37
 7 21 4 1.75 1.65
 -8 21 4 9.65 2.39
 -8 -21 -4 11.53 2.54
 8 21 4 9.48 2.41
 8 21 4 11.78 2.62
 8 -21 -4 13.95 2.69
 -8 21 -4 6.84 1.97
 0 22 -4 11.1 2.16
 0 22 -4 17.7 2.21
 0 22 4 10.08 2.15
 0 22 -4 15.47 2.41
 0 22 4 12.43 2.19
 0 22 4 16.37 2.61
 0 -22 -4 14.3 2.22
 -1 22 4 0.87 1.21
 1 22 -4 4.24 1.37
 -1 22 4 4.57 1.43
 -1 -22 -4 2.78 1.27
 -1 22 4 4.76 1.49
 1 22 -4 3.09 1.39
 1 22 -4 3.63 1.33
 1 22 4 2.24 1.38
 -1 22 -4 2.65 1.36
 1 -22 -4 2.56 1.29
 -1 22 -4 1.75 1.19
 -1 22 -4 2.16 1.2
 1 22 4 2.94 1.46
 1 22 4 1.57 1.4
 2 22 -4 27.22 2.86
 2 22 -4 25.15 2.8
 -2 22 4 23.83 3.01
 -2 22 4 23.85 2.77
 -2 -22 -4 24.65 2.79
 -2 22 4 21.25 2.76
 2 22 -4 23.54 2.75
 2 22 4 30.36 3.06
 2 22 4 20.83 2.71
 2 22 4 27.59 3.17
 -2 22 -4 17.69 2.47
 -2 22 -4 27.24 2.91
 -2 22 -4 23.46 2.64
 2 -22 -4 27.1 2.8
 -3 22 4 2.23 1.38
 3 22 -4 2.22 1.25
 3 22 -4 1.69 1.34
 -3 -22 -4 0.55 1.27
 3 22 -4 1.19 1
 -3 22 4 4.81 1.7
 3 22 4 0.81 1.32
 3 22 4 3.08 1.43
 3 22 4 3.33 1.54
 -3 22 -4 1.37 1.24
 3 -22 -4 2.3 1.39
 -3 22 -4 2.01 1.12
 -4 22 4 14.23 2.6
 4 22 -4 12.86 2.26
 -4 -22 -4 10.98 2.19
 -4 22 4 17.56 2.67
 4 22 -4 14.51 2.55
 4 22 -4 9.38 2.02
 -4 22 -4 9.76 2.05
 4 -22 -4 14.44 2.46
 4 22 4 16.35 2.77
 4 22 4 12.69 2.34
 4 22 4 15.73 2.62
 -4 22 -4 15.17 2.56
 5 22 -4 2.16 1.25
 5 22 -4 2.16 1.54
 -5 -22 -4 2.85 1.35
 5 22 -4 -0.66 1.32
 -5 22 4 1.33 1.33
 5 -22 -4 1.47 1.37
 5 22 4 0.37 1.23
 -5 22 -4 0.77 1.26
 5 22 4 0.4 1.38
 5 22 4 1.58 1.41
 -6 22 4 -0.76 1.21
 -6 -22 -4 0.19 1.35
 6 22 -4 1.33 1.34
 6 22 -4 0.47 1.46
 6 22 -4 0.22 1.49
 6 22 4 1.29 1.36
 6 22 4 0 1.37
 -6 22 -4 0.05 1.11
 6 -22 -4 -0.02 1.15
 6 22 4 2.2 1.65
 -7 22 4 6.24 1.99
 -7 -22 -4 3.69 1.79
 7 22 4 8.87 2.39
 7 -22 -4 6.68 2.13
 7 22 4 6.79 2.2
 0 -23 -4 0.3 1.22
 0 23 -4 -0.44 1.07
 0 23 4 -0.32 1.12
 0 23 4 0.13 1.36
 0 23 -4 -1.28 0.94
 0 23 -4 -1.34 1.09
 0 23 4 -2.11 1.19
 -1 23 4 27.82 3.17
 1 23 -4 24.66 2.84
 -1 23 4 30.2 3.35
 -1 -23 -4 28.23 3.07
 -1 23 4 31.08 3.19
 1 23 -4 30.19 3.28
 1 23 -4 25.46 2.91
 -1 23 -4 25.51 2.82
 1 23 4 31.98 3.48
 1 23 4 25.58 2.96
 -1 23 -4 32.44 3.28
 1 -23 -4 28.09 2.95
 1 23 4 37.49 3.57
 -1 23 -4 34.59 3.17
 2 23 -4 0.89 1.41
 -2 23 4 3.36 1.6
 2 23 -4 5.58 1.69
 2 23 -4 4.57 1.64
 -2 23 4 4.03 1.62
 -2 -23 -4 2.63 1.42
 -2 23 4 2.12 1.56
 2 -23 -4 4.73 1.61
 -2 23 -4 1.48 1.33
 2 23 4 5.62 2.03
 -2 23 -4 5.53 1.71
 -2 23 -4 4.73 1.54
 2 23 4 2.14 1.5
 2 23 4 1.94 1.31
 3 23 -4 34.1 3.4
 -3 23 4 23.05 3.19
 -3 23 4 22 2.81
 3 23 -4 31.68 3.22
 -3 -23 -4 34.83 3.32
 3 23 -4 29.28 3.3
 3 23 4 34.93 3.6
 3 23 4 36.15 3.56
 -3 23 -4 33.35 3.15
 -3 23 -4 29.2 3.28
 3 -23 -4 26.92 2.93
 3 23 4 36.78 3.52
 4 23 -4 3.12 1.72
 -4 23 4 2.25 1.56
 4 23 -4 3.49 1.72
 -4 -23 -4 1 1.41
 4 23 -4 2.6 1.5
 -4 23 4 3.58 1.6
 -4 23 -4 2.02 1.55
 4 23 4 3.36 1.67
 4 23 4 3.13 1.59
 4 23 4 2.23 1.66
 -4 23 -4 1.67 1.41
 4 -23 -4 3.48 1.62
 5 23 -4 5.04 1.87
 -5 -23 -4 2.92 1.75
 5 23 -4 3.59 1.76
 -5 23 4 3.02 1.72
 5 -23 -4 6.14 1.95
 5 23 4 4.43 2.07
 -5 23 -4 3.93 1.61
 5 23 4 4.66 1.9
 5 23 4 1.74 1.71
 -6 -23 -4 5.36 2.01
 -6 23 4 1.68 1.55
 6 23 4 -0.17 1.34
 6 -23 -4 2.35 1.72
 6 23 4 2.08 1.72
 0 24 4 27.4 3.11
 0 24 4 30.68 3.36
 0 24 -4 26.6 3.01
 0 24 -4 23.78 2.98
 0 24 -4 20.51 3.12
 0 -24 -4 26.43 3.08
 0 24 4 23.61 3.06
 1 24 -4 0.17 1.58
 -1 24 4 0.97 1.41
 -1 24 4 0.92 1.32
 1 24 -4 0.87 1.27
 -1 24 4 -0.84 1.41
 1 24 -4 1.87 1.49
 -1 -24 -4 1.55 1.45
 1 24 4 3.26 1.78
 -1 24 -4 1.47 1.44
 1 24 4 -0.41 1.29
 1 24 4 -0.5 1.31
 1 -24 -4 -0.55 1.24
 -1 24 -4 0.67 1.15
 -1 24 -4 -1.03 1.39
 -2 24 4 9.88 2.45
 2 24 -4 11.52 2.43
 -2 24 4 13 2.58
 2 24 -4 8.88 2.07
 -2 -24 -4 9.81 2.17
 -2 24 4 11.73 2.43
 2 24 -4 11.71 2.61
 2 -24 -4 11.93 2.32
 -2 24 -4 8.24 2.41
 -2 24 -4 14.34 2.38
 2 24 4 13.1 2.78
 2 24 4 13.45 2.64
 2 24 4 14.74 2.7
 -2 24 -4 13.61 2.58
 -3 24 4 4 1.85
 -3 -24 -4 4.77 1.81
 -3 24 4 3.35 1.66
 3 24 -4 1.68 1.47
 -3 24 -4 1.47 1.37
 3 24 4 3.75 1.82
 3 -24 -4 2.42 1.56
 3 24 4 1.62 1.54
 3 24 4 3.7 1.96
 -4 24 4 5.39 1.95
 -4 -24 -4 8.16 2.27
 -4 24 4 3 1.85
 4 -24 -4 5.98 1.95
 4 24 4 5.87 2.21
 4 24 4 3.42 1.81
 -5 -24 -4 1.77 1.62
 -5 24 4 2.92 1.58
 5 24 4 1.37 1.35
 5 -24 -4 2.93 1.65
 0 -25 -4 -1.32 1.29
 0 25 4 0.59 1.48
 -1 -25 -4 32.17 3.46
 -1 25 4 28.39 3.35
 1 -25 -4 25.44 3.26
 1 25 4 30.91 3.56
 -2 -25 -4 3.9 1.84
 -2 25 4 6.8 2.2
 2 25 4 3.84 2
 2 -25 -4 5.95 2
 -3 25 4 38.43 3.73
 -3 -25 -4 34.73 3.7
 3 -25 -4 36.86 3.67
 3 25 4 30.03 3.52
 0 0 -5 0.14 0.12
 0 0 -5 0.03 0.15
 0 0 -5 0.05 0.12
 1 0 5 -0.12 0.15
 -1 0 -5 -0.12 0.18
 1 0 -5 -0.08 0.18
 1 0 -5 -0.15 0.16
 2 0 -5 -0.43 0.2
 2 0 -5 -0.33 0.25
 2 0 -5 -0.26 0.23
 2 0 5 -0.2 0.27
 -2 0 -5 -0.13 0.24
 -2 0 5 0.06 0.24
 2 0 -5 -0.29 0.21
 2 0 5 0.14 0.28
 2 0 5 0.17 0.27
 3 0 -5 0.15 0.28
 3 0 -5 -0.03 0.28
 3 0 5 -0.08 0.3
 3 0 5 -0.28 0.28
 3 0 5 0.57 0.39
 -3 0 -5 0.23 0.32
 3 0 -5 -0.14 0.28
 -3 0 5 -0.11 0.23
 3 0 -5 0.12 0.25
 4 0 -5 -0.11 0.41
 -4 0 5 0.19 0.37
 4 0 -5 -0.52 0.23
 4 0 5 -0.38 0.31
 4 0 5 0.15 0.38
 -4 0 -5 -0.15 0.39
 4 0 -5 0.31 0.39
 4 0 -5 0.29 0.36
 4 0 5 -0.12 0.36
 -5 0 -5 -0.41 0.38
 5 0 -5 -0.04 0.33
 -5 0 5 0.42 0.47
 5 0 5 0.39 0.48
 5 0 5 0.06 0.45
 5 0 5 -0.04 0.44
 5 0 -5 0.24 0.45
 5 0 -5 0.09 0.45
 5 0 -5 0.18 0.43
 6 0 5 -0.32 0.49
 6 0 -5 -0.5 0.26
 6 0 -5 -0.56 0.49
 -6 0 -5 0.4 0.54
 6 0 5 0.16 0.52
 6 0 5 -0.21 0.47
 -6 0 5 0.31 0.54
 6 0 -5 -0.97 0.39
 7 0 -5 0.53 0.63
 -7 0 -5 -0.72 0.58
 -7 0 5 0.96 0.62
 7 0 5 -0.65 0.55
 7 0 5 0.62 0.66
 7 0 -5 -0.51 0.56
 7 0 5 -0.49 0.5
 8 0 5 0.07 0.75
 8 0 -5 -0.35 0.64
 8 0 5 0.24 0.76
 8 0 -5 -0.03 0.52
 -8 0 -5 0.39 0.65
 8 0 5 0.74 0.8
 -8 0 5 0 0.64
 9 0 -5 -1.08 0.48
 9 0 5 -1.04 0.84
 -9 0 -5 1.28 0.8
 -9 0 5 -0.24 0.8
 9 0 5 -0.47 0.73
 9 0 5 -0.27 0.73
 9 0 -5 0.84 0.74
 9 0 -5 0.67 0.85
 9 0 -5 1.8 0.84
 10 0 -5 0.08 0.7
 10 0 -5 0.23 0.76
 10 0 -5 0.58 0.78
 10 0 5 -0.39 0.89
 10 0 -5 -0.24 0.69
 10 0 5 0.72 0.84
 10 0 -5 -1.23 0.63
 -10 0 -5 0.08 0.7
 10 0 5 0.17 0.76
 11 0 -5 0.58 1
 -11 0 -5 -0.84 0.65
 11 0 -5 -0.73 0.7
 11 0 5 0.22 1.01
 11 0 5 0.83 0.91
 11 0 -5 0.46 0.84
 11 0 5 -1.16 0.71
 11 0 -5 -0.85 0.86
 12 0 -5 1.79 1.3
 12 0 5 1.86 1.26
 -12 0 -5 -0.55 0.87
 12 0 -5 -0.12 1.1
 12 0 -5 0.26 0.91
 12 0 5 0.09 1.01
 12 0 -5 0.84 1.22
 13 0 -5 -0.42 1.17
 13 0 -5 -1.88 0.86
 13 0 -5 -0.71 1.13
 13 0 5 -1.1 1.22
 13 0 5 1.36 1.18
 -13 0 -5 -0.42 0.99
 14 0 -5 0.98 1.46
 -14 0 -5 -1.31 1.22
 14 0 5 -0.01 1.21
 14 0 -5 -0.12 1.3
 14 0 -5 3.57 1.7
 15 0 -5 -1.77 1.38
 15 0 -5 -2.35 1.41
 15 0 -5 -0.76 1.77
 0 -1 -5 -0.01 0.17
 0 -1 -5 -0.1 0.18
 0 1 5 -0.14 0.16
 1 1 -5 998.8 36.6
 1 1 -5 920.41 36.55
 1 1 -5 981.89 36.56
 1 1 -5 988.51 36.46
 -1 -1 -5 937.4 36.69
 1 -1 -5 974.5 36.67
 -1 1 -5 962.77 36.55
 1 1 5 937.09 36.95
 1 1 5 975.42 36.3
 1 -1 -5 964.58 36.7
 1 1 5 947.17 36.73
 -2 1 5 6.28 0.61
 2 1 -5 5.32 0.54
 2 1 -5 5.78 0.55
 2 -1 5 7.07 0.64
 2 1 -5 6.53 0.58
 2 1 -5 6 0.57
 2 -1 5 6.37 0.58
 2 -1 5 7.34 0.63
 -2 -1 -5 6.23 0.63
 2 1 5 7.57 0.66
 2 -1 -5 6.41 0.62
 -2 1 -5 5.76 0.55
 2 1 5 5.49 0.6
 2 1 5 6.57 0.71
 2 -1 -5 5.97 0.59
 2 -1 -5 5.97 0.61
 -3 1 5 406.31 15.66
 3 1 -5 417.67 15.69
 3 -1 5 397.2 15.51
 3 1 -5 390.58 15.64
 3 -1 5 397.26 15.72
 -3 -1 -5 415.73 15.74
 3 1 -5 383.44 15.39
 3 1 -5 412.67 15.67
 3 -1 5 392.59 15.81
 3 -1 -5 409.67 15.45
 3 -1 -5 373.91 15.66
 3 1 5 396.86 15.88
 3 1 5 414.1 15.59
 3 1 5 392.4 15.79
 -3 -1 5 404.94 15.62
 3 -1 -5 394.43 15.67
 3 -1 -5 401.49 15.71
 -3 1 -5 403.85 15.66
 -4 -1 -5 81.98 3.74
 -4 1 5 81.59 3.67
 4 -1 5 78.4 3.76
 4 -1 5 79.19 3.77
 4 1 -5 74.59 3.64
 4 1 -5 77.55 3.7
 4 1 -5 78.19 3.65
 4 -1 5 78.13 3.67
 4 -1 -5 79.18 3.73
 4 1 5 84.77 3.88
 4 1 5 78.81 3.79
 4 -1 -5 77.46 3.69
 4 -1 -5 84.41 3.71
 4 -1 -5 79.6 3.75
 -4 -1 5 78.52 3.64
 -4 1 -5 83.87 3.7
 4 1 5 73.8 3.69
 5 1 -5 58.78 2.92
 5 1 -5 50.96 2.87
 5 1 -5 56.7 2.9
 5 -1 5 55.55 2.92
 5 -1 5 54.44 2.98
 -5 1 5 54.03 2.85
 -5 -1 -5 57 2.95
 5 -1 5 50.28 2.92
 5 1 5 56.22 3.03
 5 -1 -5 49.63 2.84
 5 -1 -5 60.5 3.03
 5 -1 -5 53.87 2.91
 5 1 5 49.8 2.87
 5 1 5 51.76 2.96
 -5 -1 5 62.92 2.93
 -5 1 -5 53.47 2.9
 5 -1 -5 52.42 2.86
 6 -1 5 103.73 4.89
 -6 -1 -5 101.11 4.89
 6 -1 5 99.26 4.98
 -6 1 5 101.03 4.81
 6 -1 5 92.64 4.9
 6 1 -5 107.15 4.98
 6 1 -5 101.8 4.83
 6 1 -5 101.84 4.87
 6 -1 -5 96.69 4.92
 6 1 5 99.47 4.92
 -6 -1 5 105.19 4.83
 6 1 5 107.96 5.06
 -6 1 -5 105.07 4.9
 6 -1 -5 105.76 4.94
 6 -1 -5 98.54 4.81
 6 1 5 100.14 5.02
 7 1 -5 3.19 0.96
 -7 1 5 1.15 0.74
 -7 -1 -5 2.39 0.86
 7 1 -5 0.87 0.74
 7 -1 5 1.2 0.77
 7 -1 5 0.66 0.63
 7 1 -5 1.63 0.84
 7 1 -5 1.44 0.78
 7 -1 5 1.27 0.74
 7 -1 -5 0.96 0.72
 7 1 5 2.28 0.84
 7 1 5 1.13 0.78
 7 1 5 1.17 0.68
 -7 -1 5 1.48 0.75
 -7 1 -5 1.36 0.76
 7 -1 -5 1.13 0.71
 8 -1 5 34.81 2.62
 8 1 -5 37.09 2.64
 -8 -1 -5 36.13 2.54
 8 -1 5 35.59 2.53
 8 1 -5 32.04 2.45
 8 -1 5 33.94 2.59
 -8 1 5 32.5 2.43
 8 1 -5 38.97 2.69
 8 1 -5 30.11 2.46
 -8 -1 5 30.49 2.35
 8 -1 -5 33.92 2.56
 -8 1 -5 28.87 2.41
 8 1 5 32.84 2.63
 8 1 5 32.63 2.56
 8 -1 -5 32.42 2.46
 8 1 5 31.81 2.55
 9 -1 5 40.4 3.01
 9 -1 5 33.46 2.65
 -9 1 5 35.07 2.63
 9 -1 5 37.58 2.87
 9 1 -5 33.64 2.7
 9 1 -5 35.54 2.78
 9 1 -5 32.75 2.77
 -9 -1 -5 34.75 2.63
 9 1 -5 34.14 2.73
 9 1 -5 39.1 2.8
 9 1 5 35.18 2.81
 9 -1 -5 35.29 2.7
 9 1 5 36.1 2.84
 9 -1 -5 32.12 2.65
 9 1 5 28.01 2.62
 -9 1 -5 37.51 2.7
 10 -1 5 17.27 2.08
 10 1 -5 16.68 2.09
 10 1 -5 14.13 2.08
 -10 -1 -5 9.26 1.65
 10 -1 5 11.12 1.9
 10 -1 5 15.51 1.93
 10 1 -5 14.31 1.87
 10 1 -5 15.57 1.95
 10 -1 -5 15.07 2.17
 10 -1 -5 12.73 1.93
 10 1 5 14.26 1.89
 10 -1 -5 13.78 1.9
 10 1 5 12.25 1.93
 10 -1 -5 12.02 1.99
 10 1 5 15.66 1.95
 -10 1 -5 13.8 1.75
 11 -1 5 64.4 4.47
 11 1 -5 64.19 4.54
 11 1 -5 67.5 4.51
 11 1 -5 73.95 4.78
 -11 -1 -5 67.89 4.43
 11 -1 5 71.45 4.66
 11 1 -5 66.9 4.51
 11 -1 -5 65.3 4.42
 11 -1 -5 73.71 4.74
 11 1 5 65.01 4.48
 11 -1 -5 73.24 4.68
 11 -1 -5 68.64 4.4
 11 1 5 67.31 4.55
 11 1 5 76.63 4.71
 -11 1 -5 72.92 4.53
 11 -1 -5 71.52 4.64
 12 1 -5 13.3 2.29
 -12 -1 -5 9.66 1.91
 12 -1 5 14.32 2.32
 12 -1 5 9.11 1.88
 12 1 -5 11.74 2.18
 12 1 -5 10.67 2.27
 12 -1 -5 11.19 2.12
 12 -1 -5 12.51 2.14
 12 1 5 9.73 2.03
 -12 1 -5 12.4 2.18
 12 1 5 9.74 2.02
 12 -1 -5 9.68 2.1
 12 -1 -5 12.09 2.22
 13 1 -5 101.41 6.28
 -13 -1 -5 103.59 6.1
 13 1 -5 104.49 6.45
 13 1 -5 95.8 6.31
 13 -1 5 91.29 6.01
 13 -1 5 95.53 6.13
 13 -1 -5 102.72 6.28
 13 1 5 104.05 6.35
 13 -1 -5 98.55 6.32
 13 -1 -5 100.83 6.34
 13 1 5 96.45 6.22
 13 -1 -5 87.89 5.94
 -13 1 -5 92.91 5.95
 14 1 -5 -0.15 1.46
 14 1 -5 0.27 1.31
 14 1 -5 -1.33 1.41
 14 -1 5 -0.34 1.51
 -14 1 -5 -0.89 1.4
 14 -1 -5 -0.65 1.25
 14 -1 -5 1.14 1.42
 14 -1 -5 2.05 1.72
 14 1 5 3.86 1.66
 15 1 -5 51.4 4.91
 15 1 -5 61.19 5.19
 15 1 -5 60.99 5.04
 15 -1 -5 48.61 4.75
 15 1 5 59.05 4.97
 15 -1 -5 60.88 5.01
 15 -1 -5 66.98 5.45
 0 2 5 10.34 0.72
 0 2 5 9.58 0.66
 0 -2 -5 10.55 0.72
 0 2 5 9.89 0.69
 0 -2 -5 11.09 0.73
 1 -2 5 46.02 1.94
 -1 -2 -5 44.95 2.13
 1 2 -5 46.49 1.95
 -1 2 5 42.96 2.07
 1 2 -5 49.07 1.88
 1 2 -5 45.96 1.93
 1 2 5 47.33 2.15
 1 2 5 46.5 2.14
 1 -2 -5 47.11 2.12
 -1 2 -5 45.67 1.95
 1 2 5 45.84 2.09
 -1 2 -5 46.67 1.93
 1 -2 -5 46.27 2.12
 -1 2 -5 44.55 1.91
 2 -2 5 154.32 6.23
 2 2 -5 159.62 6.22
 2 -2 5 158.8 6.33
 2 -2 5 156.03 6.3
 -2 -2 -5 166.1 6.47
 2 2 -5 156.12 6.31
 2 -2 5 165.28 6.39
 -2 2 5 165.28 6.41
 2 2 5 161.08 6.54
 2 -2 -5 149.46 6.42
 -2 2 -5 155.59 6.3
 2 -2 -5 157 6.42
 2 2 5 144.74 6.46
 2 2 5 158.04 6.41
 3 2 -5 17.95 1.12
 -3 2 5 17.52 1.19
 3 -2 5 16.87 1.12
 3 -2 5 16.73 1.14
 -3 -2 -5 15.97 1.22
 3 -2 5 19.67 1.24
 3 -2 5 16.72 1.14
 3 2 -5 15.16 1.11
 3 -2 5 17.1 1.2
 3 2 5 17.95 1.25
 -3 2 -5 17.39 1.12
 3 -2 -5 18.11 1.24
 3 -2 -5 18.3 1.23
 3 -2 -5 15.8 1.16
 3 2 5 16.9 1.24
 3 -2 -5 17.44 1.17
 -3 -2 5 15.79 1.1
 3 2 5 14.97 1.26
 4 2 -5 0.14 0.33
 -4 2 5 -0.1 0.35
 4 2 -5 -0.05 0.34
 -4 -2 -5 -0.05 0.37
 4 -2 5 0.3 0.4
 4 -2 5 -0.14 0.4
 4 -2 5 0.36 0.39
 4 2 -5 0.42 0.34
 4 -2 5 0.19 0.44
 4 -2 5 -0.18 0.4
 -4 -2 5 0.18 0.35
 4 2 5 0.6 0.45
 4 -2 -5 -0.28 0.35
 4 -2 -5 0 0.33
 4 -2 -5 0.59 0.39
 4 2 5 0.45 0.45
 4 2 5 0.04 0.41
 4 -2 -5 0.5 0.31
 -4 2 -5 0.27 0.37
 5 -2 5 11.17 1.18
 5 -2 5 12.11 1.22
 5 -2 5 9.45 1.05
 5 2 -5 12.98 1.24
 -5 2 5 11.08 1.14
 5 2 -5 9.14 1.12
 5 2 -5 14.01 1.23
 -5 -2 -5 14.09 1.31
 5 2 -5 12.8 1.28
 5 -2 5 11.82 1.21
 5 -2 5 9.64 1.14
 -5 -2 5 11.06 1.15
 5 -2 -5 14.72 1.25
 5 -2 -5 9.75 1.17
 5 2 5 12.69 1.27
 -5 2 -5 9.27 1.06
 5 -2 -5 10.91 1.22
 5 -2 -5 12.88 1.15
 5 2 5 12.22 1.23
 5 2 5 14.29 1.37
 -6 -2 -5 0.22 0.58
 6 -2 5 2.56 0.75
 6 2 -5 2.27 0.74
 6 2 -5 3.55 0.85
 6 2 -5 1.98 0.66
 6 -2 5 1.47 0.67
 -6 2 5 3.03 0.77
 6 -2 5 1.36 0.66
 6 -2 5 1.31 0.64
 6 2 5 1.44 0.7
 6 -2 -5 2.31 0.78
 6 -2 -5 2.96 0.8
 6 2 5 1.62 0.75
 6 -2 -5 3.05 0.87
 -6 2 -5 2.05 0.7
 -6 -2 5 2.07 0.73
 6 2 5 1.43 0.69
 -7 2 5 5.3 1.03
 7 2 -5 4.19 1.03
 7 2 -5 4.67 1.13
 7 2 -5 6.75 1.22
 7 2 -5 2.93 0.92
 7 2 -5 7.07 1.28
 -7 -2 -5 4.59 1.01
 7 -2 5 5.53 1.13
 7 -2 5 1.76 0.85
 7 -2 5 2.56 0.89
 7 -2 5 4.33 1.05
 -7 -2 5 5.4 1.01
 7 -2 -5 5.54 1.13
 7 2 5 4.01 1.13
 -7 2 -5 5.71 1.08
 7 -2 -5 3.77 1.03
 7 2 5 6.17 1.25
 7 -2 -5 3.81 0.91
 7 2 5 4.29 1.09
 7 -2 -5 5.78 1.1
 8 -2 5 1.6 0.84
 8 -2 5 1.61 0.83
 8 -2 5 1.63 0.85
 8 2 -5 2.44 0.88
 8 2 -5 1.39 0.64
 8 2 -5 1.56 0.67
 -8 -2 -5 2.06 0.92
 8 2 -5 1.87 0.87
 -8 2 5 2.49 0.93
 8 2 -5 2.16 0.85
 8 -2 -5 -0.02 0.68
 8 2 5 3.85 1.13
 -8 -2 5 1.69 0.85
 -8 2 -5 2.12 0.87
 8 2 5 1.63 0.92
 8 2 5 1.48 0.94
 8 -2 -5 0.82 0.71
 -9 -2 -5 6.83 1.38
 9 -2 5 3.65 1.18
 9 2 -5 6.93 1.4
 -9 2 5 7.65 1.41
 9 2 -5 6.19 1.4
 9 2 -5 8.34 1.56
 9 -2 5 5.61 1.31
 9 2 -5 6.98 1.45
 9 -2 5 8.49 1.6
 9 -2 -5 7.43 1.43
 -9 2 -5 8.59 1.44
 9 2 5 9.98 1.65
 9 2 5 6.65 1.37
 9 -2 -5 7.66 1.45
 9 -2 -5 5.59 1.25
 9 2 5 6.35 1.49
 10 2 -5 1.05 0.81
 10 2 -5 1.51 1.06
 10 -2 5 1.34 1.08
 10 -2 5 2.57 1.13
 10 2 -5 4.1 1.21
 10 2 -5 1.68 1.04
 10 -2 5 2.67 1.07
 -10 -2 -5 2.64 0.97
 10 -2 -5 2.47 1.02
 10 -2 -5 3.01 1.09
 -10 2 -5 1.24 0.86
 10 -2 -5 1.92 0.95
 10 2 5 3.45 1.11
 10 2 5 1.74 1.1
 10 2 5 2.63 1.06
 11 2 -5 0.83 1.09
 11 2 -5 -0.05 0.92
 11 -2 5 -0.24 0.94
 -11 -2 -5 -0.63 0.74
 11 2 -5 0.35 0.99
 11 -2 5 -1.23 0.67
 11 -2 -5 -0.41 0.8
 11 2 5 -1.5 0.79
 11 -2 -5 -0.79 0.77
 11 -2 -5 0.08 0.85
 -11 2 -5 -0.38 0.87
 11 2 5 -1.06 0.86
 11 -2 -5 -0.33 0.81
 11 2 5 -1.68 0.76
 11 -2 -5 0.51 0.92
 12 2 -5 1.51 1.25
 12 2 -5 0.6 1.09
 12 2 -5 -1.29 0.94
 12 -2 5 0.92 1.07
 -12 -2 -5 0.41 0.8
 12 -2 5 0.82 1.14
 12 2 5 2.97 1.3
 12 -2 -5 -0.77 0.84
 12 -2 -5 -0.14 1.06
 12 -2 -5 1.81 1.38
 12 -2 -5 1.27 1.07
 12 -2 -5 1.72 1.21
 -12 2 -5 0.36 0.97
 12 2 5 -0.34 0.87
 13 2 -5 1.03 1.45
 13 2 -5 -0.41 1.09
 13 -2 5 1.16 1.27
 -13 -2 -5 0.24 1.02
 13 2 -5 -0.65 1.17
 13 -2 -5 0.55 1.13
 13 2 5 0.71 1.22
 13 -2 -5 -0.15 1.14
 13 -2 -5 0.71 1.28
 -13 2 -5 -0.16 1.04
 13 2 5 2.79 1.58
 13 -2 -5 0.11 1.16
 14 2 -5 0.64 1.49
 14 2 -5 -1.56 1.21
 14 2 -5 0.55 1.31
 14 -2 -5 -0.46 1.52
 14 2 5 1.85 1.69
 14 2 5 0.16 1.43
 -14 2 -5 -0.89 1.14
 14 -2 -5 -1.99 1.25
 14 -2 -5 1.33 1.64
 14 -2 -5 -1.14 1.29
 15 2 -5 3.05 2.03
 15 2 -5 0.85 1.56
 15 2 -5 2.09 1.74
 15 -2 -5 1.25 1.81
 15 -2 -5 0.07 1.88
 15 -2 -5 1.64 2.03
 15 2 5 4.29 2.19
 0 3 -5 -0.19 0.16
 0 3 5 -0.43 0.22
 0 -3 -5 -0.29 0.24
 0 -3 -5 -0.03 0.28
 0 3 -5 -0.11 0.15
 0 3 5 -0.05 0.25
 0 -3 5 -0.32 0.14
 0 3 -5 0.09 0.16
 0 3 -5 -0.15 0.16
 0 3 5 0.24 0.27
 -1 3 5 70.58 3.15
 -1 3 5 70.26 3.13
 1 3 -5 69.37 2.99
 1 3 -5 70.04 2.95
 1 3 -5 74.96 3.05
 1 3 -5 73.43 3.03
 1 -3 5 73.15 2.97
 -1 -3 -5 78.3 3.24
 -1 3 -5 71.56 2.99
 1 -3 -5 72.43 3.18
 1 3 5 71.51 3.15
 1 -3 -5 72.73 3.18
 1 3 5 73.04 3.21
 -1 3 -5 70.4 2.97
 -1 3 -5 69.81 2.93
 -1 3 -5 72.55 2.97
 -1 3 -5 71 2.91
 1 3 5 76.33 3.23
 -2 3 5 22.81 1.34
 2 3 -5 22.48 1.25
 2 3 -5 22.49 1.24
 2 -3 5 22.75 1.23
 2 -3 5 21.61 1.21
 -2 -3 -5 25.31 1.44
 2 3 -5 24.15 1.32
 2 3 -5 21.19 1.28
 2 3 -5 21.74 1.25
 -2 3 -5 22.65 1.23
 2 -3 -5 25.65 1.39
 2 3 5 23.23 1.43
 2 -3 -5 23.76 1.39
 2 3 5 24.13 1.44
 2 3 5 21.27 1.38
 3 -3 5 203.87 8.07
 -3 3 5 200.88 8.14
 -3 -3 -5 200.97 8.2
 3 3 -5 193.03 8.21
 3 -3 5 195.7 7.88
 3 3 -5 188.42 7.94
 3 3 -5 193.33 8.03
 3 3 -5 187.01 8.06
 3 -3 5 199.55 8.03
 3 3 -5 196.98 8.17
 3 -3 5 203.07 7.99
 -3 -3 5 200.13 8.04
 3 -3 -5 199.69 8.17
 3 -3 -5 195.63 8.17
 -3 3 -5 206.54 8.08
 3 3 5 199.31 8.32
 3 3 5 190.25 8.13
 3 -3 -5 214.85 8.23
 3 3 5 214.17 8.34
 4 -3 5 75.96 3.42
 4 3 -5 84.39 3.63
 4 3 -5 74.4 3.55
 -4 -3 -5 72.32 3.6
 4 3 -5 77.13 3.54
 -4 3 5 74.03 3.55
 4 -3 5 72.32 3.49
 4 -3 5 73.9 3.51
 4 3 -5 74.13 3.62
 4 -3 5 71.7 3.48
 4 3 -5 78.48 3.65
 4 3 5 69.15 3.67
 4 -3 -5 84.94 3.61
 4 3 5 70 3.68
 4 -3 -5 74.57 3.6
 4 -3 -5 70.63 3.57
 -4 -3 5 79.36 3.51
 -4 3 -5 72.44 3.51
 4 -3 -5 71.76 3.57
 4 3 5 73.8 3.62
 5 3 -5 16.4 1.44
 5 3 -5 17.01 1.44
 5 -3 5 18 1.44
 5 3 -5 20.08 1.54
 5 -3 5 16.44 1.38
 -5 3 5 17.38 1.4
 5 3 -5 20.14 1.55
 -5 -3 -5 15.79 1.43
 5 -3 5 16.54 1.37
 5 3 -5 17.95 1.41
 -5 3 -5 18.53 1.42
 5 -3 -5 17.12 1.44
 5 3 5 16.12 1.52
 5 -3 -5 17.78 1.45
 -5 -3 5 17.28 1.42
 5 -3 -5 19.99 1.6
 5 3 5 17.26 1.46
 5 3 5 18.64 1.61
 5 -3 -5 15.67 1.36
 -6 -3 -5 103.63 5
 6 -3 5 100.03 4.9
 6 3 -5 106.99 5.11
 6 3 -5 107.91 5.03
 6 -3 5 99.17 4.91
 -6 3 5 112.81 5.01
 6 -3 5 94.79 4.97
 6 -3 5 102.41 4.91
 6 3 -5 95.22 4.95
 -6 -3 5 104.28 4.89
 6 3 5 112.31 5.25
 6 3 5 103.8 5.06
 6 3 5 91.75 5.03
 6 -3 -5 107.62 5.05
 6 -3 -5 93.91 4.85
 -6 3 -5 109.91 4.99
 6 -3 -5 104.85 5.05
 6 -3 -5 109.3 5.05
 7 3 -5 23.86 2.07
 7 -3 5 22.83 1.94
 -7 3 5 25.37 2.02
 7 -3 5 23.12 1.94
 7 3 -5 26.77 2.19
 7 -3 5 25.85 2.13
 7 -3 5 24.21 1.96
 -7 -3 -5 25.05 2.04
 7 3 -5 24.43 2.13
 7 -3 5 25.09 2.06
 7 -3 -5 25.94 2.17
 7 3 5 29.73 2.31
 -7 3 -5 26.66 2.06
 7 3 5 25.86 2.17
 -7 -3 5 21.59 1.86
 7 -3 -5 24.1 2.05
 7 -3 -5 29.06 2.1
 7 -3 -5 30.73 2.2
 7 3 5 29.97 2.29
 8 -3 5 21.43 2.04
 8 -3 5 24.62 2.15
 8 3 -5 23.68 2.12
 8 3 -5 22.79 2.05
 8 -3 5 25.05 2.15
 8 -3 5 24.79 2.19
 -8 3 5 24.67 2.07
 -8 -3 -5 27.03 2.18
 8 3 -5 25.33 2.16
 8 -3 -5 23.96 2.14
 8 3 5 21.54 2.3
 8 3 5 21.22 2.16
 -8 3 -5 21.07 1.91
 8 -3 -5 21.78 1.96
 8 -3 -5 25.01 2.16
 -8 -3 5 21.55 1.98
 8 -3 -5 22.5 2.12
 8 3 5 25.1 2.27
 -9 3 5 49.93 3.27
 -9 -3 -5 45.76 3.22
 9 -3 5 51.88 3.42
 9 3 -5 42.71 3.31
 9 -3 5 54.67 3.38
 9 3 -5 46.16 3.36
 9 -3 5 55 3.49
 9 3 -5 51 3.4
 9 -3 5 47.88 3.3
 9 -3 -5 42.37 3.15
 9 3 5 39.89 3.24
 9 -3 -5 51.81 3.4
 9 3 5 54.66 3.58
 9 -3 -5 47.63 3.28
 -9 3 -5 54.48 3.37
 9 3 5 40.87 3.2
 10 -3 5 0.31 0.86
 10 3 -5 -0.06 0.83
 10 3 -5 0.85 0.92
 10 3 -5 1.43 0.96
 -10 -3 -5 -1.24 0.56
 10 -3 5 0.66 0.79
 -10 3 -5 0.77 0.86
 10 -3 -5 1.56 0.91
 10 -3 -5 0.92 0.81
 10 -3 -5 0.05 0.66
 10 3 5 1.3 0.89
 10 3 5 1.23 0.96
 10 3 5 0.77 0.95
 11 3 -5 107.07 6.33
 11 -3 5 107.63 6.33
 11 3 -5 105.87 6.47
 11 3 -5 125.61 6.85
 -11 -3 -5 119.72 6.37
 11 -3 5 111.49 6.42
 11 -3 -5 121.3 6.41
 11 3 5 111.33 6.55
 11 3 5 129.31 6.79
 11 -3 -5 104.51 6.31
 -11 3 -5 126.16 6.5
 11 -3 -5 112.53 6.32
 11 3 5 121.49 6.5
 12 3 -5 5.99 1.69
 12 3 -5 2.43 1.42
 12 -3 5 3.88 1.55
 12 3 -5 3.91 1.49
 -12 -3 -5 2.87 1.36
 12 -3 5 1.91 1.26
 12 -3 -5 3.28 1.28
 12 -3 -5 3.43 1.34
 12 -3 -5 4.69 1.67
 12 3 5 6.52 1.74
 -12 3 -5 2.18 1.17
 12 3 5 4.29 1.47
 12 -3 -5 1.55 1.33
 13 3 -5 102.3 6.42
 13 3 -5 92.33 6.26
 13 3 -5 92.48 6.08
 13 -3 5 94.79 6.19
 -13 -3 -5 100.53 6.09
 13 3 5 92.75 6.21
 13 3 5 103.9 6.35
 -13 3 -5 90.07 5.85
 13 -3 -5 101.98 6.22
 13 -3 -5 94.85 6.16
 13 -3 -5 100.32 6.29
 13 -3 -5 94.95 6.3
 13 -3 -5 94.15 5.96
 14 3 -5 3.29 1.72
 14 3 -5 2.36 1.74
 14 3 -5 3.47 1.81
 14 -3 -5 -1.14 1.15
 14 -3 -5 2.35 1.6
 14 3 5 1.47 1.63
 14 -3 -5 2.72 1.49
 14 -3 -5 3.95 1.8
 -14 3 -5 -0.27 1.19
 14 3 5 3.48 1.63
 15 3 -5 37.06 4.23
 15 3 -5 45.25 4.48
 15 3 -5 34.91 4.1
 15 -3 -5 40.18 4.01
 15 -3 -5 38.52 4.19
 15 -3 -5 28.11 3.8
 15 3 5 40.92 4.28
 0 4 5 9.17 0.82
 0 4 5 8.61 0.8
 0 4 -5 8.02 0.61
 0 -4 5 8.45 0.59
 0 4 -5 7.64 0.58
 0 4 -5 7.26 0.6
 0 -4 -5 8.16 0.78
 0 -4 -5 8 0.75
 0 4 -5 8.69 0.6
 0 4 5 8.44 0.76
 1 4 -5 24.74 1.36
 -1 4 5 23.63 1.49
 -1 4 5 27.72 1.54
 1 4 -5 25.11 1.37
 1 4 -5 25.89 1.33
 1 -4 5 25.28 1.29
 -1 -4 -5 25.82 1.54
 -1 4 5 26.18 1.48
 1 4 5 27.96 1.54
 1 -4 -5 28.22 1.52
 -1 4 -5 25.4 1.31
 1 -4 -5 28.9 1.55
 -1 4 -5 26.28 1.34
 1 4 5 29.2 1.6
 -1 4 -5 27.12 1.32
 2 -4 5 23.62 1.36
 -2 4 5 22.96 1.44
 2 4 -5 23.92 1.42
 2 4 -5 22.47 1.35
 2 -4 5 25.65 1.34
 -2 -4 -5 26.41 1.56
 2 4 -5 25.39 1.44
 2 -4 -5 25.43 1.5
 2 4 5 26.02 1.54
 -2 4 -5 24.93 1.35
 2 4 5 20.79 1.52
 2 4 5 25.79 1.59
 2 -4 -5 25.51 1.5
 3 -4 5 24.98 1.42
 3 4 -5 22.67 1.49
 -3 4 5 25.31 1.54
 3 -4 5 23.02 1.35
 3 4 -5 23.69 1.46
 -3 -4 -5 19.02 1.47
 3 4 -5 23.53 1.5
 3 -4 5 22.66 1.4
 3 -4 5 23.19 1.42
 3 -4 -5 25.77 1.57
 -3 4 -5 23.02 1.38
 3 4 5 23.11 1.63
 -3 -4 5 23.31 1.41
 3 -4 -5 22.87 1.5
 3 4 5 20.86 1.55
 3 4 5 25.35 1.6
 3 -4 -5 23.85 1.54
 4 -4 5 0.4 0.43
 -4 -4 -5 0.27 0.44
 4 -4 5 -0.09 0.36
 4 4 -5 0.3 0.36
 4 4 -5 0.64 0.39
 -4 4 5 0.1 0.4
 4 -4 5 0.65 0.41
 4 4 -5 0.07 0.31
 4 -4 5 0.19 0.41
 4 -4 -5 0.41 0.43
 4 4 5 0.8 0.51
 4 4 5 1.34 0.55
 4 4 5 0.33 0.49
 4 -4 -5 0.52 0.45
 4 -4 -5 0.53 0.41
 4 -4 -5 0.92 0.5
 -4 4 -5 0.2 0.36
 -4 -4 5 0.41 0.4
 5 -4 5 -0.44 0.41
 5 4 -5 0.08 0.43
 5 -4 5 -0.23 0.45
 -5 -4 -5 -0.13 0.48
 5 -4 5 -0.09 0.47
 5 4 -5 0.15 0.39
 5 4 -5 0.44 0.52
 -5 4 5 0.37 0.48
 5 -4 -5 0.13 0.45
 5 4 5 -0.48 0.43
 5 4 5 -0.18 0.47
 5 -4 -5 0.49 0.5
 -5 4 -5 0.29 0.43
 5 4 5 0.23 0.48
 5 -4 -5 0.24 0.49
 5 -4 -5 0.36 0.52
 -5 -4 5 -0.07 0.47
 6 -4 5 0.3 0.52
[truncated: 776,078 more chars]
