# Supplementary material
Source: MDPI journal article supplement (https://www.mdpi.com/2304-6740/6/1/27)
Supplement: s1 [file s1 › 9bIr_plus_KPF6_Fig1_Grot292.cif]

data_grot292
_audit_creation_date              2017-12-29
_audit_creation_method
;
Olex2 1.2
(compiled 2017.08.10 svn.r3458 for OlexSys, GUI svn.r5381)
;
_shelx_SHELXL_version_number      '2014/7'
_publ_contact_author_address      ?
_publ_contact_author_email        ?
_publ_contact_author_id_orcid     ?
_publ_contact_author_name         ''
_publ_contact_author_phone        ?
_publ_section_references
;
Dolomanov, O.V., Bourhis, L.J., Gildea, R.J, Howard, J.A.K. & Puschmann, H.
 (2009), J. Appl. Cryst. 42, 339-341.

Sheldrick, G.M. (2008). Acta Cryst. A64, 112-122.
;
_chemical_name_common             ?
_chemical_name_systematic
;
 ? 
;
_chemical_formula_moiety
'2(C23 H32 Cl Ir N3), C4 H8 F18 K O P3, C4 H8 O'
_chemical_formula_sum             'C54 H84 Cl2 F18 Ir2 K N6 O2 P3'
_chemical_formula_weight          1778.58
_chemical_melting_point           ?
loop_
  _atom_type_symbol
  _atom_type_description
  _atom_type_scat_dispersion_real
  _atom_type_scat_dispersion_imag
  _atom_type_scat_source
 'C' 'C' 0.0181 0.0091 'International Tables Vol C Tables 4.2.6.8 and 6.1.1.4'
 'H' 'H' 0.0000 0.0000 'International Tables Vol C Tables 4.2.6.8 and 6.1.1.4'
 'Cl' 'Cl' 0.3639 0.7018 'International Tables Vol C Tables 4.2.6.8 and 6.1.1.4'
 'F' 'F' 0.0727 0.0534 'International Tables Vol C Tables 4.2.6.8 and 6.1.1.4'
 'Ir' 'Ir' -4.7710 6.5667
 'International Tables Vol C Tables 4.2.6.8 and 6.1.1.4'
 'K' 'K' 0.3868 1.0657 'International Tables Vol C Tables 4.2.6.8 and 6.1.1.4'
 'N' 'N' 0.0311 0.0180 'International Tables Vol C Tables 4.2.6.8 and 6.1.1.4'
 'O' 'O' 0.0492 0.0322 'International Tables Vol C Tables 4.2.6.8 and 6.1.1.4'
 'P' 'P' 0.2955 0.4335 'International Tables Vol C Tables 4.2.6.8 and 6.1.1.4'

_shelx_space_group_comment
;
The symmetry employed for this shelxl refinement is uniquely defined
by the following loop, which should always be used as a source of
symmetry information in preference to the above space-group names.
They are only intended as comments.
;
_space_group_crystal_system       'orthorhombic'
_space_group_IT_number            61
_space_group_name_H-M_alt         'P b c a'
_space_group_name_Hall            '-P 2ac 2ab'
loop_
  _space_group_symop_operation_xyz
 'x, y, z'
 'x+1/2, -y+1/2, -z'
 '-x, y+1/2, -z+1/2'
 '-x+1/2, -y, z+1/2'
 '-x, -y, -z'
 '-x-1/2, y-1/2, z'
 'x, -y-1/2, z-1/2'
 'x-1/2, y, -z-1/2'

_cell_length_a                    22.6979(12)
_cell_length_b                    20.6402(10)
_cell_length_c                    28.5118(13)
_cell_angle_alpha                 90
_cell_angle_beta                  90
_cell_angle_gamma                 90
_cell_volume                      13357.5(11)
_cell_formula_units_Z             8
_cell_measurement_reflns_used     9893
_cell_measurement_temperature     100(2)
_cell_measurement_theta_max       65.00
_cell_measurement_theta_min       10.49
_shelx_estimated_absorpt_T_max    0.454
_shelx_estimated_absorpt_T_min    0.141
_exptl_absorpt_coefficient_mu     10.412
_exptl_absorpt_correction_T_max   0.4542
_exptl_absorpt_correction_T_min   0.1407
_exptl_absorpt_correction_type    multi-scan
_exptl_absorpt_process_details    SADABS
_exptl_absorpt_special_details    ?
_exptl_crystal_colour             orange
_exptl_crystal_colour_primary     orange
_exptl_crystal_density_diffrn     1.769
_exptl_crystal_density_meas       .
_exptl_crystal_density_method     'not measured'
_exptl_crystal_description        plate
_exptl_crystal_F_000              7040
_exptl_crystal_size_max           0.31
_exptl_crystal_size_mid           0.14
_exptl_crystal_size_min           0.09
_exptl_special_details
;
 ? 
;
_exptl_transmission_factor_max    ?
_exptl_transmission_factor_min    ?
_diffrn_reflns_av_R_equivalents   0.0673
_diffrn_reflns_av_unetI/netI      0.0419
_diffrn_reflns_Laue_measured_fraction_full 0.979
_diffrn_reflns_Laue_measured_fraction_max 0.979
_diffrn_reflns_limit_h_max        25
_diffrn_reflns_limit_h_min        -24
_diffrn_reflns_limit_k_max        24
_diffrn_reflns_limit_k_min        -22
_diffrn_reflns_limit_l_max        32
_diffrn_reflns_limit_l_min        -33
_diffrn_reflns_number             73349
_diffrn_reflns_point_group_measured_fraction_full 0.979
_diffrn_reflns_point_group_measured_fraction_max 0.979
_diffrn_reflns_theta_full         65.104
_diffrn_reflns_theta_max          65.104
_diffrn_reflns_theta_min          3.283
_diffrn_ambient_temperature       100.0
_diffrn_detector_area_resol_mean  ?
_diffrn_measured_fraction_theta_full 0.979
_diffrn_measured_fraction_theta_max 0.979
_diffrn_measurement_device_type   'Bruker APEX-II CCD'
_diffrn_measurement_method        '\f and \w scans'
_diffrn_radiation_monochromator   'graphite'
_diffrn_radiation_type            CuK\a
_diffrn_radiation_wavelength      1.54178
_diffrn_source                    ?
_diffrn_standards_number          0
_reflns_Friedel_coverage          0.000
_reflns_Friedel_fraction_full     .
_reflns_Friedel_fraction_max      .
_reflns_number_gt                 8943
_reflns_number_total              11166
_reflns_special_details
;
 Reflections were merged by SHELXL according to the crystal
 class for the calculation of statistics and refinement.
 
 _reflns_Friedel_fraction is defined as the number of unique
 Friedel pairs measured divided by the number that would be
 possible theoretically, ignoring centric projections and
 systematic absences.
;
_reflns_threshold_expression      'I > 2\s(I)'
_computing_cell_refinement        'Bruker SAINT'
_computing_data_collection        'Bruker APEX2'
_computing_data_reduction         'Bruker SAINT'
_computing_molecular_graphics     'Olex2 (Dolomanov et al., 2009)'
_computing_publication_material   'Olex2 (Dolomanov et al., 2009)'
_computing_structure_refinement   'XL (Sheldrick, 2008)'
_computing_structure_solution     'SHELXS-97 (Sheldrick, 2008)'
_refine_diff_density_max          1.058
_refine_diff_density_min          -1.662
_refine_diff_density_rms          0.121
_refine_ls_extinction_coef        .
_refine_ls_extinction_method      none
_refine_ls_goodness_of_fit_ref    1.038
_refine_ls_hydrogen_treatment     constr
_refine_ls_matrix_type            full
_refine_ls_number_parameters      818
_refine_ls_number_reflns          11166
_refine_ls_number_restraints      22
_refine_ls_R_factor_all           0.0486
_refine_ls_R_factor_gt            0.0356
_refine_ls_restrained_S_all       2.980
_refine_ls_shift/su_max           0.001
_refine_ls_shift/su_mean          0.000
_refine_ls_structure_factor_coef  Fsqd
_refine_ls_weighting_details
'w=1/[\s^2^(Fo^2^)+(0.0348P)^2^+49.7045P] where P=(Fo^2^+2Fc^2^)/3'
_refine_ls_weighting_scheme       calc
_refine_ls_wR_factor_gt           0.0835
_refine_ls_wR_factor_ref          0.0918
_refine_special_details           ?
_olex2_refinement_description
;
1. Fixed Uiso
 At 1.2 times of:
  All C(H) groups, All C(H,H) groups, All N(H) groups
 At 1.5 times of:
  All C(H,H,H) groups
2. Restrained distances
 H4SB-C4S
 0.9 with sigma of 0.001
 H4SA-C4S
 0.9 with sigma of 0.001
 H3SB-C3S
 0.9 with sigma of 0.001
 H3SA-C3S
 0.9 with sigma of 0.001
 H2SA-C2S
 0.9 with sigma of 0.001
 H2SB-C2S
 0.9 with sigma of 0.001
 H2SC-C2SB
 0.9 with sigma of 0.001
 H2SD-C2SB
 0.9 with sigma of 0.001
 H1SA-C1S
 0.9 with sigma of 0.001
 H1SB-C1S
 0.9 with sigma of 0.001
3. Uiso/Uaniso restraints and constraints
Uanis(C2S) \\sim Ueq, Uanis(C2SB) \\sim Ueq: with sigma of 0.01 and sigma for
terminal atoms of 0.02
4. Others
 Fixed Sof: C2S(0.5) H2SA(0.5) H2SB(0.5) C2SB(0.5) H2SC(0.5) H2SD(0.5)
5.a Secondary CH2 refined with riding coordinates:
 C4(H4A,H4B), C4'(H4'A,H4'B), C1S(H1SA,H1SB), C2S(H2SA,H2SB), C2SB(H2SC,H2SD),
 C3S(H3SA,H3SB), C4S(H4SA,H4SB), C5S(H5SA,H5SB), C6S(H6SA,H6SB), C7S(H7SA,H7SB),
  C8S(H8SA,H8SB)
5.b Aromatic/amide H refined with riding coordinates:
 C3(H3), C6(H6), C7(H7), C8(H8), C9(H9), C3'(H3'), C6'(H6'), C7'(H7'),
 C8'(H8'), C9'(H9'), N2(H2), N2'(H2')
5.c Idealised Me refined as rotating group:
 C11(H11A,H11B,H11C), C12(H12A,H12B,H12C), C13(H13A,H13B,H13C), C19(H19A,H19B,
 H19C), C20(H20A,H20B,H20C), C21(H21A,H21B,H21C), C22(H22A,H22B,H22C), C23(H23A,
 H23B,H23C), C11'(H11D,H11E,H11F), C12'(H12D,H12E,H12F), C13'(H13D,H13E,H13F),
 C19'(H19D,H19E,H19F), C20'(H20D,H20E,H20F), C21'(H21D,H21E,H21F), C22'(H22D,
 H22E,H22F), C23'(H23D,H23E,H23F)
;
_atom_sites_solution_hydrogens    geom
_atom_sites_solution_primary      ?
_atom_sites_solution_secondary    ?
loop_
  _atom_site_label
  _atom_site_type_symbol
  _atom_site_fract_x
  _atom_site_fract_y
  _atom_site_fract_z
  _atom_site_U_iso_or_equiv
  _atom_site_adp_type
  _atom_site_occupancy
  _atom_site_site_symmetry_order
  _atom_site_calc_flag
  _atom_site_refinement_flags_posn
  _atom_site_refinement_flags_adp
  _atom_site_refinement_flags_occupancy
  _atom_site_disorder_assembly
  _atom_site_disorder_group
 C1 C 0.1067(2) 0.0411(2) 0.16862(16) 0.0204(11) Uani 1 1 d . . . . .
 C2 C 0.1308(2) -0.0460(2) 0.21330(17) 0.0214(11) Uani 1 1 d . . . . .
 C3 C 0.1629(2) -0.0485(2) 0.17329(17) 0.0242(11) Uani 1 1 d . . . . .
 H3 H 0.1903 -0.0812 0.1649 0.029 Uiso 1 1 calc R . . . .
 C4 C 0.1720(2) 0.0227(2) 0.10091(16) 0.0232(11) Uani 1 1 d . . . . .
 H4A H 0.1414 0.0150 0.0768 0.028 Uiso 1 1 calc R . . . .
 H4B H 0.2060 -0.0057 0.0937 0.028 Uiso 1 1 calc R . . . .
 C5 C 0.1916(2) 0.0928(2) 0.09834(16) 0.0242(11) Uani 1 1 d . . . . .
 C6 C 0.2458(3) 0.1088(3) 0.07999(17) 0.0290(12) Uani 1 1 d . . . . .
 H6 H 0.2719 0.0755 0.0699 0.035 Uiso 1 1 calc R . . . .
 C7 C 0.2625(3) 0.1731(3) 0.07618(19) 0.0335(13) Uani 1 1 d . . . . .
 H7 H 0.2999 0.1844 0.0637 0.040 Uiso 1 1 calc R . . . .
 C8 C 0.2238(3) 0.2206(3) 0.09085(18) 0.0327(13) Uani 1 1 d . . . . .
 H8 H 0.2339 0.2651 0.0883 0.039 Uiso 1 1 calc R . . . .
 C9 C 0.1703(3) 0.2022(2) 0.10934(17) 0.0295(13) Uani 1 1 d . . . . .
 H9 H 0.1442 0.2349 0.1202 0.035 Uiso 1 1 calc R . . . .
 C10 C 0.1271(3) -0.0906(2) 0.25527(17) 0.0256(12) Uani 1 1 d . . . . .
 C11 C 0.1628(3) -0.1526(3) 0.2447(2) 0.0356(14) Uani 1 1 d . . . . .
 H11A H 0.1465 -0.1739 0.2169 0.053 Uiso 1 1 calc GR . . . .
 H11B H 0.1604 -0.1820 0.2716 0.053 Uiso 1 1 calc GR . . . .
 H11C H 0.2040 -0.1410 0.2389 0.053 Uiso 1 1 calc GR . . . .
 C12 C 0.1541(3) -0.0563(3) 0.29804(18) 0.0326(13) Uani 1 1 d . . . . .
 H12A H 0.1939 -0.0415 0.2903 0.049 Uiso 1 1 calc GR . . . .
 H12B H 0.1559 -0.0866 0.3245 0.049 Uiso 1 1 calc GR . . . .
 H12C H 0.1296 -0.0190 0.3066 0.049 Uiso 1 1 calc GR . . . .
 C13 C 0.0628(3) -0.1077(3) 0.2656(2) 0.0362(14) Uani 1 1 d . . . . .
 H13A H 0.0415 -0.0686 0.2752 0.054 Uiso 1 1 calc GR . . . .
 H13B H 0.0612 -0.1399 0.2908 0.054 Uiso 1 1 calc GR . . . .
 H13C H 0.0445 -0.1256 0.2373 0.054 Uiso 1 1 calc GR . . . .
 C14 C 0.0088(3) 0.0698(3) 0.09118(17) 0.0282(12) Uani 1 1 d . . . . .
 C15 C 0.0232(3) 0.1320(3) 0.07114(19) 0.0328(13) Uani 1 1 d . . . . .
 C16 C 0.0031(3) 0.1815(3) 0.10268(19) 0.0303(12) Uani 1 1 d . . . . .
 C17 C -0.0252(2) 0.1502(3) 0.14227(19) 0.0258(12) Uani 1 1 d . . . . .
 C18 C -0.0217(2) 0.0812(2) 0.13508(18) 0.0247(11) Uani 1 1 d . . . . .
 C19 C 0.0161(3) 0.0050(3) 0.0677(2) 0.0414(15) Uani 1 1 d . . . . .
 H19A H -0.0222 -0.0102 0.0564 0.062 Uiso 1 1 calc GR . . . .
 H19B H 0.0320 -0.0262 0.0903 0.062 Uiso 1 1 calc GR . . . .
 H19C H 0.0433 0.0092 0.0412 0.062 Uiso 1 1 calc GR . . . .
 C20 C 0.0543(3) 0.1435(4) 0.02565(19) 0.0451(16) Uani 1 1 d . . . . .
 H20A H 0.0252 0.1501 0.0007 0.068 Uiso 1 1 calc GR . . . .
 H20B H 0.0787 0.1058 0.0181 0.068 Uiso 1 1 calc GR . . . .
 H20C H 0.0793 0.1820 0.0284 0.068 Uiso 1 1 calc GR . . . .
 C21 C 0.0072(3) 0.2528(3) 0.0955(3) 0.0515(18) Uani 1 1 d . . . . .
 H21A H 0.0452 0.2635 0.0812 0.077 Uiso 1 1 calc GR . . . .
 H21B H 0.0038 0.2749 0.1259 0.077 Uiso 1 1 calc GR . . . .
 H21C H -0.0247 0.2671 0.0748 0.077 Uiso 1 1 calc GR . . . .
 C22 C -0.0513(3) 0.1828(3) 0.1840(2) 0.0395(14) Uani 1 1 d . . . . .
 H22A H -0.0923 0.1944 0.1773 0.059 Uiso 1 1 calc GR . . . .
 H22B H -0.0288 0.2220 0.1912 0.059 Uiso 1 1 calc GR . . . .
 H22C H -0.0500 0.1533 0.2109 0.059 Uiso 1 1 calc GR . . . .
 C23 C -0.0477(3) 0.0294(3) 0.1655(2) 0.0353(14) Uani 1 1 d . . . . .
 H23A H -0.0476 0.0438 0.1982 0.053 Uiso 1 1 calc GR . . . .
 H23B H -0.0242 -0.0103 0.1626 0.053 Uiso 1 1 calc GR . . . .
 H23C H -0.0882 0.0206 0.1555 0.053 Uiso 1 1 calc GR . . . .
 C1' C 0.1230(2) 0.1145(2) 0.34020(15) 0.0209(11) Uani 1 1 d . . . . .
 C2' C 0.2112(2) 0.1128(2) 0.30280(18) 0.0235(11) Uani 1 1 d . . . . .
 C3' C 0.2189(3) 0.0869(2) 0.34557(17) 0.0254(11) Uani 1 1 d . . . . .
 H3' H 0.2547 0.0703 0.3580 0.030 Uiso 1 1 calc R . . . .
 C4' C 0.1516(2) 0.0625(2) 0.41475(16) 0.0221(11) Uani 1 1 d . . . . .
 H4'A H 0.1381 0.0980 0.4355 0.026 Uiso 1 1 calc R . . . .
 H4'B H 0.1877 0.0437 0.4286 0.026 Uiso 1 1 calc R . . . .
 C5' C 0.1045(2) 0.0111(2) 0.41205(16) 0.0233(11) Uani 1 1 d . . . . .
 C6' C 0.1134(3) -0.0486(2) 0.43274(17) 0.0283(12) Uani 1 1 d . . . . .
 H6' H 0.1493 -0.0578 0.4486 0.034 Uiso 1 1 calc R . . . .
 C7' C 0.0691(3) -0.0951(3) 0.43005(19) 0.0300(13) Uani 1 1 d . . . . .
 H7' H 0.0742 -0.1366 0.4438 0.036 Uiso 1 1 calc R . . . .
 C8' C 0.0174(3) -0.0795(2) 0.40684(19) 0.0311(13) Uani 1 1 d . . . . .
 H8' H -0.0138 -0.1101 0.4049 0.037 Uiso 1 1 calc R . . . .
 C9' C 0.0116(2) -0.0194(2) 0.38657(17) 0.0233(11) Uani 1 1 d . . . . .
 H9' H -0.0237 -0.0093 0.3702 0.028 Uiso 1 1 calc R . . . .
 C10' C 0.2552(3) 0.1249(3) 0.26406(19) 0.0309(13) Uani 1 1 d . . . . .
 C11' C 0.3147(3) 0.0945(4) 0.2785(2) 0.0512(19) Uani 1 1 d . . . . .
 H11D H 0.3289 0.1153 0.3072 0.077 Uiso 1 1 calc GR . . . .
 H11E H 0.3435 0.1009 0.2533 0.077 Uiso 1 1 calc GR . . . .
 H11F H 0.3094 0.0480 0.2841 0.077 Uiso 1 1 calc GR . . . .
 C12' C 0.2615(4) 0.1972(3) 0.2557(2) 0.0508(19) Uani 1 1 d . . . . .
 H12D H 0.2231 0.2155 0.2473 0.076 Uiso 1 1 calc GR . . . .
 H12E H 0.2895 0.2047 0.2302 0.076 Uiso 1 1 calc GR . . . .
 H12F H 0.2759 0.2180 0.2844 0.076 Uiso 1 1 calc GR . . . .
 C13' C 0.2348(3) 0.0922(3) 0.21849(18) 0.0298(12) Uani 1 1 d . . . . .
 H13D H 0.2321 0.0453 0.2233 0.045 Uiso 1 1 calc GR . . . .
 H13E H 0.2633 0.1013 0.1935 0.045 Uiso 1 1 calc GR . . . .
 H13F H 0.1961 0.1092 0.2095 0.045 Uiso 1 1 calc GR . . . .
 C14' C 0.0223(3) 0.1797(3) 0.42136(19) 0.0349(14) Uani 1 1 d . . . . .
 C15' C -0.0312(3) 0.1456(2) 0.41263(18) 0.0307(13) Uani 1 1 d . . . . .
 C16' C -0.0522(3) 0.1624(3) 0.36840(18) 0.0291(12) Uani 1 1 d . . . . .
 C17' C -0.0104(3) 0.2074(2) 0.34804(18) 0.0305(13) Uani 1 1 d . . . . .
 C18' C 0.0339(3) 0.2203(2) 0.3812(2) 0.0398(16) Uani 1 1 d . . . . .
 C19' C 0.0548(4) 0.1833(4) 0.4671(3) 0.088(4) Uani 1 1 d . . . . .
 H19D H 0.0336 0.2119 0.4887 0.133 Uiso 1 1 calc GR . . . .
 H19E H 0.0945 0.2004 0.4617 0.133 Uiso 1 1 calc GR . . . .
 H19F H 0.0576 0.1399 0.4808 0.133 Uiso 1 1 calc GR . . . .
 C20' C -0.0601(4) 0.0999(3) 0.4465(3) 0.071(3) Uani 1 1 d . . . . .
 H20D H -0.0869 0.1241 0.4670 0.107 Uiso 1 1 calc GR . . . .
 H20E H -0.0299 0.0785 0.4656 0.107 Uiso 1 1 calc GR . . . .
 H20F H -0.0825 0.0671 0.4291 0.107 Uiso 1 1 calc GR . . . .
 C21' C -0.1080(3) 0.1386(4) 0.3454(3) 0.067(3) Uani 1 1 d . . . . .
 H21D H -0.1226 0.1004 0.3623 0.101 Uiso 1 1 calc GR . . . .
 H21E H -0.0999 0.1269 0.3128 0.101 Uiso 1 1 calc GR . . . .
 H21F H -0.1379 0.1729 0.3463 0.101 Uiso 1 1 calc GR . . . .
 C22' C -0.0211(4) 0.2414(4) 0.3024(2) 0.074(3) Uani 1 1 d . . . . .
 H22D H -0.0399 0.2834 0.3084 0.111 Uiso 1 1 calc GR . . . .
 H22E H -0.0469 0.2149 0.2827 0.111 Uiso 1 1 calc GR . . . .
 H22F H 0.0165 0.2483 0.2863 0.111 Uiso 1 1 calc GR . . . .
 C23' C 0.0823(4) 0.2680(3) 0.3761(4) 0.081(3) Uani 1 1 d . . . . .
 H23D H 0.0915 0.2737 0.3428 0.122 Uiso 1 1 calc GR . . . .
 H23E H 0.1173 0.2522 0.3927 0.122 Uiso 1 1 calc GR . . . .
 H23F H 0.0700 0.3096 0.3895 0.122 Uiso 1 1 calc GR . . . .
 C1S C 0.1766(4) 0.6937(4) 0.4036(3) 0.068(2) Uani 1 1 d D . . . .
 H1SA H 0.1389 0.6845 0.4198 0.082 Uiso 1 1 calc DR . . A 1
 H1SB H 0.1788 0.6672 0.3748 0.082 Uiso 1 1 calc DR . . A 1
 C2S C 0.1819(8) 0.7674(8) 0.3918(5) 0.049(4) Uani 0.5 1 d D U P B 1
 H2SA H 0.2119 0.7757 0.3673 0.059 Uiso 0.5 1 calc DR . P B 1
 H2SB H 0.1437 0.7861 0.3819 0.059 Uiso 0.5 1 calc DR . P B 1
 C2SB C 0.1578(9) 0.7566(8) 0.4113(7) 0.065(5) Uani 0.5 1 d D U P B 2
 H2SC H 0.1195 0.7560 0.4279 0.078 Uiso 0.5 1 calc DR . P B 2
 H2SD H 0.1521 0.7788 0.3808 0.078 Uiso 0.5 1 calc DR . P B 2
 C3S C 0.2011(4) 0.7921(4) 0.4393(4) 0.088(3) Uani 1 1 d D . . . .
 H3SA H 0.1702 0.7872 0.4636 0.106 Uiso 1 1 calc DR . . B 1
 H3SB H 0.2154 0.8374 0.4384 0.106 Uiso 1 1 calc DR . . B 1
 C4S C 0.2530(4) 0.7407(4) 0.4446(4) 0.080(3) Uani 1 1 d D . . . .
 H4SA H 0.2854 0.7502 0.4224 0.096 Uiso 1 1 calc DR . . . .
 H4SB H 0.2690 0.7408 0.4769 0.096 Uiso 1 1 calc DR . . . .
 C5S C 0.1643(4) 0.3847(4) 0.2805(3) 0.069(2) Uani 1 1 d . . . . .
 H5SA H 0.1582 0.4055 0.3114 0.083 Uiso 1 1 calc R . . . .
 H5SB H 0.1849 0.3430 0.2855 0.083 Uiso 1 1 calc R . . . .
 C6S C 0.1062(4) 0.3731(4) 0.2572(3) 0.071(2) Uani 1 1 d . . . . .
 H6SA H 0.1000 0.3262 0.2517 0.086 Uiso 1 1 calc R . . . .
 H6SB H 0.0736 0.3897 0.2768 0.086 Uiso 1 1 calc R . . . .
 C7S C 0.1091(4) 0.4087(5) 0.2119(3) 0.081(3) Uani 1 1 d . . . . .
 H7SA H 0.0949 0.3813 0.1858 0.097 Uiso 1 1 calc R . . . .
 H7SB H 0.0851 0.4487 0.2132 0.097 Uiso 1 1 calc R . . . .
 C8S C 0.1716(4) 0.4241(5) 0.2063(3) 0.081(3) Uani 1 1 d . . . . .
 H8SA H 0.1909 0.3910 0.1864 0.097 Uiso 1 1 calc R . . . .
 H8SB H 0.1761 0.4668 0.1909 0.097 Uiso 1 1 calc R . . . .
 Cl1 Cl 0.09405(6) 0.18782(5) 0.20432(4) 0.0249(3) Uani 1 1 d . . . . .
 Cl1' Cl 0.00899(6) 0.06495(5) 0.28892(4) 0.0228(3) Uani 1 1 d . . . . .
 F1 F 0.23886(17) 0.46608(18) 0.46287(13) 0.0478(9) Uani 1 1 d . . . . .
 F2 F 0.17709(19) 0.52104(16) 0.41534(12) 0.0495(10) Uani 1 1 d . . . . .
 F3 F 0.2138(2) 0.4235(2) 0.39318(13) 0.0596(11) Uani 1 1 d . . . . .
 F4 F 0.17908(19) 0.37866(16) 0.45985(13) 0.0478(9) Uani 1 1 d . . . . .
 F5 F 0.14369(18) 0.47688(16) 0.48245(12) 0.0458(9) Uani 1 1 d . . . . .
 F6 F 0.11754(19) 0.43258(18) 0.41249(15) 0.0584(11) Uani 1 1 d . . . . .
 F7 F 0.30363(18) 0.52683(16) 0.53491(13) 0.0501(10) Uani 1 1 d . . . . .
 F8 F 0.32003(16) 0.63279(14) 0.52142(11) 0.0356(8) Uani 1 1 d . . . . .
 F9 F 0.39674(17) 0.56409(17) 0.53312(12) 0.0465(9) Uani 1 1 d . . . . .
 F10 F 0.37369(17) 0.63896(16) 0.58835(12) 0.0439(9) Uani 1 1 d . . . . .
 F11 F 0.35730(18) 0.53265(16) 0.60205(11) 0.0457(9) Uani 1 1 d . . . . .
 F12 F 0.27995(17) 0.60093(17) 0.58996(12) 0.0440(9) Uani 1 1 d . . . . .
 F13 F 0.17125(17) 0.69913(16) 0.53730(13) 0.0464(9) Uani 1 1 d . . . . .
 F14 F 0.11873(18) 0.71702(18) 0.60332(13) 0.0531(10) Uani 1 1 d . . . . .
 F15 F 0.13185(18) 0.61507(16) 0.57596(12) 0.0457(9) Uani 1 1 d . . . . .
 F16 F 0.0816(2) 0.74634(18) 0.53270(14) 0.0570(11) Uani 1 1 d . . . . .
 F17 F 0.09499(16) 0.64415(17) 0.50638(11) 0.0432(8) Uani 1 1 d . . . . .
 F18 F 0.04137(17) 0.66283(18) 0.57232(13) 0.0488(9) Uani 1 1 d . . . . .
 Ir1 Ir 0.06804(2) 0.11915(2) 0.13877(2) 0.01903(7) Uani 1 1 d . . . . .
 Ir1' Ir 0.03721(2) 0.11896(2) 0.36055(2) 0.01698(7) Uani 1 1 d . . . . .
 K1 K 0.20682(6) 0.58938(6) 0.49798(4) 0.0346(3) Uani 1 1 d . . . . .
 N1 N 0.1533(2) 0.13955(19) 0.11275(13) 0.0217(9) Uani 1 1 d . . . . .
 N2 N 0.0966(2) 0.00981(17) 0.20951(13) 0.0203(9) Uani 1 1 d . . . . .
 H2 H 0.0716 0.0231 0.2310 0.024 Uiso 1 1 calc R . . . .
 N3 N 0.1482(2) 0.00536(19) 0.14704(13) 0.0217(9) Uani 1 1 d . . . . .
 N1' N 0.05488(19) 0.02599(18) 0.38927(13) 0.0188(9) Uani 1 1 d . . . . .
 N2' N 0.1514(2) 0.12964(18) 0.30045(13) 0.0221(9) Uani 1 1 d . . . . .
 H2' H 0.1346 0.1478 0.2759 0.027 Uiso 1 1 calc R . . . .
 N3' N 0.1651(2) 0.0887(2) 0.36812(13) 0.0235(10) Uani 1 1 d . . . . .
 O1S O 0.2258(2) 0.6803(2) 0.43400(14) 0.0473(11) Uani 1 1 d . . . . .
 O2S O 0.1982(3) 0.4253(3) 0.25136(17) 0.0698(16) Uani 1 1 d . . . . .
 P1 P 0.17801(7) 0.44873(7) 0.43711(5) 0.0321(3) Uani 1 1 d . . . . .
 P2 P 0.33926(7) 0.58310(6) 0.56220(5) 0.0281(3) Uani 1 1 d . . . . .
 P3 P 0.10568(7) 0.68089(7) 0.55532(5) 0.0319(3) Uani 1 1 d . . . . .

loop_
  _atom_site_aniso_label
  _atom_site_aniso_U_11
  _atom_site_aniso_U_22
  _atom_site_aniso_U_33
  _atom_site_aniso_U_23
  _atom_site_aniso_U_13
  _atom_site_aniso_U_12
 C1 0.026(3) 0.014(2) 0.021(2) -0.0027(18) -0.002(2) -0.002(2)
 C2 0.025(3) 0.015(2) 0.025(2) -0.0030(19) -0.006(2) 0.003(2)
 C3 0.029(3) 0.020(2) 0.023(2) -0.0040(19) -0.005(2) 0.004(2)
 C4 0.024(3) 0.026(3) 0.019(2) -0.0033(19) 0.003(2) 0.000(2)
 C5 0.030(3) 0.025(3) 0.018(2) -0.0032(19) 0.001(2) -0.001(2)
 C6 0.031(3) 0.032(3) 0.024(3) 0.001(2) 0.006(2) 0.007(2)
 C7 0.037(4) 0.033(3) 0.031(3) 0.004(2) 0.008(3) -0.005(3)
 C8 0.040(4) 0.028(3) 0.029(3) 0.004(2) 0.005(3) -0.004(3)
 C9 0.045(4) 0.023(3) 0.020(2) 0.003(2) 0.001(2) 0.004(2)
 C10 0.035(3) 0.014(2) 0.028(3) 0.0001(19) -0.002(2) 0.004(2)
 C11 0.048(4) 0.022(3) 0.036(3) -0.001(2) 0.002(3) 0.011(3)
 C12 0.041(4) 0.031(3) 0.025(3) 0.004(2) -0.006(2) 0.004(3)
 C13 0.040(4) 0.027(3) 0.041(3) 0.006(2) 0.005(3) 0.001(3)
 C14 0.025(3) 0.037(3) 0.023(2) -0.006(2) -0.008(2) 0.002(2)
 C15 0.026(3) 0.049(4) 0.024(3) 0.011(2) -0.006(2) 0.006(3)
 C16 0.021(3) 0.035(3) 0.035(3) 0.008(2) -0.001(2) 0.007(2)
 C17 0.014(3) 0.024(3) 0.039(3) -0.004(2) 0.002(2) 0.016(2)
 C18 0.013(3) 0.026(3) 0.034(3) 0.000(2) -0.005(2) -0.006(2)
 C19 0.039(4) 0.046(4) 0.039(3) -0.020(3) -0.008(3) 0.001(3)
 C20 0.039(4) 0.076(5) 0.020(3) 0.013(3) -0.004(3) 0.006(3)
 C21 0.044(4) 0.035(3) 0.075(5) 0.023(3) 0.004(4) 0.013(3)
 C22 0.037(4) 0.045(4) 0.036(3) -0.008(3) 0.006(3) 0.005(3)
 C23 0.033(4) 0.042(3) 0.031(3) 0.004(2) -0.005(3) -0.007(3)
 C1' 0.034(3) 0.016(2) 0.013(2) 0.0016(17) -0.005(2) -0.003(2)
 C2' 0.023(3) 0.024(3) 0.024(3) -0.0029(19) 0.000(2) -0.006(2)
 C3' 0.024(3) 0.029(3) 0.024(2) -0.002(2) -0.002(2) -0.004(2)
 C4' 0.023(3) 0.024(2) 0.020(2) 0.0020(19) -0.007(2) 0.001(2)
 C5' 0.030(3) 0.022(2) 0.017(2) -0.0003(19) 0.001(2) 0.002(2)
 C6' 0.038(4) 0.024(3) 0.022(2) 0.007(2) -0.002(2) 0.003(2)
 C7' 0.037(4) 0.020(3) 0.033(3) 0.011(2) -0.002(3) 0.002(2)
 C8' 0.038(4) 0.020(3) 0.035(3) 0.004(2) 0.005(3) -0.005(2)
 C9' 0.024(3) 0.021(2) 0.026(2) -0.0016(19) 0.004(2) 0.001(2)
 C10' 0.027(3) 0.042(3) 0.024(3) -0.006(2) 0.003(2) -0.013(3)
 C11' 0.022(4) 0.101(6) 0.031(3) -0.008(3) 0.005(3) -0.008(3)
 C12' 0.070(5) 0.041(3) 0.042(3) -0.015(3) 0.028(3) -0.031(3)
 C13' 0.028(3) 0.036(3) 0.025(3) -0.007(2) 0.001(2) -0.001(2)
 C14' 0.054(4) 0.024(3) 0.026(3) -0.014(2) -0.009(3) 0.017(3)
 C15' 0.052(4) 0.018(2) 0.023(3) -0.001(2) 0.016(3) 0.006(2)
 C16' 0.030(3) 0.029(3) 0.029(3) -0.017(2) 0.003(2) 0.008(2)
 C17' 0.047(4) 0.021(3) 0.023(3) 0.004(2) 0.009(3) 0.017(3)
 C18' 0.046(4) 0.012(2) 0.062(4) -0.011(2) 0.011(3) 0.002(2)
 C19' 0.118(8) 0.097(6) 0.050(4) -0.055(4) -0.045(5) 0.074(6)
 C20' 0.122(8) 0.033(4) 0.059(5) 0.009(3) 0.060(5) 0.009(4)
 C21' 0.026(4) 0.090(6) 0.085(6) -0.056(5) -0.013(4) 0.011(4)
 C22' 0.105(7) 0.076(5) 0.041(4) 0.034(4) 0.026(4) 0.063(5)
 C23' 0.052(5) 0.026(4) 0.166(10) -0.029(5) 0.033(6) -0.017(3)
 C1S 0.094(7) 0.061(5) 0.049(4) -0.007(4) -0.030(4) 0.016(5)
 C2S 0.058(8) 0.055(7) 0.035(6) 0.018(5) 0.003(6) 0.010(6)
 C2SB 0.056(8) 0.061(8) 0.078(8) -0.009(7) -0.029(7) 0.012(7)
 C3S 0.085(7) 0.041(4) 0.138(9) 0.010(5) -0.025(7) -0.002(4)
 C4S 0.059(6) 0.065(5) 0.116(7) 0.046(5) -0.027(5) -0.021(4)
 C5S 0.072(6) 0.089(6) 0.046(4) 0.024(4) 0.004(4) -0.004(5)
 C6S 0.072(6) 0.086(6) 0.056(5) -0.003(4) 0.006(4) -0.025(5)
 C7S 0.052(6) 0.136(8) 0.056(5) 0.022(5) -0.010(4) -0.013(5)
 C8S 0.072(7) 0.123(8) 0.047(4) 0.011(5) -0.012(4) -0.032(6)
 Cl1 0.0357(8) 0.0197(5) 0.0192(5) -0.0018(4) -0.0001(5) 0.0019(5)
 Cl1' 0.0265(7) 0.0236(6) 0.0184(5) -0.0042(4) -0.0017(5) 0.0007(5)
 F1 0.038(2) 0.054(2) 0.051(2) -0.0068(17) -0.0051(17) -0.0039(17)
 F2 0.071(3) 0.0358(19) 0.0419(19) 0.0048(15) 0.0076(19) -0.0016(18)
 F3 0.082(3) 0.061(2) 0.0362(19) -0.0118(17) 0.017(2) 0.007(2)
 F4 0.062(3) 0.0334(19) 0.048(2) 0.0031(15) 0.0029(19) 0.0034(17)
 F5 0.058(3) 0.0372(18) 0.0418(19) -0.0042(15) 0.0194(18) -0.0036(17)
 F6 0.052(3) 0.048(2) 0.076(3) -0.0087(19) -0.024(2) -0.0018(19)
 F7 0.063(3) 0.0302(18) 0.057(2) 0.0029(16) -0.0223(19) -0.0112(17)
 F8 0.042(2) 0.0319(17) 0.0329(17) 0.0111(13) -0.0025(15) 0.0018(15)
 F9 0.049(2) 0.045(2) 0.0449(19) 0.0051(15) 0.0080(17) 0.0142(17)
 F10 0.045(2) 0.0354(18) 0.051(2) -0.0081(15) -0.0164(18) -0.0019(16)
 F11 0.063(3) 0.0415(19) 0.0326(17) 0.0097(14) -0.0076(17) 0.0114(18)
 F12 0.040(2) 0.050(2) 0.0421(19) 0.0117(16) 0.0102(17) 0.0072(17)
 F13 0.047(2) 0.0341(18) 0.058(2) -0.0153(16) 0.0109(19) -0.0065(16)
 F14 0.054(3) 0.057(2) 0.048(2) -0.0270(18) -0.0023(19) 0.0097(19)
 F15 0.057(3) 0.0398(19) 0.0405(19) 0.0037(14) 0.0076(18) 0.0165(17)
 F16 0.072(3) 0.043(2) 0.056(2) 0.0065(17) 0.013(2) 0.029(2)
 F17 0.043(2) 0.050(2) 0.0366(18) -0.0151(15) -0.0039(16) 0.0099(17)
 F18 0.037(2) 0.059(2) 0.051(2) -0.0096(17) 0.0085(17) 0.0029(18)
 Ir1 0.02321(14) 0.01725(12) 0.01663(11) 0.00024(7) 0.00010(8) 0.00260(8)
 Ir1' 0.02286(14) 0.01370(11) 0.01437(11) 0.00098(7) -0.00055(8) 0.00034(8)
 K1 0.0407(8) 0.0309(6) 0.0321(6) -0.0052(5) 0.0010(5) 0.0036(5)
 N1 0.026(3) 0.023(2) 0.0163(19) 0.0007(16) 0.0003(17) 0.0015(18)
 N2 0.029(3) 0.0119(18) 0.0204(19) -0.0034(15) 0.0007(18) -0.0001(17)
 N3 0.027(3) 0.021(2) 0.0179(19) -0.0042(16) 0.0004(18) -0.0035(18)
 N1' 0.021(2) 0.018(2) 0.0177(19) -0.0004(15) 0.0013(17) 0.0008(17)
 N2' 0.031(3) 0.020(2) 0.0161(19) 0.0000(15) -0.0033(18) -0.0026(18)
 N3' 0.028(3) 0.024(2) 0.019(2) 0.0006(16) -0.0005(18) -0.0093(19)
 O1S 0.061(3) 0.047(3) 0.034(2) 0.0018(18) -0.004(2) 0.012(2)
 O2S 0.067(4) 0.093(4) 0.049(3) 0.012(3) -0.016(3) -0.023(3)
 P1 0.0369(9) 0.0332(7) 0.0262(7) -0.0019(6) 0.0017(6) -0.0009(6)
 P2 0.0333(9) 0.0252(7) 0.0257(6) 0.0042(5) -0.0032(6) -0.0010(6)
 P3 0.0372(9) 0.0268(7) 0.0318(7) -0.0061(6) 0.0004(6) 0.0044(6)

_geom_special_details
;
 All esds (except the esd in the dihedral angle between two l.s. planes)
 are estimated using the full covariance matrix.  The cell esds are taken
 into account individually in the estimation of esds in distances, angles
 and torsion angles; correlations between esds in cell parameters are only
 used when they are defined by crystal symmetry.  An approximate (isotropic)
 treatment of cell esds is used for estimating esds involving l.s. planes.
;
loop_
  _geom_bond_atom_site_label_1
  _geom_bond_atom_site_label_2
  _geom_bond_distance
  _geom_bond_site_symmetry_2
  _geom_bond_publ_flag
 C1 Ir1 2.022(5) . ?
 C1 N2 1.353(6) . ?
 C1 N3 1.347(7) . ?
 C2 C3 1.355(7) . ?
 C2 C10 1.512(7) . ?
 C2 N2 1.393(6) . ?
 C3 N3 1.381(6) . ?
 C4 C5 1.515(7) . ?
 C4 N3 1.466(6) . ?
 C5 C6 1.378(8) . ?
 C5 N1 1.362(7) . ?
 C6 C7 1.385(8) . ?
 C7 C8 1.380(8) . ?
 C8 C9 1.377(8) . ?
 C9 N1 1.353(7) . ?
 C10 C11 1.543(7) . ?
 C10 C12 1.538(7) . ?
 C10 C13 1.529(8) . ?
 C14 C15 1.442(8) . ?
 C14 C18 1.450(8) . ?
 C14 C19 1.506(7) . ?
 C14 Ir1 2.164(5) . ?
 C15 C16 1.436(8) . ?
 C15 C20 1.495(8) . ?
 C15 Ir1 2.196(5) . ?
 C16 C17 1.451(8) . ?
 C16 C21 1.489(8) . ?
 C16 Ir1 2.211(5) . ?
 C17 C18 1.441(7) . ?
 C17 C22 1.490(7) . ?
 C17 Ir1 2.213(5) . ?
 C18 C23 1.498(7) . ?
 C18 Ir1 2.185(5) . ?
 C1' Ir1' 2.034(6) . ?
 C1' N2' 1.341(6) . ?
 C1' N3' 1.352(7) . ?
 C2' C3' 1.343(7) . ?
 C2' C10' 1.509(7) . ?
 C2' N2' 1.403(7) . ?
 C3' N3' 1.382(7) . ?
 C4' C5' 1.508(7) . ?
 C4' N3' 1.468(6) . ?
 C5' C6' 1.382(7) . ?
 C5' N1' 1.335(7) . ?
 C6' C7' 1.394(8) . ?
 C7' C8' 1.385(8) . ?
 C8' C9' 1.375(7) . ?
 C9' N1' 1.360(7) . ?
 C10' C11' 1.545(9) . ?
 C10' C12' 1.517(8) . ?
 C10' C13' 1.535(7) . ?
 C14' C15' 1.425(9) . ?
 C14' C18' 1.445(9) . ?
 C14' C19' 1.501(8) . ?
 C14' Ir1' 2.166(5) . ?
 C15' C16' 1.392(8) . ?
 C15' C20' 1.501(8) . ?
 C15' Ir1' 2.218(5) . ?
 C16' C17' 1.449(8) . ?
 C16' C21' 1.509(9) . ?
 C16' Ir1' 2.229(6) . ?
 C17' C18' 1.404(9) . ?
 C17' C22' 1.499(8) . ?
 C17' Ir1' 2.150(5) . ?
 C18' C23' 1.481(9) . ?
 C18' Ir1' 2.175(5) . ?
 C1S C2S 1.563(17) . ?
 C1S C2SB 1.384(18) . ?
 C1S K1 3.513(7) . ?
 C1S O1S 1.441(9) . ?
 C2S C3S 1.514(18) . ?
 C2SB C3S 1.464(18) . ?
 C3S C4S 1.593(12) . ?
 C4S O1S 1.424(9) . ?
 C5S C6S 1.495(12) . ?
 C5S O2S 1.409(9) . ?
 C6S C7S 1.486(11) . ?
 C7S C8S 1.462(12) . ?
 C8S O2S 1.420(9) . ?
 Cl1 Ir1 2.4186(11) . ?
 Cl1' Ir1' 2.4133(11) . ?
 F1 K1 2.830(4) . ?
 F1 P1 1.605(4) . ?
 F2 K1 2.828(4) . ?
 F2 P1 1.616(4) . ?
 F3 P1 1.582(4) . ?
 F4 P1 1.585(4) . ?
 F5 K1 2.764(4) . ?
 F5 P1 1.617(3) . ?
 F6 P1 1.577(4) . ?
 F7 K1 2.758(4) . ?
 F7 P2 1.615(4) . ?
 F8 K1 2.802(4) . ?
 F8 P2 1.611(3) . ?
 F9 P2 1.595(4) . ?
 F10 P2 1.580(3) . ?
 F11 P2 1.595(3) . ?
 F12 K1 3.113(4) . ?
 F12 P2 1.604(4) . ?
 F13 K1 2.653(3) . ?
 F13 P3 1.619(4) . ?
 F14 P3 1.586(4) . ?
 F15 K1 2.850(4) . ?
 F15 P3 1.595(3) . ?
 F16 P3 1.593(4) . ?
 F17 K1 2.789(4) . ?
 F17 P3 1.607(3) . ?
 F18 P3 1.583(4) . ?
 Ir1 N1 2.115(4) . ?
 Ir1' N1' 2.125(4) . ?
 K1 O1S 2.653(4) . ?
 K1 P1 3.4448(18) . ?
 K1 P3 3.3928(19) . ?

loop_
  _geom_angle_atom_site_label_1
  _geom_angle_atom_site_label_2
  _geom_angle_atom_site_label_3
  _geom_angle
  _geom_angle_site_symmetry_1
  _geom_angle_site_symmetry_3
  _geom_angle_publ_flag
 N2 C1 Ir1 132.1(4) . . ?
 N3 C1 Ir1 123.3(3) . . ?
 N3 C1 N2 104.5(4) . . ?
 C3 C2 C10 132.4(5) . . ?
 C3 C2 N2 105.4(4) . . ?
 N2 C2 C10 122.3(4) . . ?
 C2 C3 N3 107.3(4) . . ?
 N3 C4 C5 112.6(4) . . ?
 C6 C5 C4 120.6(5) . . ?
 N1 C5 C4 118.3(5) . . ?
 N1 C5 C6 121.0(5) . . ?
 C5 C6 C7 120.2(5) . . ?
 C8 C7 C6 118.9(6) . . ?
 C9 C8 C7 118.8(5) . . ?
 N1 C9 C8 122.8(5) . . ?
 C2 C10 C11 108.7(4) . . ?
 C2 C10 C12 109.0(4) . . ?
 C2 C10 C13 110.2(4) . . ?
 C12 C10 C11 109.1(5) . . ?
 C13 C10 C11 110.3(5) . . ?
 C13 C10 C12 109.5(5) . . ?
 C15 C14 C18 107.9(5) . . ?
 C15 C14 C19 126.1(5) . . ?
 C15 C14 Ir1 71.9(3) . . ?
 C18 C14 C19 125.4(5) . . ?
 C18 C14 Ir1 71.3(3) . . ?
 C19 C14 Ir1 128.9(4) . . ?
 C14 C15 C20 126.3(6) . . ?
 C14 C15 Ir1 69.5(3) . . ?
 C16 C15 C14 108.2(5) . . ?
 C16 C15 C20 125.5(5) . . ?
 C16 C15 Ir1 71.5(3) . . ?
 C20 C15 Ir1 124.2(4) . . ?
 C15 C16 C17 108.1(5) . . ?
 C15 C16 C21 126.7(5) . . ?
 C15 C16 Ir1 70.5(3) . . ?
 C17 C16 C21 125.1(5) . . ?
 C17 C16 Ir1 70.9(3) . . ?
 C21 C16 Ir1 126.7(4) . . ?
 C16 C17 C22 126.6(5) . . ?
 C16 C17 Ir1 70.8(3) . . ?
 C18 C17 C16 107.8(4) . . ?
 C18 C17 C22 125.6(5) . . ?
 C18 C17 Ir1 69.8(3) . . ?
 C22 C17 Ir1 123.2(4) . . ?
 C14 C18 C23 124.9(5) . . ?
 C14 C18 Ir1 69.8(3) . . ?
 C17 C18 C14 108.0(5) . . ?
 C17 C18 C23 127.0(5) . . ?
 C17 C18 Ir1 71.9(3) . . ?
 C23 C18 Ir1 126.5(4) . . ?
 N2' C1' Ir1' 133.7(4) . . ?
 N2' C1' N3' 104.5(5) . . ?
 N3' C1' Ir1' 121.7(3) . . ?
 C3' C2' C10' 130.1(5) . . ?
 C3' C2' N2' 105.6(5) . . ?
 N2' C2' C10' 124.3(5) . . ?
 C2' C3' N3' 107.2(5) . . ?
 N3' C4' C5' 111.1(4) . . ?
 C6' C5' C4' 120.1(5) . . ?
 N1' C5' C4' 117.5(4) . . ?
 N1' C5' C6' 122.4(5) . . ?
 C5' C6' C7' 119.0(5) . . ?
 C8' C7' C6' 118.6(5) . . ?
 C9' C8' C7' 119.4(5) . . ?
 N1' C9' C8' 122.0(5) . . ?
 C2' C10' C11' 108.4(5) . . ?
 C2' C10' C12' 109.9(5) . . ?
 C2' C10' C13' 110.4(4) . . ?
 C12' C10' C11' 111.0(6) . . ?
 C12' C10' C13' 109.1(5) . . ?
 C13' C10' C11' 108.1(5) . . ?
 C15' C14' C18' 107.7(5) . . ?
 C15' C14' C19' 126.6(7) . . ?
 C15' C14' Ir1' 73.0(3) . . ?
 C18' C14' C19' 124.8(7) . . ?
 C18' C14' Ir1' 70.9(3) . . ?
 C19' C14' Ir1' 130.4(4) . . ?
 C14' C15' C20' 124.8(6) . . ?
 C14' C15' Ir1' 69.1(3) . . ?
 C16' C15' C14' 109.1(5) . . ?
 C16' C15' C20' 126.2(7) . . ?
 C16' C15' Ir1' 72.2(3) . . ?
 C20' C15' Ir1' 125.6(4) . . ?
 C15' C16' C17' 107.4(5) . . ?
 C15' C16' C21' 126.8(6) . . ?
 C15' C16' Ir1' 71.3(3) . . ?
 C17' C16' C21' 125.8(6) . . ?
 C17' C16' Ir1' 67.7(3) . . ?
 C21' C16' Ir1' 126.1(4) . . ?
 C16' C17' C22' 122.8(7) . . ?
 C16' C17' Ir1' 73.7(3) . . ?
 C18' C17' C16' 108.7(5) . . ?
 C18' C17' C22' 127.6(7) . . ?
 C18' C17' Ir1' 72.0(3) . . ?
 C22' C17' Ir1' 128.6(4) . . ?
 C14' C18' C23' 126.7(7) . . ?
 C14' C18' Ir1' 70.2(3) . . ?
 C17' C18' C14' 107.0(5) . . ?
 C17' C18' C23' 126.3(7) . . ?
 C17' C18' Ir1' 70.1(3) . . ?
 C23' C18' Ir1' 125.9(5) . . ?
 C2S C1S K1 138.4(7) . . ?
 C2SB C1S K1 121.0(9) . . ?
 C2SB C1S O1S 108.9(9) . . ?
 O1S C1S C2S 104.9(8) . . ?
 O1S C1S K1 43.2(3) . . ?
 C3S C2S C1S 99.0(9) . . ?
 C1S C2SB C3S 110.4(12) . . ?
 C2S C3S C4S 94.2(9) . . ?
 C2SB C3S C4S 102.4(9) . . ?
 O1S C4S C3S 104.1(6) . . ?
 O2S C5S C6S 108.3(6) . . ?
 C7S C6S C5S 105.6(7) . . ?
 C8S C7S C6S 104.2(7) . . ?
 O2S C8S C7S 108.5(7) . . ?
 P1 F1 K1 98.13(18) . . ?
 P1 F2 K1 97.90(16) . . ?
 P1 F5 K1 100.37(17) . . ?
 P2 F7 K1 104.26(17) . . ?
 P2 F8 K1 102.54(16) . . ?
 P2 F12 K1 90.81(15) . . ?
 P3 F13 K1 102.44(16) . . ?
 P3 F15 K1 95.34(16) . . ?
 P3 F17 K1 97.38(17) . . ?
 C1 Ir1 C14 99.15(19) . . ?
 C1 Ir1 C15 131.8(2) . . ?
 C1 Ir1 C16 161.6(2) . . ?
 C1 Ir1 C17 128.8(2) . . ?
 C1 Ir1 C18 98.0(2) . . ?
 C1 Ir1 Cl1 92.04(13) . . ?
 C1 Ir1 N1 84.78(18) . . ?
 C14 Ir1 C15 38.6(2) . . ?
 C14 Ir1 C16 64.4(2) . . ?
 C14 Ir1 C17 64.6(2) . . ?
 C14 Ir1 C18 38.9(2) . . ?
 C14 Ir1 Cl1 155.73(15) . . ?
 C15 Ir1 C16 38.0(2) . . ?
 C15 Ir1 C17 64.0(2) . . ?
 C15 Ir1 Cl1 136.11(16) . . ?
 C16 Ir1 C17 38.3(2) . . ?
 C16 Ir1 Cl1 100.43(15) . . ?
 C17 Ir1 Cl1 91.66(14) . . ?
 C18 Ir1 C15 64.5(2) . . ?
 C18 Ir1 C16 64.2(2) . . ?
 C18 Ir1 C17 38.2(2) . . ?
 C18 Ir1 Cl1 118.36(14) . . ?
 N1 Ir1 C14 116.24(18) . . ?
 N1 Ir1 C15 95.27(19) . . ?
 N1 Ir1 C16 109.31(18) . . ?
 N1 Ir1 C17 146.41(18) . . ?
 N1 Ir1 C18 155.17(17) . . ?
 N1 Ir1 Cl1 86.04(11) . . ?
 C1' Ir1' C14' 113.8(2) . . ?
 C1' Ir1' C15' 150.7(2) . . ?
 C1' Ir1' C16' 156.7(2) . . ?
 C1' Ir1' C17' 118.2(2) . . ?
 C1' Ir1' C18' 98.8(2) . . ?
 C1' Ir1' Cl1' 89.54(13) . . ?
 C1' Ir1' N1' 83.59(17) . . ?
 C14' Ir1' C15' 37.9(2) . . ?
 C14' Ir1' C16' 62.9(2) . . ?
 C14' Ir1' C18' 38.9(2) . . ?
 C14' Ir1' Cl1' 154.58(17) . . ?
 C15' Ir1' C16' 36.5(2) . . ?
 C15' Ir1' Cl1' 119.69(16) . . ?
 C16' Ir1' Cl1' 91.68(13) . . ?
 C17' Ir1' C14' 64.1(2) . . ?
 C17' Ir1' C15' 63.21(19) . . ?
 C17' Ir1' C16' 38.6(2) . . ?
 C17' Ir1' C18' 37.9(2) . . ?
 C17' Ir1' Cl1' 96.80(15) . . ?
 C18' Ir1' C15' 63.7(2) . . ?
 C18' Ir1' C16' 63.5(2) . . ?
 C18' Ir1' Cl1' 131.62(19) . . ?
 N1' Ir1' C14' 104.08(18) . . ?
 N1' Ir1' C15' 95.60(17) . . ?
 N1' Ir1' C16' 119.75(19) . . ?
 N1' Ir1' C17' 157.71(19) . . ?
 N1' Ir1' C18' 140.5(2) . . ?
 N1' Ir1' Cl1' 87.66(11) . . ?
 F1 K1 F12 103.29(11) . . ?
 F1 K1 F15 126.64(11) . . ?
 F1 K1 P1 27.46(8) . . ?
 F1 K1 P3 147.67(9) . . ?
 F2 K1 F1 47.00(11) . . ?
 F2 K1 F12 150.16(11) . . ?
 F2 K1 F15 126.90(13) . . ?
 F2 K1 P1 27.70(7) . . ?
 F2 K1 P3 121.18(10) . . ?
 F5 K1 F1 47.24(11) . . ?
 F5 K1 F2 47.46(10) . . ?
 F5 K1 F8 141.46(11) . . ?
 F5 K1 F12 118.40(11) . . ?
 F5 K1 F15 88.37(11) . . ?
 F5 K1 F17 83.25(11) . . ?
 F5 K1 P1 27.51(7) . . ?
 F5 K1 P3 101.19(9) . . ?
 F7 K1 F1 60.61(11) . . ?
 F7 K1 F2 105.95(12) . . ?
 F7 K1 F5 94.64(11) . . ?
 F7 K1 F8 47.77(9) . . ?
 F7 K1 F12 44.70(10) . . ?
 F7 K1 F15 105.37(12) . . ?
 F7 K1 F17 151.91(12) . . ?
 F7 K1 P1 87.08(8) . . ?
 F7 K1 P3 128.01(9) . . ?
 F8 K1 F1 97.84(11) . . ?
 F8 K1 F2 125.24(12) . . ?
 F8 K1 F12 44.40(9) . . ?
 F8 K1 F15 107.58(11) . . ?
 F8 K1 P1 124.31(8) . . ?
 F8 K1 P3 109.12(8) . . ?
 F12 K1 P1 126.17(8) . . ?
 F12 K1 P3 84.96(7) . . ?
 F13 K1 F1 174.55(12) . . ?
 F13 K1 F2 134.85(13) . . ?
 F13 K1 F5 128.84(12) . . ?
 F13 K1 F7 118.74(12) . . ?
 F13 K1 F8 84.56(11) . . ?
 F13 K1 F12 74.98(11) . . ?
 F13 K1 F15 47.92(11) . . ?
 F13 K1 F17 48.76(11) . . ?
 F13 K1 P1 150.99(10) . . ?
 F13 K1 P3 27.77(9) . . ?
 F15 K1 F12 69.32(11) . . ?
 F15 K1 P1 115.88(9) . . ?
 F15 K1 P3 27.92(7) . . ?
 F17 K1 F1 128.96(11) . . ?
 F17 K1 F2 93.24(11) . . ?
 F17 K1 F8 133.19(11) . . ?
 F17 K1 F12 112.45(10) . . ?
 F17 K1 F15 46.69(10) . . ?
 F17 K1 P1 102.24(8) . . ?
 F17 K1 P3 28.01(7) . . ?
 O1S K1 F1 110.57(13) . . ?
 O1S K1 F2 79.56(12) . . ?
 O1S K1 F5 124.65(13) . . ?
 O1S K1 F7 117.66(14) . . ?
 O1S K1 F8 77.80(13) . . ?
 O1S K1 F12 116.00(13) . . ?
 O1S K1 F13 74.69(13) . . ?
 O1S K1 F15 120.13(12) . . ?
 O1S K1 F17 85.43(13) . . ?
 O1S K1 P1 106.30(10) . . ?
 O1S K1 P3 92.72(11) . . ?
 P3 K1 P1 125.70(6) . . ?
 C5 N1 Ir1 123.3(3) . . ?
 C9 N1 C5 118.3(5) . . ?
 C9 N1 Ir1 118.4(4) . . ?
 C1 N2 C2 111.6(4) . . ?
 C1 N3 C3 111.2(4) . . ?
 C1 N3 C4 122.2(4) . . ?
 C3 N3 C4 126.5(4) . . ?
 C5' N1' C9' 118.6(4) . . ?
 C5' N1' Ir1' 123.6(3) . . ?
 C9' N1' Ir1' 117.7(3) . . ?
 C1' N2' C2' 111.5(4) . . ?
 C1' N3' C3' 111.2(4) . . ?
 C1' N3' C4' 122.1(4) . . ?
 C3' N3' C4' 126.6(4) . . ?
 C1S O1S K1 115.0(5) . . ?
 C4S O1S C1S 107.2(5) . . ?
 C4S O1S K1 123.0(4) . . ?
 C5S O2S C8S 106.9(6) . . ?
 F1 P1 F2 88.9(2) . . ?
 F1 P1 F5 88.2(2) . . ?
 F1 P1 K1 54.41(14) . . ?
 F2 P1 F5 88.23(19) . . ?
 F2 P1 K1 54.40(14) . . ?
 F3 P1 F1 89.6(2) . . ?
 F3 P1 F2 90.4(2) . . ?
 F3 P1 F4 90.9(2) . . ?
 F3 P1 F5 177.4(2) . . ?
 F3 P1 K1 125.38(18) . . ?
 F4 P1 F1 90.2(2) . . ?
 F4 P1 F2 178.4(2) . . ?
 F4 P1 F5 90.5(2) . . ?
 F4 P1 K1 124.05(15) . . ?
 F5 P1 K1 52.12(13) . . ?
 F6 P1 F1 178.9(2) . . ?
 F6 P1 F2 90.7(2) . . ?
 F6 P1 F3 91.4(2) . . ?
 F6 P1 F4 90.1(2) . . ?
 F6 P1 F5 90.7(2) . . ?
 F6 P1 K1 124.58(16) . . ?
 F7 P2 K1 49.35(14) . . ?
 F8 P2 F7 88.54(18) . . ?
 F8 P2 K1 50.95(13) . . ?
 F9 P2 F7 89.0(2) . . ?
 F9 P2 F8 90.17(19) . . ?
 F9 P2 F12 177.8(2) . . ?
 F9 P2 K1 115.91(15) . . ?
 F10 P2 F7 179.1(2) . . ?
 F10 P2 F8 90.57(19) . . ?
 F10 P2 F9 91.2(2) . . ?
 F10 P2 F11 90.8(2) . . ?
 F10 P2 F12 90.8(2) . . ?
 F10 P2 K1 129.84(15) . . ?
 F11 P2 F7 90.13(19) . . ?
 F11 P2 F8 178.7(2) . . ?
 F11 P2 F9 90.0(2) . . ?
 F11 P2 F12 90.8(2) . . ?
 F11 P2 K1 127.85(16) . . ?
 F12 P2 F7 89.0(2) . . ?
 F12 P2 F8 89.00(19) . . ?
 F12 P2 K1 62.09(14) . . ?
 F13 P3 K1 49.79(12) . . ?
 F14 P3 F13 89.6(2) . . ?
 F14 P3 F15 90.7(2) . . ?
 F14 P3 F16 90.8(2) . . ?
 F14 P3 F17 177.9(2) . . ?
 F14 P3 K1 123.44(16) . . ?
 F15 P3 F13 88.4(2) . . ?
 F15 P3 F17 88.55(19) . . ?
 F15 P3 K1 56.75(14) . . ?
 F16 P3 F13 89.4(2) . . ?
 F16 P3 F15 177.3(2) . . ?
 F16 P3 F17 89.8(2) . . ?
 F16 P3 K1 120.59(16) . . ?
 F17 P3 F13 88.4(2) . . ?
 F17 P3 K1 54.61(14) . . ?
 F18 P3 F13 179.3(2) . . ?
 F18 P3 F14 91.1(2) . . ?
 F18 P3 F15 91.7(2) . . ?
 F18 P3 F16 90.4(2) . . ?
 F18 P3 F17 90.9(2) . . ?
 F18 P3 K1 129.83(15) . . ?

loop_
  _refln_index_h
  _refln_index_k
  _refln_index_l
  _refln_F_squared_meas
  _refln_F_squared_sigma
 0 3 0 0.12 0.07
 0 4 0 704.47 52.24
 0 5 0 0.05 0.13
 0 5 0 0.26 0.11
 0 6 0 96.03 6.85
 0 6 0 87.3 5.95
 0 7 0 0.03 0.14
 0 7 0 0.16 0.12
 0 8 0 173.25 13.48
 0 8 0 188.91 11.69
 0 9 0 0.31 0.18
 0 9 0 0.12 0.14
 0 10 0 66.21 5.02
 0 10 0 66.97 4.39
 0 11 0 0.08 0.17
 0 11 0 -0.08 0.14
 0 12 0 144.01 9.08
 0 12 0 135.12 10.44
 0 13 0 0.19 0.19
 0 13 0 0.11 0.2
 0 -13 0 -0.1 0.45
 0 -14 0 47.55 6.45
 0 14 0 55.02 3.5
 0 15 0 -0.09 0.2
 0 -15 0 -0.11 0.46
 0 16 0 117.78 7.31
 0 16 0 108.88 6.27
 0 -16 0 102.96 13.13
 0 -16 0 112.76 7.11
 0 17 0 -0.07 0.24
 0 17 0 -0.12 0.17
 0 -17 0 -0.16 0.46
 0 18 0 10.44 0.75
 0 18 0 11.56 0.97
 0 -18 0 10.74 1.99
 0 -19 0 -0.43 0.41
 0 19 0 0.4 0.19
 0 20 0 60.7 3.42
 0 20 0 57.62 3.38
 0 -20 0 56.95 7.21
 0 -21 0 0.11 0.43
 0 21 0 0.12 0.18
 0 21 0 -0.37 0.17
 0 -22 0 20.87 2.89
 0 22 0 20.32 1.28
 0 22 0 21.35 1.29
 0 23 0 -0.07 0.16
 0 24 0 17.64 1.09
 1 3 0 0.06 0.07
 1 4 0 0.87 0.18
 1 5 0 0.01 0.1
 -1 5 0 0.07 0.09
 1 5 0 0.03 0.13
 -1 6 0 0.01 0.14
 1 6 0 0.06 0.11
 1 6 0 0.15 0.14
 -1 6 0 0.07 0.1
 1 7 0 -0.07 0.12
 -1 7 0 -0.03 0.1
 1 7 0 0.13 0.15
 -1 7 0 -0.03 0.14
 -1 8 0 0.4 0.17
 -1 8 0 0.04 0.12
 1 8 0 0.12 0.16
 1 8 0 0.04 0.13
 1 9 0 0.06 0.17
 -1 9 0 0.2 0.14
 -1 9 0 0.03 0.16
 1 9 0 0.18 0.15
 -1 10 0 0.12 0.15
 1 10 0 0.14 0.15
 1 10 0 -0.1 0.17
 -1 10 0 -0.07 0.18
 -1 11 0 0.02 0.18
 1 11 0 -0.04 0.18
 1 11 0 0.07 0.16
 -1 11 0 0.22 0.16
 1 12 0 0.15 0.18
 -1 12 0 -0.08 0.19
 1 12 0 0.03 0.19
 -1 12 0 -0.08 0.16
 -1 -12 0 -0.34 0.41
 1 -12 0 -0.09 0.55
 1 13 0 -0.13 0.2
 1 -13 0 0.27 0.51
 1 13 0 -0.24 0.16
 -1 -13 0 -0.08 0.46
 -1 13 0 0.08 0.2
 1 -14 0 -0.14 0.49
 -1 14 0 -0.11 0.2
 -1 -14 0 -0.32 0.45
 1 14 0 -0.11 0.22
 1 15 0 0.2 0.22
 -1 -15 0 0.15 0.49
 -1 15 0 -0.13 0.2
 1 15 0 -0.14 0.16
 1 -15 0 0.02 0.49
 1 16 0 0.11 0.24
 1 16 0 -0.11 0.16
 -1 -16 0 -0.32 0.46
 1 -16 0 -0.51 0.47
 -1 16 0 0.08 0.24
 1 -16 0 -0.03 0.25
 1 17 0 0.12 0.18
 -1 17 0 0.33 0.25
 1 17 0 0.27 0.26
 -1 -17 0 0.08 0.47
 1 -17 0 0.06 0.5
 -1 -18 0 -0.07 0.46
 1 18 0 0.14 0.18
 -1 18 0 0.28 0.29
 1 -18 0 -0.08 0.49
 1 18 0 0.37 0.19
 1 18 0 0.45 0.28
 1 19 0 -0.07 0.17
 -1 -19 0 0.18 0.46
 1 -19 0 0.1 0.52
 1 19 0 0.14 0.18
 -1 -20 0 0.07 0.43
 1 20 0 0.18 0.19
 1 -20 0 0.27 0.48
 1 20 0 0.04 0.18
 -1 -21 0 0.21 0.45
 1 21 0 -0.02 0.18
 1 21 0 0 0.19
 1 -21 0 0.06 0.41
 -1 21 0 0.13 0.18
 -1 22 0 -0.08 0.17
 1 22 0 -0.03 0.17
 1 -22 0 0.26 0.4
 -1 -22 0 -0.04 0.4
 1 22 0 0.36 0.18
 -1 23 0 -0.42 0.15
 1 23 0 0.23 0.16
 1 23 0 0 0.16
 1 24 0 -0.03 0.13
 2 0 0 100.67 6.03
 2 1 0 102.74 6.21
 -2 -1 0 104.62 6.21
 -2 -2 0 19.07 1.16
 2 2 0 19 1.44
 2 3 0 425.51 31.57
 2 4 0 131.42 9.51
 -2 4 0 123.96 9.49
 -2 5 0 3.86 0.35
 2 5 0 4.56 0.39
 2 5 0 3.45 0.36
 2 6 0 11.02 0.83
 2 6 0 9.75 0.75
 -2 6 0 9.58 0.8
 -2 6 0 9.85 0.75
 2 7 0 81.4 5.24
 2 7 0 85.51 6.03
 -2 7 0 75.72 5.23
 -2 7 0 78.93 6.01
 -2 8 0 158.48 11.58
 2 8 0 158.06 11.6
 2 8 0 156.81 10.06
 -2 8 0 148.27 10.05
 -2 9 0 42.59 3.24
 2 9 0 43.04 2.86
 2 9 0 43.2 3.26
 -2 9 0 42.23 2.85
 -2 10 0 1.14 0.25
 2 10 0 0.66 0.23
 -2 10 0 0.54 0.17
 2 10 0 0.52 0.19
 2 11 0 107.43 8.09
 -2 11 0 107.08 7.02
 2 11 0 110.15 7.04
 -2 11 0 106.02 8.07
 -2 -12 0 48 6.54
 2 12 0 56.23 4.12
 2 12 0 56.97 3.62
 2 -12 0 48.01 6.66
 -2 12 0 57.3 3.6
 2 -13 0 15.91 2.58
 2 13 0 17.98 1.26
 2 13 0 17.14 1.38
 -2 -13 0 13.7 2.42
 -2 13 0 16.61 1.23
 2 14 0 13.34 0.99
 -2 -14 0 9.22 1.99
 2 -14 0 10.23 2.06
 -2 14 0 13.34 0.98
 2 15 0 36.99 2.48
 2 -15 0 32.63 4.69
 2 15 0 34.97 2.09
 -2 -15 0 35.58 4.65
 -2 15 0 36.72 2.47
 2 16 0 93.68 6.19
 2 16 0 86.84 5.36
 2 -16 0 96.31 6.05
 -2 -16 0 89.31 11.17
 2 -16 0 91.15 11.24
 2 16 0 96.57 5.32
 -2 16 0 99.78 6.19
 -2 17 0 17.81 1.42
 -2 -17 0 18.66 2.79
 2 17 0 20.18 1.19
 2 17 0 20.52 1.19
 2 -17 0 16.03 2.81
 2 17 0 16.8 1.43
 2 18 0 36.29 2.15
 -2 -18 0 35.05 4.71
 -2 18 0 37 2.54
 2 18 0 38.34 2.55
 2 18 0 38.39 2.16
 2 -18 0 34.6 4.75
 2 -18 0 30.13 3.08
 2 -19 0 47.91 6.24
 2 19 0 50.13 2.88
 -2 -19 0 45.22 6.15
 2 19 0 52.34 2.91
 2 20 0 33.35 1.99
 2 20 0 35.88 2.01
 2 -20 0 28.88 4.33
 -2 -20 0 34.06 4.38
 2 21 0 0.62 0.21
 -2 -21 0 0.43 0.47
 2 -21 0 0.54 0.47
 2 21 0 0.44 0.2
 -2 -22 0 34.96 4.51
 2 22 0 34.6 2.1
 2 -22 0 34.78 4.48
 2 22 0 37.77 2.12
 -2 23 0 22.58 1.36
 2 23 0 24.02 1.36
 2 23 0 20.52 1.34
 2 24 0 3.95 0.36
 -3 0 0 0.07 0.04
 3 0 0 0.05 0.04
 3 -1 0 0.1 0.05
 3 1 0 0.13 0.05
 -3 -1 0 0.16 0.05
 3 2 0 0.21 0.08
 3 2 0 -0.04 0.06
 -3 -2 0 0.06 0.05
 -3 -3 0 0.12 0.06
 3 3 0 0.12 0.1
 3 4 0 0.19 0.12
 -3 -4 0 0.02 0.07
 3 4 0 0.16 0.11
 -3 4 0 0 0.08
 3 5 0 0.17 0.14
 3 5 0 -0.06 0.11
 -3 -5 0 0.01 0.07
 -3 5 0 0.13 0.09
 3 6 0 0.11 0.14
 -3 6 0 -0.07 0.09
 3 6 0 0.12 0.13
 3 7 0 -0.14 0.14
 -3 7 0 0.08 0.15
 3 7 0 0.04 0.14
 -3 7 0 0.06 0.1
 -3 8 0 0.04 0.12
 -3 8 0 0.11 0.16
 3 8 0 0.07 0.14
 3 8 0 -0.09 0.16
 -3 9 0 0.08 0.17
 3 9 0 0.09 0.19
 3 9 0 -0.07 0.15
 -3 9 0 0.07 0.12
 3 10 0 -0.08 0.18
 -3 10 0 0 0.18
 3 10 0 0.04 0.16
 -3 11 0 -0.03 0.18
 3 11 0 -0.07 0.16
 3 -11 0 -0.07 0.51
 3 11 0 0.17 0.21
 -3 12 0 -0.18 0.19
 3 12 0 -0.01 0.21
 3 12 0 -0.08 0.18
 3 -12 0 0.13 0.53
 -3 -13 0 0.3 0.44
 3 -13 0 -0.21 0.53
 3 13 0 0.13 0.22
 -3 13 0 0 0.22
 -3 -14 0 -0.06 0.41
 3 14 0 0.22 0.22
 3 -14 0 0.05 0.53
 -3 14 0 -0.14 0.2
 3 15 0 0.36 0.17
 3 15 0 -0.01 0.21
 -3 15 0 0.02 0.22
 3 -15 0 -0.47 0.47
 -3 -15 0 0.49 0.49
 3 15 0 -0.06 0.18
 -3 -16 0 -0.23 0.46
 3 16 0 0.11 0.19
 3 16 0 -0.03 0.24
 3 -16 0 0.11 0.47
 -3 16 0 -0.13 0.23
 3 -16 0 -0.08 0.51
 3 16 0 0.06 0.17
 3 -16 0 -0.03 0.27
 3 17 0 0.13 0.25
 3 -17 0 0 0.48
 3 17 0 0.24 0.19
 3 -17 0 -0.49 0.5
 -3 17 0 0.14 0.27
 -3 -17 0 -0.23 0.46
 3 17 0 0.15 0.19
 3 18 0 0.15 0.18
 3 -18 0 0.37 0.52
 3 18 0 0.48 0.27
 -3 -18 0 0.29 0.5
 3 -18 0 -0.19 0.5
 -3 18 0 0.26 0.29
 3 18 0 0.22 0.19
 3 19 0 0.19 0.18
 3 -19 0 -0.18 0.47
 3 19 0 0.36 0.2
 -3 -19 0 0.17 0.46
 -3 -20 0 0.18 0.49
 3 20 0 0.01 0.18
 3 -20 0 -0.07 0.46
 3 20 0 0.09 0.18
 3 21 0 -0.01 0.17
 -3 -21 0 0.36 0.45
 3 -21 0 0.2 0.44
 3 21 0 -0.32 0.16
 3 22 0 0.14 0.17
 3 22 0 0.01 0.16
 3 23 0 0.38 0.16
 3 23 0 0.22 0.15
 3 24 0 -0.15 0.12
 -4 0 0 0.29 0.07
 4 0 0 0.63 0.08
 -4 -1 0 61.76 3.68
 4 1 0 61.48 3.68
 4 -1 0 60.08 3.68
 4 -2 0 21.65 1.35
 4 2 0 21.89 1.35
 -4 -2 0 22.39 1.35
 -4 -3 0 8.18 0.53
 4 -4 0 11.17 0.95
 4 4 0 11.34 0.87
 4 4 0 11.55 0.77
 -4 -4 0 9.54 0.68
 -4 -5 0 81.01 5.05
 4 5 0 85.12 5.44
 -4 5 0 81.78 6.24
 4 5 0 87.28 6.28
 4 6 0 22.15 1.5
 -4 6 0 21.72 1.66
 -4 -6 0 20.29 1.36
 4 6 0 23.03 1.7
 4 7 0 71.15 4.69
 -4 7 0 73.35 5.36
 4 7 0 77.24 5.4
 -4 -7 0 64.61 4.34
 -4 8 0 4.74 0.48
 -4 -8 0 4.73 0.39
 -4 8 0 5.01 0.46
 4 8 0 5.59 0.51
 4 8 0 5.62 0.52
 -4 9 0 7.69 0.68
 4 9 0 8.67 0.73
 4 9 0 8.74 0.75
 -4 10 0 7.65 0.65
 4 10 0 7.88 0.68
 4 10 0 6.98 0.69
 -4 11 0 169.54 10.8
 4 -11 0 144.4 19.39
 4 11 0 175.65 12.48
 4 11 0 173.68 10.83
 4 -12 0 0.58 0.59
 4 12 0 1.06 0.28
 -4 12 0 0.9 0.26
 4 -13 0 13.1 2.44
 4 13 0 14.88 1.15
 -4 13 0 15.37 1.13
 4 14 0 1.99 0.39
 4 14 0 1.49 0.24
 -4 -14 0 1.44 0.62
 4 -14 0 0.74 0.68
 -4 14 0 2.27 0.39
 -4 -15 0 115.12 14.36
 4 -15 0 119.65 9.5
 4 -15 0 133.66 7.87
 4 15 0 125.2 6.92
 4 15 0 125.22 8.05
 4 15 0 115.59 6.99
 -4 15 0 124.11 8.01
 4 -15 0 119.09 14.55
 4 16 0 0.49 0.28
 4 -16 0 0.19 0.29
 -4 -16 0 0.17 0.49
 4 -16 0 0.08 0.58
 4 16 0 0.4 0.19
 -4 16 0 0.37 0.27
 4 -16 0 -0.02 0.49
 4 16 0 0.05 0.18
 4 17 0 5.81 0.67
 -4 -17 0 5.1 1.45
 4 -17 0 5.88 1.63
 4 -17 0 4.65 0.96
 -4 17 0 5.31 0.64
 4 17 0 6.85 0.52
 4 17 0 6.38 0.51
 4 18 0 4.97 0.45
 4 18 0 5.05 0.46
 4 -18 0 3.85 0.85
 4 -18 0 2.99 1
 4 18 0 5.39 0.61
 -4 -18 0 4.81 1.39
 4 19 0 84.87 4.75
 4 19 0 81.97 4.71
 4 -19 0 80.71 9.97
 -4 -19 0 80.19 9.89
 -4 -20 0 3.96 1.27
 4 -20 0 4.45 1.41
 4 20 0 4.77 0.45
 4 20 0 5.1 0.46
 -4 -21 0 0.55 0.44
 4 -21 0 0.21 0.44
 4 21 0 0.61 0.2
 4 21 0 0.57 0.2
 4 22 0 11.39 0.72
 4 22 0 9.47 0.71
 4 23 0 43.05 2.32
 4 23 0 36.02 2.29
 4 24 0 0.79 0.15
 -5 0 0 0.11 0.08
 5 0 0 0.04 0.07
 -5 -1 0 0.05 0.07
 5 -1 0 0.06 0.07
 5 1 0 -0.15 0.06
 5 -1 0 0.02 0.08
 -5 -2 0 0.14 0.07
 5 2 0 0.14 0.08
 5 -2 0 0.09 0.08
 5 3 0 0 0.1
 -5 -3 0 -0.06 0.06
 5 -3 0 0.03 0.16
 5 3 0 -0.05 0.08
 5 4 0 0.19 0.12
 5 -4 0 -0.01 0.17
 -5 -4 0 0.07 0.07
 5 5 0 -0.02 0.13
 5 -5 0 0 0.21
 -5 -5 0 0 0.07
 5 6 0 0.19 0.15
 -5 -6 0 -0.08 0.07
 -5 6 0 0.07 0.09
 5 6 0 0.29 0.15
 5 -6 0 0.11 0.25
 5 7 0 -0.07 0.16
 -5 7 0 -0.04 0.1
 5 7 0 -0.04 0.15
 5 -7 0 -0.03 0.29
 -5 -7 0 -0.03 0.08
 5 8 0 0.1 0.17
 5 8 0 0.05 0.2
 -5 9 0 0.17 0.19
 5 9 0 0.05 0.2
 5 9 0 -0.06 0.15
 5 10 0 0.11 0.22
 -5 10 0 0.01 0.18
 5 11 0 -0.08 0.21
 -5 11 0 0.05 0.2
 5 -11 0 0.06 0.53
 -5 12 0 0.31 0.22
 5 -12 0 0.47 0.47
 5 12 0 -0.01 0.22
 5 -12 0 -0.38 0.52
 5 -13 0 0.31 0.6
 -5 13 0 0.18 0.22
 5 13 0 -0.02 0.24
 5 -13 0 -0.78 0.39
 5 14 0 0.16 0.17
 -5 -14 0 0.1 0.42
 5 -14 0 0.09 0.49
 5 14 0 0.15 0.26
 5 -14 0 -0.15 0.55
 -5 14 0 -0.04 0.22
 5 15 0 0.1 0.23
 5 -15 0 0.54 0.64
 5 -15 0 0.07 0.48
 -5 15 0 -0.17 0.23
 5 15 0 0.12 0.19
 5 15 0 0.13 0.18
 5 -15 0 -0.22 0.25
 -5 -15 0 -0.04 0.47
 5 15 0 0.25 0.18
 -5 -16 0 0.08 0.49
 5 16 0 0.09 0.18
 5 -16 0 -0.04 0.58
 5 16 0 0.31 0.19
 5 -16 0 -0.15 0.46
 -5 16 0 -0.34 0.24
 5 16 0 0.45 0.27
 5 17 0 -0.32 0.25
 5 17 0 0.22 0.18
 5 17 0 0.25 0.19
 5 -17 0 -0.39 0.48
 -5 -17 0 0.31 0.5
 5 -17 0 -0.58 0.54
 5 -18 0 0.08 0.55
 5 18 0 0.09 0.18
 5 18 0 0.25 0.18
 -5 -18 0 -0.08 0.49
 -5 -19 0 0.31 0.5
 5 19 0 0.39 0.19
 5 -19 0 -0.09 0.5
 5 19 0 0.26 0.19
 5 -20 0 -0.36 0.44
 5 20 0 0.1 0.18
 5 20 0 0.24 0.19
 -5 -20 0 0.2 0.46
 5 -21 0 0.22 0.41
 5 21 0 0.15 0.17
 -5 -21 0 -0.08 0.42
 5 21 0 -0.04 0.17
 5 22 0 -0.13 0.14
 5 22 0 -0.01 0.15
 5 23 0 0.01 0.13
 5 23 0 0.12 0.14
 6 0 0 6.47 0.48
 6 0 0 7.93 0.49
 -6 0 0 7.96 0.5
 6 1 0 74.1 4.46
 6 -1 0 72.44 4.46
 -6 -1 0 76.1 4.46
 6 -1 0 65.66 4.64
 6 -1 0 81.6 5.56
 6 2 0 75.72 4.67
 6 -2 0 73.6 5.44
 -6 -2 0 71.13 4.36
 6 -2 0 70.18 4.36
 6 2 0 70.06 4.36
 6 3 0 112.6 6.71
 -6 -3 0 108.78 6.71
 6 -3 0 110.09 6.72
 6 -3 0 108.06 8.38
 6 3 0 117.89 7.2
 6 -4 0 38.72 2.45
 6 -4 0 40.53 3.09
 6 4 0 42.6 2.64
 -6 -4 0 38.19 2.44
 6 5 0 29.16 1.87
 -6 -5 0 25.97 1.71
 6 -5 0 28.18 2.21
 -6 -6 0 2.21 0.23
 6 6 0 2.33 0.33
 6 -6 0 2.98 0.53
 6 7 0 172.12 10.44
 6 -7 0 149.46 12.16
 6 -8 0 38.55 3.1
 6 8 0 37.32 2.57
 6 9 0 24.84 1.83
 -6 9 0 25.58 1.79
 6 -9 0 28.04 2.28
 6 -10 0 11.34 2.06
 6 10 0 12.1 0.98
 6 -10 0 13.15 1.33
 -6 10 0 11.59 0.93
 6 -11 0 119.84 9.1
 6 11 0 122.57 7.72
 6 -11 0 99.63 13.86
 -6 11 0 125.49 7.68
 6 12 0 9.85 0.85
 6 -12 0 6.9 1.87
 6 -12 0 10.26 1.21
 -6 12 0 9.75 0.81
 6 -13 0 16.92 3.06
 -6 13 0 21.1 1.48
 6 -13 0 18.73 1.92
 6 13 0 21.23 1.52
 6 -14 0 36.42 4.98
 6 -14 0 42.54 3.22
 -6 14 0 36.23 2.51
 6 14 0 34.99 2.15
 6 14 0 34.95 2.15
 6 14 0 32.54 2.39
 -6 -14 0 35.09 2.17
 6 14 0 39.24 2.58
 6 -14 0 38.94 2.51
 6 -15 0 118.25 14.05
 6 -15 0 108.46 9.08
 6 15 0 111.85 6.67
 -6 -15 0 112.91 13.74
 -6 15 0 118.77 7.65
 6 15 0 112.83 7.41
 6 15 0 117.57 7.7
 6 -15 0 129.09 7.53
 6 15 0 119.07 6.61
 6 16 0 9.57 0.66
 6 -16 0 10.01 1.19
 -6 -16 0 8.47 1.79
 6 -16 0 8.96 2.12
 6 16 0 7.77 0.72
 6 16 0 10.09 0.67
 6 16 0 7.51 0.83
 6 17 0 -0.07 0.24
 6 17 0 0.18 0.19
 -6 -17 0 0.53 0.53
 6 -17 0 0.01 0.58
 6 17 0 0.11 0.22
 6 17 0 0.42 0.21
 6 -17 0 0.14 0.48
 -6 -18 0 9.17 1.72
 6 18 0 6.48 0.55
 6 18 0 6.36 0.56
 6 -18 0 6.74 1.72
 6 19 0 75.7 4.14
 6 19 0 68.51 4.1
 6 -19 0 67.53 8.71
 -6 -19 0 72.26 8.68
 -6 -20 0 1.75 0.66
 6 -20 0 1.83 0.67
 6 21 0 0.67 0.19
 6 21 0 0.32 0.18
 -6 -21 0 0.15 0.47
 6 -21 0 0.51 0.46
 6 22 0 0.39 0.17
 6 22 0 0.33 0.16
 6 23 0 31.74 1.77
 6 23 0 28.19 1.76
 7 0 0 0.01 0.07
 7 0 0 0.16 0.09
 7 1 0 0.04 0.09
 -7 -1 0 -0.01 0.08
 7 -1 0 -0.03 0.08
 7 -1 0 -0.09 0.13
 7 -1 0 0.07 0.09
 -7 -2 0 0.04 0.08
 7 2 0 0.07 0.09
 7 -2 0 0.17 0.15
 7 -2 0 0.15 0.1
 7 2 0 -0.05 0.09
 7 -2 0 0.18 0.1
 -7 -3 0 0.06 0.08
 7 3 0 0.09 0.1
 7 -3 0 0.06 0.16
 7 3 0 0.07 0.1
 7 -4 0 0.08 0.1
 -7 -4 0 0.05 0.08
 7 4 0 0.28 0.11
 7 4 0 0.21 0.13
 7 -4 0 0.15 0.19
 7 -5 0 0.16 0.11
 7 -5 0 0.08 0.22
 7 5 0 0.1 0.14
 7 6 0 -0.21 0.15
 7 -6 0 0.08 0.27
 7 7 0 0.15 0.18
 7 -7 0 -0.02 0.27
 7 -8 0 0.09 0.31
 7 8 0 0.06 0.2
 7 9 0 0.23 0.23
 7 -9 0 0.72 0.43
 7 10 0 -0.05 0.23
 7 -10 0 -0.04 0.52
 -7 10 0 0.19 0.22
 7 -10 0 -0.18 0.41
 7 11 0 0.04 0.25
 -7 11 0 0 0.21
 7 -11 0 0.2 0.48
 7 -11 0 0.42 0.6
 7 -12 0 0.03 0.58
 -7 12 0 -0.22 0.21
 7 -12 0 0.36 0.5
 7 12 0 0.15 0.26
 7 -13 0 -0.12 0.23
 7 -13 0 -0.33 0.5
 7 -13 0 0.11 0.63
 7 13 0 0.03 0.17
 -7 13 0 0.02 0.22
 7 13 0 0.12 0.29
 7 -14 0 -0.1 0.22
 7 -14 0 -0.2 0.6
 7 14 0 0.33 0.3
 7 -14 0 0.54 0.54
 -7 -14 0 -0.25 0.25
 7 14 0 0.1 0.19
 7 14 0 -0.15 0.18
 -7 14 0 0.1 0.24
 7 14 0 -0.1 0.16
 7 -15 0 -0.37 0.6
 7 15 0 0.02 0.26
 7 15 0 0.14 0.19
 7 15 0 -0.06 0.19
 7 -15 0 -0.29 0.26
 7 -15 0 0.77 0.51
 -7 -15 0 -0.38 0.26
 7 15 0 -0.14 0.17
 -7 -16 0 -0.1 0.46
 7 16 0 0.06 0.29
 7 -16 0 -0.36 0.58
 7 16 0 -0.09 0.17
 7 16 0 -0.27 0.19
 7 -16 0 -0.15 0.48
 7 16 0 0.08 0.18
 -7 -17 0 -0.16 0.48
 7 -17 0 0.06 0.6
 7 17 0 0.19 0.19
 7 17 0 -0.12 0.21
 7 17 0 0.16 0.29
 7 -17 0 -0.61 0.51
 7 17 0 -0.12 0.18
 -7 -18 0 0.12 0.51
 7 18 0 0.03 0.19
 7 18 0 0.2 0.23
 7 18 0 -0.19 0.17
 7 -18 0 -0.45 0.53
 -7 -19 0 -0.05 0.49
 7 -19 0 -0.24 0.48
 7 19 0 0.17 0.18
 7 19 0 0.23 0.2
 7 -20 0 -0.07 0.46
 -7 -20 0 0.61 0.51
 7 20 0 0.17 0.18
 7 20 0 -0.3 0.16
 7 21 0 0.09 0.17
 7 21 0 -0.12 0.14
 -7 -21 0 -0.16 0.41
 7 -21 0 0.04 0.4
 7 22 0 0.1 0.16
 7 22 0 0.11 0.14
 7 23 0 0.05 0.13
 7 23 0 -0.11 0.12
 8 0 0 63.61 3.86
 8 -1 0 18.93 1.31
 8 -1 0 16 1.03
 8 1 0 16.11 1.03
 8 -1 0 14.25 1.05
 8 -2 0 0.33 0.12
 8 -2 0 0.5 0.13
 8 -2 0 0.38 0.18
 8 2 0 0.55 0.13
 8 -3 0 30.62 1.95
 8 3 0 32.02 1.94
 8 3 0 33.95 2.08
 8 -3 0 32.57 2.45
 8 -3 0 27.64 2.02
 8 -4 0 145.5 9.72
 8 4 0 161.73 9.99
 8 -4 0 167.65 11.64
 8 -4 0 148.06 9.33
 8 4 0 151.43 9.32
 8 -5 0 31.21 2.45
 8 5 0 30.08 2.06
 8 6 0 3.47 0.41
 8 -6 0 3.19 0.57
 8 -7 0 35.57 2.96
 8 7 0 37.11 2.48
 8 -8 0 100.32 7.49
 8 8 0 93.78 6.36
 8 9 0 8.37 0.76
 8 -9 0 7.7 1.04
 8 -9 0 10.52 1.77
 8 -10 0 22.24 2.14
 8 -10 0 26.61 3.44
 8 10 0 24.28 1.74
 -8 10 0 22.74 1.68
 8 11 0 13.32 1.11
 8 -11 0 13.2 1.47
 -8 11 0 13.24 1.05
 8 -11 0 13.61 2.42
 8 12 0 48.79 3.5
 8 -12 0 55.31 3.41
 8 -12 0 54.75 4.26
 -8 12 0 51 3.45
 8 -12 0 44.15 6.51
 8 13 0 2.91 0.5
 8 -13 0 2.58 0.44
 -8 -13 0 2.22 0.33
 8 -13 0 0.35 0.67
 8 13 0 1.73 0.3
 8 -13 0 2.11 0.71
 8 13 0 1.65 0.26
 -8 13 0 1.72 0.35
 8 13 0 1.58 0.25
 -8 -14 0 17.02 1.24
 8 -14 0 25.22 1.57
 8 14 0 18.51 1.42
 8 -14 0 22.63 2.09
 8 14 0 21.39 1.59
 8 -14 0 20.29 3.33
 8 14 0 18.36 1.26
 -8 -14 0 22.28 1.34
 8 14 0 21.82 1.28
 8 15 0 11.04 0.93
 8 15 0 13.25 0.85
 8 -15 0 12.09 1.49
 8 15 0 13.02 1.08
 8 15 0 11.41 0.83
 -8 -15 0 12.24 0.9
 8 -15 0 13.17 2.55
 8 16 0 8.25 0.69
 -8 -16 0 6.66 0.66
 8 16 0 7.06 0.77
 8 -16 0 6.32 1.13
 8 16 0 9.46 0.63
 -8 -16 0 7.2 1.69
 8 16 0 7.64 0.6
 8 -16 0 5.9 1.97
 8 17 0 1.82 0.27
 8 17 0 2.4 0.35
 8 17 0 2.4 0.33
 8 -17 0 0.74 0.7
 -8 -17 0 0.92 0.63
 8 18 0 5.41 0.55
 8 18 0 5.96 0.5
 8 -18 0 3.39 1.11
 -8 -18 0 7.31 1.67
 8 18 0 5.75 0.49
 8 19 0 10.99 0.87
 8 19 0 11.54 0.76
 8 -19 0 6.75 1.95
 8 19 0 11.64 0.78
 -8 -19 0 11.34 2.05
 8 -20 0 8.11 1.86
 8 20 0 10.64 0.74
 8 20 0 11.25 0.73
 -8 -20 0 10.77 1.88
 8 -21 0 1.75 0.59
 8 21 0 1.82 0.29
 8 21 0 2.79 0.3
 8 22 0 9.34 0.61
 8 22 0 8.75 0.62
 9 0 0 0.26 0.12
 9 -1 0 0.07 0.1
 9 1 0 -0.17 0.1
 9 2 0 -0.05 0.11
 9 -2 0 -0.13 0.15
 9 -2 0 -0.14 0.1
 9 -3 0 0.06 0.19
 9 -3 0 -0.04 0.12
 9 3 0 0.02 0.11
 9 -4 0 -0.03 0.13
 9 -4 0 -0.12 0.2
 9 4 0 0.06 0.13
 9 -5 0 0.28 0.23
 9 -5 0 0.23 0.17
 9 5 0 -0.01 0.13
 9 6 0 0.09 0.16
 9 -6 0 -0.46 0.17
 9 -6 0 -0.01 0.26
 9 -7 0 0.27 0.2
 9 -7 0 0.35 0.34
 9 7 0 -0.1 0.19
 9 -8 0 0.16 0.37
 9 8 0 0.47 0.24
 9 -8 0 0.34 0.21
 9 -8 0 0.02 0.35
 9 9 0 0.11 0.24
 9 -9 0 -0.13 0.4
 9 -9 0 0.02 0.2
 9 -9 0 -0.16 0.41
 9 10 0 0.18 0.26
 9 -10 0 -0.21 0.47
 9 -10 0 0.26 0.47
 9 -10 0 0.04 0.23
 -9 10 0 0 0.26
 9 -11 0 -0.15 0.47
 9 -11 0 0.08 0.63
 9 -11 0 0.24 0.54
 9 -11 0 0.1 0.22
 -9 11 0 -0.15 0.23
 9 11 0 0.35 0.3
 9 -12 0 -0.02 0.54
 -9 -12 0 0.02 0.24
 9 12 0 -0.16 0.18
 9 -12 0 -0.03 0.25
 9 -12 0 0.05 0.58
 9 12 0 0.06 0.28
 -9 12 0 -0.04 0.27
 9 -13 0 -0.48 0.51
 -9 -13 0 0.15 0.27
 9 -13 0 0.22 0.27
 9 13 0 -0.15 0.3
 9 13 0 0.13 0.19
 9 -13 0 -0.35 0.56
 9 13 0 -0.02 0.18
 -9 -13 0 0.11 0.23
 9 13 0 -0.06 0.2
 -9 -14 0 -0.64 0.25
 9 14 0 -0.07 0.19
 9 -14 0 -0.63 0.6
 -9 -14 0 -0.38 0.26
 9 -14 0 0.02 0.62
 9 14 0 -0.17 0.18
 9 14 0 -0.11 0.2
 9 14 0 0.17 0.32
 9 -14 0 -0.6 0.27
 9 -15 0 0.56 0.63
 -9 -15 0 0.08 0.27
 9 15 0 0.24 0.32
 9 15 0 0.07 0.22
 9 15 0 -0.1 0.19
 9 -15 0 -0.51 0.6
 9 15 0 0.08 0.22
 9 -16 0 -0.62 0.58
 9 -16 0 -0.33 0.51
 9 16 0 -0.02 0.22
 9 16 0 0.18 0.21
 -9 -16 0 -0.31 0.29
 9 16 0 -0.04 0.3
 9 16 0 0.09 0.2
 -9 -17 0 -0.07 0.51
 9 17 0 0.42 0.21
 9 17 0 -0.07 0.21
 9 17 0 0.13 0.2
 9 -17 0 -0.49 0.61
 -9 -17 0 0.67 0.3
 9 -18 0 -0.57 0.57
 9 18 0 -0.21 0.18
 -9 -18 0 0.05 0.55
 9 18 0 -0.06 0.19
 9 18 0 0.15 0.22
 9 19 0 -0.17 0.22
 9 19 0 0.17 0.18
 9 -19 0 -0.59 0.49
 -9 -19 0 -0.25 0.47
 9 19 0 0.11 0.17
 9 -20 0 0.21 0.47
 9 20 0 -0.02 0.22
 9 20 0 0.05 0.17
 -9 -20 0 0.28 0.49
 9 20 0 -0.15 0.16
 9 21 0 -0.18 0.13
 9 21 0 0.22 0.15
 9 22 0 -0.15 0.12
 9 22 0 -0.04 0.13
 10 -2 0 0.7 0.23
 10 -3 0 3.95 0.44
 10 -3 0 2.69 0.31
 10 -4 0 78.84 5.31
 10 -4 0 89.34 6.39
 10 -5 0 8.34 0.84
 10 -5 0 8.22 0.64
 10 5 0 7.66 0.65
 10 -6 0 1.54 0.38
 10 6 0 1.57 0.28
 10 -6 0 1.1 0.26
 10 -7 0 0.43 0.23
 10 -7 0 0.45 0.33
 10 -7 0 0.69 0.37
 10 7 0 0.49 0.23
 10 -8 0 137.71 15.63
 10 8 0 137.07 8.79
 10 -8 0 133.56 10.29
 10 -8 0 129.54 8.53
 10 -9 0 1.15 0.29
 10 -9 0 0.42 0.45
 10 -9 0 0.74 0.49
 10 9 0 0.86 0.32
 10 -10 0 1.29 0.67
 10 -10 0 1.13 0.31
 10 10 0 1.35 0.38
 10 -10 0 0.74 0.59
 10 -10 0 1.15 0.6
 10 -11 0 0.72 0.69
 -10 -11 0 1.03 0.28
 10 -11 0 1.08 0.68
 10 11 0 1.22 0.39
 10 -11 0 0.93 0.3
 10 -11 0 0.76 0.61
 -10 -12 0 54.47 3.33
 10 12 0 55.68 3.74
 10 -12 0 56.81 4.81
 10 12 0 57.78 3.32
 -10 -12 0 63.45 3.38
 10 -12 0 67.48 3.86
 10 -12 0 50.19 7.25
 10 12 0 58.87 3.97
 10 12 0 53.08 3.34
 10 -13 0 -0.33 0.59
 -10 -13 0 0.61 0.28
 10 13 0 0.65 0.22
 10 -13 0 0.41 0.3
 10 13 0 0.56 0.2
 10 -13 0 -0.07 0.63
 10 13 0 0.43 0.35
 10 13 0 0.31 0.23
 -10 -13 0 0.33 0.24
 10 14 0 13.85 1.06
 -10 -14 0 14.82 1.01
 10 -14 0 13.51 1.67
 10 14 0 14.47 0.94
 10 14 0 15.1 1.24
 -10 -14 0 12.63 0.92
 10 -14 0 11.59 2.67
 10 14 0 13.59 0.92
 10 -15 0 -0.16 0.69
 10 15 0 1.12 0.24
 -10 -15 0 0.71 0.31
 10 15 0 -0.06 0.33
 10 15 0 0.69 0.22
 10 15 0 0.6 0.26
 -10 -15 0 0.24 0.26
 10 -15 0 1.34 0.74
 10 16 0 4.41 0.45
 -10 -16 0 2.91 0.45
 10 16 0 4.73 0.52
 10 16 0 3.11 0.6
 10 16 0 4.69 0.44
 10 -16 0 4.64 1.02
 10 -17 0 -0.31 0.65
 10 17 0 0.51 0.22
 -10 -17 0 -0.05 0.29
 10 17 0 0.47 0.21
 10 17 0 -0.03 0.23
 -10 -17 0 0.15 0.56
 10 -18 0 10.91 2.45
 10 18 0 14.41 1.06
 10 18 0 14.16 0.93
 10 18 0 13.57 0.92
 -10 -18 0 15.55 2.41
 10 19 0 -0.08 0.16
 10 19 0 -0.1 0.16
 -10 -19 0 0.13 0.5
 10 19 0 0.07 0.23
 10 -19 0 -0.12 0.56
 10 20 0 10.34 0.66
 10 -20 0 7.83 1.77
 10 20 0 9.12 0.67
 10 20 0 10.17 0.79
 -10 -20 0 9.87 1.83
 10 21 0 1.97 0.28
 10 21 0 2.36 0.37
 10 22 0 11.81 0.75
 11 -3 0 -0.13 0.19
 11 -4 0 0.27 0.23
 11 -5 0 -0.32 0.15
 11 -5 0 0.07 0.25
 11 6 0 -0.21 0.16
 11 -6 0 -0.15 0.18
 11 6 0 0.14 0.21
 11 -6 0 0.17 0.3
 11 -7 0 0.16 0.34
 11 -7 0 -0.01 0.2
 11 7 0 0.11 0.23
 11 7 0 0.36 0.21
 11 -7 0 -0.05 0.28
 11 -8 0 -0.02 0.22
 11 -8 0 0.01 0.33
 11 8 0 -0.03 0.24
 11 -8 0 0.6 0.4
 11 -9 0 -0.18 0.39
 11 -9 0 0.55 0.53
 11 -9 0 0.02 0.43
 11 9 0 0.23 0.28
 11 -9 0 0.12 0.23
 11 10 0 0.07 0.31
 11 -10 0 -0.55 0.58
 11 -10 0 0.35 0.53
 11 -10 0 -0.1 0.25
 11 -10 0 -0.38 0.47
 11 -11 0 -0.3 0.26
 -11 -11 0 -0.19 0.21
 11 -11 0 -0.35 0.54
 11 11 0 -0.13 0.2
 11 -11 0 -0.38 0.49
 11 -11 0 -0.45 0.63
 -11 -11 0 -0.02 0.24
 11 11 0 -0.06 0.2
 11 11 0 0.28 0.34
 11 12 0 0.63 0.23
 11 12 0 0 0.2
 11 12 0 0.33 0.36
 11 12 0 0.34 0.23
 11 -12 0 -0.18 0.27
 -11 -12 0 -0.37 0.24
 11 -12 0 0.11 0.62
 11 -12 0 -0.27 0.57
 -11 -12 0 -0.09 0.25
 11 -13 0 0.52 0.68
 -11 -13 0 -0.06 0.27
 11 -13 0 -0.57 0.63
 11 13 0 -0.04 0.37
 11 13 0 0.05 0.22
 11 13 0 0.07 0.22
 11 13 0 -0.1 0.2
 11 -13 0 0.33 0.3
 -11 -13 0 -0.06 0.26
 11 14 0 -0.04 0.22
 -11 -14 0 -0.41 0.26
 11 -14 0 1.06 0.79
 -11 -14 0 0.06 0.29
 11 14 0 0.31 0.22
 11 14 0 -0.13 0.32
 11 -14 0 -0.03 0.68
 11 14 0 0.46 0.24
 11 -15 0 -0.69 0.64
 11 15 0 -0.1 0.22
 11 15 0 0.28 0.35
 11 15 0 -0.05 0.23
 11 -15 0 0.02 0.65
 -11 -15 0 -0.06 0.27
 -11 -15 0 -0.18 0.26
 11 15 0 -0.43 0.19
 11 16 0 0.39 0.26
 11 16 0 -0.04 0.22
 11 -16 0 -1.2 0.62
 -11 -16 0 -0.52 0.27
 11 16 0 0.14 0.2
 -11 -17 0 0.12 0.55
 11 -17 0 -1.48 0.64
 11 17 0 0.29 0.22
 11 17 0 0.17 0.24
 -11 -17 0 0.11 0.29
 11 17 0 -0.09 0.18
 11 18 0 -0.02 0.19
 -11 -18 0 -0.67 0.26
 -11 -18 0 0.15 0.52
 11 18 0 -0.06 0.23
 11 -18 0 -0.56 0.56
 11 18 0 -0.05 0.18
 -11 -19 0 0.04 0.5
 11 19 0 0.01 0.16
 11 19 0 -0.18 0.17
 11 19 0 -0.17 0.22
 11 -19 0 -0.21 0.51
 11 20 0 0.04 0.16
 11 20 0 -0.2 0.21
 11 21 0 -0.06 0.13
 11 21 0 -0.22 0.18
 12 0 0 0.98 0.21
 12 1 0 7.15 0.6
 12 -2 0 0.39 0.35
 12 2 0 0.47 0.19
 12 3 0 2.39 0.33
 12 4 0 35.72 2.83
 12 -4 0 46.13 4.95
 12 -4 0 43.7 3.26
 12 5 0 6.91 0.68
 12 -5 0 9.19 0.86
 12 -5 0 10.1 1.36
 12 -6 0 0.5 0.35
 12 6 0 0.61 0.23
 12 -6 0 0.73 0.32
 12 -7 0 16.5 1.23
 12 -7 0 17.38 1.58
 12 7 0 18.23 1.29
 12 7 0 15.98 1.25
 12 -7 0 16.84 2.39
 12 -8 0 21.19 1.95
 12 -8 0 18.17 1.76
 12 8 0 22.71 1.59
 12 -8 0 21.73 1.52
 12 -8 0 21.48 2.95
 12 9 0 7.39 0.78
 12 -9 0 5 1.69
 12 -9 0 5.71 1.05
 12 -9 0 8.75 1.1
 12 -9 0 8.45 0.72
 12 -10 0 6.56 0.63
 -12 -10 0 5.39 0.53
 12 -10 0 5.24 1.02
 12 -10 0 3.82 1.06
 12 10 0 6.59 0.73
 12 10 0 4.86 0.57
 12 -10 0 5.43 0.86
 12 -11 0 15.33 2.76
 12 -11 0 15.34 1.7
 12 -11 0 13.76 1.73
 12 -11 0 18.27 1.26
 -12 -11 0 17.82 1.1
 12 11 0 16.16 1.34
 12 11 0 14.34 1.16
 12 11 0 14.68 1.01
 -12 -11 0 14.45 1.02
 12 -12 0 8.04 0.79
 12 -12 0 5.62 1.21
 12 12 0 7.77 0.61
 12 12 0 7.34 0.7
 12 12 0 6.74 0.85
 -12 -12 0 7.02 0.6
 -12 -12 0 7.89 0.67
 12 13 0 -0.01 0.21
 -12 -13 0 0.26 0.26
 -12 -13 0 0.24 0.28
 12 -13 0 0.18 0.74
 12 13 0 0.18 0.37
 12 -13 0 -0.98 0.6
 12 13 0 -0.01 0.24
 -12 -14 0 4.27 0.53
 12 14 0 4.16 0.45
 12 -14 0 1.15 1
 12 14 0 3.81 0.67
 12 -14 0 3.71 1.02
 -12 -14 0 4.26 0.5
 12 14 0 4.21 0.53
 12 15 0 0.35 0.22
 12 15 0 0.38 0.27
 -12 -15 0 -0.08 0.27
 -12 -15 0 1.34 0.33
 12 -15 0 -0.56 0.7
 12 -16 0 0.02 0.8
 -12 -16 0 1.06 0.34
 12 16 0 1.63 0.28
 12 16 0 1.68 0.33
 -12 -17 0 -0.25 0.27
 12 17 0 0.26 0.25
 -12 -17 0 0.46 0.58
 12 17 0 0.31 0.19
 -12 -18 0 5.94 0.6
 -12 -18 0 7.12 1.64
 12 18 0 7.08 0.65
 12 18 0 6.79 0.54
 12 19 0 0.54 0.19
 12 -19 0 0.4 0.53
 -12 -19 0 -0.07 0.52
 12 19 0 0.59 0.25
 12 20 0 3.24 0.33
 12 20 0 3.6 0.43
 12 21 0 1.57 0.23
 12 21 0 1.49 0.26
 13 0 0 0.15 0.16
 13 1 0 0.15 0.19
 13 2 0 -0.28 0.17
 13 -2 0 -0.02 0.44
 13 3 0 -0.33 0.18
 13 -3 0 0.16 0.37
 13 -4 0 0.41 0.28
 13 -4 0 0.18 0.34
 13 4 0 0.05 0.19
 13 -5 0 0.12 0.26
 13 -5 0 0.07 0.27
 13 5 0 -0.06 0.21
 13 -6 0 0.13 0.3
 13 -6 0 -0.24 0.27
 13 6 0 0.13 0.23
 13 -7 0 0.26 0.38
 13 7 0 0.07 0.24
 13 -7 0 -0.11 0.33
 13 -7 0 -0.06 0.43
 13 -8 0 0.36 0.43
 13 -8 0 -0.05 0.47
 13 -8 0 -0.22 0.37
 13 9 0 -0.21 0.22
 -13 -9 0 -0.04 0.24
 13 9 0 0.35 0.35
 13 -9 0 -0.71 0.52
 13 -9 0 0.52 0.56
 13 -9 0 -0.29 0.25
 13 -9 0 -0.06 0.46
 13 -10 0 0.28 0.56
 13 10 0 0.08 0.36
 -13 -10 0 -0.17 0.24
 13 10 0 -0.11 0.24
 13 -10 0 0.14 0.28
 -13 -10 0 -0.36 0.23
 13 -10 0 0.96 0.62
 13 -10 0 -0.58 0.48
 -13 -11 0 0.45 0.27
 -13 -11 0 0.09 0.25
 13 -11 0 -1.1 0.57
 13 -11 0 0.06 0.69
 13 11 0 0.01 0.25
 13 -11 0 -0.17 0.3
 13 11 0 -0.16 0.35
 13 -11 0 0.23 0.73
 13 -12 0 0.71 0.75
 13 -12 0 -0.96 0.61
 13 -12 0 -0.53 0.67
 13 12 0 -0.33 0.37
 13 12 0 0.18 0.22
 -13 -12 0 -0.33 0.25
 -13 -12 0 -0.32 0.24
 13 12 0 -0.2 0.24
 13 13 0 -0.04 0.23
 13 -13 0 -0.62 0.77
 -13 -13 0 0.03 0.27
 13 13 0 -0.02 0.25
 13 13 0 0.17 0.42
 -13 -13 0 0.23 0.29
 13 14 0 0.13 0.42
 13 -14 0 -0.43 0.75
 13 14 0 0.1 0.24
 -13 -14 0 -0.06 0.28
 -13 -14 0 -0.04 0.3
 13 14 0 0.01 0.23
 13 15 0 0.01 0.24
 13 15 0 0.08 0.22
 -13 -15 0 -0.44 0.28
 -13 -15 0 -0.43 0.28
 13 -16 0 -1.53 0.7
 13 16 0 0.04 0.25
 -13 -16 0 0 0.28
 13 16 0 0.35 0.23
 -13 -16 0 -0.1 0.27
 13 17 0 0.13 0.26
 13 -17 0 -0.85 0.66
 13 17 0 0.1 0.19
 -13 -17 0 0.1 0.29
 -13 -17 0 0.03 0.54
 13 -18 0 -0.2 0.56
 -13 -18 0 0.06 0.5
 13 18 0 -0.08 0.22
 13 18 0 -0.03 0.16
 -13 -18 0 -0.45 0.25
 13 19 0 -0.03 0.15
 13 19 0 -0.33 0.2
 13 20 0 0.06 0.14
 13 20 0 0.08 0.19
 14 0 0 12.97 0.99
 14 1 0 0.28 0.2
 14 -1 0 0.36 0.19
 14 2 0 1.73 0.32
 14 -2 0 1.53 0.71
 14 -3 0 0.19 0.5
 14 3 0 0.55 0.22
 14 -4 0 0.24 0.46
 14 4 0 0.29 0.21
 14 5 0 12.24 1.01
 14 -5 0 14.06 2.28
 14 -5 0 14.07 1.24
 14 -6 0 14.11 1.26
 14 6 0 11.91 0.98
 14 -6 0 11.07 2.07
 14 -6 0 12.86 1.24
 14 -7 0 2.25 0.54
 14 7 0 1.36 0.31
 14 -7 0 0.55 0.49
 14 -7 0 1.27 0.54
 14 -8 0 0.85 0.55
 14 -8 0 0.85 0.53
 14 8 0 0.26 0.28
 -14 -8 0 0.75 0.27
 14 -8 0 -0.08 0.45
 14 -9 0 19.58 1.87
 14 9 0 17.11 1.34
 14 -9 0 19.3 1.75
 -14 -9 0 18.44 1.19
 14 -9 0 15.25 2.81
 -14 -9 0 20.51 1.25
 14 -10 0 0.39 0.64
 14 -10 0 0.96 0.72
 14 10 0 0.26 0.27
 -14 -10 0 0.63 0.26
 -14 -10 0 0.81 0.29
 14 -10 0 0.64 0.69
 14 -11 0 2.6 0.86
 -14 -11 0 3.11 0.43
 14 -11 0 2.07 0.88
 14 11 0 2.58 0.41
 14 -11 0 0.57 0.79
 -14 -11 0 3.09 0.47
 14 -12 0 4.86 1.2
 14 12 0 4.88 0.61
 14 -12 0 5.72 1.1
 -14 -12 0 5.15 0.53
 -14 -12 0 6.38 0.61
 -14 -13 0 2.3 0.38
 14 -13 0 1.71 0.99
 -14 -13 0 1.96 0.35
 14 13 0 1.85 0.37
 -14 -14 0 0.64 0.32
 14 14 0 0.54 0.3
 -14 -14 0 0.22 0.29
 -14 -15 0 5.25 0.61
 14 15 0 5.87 0.61
 14 15 0 4.86 0.51
 -14 -15 0 4.4 0.53
 -14 -16 0 0.8 0.28
 14 -16 0 -1.29 0.92
 -14 -16 0 1.27 0.33
 14 16 0 1.47 0.34
 14 16 0 1.19 0.24
 -14 -17 0 -0.3 0.24
 14 -17 0 -1.2 0.61
 -14 -17 0 -0.02 0.53
 14 17 0 -0.19 0.19
 14 17 0 -0.07 0.24
 14 18 0 0 0.23
 -14 -18 0 0.3 0.54
 14 -18 0 0.13 0.52
 -14 -18 0 -0.44 0.23
 14 19 0 2.22 0.38
 14 20 0 -0.17 0.18
 15 0 0 -0.05 0.21
 15 1 0 -0.02 0.2
 15 -1 0 -0.15 0.2
 15 -1 0 0.31 0.37
 15 2 0 -0.41 0.2
 15 -2 0 0.12 0.38
 15 -2 0 -0.4 0.2
 15 3 0 0.19 0.22
 15 -3 0 0.71 0.73
 15 -3 0 -0.15 0.39
 15 -4 0 0.28 0.63
 15 -4 0 -0.17 0.41
 15 4 0 -0.21 0.2
 15 -5 0 -0.27 0.59
 15 5 0 0.4 0.25
 15 -5 0 -0.1 0.4
 15 -6 0 0.04 0.44
 15 -6 0 -0.16 0.6
 -15 -6 0 -0.3 0.25
 15 6 0 0.05 0.24
 15 -7 0 -0.05 0.5
 -15 -7 0 -0.01 0.26
 15 7 0 -0.19 0.25
 15 7 0 -0.07 0.25
 15 -7 0 -0.2 0.39
 15 -7 0 -0.82 0.52
 -15 -8 0 0.15 0.25
 -15 -8 0 -0.08 0.24
 15 8 0 -0.15 0.25
 15 -8 0 0.1 0.5
 15 -8 0 0.48 0.51
 15 -9 0 0.54 0.57
 15 -9 0 0.05 0.61
 -15 -9 0 -0.06 0.27
 -15 -9 0 0.31 0.27
 15 9 0 -0.06 0.26
 15 -10 0 0.18 0.7
 -15 -10 0 0.03 0.28
 15 10 0 -0.31 0.26
 15 -10 0 0.53 0.72
 -15 -10 0 -0.24 0.24
 15 11 0 0.33 0.3
 15 -11 0 0.92 0.82
 15 -11 0 1.86 0.82
 -15 -11 0 0.14 0.27
 -15 -11 0 -0.14 0.26
 15 12 0 -0.35 0.27
 15 -12 0 -0.44 0.79
 -15 -12 0 0.4 0.31
 -15 -12 0 -0.29 0.25
 -15 -13 0 -0.36 0.27
 -15 -13 0 -0.48 0.28
 15 13 0 -0.12 0.29
 -15 -14 0 -0.51 0.27
 -15 -14 0 -0.61 0.27
 15 14 0 0.18 0.3
 -15 -15 0 -0.05 0.27
 -15 -15 0 -0.37 0.27
 15 15 0 0.03 0.28
 -15 -16 0 -0.41 0.25
 -15 -16 0 -0.64 0.25
 15 16 0 -0.17 0.25
 -15 -17 0 0.09 0.54
 -15 -17 0 0.12 0.26
 15 17 0 0.29 0.26
 15 -17 0 -0.58 0.68
 -15 -18 0 0 0.23
 15 18 0 0.32 0.22
 15 19 0 -0.05 0.19
 15 20 0 0.03 0.17
 16 0 0 1.72 0.3
 16 0 0 2.14 0.46
 16 1 0 0.01 0.4
 16 1 0 -0.08 0.22
 16 -1 0 0.16 0.41
 16 -1 0 0.12 0.22
 16 -2 0 2.65 0.48
 16 2 0 1.95 0.46
 16 -2 0 0.94 0.3
 16 2 0 1.12 0.28
 16 3 0 7.25 0.91
 16 -3 0 8.17 0.97
 16 3 0 6.62 0.66
 16 -3 0 7.72 0.71
 16 4 0 0.28 0.23
 16 -4 0 1.46 0.49
 16 -5 0 5.7 0.87
 16 -5 0 4.7 1.22
 16 5 0 4.95 0.57
 16 -6 0 1.57 0.95
 16 -6 0 2.59 0.63
 16 6 0 1.41 0.32
 -16 -6 0 1.44 0.33
 16 -7 0 12.47 1.33
 16 7 0 11.47 0.98
 -16 -7 0 12.49 0.89
 16 -7 0 13.25 3.16
 16 7 0 11.32 0.98
 16 -8 0 -0.34 0.92
 16 -8 0 0.35 0.58
 16 8 0 0.83 0.32
 -16 -8 0 1.17 0.31
 -16 -8 0 0.61 0.28
 16 -9 0 0.45 0.66
 -16 -9 0 0.17 0.27
 16 9 0 0.05 0.3
 16 -9 0 0.48 0.64
 16 -9 0 -2.04 0.86
 -16 -9 0 0.29 0.26
 -16 -10 0 1.22 0.32
 16 -10 0 1.04 0.75
 16 -10 0 -1.84 0.94
 16 10 0 1.19 0.36
 -16 -10 0 0.76 0.29
 16 -10 0 2.35 0.81
 16 -11 0 0.53 0.79
 -16 -11 0 0.36 0.28
 16 11 0 0.39 0.33
 -16 -11 0 0.22 0.28
 16 -11 0 0.02 0.78
 -16 -12 0 4.98 0.55
 16 12 0 4.99 0.66
 -16 -12 0 6.14 0.61
 -16 -13 0 -0.34 0.26
 16 13 0 0.04 0.3
 -16 -13 0 0.02 0.27
 -16 -14 0 0.92 0.29
 -16 -14 0 0.6 0.3
 16 14 0 1.22 0.36
 -16 -15 0 1.58 0.3
 -16 -15 0 0.76 0.31
 16 15 0 1.35 0.35
 16 16 0 -0.46 0.25
 -16 -16 0 0.1 0.25
 16 -16 0 -1.65 0.9
 -16 -16 0 -0.6 0.24
 -16 -17 0 0.44 0.25
 16 -17 0 -0.59 0.94
 16 17 0 0.72 0.27
 16 18 0 1.7 0.3
 -16 -18 0 0.81 0.25
 16 19 0 1.55 0.29
 17 0 0 -0.34 0.21
 17 0 0 -0.15 0.42
 17 -1 0 0.15 0.25
 17 1 0 -0.26 0.4
 17 1 0 -0.5 0.22
 17 -1 0 0.04 0.4
 17 2 0 -0.28 0.24
 17 -2 0 -0.11 0.4
 17 2 0 -0.12 0.42
 17 -2 0 -0.1 0.24
 17 -3 0 -0.52 0.43
 17 -3 0 -0.01 0.24
 17 3 0 0.08 0.24
 17 -4 0 0.08 0.26
 17 4 0 -0.09 0.24
 17 -4 0 -0.07 0.46
 17 6 0 -0.04 0.25
 17 -6 0 -0.07 0.53
 17 -6 0 1.81 1.26
 17 -7 0 0.54 0.59
 17 7 0 0.04 0.3
 17 -7 0 0.81 1.27
 17 7 0 0.19 0.27
 -17 -7 0 -0.09 0.27
 -17 -8 0 0.06 0.27
 -17 -8 0 0.04 0.26
 17 -8 0 0.44 1.32
 17 8 0 -0.16 0.31
 17 -8 0 -1.31 0.58
 -17 -9 0 -0.2 0.26
 17 -9 0 0.75 1.37
 -17 -9 0 -0.34 0.25
 17 -9 0 -0.14 0.63
 17 9 0 -0.11 0.3
 17 -10 0 -0.08 0.69
 -17 -10 0 -0.35 0.27
 -17 -10 0 -0.12 0.28
 17 10 0 0.17 0.34
 17 -10 0 -1.33 1.43
 17 11 0 -0.35 0.31
 17 -11 0 -3.56 1.57
 -17 -11 0 -0.06 0.28
 -17 -11 0 0 0.27
 17 -11 0 1.3 0.81
 -17 -12 0 -0.17 0.27
 -17 -12 0 -0.13 0.27
 17 12 0 0.25 0.35
 17 -12 0 -3.81 1.66
 -17 -13 0 -0.16 0.28
 17 13 0 0.39 0.35
 -17 -13 0 -0.14 0.27
 -17 -14 0 -0.11 0.27
 17 14 0 0.03 0.3
 -17 -14 0 -0.44 0.26
 17 -14 0 -3.06 1.49
 17 15 0 -0.38 0.28
 -17 -15 0 -0.71 0.24
 17 -15 0 -1.52 1.34
 -17 -15 0 -0.38 0.24
 17 16 0 -0.09 0.24
 17 -16 0 -0.02 1.24
 -17 -16 0 -0.48 0.24
 -17 -16 0 -0.72 0.24
 -17 -17 0 -0.01 0.21
 17 17 0 0.02 0.22
 -17 -18 0 -0.4 0.2
 17 18 0 -0.15 0.19
 18 0 0 2.15 0.38
 18 0 0 2.02 0.57
 18 -1 0 0.39 0.45
 18 1 0 0.12 0.24
 18 1 0 0.44 0.46
 18 -1 0 0.24 0.25
 18 -2 0 0.78 0.29
 18 2 0 -0.11 0.24
 18 -2 0 0.01 0.46
 18 2 0 0.29 0.47
 18 3 0 2.5 0.44
 18 -3 0 2.69 0.5
 18 -3 0 2.2 0.62
 18 -4 0 1.45 0.34
 18 -4 0 1.77 0.56
 18 4 0 0.51 0.28
 18 5 0 0.57 0.29
 18 -5 0 0.39 0.54
 18 -5 0 0.07 0.29
 18 6 0 -0.13 0.26
 18 -6 0 -0.35 0.54
 18 -6 0 -0.19 0.29
 18 -7 0 -0.24 0.59
 -18 -7 0 0.24 0.29
 -18 -8 0 18.41 1.2
 18 -8 0 19.98 1.85
 18 8 0 16.76 1.41
 -18 -8 0 18.79 1.26
 18 -9 0 18.41 5.35
 18 -9 0 2 0.75
 18 -10 0 -0.2 0.66
 18 -10 0 2.85 2.15
 -18 -10 0 -0.24 0.26
 -18 -10 0 -0.19 0.26
 18 10 0 -0.12 0.37
 -18 -11 0 2.88 0.42
 18 -11 0 2.86 0.86
 -18 -11 0 1.92 0.34
 18 11 0 2.71 0.51
 18 -11 0 3.58 2.42
 18 -12 0 0.13 2.69
 18 12 0 2.9 0.52
 -18 -12 0 2.96 0.46
 -18 -12 0 3.29 0.5
 -18 -13 0 1.48 0.33
 18 13 0 2.55 0.46
 -18 -13 0 1.52 0.34
 18 -13 0 0.5 1.9
 -18 -14 0 -0.16 0.24
 18 -14 0 -1.81 1.74
 18 14 0 0.01 0.31
 -18 -14 0 -0.08 0.24
 -18 -15 0 0.21 0.26
 18 -15 0 0.51 1.71
 -18 -15 0 0.31 0.26
 18 15 0 1.04 0.32
 -18 -16 0 0.89 0.23
 -18 -16 0 0.41 0.24
 18 16 0 0.3 0.26
 18 17 0 0.66 0.24
 -18 -17 0 0.26 0.21
 19 0 0 -0.04 0.46
 19 0 0 -0.01 0.26
 19 1 0 -0.05 0.26
 19 -1 0 -0.28 0.26
 19 -1 0 0.13 0.49
 19 1 0 0.2 0.48
 19 -2 0 -0.26 0.46
 19 2 0 0.25 0.49
 19 2 0 0.05 0.25
 19 -2 0 0.02 0.26
 19 3 0 0.34 0.26
 19 -3 0 0.16 0.3
 19 -3 0 0.23 0.5
 19 4 0 0.2 0.27
 19 -4 0 -0.21 0.53
 19 -4 0 0.4 0.32
 19 5 0 0 0.26
 19 -5 0 -0.18 0.29
 19 -5 0 -0.42 0.53
 19 -6 0 0.01 0.33
 19 -6 0 -0.2 0.55
 19 6 0 -0.46 0.26
 19 -7 0 0.92 0.37
 -19 -7 0 0.17 0.27
 19 -7 0 0.46 0.61
 -19 -8 0 -0.01 0.25
 19 -8 0 0.02 0.62
 19 -8 0 -0.2 0.35
 -19 -8 0 0.08 0.29
 -19 -9 0 0.02 0.26
 -19 -9 0 0.17 0.28
 19 9 0 -0.08 0.37
 19 -9 0 0.1 0.65
 19 -9 0 0.09 0.38
 19 12 0 0.35 0.34
 -19 -12 0 -0.15 0.26
 19 -12 0 -0.23 0.34
 -19 -12 0 -0.19 0.25
 19 -12 0 4.56 2.55
 -19 -13 0 -0.37 0.25
 19 13 0 0 0.34
 -19 -13 0 -0.14 0.24
 19 -13 0 -0.28 0.31
 19 -13 0 4.26 2.49
 -19 -14 0 -0.26 0.24
 -19 -14 0 -0.42 0.24
 19 14 0 0.06 0.29
 19 -14 0 2.75 2.33
 -19 -15 0 -0.57 0.21
 19 15 0 -0.03 0.26
 -19 -15 0 0.29 0.23
 -19 -16 0 -0.55 0.2
 -19 -16 0 0.06 0.21
 19 16 0 0.09 0.23
 19 17 0 -0.29 0.19
 20 0 0 2.78 0.45
 20 0 0 3.35 0.68
 20 -1 0 0.45 0.3
 20 1 0 0.7 0.29
 20 -1 0 1.19 0.57
 20 1 0 0.76 0.54
 20 -2 0 0.15 0.31
 20 -2 0 -0.04 0.51
 20 2 0 0.15 0.27
 20 -3 0 0.75 0.33
 20 3 0 0.21 0.28
 20 -3 0 0.3 0.54
 20 -4 0 10.56 1.29
 20 4 0 9.98 0.93
 20 -4 0 12.9 1.04
 20 -5 0 0.7 0.37
 20 5 0 0.44 0.28
 20 -5 0 0.54 0.59
 20 -6 0 5.66 0.76
 20 6 0 5.05 0.59
 20 -6 0 5.24 0.92
 -20 -7 0 0.02 0.29
 20 -7 0 -0.02 0.37
 20 -7 0 0.24 0.63
 20 -8 0 16.28 1.22
 -20 -8 0 11.77 0.9
 20 -8 0 11.24 1.5
 -20 -8 0 11.13 0.92
 -20 -9 0 0.68 0.28
 20 -9 0 1.26 0.72
 20 -9 0 0.65 0.41
 20 9 0 0.91 0.43
 -20 -9 0 0.61 0.3
 20 -10 0 0.74 0.73
 -20 -10 0 0.64 0.27
 -20 -10 0 0.43 0.26
 20 -10 0 0.96 0.43
 20 10 0 0.53 0.41
 -20 -11 0 6.19 0.63
 20 -11 0 8.19 0.84
 20 11 0 6.02 0.81
 -20 -11 0 6.62 0.59
 -20 -12 0 11.44 0.84
 -20 -12 0 11.38 0.87
 20 12 0 12.37 1.06
 20 13 0 0.2 0.31
 -20 -13 0 0.14 0.22
 -20 -13 0 -0.11 0.23
 -20 -14 0 -0.07 0.23
 20 14 0 0.68 0.32
 -20 -14 0 0.88 0.25
 -20 -15 0 0.31 0.21
 -20 -15 0 1.02 0.23
 20 15 0 0.81 0.28
 20 16 0 1.3 0.27
 21 0 0 -0.09 0.26
 21 0 0 0.85 0.55
 21 1 0 -0.87 0.5
 21 -1 0 -0.14 0.3
 21 -1 0 -0.05 0.53
 21 1 0 -0.2 0.26
 21 -2 0 0.12 0.53
 21 -2 0 0.09 0.3
 21 2 0 -0.16 0.26
 21 3 0 -0.09 0.26
 21 -3 0 0.33 0.54
 21 -3 0 0.06 0.32
 21 4 0 0.11 0.27
 21 -4 0 -0.23 0.33
 21 -4 0 0.07 0.55
 21 -5 0 -0.42 0.32
 21 5 0 0 0.28
 21 -5 0 0.18 0.58
 21 -6 0 0.44 0.38
 21 -6 0 -0.57 0.55
 21 -7 0 -0.31 0.39
 21 -7 0 -0.2 0.6
 21 -8 0 -0.23 0.38
 -21 -8 0 0.01 0.27
 21 -8 0 0.06 0.64
 -21 -8 0 -0.34 0.25
 21 -9 0 0.86 0.72
 -21 -9 0 -0.04 0.25
 -21 -9 0 -0.05 0.26
 21 -9 0 -0.21 0.39
 -21 -10 0 0.03 0.26
 21 -10 0 -0.22 0.39
 -21 -10 0 -0.34 0.23
 -21 -11 0 0.33 0.25
 21 -11 0 -0.36 0.37
 -21 -11 0 0.11 0.24
 21 11 0 -0.02 0.42
 21 12 0 0.26 0.37
 -21 -12 0 -0.21 0.23
 -21 -12 0 0.12 0.22
 -21 -13 0 -0.15 0.22
 21 13 0 -0.12 0.31
 -21 -13 0 -0.37 0.21
 -21 -14 0 -0.4 0.19
 -21 -14 0 -0.5 0.19
 21 14 0 0 0.28
 22 0 0 7.97 0.77
 22 0 0 7.86 1.14
 22 -1 0 6.2 1.07
 22 1 0 6.22 0.68
 22 -1 0 6.41 0.69
 22 -2 0 0.4 0.57
 22 2 0 0.57 0.3
 22 -2 0 0.72 0.34
 22 -3 0 3.73 0.8
 22 -3 0 5.05 0.66
 22 3 0 4.01 0.55
 22 -4 0 11.55 1.44
 22 -4 0 15.47 1.18
 22 4 0 11.86 1.05
 22 -5 0 16.94 1.38
 22 -5 0 15 1.65
 22 -6 0 8.41 0.9
 22 -6 0 6.19 1.18
 22 -7 0 14.01 1.65
 22 -7 0 16.56 1.36
 22 -8 0 5.77 0.99
 22 -8 0 7.96 0.82
 -22 -8 0 4.79 0.52
 -22 -8 0 5.33 0.58
 -22 -9 0 0.31 0.24
 -22 -9 0 0.86 0.28
 22 -9 0 1.42 0.69
 22 -9 0 0.57 0.44
 -22 -10 0 1.38 0.28
 -22 -10 0 1.44 0.29
 -22 -11 0 8.74 0.64
 -22 -11 0 8.39 0.69
 -22 -12 0 0.34 0.22
 -22 -12 0 0.24 0.23
 -22 -13 0 0.31 0.21
 -22 -13 0 0.65 0.22
 23 0 0 -0.09 0.3
 23 -1 0 0.16 0.31
 23 1 0 0.04 0.29
 23 -1 0 -0.76 0.56
 23 -2 0 0.2 0.32
 23 2 0 0.2 0.29
 23 -2 0 -0.12 0.59
 23 -3 0 0.35 0.6
 23 3 0 0.25 0.29
 23 -3 0 -0.23 0.32
 23 -4 0 0.08 0.36
 23 4 0 -0.1 0.27
 23 -4 0 0.14 0.61
 23 -5 0 -0.14 0.62
 23 -5 0 0.02 0.38
 23 -6 0 0.61 0.42
 23 -6 0 0.59 0.66
 23 -7 0 0.24 0.41
 -23 -7 0 0.08 0.24
 23 -7 0 1.07 0.63
 23 -8 0 -0.15 0.61
 -23 -8 0 -0.1 0.23
 -23 -9 0 -0.18 0.22
 -23 -9 0 -0.21 0.24
 -23 -10 0 -0.49 0.22
 -23 -10 0 -0.13 0.2
 -23 -11 0 -0.14 0.19
 -23 -11 0 -0.27 0.2
 -23 -12 0 0.08 0.2
 24 0 0 0.27 0.3
 24 1 0 5.6 0.64
 24 -1 0 5.79 0.67
 24 -2 0 0.78 0.35
 24 2 0 0.37 0.31
 24 -2 0 0.11 0.65
 24 -3 0 11.46 1.03
 24 -3 0 11.52 1.41
 24 -4 0 1.17 0.41
 24 -4 0 0.93 0.68
 24 -5 0 10.25 1.35
 24 -6 0 1.99 0.73
 24 -7 0 17.89 1.76
 -24 -8 0 0.34 0.23
 -24 -9 0 4.86 0.44
 -24 -10 0 -0.03 0.19
 25 -3 0 0.95 0.71
 0 3 1 0.01 0.07
 0 4 1 23.33 1.89
 0 4 -1 26.47 1.88
 0 5 1 0.12 0.11
 0 5 1 0.05 0.15
 0 5 -1 0.09 0.1
 0 6 1 150.76 11.06
 0 6 1 145.55 9.58
 0 6 -1 152.51 11.05
 0 6 -1 144.7 9.57
 0 7 1 -0.01 0.16
 0 7 1 0.16 0.12
 0 7 -1 0.09 0.14
 0 7 -1 0.19 0.12
 0 8 1 11.41 0.87
 0 8 -1 12.22 0.95
 0 8 1 11.87 0.96
 0 8 -1 10.9 0.85
 0 9 -1 -0.11 0.12
 0 9 1 0.17 0.18
 0 9 1 0.33 0.16
 0 9 -1 0.12 0.15
 0 10 1 125.46 9.2
 0 10 -1 122.78 7.98
 0 10 -1 122.33 9.19
 0 10 1 120.6 7.99
 0 11 -1 0.04 0.16
 0 11 -1 0.03 0.18
 0 11 1 -0.03 0.16
 0 11 1 0.15 0.2
 0 12 -1 59.82 4.57
 0 12 -1 65.24 4.01
 0 12 1 64.55 4.59
 0 12 1 65.23 4.03
 0 -12 -1 54.37 7.32
 0 -12 1 48.73 7.31
 0 13 -1 0.06 0.2
 0 13 1 0.02 0.2
 0 -13 1 0.1 0.51
 0 13 1 0.02 0.18
 0 -13 -1 0.05 0.47
 0 14 -1 89.25 5.55
 0 -14 1 75.03 10.05
 0 14 1 91.41 5.57
 0 -14 -1 77.24 10.03
 0 15 1 0.11 0.23
 0 -15 -1 -0.46 0.42
 0 15 -1 0.17 0.22
 0 -15 1 -0.02 0.19
 0 -15 1 0.46 0.52
 0 15 1 0.13 0.16
 0 -16 1 9.31 0.86
 0 16 -1 11.77 0.91
 0 16 -1 9.65 0.7
 0 -16 -1 10.84 1.91
 0 16 1 9.43 0.7
 0 16 1 11.41 0.92
 0 -16 1 9.33 1.9
 0 -17 1 0.04 0.51
 0 17 1 0.06 0.24
 0 -17 -1 0.22 0.5
 0 17 1 0.02 0.18
 0 17 -1 -0.16 0.17
 0 17 -1 -0.1 0.23
 0 18 1 65.4 3.57
 0 18 -1 60.86 4.18
 0 -18 -1 60.24 7.61
 0 18 -1 62.98 3.56
 0 -18 1 65.13 7.68
 0 18 1 56.27 4.16
 0 -19 -1 0.14 0.46
 0 19 1 -0.21 0.17
 0 19 -1 0.05 0.18
 0 -19 1 -0.34 0.4
 0 20 -1 25.89 1.57
 0 20 1 25.74 1.56
 0 20 -1 23.97 1.55
 0 -20 -1 25.36 3.51
 0 -20 1 27.82 3.56
 0 20 1 25.65 1.56
 0 -21 -1 -0.42 0.36
 0 -21 1 -0.02 0.43
 0 21 1 0.04 0.18
 0 21 -1 -0.15 0.17
 0 21 1 -0.03 0.17
 0 21 -1 -0.19 0.17
 0 22 1 12.68 0.91
 0 22 -1 13.44 0.91
 0 22 1 15.62 0.92
 0 -22 1 13.06 2.15
 0 22 -1 15.14 0.92
 0 -22 -1 14.43 2.15
 0 23 -1 -0.08 0.16
 0 23 1 -0.31 0.14
 0 24 1 22.42 1.33
 0 24 -1 21.77 1.33
 1 1 -1 0.89 0.06
 1 3 1 5.86 0.47
 -1 3 1 5.65 0.46
 1 3 -1 5.59 0.46
 1 4 1 0.4 0.12
 -1 4 -1 0.46 0.1
 1 4 -1 0.59 0.12
 -1 4 1 0.41 0.11
 1 5 1 22.06 1.61
 -1 5 -1 24.26 1.82
 1 5 1 25.61 1.84
 -1 5 1 23.28 1.62
 1 5 -1 23.75 1.83
 1 5 -1 25.9 1.61
 -1 5 1 22.98 1.82
 -1 6 -1 0.48 0.15
 -1 6 -1 0.34 0.11
 1 6 1 0.4 0.14
 1 6 1 0.21 0.16
 1 6 -1 0.81 0.17
 -1 6 1 0.26 0.16
 -1 6 1 0.28 0.12
 1 6 -1 0.57 0.14
 1 7 1 5.21 0.48
 -1 7 -1 5.1 0.46
 1 7 1 5.4 0.49
 -1 7 -1 4.19 0.44
 -1 7 1 5.18 0.48
 1 7 -1 5.3 0.45
 -1 7 1 5.3 0.48
 1 7 -1 5.3 0.47
 1 8 1 2.96 0.36
 -1 8 -1 2.6 0.34
 1 8 1 2.88 0.35
 -1 8 -1 3.06 0.32
 -1 8 1 3.1 0.38
 1 8 -1 2.96 0.34
 -1 8 1 2.89 0.33
 1 8 -1 3.11 0.35
 1 9 1 0.86 0.21
 -1 9 -1 0.91 0.21
 1 9 1 0.87 0.23
 -1 9 -1 0.71 0.17
 1 9 -1 0.92 0.2
 1 9 -1 0.75 0.21
 -1 9 1 0.88 0.2
 -1 9 1 0.86 0.22
 1 10 1 6.27 0.62
 1 10 1 6.58 0.6
 -1 10 -1 6.17 0.59
 -1 10 -1 6.58 0.58
 -1 10 1 6.98 0.61
 -1 10 1 6.75 0.61
 1 10 -1 7.35 0.59
 1 10 -1 6.8 0.61
 1 11 1 0.7 0.25
 -1 11 -1 0.59 0.18
 -1 11 -1 0.7 0.22
 1 11 1 0.46 0.2
 -1 11 1 0.68 0.2
 1 11 -1 0.39 0.21
 -1 11 1 0.79 0.23
 1 11 -1 0.75 0.2
 -1 -12 1 1.99 0.69
 1 12 1 3.7 0.42
 1 -12 -1 2.19 0.79
 1 12 1 3.26 0.42
 -1 12 -1 3.62 0.41
 1 12 -1 3.78 0.43
 -1 12 1 3.54 0.43
 -1 -12 -1 1.97 0.74
 1 -12 1 1.97 0.74
 1 12 -1 2.53 0.38
 -1 12 1 3.01 0.4
 1 -13 -1 0.07 0.45
 -1 13 -1 0.4 0.22
 -1 -13 1 0.23 0.51
 1 13 1 0.09 0.2
 1 13 1 0.59 0.25
 1 13 -1 0.34 0.21
 -1 13 1 0.18 0.22
 -1 -13 -1 0.16 0.5
 1 -13 1 0 0.52
 -1 14 -1 7.21 0.65
 1 14 1 5.84 0.67
 1 14 1 7.95 0.68
 -1 -14 1 5.18 1.53
 1 -14 -1 6.15 1.54
 1 -14 1 4.62 1.49
 -1 -14 -1 7.69 1.56
 -1 14 1 6.97 0.65
 1 14 -1 7.24 0.65
 -1 15 -1 0.47 0.23
 -1 -15 1 0.32 0.51
 1 15 1 0.19 0.23
 1 15 1 0.01 0.17
 1 -15 -1 0.09 0.49
 1 15 -1 0.05 0.22
 -1 -15 -1 -0.18 0.47
 -1 15 1 0.07 0.22
 1 15 -1 -0.22 0.16
 1 -15 1 -0.11 0.45
 1 -15 1 0.2 0.22
 -1 -16 1 5.12 1.37
 1 16 1 4.4 0.55
 1 16 1 3.75 0.39
 -1 16 -1 4.6 0.53
 1 -16 -1 2.75 0.89
 1 16 -1 4.56 0.54
 1 -16 1 2.59 0.89
 -1 16 1 4.47 0.54
 1 16 -1 4.16 0.4
 1 -16 1 4.31 0.53
 -1 -16 -1 4.71 1.26
 -1 -17 1 0.02 0.48
 1 17 1 0.68 0.28
 1 -17 -1 0.69 0.54
 1 17 1 1.04 0.22
 -1 17 -1 0.39 0.26
 -1 -17 -1 0.27 0.51
 1 -17 1 -0.01 0.51
 1 17 -1 0.24 0.26
 1 17 -1 0.66 0.2
 -1 17 1 0.68 0.29
 1 18 1 0.45 0.2
 -1 -18 1 -0.17 0.45
 1 18 1 0.26 0.26
 -1 18 -1 0.12 0.26
 1 18 1 0.19 0.18
 1 -18 -1 0.24 0.51
 1 18 -1 0.19 0.18
 -1 -18 -1 -0.28 0.44
 1 -18 1 0.59 0.53
 -1 18 1 0.21 0.28
 1 -18 1 -0.02 0.49
 1 18 -1 -0.09 0.24
 1 18 -1 -0.07 0.17
 1 19 1 0.08 0.19
 -1 -19 1 0.44 0.53
 1 19 1 0.29 0.18
 1 -19 -1 0.29 0.48
 -1 -19 -1 0.23 0.47
 1 19 -1 0.24 0.18
 1 19 -1 0.06 0.18
 1 -19 1 -0.29 0.46
 1 20 1 4.55 0.42
 1 20 1 4.32 0.42
 -1 -20 1 4.58 1.26
 1 -20 -1 4.07 1.25
 1 20 -1 4.17 0.42
 1 -20 1 2.49 0.84
 -1 -20 -1 3.9 1.21
 1 20 -1 4.44 0.42
 1 21 1 1.17 0.22
 1 21 1 0.82 0.21
 1 -21 -1 0.75 0.5
 -1 -21 1 0.83 0.5
 -1 21 1 1.21 0.22
 1 21 -1 0.61 0.21
 1 -21 1 0.72 0.49
 1 21 -1 0.7 0.21
 -1 -21 -1 0.44 0.49
 -1 22 -1 -0.01 0.18
 1 -22 -1 0.53 0.43
 1 22 1 0.12 0.17
 1 22 1 0.43 0.19
 -1 -22 1 0.2 0.41
 1 -22 1 0.29 0.41
 -1 22 1 0.21 0.18
 1 22 -1 0.38 0.18
 1 22 -1 0.24 0.18
 1 23 1 -0.07 0.15
 -1 23 -1 0.02 0.17
 1 23 1 0.17 0.15
 1 23 -1 -0.04 0.16
 1 23 -1 0 0.15
 -1 23 1 0.26 0.16
 1 24 1 0.07 0.14
 1 24 -1 0.19 0.14
 2 0 -1 0.12 0.03
 2 0 1 0.06 0.03
 -2 0 -1 0.08 0.03
 -2 -1 1 119.33 6.87
 2 1 1 116.46 6.88
 -2 -1 -1 115.86 6.88
 2 -1 1 105.13 6.88
 2 1 -1 117.26 6.87
 -2 -2 1 244.15 14.23
 2 2 1 230.97 17.65
 -2 -2 -1 232.49 14.23
 2 2 -1 243.48 14.23
 2 3 1 41.86 3.05
 -2 -3 1 39.97 2.45
 2 3 -1 39.87 3.04
 2 4 1 14.36 1.09
 2 4 -1 14.1 1.08
 -2 4 1 13.28 1.07
 -2 5 -1 8.37 0.66
 2 5 1 8.21 0.63
 2 5 1 8.38 0.69
 -2 5 1 8.11 0.67
 2 5 -1 8.32 0.68
 2 5 -1 8.19 0.62
 -2 6 -1 32.7 2.24
 -2 6 -1 33.39 2.55
 2 6 1 34.81 2.26
 2 6 1 35.11 2.58
 2 6 -1 37.81 2.58
 2 6 -1 34.29 2.25
 -2 6 1 33.1 2.56
 -2 6 1 29.16 2.24
 -2 7 -1 15.94 1.26
 2 7 1 16.57 1.16
 2 7 1 17.87 1.3
 -2 7 -1 15.3 1.13
 2 7 -1 17.01 1.28
 -2 7 1 15.27 1.14
 -2 7 1 15 1.26
 2 7 -1 17.14 1.15
 2 8 1 0.64 0.2
 -2 8 -1 0.29 0.12
 2 8 1 0.26 0.16
 -2 8 -1 0.42 0.17
 -2 8 1 0.26 0.14
 2 8 -1 0.22 0.18
 -2 8 1 0.32 0.18
 2 8 -1 0.34 0.15
 -2 9 -1 61.73 4.17
 -2 9 -1 61.64 4.78
 2 9 1 65.42 4.81
 2 9 1 70.6 4.21
 2 9 -1 65.01 4.8
 2 9 -1 66.11 4.19
 -2 9 1 59.02 4.78
 -2 9 1 60.09 4.18
 2 10 1 42.95 2.74
 2 10 1 41.1 3.11
 -2 10 -1 39.55 3.07
 -2 10 -1 39.17 2.7
 2 10 -1 40.35 3.1
 -2 10 1 38.36 2.71
 -2 10 1 40.68 3.09
 2 10 -1 41.26 2.72
 2 11 1 1.91 0.32
 -2 11 -1 1.86 0.34
 2 11 1 1.66 0.32
 2 -11 1 0.83 0.66
 -2 11 1 1.72 0.31
 2 11 -1 1.96 0.31
 2 11 -1 2.19 0.35
 -2 11 1 1.7 0.31
 -2 -12 1 0.95 0.55
 -2 12 -1 1.58 0.29
 2 12 1 1.74 0.34
 2 -12 -1 1.49 0.62
 2 12 1 1.63 0.32
 2 -12 1 1.11 0.66
 2 12 -1 1.94 0.32
 -2 -12 -1 0.67 0.54
 -2 12 1 1.82 0.33
 2 -13 -1 55.03 6.75
 2 13 1 56.44 4.17
 -2 -13 1 50.27 6.63
 2 13 1 57.41 3.67
 -2 13 -1 60.1 3.64
 2 -13 1 44.47 6.72
 2 13 -1 57.83 3.65
 -2 13 1 54.82 3.64
 -2 -13 -1 47.81 6.61
 2 14 1 59.75 3.85
 2 14 1 56.04 4.38
 -2 14 -1 61.82 3.83
 -2 -14 1 53.4 7
 2 -14 -1 55.59 7.06
 2 -14 1 48.1 7.04
 -2 -14 -1 52.53 6.98
 -2 14 1 62.63 3.84
 2 14 -1 58.93 3.83
 2 -15 -1 1.5 0.72
 2 15 1 3.42 0.46
 -2 -15 1 1.53 0.71
 -2 15 -1 2.89 0.43
 2 15 1 2.87 0.34
 2 15 -1 3.41 0.45
 2 -15 1 2.71 0.44
 -2 15 1 3.12 0.45
 2 -15 1 2.03 0.81
 2 15 -1 3.63 0.34
 -2 -15 -1 1.8 0.74
 -2 16 -1 11.48 0.94
 2 16 1 10 0.76
 2 16 1 11.88 0.96
 2 -16 -1 13.43 2.09
 2 16 1 10.62 0.75
 -2 -16 1 12.68 2.08
 2 16 -1 10.25 0.76
 -2 -16 -1 10.46 1.98
 2 -16 1 10.16 2.06
 2 16 -1 12.02 0.96
 -2 16 1 11.58 0.96
 2 -16 1 10.39 0.94
 2 16 -1 10.94 0.76
 2 17 1 33.34 2.47
 2 17 1 37.04 2.09
 2 17 1 32.67 2.09
 -2 -17 1 37.5 4.66
 -2 17 -1 36.03 2.46
 2 -17 -1 36.43 4.67
 -2 17 1 37.05 2.48
 2 17 -1 36.88 2.09
 2 -17 1 37.99 3.08
 2 17 -1 35.62 2.1
 2 17 -1 33.37 2.46
 2 -17 1 31.26 4.64
 -2 -17 -1 30.78 4.53
 -2 -18 1 29.94 3.95
 2 -18 -1 20.95 2.52
 2 18 1 29.34 1.74
 -2 18 -1 28.21 2.06
 2 18 1 27.05 2.08
 2 18 1 30.17 1.74
 2 -18 -1 28.78 3.96
 2 18 -1 32.45 1.75
 2 -18 1 26.8 2.57
 -2 18 1 29.04 2.08
 2 18 -1 27.55 2.06
 2 18 -1 31.31 1.76
 -2 -18 -1 30.41 3.92
 2 -18 1 26.99 3.94
 -2 -19 1 0.1 0.5
 2 19 1 0.15 0.18
 2 19 1 0.42 0.19
 2 -19 -1 0.01 0.48
 2 19 -1 0.27 0.2
 2 19 -1 0.17 0.18
 -2 -19 -1 0.04 0.47
 2 -19 1 -0.3 0.49
 2 -20 -1 17.6 2.65
 2 20 1 17.01 1.11
 2 20 1 17.14 1.11
 -2 -20 1 18.59 2.65
 2 20 -1 18 1.11
 2 20 -1 17.4 1.11
 -2 -20 -1 16.15 2.55
 2 -20 1 16.18 2.61
 2 21 1 7.78 0.6
 2 -21 -1 7.26 1.58
 -2 -21 1 8.61 1.58
 2 21 1 7.88 0.6
 -2 -21 -1 6.57 1.5
 2 21 -1 8.81 0.61
 2 21 -1 7.9 0.6
 2 -21 1 8.43 1.63
 2 22 1 12.13 0.72
 2 22 1 9.46 0.7
 -2 -22 1 10.12 1.75
 2 22 -1 9.23 0.7
 2 22 -1 11.12 0.72
 2 -22 1 8.53 1.7
 -2 23 -1 0.02 0.16
 2 23 1 0.03 0.15
 2 23 1 0.14 0.15
 -2 23 1 -0.03 0.15
 2 23 -1 0.17 0.17
 2 23 -1 0.14 0.17
 2 24 1 13.9 0.89
 2 24 -1 14.67 0.9
 3 0 -1 0.04 0.05
 3 0 1 0.03 0.04
 -3 0 -1 0.06 0.05
 -3 -1 1 37.03 2.12
 3 1 1 35.43 2.13
 -3 1 -1 34.14 2.13
 3 1 1 34.76 2.63
 3 1 -1 34.3 2.12
 -3 -1 -1 35.61 2.13
 3 -1 1 35.03 2.13
 3 2 1 0.37 0.1
 -3 -2 1 0.37 0.06
 3 2 1 0.33 0.07
 3 -2 1 0.27 0.07
 3 2 -1 0.38 0.07
 -3 -2 -1 0.2 0.07
 3 3 1 5.46 0.46
 -3 -3 1 5.56 0.35
 -3 -3 -1 4.98 0.36
 3 4 1 13.92 0.95
 -3 -4 1 13.2 0.84
 3 4 1 14.29 1.08
 3 4 -1 13.93 0.94
 3 4 -1 13.78 1.07
 -3 -4 -1 12.54 0.86
 -3 -5 1 3.94 0.28
 3 5 1 4.5 0.4
 3 5 1 4.09 0.39
 -3 5 -1 3.66 0.34
 3 5 -1 3.87 0.38
 -3 5 1 3.55 0.35
 3 5 -1 4.17 0.37
 -3 -6 1 17.83 1.24
 3 6 1 22.2 1.57
 -3 6 -1 17.89 1.36
 -3 6 -1 19.15 1.52
 3 6 1 20.77 1.39
 -3 6 1 21.07 1.54
 3 6 -1 20.04 1.37
 3 6 -1 21.62 1.56
 -3 7 -1 1.6 0.22
 -3 7 -1 1.52 0.27
 3 7 1 1.95 0.29
 3 7 1 2.34 0.3
 -3 -7 1 1.42 0.18
 -3 7 1 1.55 0.23
 3 7 -1 1.83 0.26
 -3 7 1 1.52 0.25
 3 7 -1 1.72 0.27
 -3 8 -1 6.74 0.59
 -3 -8 1 6.13 0.51
 3 8 1 7.37 0.64
 -3 8 -1 7.36 0.62
 3 8 1 8.32 0.67
 3 8 -1 7.93 0.62
 3 8 -1 7.91 0.67
 -3 8 1 7.68 0.64
 -3 8 1 7.2 0.62
 -3 9 -1 12.83 1
 3 9 1 14.99 1.05
 3 9 1 14.73 1.14
 3 9 -1 14.19 1.13
 -3 9 1 13.33 1.11
 -3 9 1 12.79 1.01
 3 9 -1 13.75 1.03
 3 10 1 0.89 0.26
 3 10 1 1.07 0.24
 -3 10 -1 0.97 0.24
 3 10 -1 1.15 0.26
 -3 10 1 1.03 0.25
 -3 10 1 0.97 0.21
 3 10 -1 1.03 0.24
 3 -11 -1 0.84 0.54
 3 11 1 -0.04 0.18
 -3 11 -1 0.15 0.19
 3 11 1 -0.12 0.2
 3 11 -1 0.01 0.19
 3 -11 1 0.31 0.59
 -3 11 1 0.07 0.19
 3 12 1 1.88 0.34
 -3 12 -1 1.75 0.31
 3 12 1 2.05 0.36
 3 -12 -1 1.35 0.68
 -3 12 1 2 0.34
 3 -12 1 1.42 0.74
 3 12 -1 2.1 0.35
 3 13 1 16.43 1.38
 3 13 1 17.01 1.26
 -3 13 -1 17.41 1.23
 -3 -13 1 13.98 2.4
 3 -13 -1 16.31 2.59
 -3 -13 -1 13.42 2.4
 3 13 -1 18.15 1.25
 -3 13 1 17.76 1.25
 3 -13 1 14.74 2.62
 -3 -14 1 -0.24 0.42
 3 -14 -1 0.23 0.55
 3 14 1 -0.13 0.22
 -3 14 -1 -0.04 0.2
 3 -14 1 -0.04 0.57
 3 14 -1 0.23 0.24
 -3 -14 -1 -0.41 0.39
 3 -14 1 0.1 0.21
 -3 14 1 0.02 0.21
 3 15 1 0.09 0.17
 -3 -15 1 -0.06 0.47
 -3 15 -1 -0.16 0.2
 3 15 1 -0.03 0.24
 3 -15 -1 0.39 0.52
 3 15 1 0.27 0.2
 3 15 -1 0.05 0.16
 -3 15 1 -0.25 0.19
 3 15 -1 -0.1 0.23
 -3 -15 -1 -0.07 0.47
 3 15 -1 -0.08 0.18
 3 -15 1 0.31 0.25
 3 -15 1 -0.1 0.54
 3 16 1 0.15 0.24
 3 16 1 0.36 0.19
 3 -16 -1 -0.06 0.49
 -3 16 -1 0.34 0.26
 -3 -16 1 -0.15 0.48
 3 16 1 0.33 0.19
 3 16 -1 0.05 0.25
 3 16 -1 0.04 0.18
 3 -16 1 0.16 0.54
 3 -16 1 0.21 0.27
 3 -16 1 0.25 0.49
 -3 16 1 0.14 0.25
 3 16 -1 0.21 0.17
 -3 -16 -1 0.27 0.5
 -3 17 -1 3.18 0.53
 3 17 1 4.48 0.43
 3 17 1 4.07 0.57
 3 -17 -1 2.85 0.95
 -3 -17 1 4.56 1.38
 3 -17 -1 3.57 0.83
 3 17 1 5.38 0.44
 3 17 -1 4.53 0.44
 3 -17 1 2.35 0.94
 -3 17 1 3.57 0.55
 3 17 -1 5.48 0.44
 -3 -17 -1 4.66 1.33
 3 -17 1 5.45 0.9
 3 17 -1 3.93 0.55
 -3 -18 1 0.45 0.51
 3 -18 -1 1.02 0.56
 3 18 1 -0.21 0.26
 3 18 1 -0.17 0.17
 3 18 1 -0.04 0.18
 3 -18 -1 -0.22 0.49
 3 18 -1 0.12 0.18
 -3 -18 -1 0.2 0.49
 3 18 -1 0.15 0.19
 3 18 -1 0.08 0.27
 3 -18 1 -0.13 0.5
 -3 18 1 -0.13 0.29
 3 -18 1 0.41 0.49
 3 19 1 0.38 0.2
 3 19 1 0.21 0.2
 3 -19 -1 0.33 0.53
 -3 -19 1 0.13 0.5
 3 19 -1 0.41 0.19
 3 19 -1 0.34 0.2
 3 -19 1 0.2 0.49
 -3 -19 -1 0.15 0.47
 3 20 1 0.5 0.2
 3 -20 -1 -0.05 0.47
 3 20 1 0.17 0.19
 -3 -20 1 0.13 0.46
 -3 -20 -1 -0.07 0.45
 3 20 -1 0.08 0.18
 3 -20 1 0 0.5
 3 20 -1 0.36 0.19
 3 -21 -1 0.87 0.51
 3 21 1 1.61 0.25
 -3 -21 1 0.66 0.5
 3 21 1 1.34 0.23
 3 -21 1 1.21 0.58
 -3 -21 -1 0.62 0.48
 3 21 -1 1.15 0.23
 3 21 -1 1.47 0.24
 3 22 1 -0.01 0.16
 3 22 1 0.28 0.18
 3 22 -1 0.38 0.18
 3 -22 1 0.22 0.4
 3 22 -1 0 0.16
 3 23 1 0.11 0.15
 3 23 1 0.21 0.15
 3 23 -1 0.2 0.16
 3 23 -1 0.25 0.16
 3 24 1 0.2 0.13
 3 24 -1 -0.22 0.12
 4 0 1 0.01 0.05
 4 0 1 -0.06 0.06
 -4 0 -1 0.09 0.06
 4 0 -1 0.1 0.06
 -4 -1 1 181.61 10.24
 4 1 1 177.6 10.24
 4 -1 -1 170 10.24
 -4 1 -1 168.2 10.24
 4 -1 1 172.08 10.24
 4 -1 1 145.78 10.67
 4 1 -1 172.15 10.23
 -4 -1 -1 179.3 10.24
 4 2 1 172.96 12.86
 4 2 1 180.33 10.37
 -4 -2 1 178.5 10.37
 4 2 -1 177.76 10.37
 4 -2 1 149.46 10.81
 4 -2 1 172.99 10.37
 -4 -2 -1 179.11 10.38
 -4 -3 1 46.82 2.78
 4 3 1 47.13 3.47
 -4 -3 -1 43.2 2.79
 4 3 -1 46.97 2.78
 4 4 1 11.42 0.92
 4 4 1 12.09 0.82
 -4 -4 1 11.32 0.72
 -4 -4 -1 10.2 0.73
 4 -4 1 11.38 0.98
 4 4 -1 12.38 0.81
 -4 -5 1 102.14 6.24
 4 5 1 113.72 6.72
 4 5 1 111.15 7.75
 -4 5 -1 90.47 7.7
 -4 5 1 99.63 7.72
 4 -5 1 103.97 7.83
 -4 -5 -1 98.34 6.25
 4 5 -1 111.33 6.71
 -4 6 -1 0.47 0.11
 4 6 1 0.42 0.16
 4 6 1 0.51 0.18
 -4 -6 1 0.49 0.1
 -4 -6 -1 0.41 0.11
 -4 6 1 0.48 0.12
 4 6 -1 0.54 0.17
 -4 7 -1 22.09 1.51
 4 7 1 22.34 1.54
 -4 7 -1 22.6 1.68
 4 7 1 24.12 1.74
 -4 -7 1 20.92 1.38
 4 7 -1 22.36 1.52
 -4 7 1 23.26 1.7
 4 7 -1 22.62 1.73
 -4 -7 -1 18.28 1.39
 4 8 1 11.17 0.85
 4 8 1 11.59 0.92
 -4 -8 1 9.61 0.71
 -4 8 -1 10.54 0.81
 -4 8 1 9.71 0.81
 4 8 -1 11.09 0.83
 4 8 -1 11.26 0.91
 -4 8 1 10.89 0.87
 -4 9 -1 83.75 5.52
 4 9 1 85.56 5.56
 4 9 1 87.45 6.38
 -4 9 1 81.62 5.53
 -4 9 1 83.62 6.34
 4 9 -1 85.17 5.54
 4 10 1 1.01 0.29
 -4 10 -1 1.13 0.25
 4 10 1 1.03 0.25
 4 10 -1 1.46 0.28
 -4 10 1 1.04 0.26
 4 11 1 2.17 0.37
 -4 11 -1 2.05 0.33
 4 -11 -1 1.54 0.62
 4 11 1 1.64 0.34
 4 11 -1 1.87 0.33
 -4 11 1 1.86 0.33
 4 -11 1 1.15 0.73
 4 12 1 3.51 0.47
 4 12 1 2.98 0.42
 -4 12 -1 3.74 0.42
 4 -12 -1 1.93 0.77
 4 -12 1 1.64 0.81
 -4 12 1 2.9 0.42
 4 12 -1 2.84 0.43
 4 13 1 103.01 6.56
 -4 13 -1 105 6.51
 4 -13 -1 100.24 11.89
 4 -13 1 87.84 11.89
 -4 13 1 100.42 6.53
 4 13 -1 105.7 6.55
 -4 -13 -1 89.6 11.67
 -4 14 -1 7.64 0.66
 4 -14 -1 7.54 1.71
 4 14 1 6.68 0.54
 -4 -14 1 6.14 1.48
 4 14 1 7.43 0.7
 4 14 -1 6.92 0.68
 -4 -14 -1 7.38 1.49
 4 14 -1 7.02 0.54
 -4 14 1 7.15 0.67
 4 -14 1 5.69 1.7
 4 -14 1 5.61 0.63
 4 -14 1 7.66 1.02
 -4 15 -1 4.61 0.53
 -4 -15 1 4.76 1.38
 4 15 1 4.84 0.43
 4 -15 -1 2.64 0.94
 4 15 1 5.85 0.61
 4 15 1 4.73 0.42
 4 15 -1 3.92 0.42
 4 15 -1 4.82 0.56
 4 -15 1 2.72 0.98
 4 15 -1 5.82 0.44
 4 -15 1 5.03 0.9
 -4 15 1 3.45 0.51
 4 -15 1 4.84 0.57
 4 16 1 4.04 0.4
 4 -16 -1 1.96 0.89
 4 -16 -1 4.28 0.56
 -4 16 -1 4.68 0.53
 -4 -16 1 4.54 1.41
 4 16 1 4.45 0.57
 4 16 1 3.48 0.39
 4 -16 -1 4.82 0.93
 4 -16 1 4.64 0.85
 4 16 -1 4.85 0.43
 4 16 -1 3.67 0.54
 -4 16 1 3.96 0.54
 -4 -16 -1 5.19 1.37
 4 -16 1 4.48 0.57
 4 16 -1 3.71 0.41
 4 -16 1 2.47 0.94
 4 17 1 61.56 3.46
 4 -17 -1 62.97 7.45
 -4 -17 1 61.27 7.37
 4 17 1 58.65 4.03
 4 17 1 63.65 3.44
 4 -17 -1 51.21 4.81
 4 17 -1 62.32 3.46
 4 -17 1 58.08 7.47
 4 17 -1 62.41 3.44
 -4 -17 -1 54 7.28
 4 -17 1 54.22 4.79
 4 17 -1 56.99 4.01
 -4 17 1 58.46 4.01
 -4 -18 1 0.75 0.58
 4 18 1 1.15 0.24
 4 18 1 1.62 0.38
 4 -18 -1 1.31 0.7
 4 18 1 1.15 0.24
 4 -18 -1 1.51 0.59
 -4 -18 -1 0.55 0.54
 4 -18 1 1.13 0.57
 4 18 -1 1.46 0.25
 4 18 -1 1.15 0.34
 4 -18 1 0.44 0.59
 -4 18 1 0.66 0.32
 4 18 -1 1.12 0.24
 4 19 1 2.63 0.35
 -4 -19 1 1.38 0.64
 4 19 1 2.72 0.35
 4 -19 -1 1.21 0.66
 4 -19 1 1.93 0.76
 4 19 -1 3.24 0.36
 -4 -19 -1 1.28 0.66
 4 19 -1 2.58 0.34
 4 -20 -1 1.29 0.67
 -4 -20 1 4.08 1.21
 4 20 1 2.86 0.35
 4 20 1 3 0.35
 -4 -20 -1 2.23 0.73
 4 20 -1 3.31 0.36
 4 20 -1 3.13 0.36
 4 -20 1 1.63 0.72
 4 21 1 37.9 2.18
 4 21 1 38.09 2.19
 -4 -21 1 36.07 4.7
 4 -21 -1 35.08 4.68
 4 21 -1 40.03 2.19
 -4 -21 -1 35.83 4.66
 4 21 -1 37.02 2.18
 4 -21 1 32.03 4.65
 4 22 1 1.94 0.3
 4 22 1 2.24 0.31
 4 22 -1 2.38 0.31
 4 22 -1 1.87 0.3
 4 23 1 0.09 0.15
 4 23 1 0.46 0.16
 4 23 -1 0.17 0.16
 4 23 -1 0.29 0.14
 -5 0 -1 0.01 0.07
 5 0 -1 0.02 0.07
 5 0 1 -0.03 0.05
 5 0 1 -0.1 0.07
 5 -1 -1 0.25 0.08
 5 1 1 0.19 0.08
 -5 -1 1 0.25 0.07
 -5 -1 -1 0.39 0.09
 5 -1 1 0.27 0.08
 5 -1 1 0.45 0.08
 5 1 -1 0.2 0.08
 -5 -2 1 17.1 1.06
 5 2 1 18.02 1.07
 5 -2 -1 16.59 1.06
 5 -2 1 17.19 1.06
 5 2 -1 17.64 1.14
 -5 -2 -1 17.47 1.07
 5 2 -1 17.22 1.06
 5 -2 1 17.5 1.35
 5 -2 1 14.96 1.11
 5 3 1 52.29 3.06
 5 3 1 53.31 3.29
 5 3 1 50.16 3.8
 5 -3 -1 49.45 3.83
 -5 -3 1 49.94 3.05
 5 -3 1 50.44 3.06
 -5 -3 -1 47.66 3.06
 5 3 -1 53.88 3.29
 5 -3 1 46.33 3.83
 5 3 -1 50.79 3.05
 5 -4 -1 2.82 0.42
 -5 -4 1 2.87 0.22
 5 4 1 2.7 0.33
 5 4 1 2.88 0.3
 -5 -4 -1 2.02 0.22
 5 -4 1 2.85 0.39
 5 -4 1 2.74 0.24
 5 4 -1 3.13 0.3
 5 5 1 1.32 0.25
 -5 -5 1 1.4 0.15
 5 -5 -1 1.66 0.34
 5 5 1 1.61 0.24
 -5 5 -1 1 0.16
 5 -5 1 1.49 0.31
 -5 -5 -1 1.26 0.16
 5 5 -1 1.42 0.25
 5 6 1 3.78 0.4
 -5 -6 1 3.67 0.28
 5 6 1 4.27 0.42
 -5 6 1 3.31 0.35
 5 -6 1 4.22 0.55
 5 6 -1 3.83 0.39
 -5 -6 -1 3.51 0.3
 5 7 1 8.85 0.75
 -5 -7 1 7.84 0.56
 5 7 1 8.64 0.7
 5 7 -1 8.02 0.68
 5 -7 1 8.53 0.92
 -5 7 1 8.46 0.69
 -5 8 -1 2.08 0.33
 -5 -8 1 2.81 0.26
 5 8 1 2.93 0.38
 5 8 1 2.9 0.4
 5 -8 1 3.39 0.64
 -5 8 1 2.89 0.32
 5 8 -1 3.01 0.39
 -5 9 -1 19.89 1.5
 5 9 1 21.75 1.55
 5 9 1 22.77 1.74
 5 -9 1 23.78 1.95
 -5 9 1 21.13 1.52
 5 9 -1 21.61 1.54
 -5 10 -1 0.05 0.19
 5 10 1 0.06 0.22
 5 10 1 0.19 0.19
 -5 10 1 0.19 0.21
 5 -10 1 -0.1 0.37
 5 10 -1 0.3 0.21
 5 11 1 5.58 0.58
 -5 11 -1 5.3 0.53
 5 -11 -1 4.87 1.4
 5 11 1 4.97 0.56
 5 11 -1 4.82 0.55
 -5 11 1 5.29 0.54
 5 -11 1 4.93 0.87
 5 -12 -1 -0.09 0.52
 -5 12 -1 -0.04 0.19
 5 12 1 0.21 0.25
 -5 12 1 0.1 0.22
 5 12 -1 -0.12 0.2
 5 -12 1 -0.46 0.56
 5 -12 1 -0.12 0.41
 5 13 1 14.32 1.14
 -5 13 -1 14.46 1.08
 5 -13 -1 12.89 2.4
 5 -13 1 14.88 1.09
 5 -13 1 11.13 2.45
 5 -13 1 15.42 1.51
 5 13 -1 13.94 1.11
 -5 13 1 13.07 1.08
 -5 14 -1 -0.01 0.21
 5 -14 -1 0.18 0.6
 5 -14 -1 -0.01 0.51
 5 14 1 0.17 0.17
 5 14 1 0.31 0.28
 5 14 -1 0.14 0.17
 5 -14 1 0.11 0.43
 5 -14 1 0.05 0.23
 -5 -14 -1 -0.21 0.4
 5 -14 1 0.21 0.63
 -5 14 1 0 0.22
 5 14 -1 0.1 0.24
 5 15 1 0.36 0.27
 5 15 1 0.21 0.18
 -5 -15 1 0.1 0.45
 -5 15 -1 0.54 0.26
 5 15 1 0.64 0.22
 5 -15 -1 0.25 0.53
 5 15 1 0.4 0.19
 5 -15 -1 0.17 0.57
 5 15 -1 -0.03 0.19
 5 15 -1 0.03 0.24
 5 15 -1 0.19 0.17
 5 15 -1 0.28 0.19
 5 -15 1 0.54 0.5
 5 -15 1 -0.12 0.59
 5 -15 1 0.03 0.26
 -5 15 1 0.25 0.25
 -5 -15 -1 0.09 0.44
 5 -16 -1 1.54 0.79
 5 16 1 2.57 0.33
 5 16 1 2.34 0.33
 -5 -16 1 1.21 0.66
 5 -16 -1 2.2 0.67
 5 16 1 2.24 0.46
 5 -16 1 2.09 0.68
 5 16 -1 2.47 0.34
 5 16 -1 2.29 0.43
 -5 -16 -1 1.48 0.68
 -5 16 1 2.45 0.42
 5 16 -1 1.86 0.31
 5 -16 1 1.51 0.76
 5 16 -1 2.54 0.34
 5 17 1 14.69 0.96
 5 -17 -1 14.51 2.55
 5 17 1 13.51 1.19
 5 17 1 15.38 0.96
 5 -17 -1 13.34 1.58
 -5 -17 1 14.25 2.41
 -5 17 1 13.34 1.16
 -5 -17 -1 14.2 2.37
 5 17 -1 15.53 0.97
 5 -17 1 12.65 1.5
 5 -17 1 13.68 2.55
 5 17 -1 16.08 0.96
 5 17 -1 13.17 1.17
 -5 -18 1 0.7 0.56
 5 18 1 0.38 0.2
 5 18 1 0.66 0.2
 5 -18 -1 0.23 0.55
 5 18 -1 0.51 0.21
 5 18 -1 0.64 0.2
 5 -18 1 0.12 0.57
 -5 -18 -1 0.19 0.53
 5 19 1 2.98 0.35
 5 19 1 2.4 0.34
 5 -19 -1 1.25 0.67
 -5 -19 1 1.58 0.67
 -5 -19 -1 1.49 0.65
 5 -19 1 1.4 0.73
 5 19 -1 2.5 0.33
 5 19 -1 2.96 0.35
 5 -20 -1 0.43 0.52
 5 20 1 0.83 0.21
 -5 -20 1 0.61 0.51
 5 20 1 0.97 0.22
 5 20 -1 0.96 0.22
 5 20 -1 0.72 0.22
 5 -20 1 0.02 0.48
 -5 -20 -1 0.53 0.5
 5 21 1 11.78 0.77
 -5 -21 1 9.68 1.85
 5 -21 -1 12.38 1.87
 5 21 1 10.33 0.76
 5 -21 1 11.12 1.89
 5 21 -1 11.12 0.76
 -5 -21 -1 10.51 1.86
 5 21 -1 11.31 0.77
 5 22 1 0.03 0.16
 5 22 1 0.22 0.16
 5 22 -1 0.1 0.16
 5 22 -1 0.14 0.16
 5 23 1 0.01 0.14
 5 23 1 0.22 0.15
 5 23 -1 0.25 0.15
 5 23 -1 0.31 0.14
 6 0 -1 0.04 0.07
 -6 0 -1 0.09 0.09
 6 0 1 -0.05 0.08
 6 0 1 0 0.07
 6 0 -1 -0.08 0.08
 -6 -1 1 24.9 1.51
 6 -1 -1 26.35 1.9
 6 1 1 24.5 1.51
 6 -1 -1 23.79 1.51
 -6 -1 -1 25.72 1.52
 6 -1 1 26.54 1.9
 6 -1 1 23.79 1.51
 6 1 -1 23.86 1.51
 6 -1 1 21.74 1.56
 6 2 1 38.31 2.41
 6 -2 -1 38.77 2.82
 6 -2 -1 35.42 2.26
 6 2 1 37 2.26
 -6 -2 1 37.62 2.25
 6 -2 1 33.01 2.35
 6 -2 1 36.81 2.26
 6 2 -1 36.84 2.41
 6 2 -1 36.31 2.25
 6 -2 1 39.47 2.83
 -6 -2 -1 37.21 2.26
 -6 -3 1 39.79 2.46
 6 -3 -1 39.28 2.47
 6 3 1 42.14 2.47
 6 3 1 42.91 2.65
 6 -3 -1 42.47 3.1
 6 3 -1 40.56 2.46
 6 3 -1 41.02 2.64
 -6 -3 -1 39.46 2.47
 6 -3 1 41.26 3.1
 6 -3 1 40.14 2.47
 6 -3 1 35.68 2.57
 6 4 1 0.29 0.14
 -6 -4 1 0.23 0.08
 6 -4 -1 0.27 0.2
 6 -4 1 0.05 0.1
 6 4 -1 0.24 0.12
 6 4 -1 0.07 0.09
 6 -4 1 0.33 0.2
 -6 -4 -1 0.22 0.09
 6 -5 -1 139.7 9.99
 6 5 1 143.86 8.58
 -6 -5 1 126.01 7.97
 6 5 1 127.79 9.9
 6 -5 1 134.27 7.99
 6 -5 1 140.3 9.99
 -6 -5 -1 117.66 7.98
 6 5 -1 131.8 8.57
 6 6 1 6.41 0.64
 6 6 1 7.3 0.61
 6 -6 -1 7.47 0.8
 -6 -6 1 6.93 0.49
 6 6 -1 7.05 0.58
 6 -6 1 7.77 0.77
 6 7 1 28.19 2.11
 -6 -7 1 24.67 1.67
 6 -7 -1 26.62 2.25
 6 7 1 27.16 1.86
 6 7 -1 27.75 1.85
 6 -7 1 26.9 2.22
 6 -8 -1 0.9 0.45
 6 8 1 0.94 0.26
 6 8 1 0.73 0.23
 6 -8 1 0.86 0.4
 6 8 -1 0.81 0.24
 6 -9 -1 77.36 5.94
 6 9 1 80.02 5.72
 -6 9 -1 72.49 4.94
 6 9 1 78.78 5
 6 9 -1 73.69 4.97
 6 -9 1 69.2 5.85
 6 -10 -1 13 2.17
 -6 10 -1 14.49 1.05
 6 -10 -1 14.56 1.5
 6 10 1 15.34 1.13
 6 -10 1 15.26 1.44
 6 -10 1 12.86 2.35
 -6 10 1 12.44 1.05
 6 10 -1 14.25 1.09
 6 11 1 13.92 1.13
 6 -11 -1 15.85 1.56
 -6 11 -1 14.11 1.07
 6 -11 -1 12.89 2.3
 6 -11 1 10.73 2.39
 6 -11 1 15.37 1.47
 -6 11 1 14.71 1.09
 6 11 -1 14.28 1.11
 -6 12 -1 12.19 0.98
 6 -12 -1 13.65 1.46
 6 -12 -1 11.46 2.21
 6 12 1 13 1.06
 -6 12 1 11.76 1
 6 -12 1 12.78 0.99
 6 -12 1 10.81 2.33
 6 12 -1 13.78 1.04
 6 -12 1 13.15 1.38
 6 -13 -1 39.75 5.33
 6 13 1 41.54 2.83
 6 -13 -1 37.15 3.44
 -6 13 -1 42.03 2.76
 6 13 -1 40.7 2.8
 6 -13 1 40.18 3.42
 -6 13 1 42.49 2.78
 6 -13 1 41.93 2.73
 6 -13 1 34.26 5.35
 -6 -14 1 9.81 0.77
 6 14 1 10.95 0.94
 6 -14 -1 13.83 1.39
 -6 14 -1 11.19 0.87
 6 -14 -1 9.74 2.15
 6 14 1 10.31 0.72
 6 14 1 9.89 0.71
 6 14 -1 8.96 0.89
 6 -14 1 11.76 1.31
 6 14 -1 9.77 0.71
 6 14 -1 9.65 0.8
 6 -14 1 8 2.09
 6 -14 1 11.17 0.91
 -6 14 1 10.7 0.89
 6 14 -1 10.25 0.72
 -6 -14 -1 9.65 0.77
 6 -15 -1 1.84 0.73
 6 15 1 2.61 0.33
 6 15 1 2.47 0.37
 6 15 1 2.37 0.47
 6 -15 -1 2.38 0.45
 6 15 1 3 0.34
 6 -15 -1 1.67 0.84
 -6 -15 1 1.8 0.7
 6 15 -1 2.76 0.34
 -6 15 1 2.41 0.43
 6 -15 1 0.95 0.81
 6 -15 1 3.49 0.75
 6 15 -1 2.24 0.35
 -6 -15 -1 1.72 0.7
 6 15 -1 2.85 0.47
 6 15 -1 2.95 0.34
 6 -15 1 2.43 0.44
 -6 -16 1 5.58 1.41
 6 -16 -1 3.19 0.85
 6 -16 -1 6.02 1.7
 6 16 1 4.68 0.44
 6 16 1 4.9 0.61
 6 16 1 4.77 0.49
 6 16 1 5 0.45
 6 -16 1 2.98 1.11
 6 16 -1 3.84 0.55
 6 16 -1 4.96 0.45
 6 16 -1 4.27 0.48
 6 16 -1 4.3 0.43
 -6 16 1 4.75 0.59
 -6 -16 -1 4.23 1.37
 6 -16 1 5.39 0.9
 -6 -17 1 32.08 4.18
 6 -17 -1 24.36 2.67
 6 17 1 27.66 2.2
 6 17 1 31.62 1.85
 6 17 1 29.69 2.05
 6 -17 -1 32.15 4.29
 6 17 1 33.68 1.86
 6 17 -1 34.01 1.86
 6 17 -1 31.68 1.85
 6 -17 1 29.1 4.31
 6 -17 1 28.01 2.68
 6 17 -1 28.29 2.18
 -6 -17 -1 31.57 4.15
 6 17 -1 29.81 2.05
 6 -18 -1 1.19 0.7
 6 18 1 2.81 0.36
 6 18 1 2.49 0.35
 -6 -18 1 1.64 0.71
 6 18 -1 2.48 0.39
 -6 -18 -1 1.23 0.67
 6 18 -1 2.85 0.35
 6 -18 1 0.88 0.73
 6 18 -1 1.88 0.27
 6 19 1 0.34 0.2
 6 19 1 0.48 0.2
 -6 -19 1 0.26 0.5
 6 -19 -1 0.27 0.57
 6 19 -1 0.22 0.19
 -6 -19 -1 0.37 0.49
 6 -19 1 -0.55 0.5
 6 19 -1 0.43 0.21
 6 -20 -1 0.07 0.46
 6 20 1 0.15 0.18
 -6 -20 1 0.16 0.46
 6 20 1 0.02 0.18
 6 -20 1 -0.07 0.44
 6 20 -1 0.01 0.17
 -6 -20 -1 0.11 0.48
 6 20 -1 0.2 0.18
 6 21 1 37.69 2.19
 -6 -21 1 37.31 4.72
 6 -21 -1 33.93 4.65
 6 21 1 40.42 2.2
 6 21 -1 36.42 2.19
 6 21 -1 37.83 2.19
 6 -21 1 33.84 4.66
 6 22 1 1.52 0.22
 6 22 1 1.38 0.21
 6 22 -1 1.55 0.21
 6 22 -1 1.01 0.21
 6 23 1 0.29 0.13
 6 23 1 0.17 0.15
 6 23 -1 0.37 0.15
 6 23 -1 0.42 0.13
 7 0 1 0.09 0.07
 7 0 -1 -0.18 0.07
 7 0 1 0.1 0.09
 7 0 -1 0.11 0.09
 -7 0 -1 0 0.09
 7 1 1 22.47 1.4
 -7 -1 1 22.02 1.4
 7 -1 -1 24.27 1.41
 7 -1 -1 21.72 1.44
 7 -1 -1 24.09 1.76
 7 -1 1 22.21 1.4
 7 -1 1 23.32 1.76
 7 1 -1 22.03 1.4
 7 -1 1 20.14 1.44
 -7 -1 -1 23.39 1.41
 7 -2 -1 22.19 1.43
 7 -2 -1 26.37 1.81
 7 2 1 22.24 1.43
 7 2 1 24.62 1.53
 -7 -2 1 22.78 1.43
 7 -2 1 22.56 1.43
 -7 -2 -1 21.72 1.43
 7 -2 1 25.28 1.81
 7 2 -1 23.08 1.43
 7 -2 1 19.36 1.48
 7 3 1 19.97 1.27
 7 -3 -1 22.47 1.62
 7 3 1 21.59 1.36
 -7 -3 1 19.73 1.26
 7 -3 -1 18.88 1.27
 7 -3 1 18.31 1.32
 7 3 -1 20.28 1.36
 -7 -3 -1 20.17 1.27
 7 3 -1 19.98 1.26
 7 -3 1 19.08 1.26
 7 -3 1 21.26 1.61
 7 -4 -1 6.27 0.48
 -7 -4 1 6.15 0.45
 7 -4 -1 7.22 0.67
 7 4 1 6.86 0.53
 7 4 -1 7.14 0.53
 -7 -4 -1 6.08 0.47
 7 -4 1 6.21 0.52
 7 -4 1 6.88 0.66
 7 -4 1 6.85 0.48
 7 4 -1 6.37 0.46
 7 -5 -1 47.97 3.49
 7 5 1 46.94 2.96
 -7 -5 1 40.87 2.73
 7 -5 1 44.56 3.47
 7 -5 1 43.25 2.88
 7 5 -1 45.82 2.95
 7 -5 1 43.97 2.74
 7 6 1 3.59 0.4
 7 -6 -1 4.47 0.57
 7 -6 1 3.4 0.56
 7 6 -1 3.54 0.39
 7 -6 1 3.05 0.32
 7 -7 -1 0.49 0.33
 7 7 1 0.57 0.23
 7 7 -1 0.32 0.19
 7 -7 1 0.39 0.29
 7 -8 -1 1.17 0.47
 7 8 1 1.13 0.29
 7 -8 1 1.08 0.4
 7 8 -1 1.45 0.29
 -7 9 -1 4.14 0.48
 7 -9 -1 5.07 0.84
 7 9 1 5.06 0.55
 7 -9 1 4.83 0.75
 7 9 -1 5.09 0.53
 -7 10 -1 8.18 0.68
 7 -10 -1 8.29 1.67
 7 10 1 6.81 0.73
 7 -10 -1 8.62 1.08
 7 -10 1 6.68 1.74
 7 -10 1 7.02 0.96
 7 10 -1 7.88 0.71
 -7 10 1 7.32 0.68
 7 -11 -1 1.24 0.66
 7 11 1 1.43 0.37
 7 -11 -1 1.44 0.63
 -7 11 -1 1.92 0.34
 -7 11 1 1.54 0.33
 7 -11 1 1.51 0.55
 7 11 -1 2.48 0.42
 7 -11 1 1.28 0.79
 7 -11 1 2.15 0.36
 7 -12 -1 10.89 1.29
 -7 12 -1 9.89 0.82
 7 12 1 9.6 0.89
 7 -12 -1 8.12 1.96
 7 -12 1 10.61 1.2
 7 12 -1 10.01 0.87
 7 -12 1 7.1 2.1
 7 -12 1 10.48 0.83
 -7 12 1 8.58 0.82
 7 -13 -1 2.12 0.7
 -7 13 -1 2.97 0.44
 -7 -13 1 1.85 0.34
 7 13 1 2.44 0.47
 7 -13 -1 1.84 0.78
 7 13 1 2.25 0.32
 7 13 -1 2.52 0.46
 -7 13 1 2.77 0.44
 7 13 -1 2.73 0.33
 7 -13 1 1.22 0.85
 7 -13 1 3.08 0.7
 7 -13 1 2.67 0.43
 -7 -13 -1 2.5 0.37
 7 -14 -1 1.23 0.34
 7 14 1 1.06 0.22
 -7 -14 1 0.86 0.28
 7 -14 -1 1.01 0.66
 7 -14 -1 0.19 0.62
 7 14 1 0.92 0.36
 7 14 1 0.98 0.25
 7 14 1 1.11 0.23
 7 -14 1 1.23 0.33
 7 14 -1 1.2 0.34
 -7 -14 -1 0.61 0.29
 -7 14 1 1.08 0.33
 7 14 -1 1.24 0.22
 7 -14 1 0.93 0.78
 7 14 -1 1.01 0.22
 7 -14 1 1.15 0.54
 7 14 -1 1.36 0.27
 7 15 1 0.63 0.21
 -7 -15 1 0.75 0.28
 7 -15 -1 0.31 0.3
 7 15 1 0.23 0.3
 7 15 1 0.51 0.2
 7 -15 -1 0.16 0.62
 7 15 1 0.48 0.23
 7 -15 -1 -0.07 0.54
 7 -15 1 0.22 0.71
 7 15 -1 0.55 0.3
 7 -15 1 0.11 0.29
 7 -15 1 0.72 0.55
 7 15 -1 0.2 0.21
 -7 15 1 0.26 0.29
 -7 -15 -1 0.55 0.29
 7 15 -1 0.37 0.19
 7 15 -1 0.2 0.19
 7 16 1 0.27 0.27
 7 -16 -1 -0.13 0.6
 -7 -16 1 0.22 0.55
 7 16 1 0.46 0.23
 7 16 1 0.41 0.2
 7 -16 -1 0.01 0.48
 7 16 1 0.43 0.2
 7 -16 1 0.1 0.66
 7 16 -1 0.37 0.19
 7 16 -1 0.67 0.2
 7 16 -1 0.17 0.21
 7 16 -1 0.48 0.29
 -7 -16 -1 -0.21 0.44
 7 -16 1 0.61 0.51
 7 17 1 4.21 0.43
 7 17 1 5.08 0.61
 7 17 1 4.83 0.44
 7 -17 -1 4.52 0.92
 7 -17 -1 2.91 1.01
 7 17 1 3.52 0.48
 7 17 -1 4.85 0.5
 -7 -17 -1 4.93 1.45
 7 -17 1 2.01 0.95
 7 17 -1 4.07 0.56
 7 17 -1 4.8 0.44
 7 -17 1 3.81 0.86
 7 17 -1 4.47 0.44
 7 18 1 3.05 0.36
 7 -18 -1 1.54 0.77
 7 18 1 3.31 0.38
 -7 -18 1 1.41 0.69
 7 18 1 2.71 0.41
 7 18 -1 2.76 0.4
 7 18 -1 3.23 0.37
 7 18 -1 3.02 0.36
 -7 -18 -1 2.18 0.75
 7 -18 1 1.39 0.83
 7 19 1 2.57 0.34
 7 19 1 2.77 0.34
 7 -19 -1 1.14 0.65
 -7 -19 1 1.42 0.68
 7 19 -1 2.69 0.34
 -7 -19 -1 1.31 0.65
 7 19 -1 2.53 0.34
 7 19 -1 2.32 0.39
 7 -19 1 0.69 0.63
 -7 -20 1 0.52 0.49
 7 -20 -1 0.44 0.47
 7 20 1 0.36 0.2
 7 20 1 0.76 0.2
 -7 -20 -1 0.29 0.49
 7 20 -1 0.37 0.18
 7 -20 1 0.41 0.52
 7 20 -1 0.54 0.2
 7 21 1 2.4 0.33
 -7 -21 1 3.65 1.12
 7 -21 -1 3.59 1.09
 7 21 1 3.05 0.35
 7 21 -1 2.56 0.33
 7 21 -1 2.93 0.34
 7 22 1 8.16 0.54
 7 22 1 6.8 0.54
 7 22 -1 8.05 0.54
 7 22 -1 6.7 0.54
 7 23 1 0.32 0.14
 7 23 1 0.18 0.12
 7 23 -1 0.59 0.14
 7 23 -1 0.66 0.16
 8 0 -1 0.1 0.1
 8 0 1 0.04 0.09
 8 0 1 -0.06 0.07
 8 -1 -1 26.68 1.83
 8 -1 -1 21.6 1.45
 8 -1 -1 21.44 1.49
 8 1 1 24.09 1.46
 8 -1 1 22.62 1.46
 8 1 -1 23.56 1.46
 8 -1 1 21.13 1.49
 8 -1 1 26.61 1.84
 8 -2 -1 39.29 2.71
 8 -2 -1 31.31 2.24
 8 -2 -1 34.54 2.16
 -8 -2 1 37.37 2.17
 8 2 1 34.36 2.16
 8 -2 1 39.78 2.72
 8 2 -1 35.2 2.16
 8 -2 1 30.89 2.23
 8 -2 1 34.12 2.16
 8 -3 -1 7.42 0.53
 8 3 1 7.16 0.52
 8 3 1 8.17 0.57
 8 -3 -1 7.49 0.71
 8 -3 1 6.8 0.52
 8 -3 1 8.19 0.7
 8 -3 1 6.5 0.55
 8 3 -1 7.8 0.57
 8 3 -1 7.42 0.52
 8 4 1 0.83 0.15
 8 -4 -1 0.44 0.23
 8 4 1 0.57 0.16
 8 -4 -1 0.62 0.15
 8 -4 1 0.27 0.16
 8 4 -1 0.78 0.17
 8 4 -1 0.83 0.15
 8 -4 1 0.42 0.22
 8 -4 1 0.74 0.15
 8 -5 -1 41.92 3.28
 8 5 1 44.09 2.79
 8 -5 1 38.62 2.71
 8 -5 1 42.89 3.28
 8 5 -1 42.42 2.78
 8 -6 -1 46.27 3.7
 8 6 1 48.2 3.14
 8 -6 1 43.82 3.04
 8 -6 1 49.23 3.7
 8 6 -1 48.42 3.14
 8 -7 -1 2.73 0.54
 8 7 1 3.75 0.44
 8 -7 1 2.96 0.55
 8 -7 1 3.14 0.39
 8 7 -1 3.53 0.42
 8 -8 -1 0.34 0.39
 8 8 1 0.94 0.28
 8 8 -1 0.64 0.24
 8 -8 1 0.88 0.24
 8 -8 1 0.65 0.4
 8 -9 -1 5.85 0.95
 8 -9 -1 8.06 1.54
 8 9 1 5.96 0.68
 8 -9 1 7.6 0.63
 8 9 -1 6.92 0.67
 8 -9 1 8.48 1.6
 8 -9 1 5.77 0.9
 -8 10 -1 49.4 3.47
 8 -10 -1 55.62 6.48
 8 10 1 50.45 3.54
 8 -10 -1 44.59 4.21
 8 10 -1 50.86 3.52
 8 -10 1 59.15 3.44
 8 -10 1 52.9 6.56
 8 -10 1 52.94 4.24
 -8 11 -1 8.5 0.79
 8 -11 -1 9.03 1.22
 8 11 1 9.56 0.87
 8 -11 -1 8.7 1.97
 8 -11 1 5.42 1.94
 8 -11 1 9.05 1.16
 8 11 -1 9.48 0.84
 8 -11 1 11.05 0.82
 -8 11 1 10.08 0.83
 8 -12 -1 22.31 2.16
 8 -12 -1 20.39 3.32
 8 12 1 23.07 1.69
 8 -12 1 22.41 2.11
 -8 12 1 22.55 1.63
 8 -12 1 17.98 3.39
 8 -12 1 24.34 1.62
 8 12 -1 21.54 1.65
 8 13 1 3 0.53
 8 -13 -1 3.19 0.48
 -8 -13 1 3.02 0.4
 8 13 1 2.23 0.36
 8 13 1 2.28 0.39
 8 -13 -1 2.78 0.79
 8 -13 -1 1.86 0.83
 8 13 1 2.99 0.34
 8 13 -1 2.3 0.36
 8 -13 1 0.84 0.84
 8 13 -1 2.89 0.48
 8 13 -1 2.23 0.39
 8 -13 1 3.06 0.45
 8 13 -1 2.62 0.33
 -8 -13 -1 3.19 0.42
 8 -13 1 3.69 0.82
 -8 13 1 3.27 0.49
 8 14 1 10.39 0.73
 8 -14 -1 9.97 2.25
 8 14 1 9.92 0.83
 8 -14 -1 11.06 1.37
 -8 -14 1 8.23 0.71
 8 14 1 10.6 0.99
 -8 -14 1 11.61 0.81
 8 -14 -1 12.05 0.95
 8 14 1 11.24 0.75
 8 14 -1 10.74 0.95
 8 -14 1 12.09 0.95
 -8 -14 -1 12.17 0.82
 8 14 -1 10.5 0.84
 8 14 -1 11.28 0.75
 -8 14 1 10.57 0.93
 -8 -14 -1 8.16 0.72
 8 -14 1 9.72 2.36
 8 -14 1 12.03 1.38
 8 14 -1 10.13 0.74
 8 15 1 2.63 0.36
 -8 -15 1 2.33 0.37
 8 -15 -1 1.86 0.89
 8 15 1 2.43 0.35
 8 15 1 3.77 0.55
 8 15 1 2.21 0.38
 8 -15 -1 2.44 0.8
 -8 -15 -1 1.75 0.35
 8 15 -1 2.71 0.48
 8 15 -1 2.5 0.36
 8 -15 1 3.53 0.82
 8 15 -1 2.27 0.39
 8 15 -1 2.84 0.37
 8 -15 1 1.53 0.88
 8 16 1 7.36 0.58
 8 16 1 7.77 0.66
 8 -16 -1 7.1 1.17
 8 -16 -1 5.94 1.85
 -8 -16 1 6.91 0.64
 8 16 1 6.67 0.77
 8 16 1 8.14 0.59
 -8 -16 1 6.54 1.63
 8 16 -1 7.72 0.58
 -8 -16 -1 6.86 1.66
 -8 -16 -1 6.56 0.64
 8 16 -1 7.19 0.64
 8 16 -1 7.02 0.74
 8 16 -1 6.71 0.57
 8 -16 1 6.7 1.08
 8 -16 1 3.6 1.34
 8 17 1 11.85 0.78
 -8 -17 1 11.56 2.03
 8 17 1 10.53 0.86
 8 -17 -1 10.37 2.2
 8 17 1 9.42 0.75
 8 -17 1 8.54 2.22
 -8 -17 -1 10.48 2.02
 8 17 -1 10.41 0.85
 8 17 -1 10.98 0.76
 8 -17 1 10.42 1.34
 8 17 -1 11.28 0.77
 -8 -18 1 8.24 1.83
 8 18 1 7.69 0.61
 8 18 1 8.35 0.63
 8 -18 -1 7.89 1.87
 8 18 1 7.47 0.7
 -8 -18 -1 8.3 1.78
 8 18 -1 7.82 0.63
 8 18 -1 8.46 0.62
 8 18 -1 8.12 0.71
 8 19 1 0.25 0.24
 8 -19 -1 -0.11 0.51
 8 19 1 0.11 0.19
 8 19 1 0.33 0.19
 -8 -19 1 0.12 0.51
 8 19 -1 0.51 0.2
 8 19 -1 0.2 0.23
 8 -19 1 -0.58 0.5
 8 19 -1 0.3 0.18
 -8 -19 -1 0.09 0.51
 8 20 1 2.05 0.32
 8 20 1 3.31 0.34
 -8 -20 1 1.31 0.61
 8 -20 -1 2.07 0.7
 8 -20 1 0.9 0.62
 -8 -20 -1 1.36 0.62
 8 20 -1 3.11 0.34
 8 20 -1 2.7 0.4
 8 20 -1 2.86 0.33
 8 21 1 9.49 0.67
 8 21 1 9.9 0.66
 8 -21 1 8.98 1.69
 8 21 -1 9.1 0.67
 8 21 -1 10.51 0.67
 8 22 1 8.26 0.61
 8 22 1 9.45 0.6
 8 22 -1 8.18 0.61
 8 22 -1 9.65 0.6
 8 23 1 0.1 0.13
 8 23 -1 0.03 0.12
 9 0 1 0.11 0.11
 9 0 -1 0.11 0.11
 9 -1 -1 0.42 0.13
 9 1 1 0.6 0.14
 9 -1 1 0.37 0.12
 9 1 -1 0.34 0.13
 9 -1 1 0.41 0.1
 9 -2 -1 66.2 4.48
 9 -2 -1 51.85 3.71
 9 2 1 57.66 3.58
 9 -2 1 52.84 3.71
 9 2 -1 58.88 3.58
 9 -2 1 66.52 4.49
 9 -3 -1 1.58 0.29
 9 -3 -1 1.36 0.2
 9 3 1 1.67 0.24
 9 -3 1 1.15 0.18
 9 3 -1 1.01 0.18
 9 -3 1 1.43 0.28
 9 -4 -1 0.21 0.22
 9 -4 -1 0.26 0.17
 9 4 1 0.31 0.15
 9 4 -1 0.11 0.12
 9 -4 1 0.3 0.15
 9 -4 1 0.09 0.2
 9 4 -1 0.42 0.15
 9 5 1 0.85 0.2
 9 -5 -1 0.94 0.3
 9 -5 1 0.56 0.19
 9 -5 1 0.58 0.26
 9 5 -1 0.56 0.19
 9 6 1 59.98 3.76
 9 -6 -1 61.34 4.43
 9 6 -1 57.08 3.74
 9 -6 1 53.39 4.39
 9 -6 1 51.62 3.63
 9 -7 -1 11.6 1.14
 9 7 1 11.12 0.89
 9 7 -1 10.76 0.88
 9 -7 1 11.15 1.11
 9 -7 1 10.55 0.84
 9 -8 -1 16.35 1.62
 9 8 1 17.77 1.31
 9 -8 -1 17.8 2.42
 9 8 -1 17.39 1.29
 9 -8 1 15.95 1.23
 9 -8 1 17.15 1.6
 9 -8 1 18.71 2.5
 9 9 1 1.13 0.31
 9 -9 -1 1.73 0.58
 9 9 1 1.97 0.4
 9 -9 -1 1.61 0.55
 9 -9 1 1.24 0.49
 9 9 -1 1.6 0.34
 9 -9 1 1.12 0.58
 9 -9 1 2.61 0.37
 9 10 1 27.36 2.1
 -9 10 -1 29.77 2.03
 9 -10 -1 24.89 2.59
 9 -10 -1 31.42 3.93
 9 -10 1 30.18 4.05
 9 -10 1 32.15 2.02
 9 -10 1 27.49 2.56
 9 10 -1 28.74 2.08
 9 11 1 11.58 1.06
 9 -11 -1 12.49 2.21
 9 -11 -1 11.89 1.44
 9 -11 -1 12.67 1.51
 -9 11 1 12.11 0.99
 9 -11 1 12.51 2.38
 9 -11 1 9.77 1.45
 9 -11 1 12.56 1.4
 9 11 -1 10.36 1
 9 -11 1 13.14 0.98
 -9 -12 1 1.48 0.31
 9 12 1 1.17 0.24
 9 12 1 2.14 0.48
 9 -12 -1 2.31 0.39
 9 -12 -1 1.4 0.68
 9 -12 -1 1.32 0.77
 -9 -12 -1 1.25 0.3
 9 12 -1 2.32 0.44
 9 12 -1 1.47 0.26
 9 -12 1 1.48 0.64
 9 -12 1 1.85 0.38
 -9 12 1 1.54 0.37
 9 -12 1 0.43 0.67
 9 13 1 5.03 0.53
 9 -13 -1 6.18 0.63
 9 -13 -1 3.59 1.11
 -9 -13 1 5.8 0.55
 9 13 1 5.44 0.48
 9 -13 -1 5.36 1.13
 9 13 1 6.46 0.72
 -9 -13 1 4.6 0.47
 9 13 1 5.04 0.46
 9 -13 1 2.16 1.1
 9 13 -1 4.51 0.46
 -9 13 1 5.88 0.64
 9 13 -1 5.04 0.47
 9 13 -1 5.88 0.65
 9 13 -1 5.41 0.55
 9 -13 1 5.07 1.02
 -9 -13 -1 6.52 0.55
 9 -13 1 6.16 0.62
 -9 -13 -1 5.35 0.49
 9 14 1 36.84 2.46
 9 -14 -1 35.95 5.01
 -9 -14 1 38.42 2.24
 9 14 1 36.05 2.65
 -9 -14 1 32.06 2.16
 9 -14 -1 42.88 2.6
 9 14 1 37.46 2.19
 9 -14 -1 38.91 3.37
 9 14 1 36.33 2.19
 -9 -14 -1 39.34 2.24
 9 -14 1 36.08 3.25
 9 14 -1 40.31 2.48
 -9 -14 -1 31.37 2.17
 9 14 -1 34.25 2.6
 9 14 -1 40.79 2.2
 9 -14 1 29.96 5.08
 9 -14 1 41.85 2.58
 9 14 -1 34.46 2.19
 9 -15 -1 1.3 0.75
 9 15 1 1.59 0.27
 9 15 1 1.43 0.3
 9 -15 -1 0.41 0.72
 -9 -15 1 0.95 0.33
 9 15 1 1.53 0.27
 9 15 1 0.99 0.41
 9 -15 1 0.39 0.75
 9 15 -1 1.25 0.26
 9 15 -1 1.43 0.4
 -9 -15 -1 1.8 0.35
 9 15 -1 1.03 0.25
 9 -15 1 0.74 0.63
 9 15 -1 1.3 0.3
 9 16 1 19.39 1.64
 -9 -16 1 20.62 1.38
 9 -16 -1 18.59 2.13
 9 16 1 20.55 1.32
 9 16 1 22.65 1.34
 9 -16 -1 21.57 3.35
 9 16 1 20.68 1.5
 9 16 -1 21.94 1.34
 9 16 -1 19.33 1.61
 9 16 -1 21.71 1.51
 9 -16 1 21.8 2.13
 9 -16 1 19.32 3.4
 -9 -16 -1 20.97 1.38
 -9 -16 -1 22.69 3.15
 9 16 -1 21.68 1.33
 9 17 1 1.24 0.26
 9 17 1 1.43 0.3
 9 17 1 2.42 0.35
 -9 -17 1 1.43 0.68
 9 -17 -1 0.87 0.72
 9 -17 1 0.86 0.77
 -9 -17 -1 1.9 0.35
 -9 -17 -1 0.59 0.59
 9 17 -1 1.51 0.31
 9 17 -1 1.56 0.26
 9 17 -1 2.48 0.35
 9 -18 -1 7.71 2.1
 9 18 1 11.06 0.78
 9 18 1 11.11 0.78
 -9 -18 1 13.16 2.13
 9 18 1 10.86 0.88
 9 18 -1 11.61 0.89
 9 18 -1 11.41 0.79
 -9 -18 -1 12.41 2.13
 9 18 -1 11.35 0.77
 9 -18 1 6.57 2.1
 9 -19 -1 1.62 0.76
 9 19 1 3.76 0.45
 9 19 1 3.89 0.38
 9 19 1 4.06 0.38
 -9 -19 1 4.62 1.37
 9 -19 1 1.75 0.8
 9 19 -1 3.75 0.38
 9 19 -1 3.45 0.37
 -9 -19 -1 1.68 0.74
 9 19 -1 3.48 0.44
 9 -20 -1 10.92 1.89
 9 20 1 11.09 0.73
 9 20 1 10.29 0.74
 -9 -20 1 12.1 2
 9 20 1 12.19 0.85
 9 20 -1 10.05 0.72
 9 -20 1 8.45 1.87
 9 20 -1 11.36 0.74
 9 20 -1 9.55 0.83
 9 21 1 0.46 0.16
 9 21 1 0.68 0.18
 9 21 -1 0.49 0.15
 9 21 -1 0.38 0.17
 9 22 1 5.31 0.44
 9 22 1 6.09 0.42
 9 22 -1 6.23 0.45
 9 22 -1 5.81 0.42
 10 -2 -1 46.74 3.58
 10 -2 1 46.48 3.59
 10 -3 -1 6.64 0.61
 10 -3 -1 4.91 0.45
 10 -3 1 5.51 0.45
 10 -3 1 6.55 0.62
 10 -4 -1 -0.09 0.2
 10 -4 -1 -0.02 0.15
 10 4 1 0.07 0.14
 10 -4 1 -0.14 0.13
 10 -4 1 -0.01 0.21
 10 -5 -1 0.75 0.21
 10 -5 -1 0.55 0.3
 10 5 1 0.66 0.2
 10 -5 1 0.26 0.18
 10 -5 1 0.86 0.29
 10 5 -1 0.74 0.2
 10 -6 -1 68.66 5.12
 10 -6 -1 60.99 4.23
 10 6 1 71.91 4.36
 10 -6 1 63.12 4.23
 10 -6 1 62.63 5.1
 10 6 -1 68.6 4.36
 10 -7 -1 7.03 1.2
 10 -7 -1 5.66 0.76
 10 -7 -1 5.06 0.53
 10 7 1 4.93 0.56
 10 -7 1 5.39 0.74
 10 -7 1 6.36 1.26
 10 -7 1 5.04 0.53
 10 7 -1 5.56 0.55
 10 8 1 5.66 0.59
 10 -8 -1 5.27 0.82
 10 -8 -1 4.19 0.53
 10 -8 -1 6.11 1.31
 10 8 1 4.74 0.52
 10 -8 1 5.01 0.54
 10 -8 1 6.41 1.39
 10 8 -1 5.13 0.56
 10 -8 1 4.93 0.77
 10 -9 -1 0.39 0.39
 10 -9 -1 -0.06 0.45
 10 9 1 0.48 0.3
 10 9 1 -0.22 0.24
 10 -9 -1 0.28 0.24
 10 -9 1 -0.02 0.21
 10 -9 1 0.18 0.4
 10 9 -1 0.21 0.26
 10 -9 1 0.1 0.4
 10 -10 -1 47.85 5.71
 10 -10 -1 49.44 3.02
 10 -10 -1 41.82 3.38
 10 -10 -1 41.76 3.79
 10 10 1 42.15 3.12
 10 10 -1 44.78 3.11
 10 -10 1 40.52 3.73
 10 -10 1 47.81 5.82
 10 -10 1 41.46 3.41
 10 -10 1 50.1 3.02
 10 -11 -1 0.13 0.25
 10 -11 -1 0.36 0.62
 10 -11 -1 -0.19 0.46
 10 -11 -1 -0.22 0.62
 -10 -11 1 0.16 0.24
 10 11 1 0.29 0.31
 10 11 -1 -0.26 0.27
 -10 11 1 0.16 0.28
 10 -11 1 0.21 0.25
 10 -11 1 -0.11 0.64
 10 -11 1 0.11 0.53
 -10 -11 -1 0.16 0.23
 10 -11 1 -0.03 0.54
 10 -12 -1 4.05 0.99
 10 12 1 4.49 0.66
 10 12 1 3.72 0.4
 10 12 1 4.67 0.41
 10 12 1 3.58 0.47
 -10 -12 1 4.2 0.49
 -10 -12 1 3.72 0.43
 10 -12 -1 2.31 0.93
 10 -12 -1 4.01 0.55
 10 12 -1 4.37 0.42
 10 -12 1 4.56 0.56
 -10 -12 -1 3.79 0.43
 10 12 -1 3.79 0.48
 -10 12 1 4.73 0.57
 -10 -12 -1 4.34 0.48
 10 12 -1 5.37 0.63
 10 -12 1 5.55 1.04
 10 -12 1 1.96 0.95
 10 12 -1 2.96 0.39
 -10 -13 1 0.88 0.31
 10 -13 -1 0.39 0.64
 10 13 1 0.84 0.22
 10 13 1 0.98 0.24
 10 13 1 1.01 0.26
 10 -13 -1 0.7 0.3
 10 13 1 0.6 0.4
 -10 -13 1 0.46 0.25
 10 -13 -1 1.01 0.76
 10 13 -1 0.73 0.26
 -10 -13 -1 1.05 0.29
 10 13 -1 0.44 0.36
 10 -13 1 0.11 0.69
 10 13 -1 0.92 0.21
 10 13 -1 0.82 0.23
 10 -13 1 0.36 0.66
 -10 -13 -1 0.39 0.26
 10 -13 1 0.79 0.31
 10 -14 -1 7.59 1.39
 10 14 1 8.51 0.96
 10 14 1 10.51 0.73
 -10 -14 1 9.17 0.71
 10 -14 -1 7.37 2.18
 -10 -14 1 9.37 0.78
 10 14 1 9.38 0.69
 10 14 1 11.1 0.83
 10 -14 1 10.97 1.42
 10 14 -1 9.85 0.71
 -10 -14 -1 8.32 0.7
 10 14 -1 9.25 0.93
 10 14 -1 9.69 0.81
 -10 -14 -1 10.19 0.78
 10 14 -1 11.1 0.73
 10 -15 -1 0.98 0.73
 10 -15 -1 -0.36 0.6
 10 15 1 0.58 0.22
 -10 -15 1 0.56 0.3
 10 15 1 0.6 0.22
 -10 -15 1 0.26 0.26
 10 15 1 -0.01 0.37
 10 15 1 0.42 0.24
 10 15 -1 0.33 0.21
 10 15 -1 0.7 0.23
 10 -15 1 -0.31 0.63
 10 15 -1 0.21 0.32
 -10 -15 -1 -0.15 0.26
 10 -15 1 -0.18 0.84
 10 15 -1 0.01 0.22
 -10 -15 -1 0.03 0.26
 10 16 1 5.24 0.47
 10 -16 -1 4.99 1.07
 10 16 1 4.33 0.67
 10 16 1 5.25 0.47
 10 16 1 4.43 0.51
 10 -16 -1 2.28 1.05
 -10 -16 1 4.32 0.55
 10 16 -1 4.67 0.45
 10 16 -1 4.62 0.53
 10 16 -1 5.14 0.46
 -10 -16 -1 4.68 0.55
 10 -16 1 3.34 0.92
 10 -16 1 1.75 1.04
 10 16 -1 3.84 0.6
 -10 -17 1 -0.14 0.28
 10 17 1 -0.02 0.23
 -10 -17 1 0.43 0.57
 10 -17 -1 -0.45 0.64
 10 17 1 0.62 0.22
 10 17 1 0.02 0.19
 -10 -17 -1 0.21 0.52
 10 -17 1 -0.61 0.62
 10 17 -1 0.39 0.21
 10 17 -1 0.11 0.24
 10 17 -1 -0.05 0.19
 -10 -17 -1 0.25 0.29
 -10 -18 1 10.36 1.92
 10 18 1 9.66 0.8
 10 -18 -1 7.27 1.95
 10 18 1 9.42 0.69
 10 18 1 9 0.69
 10 18 -1 10.28 0.79
 10 18 -1 9.2 0.69
 -10 -18 -1 10.56 1.95
 10 18 -1 8.74 0.68
 -10 -19 1 0.44 0.53
 10 -19 -1 -0.09 0.52
 10 19 1 0.61 0.19
 10 19 1 0.35 0.25
 10 19 1 0.34 0.18
 -10 -19 -1 1 0.58
 10 19 -1 0.39 0.18
 10 -19 1 -0.09 0.55
 10 19 -1 0.27 0.17
 10 19 -1 0.25 0.24
 10 20 1 4.84 0.52
 10 -20 -1 5.97 1.38
 -10 -20 1 4.64 1.37
 10 20 1 4.65 0.43
 10 20 1 5.16 0.42
 10 20 -1 5.15 0.42
 10 20 -1 5.21 0.52
 10 20 -1 4.17 0.42
 10 -20 1 4.23 1.37
 10 21 1 0.19 0.15
 10 21 -1 0.07 0.2
 10 21 -1 0.03 0.14
 10 21 -1 0.12 0.15
 10 22 1 7.25 0.52
 10 22 -1 8 0.53
 11 -3 -1 19.23 1.61
 11 -3 1 20.26 1.63
 11 -4 -1 0.41 0.23
 11 -4 1 0.21 0.15
 11 -4 1 0.28 0.23
 11 -5 -1 6.38 0.7
 11 5 1 5.05 0.53
 11 -5 -1 5.53 0.52
 11 5 1 6.92 0.54
 11 -5 1 6.25 0.7
 11 -5 1 5.28 0.5
 11 -6 -1 66.29 7.78
 11 -6 -1 63.28 4.26
 11 -6 -1 72.24 5.17
 11 6 1 57.38 4.47
 11 6 1 71.57 4.39
 11 6 -1 69.39 4.39
 11 -6 1 62.96 4.25
 11 -6 1 68.38 7.82
 11 -6 1 67.01 5.14
 11 7 1 2.59 0.39
 11 -7 -1 2.38 0.52
 11 -7 -1 1.67 0.32
 11 -7 -1 1.54 0.48
 11 7 1 1.22 0.29
 11 -7 1 1.67 0.5
 11 7 -1 1.91 0.34
 11 -7 1 1.44 0.3
 11 -7 1 2.17 0.48
 11 8 1 1.66 0.33
 11 -8 -1 1.86 0.56
 11 -8 -1 2.48 0.57
 11 -8 -1 1.88 0.36
 11 8 1 2.44 0.41
 11 -8 1 2.91 0.39
 11 -8 1 1.8 0.57
 11 8 -1 2.49 0.42
 11 -8 1 1.97 0.51
 11 -9 -1 5.34 0.56
 11 -9 -1 4.82 0.88
 11 -9 -1 3.73 0.94
 11 9 1 4.97 0.55
 11 -9 -1 4.84 0.95
 11 9 1 5.88 0.65
 11 -9 1 5.17 0.55
 11 -9 1 4.8 0.94
 11 -9 1 5.32 1.47
 11 9 -1 5.02 0.61
 11 -9 1 5.06 0.85
 11 -10 -1 45.05 2.81
 11 -10 -1 40.65 5.3
 11 -10 -1 39.46 3.55
 11 -10 -1 38.25 3.15
 11 10 1 40.3 2.91
 11 -10 1 40.99 3.5
 11 -10 1 43.1 5.44
 11 -10 1 38.09 3.19
 11 10 -1 40.51 2.89
 11 -10 1 45.11 2.8
 11 -11 -1 1.45 0.74
 -11 -11 1 1.09 0.3
 11 -11 -1 0.77 0.63
 11 11 1 0.96 0.43
 -11 -11 1 0.59 0.25
 11 -11 -1 1.93 0.72
 11 -11 -1 0.42 0.31
 11 11 1 1.76 0.3
 11 11 1 0.8 0.23
 11 -11 1 0.54 0.28
 11 -11 1 1.26 0.75
 -11 -11 -1 1.29 0.3
 11 11 -1 1.51 0.3
 11 11 -1 1.54 0.41
 11 11 -1 1.48 0.25
 11 -11 1 0.08 0.61
 -11 -11 -1 0.66 0.24
 -11 11 1 1.29 0.38
 11 -11 1 0.46 0.59
 11 12 1 14.55 1.06
 11 12 1 17.85 1.45
 11 -12 -1 15.66 1.9
 11 -12 -1 16.71 1.83
 11 -12 -1 19.73 1.34
 11 -12 -1 14.36 2.8
 11 12 1 16.22 1.07
 -11 -12 1 17.3 1.08
 11 12 1 16.15 1.22
 -11 -12 1 18.12 1.15
 11 -12 1 14.14 2.95
 11 12 -1 13.51 1.05
 11 -12 1 19.3 1.33
 -11 -12 -1 16.57 1.07
 11 12 -1 16.33 1.22
 -11 -12 -1 17.43 1.14
 11 -12 1 16.74 1.81
 11 12 -1 18.29 1.38
 11 12 -1 16.57 1.07
 11 13 1 17.74 1.52
 11 13 1 18.78 1.33
 -11 -13 1 20.91 1.25
 11 -13 -1 14.41 3.01
 -11 -13 1 17.42 1.16
 11 -13 -1 20.72 1.45
 11 13 1 16.12 1.15
 11 13 1 19.02 1.17
 11 -13 -1 17.52 2.05
 11 13 -1 16.83 1.45
 -11 -13 -1 16.71 1.16
 11 13 -1 16.24 1.15
 11 13 -1 18 1.32
 11 13 -1 20.29 1.18
 11 -13 1 20.35 1.42
 -11 -13 -1 20.81 1.24
 11 -13 1 16.67 1.93
 11 -13 1 12.68 3.13
 11 -14 -1 12.61 1.69
 11 14 1 11.51 0.87
 -11 -14 1 13.18 0.96
 -11 -14 1 12.37 0.89
 11 -14 -1 10.25 2.53
 11 14 1 15.38 1.04
 11 14 1 13.97 1.22
 11 14 1 13.87 0.89
 11 14 -1 11.32 0.87
 11 14 -1 12.97 0.89
 -11 -14 -1 11.59 0.87
 11 -14 1 9.51 2.67
 11 14 -1 13.32 1.02
 11 14 -1 12.89 1.14
 -11 -14 -1 14.38 0.96
 11 -14 1 12.96 1.6
 -11 -15 1 0.3 0.26
 11 15 1 0.81 0.41
 11 -15 -1 0.24 0.69
 11 15 1 0.59 0.23
 -11 -15 1 0.19 0.28
 11 15 1 0.45 0.24
 11 15 1 0.51 0.26
 11 -15 -1 -0.37 0.63
 11 15 -1 0.39 0.25
 11 15 -1 0.55 0.25
 11 15 -1 0.72 0.35
 11 -15 1 -0.53 0.7
 11 -15 1 0.17 0.65
 11 15 -1 0.16 0.22
 -11 -15 -1 -0.04 0.28
 -11 -15 -1 0.16 0.29
 11 16 1 16.88 1.08
 11 16 1 17.65 1.23
 11 -16 -1 13.55 2.86
 11 16 1 15.78 1.07
 -11 -16 1 17.51 1.16
 11 16 -1 16.48 1.08
 11 16 -1 16.76 1.08
 11 -16 1 10.35 2.94
 -11 -16 -1 15.55 1.14
 11 16 -1 17.2 1.24
 11 17 1 9.47 0.72
 -11 -17 1 11.55 2.02
 11 17 1 10.05 0.73
 -11 -17 1 7.35 0.77
 11 17 1 10.32 0.84
 11 17 -1 10.18 0.73
 -11 -17 -1 9.22 0.78
 11 17 -1 9.95 0.71
 -11 -17 -1 11.32 2.03
 11 17 -1 9.81 0.83
 -11 -18 1 10.06 1.91
 11 18 1 9.15 0.7
 11 18 1 10.34 0.69
 11 -18 -1 7.18 2.02
 11 18 1 10.9 0.82
 11 18 -1 9.9 0.69
 -11 -18 -1 7.83 0.75
 11 18 -1 8.94 0.69
 -11 -18 -1 9.69 1.92
 11 18 -1 10.89 0.82
 11 19 1 -0.06 0.22
 -11 -19 1 -0.04 0.52
 11 -19 -1 0.25 0.51
 11 19 1 0.19 0.17
 11 19 -1 -0.09 0.17
 11 19 -1 -0.15 0.22
 11 -19 1 -0.13 0.55
 11 19 -1 -0.07 0.16
 11 20 1 8.13 0.59
 11 20 1 8.25 0.7
 11 20 -1 7.51 0.58
 11 20 -1 9.14 0.7
 11 -20 1 7.61 1.58
 11 21 1 0.8 0.17
 11 21 1 0.88 0.23
 11 21 -1 0.85 0.17
 11 21 -1 1.26 0.24
 12 0 1 0.15 0.17
 12 1 1 9.34 0.71
 12 1 -1 8.5 0.7
 12 -2 -1 0.11 0.36
 12 2 1 0.66 0.2
 12 2 -1 0.7 0.2
 12 3 1 3.83 0.43
 12 -3 -1 4.3 0.53
 12 3 -1 4.3 0.43
 12 -4 -1 0.14 0.24
 12 4 1 -0.18 0.18
 12 4 -1 -0.08 0.19
 12 -4 1 -0.1 0.23
 12 -5 -1 40.44 3.02
 12 5 1 35.03 2.61
 12 -5 -1 37.72 4.55
 12 -5 1 37.2 4.56
 12 -5 1 39.69 3.02
 12 6 1 14.99 1.18
 12 -6 -1 16.77 1.46
 12 -6 -1 16.83 2.18
 12 -6 1 17.62 2.25
 12 6 -1 14.17 1.16
 12 -6 1 15.61 1.44
 12 -6 1 16.65 1.14
 12 -7 -1 6.73 1.34
 12 -7 -1 5.89 0.81
 12 7 1 6.99 0.63
 12 -7 -1 5.6 0.58
 12 7 1 5.27 0.57
 12 -7 1 5.84 0.79
 12 -7 1 5.94 0.57
 12 -7 1 6.77 1.44
 12 8 1 -0.06 0.25
 12 8 1 0.15 0.25
 12 -8 -1 0.79 0.48
 12 -8 -1 0.12 0.25
 12 -8 -1 0.41 0.46
 12 -8 -1 -0.03 0.37
 12 -8 1 -0.23 0.18
 12 -8 1 -0.13 0.38
 12 -8 1 0.09 0.39
 12 -8 1 0.07 0.47
 12 8 -1 0.11 0.25
 12 -9 -1 14.43 1.5
 12 9 1 15.02 1.21
 12 -9 -1 16.72 1.67
 12 -9 -1 16.72 1.23
 12 -9 -1 16.45 2.52
 12 9 1 17.61 1.32
 12 -9 1 15.43 1.19
 12 -9 1 15.4 2.57
 12 9 -1 16.44 1.27
 12 -9 1 13.62 1.5
 12 -9 1 15.17 1.61
 12 10 1 12.88 1.07
 12 -10 -1 13.01 1.48
 12 10 1 15.84 1.27
 12 -10 -1 15.21 1.65
 -12 -10 1 15.29 1
 12 -10 -1 14.45 2.47
 -12 -10 1 14.07 0.95
 12 -10 -1 16.9 1.17
 12 10 -1 12.06 0.92
 12 -10 1 13.76 1.5
 12 -10 1 13.99 1.6
 -12 -10 -1 13.73 0.94
 12 10 -1 11.18 1.06
 12 10 -1 15.71 1.22
 12 -10 1 13.9 2.5
 12 -10 1 16.22 1.14
 -12 -10 -1 15.69 1
 12 -11 -1 7.27 1.27
 12 11 1 7.52 0.87
 12 11 1 5.98 0.56
 12 -11 -1 4.63 1.25
 -12 -11 1 7.38 0.64
 12 -11 -1 8.03 0.75
 12 11 1 7.57 0.68
 12 -11 -1 6.97 1.21
 -12 -11 1 7.28 0.59
 12 -11 1 7.33 1.17
 -12 -11 -1 7.55 0.59
 12 -11 1 8.26 0.73
 12 11 -1 6.91 0.57
 -12 -11 -1 8.42 0.65
 12 11 -1 7.74 0.81
 12 -11 1 4.03 1.27
 12 11 -1 6.45 0.67
 12 -11 1 9.45 1.37
 12 -12 -1 0.48 0.77
 12 -12 -1 0.8 0.32
 -12 -12 1 0.65 0.27
 12 12 1 0.93 0.27
 12 -12 -1 -0.48 0.58
 12 -12 -1 1.9 0.78
 12 12 1 0.48 0.23
 12 12 1 1.67 0.54
 -12 -12 1 0.45 0.27
 12 -12 1 -0.09 0.68
 -12 -12 -1 0.37 0.25
 12 -12 1 -0.3 0.6
 12 12 -1 0.73 0.23
 12 12 -1 0.7 0.27
 -12 -12 -1 0.75 0.29
 12 12 -1 0.06 0.36
 12 -12 1 0.2 0.3
 -12 -13 1 1.08 0.32
 12 -13 -1 -0.32 0.67
 -12 -13 1 1.15 0.3
 12 13 1 1.05 0.25
 12 13 1 0.61 0.44
 12 -13 -1 0.56 0.83
 12 13 1 0.89 0.28
 12 13 -1 1.18 0.31
 12 13 -1 0.83 0.42
 -12 -13 -1 1.77 0.36
 -12 -13 -1 1.1 0.28
 12 13 -1 1.38 0.27
 12 -13 1 0.47 0.74
 12 -13 1 -0.83 0.74
 12 14 1 0.32 0.43
 12 -14 -1 1.16 0.86
 -12 -14 1 0.56 0.28
 12 -14 -1 -0.41 0.72
 12 14 1 0.85 0.25
 12 14 1 0.93 0.3
 -12 -14 1 1.37 0.34
 -12 -14 -1 0.31 0.26
 -12 -14 -1 0.7 0.3
 12 14 -1 0.94 0.43
 12 14 -1 0.53 0.24
 12 -14 1 0.47 0.75
 12 -14 1 -0.52 0.75
 12 14 -1 0.91 0.3
 12 15 1 0.33 0.26
 -12 -15 1 0.12 0.29
 -12 -15 1 -0.52 0.25
 12 15 1 0.48 0.22
 12 -15 -1 -0.73 0.62
 12 15 -1 0.21 0.26
 12 15 -1 -0.1 0.21
 -12 -15 -1 -0.07 0.27
 -12 -15 -1 0.29 0.3
 12 -15 1 -1.09 0.68
 12 16 1 6.78 0.63
 -12 -16 1 5.14 0.6
 12 -16 -1 2.65 1.17
 12 16 1 5.92 0.53
 12 16 -1 6.35 0.63
 12 16 -1 5.92 0.52
 -12 -16 -1 5.32 0.56
 -12 -16 -1 6.16 0.62
 -12 -17 1 1.26 0.66
 12 17 1 1.68 0.26
 -12 -17 1 1.16 0.33
 12 17 1 1.29 0.32
 12 -17 -1 -0.65 0.73
 12 17 -1 1.76 0.33
 -12 -17 -1 1.43 0.33
 12 -17 1 -0.93 0.87
 12 17 -1 1.43 0.25
 -12 -17 -1 0.91 0.63
 -12 -18 1 -0.01 0.49
 12 -18 -1 -0.24 0.62
 12 18 1 0.28 0.19
 -12 -18 1 -0.13 0.25
 12 18 1 0.09 0.24
 12 18 -1 0.29 0.25
 12 18 -1 -0.15 0.17
 12 -18 1 -0.56 0.61
 -12 -18 -1 -0.42 0.25
 -12 -18 -1 0.41 0.54
 12 -19 -1 0.78 0.51
 12 19 1 0.43 0.18
 12 19 1 0.39 0.24
 -12 -19 1 0.08 0.49
 12 -19 1 0.07 0.55
 12 19 -1 0.29 0.17
 12 19 -1 0.53 0.24
 12 20 1 1.39 0.26
 12 20 1 0.82 0.19
 12 20 -1 1.2 0.2
 12 20 -1 1.06 0.25
 12 21 1 1.24 0.25
 12 21 1 1.21 0.19
 12 21 -1 2 0.33
 12 21 -1 1.51 0.22
 13 0 -1 0.11 0.17
 13 0 1 -0.11 0.17
 13 1 1 17.73 1.26
 13 1 -1 16.27 1.25
 13 -1 1 17.96 1.27
 13 2 1 4.37 0.41
 13 -2 -1 2.16 0.69
 13 2 -1 3.28 0.39
 13 -2 1 2.8 0.67
 13 3 1 15.93 1.19
 13 -3 -1 17.41 2.39
 13 3 -1 14.63 1.18
 13 -3 1 18.86 2.35
 13 4 1 3.33 0.4
 13 -4 -1 4.32 1.28
 13 -4 -1 3.33 0.5
 13 -4 1 5.54 1.12
 13 4 -1 2.46 0.4
 13 5 1 9.89 0.81
 13 -5 -1 10.87 1.01
 13 -5 -1 10.58 1.58
 13 -5 1 11.9 1.68
 13 5 -1 8.76 0.8
 13 -5 1 9.59 1
 13 -6 -1 10.39 1.01
 13 -6 -1 10.3 1.65
 13 6 1 9.54 0.79
 13 -6 -1 8.54 1.01
 13 -6 1 8.62 1.6
 13 6 -1 9.29 0.79
 13 -6 1 10.17 1.01
 13 -7 -1 45.67 3.39
 13 7 1 39.62 2.83
 13 -7 -1 38.81 3.06
 13 -7 -1 40.57 5.05
 13 -7 1 41.95 5.1
 13 -7 1 42.87 3.35
 13 -7 1 37.95 3.06
 13 -8 -1 1.29 0.56
 13 -8 -1 1.56 0.55
 13 8 1 0.99 0.29
 13 -8 -1 0.39 0.45
 13 -8 1 1.56 0.53
 13 -8 1 1.41 0.56
 13 -8 1 0.29 0.47
 13 -9 -1 47.6 5.99
 13 9 1 39.69 3.14
 13 -9 -1 47.64 4.01
 -13 -9 1 52.55 2.87
 13 -9 -1 46.83 3.62
 13 9 1 57.47 3.4
 13 -9 1 51.45 3.22
 -13 -9 -1 52.23 2.86
 13 -9 1 49.81 6.1
 13 9 -1 39.79 3.15
 13 -9 1 44.1 3.61
 13 -9 1 51.37 4.02
 -13 -10 1 0.61 0.27
 13 10 1 0.64 0.27
 13 -10 -1 0.7 0.69
 13 -10 -1 0.88 0.33
 -13 -10 1 0.38 0.28
 13 -10 -1 0.11 0.61
 13 -10 -1 0.1 0.53
 13 10 1 1.05 0.43
 13 -10 1 0.51 0.29
 -13 -10 -1 0.28 0.25
 13 10 -1 0.66 0.28
 13 10 -1 0.37 0.36
 13 -10 1 -0.04 0.6
 13 -10 1 0.08 0.7
 -13 -10 -1 0.87 0.3
 13 -10 1 0.46 0.6
 13 11 1 21.01 1.53
 13 -11 -1 21.58 2.08
 -13 -11 1 23.01 1.35
 13 11 1 21.59 1.72
 13 -11 -1 24.17 1.63
 13 -11 -1 16.94 2.18
 13 -11 -1 15.66 3.25
 -13 -11 1 22.22 1.41
 13 11 -1 19.4 1.66
 13 -11 1 24.03 1.62
 13 -11 1 18.28 3.43
 13 -11 1 18.44 2.12
 -13 -11 -1 22.1 1.4
 13 -11 1 22.6 2.14
 13 11 -1 20.58 1.53
 -13 -11 -1 21.34 1.34
 13 -12 -1 1.08 0.81
 -13 -12 1 -0.14 0.25
 13 12 1 -0.35 0.2
 13 12 1 0.11 0.45
 13 12 1 -0.18 0.24
 13 -12 -1 0.33 0.87
 -13 -12 1 0.21 0.25
 -13 -12 -1 -0.2 0.24
 13 -12 1 -0.3 0.67
 13 12 -1 -0.03 0.23
 -13 -12 -1 0.13 0.28
 13 12 -1 -0.17 0.39
 13 -12 1 -1.2 0.68
 13 12 -1 0.01 0.25
 13 -13 -1 33.61 3.52
 13 13 1 38.66 2.56
 13 13 1 35.47 2.24
 13 13 1 35.36 2.79
 -13 -13 1 40.33 2.34
 -13 -13 1 40.13 2.28
 -13 -13 -1 40.87 2.34
 13 13 -1 34.6 2.73
 13 13 -1 35.87 2.25
 -13 -13 -1 39.46 2.27
 13 -13 1 36.28 3.45
 13 13 -1 38.72 2.58
 13 14 1 2.22 0.33
 13 14 1 3.46 0.47
 -13 -14 1 1.68 0.37
 13 14 1 1.48 0.54
 -13 -14 1 2.04 0.34
 13 -14 -1 1.47 0.96
 13 14 -1 2.06 0.38
 13 -14 1 2 0.92
 -13 -14 -1 1.9 0.39
 -13 -14 -1 1.53 0.32
 13 14 -1 1.54 0.52
 13 -14 1 -0.45 0.92
 13 14 -1 1.71 0.32
 -13 -15 1 2.17 0.36
 13 15 1 3.52 0.5
 -13 -15 1 2.61 0.43
 13 15 1 3 0.43
 -13 -15 -1 2.1 0.38
 -13 -15 -1 2.58 0.43
 13 15 -1 3.12 0.48
 13 15 -1 3.76 0.43
 -13 -16 1 -0.16 0.28
 13 16 1 -0.17 0.19
 13 16 1 0 0.25
 13 -16 -1 -1.17 0.68
 -13 -16 1 -0.42 0.27
 -13 -16 -1 -0.34 0.28
 -13 -16 -1 -0.59 0.26
 13 16 -1 0.11 0.2
 13 -16 1 -1.71 0.73
 13 16 -1 0.21 0.26
 13 -17 -1 21.47 3.78
 13 17 1 26.02 1.6
 -13 -17 1 24.25 1.66
 13 17 1 26.94 1.84
 -13 -17 1 31.28 3.78
 -13 -17 -1 27.94 3.71
 13 17 -1 29.06 1.85
 13 17 -1 25.42 1.6
 -13 -17 -1 24.76 1.66
 -13 -18 1 4.07 0.49
 -13 -18 1 5.13 1.43
 13 -18 -1 2.12 0.84
 13 18 1 5.48 0.52
 13 18 1 3.63 0.39
 13 -18 1 1.78 0.89
 13 18 -1 3.83 0.39
 13 18 -1 4.74 0.49
 -13 -18 -1 2.64 0.41
 13 19 1 0.09 0.15
 13 19 1 0.21 0.22
 13 -19 1 0.28 0.47
 13 19 -1 0.03 0.16
 13 19 -1 0.33 0.23
 13 20 1 1.22 0.2
 13 20 1 2.44 0.38
 13 20 -1 2.33 0.26
 13 20 -1 2.52 0.36
 14 0 1 0 0.19
 14 0 -1 0.14 0.18
 14 1 1 -0.07 0.18
 14 1 -1 0.23 0.2
 14 -1 1 0.26 0.2
 14 2 1 0.15 0.2
 14 2 -1 0.07 0.18
 14 -2 1 -0.4 0.56
 14 3 1 1.88 0.33
 14 -3 -1 1.61 0.64
 14 -3 1 1.45 0.59
 14 3 -1 1.47 0.28
 14 4 1 0.31 0.21
 14 -4 -1 -0.1 0.37
 14 -4 -1 0.4 0.49
 14 4 -1 0.14 0.2
 14 -4 1 0.08 0.43
 14 -5 -1 7.65 1.78
 14 5 1 7.65 0.69
 14 -5 -1 7.83 0.92
 14 -5 -1 8.83 0.87
 14 -5 1 8.84 0.96
 14 5 -1 6.84 0.68
 14 -5 1 7.86 1.77
 14 -6 -1 -0.14 0.39
 14 -6 -1 -0.18 0.32
 14 -6 -1 0.06 0.43
 14 6 1 -0.1 0.23
 14 6 -1 0.4 0.24
 14 -6 1 -0.29 0.35
 14 -6 1 -0.29 0.29
 14 -6 1 0.8 0.48
 14 -7 -1 1.65 0.51
 14 -7 -1 1.8 0.56
 14 7 1 1.11 0.31
 14 -7 -1 0.8 0.51
 14 -7 1 0.25 0.49
 14 -7 1 1.19 0.47
 14 -7 1 1.48 0.54
 14 -8 -1 0.76 0.52
 14 -8 -1 -0.04 0.47
 14 8 1 -0.01 0.26
 14 8 1 -0.02 0.23
 -14 -8 1 -0.29 0.24
 14 8 -1 0.29 0.29
 14 -8 1 -0.55 0.41
 14 -8 1 0.09 0.47
 14 -8 1 0.45 0.55
 -14 -8 -1 -0.44 0.21
 14 9 1 14.13 1.04
 -14 -9 1 13.02 0.88
 14 -9 -1 14.4 1.45
 14 9 1 12.31 0.99
 14 -9 -1 15 1.53
 14 -9 -1 7.8 2.23
 -14 -9 1 14.89 0.95
 14 9 -1 11.95 1.01
 14 -9 1 13.32 1.43
 14 -9 1 11.33 1.41
 14 -9 1 7.95 2.32
 -14 -9 -1 13.78 0.94
 -14 -9 -1 11.88 0.86
 -14 -10 1 2.76 0.42
 -14 -10 1 3.07 0.46
 14 -10 -1 3.01 0.91
 14 10 1 2.61 0.47
 14 -10 -1 2.56 0.78
 14 -10 1 2.73 0.84
 -14 -10 -1 2.66 0.42
 -14 -10 -1 2.56 0.39
 14 10 -1 2.29 0.42
 14 -10 1 3.01 0.84
 14 -11 -1 1.67 0.83
 14 11 1 1.11 0.32
 -14 -11 1 1 0.29
 14 -11 -1 -0.17 0.63
 14 -11 -1 1.31 0.9
 -14 -11 1 0.85 0.32
 14 -11 1 -1.05 0.67
 14 11 -1 0.97 0.32
 -14 -11 -1 1.38 0.29
 14 -11 1 1.24 0.84
 -14 -11 -1 1.68 0.33
 14 -11 1 1.13 0.74
 14 -12 -1 2.44 1.05
 -14 -12 1 3.71 0.52
 14 12 1 3.36 0.54
 14 -12 -1 4.23 0.99
 -14 -12 1 3.38 0.48
 14 -12 1 3.08 1
 -14 -12 -1 4.29 0.48
 14 12 -1 3.74 0.58
 -14 -12 -1 4.37 0.52
 -14 -13 1 4.28 0.5
 -14 -13 1 4.1 0.56
 14 13 1 3.92 0.57
 14 -13 -1 4.99 1.28
 -14 -13 -1 4.01 0.54
 -14 -13 -1 3.58 0.5
 14 13 -1 4.23 0.56
 14 -13 1 3.27 1.13
 -14 -14 1 0.17 0.31
 -14 -14 1 0.63 0.31
 14 14 1 1.05 0.33
 -14 -14 -1 0.66 0.32
 -14 -14 -1 -0.14 0.27
 14 14 -1 0.45 0.29
 14 15 1 2.55 0.4
 14 15 1 1.59 0.3
 -14 -15 1 1.39 0.37
 -14 -15 1 1.49 0.31
 14 15 -1 1.29 0.3
 -14 -15 -1 1.48 0.33
 -14 -15 -1 1.64 0.36
 14 15 -1 2.38 0.4
 14 16 1 -0.09 0.25
 14 16 1 0.06 0.21
 -14 -16 1 -0.06 0.27
 -14 -16 1 -0.37 0.26
 14 16 -1 0.04 0.2
 -14 -16 -1 0.01 0.27
 -14 -16 -1 -0.52 0.26
 14 16 -1 -0.15 0.26
 14 17 1 0.38 0.27
 14 17 1 0.39 0.2
 14 -17 -1 -0.9 0.58
 -14 -17 1 0.4 0.27
 14 17 -1 0.69 0.27
 -14 -17 -1 0.16 0.26
 -14 -17 -1 0.1 0.53
 14 17 -1 0.46 0.21
 14 18 1 0.57 0.26
 -14 -18 1 0.03 0.49
 14 -18 -1 1.14 0.59
 -14 -18 1 -0.18 0.24
 14 18 -1 0.14 0.18
 -14 -18 -1 -0.2 0.24
 14 -18 1 0.05 0.55
 14 18 -1 0.57 0.25
 14 19 1 0.36 0.21
 14 19 -1 0.45 0.22
 14 20 1 -0.13 0.18
 14 20 -1 0.22 0.18
 15 0 -1 -0.46 0.2
 15 0 -1 0.29 0.36
 15 0 1 -0.14 0.21
 15 1 1 21.32 1.61
 15 -1 -1 20.97 1.61
 15 -1 -1 25.43 1.8
 15 -1 1 24.42 1.8
 15 -1 1 21.88 1.62
 15 1 -1 24.67 1.79
 15 1 -1 20.57 1.6
 15 2 1 0.04 0.23
 15 -2 -1 0.8 0.42
 15 2 -1 -0.19 0.38
 15 2 -1 -0.25 0.22
 15 -2 1 0.44 0.39
 15 -2 1 -0.16 0.2
 15 -3 -1 20.29 3.2
 15 3 1 13.34 1.09
 15 -3 -1 15.19 1.32
 15 3 -1 14.9 1.29
 15 3 -1 12.43 1.09
 15 -3 1 15.42 1.33
 15 -3 1 20.72 3.04
 15 4 1 9.94 0.78
 15 -4 -1 12.96 2.66
 15 -4 -1 9.71 1.03
 15 4 -1 8.85 0.99
 15 -4 1 11.69 2.44
 15 -4 1 8.37 1.03
 15 4 -1 8.22 0.78
 15 -5 -1 99.29 6.7
 15 -5 -1 100.68 11.2
 15 5 1 92.13 6.39
 15 5 -1 84.53 6.37
 15 -5 1 96.72 11.19
 15 -5 1 96.93 6.7
 -15 -6 1 0.39 0.28
 15 -6 -1 0.59 0.66
 15 -6 -1 0.21 0.48
 15 6 1 0.56 0.26
 15 -6 1 0.6 0.64
 15 6 -1 0.76 0.27
 -15 -6 -1 0.65 0.26
 15 -6 1 1.09 0.51
 15 -7 -1 3.39 0.68
 15 -7 -1 2.39 0.83
 15 -7 -1 3.93 0.66
 15 7 1 3.26 0.46
 15 7 1 2.96 0.42
 -15 -7 1 3.06 0.46
 15 -7 1 4.05 0.69
 15 -7 1 1.96 0.8
 -15 -7 -1 2.33 0.39
 15 -7 1 3.49 0.71
 15 7 -1 1.43 0.36
 15 -8 -1 -0.42 0.57
 15 -8 -1 0.61 0.54
 15 -8 -1 0.9 0.54
 -15 -8 1 0.1 0.25
 15 8 1 0.13 0.28
 -15 -8 1 0.12 0.25
 15 8 1 0.23 0.27
 15 8 -1 0.36 0.26
 -15 -8 -1 0.15 0.26
 15 -8 1 0.1 0.47
 15 -8 1 0.2 0.6
 -15 -8 -1 0.43 0.26
 15 -9 -1 45.78 6.32
 15 -9 -1 50.98 3.79
 -15 -9 1 54.27 2.98
 15 9 1 45.94 3.28
 -15 -9 1 51.68 2.93
 15 -9 -1 46.57 4.16
 15 -9 1 52.22 3.81
 15 -9 1 49.57 4.16
 -15 -9 -1 55.58 2.98
 15 -9 1 47.51 6.41
 15 9 -1 44.84 3.28
 -15 -9 -1 49.19 2.92
 15 -10 -1 12.33 1.4
 -15 -10 1 11.19 0.83
 -15 -10 1 10.7 0.75
 15 10 1 9.66 0.87
 15 -10 -1 7.61 1.36
 15 -10 1 6.15 1.63
 15 10 -1 9.01 0.86
 15 -10 1 9.07 1.36
 -15 -10 -1 10.11 0.75
 15 -10 1 10.81 1.45
 -15 -10 -1 10.49 0.81
 -15 -11 1 0.72 0.3
 -15 -11 1 0.82 0.31
 15 -11 -1 1.36 0.88
 15 -11 -1 0.69 0.79
 15 11 1 0.75 0.32
 15 -11 1 0.99 0.81
 15 11 -1 0.35 0.29
 15 -11 1 1.17 0.8
 -15 -11 -1 0.37 0.29
 -15 -11 -1 0.62 0.29
 15 -12 -1 1.22 0.95
 15 -12 -1 0.87 0.83
 -15 -12 1 1.29 0.32
 -15 -12 1 0.93 0.33
 15 12 1 1.94 0.41
 15 -12 1 0.85 0.88
 -15 -12 -1 1.33 0.34
 -15 -12 -1 1.3 0.31
 15 12 -1 1.49 0.37
 -15 -13 1 8.65 0.69
 -15 -13 1 8.04 0.75
 15 13 1 8.09 0.79
 -15 -13 -1 8.21 0.75
 -15 -13 -1 8.11 0.69
 15 13 -1 6.77 0.77
 -15 -14 1 0.99 0.35
 15 14 1 0.82 0.33
 -15 -14 1 0.75 0.31
 15 14 -1 1.16 0.35
 -15 -14 -1 0.19 0.29
 -15 -14 -1 1.19 0.36
 15 15 1 1.55 0.36
 -15 -15 1 0.77 0.29
 -15 -15 1 0.79 0.32
 -15 -15 -1 0.67 0.32
 15 15 -1 1.28 0.35
 -15 -15 -1 0.93 0.31
 -15 -16 1 0.24 0.27
 15 16 1 0.59 0.29
 -15 -16 1 -0.2 0.26
 -15 -16 -1 -0.2 0.27
 15 16 -1 0.24 0.27
 -15 -16 -1 -0.04 0.27
 -15 -17 1 20.06 1.42
 15 17 1 25.44 1.6
 15 -17 -1 20.47 3.45
 -15 -17 1 25.76 3.26
 15 17 -1 25.32 1.59
 15 -17 1 14.35 3.49
 -15 -17 -1 20.23 1.42
 15 18 1 5.92 0.57
 -15 -18 1 4.92 0.52
 15 18 -1 6.58 0.58
 -15 -18 -1 4.53 0.52
 15 19 1 0.5 0.21
 15 19 -1 0.82 0.23
 15 20 1 0.77 0.2
 15 20 -1 0.14 0.18
 16 0 -1 -0.16 0.2
 16 0 1 -0.02 0.21
 16 0 -1 0.17 0.37
 16 0 1 0.18 0.39
 16 1 1 2.81 0.51
 16 -1 -1 2.5 0.4
 16 1 1 2.73 0.4
 16 -1 -1 2.96 0.5
 16 -1 1 1.94 0.36
 16 1 -1 2.88 0.49
 16 1 -1 2.35 0.37
 16 -1 1 2.78 0.5
 16 -2 -1 0.08 0.22
 16 -2 -1 0.71 0.44
 16 2 1 0.24 0.23
 16 2 -1 0.3 0.41
 16 -2 1 0.28 0.23
 16 -2 1 0.21 0.41
 16 2 -1 0.65 0.25
 16 -3 -1 0.06 0.4
 16 3 1 0.1 0.22
 16 3 -1 0.04 0.22
 16 -3 1 0.11 0.24
 16 3 -1 0.03 0.4
 16 -3 1 -0.53 0.4
 16 4 1 1.68 0.32
 16 -4 -1 2.21 0.49
 16 4 -1 2.24 0.4
 16 4 -1 1.69 0.49
 16 -4 1 2.23 0.54
 16 -4 1 1.75 0.94
 16 -5 -1 2.07 0.55
 16 -5 -1 9.89 2.96
 16 5 1 2.3 0.42
 16 5 -1 1.34 0.32
 16 -5 1 1.8 0.58
 16 -5 1 1.6 0.94
 16 -6 -1 -0.14 0.46
 16 6 1 0.19 0.26
 16 -6 -1 -0.12 0.86
 16 6 1 -0.22 0.24
 -16 -6 1 -0.22 0.26
 -16 -6 -1 -0.22 0.23
 16 -6 1 0.2 0.52
 16 6 -1 -0.23 0.24
 16 -6 1 0.18 0.83
 16 7 1 -0.33 0.26
 -16 -7 1 0.23 0.26
 16 -7 -1 0.1 0.5
 16 7 1 -0.17 0.27
 16 -7 -1 -0.05 0.88
 16 7 -1 0.3 0.27
 -16 -7 -1 0.3 0.27
 16 -7 1 0.22 0.88
 16 -7 1 -0.35 0.52
 -16 -8 1 -0.21 0.25
 16 8 1 0.61 0.3
 16 -8 -1 -0.64 0.87
 -16 -8 1 0.32 0.26
 16 8 1 -0.3 0.28
 16 -8 -1 0.22 0.54
 -16 -8 -1 0.18 0.26
 -16 -8 -1 0.23 0.26
 16 -8 1 0.14 0.59
 16 -8 1 -0.77 0.88
 16 8 -1 0.34 0.3
 16 -9 -1 -1.16 1
 16 -9 -1 0.52 0.66
 -16 -9 1 0.52 0.28
 16 -9 -1 -0.06 0.62
 16 9 1 0.86 0.33
 -16 -9 1 0.78 0.29
 16 -9 1 0.76 0.68
 -16 -9 -1 1.09 0.31
 -16 -9 -1 0.72 0.27
 16 -9 1 1.22 0.68
 16 9 -1 0.74 0.34
 16 -9 1 -0.87 0.97
 16 -10 -1 1.19 0.72
 -16 -10 1 0.74 0.31
 16 -10 -1 0.98 0.82
 -16 -10 1 0.95 0.29
 16 10 1 1.07 0.33
 16 -10 -1 -1.88 0.98
 -16 -10 -1 0.57 0.29
 16 -10 1 1.09 0.75
 16 -10 1 0.76 0.76
 -16 -10 -1 0.71 0.28
 16 10 -1 0.66 0.33
 16 11 1 -0.4 0.28
 16 -11 -1 0.17 0.85
 16 -11 -1 -0.48 0.76
 -16 -11 1 -0.06 0.28
 -16 -11 1 -0.17 0.25
 16 11 -1 0.06 0.31
 -16 -11 -1 -0.16 0.25
 -16 -11 -1 -0.19 0.25
 16 -11 1 0.61 0.78
 16 -11 1 -0.2 0.7
 16 12 1 0.29 0.31
 16 -12 -1 1 0.82
 -16 -12 1 0.62 0.29
 -16 -12 1 0.52 0.31
 -16 -12 -1 0.34 0.27
 -16 -12 -1 -0.11 0.27
 16 12 -1 0 0.31
 -16 -13 1 0.1 0.28
 16 13 1 0.08 0.32
 -16 -13 1 -0.3 0.26
 16 13 -1 0.1 0.31
 -16 -13 -1 0.14 0.28
 -16 -13 -1 0.32 0.28
 -16 -14 1 0.1 0.29
 16 14 1 0.14 0.31
 -16 -14 1 0.07 0.27
 16 14 -1 -0.12 0.3
 -16 -14 -1 -0.39 0.26
 -16 -14 -1 0.22 0.28
 -16 -15 1 1.81 0.36
 -16 -15 1 1.97 0.31
 -16 -15 -1 1.59 0.32
 -16 -15 -1 1.6 0.36
 16 15 -1 1.84 0.38
 -16 -16 1 0.11 0.24
 -16 -16 1 -0.13 0.25
 16 16 1 0.37 0.28
 16 -16 -1 -1.65 0.93
 -16 -16 -1 -0.3 0.25
 16 16 -1 0.12 0.27
 -16 -16 -1 0.33 0.26
 -16 -17 1 0.46 0.25
 16 17 1 1 0.27
 16 -17 1 -1.02 0.87
 16 17 -1 1.26 0.3
 -16 -17 -1 1 0.27
 -16 -18 1 -0.25 0.21
 16 18 1 0.01 0.2
 16 18 -1 0.03 0.21
 -16 -18 -1 -0.13 0.21
 16 19 1 0.07 0.19
 16 19 -1 0.2 0.19
 17 0 -1 -0.21 0.22
 17 0 1 -0.19 0.41
 17 0 1 -0.07 0.24
 17 0 -1 0.03 0.4
 17 1 1 10.71 1.13
 17 -1 -1 11.65 1.16
 17 -1 -1 10.4 0.93
 17 1 1 11 0.92
 17 -1 1 10.85 0.93
 17 -1 1 11.77 1.17
 17 1 -1 11.85 1.15
 17 1 -1 11.15 0.93
 17 -2 -1 60 4.34
 17 -2 -1 70.23 4.61
 17 2 1 59.8 4.33
 17 2 -1 57.1 4.32
 17 -2 1 67.96 4.6
 17 -2 1 65.4 4.36
 17 2 -1 66.33 4.57
 17 3 1 4.01 0.51
 17 -3 -1 4.28 0.56
 17 -3 -1 3.78 0.65
 17 3 -1 3.6 0.49
 17 3 -1 4.26 0.82
 17 -3 1 4.76 0.55
 17 -3 1 5.02 0.84
 17 4 1 1.69 0.33
 17 -4 -1 2.72 0.56
 17 4 -1 1.59 0.35
 17 4 -1 2.15 0.53
 17 -4 1 1.87 0.58
 17 -4 1 1.72 0.36
 17 5 1 3.57 0.49
 17 -5 -1 2.92 0.62
 17 5 -1 3.21 0.47
 17 -5 1 3.84 0.56
 17 -5 1 2.77 0.63
 17 6 1 18.68 1.43
 17 -6 -1 22.45 1.77
 17 6 -1 17.19 1.41
 17 -6 1 19.9 1.74
 17 7 1 0.38 0.31
 17 -7 -1 1.49 1.31
 17 7 1 0.26 0.27
 17 -7 -1 0 0.52
 -17 -7 1 -0.32 0.26
 17 7 -1 -0.39 0.3
 -17 -7 -1 -0.09 0.28
 17 -7 1 0.61 1.24
 17 -7 1 -0.19 0.58
 17 8 1 4.59 0.68
 -17 -8 1 6.13 0.57
 17 -8 -1 5.58 1.73
 -17 -8 1 6.31 0.63
 17 8 1 6.62 0.66
 17 -8 -1 5.7 0.94
 17 8 -1 5.2 0.7
 17 -8 1 6.89 1.21
 17 -8 1 5.74 1.7
 -17 -8 -1 5.25 0.56
 -17 -8 -1 5.18 0.6
 17 -9 -1 5.53 1.74
 -17 -9 1 5.81 0.65
 -17 -9 1 6.95 0.61
 17 -9 -1 6.53 1.24
 17 9 1 6.52 0.74
 17 -9 1 6.27 1.79
 -17 -9 -1 6.91 0.66
 17 -9 1 6.73 1.08
 17 9 -1 6.73 0.76
 -17 -9 -1 6.17 0.6
 -17 -10 1 4.72 0.6
 17 10 1 4.59 0.69
 17 -10 -1 4.4 1.79
 -17 -10 1 5.37 0.57
 17 -10 -1 5.15 0.98
 17 -10 1 5.66 1.04
 -17 -10 -1 6.2 0.63
 -17 -10 -1 6.52 0.58
 17 10 -1 4.99 0.7
 17 -10 1 4.3 1.92
 17 -11 -1 1.27 1.77
 17 -11 -1 4.11 0.99
 17 11 1 4.99 0.66
 -17 -11 1 4.37 0.52
 -17 -11 1 4.3 0.56
 -17 -11 -1 4.58 0.57
 -17 -11 -1 5.14 0.52
 17 -11 1 1.26 1.92
 17 11 -1 3.65 0.65
 17 -11 1 5.48 1.04
 -17 -12 1 11.23 0.85
 17 12 1 10.76 1.01
 -17 -12 1 11.87 0.91
 -17 -12 -1 11.95 0.86
 -17 -12 -1 12.65 0.92
 17 12 -1 9.67 0.99
 -17 -13 1 23.81 1.58
 -17 -13 1 24.02 1.51
 17 13 1 23.24 1.75
 -17 -13 -1 24.96 1.52
 17 13 -1 22.94 1.75
 -17 -13 -1 24.25 1.57
 -17 -14 1 6.33 0.59
 17 14 1 7.7 0.72
 -17 -14 1 5.86 0.64
 -17 -14 -1 5.75 0.63
 -17 -14 -1 5.13 0.57
 17 14 -1 7.15 0.71
 17 15 1 0.9 0.32
 -17 -15 1 0.93 0.28
 17 -15 -1 -0.51 1.31
 -17 -15 1 0.78 0.3
 17 -15 1 -1.96 1.43
 -17 -15 -1 0.25 0.28
 -17 -15 -1 0.49 0.28
 17 15 -1 1.05 0.34
 17 16 1 3.41 0.48
 17 -16 -1 0.72 1.36
 -17 -16 1 2.32 0.33
 -17 -16 1 3.01 0.46
 -17 -16 -1 2.8 0.39
 -17 -16 -1 2.79 0.42
 17 -16 1 0.72 1.34
 17 16 -1 4.56 0.51
 17 17 1 15.45 1.03
 -17 -17 1 11 0.89
 -17 -17 -1 11.48 0.9
 17 17 -1 14.78 1.01
 17 18 1 9.67 0.73
 -17 -18 1 6.54 0.63
 17 18 -1 10.51 0.74
 18 0 -1 -0.33 0.43
 18 0 1 -0.16 0.24
 18 0 -1 0.29 0.25
 18 0 1 0.17 0.44
 18 1 1 -0.13 0.24
 18 1 1 0.13 0.46
 18 -1 -1 -0.09 0.42
 18 -1 -1 0.13 0.25
 18 -1 1 -0.19 0.24
 18 1 -1 0.14 0.24
 18 -1 1 0.14 0.47
 18 1 -1 0.45 0.47
 18 2 1 3.37 0.48
 18 -2 -1 3.32 0.53
 18 -2 -1 4.24 0.66
 18 2 -1 3.7 0.65
 18 -2 1 3.51 0.62
 18 2 -1 3.68 0.49
 18 -2 1 3.33 0.51
 18 -3 -1 0.98 0.3
 18 3 1 0.35 0.26
 18 -3 -1 0.96 0.51
 18 -3 1 0.87 0.51
 18 3 -1 1.01 0.28
 18 -3 1 0.53 0.29
 18 3 -1 0.78 0.48
 18 4 1 0.55 0.28
 18 -4 -1 0.31 0.49
 18 -4 -1 0.13 0.28
 18 -4 1 0.05 0.5
 18 4 -1 0.2 0.25
 18 -4 1 0.24 0.29
 18 -5 -1 4.49 0.8
 18 5 1 5 0.57
 18 -5 -1 5.19 0.68
 18 -5 1 5.05 0.98
 18 5 -1 5.29 0.58
 18 -5 1 4.08 0.63
 18 6 1 4.99 0.63
 18 -6 -1 6.23 1.06
 18 -6 1 7.76 1.14
 18 6 -1 5.93 0.62
 18 -6 1 6.04 0.73
 18 -7 -1 0.77 0.59
 18 7 1 1.27 0.36
 -18 -7 1 1.15 0.32
 18 7 1 1.01 0.32
 18 -7 1 0.76 0.38
 -18 -7 -1 0.78 0.29
 18 -7 1 2.06 0.7
 18 8 1 0.81 0.35
 18 -8 -1 1.31 0.65
 -18 -8 1 0.78 0.3
 -18 -8 1 0.66 0.31
 18 -8 1 0.21 0.67
 18 8 -1 0.75 0.39
 -18 -8 -1 0.55 0.3
 18 -8 1 3.89 1.92
 -18 -8 -1 0.49 0.28
 -18 -9 1 0.03 0.26
 18 -9 -1 -0.01 0.62
 -18 -9 1 0.12 0.28
 18 -9 -1 4.43 2.08
 18 9 1 -0.04 0.34
 18 -9 1 0.37 0.68
 -18 -9 -1 0.15 0.27
 18 9 -1 0.12 0.37
 -18 -9 -1 0.58 0.27
 18 -9 1 4 2.02
 18 -10 -1 4.18 2.17
 -18 -10 1 0.66 0.3
 -18 -10 1 0.25 0.28
 18 10 1 0.86 0.39
 18 -10 -1 0.85 0.77
 -18 -10 -1 0.6 0.29
 -18 -10 -1 1.18 0.32
 18 -10 1 0.74 0.76
 18 10 -1 0.5 0.4
 18 -10 1 4.51 2.26
 18 11 1 0.07 0.35
 18 -11 -1 2.74 2.31
 -18 -11 1 -0.38 0.25
 -18 -11 1 0.08 0.28
 18 -11 -1 0.05 0.74
 18 11 -1 0.14 0.38
 -18 -11 -1 -0.01 0.28
 -18 -11 -1 0.16 0.27
 18 -11 1 -0.43 2.33
 18 12 1 -0.15 0.32
 18 -12 -1 2.41 2.55
 -18 -12 1 0.12 0.26
 -18 -12 1 0.27 0.28
 18 -12 1 -3.92 2.61
 -18 -12 -1 0.66 0.28
 -18 -12 -1 -0.13 0.26
 18 12 -1 0.33 0.37
 18 13 1 0.1 0.31
 -18 -13 1 0.37 0.27
 -18 -13 1 0.01 0.26
 18 -13 -1 -2.17 1.78
 -18 -13 -1 -0.11 0.25
 -18 -13 -1 -0.19 0.24
 18 -13 1 -1.31 1.96
 18 13 -1 0.38 0.35
 -18 -14 1 1.44 0.3
 18 14 1 1.69 0.38
 -18 -14 1 0.81 0.31
 18 -14 -1 1.28 1.84
 -18 -14 -1 1.36 0.3
 18 -14 1 -0.63 1.82
 18 14 -1 1.23 0.37
 -18 -14 -1 0.67 0.29
 18 -15 -1 -0.08 1.68
 -18 -15 1 -0.34 0.24
 -18 -15 1 -0.18 0.23
 18 15 1 0.18 0.28
 -18 -15 -1 0.02 0.24
 18 -15 1 -1.02 1.66
 -18 -15 -1 -0.01 0.24
 18 15 -1 0.2 0.27
 -18 -16 1 -0.02 0.21
 -18 -16 1 0.15 0.22
 18 16 1 0.37 0.27
 18 16 -1 0.24 0.24
 -18 -16 -1 0.1 0.22
 -18 -16 -1 -0.12 0.21
 18 17 1 0.05 0.2
 -18 -17 1 0.11 0.2
 18 17 -1 -0.14 0.2
 -18 -17 -1 -0.24 0.19
 19 0 -1 0.5 0.51
 19 0 1 -0.06 0.25
 19 0 -1 0.28 0.27
 19 0 1 0.24 0.47
 19 1 1 1.37 0.33
 19 -1 -1 1.09 0.33
 19 -1 -1 2.3 0.57
 19 1 1 2.06 0.56
 19 1 -1 1.58 0.33
 19 1 -1 1.78 0.57
 19 -1 1 0.7 0.3
 19 -1 1 1.79 0.59
 19 -2 -1 37.72 2.71
 19 -2 -1 39.27 2.95
 19 2 1 35.72 2.68
 19 -2 1 42.92 2.96
 19 -2 1 40.64 2.72
 19 2 -1 33.7 2.66
 19 2 -1 39.92 2.93
 19 -3 -1 4.66 0.61
 19 3 1 3.63 0.55
 19 -3 -1 3.44 0.69
 19 3 -1 3.98 0.69
 19 -3 1 5.1 0.6
 19 -3 1 4.37 0.74
 19 3 -1 3.92 0.53
 19 -4 -1 5.3 0.67
 19 -4 -1 3.63 0.75
 19 4 1 4.15 0.55
 19 -4 1 5.73 0.64
 19 4 -1 3.1 0.53
 19 -4 1 4.35 0.76
 19 5 1 0.41 0.29
 19 -5 -1 0.83 0.56
 19 -5 -1 1.88 0.39
 19 -5 1 0.73 0.36
 19 -5 1 0.99 0.61
 19 5 -1 0.98 0.31
 19 -6 -1 27.96 2.37
 19 6 1 25.8 2.03
 19 -6 1 28.23 2.38
 19 -6 1 31.45 2.14
 19 7 1 0.6 0.3
 19 -7 -1 0.53 0.38
 -19 -7 1 -0.04 0.28
 19 -7 -1 0.63 0.64
 -19 -7 -1 0.73 0.3
 19 -7 1 0.71 0.64
 19 -7 1 0.55 0.35
 19 -8 -1 1.31 0.69
 19 8 1 0.54 0.4
 -19 -8 1 0.56 0.31
 -19 -8 1 0.46 0.27
 19 -8 1 0.33 0.36
 -19 -8 -1 0.47 0.28
 19 -8 1 1.13 0.72
 -19 -8 -1 0.44 0.31
 -19 -9 1 -0.03 0.27
 -19 -9 1 -0.2 0.26
 19 9 1 0.41 0.39
 19 -9 -1 -0.69 0.61
 -19 -9 -1 0.32 0.26
 19 -9 1 0.17 0.7
 19 -9 1 -0.07 0.35
 -19 -9 -1 0.14 0.27
 19 9 -1 -0.04 0.39
 19 -10 -1 25.56 2.29
 -19 -10 1 24.91 1.6
 19 10 1 22.61 1.81
 -19 -10 1 24.43 1.54
 19 10 -1 22.37 1.81
 -19 -10 -1 24.06 1.58
 19 -10 1 25.35 2.34
 -19 -10 -1 26.25 1.55
 19 -11 1 30.32 7.8
 -19 -12 1 2.31 0.37
 -19 -12 1 1.32 0.31
 19 12 1 1.49 0.43
 -19 -12 -1 1.72 0.33
 19 12 -1 0.8 0.41
 19 -12 1 3.48 2.6
 -19 -12 -1 1.6 0.34
 19 -12 1 1.72 0.42
 -19 -13 1 -0.17 0.26
 19 13 1 -0.24 0.32
 -19 -13 1 -0.77 0.23
 19 -13 -1 2.46 2.29
 19 -13 1 -0.36 0.3
 -19 -13 -1 -0.39 0.24
 -19 -13 -1 -0.25 0.25
 19 -13 1 2.83 2.5
 19 13 -1 0.21 0.34
 -19 -14 1 14 1.05
 -19 -14 1 15.55 1.01
 19 -14 -1 20.13 6.07
 19 14 1 17.08 1.22
 -19 -14 -1 12.29 1.03
 19 14 -1 17.44 1.22
 -19 -14 -1 15.42 1.02
 19 -14 1 14.15 4.3
 19 15 1 -0.21 0.24
 -19 -15 1 -0.06 0.21
 -19 -15 1 0.09 0.22
 -19 -15 -1 -0.02 0.23
 19 15 -1 0.53 0.29
 -19 -15 -1 -0.08 0.2
 -19 -16 1 4.65 0.5
 19 16 1 6.5 0.59
 19 16 -1 7.24 0.6
 -19 -16 -1 5.19 0.47
 -19 -16 -1 4.72 0.5
 19 17 1 -0.04 0.2
 19 17 -1 0.04 0.19
 20 0 1 0.23 0.49
 20 0 1 -0.34 0.26
 20 0 -1 0.06 0.26
 20 0 -1 0.23 0.52
 20 1 1 0.61 0.29
 20 -1 -1 0.09 0.5
 20 -1 1 0.4 0.3
 20 1 -1 0.4 0.27
 20 1 -1 0.1 0.5
 20 -1 1 0.48 0.51
 20 2 1 1.04 0.31
 20 -2 -1 1.32 0.37
 20 -2 -1 2.17 0.6
 20 -2 1 0.92 0.35
 20 2 -1 1.94 0.63
 20 2 -1 1.05 0.32
 20 -2 1 1.67 0.62
 20 -3 -1 1.65 0.38
 20 -3 -1 2.15 0.61
 20 3 1 1.19 0.34
 20 -3 1 1.87 0.62
 20 -3 1 1.72 0.4
 20 3 -1 1.01 0.32
 20 4 1 -0.07 0.27
 20 -4 -1 0.29 0.53
 20 -4 -1 0.06 0.32
 20 -4 1 0.23 0.31
 20 4 -1 -0.01 0.26
 20 -4 1 -0.13 0.53
 20 5 1 0.44 0.28
 20 -5 -1 0.24 0.57
 20 -5 -1 0.37 0.38
 20 -5 1 0.01 0.33
 20 5 -1 0.34 0.28
 20 -5 1 0.1 0.56
 20 -6 -1 6.29 1.16
 20 6 1 6.78 0.72
 20 -6 -1 8.58 0.88
 20 -6 1 8.48 0.85
 20 -6 1 5.92 1.18
 20 -7 -1 0.66 0.62
 20 7 1 0.36 0.3
 20 -7 -1 0.51 0.39
 -20 -7 1 0.13 0.28
 20 -7 1 0.23 0.63
 20 -7 1 0.67 0.39
 20 -8 -1 -0.42 0.6
 -20 -8 1 1.04 0.32
 -20 -8 1 0.65 0.28
 20 -8 -1 0.96 0.44
 20 -8 1 1.15 0.7
 -20 -8 -1 0.88 0.31
 -20 -8 -1 0.93 0.29
 20 -8 1 1.44 0.46
 20 9 1 1.14 0.43
 20 -9 -1 2.6 0.56
 20 -9 -1 2.16 0.78
 -20 -9 1 1.44 0.34
 -20 -9 1 1.45 0.3
 20 -9 1 2.03 0.8
 -20 -9 -1 1.26 0.29
 -20 -9 -1 1.72 0.34
 20 -9 1 1.63 0.45
 -20 -10 1 2.53 0.4
 20 -10 -1 4.44 0.72
 -20 -10 1 2.72 0.43
 20 -10 -1 3.34 0.86
 20 10 1 2.54 0.49
 20 -10 1 3.5 0.64
 -20 -10 -1 3.37 0.48
 -20 -10 -1 2.22 0.35
 20 10 -1 2.09 0.53
 20 -11 -1 0.47 0.41
 -20 -11 1 -0.07 0.24
 -20 -11 1 0.1 0.25
 20 11 1 0.35 0.39
 -20 -11 -1 0.39 0.26
 20 11 -1 -0.24 0.4
 -20 -11 -1 0.28 0.27
 20 -11 1 0.43 0.37
 20 -12 -1 0.91 0.43
 -20 -12 1 0.07 0.26
 -20 -12 1 0.2 0.24
 20 12 1 0.38 0.38
 20 -12 1 0.47 0.37
 -20 -12 -1 0.58 0.28
 -20 -12 -1 0.44 0.24
 20 12 -1 0.16 0.36
 20 13 1 0.23 0.31
 -20 -13 1 0.16 0.23
 -20 -13 1 0.22 0.23
 -20 -13 -1 0.26 0.24
 20 13 -1 0.23 0.33
 -20 -13 -1 0.16 0.24
 -20 -14 1 0.69 0.24
 -20 -14 1 0.44 0.25
 20 14 1 0.42 0.3
 20 14 -1 0.18 0.3
 -20 -14 -1 0.36 0.24
 -20 -14 -1 0.12 0.23
 20 15 1 0.14 0.25
 -20 -15 1 -0.24 0.2
 -20 -15 1 -0.27 0.19
 -20 -15 -1 -0.02 0.2
 20 15 -1 0.14 0.25
 -20 -15 -1 0.05 0.19
 20 16 1 0.28 0.23
 20 16 -1 0.34 0.23
 21 0 1 -0.02 0.28
 21 0 1 0.07 0.55
 21 0 -1 0.53 0.53
 21 0 -1 -0.11 0.27
 21 1 1 2.95 0.49
 21 -1 -1 3.37 0.69
 21 -1 -1 3.38 0.52
 21 1 -1 3.14 0.67
 21 1 -1 1.81 0.38
 21 -1 1 3.3 0.53
 21 -1 1 2.03 0.65
 21 -2 -1 12.28 1.07
 21 2 1 11.22 1.02
 21 -2 -1 14.32 1.36
 21 -2 1 12.57 1.36
 21 2 -1 11.08 1.02
 21 2 -1 11.96 1.35
 21 -2 1 13.6 1.08
 21 3 1 1.25 0.34
 21 -3 -1 1.82 0.66
 21 -3 -1 1.91 0.42
 21 -3 1 1.93 0.65
 21 3 -1 1.28 0.34
 21 -3 1 1.9 0.41
 21 4 1 0.18 0.28
 21 -4 -1 0.24 0.55
 21 -4 -1 0.53 0.36
 21 -4 1 1.14 0.59
 21 4 -1 0.19 0.28
 21 -4 1 0.41 0.35
 21 -5 -1 2.6 0.71
 21 -5 -1 3.99 0.64
 21 5 1 2.51 0.49
 21 -5 1 4.09 0.64
 21 -5 1 3.04 0.78
 21 -6 -1 28.68 2
 21 -6 -1 23.55 2.21
 21 6 1 21.75 1.83
 21 -6 1 30.45 1.97
 21 -6 1 22.77 2.21
 21 -7 -1 2.06 0.71
 21 -7 -1 1.34 0.48
 -21 -7 1 0.63 0.29
 21 -7 1 1.18 0.42
 21 -7 1 0.86 0.67
 21 -8 -1 0.71 0.64
 -21 -8 1 0.2 0.27
 -21 -8 1 0.56 0.28
 21 -8 -1 0.38 0.46
 21 -8 1 0.88 0.69
 -21 -8 -1 0.26 0.28
 21 -8 1 0.25 0.4
 -21 -8 -1 0.12 0.26
 21 -9 -1 7.07 0.87
 21 -9 -1 5.55 1.01
 -21 -9 1 5.32 0.6
 -21 -9 1 5.47 0.55
 -21 -9 -1 5.44 0.55
 -21 -9 -1 5.49 0.6
 21 -9 1 4.91 0.97
 21 -9 1 7.23 0.79
 -21 -10 1 16.62 1.19
 -21 -10 1 18.44 1.16
 21 -10 -1 18.01 1.82
 21 10 1 16.61 1.41
 -21 -10 -1 19.34 1.16
 -21 -10 -1 16.97 1.19
 21 -11 -1 3.1 0.59
 21 11 1 2.38 0.5
 -21 -11 1 2.52 0.39
 -21 -11 1 1.75 0.34
 21 -11 1 3.68 0.61
 -21 -11 -1 2.84 0.41
 -21 -11 -1 2.62 0.38
 21 11 -1 1.88 0.51
 -21 -12 1 1.62 0.31
 -21 -12 1 1.69 0.28
 21 12 1 1.81 0.42
 -21 -12 -1 1.85 0.32
 21 12 -1 1.29 0.42
 -21 -12 -1 1.55 0.27
 -21 -13 1 3.21 0.4
 -21 -13 1 3.32 0.44
 21 13 1 3.96 0.58
 -21 -13 -1 3.6 0.43
 21 13 -1 3.99 0.62
 -21 -13 -1 3.52 0.42
 21 14 1 9.18 0.74
 -21 -14 1 5.33 0.56
 21 14 -1 8.14 0.72
 -21 -14 -1 6.27 0.57
 22 0 1 0.29 0.29
 22 0 -1 0 0.27
 22 0 -1 -0.25 0.52
 22 -1 -1 0.56 0.31
 22 -1 -1 0.44 0.57
 22 1 1 0.52 0.3
 22 1 -1 0.58 0.59
 22 -1 1 1.22 0.6
 22 -1 1 0.37 0.31
 22 1 -1 0.93 0.31
 22 -2 -1 1.19 0.37
 22 -2 -1 1.97 0.66
 22 2 1 1.3 0.33
 22 -2 1 1.48 0.39
 22 2 -1 1.19 0.34
 22 -2 1 0.55 0.6
 22 -3 -1 7.18 0.72
 22 3 1 5.12 0.61
 22 -3 -1 5.45 0.88
 22 -3 1 5.69 0.7
 22 3 -1 3.99 0.6
 22 -3 1 6.33 0.94
 22 -4 -1 -0.07 0.35
 22 4 1 0.08 0.29
 22 -4 -1 0.13 0.56
 22 -4 1 0.6 0.38
 22 -4 1 0.25 0.62
 22 4 -1 0.4 0.29
 22 -5 -1 4.63 0.87
 22 5 1 4.08 0.57
 22 -5 -1 6.3 0.76
 22 -5 1 6.92 0.73
 22 -5 1 3.56 0.83
 22 -6 -1 10.51 1.34
 22 -6 -1 10.21 1.04
 22 -6 1 9.53 1.38
 22 -6 1 10.88 1.03
 22 -7 -1 2.49 0.72
 -22 -7 1 1.81 0.32
 22 -7 -1 1.53 0.49
 22 -7 1 1.42 0.48
 22 -7 1 2.24 0.75
 -22 -8 1 -0.05 0.24
 -22 -8 1 0.03 0.26
 22 -8 -1 -0.09 0.4
 22 -8 -1 0.16 0.63
 22 -8 1 -0.09 0.39
 22 -8 1 -0.34 0.67
 -22 -8 -1 -0.07 0.24
 22 -9 -1 11.08 0.99
 22 -9 -1 8.04 1.29
 -22 -9 1 7.85 0.69
 -22 -9 1 7.84 0.65
 -22 -9 -1 7.16 0.68
 22 -9 1 10.4 0.95
 -22 -9 -1 7.77 0.64
 -22 -10 1 6.47 0.55
 -22 -10 1 6.72 0.6
 -22 -10 -1 6.97 0.57
 -22 -10 -1 5.91 0.59
 -22 -11 1 1.18 0.26
 -22 -11 1 0.58 0.26
 -22 -11 -1 1.52 0.26
 -22 -11 -1 1.24 0.28
 -22 -12 1 0.21 0.23
 22 12 1 0.18 0.37
 -22 -12 1 0.08 0.2
 -22 -12 -1 0.21 0.21
 -22 -12 -1 -0.14 0.2
 -22 -13 1 5.23 0.5
 22 13 1 6.5 0.7
 -22 -13 -1 5.33 0.5
 23 0 -1 -0.18 0.29
 23 0 1 -0.19 0.29
 23 0 -1 -0.31 0.59
 23 -1 -1 3.44 0.77
 23 1 1 3.77 0.54
 23 -1 -1 3.57 0.56
 23 -1 1 4.27 0.59
 23 1 -1 4.32 0.56
 23 2 1 3.06 0.5
 23 -2 -1 3.34 0.75
 23 -2 -1 4.48 0.57
 23 -2 1 1.75 0.71
 23 2 -1 1.88 0.4
 23 -2 1 3.63 0.56
 23 -3 -1 7.6 0.78
 23 -3 -1 8.16 1.15
 23 3 1 6.32 0.68
 23 3 -1 6.29 0.68
 23 -3 1 6.86 0.77
 23 -3 1 8 1.2
 23 -4 -1 0.67 0.65
 23 4 1 0.72 0.3
 23 -4 -1 0.78 0.4
 23 -4 1 1.15 0.66
 23 -4 1 0.49 0.38
 23 -5 -1 12.73 1.48
 23 -5 -1 15.15 1.22
 23 5 1 11.04 1.05
 23 -5 1 11.38 1.5
 23 -5 1 16.57 1.21
 23 -6 -1 1.2 0.45
 23 -6 -1 0.45 0.64
 23 -6 1 0.31 0.67
 23 -6 1 0.35 0.4
 23 -7 -1 6.16 1.16
 23 -7 -1 8.53 0.88
 -23 -7 -1 5.4 0.55
 23 -7 1 4.69 0.97
 23 -8 -1 1.25 0.69
 -23 -8 1 1.69 0.29
 -23 -8 -1 2.85 0.39
 -23 -9 1 9.27 0.78
 -23 -9 1 11.31 0.75
 -23 -9 -1 11.11 0.76
 -23 -9 -1 10.19 0.78
 -23 -10 1 -0.37 0.21
 -23 -10 1 0.03 0.24
 -23 -10 -1 0.15 0.23
 -23 -10 -1 0.38 0.22
 -23 -11 1 0.46 0.2
 -23 -11 1 0.49 0.23
 -23 -11 -1 0.2 0.23
 -23 -11 -1 0.56 0.22
 -23 -12 1 0.03 0.19
 -23 -12 -1 -0.03 0.19
 24 0 1 0.29 0.3
 24 0 -1 0.03 0.31
 24 -1 -1 4 0.81
 24 1 1 2.81 0.52
 24 -1 -1 3.76 0.57
 24 1 -1 3.18 0.54
 24 -1 1 3.51 0.56
 24 -2 -1 0.26 0.34
 24 2 1 0.2 0.3
 24 -2 -1 -0.01 0.63
 24 -2 1 0.08 0.33
 24 -3 -1 5.21 0.92
 24 -3 -1 5.58 0.69
 24 -3 1 4.94 0.95
 24 -3 1 6.34 0.72
 24 -4 -1 -0.96 0.59
 24 -4 -1 0.04 0.39
 24 -4 1 0.43 0.66
 24 -4 1 -0.22 0.35
 24 -5 -1 9.49 1.27
 24 -5 1 8.45 1.31
 24 -6 -1 0.69 0.63
 24 -6 1 -0.16 0.65
 24 -7 -1 4.69 0.92
 -24 -7 -1 5.23 0.49
 -24 -8 1 0.03 0.21
 -24 -8 -1 0.11 0.22
 -24 -9 1 9.35 0.68
 -24 -9 -1 9.72 0.67
 -24 -10 1 0.12 0.19
 -24 -10 -1 0.19 0.2
 25 -2 -1 2.41 0.77
 25 -3 -1 2.45 0.75
 25 -4 -1 1.03 0.69
 0 -2 2 1.13 0.11
 0 3 2 0.12 0.08
 0 4 -2 38.77 3.01
 0 4 2 41.57 3.02
 0 5 2 0.13 0.15
 0 5 -2 0.08 0.09
 0 5 2 -0.01 0.11
 0 6 -2 7.28 0.61
 0 6 2 7.94 0.63
 0 6 2 7.38 0.61
 0 6 -2 6.91 0.56
 0 7 2 0.01 0.13
 0 7 -2 0.33 0.12
 0 7 -2 0.17 0.14
 0 7 2 0.17 0.17
 0 8 -2 2.56 0.31
 0 8 2 2.66 0.37
 0 8 2 2.86 0.34
 0 8 -2 2.69 0.31
 0 9 2 0.16 0.19
 0 9 -2 0.07 0.15
 0 9 2 -0.03 0.14
 0 9 -2 -0.09 0.11
 0 10 2 4.63 0.49
 0 10 2 5.11 0.5
 0 10 -2 4.21 0.46
 0 10 -2 5.07 0.46
 0 11 2 0.12 0.22
 0 11 2 0.07 0.17
 0 11 -2 0.32 0.19
 0 -11 2 -0.08 0.48
 0 11 -2 0.17 0.15
 0 -12 2 10.68 2.09
 0 12 -2 13.03 0.98
 0 12 2 12.64 1
 0 12 2 13.63 1.1
 0 -12 -2 12.66 2.08
 0 -13 2 0.05 0.47
 0 -13 2 0.02 0.18
 0 -13 -2 0.29 0.46
 0 13 2 -0.09 0.18
 0 13 2 0.33 0.24
 0 13 -2 -0.11 0.17
 0 -14 -2 0.07 0.47
 0 -14 2 -0.1 0.49
 0 -14 2 0 0.19
 0 14 2 0.34 0.25
 0 14 -2 -0.18 0.21
 0 14 2 0.18 0.22
 0 15 -2 0.05 0.22
 0 -15 2 -0.07 0.21
 0 15 2 -0.07 0.16
 0 15 2 0.25 0.24
 0 -15 2 -0.05 0.47
 0 -15 -2 0.03 0.45
 0 16 -2 10.94 0.94
 0 16 -2 11.49 0.77
 0 -16 2 11.46 2.06
 0 16 2 11.64 0.98
 0 16 2 11.14 0.77
 0 -16 -2 11.67 1.99
 0 -17 -2 -0.06 0.44
 0 17 -2 -0.04 0.18
 0 17 2 -0.07 0.23
 0 -17 2 -0.19 0.45
 0 17 -2 -0.11 0.24
 0 17 2 0.03 0.17
 0 18 2 10.24 0.91
 0 -18 2 9.41 1.89
 0 18 -2 9.97 0.89
 0 -18 2 9.04 1.25
 0 18 -2 10.38 0.72
 0 -18 -2 10.05 1.87
 0 18 2 9.81 0.71
 0 -19 -2 -0.16 0.45
 0 19 2 0.23 0.19
 0 19 2 0.09 0.18
 0 -19 2 -0.41 0.42
 0 19 -2 0.18 0.19
 0 20 -2 0.52 0.21
 0 20 2 0.27 0.21
 0 20 -2 0.45 0.2
 0 -20 -2 0.56 0.5
 0 20 2 0.16 0.19
 0 -20 2 0.38 0.46
 0 -21 2 -0.15 0.42
 0 21 2 -0.12 0.17
 0 21 -2 0.15 0.18
 0 21 2 -0.22 0.17
 0 21 -2 -0.03 0.19
 0 -21 -2 0.28 0.43
 0 22 -2 2.23 0.34
 0 22 2 2.93 0.35
 0 22 2 3.06 0.34
 0 22 -2 3.61 0.37
 0 -22 2 2.24 0.7
 0 23 2 -0.1 0.15
 0 23 -2 -0.31 0.15
 0 23 2 0.06 0.16
 0 24 2 0.03 0.14
 0 24 -2 -0.06 0.14
 -1 -2 2 2.48 0.16
 1 2 2 2.76 0.23
 1 -2 2 2.06 0.19
 1 3 2 7.55 0.6
 -1 3 2 7.39 0.59
 1 4 2 20.42 1.57
 1 4 -2 20.55 1.56
 -1 4 2 20.61 1.56
 -1 5 -2 2.26 0.24
 1 5 2 2.38 0.29
 1 5 2 2.24 0.32
 -1 5 2 2.02 0.3
 -1 5 2 2.65 0.27
 1 5 -2 2.31 0.26
 1 5 -2 2.13 0.25
 -1 6 -2 10.6 0.83
 -1 6 -2 9.2 0.75
 1 6 2 10.41 0.79
 1 6 2 11.13 0.86
 1 6 -2 11.22 0.76
 -1 6 2 9.92 0.84
 1 6 -2 10.92 0.84
 -1 6 2 10.34 0.79
 1 7 2 2.91 0.33
 -1 7 -2 2.51 0.28
 -1 7 -2 2.48 0.3
 1 7 2 3.17 0.36
 1 7 -2 2.46 0.31
 1 7 -2 2.52 0.29
 -1 7 2 2.34 0.3
 -1 7 2 2.4 0.34
 1 8 2 10.03 0.76
 1 8 2 10.05 0.82
 -1 8 -2 8.72 0.71
 -1 8 -2 9.67 0.78
 -1 8 2 9.13 0.75
 1 8 -2 9.52 0.72
 1 8 -2 9.72 0.79
 -1 8 2 9.27 0.8
 -1 9 -2 0.3 0.16
 1 9 2 -0.03 0.18
 -1 9 -2 0.31 0.13
 1 9 2 0.24 0.17
 1 9 -2 0.16 0.16
 -1 9 2 0.2 0.19
 -1 9 2 0.13 0.15
 1 9 -2 0.02 0.13
 -1 10 -2 5.44 0.48
 1 10 2 5.03 0.52
 1 10 2 4.83 0.52
 -1 10 -2 4.71 0.48
 1 10 -2 5.27 0.51
 -1 10 2 5.32 0.52
 -1 10 2 4.79 0.52
 1 10 -2 5.46 0.49
 -1 11 -2 0.18 0.18
 1 11 2 -0.05 0.18
 1 11 2 0.38 0.2
 -1 -11 2 -0.09 0.44
 -1 11 2 0.27 0.17
 1 -11 2 -0.02 0.53
 -1 11 2 0.4 0.21
 1 11 -2 0.32 0.2
 -1 12 -2 1.56 0.3
 -1 -12 2 1.2 0.6
 1 12 2 1.63 0.32
 1 -12 -2 0.95 0.59
 1 12 2 2.19 0.36
 1 -12 2 0.8 0.61
 -1 -12 -2 0.94 0.56
 -1 12 2 2.08 0.34
 -1 12 2 1.64 0.33
 1 12 -2 1.87 0.31
 -1 -13 2 1.78 0.67
 1 13 2 3.68 0.45
 -1 -13 2 2.75 0.36
 -1 13 -2 3.37 0.41
 1 13 2 3.02 0.42
 1 -13 -2 2.14 0.7
 1 -13 2 3.22 0.39
 -1 13 2 3.31 0.42
 1 -13 2 1.48 0.75
 1 13 -2 2.63 0.39
 -1 -13 -2 2.08 0.68
 -1 13 2 2.92 0.41
 -1 -14 2 0.2 0.19
 1 -14 -2 0.2 0.51
 -1 14 -2 0.58 0.23
 1 14 2 0.61 0.26
 -1 -14 2 0.04 0.48
 1 14 2 0.26 0.24
 -1 14 2 0.48 0.26
 1 -14 2 0.09 0.21
 1 14 -2 0.22 0.23
 -1 -14 -2 0.26 0.47
 1 -14 2 0.1 0.5
 -1 15 -2 4.26 0.48
 1 15 2 3.28 0.35
 -1 -15 2 2.44 0.81
 1 15 2 3.54 0.49
 1 -15 -2 4.13 1.3
 1 -15 2 2.65 0.85
 1 -15 2 3.22 0.44
 -1 15 2 3.6 0.48
 1 15 -2 3.82 0.37
 1 15 -2 4.16 0.47
 -1 -15 -2 2.28 0.79
 1 16 2 0 0.23
 -1 16 -2 -0.06 0.22
 1 16 2 0.1 0.18
 1 -16 -2 0.02 0.46
 -1 -16 2 -0.05 0.49
 1 -16 2 -0.14 0.49
 -1 -16 -2 0.03 0.45
 1 -16 2 0.03 0.24
 1 16 -2 0.15 0.18
 1 16 -2 0.09 0.23
 -1 16 2 -0.35 0.23
 1 17 2 3.6 0.36
 1 17 2 3.47 0.53
 1 17 2 2.76 0.36
 -1 -17 2 2.11 0.75
 -1 17 -2 3.39 0.49
 1 -17 -2 2.33 0.77
 1 -17 2 1.77 0.59
 1 17 -2 3.66 0.49
 1 17 -2 3.37 0.36
 -1 17 2 3.1 0.51
 1 -17 2 1.69 0.76
 -1 -17 -2 2.25 0.74
 -1 -18 2 -0.15 0.46
 1 18 2 0.35 0.29
 1 -18 -2 0.31 0.53
 1 18 2 0.12 0.18
 1 18 2 0.13 0.18
 1 18 -2 0.26 0.28
 1 -18 2 0.08 0.5
 1 -18 2 0.23 0.47
 1 18 -2 0.08 0.19
 -1 -18 -2 -0.11 0.46
 1 18 -2 0.07 0.19
 -1 18 2 0.04 0.26
 -1 -19 2 5.35 1.44
 1 19 2 4.96 0.49
 1 -19 -2 6.71 1.5
 1 19 2 6.5 0.51
 -1 -19 -2 5.36 1.38
 1 19 -2 5.93 0.51
 1 19 -2 6.18 0.51
 1 -19 2 6.41 1.5
 -1 -20 2 0.12 0.44
 1 20 2 -0.03 0.19
 1 20 2 0.13 0.18
 1 -20 -2 0.25 0.46
 1 20 -2 0.05 0.18
 1 20 -2 0.06 0.19
 1 -20 2 -0.23 0.43
 -1 -20 -2 0.14 0.46
 1 -21 -2 0.59 0.46
 1 21 2 0.76 0.21
 -1 -21 2 0.45 0.47
 1 21 2 0.78 0.2
 1 21 -2 0.63 0.21
 -1 21 2 0.82 0.2
 1 -21 2 0.35 0.48
 1 21 -2 0.59 0.2
 -1 -22 2 0.27 0.44
 1 22 2 -0.01 0.17
 1 22 2 -0.02 0.17
 -1 22 -2 0.25 0.19
 -1 22 2 0.02 0.17
 1 22 -2 -0.05 0.18
 1 22 -2 -0.05 0.18
 1 -22 2 -0.29 0.37
 1 23 2 0.26 0.16
 -1 23 -2 0.47 0.18
 1 23 2 0.45 0.17
 1 23 -2 0.57 0.18
 1 23 -2 0.42 0.17
 -1 23 2 0.61 0.18
 1 24 2 0.1 0.14
 1 24 -2 0.09 0.13
 2 0 2 55.32 3.29
 -2 0 -2 54.23 3.29
 2 1 2 26.49 1.5
 -2 1 -2 25.69 1.49
 2 -1 2 21.33 1.56
 2 -1 2 25.1 1.49
 -2 -1 -2 24.75 1.5
 2 1 -2 24.83 1.49
 2 2 2 7.42 0.58
 -2 -2 2 7.58 0.45
 2 2 -2 7.41 0.45
 2 -2 2 6.3 0.49
 2 -2 2 7.47 0.46
 -2 -3 2 13.8 0.86
 2 3 2 14.54 1.1
 -2 -4 2 2.3 0.19
 2 4 2 3.09 0.3
 2 5 2 26.44 1.99
 2 5 2 27.54 1.76
 -2 5 -2 24.97 1.96
 2 5 -2 25.5 1.73
 -2 5 2 25.95 1.97
 2 6 2 6.48 0.56
 -2 6 -2 6.19 0.5
 -2 6 -2 5.13 0.48
 2 6 2 6.28 0.53
 2 6 -2 6.24 0.51
 -2 6 2 6.26 0.53
 2 6 -2 6.16 0.54
 -2 7 -2 10.74 0.86
 -2 7 -2 12.06 0.95
 2 7 2 12.66 0.92
 2 7 2 13.13 1
 2 7 -2 12.26 0.98
 -2 7 2 10.87 0.89
 2 7 -2 12.44 0.88
 -2 7 2 12.69 0.98
 2 8 2 0.11 0.19
 2 8 2 0.19 0.15
 -2 8 -2 0.18 0.15
 -2 8 -2 0.22 0.12
 -2 8 2 0.3 0.19
 -2 8 2 0.08 0.13
 2 8 -2 0.39 0.17
 2 8 -2 0.11 0.14
 -2 9 -2 5.15 0.47
 2 9 2 4.93 0.52
 2 9 2 4.83 0.51
 -2 9 -2 4.72 0.47
 -2 9 2 5.1 0.5
 2 9 -2 5.9 0.51
 -2 9 2 5.15 0.52
 2 9 -2 5.6 0.5
 -2 10 -2 2.36 0.34
 2 10 2 2.7 0.4
 2 10 2 2.56 0.37
 -2 10 2 2.68 0.38
 -2 10 2 2.63 0.34
 2 10 -2 2.61 0.37
 -2 11 -2 6.76 0.57
 2 11 2 6.65 0.63
 2 11 2 5.84 0.61
 2 -11 2 5.94 1.6
 -2 11 2 6.45 0.62
 2 11 -2 6.57 0.58
 -2 11 2 6.22 0.6
 2 12 2 6.57 0.65
 -2 12 -2 6.69 0.6
 -2 -12 2 6.33 1.41
 2 12 2 6.75 0.67
 2 -12 -2 7.36 1.52
 -2 12 2 6.79 0.63
 2 -12 2 5.94 1.57
 -2 12 2 6.89 0.65
 2 12 -2 7.08 0.63
 -2 -12 -2 6.93 1.44
 -2 -13 2 1.94 0.63
 2 13 2 2.61 0.42
 2 13 2 2.44 0.39
 -2 -13 2 2.74 0.34
 -2 13 -2 2.88 0.38
 2 -13 -2 1.65 0.65
 2 13 -2 2.58 0.39
 2 -13 2 0.89 0.71
 -2 -13 -2 1.46 0.65
 -2 13 2 2.56 0.41
 2 -13 2 2.46 0.36
 2 14 2 2.61 0.45
 -2 -14 2 2.11 0.71
 -2 14 -2 3 0.4
 2 14 2 2.46 0.42
 2 -14 -2 1.58 0.72
 2 -14 2 1.73 0.72
 -2 -14 -2 2.12 0.67
 2 14 -2 2.27 0.39
 2 -14 2 2.31 0.4
 -2 14 2 2.64 0.43
 -2 15 -2 8 0.69
 2 -15 -2 7.95 1.68
 -2 -15 2 8.89 1.65
 2 15 2 7.33 0.76
 2 15 2 7.02 0.72
 2 15 2 6.66 0.54
 2 -15 2 6.45 1.67
 2 15 -2 7.29 0.56
 2 -15 2 7.65 0.69
 2 15 -2 7.3 0.7
 -2 -15 -2 6.09 1.57
 -2 15 2 7.71 0.71
 2 -16 -2 0.91 0.6
 -2 -16 2 0.93 0.6
 -2 16 -2 1.02 0.3
 2 16 2 1.34 0.34
 2 16 2 1.24 0.24
 2 16 2 1.07 0.23
 2 -16 2 0.38 0.47
 2 16 -2 1.03 0.22
 -2 -16 -2 0.78 0.57
 2 -16 2 0.34 0.3
 -2 16 2 0.72 0.3
 2 16 -2 1.08 0.24
 2 16 -2 1.11 0.32
 2 -16 2 0.7 0.61
 2 17 2 2.08 0.41
 2 17 2 1 0.23
 -2 17 -2 1.28 0.32
 2 -17 -2 0.55 0.58
 -2 -17 2 0.34 0.53
 2 17 2 1.44 0.25
 2 -17 2 0.93 0.61
 2 17 -2 1.08 0.31
 2 -17 2 1.24 0.55
 2 17 -2 0.99 0.23
 -2 -17 -2 0.9 0.55
 2 17 -2 1.65 0.24
 -2 17 2 1.74 0.37
 2 18 2 0.36 0.19
 2 18 2 0.14 0.18
 2 -18 -2 0.03 0.49
 -2 -18 2 0.13 0.47
 2 18 2 0.1 0.27
 2 18 -2 0.03 0.26
 2 -18 2 0.31 0.47
 2 18 -2 0.25 0.19
 -2 -18 -2 0.23 0.48
 -2 18 2 -0.21 0.25
 2 18 -2 0.33 0.2
 2 -18 2 0.29 0.5
 2 19 2 1.04 0.23
 2 -19 -2 0.04 0.48
 -2 -19 2 0.06 0.47
 2 19 2 0.43 0.2
 2 -19 2 0.41 0.55
 -2 -19 -2 0.21 0.46
 2 19 -2 0.7 0.21
 2 19 -2 0.7 0.21
 2 20 2 2.29 0.32
 2 -20 -2 1.3 0.63
 2 20 2 1.43 0.26
 -2 -20 2 1.19 0.61
 2 20 -2 2.48 0.33
 2 -20 2 1.2 0.64
 2 20 -2 2.21 0.32
 -2 -20 -2 0.98 0.57
 2 21 2 0.22 0.18
 2 21 2 0.02 0.17
 2 -21 -2 0.15 0.43
 -2 -21 2 -0.07 0.39
 2 -21 2 -0.07 0.44
 2 21 -2 0.23 0.19
 2 21 -2 0.06 0.18
 -2 -22 2 0.7 0.47
 2 22 2 0.83 0.2
 2 22 2 0.94 0.21
 2 22 -2 1.16 0.22
 2 22 -2 0.78 0.21
 2 -22 2 0.75 0.48
 2 23 2 0.01 0.15
 2 23 2 -0.16 0.14
 -2 23 -2 -0.25 0.15
 -2 23 2 -0.07 0.16
 2 23 -2 -0.01 0.16
 2 23 -2 -0.01 0.16
 2 24 2 0.02 0.13
 2 24 -2 0.14 0.13
 -3 0 -2 68.05 3.86
 3 0 2 67.91 3.86
 3 0 -2 61.22 3.86
 3 0 2 59.78 4.02
 3 1 2 23.87 1.57
 -3 -1 2 25.97 1.51
 3 1 2 26.8 1.52
 -3 1 -2 25.15 1.51
 3 1 2 25.12 1.88
 3 -1 2 25.7 1.51
 3 -1 2 21.77 1.57
 3 1 -2 24.75 1.51
 -3 -1 -2 24.91 1.52
 3 2 2 8.17 0.66
 -3 -2 2 8.8 0.51
 3 -2 2 8.59 0.52
 -3 -2 -2 8.05 0.53
 3 2 -2 8.53 0.52
 3 -2 2 7.08 0.55
 3 3 2 0.3 0.12
 -3 -3 2 0.33 0.06
 3 -3 2 0.39 0.08
 -3 -3 -2 0.27 0.09
 3 -3 2 0.19 0.09
 3 4 2 19.37 1.42
 3 4 2 19.03 1.26
 -3 -4 2 18.36 1.12
 -3 -4 -2 14.95 1.14
 3 -4 2 19.37 1.47
 3 4 -2 18.92 1.23
 -3 -5 2 5.77 0.39
 3 5 2 6.14 0.52
 3 5 2 6.15 0.53
 -3 5 2 5.48 0.5
 3 5 -2 6.16 0.48
 -3 6 -2 4.09 0.4
 -3 -6 2 4.51 0.33
 -3 6 -2 4.58 0.4
 3 6 2 5.46 0.47
 3 6 2 5.24 0.47
 3 6 -2 4.98 0.43
 -3 6 2 4.73 0.43
 -3 7 -2 0.71 0.17
 -3 -7 2 0.68 0.12
 -3 7 -2 0.62 0.13
 3 7 2 0.45 0.21
 3 7 2 0.8 0.2
 3 7 -2 0.82 0.19
 -3 7 2 0.75 0.17
 -3 -8 2 2.43 0.23
 3 8 2 3.2 0.36
 3 8 2 3.11 0.41
 -3 8 -2 2.5 0.33
 -3 8 2 2.6 0.35
 3 8 -2 3.26 0.37
 -3 8 2 2.38 0.32
 -3 9 -2 9.78 0.73
 3 9 2 10.72 0.81
 3 9 2 9.49 0.83
 -3 9 2 8.28 0.75
 3 9 -2 9.27 0.76
 -3 9 2 9.41 0.8
 3 10 2 0.72 0.23
 -3 10 -2 0.77 0.21
 3 10 2 1.08 0.29
 -3 10 2 0.74 0.2
 -3 10 2 0.8 0.25
 3 10 -2 0.71 0.22
 -3 11 -2 19.78 1.48
 3 11 2 21.83 1.72
 3 11 2 23.41 1.56
 3 11 -2 21.15 1.5
 -3 11 2 20.79 1.52
 -3 11 2 20.83 1.68
 -3 12 -2 2.88 0.39
 3 -12 -2 2.36 0.74
 3 12 2 3.74 0.47
 3 12 2 3.27 0.42
 -3 -12 -2 2.14 0.67
 -3 12 2 3.12 0.44
 3 12 -2 3.74 0.43
 3 -12 2 2.08 0.87
 3 13 2 0.03 0.2
 -3 13 -2 0.03 0.18
 3 -13 -2 0.35 0.51
 3 13 2 0.11 0.25
 -3 -13 2 -0.02 0.41
 3 13 -2 0.15 0.21
 3 -13 2 -0.26 0.51
 -3 13 2 0.01 0.21
 3 -13 2 -0.14 0.19
 -3 -13 -2 0.24 0.44
 3 14 2 0.76 0.29
 -3 14 -2 1.56 0.3
 -3 -14 2 0.96 0.55
 3 14 2 0.76 0.3
 3 -14 -2 0.38 0.52
 -3 -14 -2 0.55 0.52
 3 -14 2 1.14 0.28
 -3 14 2 1.16 0.3
 3 -14 2 0.65 0.66
 3 14 -2 1.46 0.33
 -3 15 -2 0.25 0.23
 3 -15 -2 0.02 0.5
 3 15 2 0.26 0.19
 3 15 2 0.08 0.23
 -3 -15 2 0.18 0.47
 3 15 2 0.1 0.17
 3 15 -2 0.06 0.17
 -3 -15 -2 0.19 0.48
 -3 15 2 0.27 0.25
 3 15 -2 0.23 0.24
 3 -15 2 0.32 0.25
 3 -15 2 0.38 0.48
 3 -15 2 0.15 0.56
 3 15 -2 0.19 0.19
 3 16 2 6.83 0.56
 3 -16 -2 7.3 1.69
 -3 16 -2 7.57 0.7
 3 16 2 6.63 0.73
 3 16 2 7.47 0.57
 -3 -16 2 7.41 1.62
 3 16 -2 7.8 0.58
 3 -16 2 7.61 1.04
 3 -16 2 6.61 1.71
 -3 16 2 7 0.72
 3 16 -2 7.5 0.57
 -3 -16 -2 6.18 1.58
 3 -16 2 6.88 0.7
 3 16 -2 7.29 0.72
 3 17 2 0.43 0.2
 -3 -17 2 -0.05 0.49
 3 17 2 0.09 0.25
 3 17 2 0.16 0.19
 3 -17 -2 -0.19 0.48
 -3 17 2 0.14 0.27
 3 -17 2 0.43 0.48
 -3 -17 -2 0.25 0.47
 3 -17 2 0.04 0.51
 3 17 -2 0.57 0.28
 3 17 -2 0.3 0.2
 3 17 -2 0.46 0.2
 3 18 2 -0.03 0.26
 3 18 2 -0.05 0.17
 3 18 2 0.02 0.18
 3 -18 -2 -0.15 0.46
 -3 -18 2 -0.05 0.44
 3 -18 -2 0.21 0.5
 3 18 -2 0.08 0.27
 3 18 -2 -0.04 0.18
 3 18 -2 0.16 0.19
 3 -18 2 0.13 0.54
 -3 18 2 -0.35 0.27
 -3 -18 -2 0.16 0.5
 3 -18 2 0.41 0.51
 -3 -19 2 0.94 0.61
 3 19 2 2.82 0.35
 3 19 2 2.78 0.37
 3 -19 -2 1.86 0.74
 3 -19 2 2.27 0.78
 -3 -19 -2 1.77 0.68
 3 19 -2 3.23 0.36
 3 19 -2 2.58 0.35
 -3 -20 2 -0.06 0.45
 3 20 2 0.23 0.19
 3 -20 -2 0.19 0.49
 3 20 2 0.11 0.19
 -3 -20 -2 -0.1 0.43
 3 20 -2 0.52 0.2
 3 20 -2 0.12 0.19
 3 -20 2 -0.34 0.48
 3 -21 -2 0.39 0.43
 -3 -21 2 0.3 0.44
 3 21 2 -0.2 0.17
 3 21 2 0.01 0.17
 3 21 -2 0 0.17
 3 21 -2 -0.21 0.17
 3 -21 2 -0.05 0.43
 3 22 2 0.25 0.17
 -3 -22 2 0.34 0.42
 3 22 2 -0.05 0.16
 3 22 -2 -0.21 0.16
 3 22 -2 0.05 0.17
 3 -22 2 0.03 0.39
 3 23 2 3.49 0.35
 3 23 2 4.29 0.38
 3 23 -2 4.7 0.37
 3 23 -2 3.53 0.36
 3 24 2 0.67 0.16
 3 24 -2 0.83 0.16
 4 0 2 0.47 0.08
 4 0 -2 0.47 0.08
 4 0 2 0.36 0.07
 -4 0 -2 0.54 0.09
 4 1 2 12.61 0.76
 4 1 2 13.03 0.94
 4 1 2 11.02 0.77
 -4 -1 2 12.78 0.75
 -4 1 -2 12.39 0.76
 -4 -1 -2 12.26 0.76
 4 1 -2 12.07 0.75
 4 -1 2 10.75 0.79
 4 -1 2 12.38 0.76
 4 2 2 -0.01 0.07
 4 2 2 0.03 0.1
 -4 -2 2 0.05 0.05
 4 2 -2 0.13 0.07
 4 -2 2 0.07 0.07
 4 -2 2 0.12 0.08
 -4 -2 -2 0.13 0.08
 4 3 2 25.26 1.94
 -4 -3 2 25.84 1.54
 4 -3 2 28.19 1.97
 4 3 -2 25.4 1.67
 4 -3 2 22.41 1.63
 -4 -3 -2 23.74 1.56
 4 3 -2 25.79 1.54
 4 -3 2 25.94 1.55
 4 4 2 0.12 0.14
 -4 -4 2 0.19 0.06
 4 4 2 0.22 0.13
 -4 -4 -2 0.12 0.08
 4 -4 2 0.01 0.16
 4 -4 2 0.23 0.09
 4 4 -2 0.15 0.11
 4 5 2 0.24 0.15
 4 5 2 0.21 0.15
 -4 -5 2 0.15 0.07
 4 -5 2 0.24 0.2
 -4 -5 -2 0.03 0.09
 4 5 -2 0.06 0.12
 4 6 2 8.53 0.71
 -4 -6 2 8.13 0.53
 4 6 2 8.31 0.66
 4 -6 2 8.61 0.82
 -4 6 2 7.86 0.66
 4 6 -2 7.77 0.62
 -4 -6 -2 6.91 0.55
 -4 7 -2 0.4 0.16
 4 7 2 0.84 0.2
 4 7 2 0.66 0.23
 -4 -7 2 0.37 0.1
 4 7 -2 0.59 0.18
 -4 7 2 0.53 0.15
 4 -7 2 0.61 0.3
 -4 -8 2 0.67 0.12
 4 8 2 0.55 0.24
 4 8 2 0.51 0.19
 -4 8 -2 0.78 0.2
 -4 8 2 0.61 0.17
 4 8 -2 0.94 0.22
 4 9 2 21.35 1.71
 4 9 2 23.58 1.56
 -4 9 -2 20.12 1.47
 -4 9 2 21.04 1.51
 4 9 -2 20.24 1.5
 -4 9 2 22.08 1.67
 4 10 2 1.72 0.34
 -4 10 -2 1.7 0.28
 4 10 2 1.23 0.28
 -4 10 2 1.74 0.31
 -4 10 2 1.68 0.29
 4 10 -2 1.62 0.31
 4 11 2 2.7 0.37
 -4 11 -2 2.53 0.35
 4 -11 -2 1.67 0.62
 4 11 2 2.44 0.43
 4 -11 2 0.68 0.43
 4 11 -2 2.79 0.39
 4 -11 2 1.02 0.76
 -4 11 2 2.54 0.39
 4 12 2 1.76 0.34
 4 -12 -2 1.22 0.64
 4 12 2 1.86 0.37
 -4 12 -2 2.13 0.34
 4 -12 2 1.3 0.76
 4 12 -2 2.17 0.38
 4 -12 2 1.77 0.31
 4 -12 2 1.12 0.5
 -4 12 2 1.82 0.34
 4 13 2 1.26 0.33
 4 -13 -2 0.8 0.6
 -4 13 -2 1.48 0.29
 4 13 2 0.69 0.28
 4 13 -2 1.15 0.29
 -4 13 2 1.44 0.33
 -4 -13 -2 0.47 0.49
 4 -13 2 0.66 0.69
 4 -13 2 1.42 0.52
 4 -13 2 1.24 0.29
 4 14 2 2.38 0.43
 -4 -14 2 1.68 0.62
 -4 14 -2 2.63 0.4
 4 -14 -2 2.05 0.75
 4 14 2 2.33 0.42
 4 14 2 2.44 0.32
 -4 -14 -2 1.81 0.64
 4 -14 2 2.35 0.64
 4 14 -2 2.76 0.33
 4 -14 2 2.24 0.38
 4 -14 2 1.9 0.85
 -4 14 2 3.03 0.44
 4 14 -2 2.55 0.42
 -4 15 -2 9.24 0.8
 4 15 2 9.23 0.66
 4 15 2 9.58 0.86
 4 -15 -2 10.51 1.94
 -4 -15 2 10.25 1.82
 4 15 2 8.63 0.66
 4 15 -2 9.59 0.82
 -4 -15 -2 9.43 1.8
 4 -15 2 8.86 1.14
 -4 15 2 9.71 0.83
 4 15 -2 8.67 0.66
 4 -15 2 9.15 0.82
 4 15 -2 8.57 0.73
 4 -15 2 7.29 1.91
 4 15 -2 8.64 0.66
 4 16 2 2.69 0.34
 4 -16 -2 2.37 0.81
 4 16 2 3.39 0.52
 -4 -16 2 2.41 0.78
 4 16 2 3.18 0.35
 4 -16 -2 0.81 0.59
 4 -16 2 1.67 0.82
 4 -16 2 3.16 0.47
 4 -16 2 3.6 0.73
 4 16 -2 2.92 0.35
 4 16 -2 2.71 0.36
 -4 -16 -2 1.81 0.73
 4 16 -2 2.93 0.47
 -4 16 2 2.86 0.45
 -4 -17 2 -0.09 0.45
 4 17 2 0.57 0.21
 4 -17 -2 0.48 0.57
 4 -17 -2 1.28 0.59
 4 17 2 0.38 0.2
 4 17 2 0.51 0.31
 4 -17 2 0.17 0.58
 -4 17 2 0.41 0.3
 4 17 -2 0.65 0.21
 4 -17 2 0.78 0.51
 -4 -17 -2 0.53 0.52
 4 17 -2 0.75 0.22
 4 17 -2 0.47 0.28
 4 18 2 0.05 0.18
 4 -18 -2 0.17 0.55
 4 -18 -2 -0.24 0.47
 4 18 2 0.22 0.27
 -4 -18 2 0.41 0.52
 4 18 2 0.21 0.19
 4 18 -2 0.22 0.19
 4 18 -2 0.29 0.19
 4 -18 2 0.37 0.47
 4 18 -2 0.42 0.26
 -4 18 2 0.33 0.31
 4 -18 2 0.03 0.55
 -4 -18 -2 0.1 0.47
 4 19 2 2.09 0.32
 -4 -19 2 1.03 0.57
 4 -19 -2 0.53 0.59
 4 19 2 1.23 0.25
 4 19 -2 1.69 0.25
 -4 -19 -2 1.5 0.62
 4 19 -2 1.83 0.27
 4 -19 2 1.12 0.69
 4 -20 -2 0.44 0.48
 -4 -20 2 -0.01 0.44
 4 20 2 0.67 0.21
 4 20 2 0.86 0.21
 4 20 -2 1.01 0.22
 -4 -20 -2 0.36 0.48
 4 -20 2 0.29 0.53
 4 20 -2 0.74 0.21
 -4 -21 2 0.3 0.46
 4 21 2 0.46 0.19
 4 -21 -2 0.43 0.41
 4 21 2 0.04 0.18
 4 -21 2 0.07 0.42
 4 21 -2 0.24 0.18
 4 21 -2 0.23 0.18
 4 22 2 3.67 0.36
 4 22 2 2.74 0.33
 4 22 -2 3.08 0.34
 4 22 -2 2.71 0.34
 4 23 2 0.24 0.15
 4 23 2 0.25 0.15
 4 23 -2 0.17 0.16
 4 23 -2 0.36 0.16
 5 0 2 25.33 1.51
 5 0 2 23.28 1.56
 -5 0 -2 26.26 1.52
 5 0 -2 23.99 1.51
 5 -1 -2 1.99 0.19
 5 1 2 2.32 0.19
 5 1 2 2.23 0.18
 -5 1 -2 2.31 0.21
 5 -1 2 2.12 0.2
 -5 -1 -2 2.21 0.2
 5 -1 2 2.38 0.3
 5 -1 2 2.24 0.19
 5 1 -2 2.34 0.19
 5 2 2 3.01 0.31
 5 2 2 3.11 0.24
 -5 -2 2 2.96 0.23
 -5 -2 -2 3.05 0.25
 5 -2 2 3.13 0.24
 5 2 -2 3.02 0.27
 5 -2 2 3.19 0.36
 5 2 -2 3 0.23
 5 -2 2 2.69 0.26
 -5 -3 2 73.5 4.39
 5 -3 -2 79.71 5.51
 5 3 2 74.49 5.47
 5 3 2 78.22 4.73
 5 3 -2 75.01 4.72
 -5 -3 -2 69.09 4.41
 5 -3 2 74.1 4.4
 5 -3 2 65.91 5.5
 5 -3 2 64.99 4.59
 5 3 -2 74.22 4.39
 5 4 2 5.29 0.52
 -5 -4 2 5.88 0.39
 5 4 2 6.56 0.49
 5 -4 -2 6.83 0.63
 5 -4 2 5.78 0.4
 -5 -4 -2 5.29 0.41
 5 -4 2 5.21 0.45
 5 4 -2 5.64 0.46
 5 -4 2 5.57 0.58
 -5 -5 2 23.16 1.42
 5 5 2 23.58 1.57
 5 5 2 22.54 1.79
 5 -5 2 24.62 1.43
 5 -5 2 23.18 1.84
 -5 -5 -2 19.61 1.43
 5 5 -2 24.14 1.55
 5 6 2 1.36 0.26
 -5 -6 2 1.63 0.16
 5 6 2 1.64 0.28
 5 6 -2 1.32 0.22
 -5 -6 -2 1.11 0.18
 5 -6 2 1.57 0.34
 -5 6 2 0.82 0.19
 5 7 2 20.71 1.52
 -5 -7 2 18.4 1.19
 5 7 2 19.74 1.37
 -5 7 -2 15.54 1.29
 5 7 -2 19.74 1.34
 5 -7 2 18.95 1.62
 -5 7 2 19.84 1.47
 5 8 2 0.11 0.21
 -5 8 -2 0.18 0.16
 5 8 2 -0.02 0.16
 -5 8 2 0.05 0.13
 5 8 -2 0.25 0.18
 5 -8 2 0.06 0.29
 5 9 2 5.35 0.57
 5 9 2 5.62 0.58
 -5 9 -2 5.6 0.5
 -5 9 2 5.41 0.52
 5 9 -2 5.22 0.54
 -5 9 2 5.24 0.53
 5 -9 2 6.04 0.8
 5 10 2 1.61 0.34
 5 10 2 1.54 0.32
 -5 10 -2 1.85 0.28
 5 -10 2 2.17 0.52
 -5 10 2 1.54 0.32
 5 10 -2 1.5 0.31
 5 -10 2 0.14 0.63
 5 11 2 20.63 1.48
 -5 11 -2 19.03 1.4
 5 -11 -2 17.86 2.81
 5 11 2 20.42 1.63
 -5 11 2 18.66 1.42
 5 -11 2 20.32 1.82
 5 11 -2 18.86 1.43
 5 -11 2 21.64 1.41
 5 12 2 1.89 0.37
 -5 12 -2 2.21 0.35
 5 -12 -2 1.11 0.64
 5 12 2 1.69 0.38
 5 -12 2 1.89 0.55
 5 12 -2 1.89 0.35
 5 -12 2 0.55 0.74
 5 -12 2 1.41 0.3
 -5 12 2 2.2 0.39
 5 13 2 18.71 1.63
 5 -13 -2 19.54 2.95
 5 13 2 19.34 1.49
 -5 13 -2 19.88 1.42
 5 13 -2 18.83 1.45
 -5 13 2 19.76 1.46
 5 -13 2 21.59 1.88
 5 -13 2 15.44 3.04
 5 -13 2 22.16 1.45
 5 14 2 0.42 0.3
 5 -14 -2 -0.07 0.51
 -5 14 -2 -0.02 0.22
 5 14 2 0.3 0.18
 5 -14 -2 -0.48 0.46
 5 -14 2 0.48 0.47
 -5 -14 -2 -0.15 0.43
 5 -14 2 0.24 0.6
 5 14 -2 0.06 0.23
 5 14 -2 0.2 0.17
 5 -14 2 0.15 0.22
 -5 14 2 0.3 0.24
 -5 -15 2 43.24 5.66
 5 -15 -2 51.53 5.88
 5 -15 -2 41.91 3.8
 5 15 2 43.91 2.63
 5 15 2 49.23 2.63
 5 15 2 44.56 3.11
 -5 15 2 45.51 3.08
 -5 -15 -2 42.37 5.6
 5 -15 2 36.2 5.83
 5 15 -2 48.84 2.63
 5 15 -2 43.83 2.63
 5 -15 2 48.99 3.04
 5 15 -2 42.55 2.92
 5 15 -2 42.35 3.06
 5 -15 2 42.49 3.72
 5 16 2 0.25 0.2
 -5 -16 2 0.01 0.46
 5 16 2 -0.12 0.27
 5 -16 -2 0.92 0.56
 5 16 2 0.32 0.2
 5 -16 -2 -0.27 0.55
 5 -16 2 0.17 0.67
 5 16 -2 0.11 0.21
 -5 -16 -2 0.13 0.49
 5 16 -2 0.41 0.21
 5 -16 2 0.27 0.5
 -5 16 2 0.2 0.27
 5 16 -2 0.04 0.18
 5 16 -2 0.69 0.29
 5 17 2 0.06 0.18
 5 -17 -2 0.58 0.6
 5 17 2 0.03 0.18
 5 17 2 0.04 0.29
 -5 -17 2 0.26 0.51
 5 -17 -2 0.67 0.55
 5 17 -2 0.17 0.19
 -5 17 2 -0.2 0.27
 5 -17 2 -0.22 0.55
 -5 -17 -2 0.02 0.49
 5 17 -2 0.4 0.2
 5 17 -2 0.22 0.25
 5 -17 2 0.04 0.43
 5 17 -2 0.15 0.21
 5 -18 -2 1.44 0.73
 5 18 2 2.44 0.35
 5 18 2 3.19 0.36
 -5 -18 2 2.18 0.76
 5 18 -2 2.39 0.36
 5 -18 2 1.61 0.79
 5 18 -2 2.35 0.34
 -5 -18 -2 1.62 0.68
 5 19 2 13.03 0.93
 5 -19 -2 15.69 2.38
 -5 -19 2 15.63 2.38
 5 19 2 13.77 0.93
 5 19 -2 14.62 0.94
 5 -19 2 11.57 2.35
 -5 -19 -2 11.85 2.19
 5 19 -2 15.15 0.95
 5 -20 -2 2.21 0.69
 -5 -20 2 1.43 0.62
 5 20 2 1.88 0.27
 5 20 2 2.33 0.34
 5 20 -2 2.1 0.32
 5 20 -2 1.87 0.27
 5 -20 2 1.23 0.65
 -5 -21 2 -0.16 0.42
 5 -21 -2 0.6 0.42
 5 21 2 -0.09 0.17
 5 21 2 0.25 0.17
 5 -21 2 0.4 0.48
 5 21 -2 0.11 0.17
 5 21 -2 0.14 0.17
 5 22 2 0.22 0.16
 5 22 2 -0.13 0.15
 5 22 -2 -0.06 0.16
 5 22 -2 0.08 0.16
 5 23 2 10.93 0.67
 5 23 2 9.1 0.66
 5 23 -2 8.99 0.66
 5 23 -2 10.65 0.66
 6 0 2 4.41 0.31
 6 0 2 3.97 0.3
 -6 0 -2 4.21 0.32
 6 0 -2 4 0.3
 6 1 2 1.16 0.15
 6 -1 -2 0.98 0.15
 -6 1 -2 1.21 0.16
 6 1 2 0.93 0.12
 -6 -1 -2 1.15 0.16
 6 -1 2 0.98 0.15
 6 -1 2 1.04 0.14
 6 1 -2 0.88 0.14
 6 -1 2 1.17 0.21
 6 -2 -2 0.98 0.16
 6 2 2 1.66 0.19
 6 -2 -2 1.41 0.28
 -6 -2 2 1.31 0.14
 6 2 2 1.47 0.16
 -6 -2 -2 1.05 0.17
 6 -2 2 1.2 0.18
 6 2 -2 1.34 0.16
 6 2 -2 1.32 0.2
 6 -2 2 1.74 0.28
 6 -2 2 1.17 0.15
 6 3 2 35.86 2.2
 6 3 2 32.78 2.05
 6 -3 -2 34.57 2.58
 -6 -3 2 32.85 2.04
 6 3 2 33.47 2.55
 6 3 -2 34.72 2.2
 6 -3 2 33.64 2.05
 -6 -3 -2 30.44 2.05
 6 3 -2 35 2.04
 6 -3 2 33.38 2.58
 6 -3 2 30.76 2.14
 6 4 2 0.53 0.16
 -6 -4 2 0.71 0.12
 6 -4 -2 0.54 0.22
 6 4 2 0.86 0.18
 6 -4 2 0.49 0.15
 6 4 -2 0.58 0.15
 6 4 -2 0.61 0.12
 6 -4 2 0.57 0.21
 -6 -4 -2 0.56 0.13
 6 -4 2 0.66 0.12
 -6 -5 2 4.9 0.34
 6 5 2 4.46 0.48
 6 5 2 5.22 0.45
 6 -5 -2 5.36 0.63
 6 -5 2 5.05 0.58
 6 -5 2 4.81 0.36
 6 5 -2 5.07 0.43
 -6 -5 -2 4 0.36
 6 -5 2 4.4 0.42
 -6 -6 2 8.88 0.6
 6 6 2 9.2 0.79
 6 6 2 9.81 0.75
 6 -6 -2 8.85 0.96
 6 -6 2 9.31 0.63
 6 -6 2 8.42 0.88
 6 6 -2 9.35 0.71
 6 -6 2 8.55 0.69
 6 -7 -2 9.99 1.11
 -6 -7 2 10.15 0.69
 6 7 2 10.79 0.9
 6 7 2 11.73 0.86
 6 -7 2 11.32 1.02
 6 7 -2 9.89 0.8
 -6 7 2 9.21 0.84
 6 -7 2 11.11 0.72
 6 -7 2 10.22 0.78
 6 -8 -2 1.56 0.56
 6 8 2 3.2 0.45
 6 8 2 3.04 0.39
 -6 8 -2 2.33 0.34
 6 -8 2 3.2 0.37
 6 8 -2 2.82 0.38
 6 -8 2 3.1 0.58
 6 9 2 7.34 0.68
 6 9 2 6.89 0.68
 -6 9 -2 5.98 0.59
 6 9 -2 6.81 0.63
 6 -9 2 6.82 0.87
 6 -9 2 7.74 0.62
 6 10 2 21.42 1.67
 -6 10 -2 19.59 1.43
 6 10 2 21.28 1.53
 6 -10 -2 19.75 2.85
 6 10 -2 18.93 1.46
 6 -10 2 21.11 1.85
 -6 10 2 18.72 1.46
 6 -10 2 22.14 1.44
 6 11 2 1.41 0.31
 6 11 2 2.05 0.4
 6 -11 -2 0.8 0.56
 6 -11 -2 1.11 0.59
 -6 11 -2 1.58 0.3
 6 11 2 0.93 0.31
 -6 11 2 1.4 0.31
 6 11 -2 1.57 0.31
 6 -11 2 1.49 0.51
 6 -11 2 0.98 0.27
 6 -11 2 0.45 0.67
 6 12 2 6.18 0.71
 6 -12 -2 7.15 1.69
 -6 12 -2 6.84 0.63
 6 -12 -2 7.44 1.17
 -6 12 2 6.5 0.66
 6 -12 2 7.25 0.65
 6 12 -2 6.82 0.67
 6 -12 2 6.67 0.97
 6 -13 -2 -0.41 0.52
 6 13 2 0.3 0.3
 6 -13 -2 0.04 0.57
 6 -13 2 0.21 0.23
 6 13 -2 0.24 0.22
 -6 13 2 0.11 0.23
 6 -13 2 0.17 0.69
 6 -13 2 -0.22 0.4
 -6 -14 2 0.95 0.28
 6 14 2 0.5 0.33
 6 14 2 0.66 0.2
 6 14 2 0.62 0.22
 6 -14 -2 0.59 0.64
 6 14 2 0.5 0.19
 6 -14 -2 0.49 0.64
 -6 -14 -2 0.09 0.26
 6 -14 2 0.65 0.47
 6 -14 2 0.62 0.69
 6 14 -2 0.44 0.29
 6 -14 2 0.56 0.28
 6 14 -2 0.52 0.2
 6 14 -2 0.32 0.22
 -6 14 2 0.65 0.29
 6 14 -2 0.56 0.21
 -6 -15 2 0.8 0.56
 6 15 2 1.11 0.25
 6 -15 -2 0.92 0.65
 6 -15 -2 1.26 0.72
 6 15 2 1.39 0.24
 6 15 2 1.22 0.37
 6 15 2 1.6 0.24
 6 15 -2 1.07 0.27
 6 15 -2 1.08 0.33
 6 -15 2 1.31 0.56
 6 -15 2 0.35 0.7
 6 15 -2 1.28 0.25
 -6 -15 -2 1.11 0.59
 6 -15 2 1.06 0.35
 -6 15 2 1.87 0.41
 6 15 -2 1.53 0.24
 6 16 2 0.46 0.19
 6 16 2 -0.06 0.29
 -6 -16 2 0.02 0.45
 6 16 2 0.3 0.21
 6 -16 -2 -0.38 0.48
 6 -16 -2 0.41 0.58
 6 16 2 0.36 0.2
 6 16 -2 0.05 0.26
 -6 -16 -2 -0.06 0.48
 6 16 -2 0.11 0.22
 6 -16 2 -0.02 0.65
 -6 16 2 0.47 0.32
 6 -16 2 -0.1 0.48
 6 16 -2 0.27 0.19
 6 16 -2 0.37 0.2
 6 -17 -2 0.11 0.52
 6 17 2 -0.15 0.29
 -6 -17 2 0.22 0.51
 6 -17 -2 0.16 0.53
 6 17 2 0.4 0.2
 6 17 2 0.46 0.21
 6 17 -2 0.18 0.19
 6 17 -2 0.18 0.19
 -6 17 2 0.11 0.28
 6 17 -2 -0.18 0.2
 6 -17 2 -0.12 0.48
 -6 -17 -2 -0.05 0.5
 6 -17 2 -0.27 0.62
 6 17 -2 0.22 0.27
 6 18 2 1.54 0.26
 6 18 2 1.29 0.26
 -6 -18 2 1.45 0.68
 6 -18 -2 1.14 0.68
 -6 -18 -2 1.32 0.66
 6 18 -2 1.64 0.26
 6 -18 2 0.38 0.66
 6 18 -2 1.2 0.29
 6 18 -2 1.96 0.29
 6 19 2 0.43 0.2
 6 19 2 0.6 0.2
 6 -19 -2 0.03 0.48
 -6 -19 2 -0.16 0.46
 6 19 -2 0.37 0.19
 6 19 -2 0.55 0.21
 -6 -19 -2 0.25 0.47
 6 -19 2 0.33 0.54
 -6 -20 2 0.81 0.55
 6 20 2 0.44 0.2
 6 -20 -2 0.56 0.49
 6 20 2 0.65 0.2
 6 20 -2 0.48 0.2
 6 20 -2 0.62 0.2
 6 -20 2 0.22 0.51
 6 21 2 0.28 0.18
 6 21 2 0.44 0.18
 -6 -21 2 0.21 0.46
 6 21 -2 0.36 0.18
 6 21 -2 0.23 0.16
 6 -21 2 0.28 0.45
 6 22 2 0 0.14
 6 22 2 0.03 0.15
 6 22 -2 0.05 0.16
 6 22 -2 -0.02 0.14
 6 23 2 1.14 0.19
 6 23 2 1.04 0.17
 6 23 -2 1.08 0.17
 6 23 -2 1.27 0.2
 7 0 -2 150.67 9.08
 7 0 -2 133.15 9.43
 7 0 2 144.78 9.44
 -7 0 -2 162.75 9.09
 7 0 2 165.02 9.09
 7 -1 -2 25.45 1.64
 7 1 2 24.62 1.68
 7 1 2 27.19 1.65
 -7 1 -2 26.95 1.65
 7 -1 -2 28.9 2.05
 7 -1 2 27.09 1.65
 7 -1 2 28.99 2.07
 7 1 -2 25.69 1.64
 7 -1 2 24.1 1.69
 -7 -1 -2 27.87 1.66
 7 -2 -2 0.28 0.11
 7 2 2 0.19 0.1
 -7 -2 2 0.27 0.08
 7 2 2 0.36 0.1
 7 -2 -2 0.35 0.17
 7 -2 2 0.15 0.09
 7 -2 2 0.06 0.09
 7 2 -2 0.08 0.1
 -7 -2 -2 0.05 0.1
 7 -2 2 0.32 0.17
 7 -3 -2 32.58 2.19
 7 3 2 35.83 2.2
 7 -3 -2 38.06 2.76
 -7 -3 2 35.55 2.18
 7 3 2 39.9 2.35
 7 -3 2 34.94 2.19
 7 -3 2 37.19 2.76
 -7 -3 -2 34.39 2.2
 7 -3 2 33.47 2.28
 7 3 -2 34.72 2.18
 7 3 -2 35.72 2.34
 -7 -4 2 63.14 3.89
 7 4 2 69.01 4.2
 7 -4 -2 70.01 4.91
 7 4 -2 63.44 3.9
 7 -4 2 61.15 4.08
 7 -4 2 62.01 4.89
 7 4 -2 63.09 4.18
 7 -4 2 62.69 3.91
 7 -5 -2 32.7 2.46
 7 5 2 34.06 2.09
 -7 -5 2 28.49 1.9
 7 -5 2 31.14 2.45
 7 -5 2 29.7 1.92
 7 -5 2 29.24 2.02
 7 5 -2 31.73 2.07
 -7 -6 2 3 0.26
 7 6 2 3.29 0.4
 7 6 2 2.9 0.4
 7 -6 -2 3.21 0.57
 7 -6 2 2.87 0.29
 7 6 -2 2.99 0.36
 7 -6 2 3.26 0.35
 7 -6 2 3.58 0.54
 7 -7 -2 52.53 4.13
 7 7 2 51.18 3.96
 7 7 2 54.25 3.48
 7 7 -2 51.6 3.44
 7 -7 2 51.32 3.35
 7 -7 2 50.34 4.06
 7 8 2 21.14 1.62
 7 -8 -2 19.83 1.85
 7 8 2 19.07 1.46
 7 -8 2 19.49 1.38
 7 -8 2 20.77 1.76
 7 8 -2 18.82 1.42
 7 9 2 0.24 0.21
 7 -9 -2 0.48 0.46
 -7 9 -2 0.15 0.19
 7 9 2 0.22 0.24
 7 -9 2 0.41 0.21
 7 9 -2 0.25 0.22
 7 -9 2 -0.1 0.55
 7 -9 2 0.5 0.37
 7 10 2 8.18 0.71
 7 -10 -2 7.17 1.13
 7 -10 -2 8.14 1.59
 -7 10 -2 7.32 0.67
 7 10 2 8.63 0.81
 7 10 -2 7.93 0.72
 -7 10 2 7.38 0.72
 7 -10 2 8.68 1.94
 7 -10 2 8.28 0.97
 7 -10 2 8.43 0.7
 7 11 2 57.71 3.91
 7 -11 -2 55.55 7.06
 -7 11 -2 59.84 3.81
 7 -11 -2 58.14 4.73
 7 -11 2 57.79 4.6
 7 -11 2 66.89 3.78
 7 -11 2 44 7.21
 -7 11 2 55.11 3.84
 7 11 -2 56.9 3.85
 7 12 2 37.55 2.7
 7 -12 -2 37.02 4.99
 7 -12 -2 39.74 3.37
 -7 12 2 37.03 2.64
 7 -12 2 44.4 3.26
 7 -12 2 44.1 2.61
 7 12 -2 35.31 2.64
 7 -12 2 29.78 5.17
 7 -13 -2 10.15 2.02
 7 -13 -2 12.03 1.4
 7 13 2 7.99 0.92
 7 13 2 10.95 0.71
 -7 -13 2 10.46 0.77
 7 13 -2 9.33 0.87
 -7 13 2 10.01 0.89
 7 13 -2 10.24 0.71
 -7 -13 -2 9.83 0.75
 7 -13 2 10.48 0.87
 7 -13 2 11.27 1.21
 7 -13 2 6.68 2.23
 7 -14 -2 15.44 2.62
 7 14 2 13.27 1.1
 -7 -14 2 15.52 1.04
 7 14 2 15.63 0.99
 7 14 2 15.08 0.99
 7 14 2 15.45 1.28
 7 -14 -2 17 1.77
 7 14 -2 14.45 1.12
 7 14 -2 14.87 1.21
 7 -14 2 13.05 2.85
 -7 14 2 15.73 1.22
 -7 -14 -2 14.75 1.03
 7 -14 2 19.24 1.24
 7 14 -2 14.27 0.99
 7 14 -2 15.29 1
 7 -14 2 16.64 1.61
 -7 -15 2 43.39 2.59
 7 15 2 43.06 2.57
 7 -15 -2 46.52 3.79
 7 15 2 46.8 2.57
 7 15 2 42.06 3.06
 7 -15 -2 48.01 5.76
 7 15 2 42.4 2.86
 7 15 -2 41.55 3.01
 -7 -15 -2 43.9 2.58
 7 15 -2 41.61 2.86
 -7 -15 -2 40.16 5.48
 7 15 -2 43.58 2.57
 7 -15 2 38.96 5.87
 -7 15 2 46.26 3.02
 7 -15 2 40.36 3.66
 7 15 -2 45.94 2.57
 -7 -16 2 21.36 3.02
 7 16 2 20.69 1.26
 7 16 2 20.14 1.25
 7 -16 -2 20.24 3.13
 7 16 2 18.62 1.4
 7 -16 -2 18.44 1.99
 7 16 2 19.18 1.55
 7 16 -2 18.73 1.5
 7 -16 2 17.48 1.91
 -7 -16 -2 20.7 2.93
 7 16 -2 21.44 1.27
 7 16 -2 20.52 1.41
 -7 16 2 19.73 1.52
 7 -16 2 16.03 3.18
 7 16 -2 20.07 1.25
 7 17 2 0.56 0.21
 7 17 2 0.53 0.35
 7 -17 -2 0.3 0.58
 7 -17 -2 0.45 0.61
 7 17 2 0.44 0.21
 -7 -17 2 0.27 0.52
 7 17 2 0.84 0.24
 7 17 -2 0.77 0.21
 7 -17 2 -0.36 0.6
 7 17 -2 0.64 0.31
 -7 -17 -2 0.5 0.57
 7 -17 2 0.34 0.51
 7 17 -2 0.71 0.22
 7 17 -2 0.49 0.24
 7 18 2 9.06 0.69
 7 -18 -2 10.17 1.96
 -7 -18 2 9.79 1.96
 7 18 2 9.87 0.71
 -7 -18 -2 9.01 1.86
 7 18 -2 9.27 0.78
 7 18 -2 9.65 0.71
 7 18 -2 10.08 0.7
 7 -18 2 7.26 1.97
 7 19 2 21.57 1.34
 7 -19 -2 19.89 3.09
 -7 -19 2 23.11 3.18
 7 19 2 22.5 1.34
 7 19 -2 21.18 1.34
 7 -19 2 18.31 3.15
 7 19 -2 21.21 1.49
 7 19 -2 22.12 1.34
 -7 -19 -2 20.08 3.03
 -7 -20 2 13.93 2.17
 7 -20 -2 13.28 2.11
 7 20 2 13.68 0.86
 7 20 2 12.74 0.87
 7 20 -2 13.34 0.86
 7 20 -2 12.15 0.86
 7 -20 2 10.39 2.12
 7 21 2 0.36 0.17
 7 21 2 0.32 0.18
 -7 -21 2 0.65 0.46
 7 -21 -2 1.29 0.51
 7 21 -2 0.49 0.18
 7 -21 2 0.48 0.43
 7 21 -2 0.25 0.16
 7 22 2 2.43 0.29
 7 22 2 2.71 0.3
 7 22 -2 2.41 0.3
 7 22 -2 2.28 0.29
 7 23 2 6.26 0.48
 7 23 2 7.18 0.47
 7 23 -2 6.56 0.48
 7 23 -2 6.9 0.47
 8 0 -2 3.17 0.27
 8 0 2 3.01 0.25
 8 0 2 3.3 0.28
 8 -1 -2 29.23 1.89
 8 -1 -2 35.87 2.36
 8 -1 -2 26.97 1.94
 8 1 2 31.74 1.89
 8 -1 2 29.1 1.94
 8 -1 2 31.4 1.89
 8 1 -2 30.25 1.89
 -8 -2 2 0.28 0.1
 8 -2 -2 0.19 0.11
 8 2 2 0.13 0.11
 8 -2 -2 0.32 0.17
 8 -2 2 0.25 0.11
 8 -2 2 0.24 0.17
 8 -2 2 0.24 0.11
 8 2 -2 0.2 0.1
 8 -3 -2 4.21 0.46
 8 3 2 3.85 0.32
 -8 -3 2 3.44 0.3
 8 -3 -2 3.23 0.31
 8 3 2 4.6 0.35
 8 -3 2 4.57 0.47
 8 -3 2 3.29 0.3
 8 -3 2 3.32 0.33
 8 3 -2 3.65 0.3
 8 -4 -2 0.07 0.2
 8 4 2 0.22 0.13
 8 -4 2 0.11 0.1
 8 -4 2 0.18 0.14
 8 4 -2 0.34 0.11
 8 -4 2 0.52 0.23
 8 4 -2 1.03 0.18
 8 -5 -2 0.04 0.24
 8 5 2 0.03 0.15
 8 -5 2 -0.08 0.2
 8 -5 2 -0.08 0.14
 8 5 -2 0.2 0.14
 8 6 2 2.33 0.34
 8 -6 -2 2.95 0.5
 8 -6 2 2.14 0.41
 8 6 -2 2.22 0.33
 8 -6 2 1.78 0.3
 8 -7 -2 4.25 0.71
 8 7 2 4.59 0.52
 8 -7 2 4.51 0.65
 8 -7 2 4.78 0.46
 8 7 -2 4.66 0.48
 8 -8 -2 2.65 0.59
 8 8 2 3.15 0.47
 8 -8 2 3.17 0.57
 8 8 -2 2.63 0.4
 8 -8 2 2.6 0.37
 -8 9 -2 1.85 0.34
 8 9 2 1.55 0.37
 8 -9 -2 1.93 0.56
 8 -9 -2 1.8 0.6
 8 9 2 1.99 0.33
 8 -9 2 2.09 0.35
 8 -9 2 2.05 0.53
 8 9 -2 2.26 0.36
 8 -9 2 0.88 0.67
 8 -10 -2 -0.19 0.48
 8 -10 -2 0.21 0.41
 8 10 2 0.22 0.24
 8 10 2 0.22 0.28
 8 -10 2 0.16 0.4
 8 10 -2 0.24 0.23
 8 -10 2 -0.18 0.57
 8 -10 2 0.01 0.2
 8 11 2 1.35 0.4
 8 -11 -2 1 0.6
 8 11 2 1.66 0.34
 8 -11 -2 1.31 0.63
 -8 11 2 1.11 0.31
 8 -11 2 1.74 0.33
 8 -11 2 1.73 0.58
 8 -11 2 0.56 0.66
 8 11 -2 0.98 0.32
 8 -12 -2 -0.14 0.58
 8 -12 -2 0.4 0.56
 8 12 2 0.45 0.35
 -8 12 2 0.21 0.27
 8 -12 2 0.5 0.5
 8 -12 2 0.05 0.25
 8 -12 2 0.42 0.71
 8 12 -2 0.23 0.24
 -8 -13 2 6.77 0.6
 8 -13 -2 9.01 1.88
 8 13 2 7.87 0.8
 8 -13 -2 7.73 1.16
 8 13 2 5.75 0.59
 8 13 2 7.01 0.53
 8 13 2 5.96 0.52
 8 13 -2 6.78 0.54
 8 13 -2 6.28 0.53
 8 13 -2 6 0.6
 8 -13 2 9.48 1.12
 -8 13 2 6.93 0.7
 8 -13 2 7.69 0.68
 -8 -13 -2 5.49 0.52
 -8 -13 -2 7.15 0.59
 8 -13 2 3.12 1.27
 8 13 -2 7.33 0.7
 8 14 2 3.26 0.38
 8 -14 -2 2.15 0.87
 -8 -14 2 2.84 0.44
 -8 -14 2 1.97 0.33
 8 14 2 3.42 0.42
 8 -14 -2 3.26 0.87
 8 14 2 3.64 0.38
 8 14 2 3.77 0.58
 -8 -14 -2 1.78 0.34
 8 14 -2 2.94 0.42
 8 14 -2 3.31 0.49
 8 -14 2 3.05 0.48
 8 14 -2 3.14 0.37
 8 -14 2 3.38 0.8
 -8 14 2 3.63 0.53
 -8 -14 -2 3.69 0.46
 8 -14 2 1.22 0.92
 8 14 -2 3.56 0.37
 8 15 2 0.09 0.2
 8 -15 -2 -0.21 0.51
 8 15 2 0.53 0.22
 8 -15 -2 0.37 0.64
 8 15 2 -0.03 0.19
 8 15 2 -0.31 0.28
 -8 -15 2 0.01 0.28
 8 -15 2 0.09 0.54
 -8 -15 -2 0.11 0.27
 8 -15 2 -0.14 0.7
 -8 15 2 -0.05 0.26
 8 15 -2 0.09 0.2
 8 15 -2 0.26 0.21
 8 15 -2 0.1 0.26
 8 15 -2 -0.08 0.2
 8 -16 -2 1.45 0.7
 -8 -16 2 0.96 0.57
 8 16 2 1.16 0.25
 8 -16 -2 0.03 0.57
 8 16 2 1.04 0.39
 8 16 2 1.37 0.25
 -8 -16 2 1.42 0.35
 8 16 2 0.74 0.26
 -8 -16 -2 1.17 0.33
 8 16 -2 0.72 0.23
 -8 -16 -2 0.51 0.57
 8 16 -2 0.65 0.23
 8 -16 2 1.04 0.61
 8 16 -2 0.92 0.26
 8 -16 2 0.4 0.8
 8 16 -2 0.82 0.31
 -8 16 2 0.5 0.34
 8 17 2 0.75 0.22
 8 17 2 0.6 0.25
 8 17 2 0.32 0.21
 -8 -17 2 -0.08 0.47
 8 -17 -2 -0.02 0.56
 8 17 -2 0.34 0.22
 8 -17 2 -0.23 0.65
 8 17 -2 0.29 0.21
 -8 -17 -2 0.33 0.54
 8 17 -2 0.21 0.2
 8 18 2 2.32 0.37
 8 18 2 2.35 0.4
 8 -18 -2 0.65 0.64
 -8 -18 2 1.8 0.75
 8 18 2 1.78 0.28
 8 18 -2 2.45 0.39
 8 18 -2 2.65 0.34
 -8 -18 -2 1.34 0.66
 8 -18 2 0.99 0.76
 8 18 -2 2.6 0.35
 8 19 2 3.59 0.46
 8 -19 -2 5.29 1.47
 8 19 2 4.21 0.41
 8 19 2 3.51 0.4
 -8 -19 2 5.13 1.39
 8 -19 2 2.11 0.89
 8 19 -2 3.62 0.39
 8 19 -2 3.38 0.39
 8 19 -2 3.42 0.45
 -8 -20 2 1.19 0.59
 8 -20 -2 1.54 0.61
 8 20 2 2.21 0.32
 8 20 2 2.45 0.32
 8 20 -2 1.65 0.31
 8 -20 2 0.89 0.57
 8 20 -2 1.55 0.24
 8 20 -2 2.38 0.31
 8 21 2 2.65 0.3
 8 21 2 1.84 0.29
 8 21 -2 2.41 0.28
 8 -21 2 1.12 0.54
 8 21 -2 2.3 0.3
 8 22 2 0.6 0.15
 8 22 2 0.66 0.17
 8 22 -2 0.69 0.17
 8 22 -2 0.51 0.15
 9 0 -2 99.69 6.24
 9 0 2 106.8 6.24
 9 -1 -2 2.57 0.25
 9 1 2 2.71 0.26
 9 -1 2 2.85 0.24
 9 1 -2 2.47 0.25
 9 -2 -2 0.88 0.16
 9 -2 -2 1.22 0.24
 9 -2 2 1.09 0.16
 9 -2 2 1.08 0.25
 9 2 -2 1.06 0.17
 9 -3 -2 1.96 0.37
 9 3 2 2.82 0.28
 9 3 -2 1.99 0.23
 9 -3 2 1.99 0.26
 9 -3 2 2.22 0.37
 9 -4 -2 141.05 10.04
 9 4 2 143.7 8.62
 9 4 -2 123.14 8.03
 9 -4 2 133.26 10.04
 9 4 -2 139.72 8.62
 9 -4 2 119.16 8.38
 9 -5 -2 0.29 0.25
 9 5 2 0.32 0.17
 9 -5 2 0.34 0.25
 9 5 -2 0.46 0.17
 9 -5 2 0.45 0.17
 9 -6 -2 14.21 1.24
 9 6 2 13.69 1
 9 -6 2 12.62 0.94
 9 6 -2 12.58 0.97
 9 -6 2 12.22 1.17
 9 7 2 7.72 0.66
 9 -7 -2 5.82 0.85
 9 -7 2 6.98 0.8
 9 7 -2 7.2 0.62
 9 -7 2 6.47 0.59
 9 -8 -2 68.01 7.85
 9 -8 -2 67.66 5.27
 9 8 2 64.68 4.43
 9 -8 2 70.17 7.98
 9 -8 2 66.44 4.28
 9 -8 2 65.2 5.19
 9 8 -2 62.3 4.39
 9 -9 -2 0.32 0.37
 9 9 2 0.06 0.28
 9 9 2 0.23 0.25
 9 -9 -2 0.08 0.46
 9 -9 2 0.47 0.23
 9 -9 2 0.05 0.46
 9 9 -2 0.21 0.23
 9 -9 2 0.08 0.38
 9 10 2 14.84 1.18
 9 -10 -2 14.21 1.68
 9 -10 -2 17.63 2.47
 9 10 2 15.57 1.28
 9 -10 2 16.29 2.64
 9 -10 2 17.2 1.18
 9 10 -2 14.51 1.2
 9 -10 2 13.45 1.52
 9 -11 -2 2.4 0.8
 9 -11 -2 2.86 0.81
 9 11 2 3.18 0.48
 9 11 2 2.66 0.52
 9 -11 -2 2.11 0.72
 9 -11 2 2.96 0.69
 9 11 -2 3.13 0.47
 9 -11 2 1.9 0.86
 9 -11 2 2.81 0.44
 -9 11 2 3.78 0.49
 9 -12 -2 50.04 4.53
 -9 -12 2 56.16 3.15
 9 12 2 51.17 3.09
 9 12 2 52.5 3.72
 9 -12 -2 49.25 6.67
 9 -12 2 60.55 3.58
 9 12 -2 54.37 3.11
 -9 -12 -2 55.02 3.14
 -9 12 2 51.02 3.63
 9 12 -2 49.14 3.64
 9 -12 2 58.95 4.46
 -9 -13 2 0.14 0.23
 9 -13 -2 0.51 0.69
 9 13 2 -0.11 0.2
 9 13 2 0.12 0.19
 9 -13 -2 -0.07 0.51
 9 13 2 0.21 0.2
 -9 -13 2 -0.14 0.25
 9 13 2 0.37 0.34
 9 13 -2 -0.04 0.2
 9 13 -2 -0.09 0.18
 -9 -13 -2 -0.05 0.23
 9 -13 2 0.09 0.24
 9 13 -2 0.05 0.2
 -9 13 2 -0.18 0.27
 9 -13 2 0.32 0.56
 9 13 -2 0.16 0.27
 9 -13 2 -0.32 0.69
 -9 -13 -2 0 0.26
 -9 -14 2 21.25 1.35
 9 -14 -2 22.68 1.58
 -9 -14 2 18.27 1.27
 9 14 2 20.31 1.28
 9 14 2 21.13 1.3
 9 14 2 21.28 1.66
 9 14 2 20.33 1.45
 9 -14 -2 18.98 3.18
 9 -14 -2 20.4 2.19
 9 -14 2 24.68 1.58
 -9 14 2 22.77 1.59
 9 14 -2 21.17 1.3
 9 14 -2 20.2 1.58
 9 14 -2 18.67 1.28
 -9 -14 -2 21.83 1.35
 9 -14 2 16.71 3.45
 9 14 -2 21.77 1.47
 9 -14 2 19.21 2.02
 -9 -14 -2 17.56 1.27
 9 15 2 -0.2 0.33
 9 15 2 0.05 0.2
 -9 -15 2 0.09 0.28
 9 -15 -2 -0.43 0.58
 9 15 2 -0.14 0.19
 9 15 2 -0.05 0.21
 9 -15 -2 -0.46 0.67
 9 15 -2 0.42 0.22
 9 15 -2 -0.23 0.2
 9 15 -2 0.33 0.23
 9 -15 2 -0.54 0.73
 9 15 -2 0.07 0.27
 9 -15 2 -0.04 0.53
 -9 -15 -2 0.04 0.27
 -9 15 2 0.67 0.36
 9 16 2 48.27 3.09
 9 16 2 41.57 3.28
 9 -16 -2 43.25 4.06
 9 16 2 48.46 2.77
 9 -16 -2 48.93 6.09
 -9 -16 2 45.89 2.79
 9 16 2 52.74 2.77
 9 16 -2 42.98 3.24
 9 16 -2 48.44 2.77
 -9 -16 -2 48.3 2.8
 9 -16 2 43.87 3.96
 9 16 -2 49.31 3.11
 -9 -16 -2 47.32 5.97
 9 -16 2 37.11 6.14
 9 16 -2 49.35 2.76
 9 -17 -2 0.87 0.73
 9 17 2 1.83 0.33
 -9 -17 2 1.52 0.71
 9 17 2 3.21 0.37
 9 17 2 3.73 0.4
 9 17 -2 2.84 0.37
 9 17 -2 2.62 0.35
 -9 -17 -2 2.17 0.37
 -9 -17 -2 1.3 0.69
 9 17 -2 2.98 0.41
 9 -17 2 -0.14 0.75
 9 -18 -2 11.8 2.26
 9 18 2 12.61 0.85
 9 18 2 12.55 0.85
 9 18 2 12.25 0.95
 -9 -18 2 15.13 2.29
 -9 -18 -2 12.66 2.19
 9 -18 2 9.72 2.31
 9 18 -2 12.09 0.95
 9 18 -2 11.37 0.83
 9 18 -2 12.15 0.85
 9 19 2 2.41 0.39
 9 19 2 2.52 0.33
 -9 -19 2 1.75 0.74
 9 19 2 2.81 0.34
 9 -19 -2 1.64 0.67
 9 19 -2 2.39 0.32
 9 19 -2 1.99 0.31
 9 -19 2 0.32 0.67
 9 19 -2 2.47 0.38
 9 20 2 31.99 1.79
 9 -20 -2 28.27 3.87
 -9 -20 2 30.12 4.02
 9 20 2 29.8 1.79
 9 -20 2 25.46 3.94
 9 20 -2 31.94 2.03
 9 20 -2 30.83 1.79
 9 20 -2 28.89 1.79
 9 21 2 0.21 0.15
 9 21 2 -0.15 0.14
 9 21 -2 -0.12 0.13
 9 21 -2 0.06 0.21
 9 21 -2 0.06 0.15
 9 22 2 17 1.01
 9 22 2 15.81 1.03
 9 22 -2 17.97 1.02
 9 22 -2 16.43 1.03
 10 -2 -2 0.1 0.17
 10 -2 2 0.05 0.11
 10 -3 -2 16.54 1.28
 10 -3 2 15.93 1.29
 10 -3 2 13.66 1.02
 10 -4 -2 7.18 0.63
 10 -4 -2 9.16 0.81
 10 4 2 9.02 0.64
 10 -4 2 7.32 0.61
 10 -4 2 8.36 0.79
 10 5 2 1.52 0.26
 10 -5 -2 1.27 0.35
 10 -5 2 1.7 0.37
 10 -5 2 1.28 0.23
 10 5 -2 1.8 0.3
 10 -6 -2 0.19 0.29
 10 6 2 0.31 0.19
 10 6 -2 0.62 0.21
 10 -6 2 0.25 0.29
 10 -6 2 0.14 0.17
 10 7 2 0.29 0.24
 10 7 2 0.28 0.22
 10 -7 -2 0.61 0.37
 10 -7 -2 0.46 0.3
 10 -7 2 0.41 0.33
 10 7 -2 0.32 0.21
 10 -7 2 0.32 0.2
 10 -7 2 0.59 0.32
 10 -8 -2 4.78 0.83
 10 8 2 4.88 0.58
 10 8 2 4.02 0.49
 10 -8 -2 5.01 1.21
 10 8 -2 4.8 0.53
 10 -8 2 4.67 0.71
 10 -8 2 4.29 0.48
 10 -8 2 3.92 1.28
 10 9 2 0.69 0.33
 10 9 2 0.05 0.26
 10 -9 -2 0.82 0.52
 10 -9 -2 0.86 0.47
 10 -9 2 1.1 0.48
 10 9 -2 0.94 0.29
 10 -9 2 1.16 0.54
 10 -9 2 0.93 0.27
 10 -10 -2 0.03 0.39
 10 -10 -2 0.53 0.6
 10 10 2 0.37 0.34
 10 10 2 0.05 0.28
 10 -10 -2 0.04 0.52
 10 -10 2 0.41 0.45
 10 10 -2 0.04 0.25
 10 -10 2 -0.09 0.61
 10 -10 2 0.1 0.22
 10 -10 2 0.28 0.53
 -10 -11 2 1.45 0.29
 10 -11 -2 0.36 0.65
 10 -11 -2 1.3 0.77
 10 11 2 0.84 0.39
 10 -11 -2 0.42 0.53
 -10 -11 -2 0.95 0.27
 10 -11 2 0.96 0.29
 10 -11 2 0.49 0.65
 10 -11 2 0.8 0.53
 10 11 -2 1.31 0.37
 -10 11 2 0.94 0.36
 10 -12 -2 1.24 0.34
 10 -12 -2 2.57 0.81
 10 12 2 0.87 0.23
 -10 -12 2 1.21 0.28
 10 -12 -2 2.09 0.84
 -10 -12 2 0.88 0.29
 10 12 2 0.98 0.24
 10 12 2 0.96 0.26
 10 -12 -2 0.56 0.62
 10 12 2 1.39 0.46
 10 12 -2 1.33 0.29
 -10 -12 -2 0.82 0.26
 10 -12 2 0.83 0.31
 10 12 -2 1.36 0.25
 -10 -12 -2 1.46 0.3
 -10 12 2 1.22 0.37
 10 -12 2 0.38 0.71
 10 -12 2 1.92 0.67
 10 12 -2 1.64 0.39
 10 12 -2 1.19 0.25
 10 13 2 0.6 0.22
 -10 -13 2 0.22 0.27
 10 -13 -2 0.31 0.78
 10 -13 -2 -0.21 0.55
 10 -13 -2 0.61 0.32
 10 13 2 0.31 0.19
 -10 -13 2 0.16 0.24
 10 13 2 0.34 0.4
 10 13 2 0.71 0.24
 10 -13 2 0.75 0.6
 10 13 -2 0.47 0.22
 10 -13 2 -0.34 0.7
 10 13 -2 -0.08 0.21
 10 13 -2 0.33 0.31
 -10 -13 -2 0.52 0.28
 -10 13 2 0.33 0.33
 10 -13 2 0.2 0.25
 10 13 -2 0.44 0.21
 -10 -13 -2 0.66 0.26
 10 14 2 0.8 0.43
 -10 -14 2 0.44 0.26
 10 -14 -2 1.01 0.83
 10 14 2 0.43 0.24
 -10 -14 2 0.61 0.3
 10 14 2 0.61 0.22
 10 -14 -2 0.12 0.61
 10 14 2 0.37 0.22
 -10 -14 -2 -0.31 0.26
 10 14 -2 0.59 0.23
 10 -14 2 1.46 0.68
 10 14 -2 0.5 0.22
 -10 -14 -2 0.32 0.3
 10 14 -2 0.43 0.25
 10 14 -2 0.36 0.3
 10 -14 2 -0.11 0.84
 10 -15 -2 0.32 0.75
 10 15 2 -0.06 0.35
 -10 -15 2 -0.17 0.23
 10 15 2 -0.18 0.21
 10 15 2 0.16 0.21
 -10 -15 2 0.03 0.28
 10 15 2 0.19 0.2
 10 -15 -2 -0.78 0.57
 10 15 -2 0.32 0.22
 10 15 -2 -0.26 0.19
 -10 -15 -2 -0.05 0.27
 10 -15 2 1.01 0.62
 10 15 -2 -0.04 0.28
 -10 -15 -2 0.51 0.27
 10 -15 2 -1.3 0.7
 10 15 -2 0.16 0.23
 -10 -16 2 0.06 0.3
 10 16 2 0.01 0.19
 10 -16 -2 -0.51 0.58
 10 16 2 0.47 0.22
 10 16 2 -0.29 0.21
 10 -16 -2 0.51 0.74
 10 16 -2 0.07 0.19
 10 -16 2 0.04 0.54
 10 16 -2 0.1 0.21
 -10 -16 -2 0.13 0.31
 10 -16 2 -0.74 0.66
 -10 -16 -2 0.28 0.54
 10 16 -2 0.18 0.24
 10 -17 -2 -0.07 0.63
 10 17 2 0.77 0.24
 -10 -17 2 0.69 0.31
 10 17 2 0.53 0.26
 10 17 2 0.74 0.24
 -10 -17 2 0.1 0.54
 10 -17 2 -0.86 0.62
 -10 -17 -2 -0.08 0.28
 10 17 -2 0.94 0.28
 10 17 -2 0.59 0.22
 -10 -17 -2 0.12 0.51
 10 17 -2 0.62 0.22
 10 18 2 0.65 0.22
 10 18 2 0.54 0.26
 10 -18 -2 -0.06 0.55
 -10 -18 2 0.71 0.57
 10 18 2 0.75 0.22
 10 18 -2 0.89 0.27
 10 18 -2 0.68 0.21
 -10 -18 -2 -0.09 0.54
 10 18 -2 0.44 0.2
 10 -18 2 -1.03 0.66
 10 19 2 0.39 0.18
 10 -19 -2 0.11 0.47
 10 19 2 0.3 0.25
 10 19 2 0.28 0.18
 -10 -19 2 0.36 0.55
 10 19 -2 0.38 0.17
 10 19 -2 0.48 0.19
 10 -19 2 -0.27 0.53
 10 19 -2 0.36 0.24
 10 20 2 -0.1 0.16
 10 20 2 -0.15 0.16
 10 20 2 -0.06 0.22
 -10 -20 2 0.22 0.47
 10 20 -2 0.47 0.23
 10 20 -2 0.2 0.16
 10 20 -2 0.11 0.16
 10 -20 2 0.2 0.46
 10 21 2 0.26 0.15
 10 21 -2 -0.06 0.2
 10 21 -2 0.06 0.15
 10 21 -2 0.11 0.13
 10 22 2 0.15 0.14
 10 22 -2 0.19 0.12
 11 -3 -2 32.12 2.57
 11 -3 2 33.34 2.58
 11 -4 -2 141.26 10.07
 11 -4 2 140.53 10.07
 11 -4 2 119.17 8.38
 11 -5 -2 13.2 1.15
 11 5 2 13.27 0.94
 11 5 2 10.72 0.94
 11 -5 -2 12.1 0.92
 11 -5 2 12.29 1.13
 11 -5 2 15.86 1.81
 11 -5 2 11.54 0.89
 11 -6 -2 13.23 1.64
 11 -6 -2 10.54 0.86
 11 6 2 9.77 0.86
 11 -6 -2 11.58 1.12
 11 6 2 12.31 0.89
 11 -6 2 10.38 1.07
 11 -6 2 12.41 1.77
 11 -6 2 10.33 0.84
 11 7 2 15.35 1.32
 11 -7 -2 18.36 1.66
 11 -7 -2 17.04 1.31
 11 -7 -2 20.12 2.48
 11 7 2 19.84 1.39
 11 -7 2 20.22 2.61
 11 -7 2 17.36 1.29
 11 7 -2 19.26 1.35
 11 -7 2 19.77 1.65
 11 -8 -2 76.8 5.03
 11 8 2 68.99 5.27
 11 -8 -2 77.07 6.13
 11 8 2 83.37 5.21
 11 -8 -2 78.84 9.2
 11 8 -2 79.3 5.17
 11 -8 2 80.63 6.1
 11 -8 2 73.53 5.01
 11 -8 2 85.81 9.34
 11 -9 -2 2.61 0.44
 11 -9 -2 3.08 0.74
 11 -9 -2 2.24 0.65
 11 -9 -2 3.35 0.68
 11 9 2 2.53 0.38
 11 9 2 2.52 0.48
 11 -9 2 2.72 0.41
 11 -9 2 2.22 0.74
 11 -9 2 3.03 0.61
 11 -9 2 2.69 0.65
 11 9 -2 2.85 0.48
 11 -10 -2 17.32 1.28
 11 10 2 15.87 1.38
 11 -10 -2 15.78 1.57
 -11 -10 2 16.58 1.11
 11 -10 -2 14.26 1.76
 11 10 2 15.98 1.27
 11 -10 -2 15.88 2.57
 11 -10 2 16.7 1.24
 11 -10 2 17.02 1.67
 11 10 -2 16.73 1.31
 11 -10 2 14 1.64
 -11 -10 -2 17.91 1.11
 11 -10 2 16.91 2.83
 11 11 2 26.2 1.81
 11 11 2 26.41 1.59
 11 -11 -2 22.2 2.56
 11 -11 -2 29.9 1.92
 -11 -11 2 25.65 1.6
 -11 -11 2 26.85 1.66
 11 11 2 23.84 2
 11 -11 -2 27.97 2.28
 11 -11 -2 25.42 3.7
 -11 -11 -2 27.08 1.6
 11 -11 2 25.9 2.35
 11 -11 2 23.77 3.93
 11 -11 2 28.77 1.88
 11 11 -2 24.42 1.81
 11 11 -2 25.95 1.6
 11 -11 2 26.44 2.43
 -11 -11 -2 28.82 1.66
 11 11 -2 24.65 1.94
 11 -12 -2 36.27 5.11
 11 12 2 38.57 2.86
 11 12 2 39.16 2.62
 11 -12 -2 42.45 3.19
 11 -12 -2 46.09 2.74
 -11 -12 2 44.26 2.4
 -11 -12 2 40.23 2.33
 11 -12 -2 34.12 3.54
 11 12 2 40.3 2.31
 11 12 2 34.6 2.3
 -11 -12 -2 39.55 2.32
 11 12 -2 33.55 2.31
 11 12 -2 38.29 2.61
 -11 -12 -2 42.16 2.37
 11 12 -2 40.34 2.32
 11 12 -2 38.4 2.77
 11 -12 2 30.51 5.35
 11 -12 2 37.41 3.39
 11 -12 2 44.38 2.7
 11 13 2 0.33 0.22
 11 13 2 0.06 0.22
 11 13 2 0.03 0.44
 -11 -13 2 0.02 0.28
 -11 -13 2 -0.07 0.25
 11 -13 -2 -0.33 0.3
 11 -13 -2 0.65 0.88
 11 13 2 0.11 0.23
 11 -13 -2 -0.61 0.54
 11 13 -2 -0.03 0.23
 11 -13 2 0.13 0.6
 -11 -13 -2 -0.01 0.27
 11 13 -2 -0.07 0.2
 11 -13 2 -0.1 0.27
 11 13 -2 0.18 0.23
 11 -13 2 -0.86 0.7
 -11 -13 -2 -0.42 0.24
 11 13 -2 0.13 0.3
 11 14 2 5.97 0.61
 11 -14 -2 3.54 1.19
 11 -14 -2 5.09 1.24
 11 14 2 6.45 0.84
 11 14 2 5.79 0.55
 -11 -14 2 6.38 0.55
 11 14 2 7.06 0.56
 -11 -14 2 6.7 0.64
 -11 -14 -2 7.16 0.63
 11 -14 2 5.48 1.05
 11 14 -2 6.61 0.73
 11 14 -2 6.59 0.54
 11 -14 2 3.03 1.43
 -11 -14 -2 5.78 0.55
 11 14 -2 5.75 0.55
 11 14 -2 6.83 0.63
 -11 -15 2 10.22 0.8
 -11 -15 2 9.24 0.71
 11 -15 -2 8.06 2.12
 11 -15 -2 7.65 1.48
 11 15 2 7.36 0.99
 11 15 2 9.01 0.71
 11 15 2 10.67 0.73
 11 15 2 10.76 0.84
 11 15 -2 11.02 0.85
 -11 -15 -2 8.81 0.73
 11 15 -2 9.33 0.71
 -11 -15 -2 10.56 0.8
 11 15 -2 9.2 0.93
 11 15 -2 9.04 0.71
 11 -15 2 9.65 1.33
 11 16 2 33.4 2.23
 11 16 2 32.09 1.96
 11 16 2 32.89 1.97
 11 -16 -2 27.21 4.46
 -11 -16 2 30.62 2.02
 11 16 -2 31.91 1.96
 11 16 -2 34.79 2.24
 -11 -16 -2 32.58 2.02
 11 16 -2 34.99 1.97
 11 17 2 2.66 0.39
 11 17 2 2.45 0.42
 11 -17 -2 0.62 0.79
 -11 -17 2 1.19 0.67
 -11 -17 2 1.94 0.37
 11 17 2 2.8 0.38
 -11 -17 -2 1.83 0.36
 -11 -17 -2 1.26 0.67
 11 17 -2 2.8 0.39
 11 17 -2 2.19 0.36
 11 -17 2 0.78 0.86
 11 17 -2 2.4 0.35
 -11 -18 2 20.1 2.73
 11 18 2 16.87 1.09
 11 18 2 16.79 1.24
 11 -18 -2 17.09 2.73
 11 18 2 17.62 1.07
 11 18 -2 17.27 1.23
 11 -18 2 12.9 2.8
 -11 -18 -2 15.17 1.12
 11 18 -2 16.81 1.07
 11 18 -2 16.53 1.08
 11 19 2 14.92 0.96
 11 -19 -2 14.26 2.34
 11 19 2 15.81 1.11
 -11 -19 2 16.58 2.47
 11 19 -2 15.03 0.94
 11 -19 2 9.4 2.38
 11 19 -2 13.7 0.95
 11 19 -2 16.27 1.11
 11 20 2 20.31 1.33
 11 20 2 23.67 1.52
 11 20 -2 20.58 1.33
 11 20 -2 23.58 1.52
 11 21 2 -0.13 0.13
 11 21 2 0.17 0.2
 11 21 -2 0.16 0.13
 11 21 -2 0.12 0.19
 12 0 2 0.14 0.17
 12 1 2 2.02 0.31
 12 -1 2 1.88 0.3
 12 2 2 0.29 0.2
 12 -2 -2 -0.43 0.36
 12 -3 -2 0.03 0.21
 12 -3 -2 0.56 0.31
 12 3 2 0.22 0.19
 12 3 -2 0.06 0.19
 12 -5 -2 1.56 0.38
 12 5 2 1.29 0.28
 12 5 -2 1.17 0.25
 12 -5 2 1.31 0.36
 12 -5 2 3.29 0.89
 12 6 2 0.85 0.24
 12 -6 -2 0.97 0.36
 12 -6 -2 1.22 0.4
 12 6 2 0.6 0.24
 12 -6 2 1.22 0.37
 12 -6 2 0.73 0.36
 12 -6 2 0.54 0.21
 12 7 2 15.04 1.07
 12 -7 -2 13.1 1.32
 12 7 2 11.74 1.01
 12 -7 -2 12.76 1.96
 12 -7 2 13.13 0.99
 12 -7 2 13.52 1.31
 12 -7 2 14.3 2.11
 12 -8 -2 3.98 0.63
 12 8 2 3.91 0.48
 12 -8 -2 3.89 0.75
 12 8 2 3.88 0.55
 12 -8 -2 4.41 0.51
 12 -8 -2 2.47 0.71
 12 -8 2 4.04 0.47
 12 -8 2 2.97 0.8
 12 -8 2 4.05 0.72
 12 -8 2 3.6 0.71
 12 8 -2 4.4 0.52
 12 -9 -2 2.64 0.67
 12 9 2 3.39 0.46
 12 9 2 4.44 0.62
 12 -9 -2 3.29 0.49
 12 -9 -2 2.79 0.74
 12 -9 -2 2.42 0.76
 12 -9 2 2.81 0.45
 12 -9 2 3.7 0.73
 12 -9 2 3.11 0.69
 12 -9 2 2.5 0.81
 12 9 -2 2.71 0.49
 12 -10 -2 0.12 0.63
 12 -10 -2 0.41 0.3
 12 -10 -2 -0.04 0.46
 -12 -10 2 0.15 0.23
 12 10 2 0.54 0.42
 12 -10 -2 0.55 0.6
 12 10 2 0.3 0.21
 12 10 2 0.1 0.3
 -12 -10 2 0.49 0.26
 12 10 2 0 0.22
 -12 -10 -2 0.1 0.23
 12 10 -2 -0.14 0.23
 12 -10 2 -0.59 0.61
 12 10 -2 0.07 0.28
 12 -10 2 0.26 0.26
 -12 -10 -2 0.33 0.22
 12 -10 2 -0.31 0.46
 12 10 -2 0.22 0.21
 12 -10 2 -0.2 0.55
 -12 -11 2 0.02 0.23
 12 -11 -2 -0.41 0.53
 12 11 2 0.4 0.4
 -12 -11 2 0.2 0.25
 12 11 2 0 0.2
 12 -11 -2 -0.33 0.29
 12 -11 -2 -0.15 0.63
 12 -11 -2 0.7 0.75
 12 11 2 -0.02 0.21
 12 -11 2 -0.2 0.24
 12 11 -2 0.44 0.26
 -12 -11 -2 0.56 0.27
 12 -11 2 0.16 0.72
 -12 -11 -2 0.2 0.24
 12 11 -2 0.07 0.21
 12 11 -2 -0.06 0.29
 12 -11 2 -0.9 0.57
 12 -11 2 0.14 0.57
 12 -12 -2 0.44 0.81
 12 12 2 1.01 0.28
 -12 -12 2 1.08 0.29
 12 12 2 0.84 0.24
 12 12 2 1.28 0.51
 12 -12 -2 -0.08 0.6
 -12 -12 2 0.68 0.3
 12 -12 -2 0.82 0.35
 12 -12 -2 1.18 0.81
 12 -12 2 0.78 0.34
 12 12 -2 1.41 0.43
 12 12 -2 0.91 0.28
 12 -12 2 -0.96 0.68
 -12 -12 -2 1.01 0.27
 12 12 -2 0.98 0.25
 12 -12 2 0.55 0.67
 -12 -12 -2 0.95 0.29
 12 13 2 0.74 0.24
 12 -13 -2 0.73 0.89
 12 13 2 1.09 0.28
 12 13 2 0.51 0.43
 12 -13 -2 -0.79 0.63
 -12 -13 2 0.65 0.3
 -12 -13 2 0.81 0.29
 12 -13 2 0.97 0.74
 -12 -13 -2 1 0.3
 -12 -13 -2 1.21 0.33
 12 -13 2 -0.75 0.79
 12 13 -2 0.85 0.29
 12 13 -2 1.97 0.48
 12 13 -2 0.76 0.24
 12 -14 -2 0.56 0.85
 -12 -14 2 0.39 0.3
 12 -14 -2 -0.46 0.66
 12 14 2 0.77 0.28
 12 14 2 0.65 0.24
 12 14 2 0.5 0.48
 -12 -14 2 0.54 0.28
 -12 -14 -2 0.82 0.32
 12 -14 2 0.76 0.72
 12 14 -2 0.74 0.29
 -12 -14 -2 0.69 0.28
 12 14 -2 0.53 0.23
 12 14 -2 0.56 0.38
 12 -14 2 -0.63 0.73
 12 -15 -2 -0.86 0.63
 -12 -15 2 -0.26 0.24
 12 15 2 0.15 0.22
 -12 -15 2 0.07 0.29
 12 15 2 0.12 0.25
 -12 -15 -2 -0.09 0.28
 12 15 -2 0.12 0.25
 12 -15 2 -0.24 0.84
 -12 -15 -2 0.26 0.29
 12 15 -2 0.33 0.22
 12 16 2 -0.05 0.21
 12 -16 -2 -0.2 0.69
 -12 -16 2 0.15 0.29
 12 16 2 -0.03 0.23
 -12 -16 -2 0.09 0.3
 12 16 -2 0.06 0.25
 -12 -16 -2 -0.27 0.28
 12 16 -2 0.08 0.21
 12 -16 2 -1.38 0.73
 12 17 2 0.67 0.26
 12 -17 -2 -0.29 0.64
 -12 -17 2 0.46 0.56
 -12 -17 2 0.4 0.29
 12 17 2 0.77 0.22
 -12 -17 -2 0.38 0.29
 12 17 -2 0.74 0.28
 12 17 -2 0.64 0.21
 -12 -17 -2 0.24 0.56
 -12 -18 2 -0.72 0.23
 12 18 2 -0.26 0.22
 -12 -18 2 -0.37 0.46
 12 -18 -2 -0.43 0.52
 12 18 2 -0.16 0.17
 12 18 -2 0.21 0.18
 12 -18 2 -0.75 0.66
 -12 -18 -2 0.02 0.26
 12 18 -2 -0.02 0.22
 -12 -19 2 0.09 0.49
 12 19 2 0.29 0.23
 12 19 2 0.29 0.17
 12 19 -2 0.3 0.17
 12 -19 2 -0.04 0.55
 12 19 -2 0.24 0.22
 12 20 2 0.11 0.15
 12 20 2 -0.25 0.2
 12 20 -2 -0.15 0.14
 12 20 -2 -0.04 0.19
 12 21 2 0.26 0.13
 12 21 2 0.35 0.2
 12 21 -2 0.25 0.19
 12 21 -2 0.09 0.12
 13 0 2 18.99 1.38
 13 1 2 88.4 6.04
 13 -1 2 98.25 10.54
 13 -1 2 92.33 6.05
 13 1 -2 81.7 6.03
 13 -2 -2 1.33 0.64
 13 2 2 2.75 0.35
 13 2 -2 2.24 0.35
 13 -2 2 1.72 0.55
 13 -3 -2 73.11 8.1
 13 3 2 68.68 4.65
 13 3 -2 60.87 4.63
 13 -3 2 73.52 8.06
 13 4 2 21.7 1.54
 13 -4 -2 22.3 2.89
 13 -4 -2 22.14 1.79
 13 4 -2 19.04 1.52
 13 -4 2 23.27 2.81
 13 -5 -2 61.72 4.47
 13 5 2 51.09 3.88
 13 -5 -2 57.16 6.79
 13 -5 2 57.92 6.8
 13 -5 2 58.86 4.47
 13 6 2 3.89 0.45
 13 -6 -2 3.99 1.16
 13 -6 -2 3.53 0.56
 13 -6 -2 3.37 0.59
 13 -6 2 3.64 0.6
 13 -6 2 3.84 0.74
 13 -6 2 4.2 1.2
 13 7 2 76.82 5.59
 13 -7 -2 95.25 6.5
 13 -7 -2 79.21 5.87
 13 -7 -2 81.17 9.71
 13 -7 2 84.84 9.79
 13 -7 2 81.23 5.9
 13 -7 2 83.12 6.43
 13 -8 -2 32.67 4.48
 13 -8 -2 37.07 3.06
 13 8 2 39.97 2.55
 13 -8 -2 34.36 2.74
 13 8 2 34.23 2.51
 13 -8 2 33.05 2.76
 13 -8 2 35.51 4.67
 13 -8 2 36.08 3
 13 -8 2 38.2 2.42
 13 -9 -2 15.8 1.62
 13 9 2 16.43 1.25
 13 -9 -2 13.79 2.31
 13 9 2 13.32 1.12
 -13 -9 2 15.67 1.04
 13 -9 -2 13.63 1.45
 13 9 2 13 1.07
 13 -9 2 14.47 2.6
 13 -9 2 16.91 1.53
 13 9 -2 11.86 1.08
 13 -9 2 14.63 1.52
 -13 -9 -2 15.66 1.02
 13 -9 2 13.88 1.11
 -13 -10 2 0.07 0.25
 13 10 2 0.41 0.3
 13 -10 -2 0.4 0.6
 13 10 2 -0.19 0.21
 -13 -10 2 -0.38 0.24
 13 -10 -2 -0.75 0.42
 13 10 2 -0.05 0.38
 13 -10 -2 0.43 0.7
 13 -10 2 0.32 0.28
 13 -10 2 -0.17 0.53
 13 10 -2 -0.02 0.26
 13 -10 2 -0.65 0.56
 13 -10 2 0.84 0.68
 -13 -10 -2 -0.13 0.23
 -13 -10 -2 0.39 0.25
 13 11 2 72.47 5.17
 13 -11 -2 87.28 5.27
 13 -11 -2 65.63 6.51
 13 11 2 77.43 5.48
 -13 -11 2 81.48 4.64
 13 -11 -2 84.17 5.88
 -13 -11 2 89.25 4.68
 13 -11 -2 71.92 9.66
 13 -11 2 82.99 5.94
 13 11 -2 74.4 5.18
 13 -11 2 78.33 6.46
 13 -11 2 87.71 5.25
 13 -11 2 74.14 9.95
 -13 -11 -2 88.49 4.66
 -13 -11 -2 81.42 4.63
 13 -12 -2 16.38 1.76
 -13 -12 2 13.61 0.96
 -13 -12 2 14.31 1.03
 13 12 2 12.98 0.94
 13 12 2 13.99 1.35
 13 12 2 13.42 1.08
 13 -12 -2 11.57 1.85
 13 12 -2 12.43 1.08
 -13 -12 -2 14.8 0.95
 13 12 -2 13.18 0.94
 13 -12 2 12.52 1.65
 -13 -12 -2 15.95 1.03
 13 12 -2 14.48 1.24
 -13 -13 2 2.5 0.42
 13 -13 -2 1.49 1
 13 13 2 2.79 0.44
 13 13 2 3.8 0.73
 13 13 2 3.01 0.49
 -13 -13 2 3.96 0.48
 13 13 -2 3.48 0.53
 13 -13 2 2.28 0.88
 -13 -13 -2 3.7 0.52
 13 13 -2 3.04 0.43
 -13 -13 -2 3.36 0.49
 13 13 -2 2.51 0.58
 13 14 2 1.18 0.28
 13 -14 -2 1.47 1.04
 13 14 2 1.68 0.35
 13 14 2 1.76 0.57
 -13 -14 2 1.53 0.38
 -13 -14 2 1.07 0.31
 13 -14 2 1.47 0.85
 -13 -14 -2 1.58 0.37
 13 14 -2 0.88 0.27
 13 14 -2 1.69 0.36
 13 -14 2 -0.49 0.93
 -13 -14 -2 1.73 0.32
 13 15 2 61.82 3.96
 13 -15 -2 50.15 7.56
 13 15 2 58.28 3.48
 -13 -15 2 60.53 3.57
 -13 -15 2 63.88 3.51
 -13 -15 -2 59.56 3.52
 13 15 -2 57.48 3.49
 -13 -15 -2 57.51 3.54
 13 15 -2 68.76 3.98
 13 16 2 4.27 0.51
 -13 -16 2 3.07 0.45
 13 -16 -2 1.39 0.93
 -13 -16 2 2.44 0.43
 13 16 2 3.57 0.41
 13 -16 2 0.5 1.05
 -13 -16 -2 2.75 0.38
 -13 -16 -2 3.85 0.52
 13 16 -2 3.86 0.49
 13 16 -2 3.62 0.41
 13 17 2 3.22 0.44
 13 17 2 1.7 0.26
 -13 -17 2 1.01 0.33
 13 -17 -2 0.5 0.7
 13 -17 2 -0.65 0.82
 13 17 -2 2.77 0.35
 -13 -17 -2 1.66 0.34
 13 17 -2 2.56 0.42
 13 -18 -2 10.82 1.97
 13 18 2 9.77 0.73
 13 18 2 11.75 0.89
 -13 -18 2 10.17 0.81
 -13 -18 2 13.89 2.09
 13 18 -2 10.02 0.74
 -13 -18 -2 9.72 0.8
 13 18 -2 11.89 0.88
 13 19 2 46.12 2.84
 13 19 -2 46.47 2.84
 13 19 -2 56.09 3.24
 13 20 2 2.27 0.29
 13 20 2 2.61 0.41
 13 20 -2 3.66 0.39
 13 20 -2 2.13 0.27
 14 0 2 2.7 0.37
 14 0 -2 2.9 0.38
 14 1 2 0.48 0.21
 14 -1 2 0.61 0.21
 14 1 -2 0.68 0.22
 14 2 2 -0.21 0.19
 14 -2 2 -0.42 0.56
 14 2 -2 0.01 0.18
 14 -2 2 0.06 0.19
 14 -3 -2 0.68 0.61
 14 3 2 0.88 0.24
 14 3 -2 0.4 0.22
 14 -3 2 0.39 0.5
 14 4 2 0.09 0.2
 14 -4 -2 0.02 0.36
 14 -4 -2 -0.07 0.48
 14 4 -2 0.07 0.21
 14 -4 2 0.09 0.43
 14 -5 -2 0.48 0.49
 14 -5 -2 0.62 0.33
 14 -5 -2 0.75 0.42
 14 5 2 0.12 0.24
 14 5 -2 0.16 0.23
 14 -5 2 0.43 0.44
 14 -5 2 0.16 0.45
 14 -6 -2 0.68 0.54
 14 -6 -2 1.88 0.47
 14 -6 -2 1.91 0.45
 14 6 2 1.6 0.31
 14 -6 2 1.97 0.47
 14 6 -2 1.57 0.47
 14 -6 2 2.01 0.55
 14 -6 2 0.73 0.5
 14 7 2 4.97 0.52
 14 -7 -2 4.39 0.84
 14 -7 -2 4.88 0.76
 -14 -7 2 4.22 0.49
 14 -7 -2 2.99 0.8
 14 -7 2 2.99 0.84
 14 -7 2 4.47 0.73
 14 -7 2 5.14 0.89
 -14 -7 -2 4.85 0.49
 14 -8 -2 0.74 0.56
 14 8 2 2.52 0.45
 -14 -8 2 0.73 0.27
 14 -8 -2 2.16 0.63
 -14 -8 2 1.18 0.32
 14 8 2 2.25 0.36
 14 -8 -2 1.31 0.56
 14 8 -2 1.78 0.37
 14 -8 2 1.18 0.61
 14 -8 2 2.19 0.63
 -14 -8 -2 1.9 0.33
 14 -8 2 2.91 0.64
 14 -9 -2 0.17 0.56
 14 -9 -2 -0.77 0.4
 -14 -9 2 0.35 0.25
 14 -9 -2 0.42 0.63
 -14 -9 2 -0.06 0.25
 14 9 2 0.5 0.3
 14 9 2 0.14 0.24
 14 -9 2 0.17 0.48
 14 9 -2 0.29 0.3
 14 -9 2 -0.78 0.53
 14 -9 2 0.13 0.59
 -14 -9 -2 -0.07 0.24
 -14 -9 -2 0.35 0.26
 -14 -10 2 5.49 0.54
 14 10 2 4.18 0.55
 -14 -10 2 4.95 0.51
 14 10 2 4.39 0.62
 14 -10 -2 3.59 1.02
 14 -10 -2 3.96 0.88
 14 -10 2 6.58 1.18
 14 10 -2 3.73 0.58
 -14 -10 -2 5.32 0.54
 -14 -10 -2 5.08 0.5
 14 -10 2 4.79 0.96
 14 -10 2 2.8 1.07
 14 11 2 0.23 0.26
 -14 -11 2 -0.24 0.25
 14 -11 -2 0.38 0.84
 -14 -11 2 -0.21 0.27
 14 -11 -2 1.2 0.7
 -14 -11 -2 -0.24 0.23
 14 -11 2 0.26 0.76
 -14 -11 -2 -0.26 0.24
 14 -11 2 -0.64 0.56
 14 11 -2 0.09 0.28
 14 -12 -2 0.88 0.82
 14 12 2 1.34 0.59
 -14 -12 2 1.45 0.34
 14 -12 -2 -0.03 0.95
 14 12 2 1.55 0.36
 -14 -12 2 1.93 0.32
 14 12 -2 1.52 0.37
 -14 -12 -2 1.65 0.35
 14 -12 2 2.03 0.86
 -14 -12 -2 1.55 0.31
 14 13 2 0.16 0.28
 -14 -13 2 -0.03 0.26
 14 -13 -2 -0.06 0.97
 -14 -13 2 -0.31 0.28
 14 13 2 -0.04 0.51
 14 13 -2 -0.01 0.27
 14 -13 2 -0.68 0.72
 -14 -13 -2 -0.1 0.27
 -14 -13 -2 0.29 0.28
 -14 -14 2 -0.29 0.27
 14 14 2 0.25 0.28
 -14 -14 2 0.29 0.31
 -14 -14 -2 -0.13 0.28
 14 14 -2 0.14 0.29
 -14 -14 -2 0.36 0.28
 14 15 2 0.55 0.3
 -14 -15 2 0.18 0.31
 -14 -15 2 -0.4 0.25
 -14 -15 -2 0.15 0.29
 -14 -15 -2 0.11 0.3
 14 15 -2 0.42 0.25
 14 15 -2 0.48 0.3
 -14 -16 2 2.5 0.41
 14 16 2 3.29 0.5
 -14 -16 2 3.94 0.46
 -14 -16 -2 2.44 0.37
 14 16 -2 3.36 0.41
 -14 -16 -2 3.48 0.51
 14 16 -2 3.59 0.5
 -14 -17 2 0.9 0.29
 14 17 2 1.32 0.32
 14 -17 -2 -0.01 0.58
 -14 -17 -2 0.9 0.3
 14 17 -2 1.03 0.23
 14 17 -2 1.22 0.31
 14 -17 2 -0.41 0.74
 -14 -18 2 1.33 0.63
 14 18 2 1.7 0.32
 -14 -18 2 1.21 0.3
 14 18 -2 0.75 0.2
 14 -18 2 -0.42 0.59
 14 18 -2 2.02 0.33
 -14 -18 -2 0.91 0.29
 14 19 2 -0.05 0.2
 14 19 -2 0.17 0.21
 14 20 2 -0.06 0.18
 14 20 -2 0.21 0.18
 15 0 2 9.24 0.79
 15 0 -2 12.43 1.03
 15 0 -2 8.24 0.77
 15 -1 -2 54.4 4.18
 15 1 2 63.49 4.19
 15 -1 -2 69.48 4.41
 15 -1 2 61.61 4.19
 15 1 -2 54.61 4.17
 15 1 -2 67.54 4.4
 15 2 2 2.49 0.39
 15 -2 -2 2.18 0.45
 15 2 -2 1.46 0.3
 15 2 -2 3.45 0.65
 15 -2 2 2 0.33
 15 -2 2 2.63 0.49
 15 -3 -2 72.34 4.86
 15 3 2 63.61 4.6
 15 -3 2 67.58 4.84
 15 -3 2 67.72 4.63
 15 -3 2 79.63 8.3
 15 3 -2 60.34 4.59
 15 3 -2 68.35 4.83
 15 -4 -2 1.09 0.76
 15 4 2 0.24 0.24
 15 -4 -2 0.86 0.43
 15 -4 2 1.04 0.45
 15 4 -2 0.12 0.23
 15 -4 2 0.48 0.62
 15 4 -2 0.5 0.43
 15 5 2 50.67 3.61
 15 -5 -2 57 6.6
 15 -5 -2 54 3.85
 15 5 -2 45.36 3.59
 15 -5 2 54.36 3.86
 15 -5 2 56.61 6.54
 15 5 -2 54.11 3.82
 -15 -6 2 -0.02 0.25
 15 6 2 -0.06 0.24
 15 -6 -2 0.12 0.63
 15 -6 -2 0.18 0.43
 -15 -6 -2 0.28 0.25
 15 -6 2 -0.73 0.53
 15 -6 2 0.29 0.49
 15 -7 -2 76.56 5.37
 15 -7 -2 82.11 5.89
 15 7 2 65.79 4.79
 15 7 2 75.65 5.07
 -15 -7 2 78.73 4.33
 15 -7 -2 77.19 9.04
 15 7 -2 63.61 4.8
 15 -7 2 74.85 5.38
 -15 -7 -2 76.55 4.31
 15 -7 2 76.73 8.99
 15 -8 -2 8.54 2.56
 -15 -8 2 12.99 0.88
 15 -8 -2 15.24 1.48
 15 -8 -2 14.74 1.4
 -15 -8 2 14.78 0.97
 15 8 2 13.1 1.04
 15 8 2 13.05 1.02
 15 -8 2 13.09 1.43
 -15 -8 -2 12.34 0.93
 15 -8 2 9.12 1.9
 -15 -8 -2 12.39 0.87
 15 -8 2 14.89 1.42
 15 8 -2 11.1 1.02
 15 -9 -2 29.22 2.6
 15 9 2 28.15 2.01
 -15 -9 2 28.61 1.76
 -15 -9 2 29.65 1.71
 15 -9 -2 22.3 3.98
 15 9 2 26.53 1.92
 15 -9 -2 31.4 2.38
 -15 -9 -2 28.33 1.75
 15 -9 2 20.06 4.05
 -15 -9 -2 28.87 1.7
 15 -9 2 31.31 2.44
 15 -9 2 26.67 2.51
 15 9 -2 24.32 1.92
 -15 -10 2 0.66 0.29
 -15 -10 2 0.56 0.3
 15 -10 -2 -0.2 0.68
 15 -10 -2 0.75 0.67
 15 10 2 0.45 0.29
 15 10 -2 0.44 0.32
 -15 -10 -2 0.26 0.27
 -15 -10 -2 0.61 0.27
 15 -10 2 0.89 0.73
 15 -10 2 0.38 0.63
 15 11 2 68.99 4.7
 15 -11 -2 76.54 5.39
 -15 -11 2 75.29 4.24
 -15 -11 2 75.11 4.2
 15 11 -2 63.92 4.7
 -15 -11 -2 73.55 4.19
 15 -11 2 73.83 5.43
 -15 -11 -2 77.91 4.23
 15 -11 2 62.46 5.86
 -15 -12 2 10.61 0.79
 15 -12 -2 6.95 1.54
 15 12 2 9.64 0.9
 -15 -12 2 11.14 0.87
 15 -12 -2 11.46 1.61
 -15 -12 -2 10.89 0.86
 15 -12 2 10.27 1.51
 -15 -12 -2 10.08 0.78
 15 12 -2 10.38 0.93
 -15 -13 2 4.87 0.61
 -15 -13 2 5.69 0.57
 15 13 2 6.01 0.66
 -15 -13 -2 5.37 0.58
 -15 -13 -2 4.62 0.6
 15 13 -2 5.48 0.64
 15 14 2 2.53 0.42
 -15 -14 2 2.16 0.35
 -15 -14 2 1.3 0.37
 -15 -14 -2 2.33 0.35
 15 14 -2 1.61 0.38
 -15 -14 -2 2.31 0.39
 15 15 2 77.43 4.79
 -15 -15 2 75.14 4.24
 -15 -15 2 67.46 4.27
 15 15 -2 75 4.78
 -15 -15 -2 69.64 4.27
 -15 -15 -2 73.99 4.26
 -15 -16 2 6.68 0.57
 -15 -16 2 4.92 0.6
 15 16 2 7.08 0.67
 15 16 -2 7.13 0.66
 -15 -16 -2 5.5 0.61
 -15 -16 -2 5.7 0.57
 15 17 2 0.87 0.28
 15 -17 -2 0.49 0.69
 -15 -17 2 -0.02 0.25
 -15 -17 -2 0.07 0.26
 15 17 -2 0.54 0.27
 15 -17 2 -0.26 0.75
 15 18 2 0.89 0.26
 -15 -18 2 0.68 0.25
 -15 -18 -2 0.16 0.24
 15 18 -2 0.32 0.23
 15 19 -2 48.41 2.8
 -15 -19 -2 37.07 2.47
 15 20 -2 0.38 0.18
 16 0 2 -0.04 0.41
 16 0 2 -0.34 0.22
 16 0 -2 0.17 0.37
 16 0 -2 -0.22 0.2
 16 -1 -2 0.1 0.21
 16 -1 -2 0.73 0.43
 16 1 2 0.04 0.23
 16 -1 2 0.56 0.42
 16 1 -2 0.05 0.21
 16 -1 2 0.84 0.26
 16 1 -2 0.09 0.4
 16 -2 -2 0.06 0.22
 16 -2 -2 0.26 0.4
 16 2 2 0.07 0.23
 16 2 -2 0.11 0.22
 16 -2 2 0.21 0.24
 16 2 -2 0.48 0.42
 16 -2 2 0.43 0.42
 16 3 2 6.55 0.62
 16 -3 -2 8.96 0.93
 16 3 -2 6.28 0.89
 16 3 -2 5.35 0.6
 16 -3 2 7.03 0.93
 16 -3 2 6.49 0.64
 16 4 2 1.42 0.3
 16 -4 -2 1.6 0.5
 16 4 -2 0.75 0.26
 16 -4 2 1.03 0.28
 16 4 -2 1.5 0.48
 16 -4 2 1.09 0.52
 16 -4 2 1.48 0.91
 16 -5 -2 2.22 0.54
 16 5 2 2.44 0.44
 16 5 -2 2.28 0.55
 16 5 -2 2.52 0.42
 16 -5 2 1.92 0.95
 16 -5 2 2.94 0.63
 16 -6 -2 10.5 2.93
 -16 -6 2 3.07 0.47
 16 6 2 3.8 0.5
 16 -6 -2 3.61 0.63
 16 6 2 3.15 0.53
 16 -6 2 4.35 0.78
 16 -6 2 2.87 1.06
 16 7 2 2.82 0.44
 16 -7 -2 2.7 1.09
 16 7 2 2.85 0.49
 -16 -7 2 3.04 0.47
 16 -7 -2 3.74 0.67
 -16 -7 -2 3.17 0.47
 16 -7 2 3.93 0.73
 16 -7 2 2.6 1.06
 16 7 -2 2.47 0.43
 16 -8 -2 0.72 0.6
 16 8 2 0.52 0.31
 16 8 2 1.52 0.34
 -16 -8 2 0.83 0.28
 -16 -8 2 0.82 0.3
 16 -8 -2 0.66 0.6
 16 -8 -2 0.57 0.94
 -16 -8 -2 0.87 0.28
 16 8 -2 0.48 0.33
 16 -8 2 -0.23 0.93
 -16 -8 -2 0.93 0.28
 16 -8 2 0.49 0.63
 16 -9 -2 -1.01 0.95
 16 -9 -2 0.28 0.68
 16 -9 -2 0.58 0.67
 16 9 2 -0.04 0.3
 16 9 2 -0.07 0.28
 -16 -9 2 0.12 0.27
 -16 -9 2 0.18 0.26
 -16 -9 -2 -0.23 0.25
 -16 -9 -2 0.61 0.27
 16 -9 2 1.01 0.7
 16 9 -2 -0.32 0.28
 16 -10 -2 -2.15 0.95
 16 -10 -2 -0.03 0.77
 16 10 2 -0.24 0.27
 16 -10 -2 0.34 0.69
 -16 -10 2 -0.23 0.26
 -16 -10 2 0.17 0.28
 16 10 -2 0.12 0.3
 16 -10 2 0.43 0.7
 16 -10 2 0.67 0.7
 -16 -10 -2 0.03 0.26
 -16 -10 -2 0.18 0.27
 -16 -11 2 0.75 0.3
 -16 -11 2 0.83 0.31
 16 -11 -2 2.34 0.87
 16 -11 -2 2.01 1
 16 -11 -2 -1.67 1.03
 16 11 2 1.62 0.38
 16 11 -2 1.26 0.37
 -16 -11 -2 1.4 0.31
 16 -11 2 0.81 0.8
 -16 -11 -2 1.31 0.34
 16 -11 2 1.57 0.77
 -16 -12 2 1.99 0.39
 16 -12 -2 3.11 0.94
 -16 -12 2 2.21 0.36
 16 12 2 2.53 0.45
 16 12 -2 1.62 0.42
 -16 -12 -2 1.91 0.34
 -16 -12 -2 2.33 0.39
 16 13 2 0.99 0.36
 -16 -13 2 0.89 0.31
 -16 -13 2 1.17 0.35
 16 13 -2 0.86 0.37
 -16 -13 -2 1.11 0.32
 -16 -13 -2 1.19 0.32
 -16 -14 2 0.66 0.3
 -16 -14 2 0.68 0.31
 16 14 2 1.04 0.34
 -16 -14 -2 0.99 0.3
 -16 -14 -2 0.42 0.3
 16 14 -2 0.3 0.33
 -16 -15 2 0.25 0.27
 -16 -15 2 0.33 0.24
 16 15 2 -0.26 0.26
 16 15 -2 0.3 0.29
 -16 -15 -2 0.21 0.27
 -16 -15 -2 0.03 0.27
 -16 -16 2 0.61 0.27
 -16 -16 2 1.1 0.27
 16 16 2 0.52 0.29
 16 -16 -2 -1.67 0.97
 -16 -16 -2 0.65 0.27
 -16 -16 -2 0.79 0.27
 16 -16 2 -1.54 0.86
 16 16 -2 0.85 0.28
 16 17 2 0.13 0.25
 -16 -17 2 0.16 0.23
 -16 -17 -2 0.31 0.24
 16 17 -2 0.21 0.24
 -16 -18 2 -0.16 0.2
 16 18 2 -0.01 0.2
 -16 -18 -2 -0.29 0.2
 16 18 -2 -0.07 0.2
 16 19 2 -0.15 0.18
 16 19 -2 0.26 0.18
 17 0 -2 50.53 3.48
 17 0 2 49.3 3.46
 17 0 2 48.1 3.27
 17 0 -2 41.57 3.24
 17 1 2 16.15 1.23
 17 -1 -2 16.64 1.45
 17 -1 -2 14.6 1.23
 17 -1 2 16.46 1.46
 17 -1 2 16.4 1.23
 17 1 -2 16.99 1.44
 17 1 -2 14.71 1.21
 17 -2 -2 0.82 0.49
 17 -2 -2 0.71 0.28
 17 2 2 0.42 0.27
 17 2 -2 0.47 0.26
 17 2 -2 0.93 0.47
 17 -2 2 1.48 0.5
 17 -2 2 1.03 0.3
 17 -3 -2 17.23 1.34
 17 3 2 16.44 1.3
 17 -3 -2 19.16 1.56
 17 -3 2 17.4 1.54
 17 -3 2 18.08 1.35
 17 3 -2 18.4 1.53
 17 3 -2 15 1.27
 17 4 2 59.5 4.14
 17 -4 -2 64.01 4.42
 17 -4 2 63.81 4.42
 17 -4 2 60.76 4.16
 17 4 -2 52.77 4.11
 17 4 -2 63.48 4.38
 17 -5 -2 18.62 1.62
 17 5 2 17.19 1.32
 17 -5 2 18.04 1.36
 17 -5 2 16.71 1.58
 17 5 -2 16.64 1.56
 17 5 -2 16.15 1.3
 17 6 2 3.79 0.56
 17 6 2 3.81 0.54
 17 -6 -2 4.31 0.72
 -17 -6 2 3.11 0.51
 17 -6 2 11.91 3.57
 17 -6 2 4.99 0.63
 17 -6 2 3.87 0.75
 17 7 2 44.74 3.08
 -17 -7 2 43.02 2.65
 17 -7 -2 45.09 3.38
 17 7 2 38.78 2.92
 17 -7 2 50.75 6.54
 -17 -7 -2 44.72 2.64
 17 -7 2 45.62 3.42
 17 8 2 78.11 5.38
 17 -8 -2 85.44 6.04
 -17 -8 2 80.12 4.82
 17 -8 -2 98.99 10.72
 -17 -8 2 80.8 4.81
 17 8 2 80.34 5.66
 17 8 -2 73.84 5.38
 -17 -8 -2 82.44 4.81
 17 -8 2 100.82 10.72
 17 -8 2 86.64 6.07
 17 -9 -2 5.22 1.74
 17 -9 -2 7.75 1.27
 -17 -9 2 7.38 0.68
 -17 -9 2 6.39 0.61
 17 9 2 7.13 0.73
 17 9 2 6.22 0.75
 17 -9 2 8.06 1.32
 -17 -9 -2 6.55 0.66
 -17 -9 -2 7.38 0.62
 17 -9 2 4.66 1.82
 17 9 -2 5.8 0.77
 17 -10 -2 6.89 1.93
 -17 -10 2 8.1 0.67
 17 10 2 7.52 0.81
 -17 -10 2 7.71 0.72
 17 -10 -2 9.06 1.38
 -17 -10 -2 8.39 0.73
 17 -10 2 4.37 2.05
 17 -10 2 7.85 1.47
 -17 -10 -2 8.29 0.67
 17 10 -2 6.55 0.82
 17 -11 -2 25.87 5.51
 17 11 2 25.56 1.98
 17 -11 -2 31.16 2.55
 -17 -11 2 28.01 1.74
 -17 -11 2 28 1.79
 -17 -11 -2 28.23 1.73
 -17 -11 -2 29.11 1.78
 17 11 -2 26.11 2
 -17 -12 2 49.35 2.79
 17 -12 -2 31.05 7.07
 -17 -12 2 48.41 2.84
 17 -12 -2 46.03 3.74
 17 12 2 44.66 3.16
 -17 -12 -2 48.58 2.83
 -17 -12 -2 52.86 2.8
 17 12 -2 42.36 3.15
 17 13 2 0.7 0.35
 -17 -13 2 0.06 0.28
 -17 -13 2 0.47 0.29
 17 -13 -2 -3.96 1.73
 -17 -13 -2 0.19 0.28
 -17 -13 -2 0.39 0.29
 17 13 -2 0.81 0.37
 17 14 2 11.79 1.01
 -17 -14 2 11.31 0.92
 -17 -14 2 11.76 0.87
 17 14 -2 12.06 1.02
 -17 -14 -2 12.03 0.92
 -17 -14 -2 13.05 0.88
 -17 -15 2 21.87 1.34
 17 15 2 22.68 1.55
 17 -15 -2 12.92 4.45
 -17 -15 2 20.2 1.39
 -17 -15 -2 19.97 1.34
 17 15 -2 23.5 1.56
 -17 -15 -2 20.96 1.39
 17 16 2 30.82 1.85
 -17 -16 2 21.96 1.61
 -17 -16 2 25.52 1.57
 17 16 -2 30.76 1.85
 -17 -16 -2 22.01 1.61
 17 17 2 0.03 0.22
 -17 -17 2 0.14 0.23
 -17 -17 -2 -0.12 0.23
 17 17 -2 0.34 0.24
 -17 -18 2 9.87 0.75
 17 18 2 13.05 0.87
 17 18 -2 12.24 0.85
 -17 -18 -2 8.88 0.75
 18 0 2 0.29 0.26
 18 0 2 0.82 0.47
 18 0 -2 0.32 0.24
 18 0 -2 0.6 0.45
 18 1 2 4.2 0.54
 18 -1 -2 3.88 0.53
 18 -1 -2 4.72 0.88
 18 1 -2 3.9 0.52
 18 -1 2 5.04 0.86
 18 1 -2 5.06 0.82
 18 -1 2 4.21 0.54
 18 2 2 0.29 0.26
 18 -2 -2 0.18 0.45
 18 -2 -2 0.65 0.29
 18 2 -2 0.44 0.26
 18 -2 2 0.48 0.27
 18 -2 2 0.71 0.5
 18 2 -2 1.03 0.49
 18 -3 -2 0.58 0.49
 18 -3 -2 0.7 0.29
 18 3 2 0.22 0.26
 18 3 -2 0.25 0.25
 18 -3 2 0.46 0.29
 18 3 -2 0.85 0.49
 18 -3 2 1.4 0.54
 18 -4 -2 -0.01 0.28
 18 -4 -2 0.51 0.49
 18 4 2 0.15 0.26
 18 4 -2 0.16 0.26
 18 4 -2 -0.39 0.49
 18 -4 2 0.21 0.3
 18 -4 2 0.25 0.54
 18 5 2 1.34 0.33
 18 -5 -2 2.13 0.6
 18 -5 2 2.13 0.41
 18 5 -2 2.02 0.59
 18 -5 2 1.44 0.62
 18 -6 -2 0.56 0.54
 18 6 2 0.2 0.28
 18 -6 2 0.29 0.32
 18 -6 2 1 0.6
 18 7 2 -0.37 0.31
 18 7 2 -0.12 0.26
 18 -7 -2 -0.18 0.53
 -18 -7 2 0.08 0.25
 18 -7 2 0.23 0.66
 -18 -7 -2 -0.27 0.24
 18 -7 2 -0.21 0.29
 18 8 2 1.6 0.37
 -18 -8 2 1.16 0.33
 18 8 2 1.27 0.38
 -18 -8 2 0.63 0.28
 18 -8 -2 1.99 0.67
 -18 -8 -2 1.44 0.31
 18 8 -2 0.61 0.41
 -18 -8 -2 1.09 0.32
 18 -8 2 1.11 0.71
 18 -8 2 1.48 0.4
 18 -8 2 4.67 1.96
 -18 -9 2 0.18 0.29
 -18 -9 2 0.07 0.27
 18 -9 -2 0.04 0.63
 18 9 2 0.42 0.34
 18 -9 2 0.04 0.33
 -18 -9 -2 0.32 0.27
 18 9 -2 0.32 0.38
 -18 -9 -2 0.26 0.29
 18 -9 2 0.31 0.73
 18 -9 2 1.52 2.01
 -18 -10 2 0.45 0.3
 18 -10 -2 1.11 0.73
 18 10 2 0.4 0.34
 18 -10 -2 5.54 2.24
 -18 -10 2 0.47 0.29
 -18 -10 -2 0.73 0.29
 18 10 -2 0.34 0.4
 18 -10 2 2.79 2.22
 -18 -10 -2 0.86 0.3
 18 -10 2 0.84 0.76
 -18 -11 2 0.94 0.33
 18 -11 -2 5.26 2.34
 -18 -11 2 1.16 0.3
 18 11 2 1.54 0.4
 18 -11 -2 0.96 0.75
 -18 -11 -2 1.47 0.35
 -18 -11 -2 1.29 0.31
 18 11 -2 0.45 0.42
 18 -11 2 -0.24 2.5
 -18 -12 2 0.14 0.26
 -18 -12 2 0.11 0.28
 18 -12 -2 -0.46 2.36
 18 12 2 -0.33 0.3
 18 -12 2 -3.96 2.69
 -18 -12 -2 -0.03 0.27
 18 12 -2 -0.21 0.34
 -18 -12 -2 0.13 0.27
 18 -12 2 0.2 0.32
 18 13 2 0.09 0.3
 -18 -13 2 0.61 0.3
 -18 -13 2 0.47 0.27
 18 -13 -2 -0.1 1.81
 18 -13 2 0.24 0.31
 18 -13 2 -2.42 1.99
 18 13 -2 0.93 0.37
 -18 -13 -2 0.3 0.26
 -18 -13 -2 -0.01 0.26
 18 -14 -2 0.85 1.75
 -18 -14 2 -0.22 0.25
 18 14 2 0.14 0.32
 -18 -14 2 -0.3 0.23
 18 14 -2 -0.13 0.29
 -18 -14 -2 0.22 0.27
 -18 -14 -2 -0.31 0.25
 18 -14 2 -0.21 0.28
 18 -14 2 -0.39 1.93
 -18 -15 2 0.29 0.26
 -18 -15 2 0.79 0.25
 18 15 2 0.65 0.31
 18 -15 -2 -0.79 1.69
 -18 -15 -2 0.04 0.25
 -18 -15 -2 0.16 0.25
 18 -15 2 -0.82 1.68
 18 15 -2 0.3 0.28
 -18 -16 2 0.44 0.23
 -18 -16 2 0.45 0.23
 18 16 2 -0.02 0.23
 18 16 -2 0.29 0.25
 -18 -16 -2 0.2 0.22
 -18 -16 -2 0.45 0.23
 18 17 2 -0.17 0.21
 -18 -17 2 0.35 0.21
 18 17 -2 0.29 0.22
 -18 -17 -2 -0.13 0.2
 19 0 2 63.64 4.26
 19 0 -2 56.65 4.23
 19 0 -2 65.6 4.52
 19 1 2 0.07 0.25
 19 -1 -2 -0.47 0.44
 19 -1 -2 0.46 0.27
 19 -1 2 0.65 0.28
 19 -1 2 0.05 0.49
 19 1 -2 0.25 0.48
 19 1 -2 0.07 0.25
 19 -2 -2 1.98 0.57
 19 -2 -2 1.41 0.35
 19 2 2 0.94 0.31
 19 -2 2 1.57 0.59
 19 2 -2 1.53 0.56
 19 -2 2 1.62 0.36
 19 2 -2 1.28 0.31
 19 3 2 0.34 0.28
 19 -3 -2 0.08 0.48
 19 -3 -2 0.41 0.3
 19 -3 2 0.37 0.28
 19 3 -2 0.34 0.27
 19 -3 2 0.81 0.54
 19 3 -2 0.72 0.53
 19 4 2 64.74 4.71
 19 -4 -2 72.43 5.04
 19 -4 -2 69.59 4.78
 19 4 -2 60.29 4.69
 19 4 -2 71.17 5.01
 19 -4 2 75.45 4.78
 19 -4 2 72.12 5.04
 19 -5 -2 1.8 0.6
 19 5 2 1.61 0.35
 19 -5 -2 1.34 0.41
 19 -5 2 1.04 0.37
 19 -5 2 1.46 0.64
 19 -6 -2 7.31 0.83
 19 6 2 6.44 0.69
 19 -6 -2 6.78 1.1
 19 -6 2 6.33 0.79
 19 -6 2 6.04 1.16
 -19 -7 2 -0.11 0.27
 19 -7 -2 -0.23 0.57
 19 7 2 -0.04 0.28
 19 -7 2 0.2 0.35
 19 -7 2 0.17 0.67
 -19 -7 -2 0.36 0.28
 19 8 2 78.06 5.37
 -19 -8 2 78.4 4.57
 19 -8 -2 83.31 5.78
 -19 -8 2 77.56 4.58
 19 8 2 71.51 5.12
 19 -8 2 85.38 5.83
 -19 -8 -2 78.72 4.57
 -19 -9 2 -0.07 0.26
 19 -9 -2 0.35 0.65
 -19 -9 2 0.27 0.28
 19 9 2 -0.1 0.34
 19 -9 2 0.47 0.72
 -19 -9 -2 0.33 0.27
 -19 -9 -2 0.46 0.26
 19 -9 2 -0.14 0.32
 19 9 -2 -0.3 0.4
 19 -10 -2 10.77 1.47
 -19 -10 2 11.11 0.83
 -19 -10 2 10.28 0.87
 19 10 2 11.1 1.03
 19 -10 2 13.36 1.09
 19 -10 2 11.46 1.58
 -19 -10 -2 9.61 0.86
 -19 -10 -2 12.12 0.83
 19 10 -2 7.81 1.04
 19 -11 -2 0.33 0.71
 19 11 2 -0.42 0.32
 -19 -11 2 -0.44 0.26
 -19 -11 2 -0.11 0.26
 19 -11 2 0.33 0.33
 19 11 -2 0.12 0.41
 -19 -11 -2 -0.24 0.25
 -19 -11 -2 0.45 0.28
 19 -11 2 7.27 3.6
 19 12 2 59.59 3.96
 -19 -12 2 57.91 3.52
 -19 -12 2 60.29 3.5
 19 12 -2 57.49 3.98
 -19 -12 -2 64.19 3.5
 19 -12 2 60.1 10.47
 -19 -12 -2 57.62 3.51
 19 13 2 -0.74 0.29
 -19 -13 2 0.19 0.26
 -19 -13 2 -0.46 0.24
 19 -13 2 -0.22 2.44
 19 -13 2 -0.27 0.28
 19 13 -2 -0.44 0.3
 -19 -13 -2 -0.15 0.25
 -19 -13 -2 -0.17 0.25
 19 14 2 10.8 0.89
 -19 -14 2 9.39 0.77
 -19 -14 2 10.23 0.72
 19 14 -2 10.77 0.9
 19 -14 2 5.56 2.77
 -19 -14 -2 9.34 0.74
 -19 -14 -2 9.38 0.77
 -19 -15 2 0.36 0.23
 -19 -15 2 0.8 0.26
 19 15 2 0.69 0.29
 -19 -15 -2 0.62 0.24
 -19 -15 -2 0.81 0.25
 19 15 -2 1.18 0.31
 -19 -16 2 20.23 1.26
 -19 -16 -2 19.52 1.25
 20 0 2 0.2 0.27
 20 0 -2 0.42 0.29
 20 0 -2 0.1 0.49
 20 1 2 -0.08 0.26
 20 -1 -2 -0.02 0.5
 20 -1 -2 -0.14 0.27
 20 1 -2 0.84 0.31
 20 -1 2 0.25 0.53
 20 1 -2 -0.11 0.51
 20 -1 2 0.19 0.29
 20 -2 -2 -0.18 0.27
 20 -2 -2 0.12 0.5
 20 2 2 0.01 0.27
 20 2 -2 -0.02 0.26
 20 2 -2 -0.89 0.49
 20 -2 2 0.57 0.55
 20 -2 2 0.17 0.28
 20 3 2 1.42 0.34
 20 -3 -2 1.5 0.39
 20 -3 -2 1.75 0.58
 20 -3 2 1.93 0.4
 20 -3 2 1.92 0.64
 20 3 -2 1.38 0.58
 20 3 -2 0.92 0.31
 20 -4 -2 0.3 0.35
 20 -4 -2 -0.3 0.51
 20 4 2 0.3 0.27
 20 -4 2 0.32 0.32
 20 4 -2 0.11 0.26
 20 4 -2 0.6 0.55
 20 -4 2 0.75 0.57
 20 5 2 1.51 0.36
 20 -5 -2 1.78 0.44
 20 -5 -2 2.15 0.66
 20 -5 2 1.95 0.42
 20 -5 2 1.3 0.67
 20 -6 -2 0.17 0.58
 20 -6 -2 0.78 0.4
 20 6 2 0.55 0.31
 20 -6 2 0.39 0.37
 20 -6 2 0.76 0.66
 -20 -7 2 -0.11 0.28
 20 -7 -2 0.29 0.39
 20 -7 -2 -1.02 0.53
 20 7 2 -0.12 0.29
 -20 -7 2 -0.13 0.27
 20 -7 2 -0.49 0.64
 20 -7 2 -0.06 0.34
 20 -8 -2 0.21 0.42
 -20 -8 2 0.13 0.27
 20 -8 -2 0.62 0.64
 -20 -8 2 -0.19 0.25
 20 -8 2 0.4 0.37
 -20 -8 -2 -0.08 0.26
 -20 -8 -2 0.4 0.29
 20 -8 2 0.34 0.72
 20 -9 -2 0.16 0.44
 20 -9 -2 0.55 0.65
 -20 -9 2 -0.02 0.27
 20 9 2 0.33 0.36
 -20 -9 2 0.17 0.26
 -20 -9 -2 0.29 0.28
 -20 -9 -2 0.19 0.25
 20 -9 2 0.07 0.71
 20 -9 2 0.63 0.39
 20 -10 -2 -1.08 0.62
 20 -10 -2 -0.18 0.43
 -20 -10 2 -0.14 0.24
 -20 -10 2 0.42 0.26
 20 10 2 0.01 0.36
 20 10 -2 -0.55 0.4
 -20 -10 -2 0.01 0.24
 -20 -10 -2 0.09 0.25
 20 -10 2 0.25 0.38
 20 -11 -2 0.49 0.45
 -20 -11 2 0.55 0.25
 20 11 2 0.26 0.36
 -20 -11 2 -0.04 0.26
 20 11 -2 0.56 0.4
 -20 -11 -2 0.03 0.25
 -20 -11 -2 -0.11 0.25
 20 -11 2 0.19 0.35
 -20 -12 2 1.26 0.31
 -20 -12 2 0.3 0.25
 20 12 2 0.91 0.38
 20 -12 -2 1.27 0.46
 20 -12 2 1.11 0.38
 -20 -12 -2 0.9 0.26
 20 12 -2 0.53 0.4
 -20 -12 -2 0.82 0.29
 -20 -13 2 -0.28 0.23
 20 13 2 -0.02 0.34
 -20 -13 2 -0.11 0.23
 20 13 -2 0.5 0.36
 -20 -13 -2 -0.14 0.22
 -20 -13 -2 -0.08 0.24
 -20 -14 2 0.28 0.23
 20 14 2 0.12 0.27
 -20 -14 2 0.17 0.21
 -20 -14 -2 0.03 0.22
 -20 -14 -2 -0.14 0.22
 20 14 -2 0.08 0.3
 -20 -15 2 0.25 0.21
 20 15 2 0.29 0.25
 -20 -15 2 -0.13 0.19
 -20 -15 -2 -0.21 0.2
 20 15 -2 -0.22 0.23
 -20 -15 -2 -0.1 0.2
 20 16 2 0.6 0.24
 21 0 -2 41.09 3.05
 21 0 2 44.93 3.07
 21 0 -2 45.41 3.34
 21 -1 -2 8.32 0.79
 21 -1 -2 8.45 1.11
 21 1 2 7.48 0.77
 21 -1 2 8.21 0.77
 21 1 -2 9.44 1.14
 21 1 -2 5.89 0.72
 21 -1 2 8.27 1.14
 21 -2 -2 0.06 0.53
 21 -2 -2 0.27 0.31
 21 2 2 0.33 0.29
 21 -2 2 -0.87 0.52
 21 2 -2 0.29 0.28
 21 -2 2 0.26 0.31
 21 2 -2 -0.17 0.52
 21 -3 -2 15.5 1.31
 21 -3 -2 16.23 1.56
 21 3 2 15.61 1.24
 21 3 -2 12.98 1.21
 21 -3 2 16.19 1.6
 21 3 -2 17.39 1.59
 21 -3 2 18.62 1.32
 21 -4 -2 30.54 2.68
 21 -4 -2 35.31 2.47
 21 4 2 30.87 2.39
 21 -4 2 29.9 2.71
 21 -4 2 40.49 2.49
 21 -5 -2 9.92 1.31
 21 5 2 9.71 0.92
 21 -5 -2 13.27 1.09
 21 -5 2 10.45 1.4
 21 -5 2 11.51 1.04
 21 -6 -2 2.3 0.51
 21 -6 -2 1.91 0.65
 21 6 2 1.21 0.35
 21 -6 2 1.36 0.43
 21 -6 2 2.62 0.76
 21 -7 -2 19.3 1.43
 21 7 2 13.21 1.18
 21 -7 -2 14.91 1.59
 -21 -7 2 13.76 1.01
 21 -7 2 16.43 1.29
 21 -7 2 14.63 1.69
 -21 -8 2 23.11 1.56
 -21 -8 2 24.38 1.61
 21 -8 -2 23.86 2.21
 -21 -8 -2 24.61 1.57
 21 -8 2 24.84 2.3
 21 -8 2 30.7 1.96
 21 -9 -2 8.92 0.93
 21 -9 -2 6.37 1.21
 -21 -9 2 6.11 0.58
 -21 -9 2 4.5 0.61
 21 -9 2 8.34 0.81
 -21 -9 -2 6.39 0.63
 -21 -9 -2 6.97 0.59
 -21 -10 2 4.56 0.5
 21 10 2 3.6 0.62
 21 -10 -2 3.19 0.85
 21 -10 -2 7.22 0.85
 -21 -10 2 4.54 0.55
 21 -10 2 6.34 0.72
 -21 -10 -2 5.85 0.53
 -21 -10 -2 4.97 0.56
 21 -11 -2 11.59 1.04
 -21 -11 2 7.94 0.72
 -21 -11 2 8.07 0.68
 21 11 2 7.36 0.87
 21 -11 2 11.86 0.91
 -21 -11 -2 7.72 0.71
 -21 -11 -2 9.36 0.69
 -21 -12 2 18.21 1.12
 21 12 2 17.01 1.36
 -21 -12 2 15.34 1.14
 -21 -12 -2 16.54 1.15
 -21 -12 -2 19.43 1.13
 -21 -13 2 1.27 0.29
 -21 -13 2 1.27 0.25
 21 13 2 1.21 0.36
 21 13 -2 2.02 0.43
 -21 -13 -2 1.27 0.27
 -21 -13 -2 1.24 0.27
 -21 -14 2 5.35 0.54
 -21 -14 2 7.22 0.52
 21 14 2 7.53 0.7
 -21 -14 -2 5.7 0.54
 21 14 -2 6.57 0.7
 22 0 2 0.33 0.3
 22 0 -2 0.19 0.28
 22 0 -2 0.22 0.58
 22 -1 -2 0.12 0.54
 22 1 2 0.26 0.29
 22 -1 -2 0.38 0.3
 22 1 -2 0.39 0.29
 22 -1 2 -0.02 0.3
 22 1 -2 0.03 0.54
 22 2 2 0.01 0.27
 22 -2 -2 0.07 0.31
 22 -2 -2 -0.09 0.57
 22 2 -2 0.42 0.58
 22 -2 2 0.01 0.59
 22 2 -2 0.18 0.29
 22 -2 2 0.11 0.31
 22 -3 -2 -0.03 0.32
 22 -3 -2 0.16 0.55
 22 3 2 0.01 0.27
 22 -3 2 -0.08 0.62
 22 3 -2 -0.09 0.27
 22 -3 2 -0.27 0.31
 22 4 2 0.36 0.3
 22 -4 -2 0.38 0.55
 22 -4 -2 0.64 0.38
 22 -4 2 0.29 0.64
 22 -4 2 0.18 0.35
 22 -5 -2 0.25 0.55
 22 5 2 -0.28 0.27
 22 -5 -2 0.69 0.4
 22 -5 2 0.64 0.65
 22 -5 2 0.23 0.37
 22 -6 -2 0.43 0.58
 22 6 2 0.41 0.3
 22 -6 -2 0.51 0.42
 22 -6 2 0.4 0.67
 22 -6 2 0.54 0.38
 22 -7 -2 1.28 0.65
 22 -7 -2 1.32 0.5
 -22 -7 2 0.47 0.27
 22 -7 2 1.08 0.71
 22 -7 2 1.91 0.47
 -22 -8 2 2.89 0.43
 -22 -8 2 2.41 0.39
 22 -8 -2 4.56 0.74
 22 -8 -2 4.02 0.85
 22 -8 2 2.62 0.52
 -22 -8 -2 3.33 0.43
 22 -9 -2 0.51 0.65
 -22 -9 2 0.39 0.28
 -22 -9 2 0.86 0.25
 22 -9 -2 0.66 0.49
 -22 -9 -2 0.41 0.25
 -22 -9 -2 0.59 0.28
 22 -9 2 0.74 0.41
 -22 -10 2 1.88 0.32
 -22 -10 2 1.28 0.27
 -22 -10 -2 1.29 0.3
 -22 -10 -2 2.37 0.37
 -22 -11 2 1.32 0.26
 -22 -11 2 1.14 0.28
 -22 -11 -2 1.39 0.26
 -22 -11 -2 1.51 0.3
 22 12 2 1.48 0.42
 -22 -12 2 2.5 0.34
 -22 -12 2 2.68 0.38
 -22 -12 -2 2.05 0.31
 22 13 2 -0.02 0.32
 -22 -13 2 -0.34 0.18
 -22 -13 2 -0.09 0.2
 -22 -13 -2 -0.01 0.2
 -22 -13 -2 -0.24 0.2
 23 0 2 3.14 0.54
 23 0 -2 2.44 0.72
 23 0 -2 3.61 0.53
 23 -1 -2 15.41 1.54
 23 -1 -2 13.98 1.19
 23 1 2 14.81 1.19
 23 1 -2 15.36 1.56
 23 1 -2 13.34 1.17
 23 -1 2 16.9 1.24
 23 -2 -2 0.13 0.56
 23 2 2 1.11 0.32
 23 -2 -2 0.82 0.33
 23 2 -2 0.61 0.3
 23 -2 2 0.93 0.36
 23 3 2 33.78 2.59
 23 -3 -2 36.95 2.66
 23 -3 -2 36.36 2.91
 23 -3 2 41.54 2.66
 23 -3 2 34.93 2.91
 23 -4 -2 3.8 0.65
 23 -4 -2 1.6 0.68
 23 4 2 2.72 0.51
 23 -4 2 4.41 0.6
 23 -4 2 2.45 0.76
 23 -5 -2 6.79 1.14
 23 -5 -2 6.95 0.84
 23 -5 2 7.18 1.24
 23 -5 2 6.56 0.78
 23 -6 -2 -0.22 0.59
 23 -6 -2 0.49 0.46
 23 -6 2 1.19 0.7
 23 -6 2 -0.27 0.37
 23 -7 -2 44.64 3.2
 23 -7 2 43.03 3.14
 23 -8 -2 2.59 0.72
 -23 -8 2 1.63 0.29
 -23 -8 -2 1.8 0.3
 -23 -9 2 4.37 0.43
 -23 -9 -2 4.54 0.44
 -23 -9 -2 3.06 0.46
 -23 -10 2 0.52 0.23
 -23 -10 2 0.8 0.27
 -23 -10 -2 0.98 0.26
 -23 -10 -2 0.96 0.24
 -23 -11 2 12.9 0.92
 -23 -11 2 13.23 0.87
 -23 -11 -2 14.42 0.92
 -23 -12 2 0.35 0.2
 -23 -12 -2 0.27 0.21
 24 0 -2 -0.66 0.6
 24 0 2 -0.06 0.29
 24 0 -2 0.26 0.32
 24 1 2 -0.02 0.28
 24 -1 -2 0.51 0.35
 24 -1 -2 -0.4 0.59
 24 -1 2 0.07 0.31
 24 -2 -2 -0.06 0.33
 24 2 2 -0.09 0.29
 24 -2 -2 -0.67 0.56
 24 -2 2 -0.33 0.32
 24 -3 -2 0.1 0.62
 24 -3 -2 0.56 0.37
 24 -3 2 0.25 0.34
 24 -4 -2 -0.54 0.59
 24 -4 2 0.56 0.38
 24 -4 2 0.83 0.68
 24 -5 -2 -0.61 0.57
 24 -5 2 0.54 0.7
 24 -6 -2 0.82 0.62
 24 -7 -2 1.61 0.66
 -24 -7 2 0.97 0.25
 -24 -7 -2 0.65 0.25
 24 -8 -2 0.48 0.57
 -24 -8 2 -0.12 0.21
 -24 -8 -2 0.24 0.21
 -24 -9 2 0.12 0.21
 -24 -9 -2 0.35 0.22
 -24 -10 2 0.15 0.19
 -24 -10 -2 0.42 0.21
 25 -1 -2 7.52 1.27
 25 -2 -2 1.14 0.7
 25 -3 -2 7.58 1.23
 25 -4 -2 1.95 0.71
 0 1 -3 0.11 0.02
 0 -1 3 0.01 0.04
 0 2 3 54.6 4
 0 -2 3 52.53 3.36
 0 3 3 0.1 0.08
 0 -3 3 0.03 0.06
 0 -4 3 6.03 0.44
 0 4 3 6.42 0.53
 0 5 3 -0.05 0.15
 0 5 3 0.07 0.12
 0 6 3 183.37 13.12
 0 6 -3 176.01 11.34
 0 6 3 168.83 11.37
 0 7 3 0.16 0.14
 0 7 -3 0.06 0.12
 0 7 3 -0.03 0.17
 0 8 3 0.26 0.2
 0 8 -3 0.34 0.15
 0 8 3 0.53 0.18
 0 9 3 0.22 0.21
 0 9 -3 0 0.14
 0 9 3 0.15 0.16
 0 10 -3 51.5 3.45
 0 10 3 52.48 3.49
 0 10 3 52.78 3.98
 0 11 3 0.04 0.19
 0 -11 3 -0.02 0.14
 0 11 -3 -0.08 0.16
 0 -11 3 -0.07 0.44
 0 11 3 -0.16 0.15
 0 12 -3 16.86 1.21
 0 -12 3 16.23 1.18
 0 -12 -3 17.33 2.49
 0 12 3 16.2 1.25
 0 -12 3 13.82 2.52
 0 12 3 18.02 1.39
 0 13 3 -0.02 0.22
 0 13 3 0.16 0.21
 0 -13 3 -0.03 0.16
 0 13 -3 -0.04 0.18
 0 -13 -3 -0.18 0.43
 0 -13 3 -0.19 0.46
 0 -14 -3 10.69 1.91
 0 -14 3 9.42 1.98
 0 -14 3 11.82 0.89
 0 14 3 11.52 0.96
 0 14 -3 11.54 0.91
 0 14 3 11.88 1.03
 0 -15 3 0.01 0.49
 0 -15 -3 -0.2 0.45
 0 15 -3 -0.19 0.19
 0 -15 3 -0.14 0.19
 0 15 3 -0.08 0.23
 0 15 3 -0.17 0.17
 0 16 -3 6.8 0.66
 0 16 3 6.43 0.53
 0 16 -3 6.25 0.53
 0 -16 3 6.99 1.58
 0 -16 -3 7.34 1.54
 0 16 3 7.37 0.71
 0 -17 3 -0.2 0.47
 0 17 3 0.37 0.3
 0 17 -3 -0.03 0.18
 0 -17 -3 0.1 0.48
 0 -17 3 0.26 0.44
 0 17 3 -0.12 0.18
 0 17 -3 0.37 0.26
 0 18 -3 6.93 0.55
 0 18 3 6.67 0.74
 0 18 3 6.87 0.55
 0 -18 -3 5.53 1.45
 0 -18 3 7.28 1.61
 0 -18 3 6.39 1.05
 0 -19 -3 0.22 0.47
 0 19 3 -0.1 0.18
 0 19 3 0 0.18
 0 -19 3 -0.16 0.44
 0 19 -3 0.01 0.18
 0 20 -3 16.26 1.08
 0 20 3 16.79 1.08
 0 20 -3 17.53 1.09
 0 -20 3 18.59 2.6
 0 20 3 15.89 1.07
 0 21 3 -0.01 0.17
 0 21 -3 -0.02 0.17
 0 21 3 0.02 0.17
 0 21 -3 -0.58 0.17
 0 -21 3 0 0.42
 0 22 3 7.53 0.55
 0 -22 3 7.39 1.44
 0 22 -3 6.36 0.54
 0 22 3 6.14 0.53
 0 22 -3 8.46 0.57
 0 23 3 -0.14 0.15
 0 23 -3 -0.09 0.16
 0 23 3 0.08 0.15
 0 24 3 5.63 0.44
 -1 0 -3 0.21 0.05
 1 0 3 0.25 0.04
 -1 1 -3 3.44 0.21
 1 -1 3 2.79 0.23
 1 -1 3 3.4 0.21
 -1 -2 3 13.58 0.96
 1 2 3 15.95 1.16
 1 -2 3 14.35 0.97
 1 -2 3 16.42 0.91
 1 3 3 3.79 0.34
 -1 -3 3 3.36 0.26
 -1 -3 3 3.59 0.23
 1 -3 3 3.7 0.28
 1 4 3 10.89 0.81
 -1 -4 3 9.23 0.67
 -1 4 3 10.33 0.8
 1 -4 3 9.96 0.68
 1 5 3 12.24 0.88
 -1 -5 3 11.01 0.79
 1 5 3 12.28 0.96
 -1 5 3 12.06 0.94
 1 6 3 0.66 0.2
 -1 6 -3 0.63 0.15
 1 6 3 0.65 0.17
 -1 6 -3 0.69 0.13
 -1 6 3 0.58 0.19
 -1 6 3 0.67 0.16
 1 6 -3 1.01 0.17
 -1 7 -3 2.23 0.25
 -1 7 -3 1.91 0.27
 1 7 3 2.63 0.37
 1 7 3 2.36 0.32
 1 7 -3 2.14 0.29
 -1 7 3 2.6 0.3
 -1 7 3 1.84 0.32
 1 8 3 4.17 0.42
 -1 8 -3 3.79 0.36
 -1 8 -3 3.53 0.36
 1 8 3 3.5 0.43
 -1 8 3 3.25 0.39
 -1 8 3 3.58 0.42
 1 8 -3 3.79 0.38
 -1 9 -3 2.39 0.31
 -1 9 -3 2.77 0.33
 1 9 3 2.7 0.39
 1 9 3 2.65 0.37
 -1 9 3 2.71 0.38
 -1 9 3 3.05 0.37
 1 9 -3 2.9 0.33
 -1 10 -3 1.79 0.31
 1 10 3 2.28 0.38
 1 10 3 1.86 0.34
 -1 10 3 1.91 0.33
 1 10 -3 2.33 0.34
 -1 10 3 2.23 0.34
 1 11 3 3.19 0.42
 1 11 3 2.7 0.37
 -1 -11 3 2.82 0.32
 -1 -11 3 1.22 0.6
 -1 11 -3 2.16 0.33
 -1 11 3 2.32 0.36
 1 11 -3 2.22 0.35
 1 -11 3 1.7 0.76
 1 -11 3 2.49 0.32
 -1 11 3 2.46 0.39
 -1 -12 3 0.33 0.17
 1 -12 -3 0.83 0.5
 -1 -12 3 0.28 0.48
 -1 12 -3 0.28 0.19
 1 12 3 0.56 0.23
 1 12 3 0.31 0.23
 -1 12 3 0.46 0.24
 1 12 -3 0.41 0.21
 -1 -12 -3 0.55 0.5
 -1 12 3 0.35 0.21
 1 -12 3 0.02 0.55
 1 -12 3 0.4 0.18
 -1 -13 3 -0.05 0.16
 -1 13 -3 -0.1 0.19
 1 13 3 0.17 0.23
 -1 -13 3 0 0.46
 1 -13 -3 0.22 0.49
 1 13 3 -0.01 0.22
 -1 13 3 0.39 0.24
 1 -13 3 0.05 0.18
 -1 -13 -3 0.19 0.47
 1 13 -3 0.23 0.21
 1 -13 3 0.09 0.51
 -1 13 3 0.19 0.21
 -1 -14 3 0.36 0.21
 -1 14 -3 0.16 0.22
 -1 -14 3 -0.18 0.45
 1 14 3 0.37 0.26
 1 14 3 0.35 0.24
 1 -14 -3 0.26 0.48
 1 -14 3 -0.01 0.2
 -1 14 3 0.29 0.25
 -1 -14 -3 -0.31 0.44
 1 14 -3 -0.03 0.21
 1 -14 3 0.11 0.5
 1 15 3 -0.04 0.16
 1 -15 -3 0.05 0.46
 1 15 3 0.09 0.24
 -1 15 -3 0.02 0.2
 -1 -15 3 -0.06 0.48
 1 15 3 0.05 0.23
 1 -15 3 -0.25 0.48
 -1 15 3 0.05 0.24
 1 15 -3 -0.22 0.19
 -1 -15 -3 0.07 0.45
 1 15 -3 0.08 0.16
 1 -15 3 0.05 0.21
 1 -16 -3 0.94 0.57
 1 16 3 1.2 0.35
 -1 16 -3 0.81 0.28
 1 16 3 1.56 0.23
 -1 -16 3 0.96 0.63
 -1 16 3 1.92 0.39
 1 16 -3 1.28 0.32
 1 16 -3 1.55 0.23
 -1 -16 -3 1.06 0.61
 1 -16 3 0.5 0.44
 1 -16 3 1.23 0.66
 1 -16 3 1.22 0.31
 -1 -17 3 0.7 0.57
 1 17 3 0.37 0.29
 1 -17 -3 0.58 0.52
 1 17 3 0.43 0.2
 1 17 3 0.32 0.2
 1 -17 3 0.41 0.5
 -1 17 3 0.18 0.27
 -1 -17 -3 0.32 0.5
 1 17 -3 0.89 0.22
 1 17 -3 0.12 0.24
 1 -17 3 0.27 0.54
 1 18 3 0.98 0.23
 1 18 3 1 0.22
 1 -18 -3 0.43 0.54
 1 18 3 0.96 0.34
 -1 -18 3 0.69 0.56
 1 -18 3 0.58 0.59
 -1 -18 -3 0.94 0.55
 1 18 -3 1.81 0.37
 -1 18 3 0.9 0.33
 1 18 -3 1.45 0.24
 1 -18 3 1.31 0.59
 1 18 -3 1.43 0.25
 1 19 3 0.12 0.19
 1 -19 -3 0.07 0.47
 1 19 3 -0.12 0.18
 -1 -19 3 -0.17 0.45
 1 19 -3 0.3 0.2
 1 19 -3 0.16 0.19
 1 -19 3 0.01 0.45
 -1 -19 -3 0.24 0.47
 1 20 3 1.02 0.24
 -1 -20 3 0.36 0.47
 1 20 3 0.77 0.22
 1 20 -3 1.45 0.23
 1 20 -3 1.25 0.24
 1 -20 3 0.46 0.52
 1 21 3 2.72 0.34
 1 21 3 3.43 0.36
 -1 -21 3 2.04 0.7
 1 -21 3 1.71 0.66
 1 21 -3 2.89 0.35
 1 21 -3 2.84 0.35
 -1 21 3 2.84 0.35
 1 22 3 -0.19 0.16
 -1 22 -3 0.07 0.18
 1 22 3 0.23 0.18
 -1 -22 3 -0.01 0.4
 -1 22 3 -0.04 0.17
 1 -22 3 0.1 0.41
 1 22 -3 0.04 0.17
 1 22 -3 -0.04 0.17
 -1 23 -3 0.54 0.18
 1 23 3 0.2 0.16
 1 23 3 0.21 0.16
 1 23 -3 0.33 0.17
 -1 23 3 0.15 0.16
 1 23 -3 0.25 0.17
 1 24 3 -0.13 0.13
 1 24 -3 -0.04 0.13
 2 0 3 0.07 0.05
 -2 0 -3 0.03 0.05
 2 0 3 0.06 0.05
 -2 1 -3 2.13 0.15
 2 -1 3 1.75 0.16
 2 1 -3 1.86 0.14
 -2 -1 -3 1.99 0.16
 2 -1 3 2.01 0.14
 2 2 3 140.55 10.26
 -2 -2 3 142.11 8.25
 2 2 -3 143.82 8.25
 2 -2 3 139.53 8.26
 2 -2 3 123.56 8.62
 -2 -3 3 53.41 3.65
 -2 -3 3 61.47 3.49
 2 3 3 59.02 4.36
 2 -3 3 54.08 3.66
 2 -3 3 62.65 3.5
 -2 -4 3 5.39 0.34
 -2 -4 3 4.86 0.38
 2 4 3 5.99 0.49
 2 -4 3 5.39 0.41
 2 5 3 3.97 0.43
 -2 -5 3 4.84 0.29
 -2 -5 3 3.99 0.33
 -2 5 -3 3.88 0.35
 2 5 3 5.05 0.43
 -2 5 3 4.24 0.4
 2 5 -3 4.13 0.37
 2 -5 3 4.22 0.36
 2 6 3 98.57 6
 2 6 3 103.68 6.89
 -2 6 -3 82.73 5.94
 -2 6 -3 86.52 6.84
 2 6 -3 89.3 5.95
 -2 6 3 91.68 6.87
 -2 7 -3 3.53 0.35
 -2 7 -3 3.28 0.32
 2 7 3 4.05 0.42
 2 7 3 3.92 0.4
 -2 7 3 3.28 0.36
 2 7 -3 3.57 0.36
 -2 7 3 3.26 0.39
 2 8 3 6.88 0.6
 -2 8 -3 6 0.52
 2 8 3 6.39 0.58
 -2 8 -3 5.58 0.5
 2 8 -3 6.05 0.52
 -2 8 3 6.67 0.56
 -2 8 3 5.91 0.56
 -2 9 -3 60.04 4.16
 2 9 3 66.86 4.23
 2 9 3 66.39 4.83
 -2 9 3 63.12 4.81
 2 9 -3 66.75 4.18
 -2 9 3 58.95 4.19
 2 10 3 72.06 4.74
 -2 10 -3 71.44 4.69
 2 10 3 71.82 5.43
 -2 -10 3 67.24 4.56
 -2 10 3 71.78 4.73
 2 10 -3 75.02 4.71
 -2 10 3 72.41 5.42
 2 11 3 0.68 0.26
 -2 11 -3 0.39 0.19
 -2 -11 3 0.21 0.15
 2 11 3 0.4 0.21
 2 -11 3 0.31 0.62
 2 -11 3 0.3 0.18
 -2 11 3 0.67 0.21
 2 11 -3 0.31 0.19
 -2 11 3 0.38 0.22
 -2 -12 3 10.47 1.82
 2 12 3 10.61 0.95
 2 12 3 10.91 0.9
 -2 -12 3 9.43 0.79
 2 -12 -3 10.11 1.81
 -2 12 -3 11.32 0.83
 -2 -12 -3 10.34 1.8
 2 -12 3 8.22 1.89
 2 -12 3 11.04 0.83
 -2 12 3 11.98 0.94
 2 12 -3 10.29 0.84
 -2 12 3 10.14 0.86
 2 -13 -3 18.02 2.54
 -2 -13 3 15.75 2.48
 2 13 3 16.72 1.4
 -2 13 -3 18 1.23
 2 13 3 16.66 1.28
 -2 13 3 16.88 1.39
 2 -13 3 13.71 2.57
 -2 -13 -3 15.43 2.46
 -2 13 3 15.79 1.25
 2 -13 3 16.62 1.21
 2 13 -3 17.34 1.24
 2 -14 -3 29.26 3.88
 -2 14 -3 28.01 1.99
 2 14 3 27.45 2.3
 2 14 3 29.4 2.06
 -2 -14 3 27.48 3.84
 2 14 -3 30.73 2.02
 -2 14 3 30.17 2.05
 2 -14 3 26.42 3.95
 2 -14 3 29.54 1.97
 -2 -14 -3 26.69 3.79
 2 15 3 0.17 0.27
 2 15 3 0.18 0.17
 -2 -15 3 0.28 0.49
 2 -15 -3 0.47 0.53
 2 15 3 0.02 0.18
 -2 15 -3 0.19 0.23
 2 15 3 0.09 0.25
 2 15 -3 0.74 0.27
 2 -15 3 0.08 0.22
 -2 15 3 0.29 0.25
 2 -15 3 0.06 0.53
 2 15 -3 0.17 0.17
 -2 -15 -3 0.34 0.49
 2 -15 3 -0.08 0.4
 -2 -16 3 5.37 1.43
 2 16 3 5.35 0.64
 2 16 3 4.59 0.43
 2 16 3 3.91 0.43
 2 -16 -3 5.47 1.4
 2 16 3 5.46 0.62
 2 16 -3 5.03 0.56
 2 16 -3 4.31 0.46
 -2 -16 -3 4.41 1.28
 2 -16 3 4.67 0.88
 2 -16 3 5.35 1.49
 2 16 -3 5.1 0.45
 -2 16 3 5.49 0.6
 2 -16 3 3.84 0.53
 2 17 3 14.29 1.2
 -2 -17 3 13.49 2.39
 2 -17 -3 15.2 2.39
 2 17 3 14.21 0.97
 2 17 3 14.81 0.97
 2 17 -3 14.55 1.17
 2 17 -3 15.2 0.98
 2 -17 3 16.25 1.57
 -2 -17 -3 15.2 2.35
 2 -17 3 14.64 2.47
 2 17 -3 14.9 0.98
 -2 17 3 15.23 1.21
 -2 -18 3 2.01 0.74
 2 18 3 2.81 0.35
 2 18 3 2.5 0.47
 2 18 3 2.87 0.35
 2 -18 -3 1.77 0.71
 2 18 -3 3.03 0.37
 -2 -18 -3 1.41 0.66
 -2 18 3 3.11 0.51
 2 18 -3 3.64 0.37
 2 -18 3 2.38 0.68
 2 18 -3 2.14 0.43
 2 -18 3 1.94 0.76
 2 19 3 -0.08 0.17
 2 19 3 0.03 0.19
 -2 -19 3 0.23 0.48
 2 -19 -3 0.43 0.5
 2 19 -3 0.17 0.19
 2 19 -3 0.37 0.18
 2 -19 3 -0.12 0.45
 -2 -19 -3 0 0.44
 -2 -20 3 1.86 0.73
 2 20 3 3.71 0.37
 2 20 3 2.97 0.36
 2 -20 -3 2.14 0.72
 2 20 -3 3.8 0.38
 2 -20 3 1.72 0.72
 2 20 -3 3.44 0.38
 2 21 3 12.05 0.79
 -2 -21 3 10.77 1.91
 2 21 3 10.58 0.77
 2 21 -3 11.81 0.79
 2 -21 3 11.21 1.98
 2 21 -3 11.34 0.78
 -2 -22 3 7.72 1.55
 2 22 3 9.37 0.63
 2 22 3 7.55 0.61
 2 22 -3 9.7 0.63
 2 -22 3 8.43 1.59
 2 22 -3 8.53 0.63
 2 23 3 0.2 0.15
 2 23 3 -0.07 0.15
 -2 23 -3 -0.02 0.17
 2 23 -3 -0.17 0.16
 -2 23 3 0.07 0.16
 2 23 -3 0.11 0.16
 2 24 3 5.51 0.42
 2 24 -3 4.88 0.4
 -3 0 -3 0.17 0.07
 3 0 3 0.07 0.06
 3 0 3 0.1 0.06
 -3 1 -3 9.31 0.58
 3 1 3 8.56 0.59
 3 1 3 9.96 0.59
 3 1 3 9.05 0.72
 3 -1 3 9.87 0.58
 3 -1 3 8.72 0.61
 3 1 -3 8.6 0.57
 -3 -1 -3 9.72 0.59
 -3 -2 3 18.86 1.12
 3 2 3 18.33 1.42
 3 2 -3 19.57 1.13
 -3 -2 -3 17.79 1.15
 3 -2 3 17.19 1.19
 3 -2 3 18.99 1.13
 3 3 3 0.14 0.12
 -3 -3 3 0.24 0.05
 3 3 -3 0.07 0.06
 -3 -3 -3 0.18 0.09
 3 -3 3 0.1 0.09
 3 -3 3 0.1 0.06
 3 4 3 15.12 1.14
 3 4 3 13.87 1.02
 -3 -4 3 13.4 0.92
 -3 -4 3 15.38 0.88
 3 -4 3 13.79 0.96
 3 -4 3 15.28 0.9
 3 -4 3 13.33 1.17
 3 4 -3 14.48 0.98
 3 5 3 0.23 0.18
 3 5 3 0.27 0.15
 -3 -5 3 0.35 0.07
 -3 -5 3 0.14 0.08
 3 -5 3 0.36 0.13
 3 5 -3 0.22 0.12
 3 -5 3 0.19 0.19
 -3 5 3 -0.15 0.12
 -3 6 -3 1.28 0.17
 -3 -6 3 1.26 0.18
 -3 6 -3 1.5 0.23
 3 6 3 1.8 0.28
 3 6 3 1.72 0.28
 -3 -6 3 1.3 0.14
 -3 6 3 1.34 0.23
 3 -6 3 1.56 0.25
 3 6 -3 1.61 0.22
 3 -6 3 0.39 0.26
 3 7 3 3.14 0.42
 -3 7 -3 3.07 0.32
 -3 -7 3 3.04 0.28
 -3 -7 3 2.71 0.23
 3 7 3 3.3 0.38
 -3 7 3 3.24 0.35
 3 7 -3 3.06 0.34
 3 8 3 1.31 0.25
 -3 8 -3 1.22 0.21
 -3 -8 3 1.35 0.21
 3 8 3 1.57 0.31
 -3 8 3 1.34 0.26
 3 8 -3 1.18 0.22
 -3 8 3 1.16 0.26
 3 9 3 7.22 0.63
 -3 9 -3 5.9 0.53
 3 9 3 6.9 0.64
 -3 -9 3 6.32 0.5
 -3 9 3 7.07 0.61
 3 9 -3 6.83 0.57
 -3 9 3 5.26 0.58
 3 10 3 0.95 0.25
 3 10 3 0.94 0.29
 -3 10 -3 0.79 0.2
 -3 -10 3 0.82 0.17
 3 -10 3 0.7 0.21
 -3 10 3 0.66 0.26
 3 10 -3 0.79 0.22
 -3 10 3 0.86 0.21
 3 11 3 9.68 0.85
 3 11 3 10.23 0.82
 3 11 3 7.8 0.75
 -3 11 -3 8.49 0.73
 3 11 -3 9.82 0.77
 3 -11 3 4.79 1.73
 3 -11 3 10.18 0.75
 -3 11 3 10.11 0.83
 -3 11 3 9.57 0.78
 3 12 3 0.35 0.26
 3 -12 -3 0.52 0.51
 3 12 3 0.2 0.21
 -3 12 -3 0.06 0.18
 3 -12 3 0.2 0.2
 -3 12 3 0.39 0.25
 3 12 -3 0.23 0.2
 -3 12 3 0.01 0.18
 3 -12 3 0.12 0.58
 -3 13 -3 2.33 0.34
 3 13 3 2.23 0.37
 3 13 3 1.52 0.37
 -3 -13 3 1.18 0.58
 3 -13 -3 1.4 0.63
 3 -13 3 0.5 0.41
 3 -13 3 1.11 0.68
 -3 13 3 1.41 0.33
 3 -13 3 1.7 0.3
 -3 -13 -3 0.87 0.52
 3 13 -3 2.03 0.34
 3 -14 -3 10.94 1.8
 -3 14 -3 9.64 0.74
 3 14 3 8.1 0.61
 3 14 3 8.2 0.84
 3 14 3 8.01 0.8
 -3 -14 3 8.81 1.67
 3 -14 3 5.74 1.78
 3 14 -3 8.86 0.76
 -3 -14 -3 7.17 1.68
 -3 14 3 8.64 0.78
 3 -14 3 9.08 0.75
 3 -14 3 9.27 1.09
 3 15 3 4.74 0.59
 3 -15 -3 4.67 1.37
 -3 -15 3 5.23 1.37
 3 15 3 4.13 0.42
 3 15 3 5.37 0.61
 3 15 3 4.88 0.42
 3 -15 3 2.51 0.95
 3 -15 3 4.54 0.83
 3 -15 3 4.32 0.5
 3 15 -3 4.71 0.54
 3 15 -3 3.8 0.44
 -3 -15 -3 4.79 1.3
 3 15 -3 4.65 0.43
 -3 15 3 4.78 0.57
 3 16 3 1.6 0.24
 3 16 3 1.49 0.24
 -3 -16 3 1.39 0.63
 3 -16 -3 1.49 0.68
 3 16 3 1.71 0.4
 -3 -16 -3 1.18 0.63
 3 -16 3 1.62 0.74
 -3 16 3 2.38 0.42
 3 -16 3 1.45 0.57
 3 16 -3 2.22 0.38
 3 -16 3 1.45 0.34
 3 16 -3 1.4 0.24
 3 16 -3 1.79 0.27
 3 -17 -3 9.36 1.78
 3 17 3 8.99 0.65
 3 17 3 8.46 0.63
 -3 -17 3 10.02 1.83
 3 17 3 7.85 0.82
 -3 17 3 8.11 0.81
 3 17 -3 9.04 0.64
 -3 -17 -3 8.62 1.66
 3 -17 3 8.37 1.12
 3 17 -3 7.22 0.77
 3 17 -3 8.96 0.65
 3 -17 3 6.46 1.78
 -3 -18 3 4.92 1.36
 3 18 3 4.69 0.44
 3 -18 -3 6.11 1
 3 -18 -3 4.98 1.44
 3 18 3 4.66 0.45
 3 18 3 3.63 0.59
 -3 -18 -3 4.77 1.3
 3 18 -3 5.04 0.46
 3 18 -3 4.76 0.56
 3 -18 3 4.19 0.84
 -3 18 3 3.96 0.59
 3 -18 3 2.97 0.98
 3 18 -3 5.32 0.46
 3 -19 -3 0.08 0.48
 3 19 3 0.37 0.2
 -3 -19 3 0.06 0.48
 3 19 3 0.1 0.19
 3 19 -3 0.14 0.18
 3 19 -3 0.3 0.19
 3 -19 3 -0.4 0.47
 3 20 3 0.23 0.18
 -3 -20 3 0.54 0.49
 3 -20 -3 0.22 0.45
 3 20 3 -0.05 0.18
 3 20 -3 0.37 0.19
 3 -20 3 -0.22 0.47
 3 20 -3 0.48 0.21
 -3 -21 3 4.28 1.29
 3 21 3 5.54 0.48
 3 21 3 5.17 0.48
 3 21 -3 5.72 0.48
 3 -21 3 5.71 1.37
 3 21 -3 6.46 0.5
 -3 -22 3 -0.03 0.38
 3 22 3 -0.05 0.16
 3 22 3 -0.04 0.16
 3 22 -3 -0.18 0.16
 3 22 -3 -0.09 0.17
 3 -22 3 -0.06 0.38
 3 23 3 -0.06 0.14
 3 23 3 0.07 0.14
 3 23 -3 0.26 0.15
 3 23 -3 0.19 0.16
 3 24 3 0.38 0.14
 3 24 -3 0.48 0.14
 4 0 3 0.12 0.06
 4 0 3 0.1 0.07
 4 0 -3 0.03 0.06
 -4 0 -3 0.19 0.08
 -4 1 -3 140.65 8.22
 4 1 3 142.27 10.18
 4 1 3 131.62 8.55
 4 1 3 143.99 8.22
 -4 -1 -3 139.43 8.22
 4 -1 3 128.57 8.56
 4 -1 3 139.07 8.21
 4 1 -3 129.65 8.2
 4 2 3 31.19 2.38
 -4 -2 3 33.23 1.9
 -4 -2 -3 30.44 1.92
 4 -2 3 32.4 1.91
 4 -2 3 29.17 2
 4 2 -3 31.81 1.9
 4 3 3 17.87 1.42
 -4 -3 3 18.96 1.12
 4 3 -3 19.14 1.12
 -4 -3 -3 16.24 1.14
 4 -3 3 19.5 1.45
 4 -3 3 16.25 1.19
 4 -3 3 19.02 1.13
 4 3 -3 19.02 1.22
 4 4 3 32.83 2.49
 4 4 3 35.63 2.18
 -4 -4 3 33.61 1.98
 4 4 -3 33.67 2.15
 4 -4 3 31.25 2.09
 -4 -4 -3 28.56 2.01
 4 -4 3 31.17 2.52
 4 -4 3 34 1.99
 4 5 3 31.74 2.35
 -4 -5 3 32.28 1.85
 4 5 3 31.83 2.06
 -4 -5 3 27.76 1.93
 4 -5 3 31.69 2.39
 4 -5 3 32.49 1.87
 4 5 -3 31.75 2.03
 4 -5 3 29.83 1.97
 -4 -5 -3 25.25 1.89
 -4 -6 3 0.38 0.08
 -4 -6 3 0.41 0.1
 -4 6 -3 0.19 0.14
 4 6 3 0.73 0.22
 4 6 3 0.61 0.18
 -4 -6 -3 0.2 0.12
 -4 6 3 0.35 0.15
 4 -6 3 0.24 0.15
 4 6 -3 0.36 0.15
 4 -6 3 0.34 0.24
 -4 7 -3 36.52 2.68
 4 7 3 46.27 3.14
 4 7 3 42.86 2.77
 -4 -7 3 37.81 2.59
 -4 -7 3 37.54 2.48
 4 -7 3 42.04 2.64
 4 -7 3 41.24 3.21
 4 7 -3 41.53 2.71
 -4 7 3 43.02 3.1
 4 8 3 0.07 0.17
 4 8 3 0.19 0.22
 -4 8 -3 0.09 0.15
 -4 -8 3 0.06 0.1
 -4 8 3 0.02 0.13
 4 -8 3 -0.12 0.27
 4 -8 3 -0.01 0.15
 4 8 -3 0.04 0.15
 4 9 3 17.87 1.39
 -4 9 -3 16.18 1.19
 4 9 3 18.78 1.29
 4 -9 3 17.2 1.53
 -4 9 3 16.82 1.35
 -4 9 3 14.32 1.21
 4 9 -3 16.77 1.22
 4 -9 3 17.83 1.19
 -4 10 -3 0.72 0.2
 4 10 3 0.44 0.26
 4 10 3 0.68 0.23
 4 10 -3 0.69 0.23
 4 -10 3 0.79 0.22
 -4 10 3 0.71 0.21
 -4 10 3 0.42 0.24
 4 -10 3 0.2 0.37
 4 -11 -3 8.72 1.55
 -4 11 -3 7.37 0.64
 4 11 3 8.31 0.76
 4 11 3 6.38 0.69
 4 11 3 7.76 0.76
 -4 11 3 7.78 0.7
 -4 11 3 8.34 0.73
 4 11 -3 8.11 0.7
 4 -11 3 9.24 0.69
 4 -11 3 7.94 0.98
 4 -12 -3 0.57 0.5
 4 12 3 0.48 0.25
 4 12 3 1.42 0.3
 4 12 3 1.1 0.33
 -4 12 -3 0.82 0.24
 4 -12 3 1.03 0.26
 4 -12 3 0.73 0.7
 4 12 -3 1.1 0.27
 4 -12 3 0.93 0.44
 -4 12 3 1.39 0.3
 -4 13 -3 43.8 2.84
 4 13 3 43.54 2.93
 4 13 3 41.75 3.29
 4 -13 -3 41.1 5.34
 4 -13 3 44.63 2.82
 4 -13 3 42.96 3.47
 -4 -13 -3 36.24 5.21
 -4 13 3 42.6 2.89
 4 13 -3 41.41 2.87
 4 -14 -3 4.78 1.42
 4 14 3 4.27 0.56
 4 14 3 4.95 0.6
 -4 -14 3 4.22 1.27
 4 14 3 4.77 0.41
 -4 -14 -3 4.1 1.28
 4 -14 3 5.83 0.84
 4 -14 3 4.83 0.53
 4 14 -3 4.3 0.52
 4 14 -3 4.97 0.42
 4 -14 3 2.18 0.94
 -4 14 3 4.93 0.55
 -4 -15 3 0.25 0.48
 4 15 3 0.39 0.2
 4 15 3 0.89 0.31
 4 -15 -3 0.82 0.57
 4 15 3 0.11 0.18
 4 15 -3 0.38 0.19
 -4 15 3 0.89 0.3
 4 -15 3 -0.18 0.55
 4 15 -3 0.63 0.21
 4 -15 3 0.29 0.26
 4 -15 3 0.86 0.5
 4 15 -3 0.44 0.26
 -4 -15 -3 0.61 0.53
 4 15 -3 0.26 0.21
 4 16 3 2.39 0.33
 4 16 3 2.46 0.34
 4 16 3 1.69 0.41
 -4 -16 3 1.74 0.71
 4 -16 -3 1.88 0.77
 4 16 -3 2.84 0.34
 -4 -16 -3 1.08 0.64
 4 -16 3 2.17 0.41
 4 -16 3 2.73 0.67
 4 16 -3 2.49 0.39
 4 -16 3 1.98 0.82
 -4 16 3 2.65 0.47
 4 16 -3 2.99 0.36
 4 16 -3 2.55 0.44
 4 -17 -3 18.09 2.09
 -4 -17 3 22.98 3.18
 4 -17 -3 24.81 3.27
 4 17 3 22.06 1.35
 4 17 3 21.97 1.35
 4 17 3 19.82 1.64
 -4 17 3 22 1.64
 4 17 -3 23.54 1.37
 4 -17 3 22.85 3.37
 4 17 -3 21.84 1.35
 -4 -17 -3 20.54 3.07
 4 -17 3 21.98 2.02
 4 17 -3 18.91 1.58
 4 18 3 4.47 0.42
 4 18 3 3.99 0.41
 -4 -18 3 2.11 0.84
 4 -18 -3 5.49 1.41
 -4 -18 -3 4.38 1.29
 4 18 -3 4.79 0.43
 4 18 -3 4.06 0.43
 4 -18 3 3.76 0.77
 4 -18 3 2.37 0.91
 -4 -19 3 1.22 0.62
 4 19 3 1.52 0.27
 4 -19 -3 1.28 0.63
 4 19 3 2.93 0.34
 4 19 -3 2.45 0.34
 4 19 -3 2.14 0.32
 4 -19 3 0.64 0.64
 4 20 3 0.32 0.19
 -4 -20 3 0.07 0.45
 4 -20 -3 0.41 0.47
 4 20 3 0.15 0.18
 4 -20 3 -0.05 0.47
 4 20 -3 -0.02 0.18
 4 20 -3 0.2 0.19
 -4 -21 3 18.62 2.63
 4 21 3 16.65 1.12
 4 21 3 19.23 1.13
 4 -21 3 17.04 2.59
 4 21 -3 16.55 1.12
 4 21 -3 18.28 1.12
 4 22 3 1.27 0.22
 4 22 3 1.07 0.21
 4 22 -3 1.35 0.23
 4 22 -3 1.48 0.22
 4 23 3 1.21 0.2
 4 23 3 0.81 0.19
 4 23 -3 0.8 0.19
 4 23 -3 1.78 0.25
 5 0 3 0.09 0.06
 -5 0 -3 0.1 0.08
 5 0 -3 -0.05 0.07
 5 0 3 0.06 0.07
 5 1 3 74.31 4.92
 5 1 3 83.86 5.87
 -5 1 -3 78.95 4.74
 5 1 3 80.47 4.74
 5 -1 3 73.94 4.93
 5 -1 3 82.01 5.91
 5 1 -3 75.18 4.73
 -5 -1 -3 80.2 4.75
 5 -1 3 79.11 4.74
 5 2 3 2.73 0.23
 5 2 3 2.47 0.29
 -5 -2 3 2.79 0.2
 -5 -2 -3 2.54 0.23
 5 -2 3 2.78 0.34
 5 2 -3 2.59 0.21
 5 -2 3 2.48 0.24
 5 -2 3 2.57 0.22
 5 2 -3 2.91 0.26
 -5 -3 3 5.53 0.37
 5 3 3 5.97 0.45
 5 3 3 6.2 0.51
 5 -3 -3 5.81 0.55
 5 -3 3 5.45 0.43
 5 -3 3 5.65 0.54
 5 3 -3 5.61 0.43
 -5 -3 -3 4.86 0.4
 5 3 -3 5.57 0.38
 5 -3 3 5.27 0.38
 5 4 3 0.23 0.15
 5 -4 -3 0.55 0.25
 -5 -4 3 0.38 0.07
 5 4 3 0.35 0.15
 5 -4 3 0.32 0.18
 5 -4 3 0.49 0.13
 5 -4 3 0.31 0.09
 5 4 -3 0.23 0.12
 -5 -4 -3 0.13 0.11
 5 5 3 31.6 1.97
 -5 -5 3 29.27 1.77
 5 5 3 30 2.25
 5 5 -3 29.51 1.94
 5 -5 3 31.61 1.79
 5 -5 3 28.3 1.89
 -5 -5 -3 24.03 1.8
 5 -5 3 28.08 2.29
 5 6 3 0.68 0.22
 -5 -6 3 0.88 0.13
 5 6 3 0.63 0.2
 5 -6 3 0.68 0.26
 5 -6 3 0.81 0.18
 5 -6 3 0.68 0.14
 5 6 -3 0.74 0.18
 5 7 3 7.12 0.66
 -5 -7 3 6.88 0.48
 -5 7 -3 6.45 0.56
 5 7 3 7.4 0.67
 5 -7 3 7.5 0.58
 5 -7 3 7.63 0.78
 -5 7 3 6.85 0.61
 5 7 -3 6.79 0.59
 5 -7 3 7.5 0.51
 5 8 3 0.18 0.18
 -5 8 -3 -0.12 0.14
 5 8 3 0.38 0.24
 5 8 -3 0.07 0.17
 5 -8 3 0.02 0.29
 -5 8 3 0.1 0.14
 5 -8 3 -0.01 0.16
 -5 9 -3 29.42 2.15
 5 9 3 33 2.25
 5 9 3 32.37 2.51
 5 -9 3 32.33 2.13
 -5 9 3 32.1 2.47
 5 -9 3 34.37 2.65
 5 9 -3 31.74 2.19
 5 10 3 0.35 0.21
 5 10 3 0.46 0.28
 -5 10 -3 0.44 0.19
 5 -10 3 0.2 0.67
 5 10 -3 0.63 0.23
 5 -10 3 0.25 0.19
 5 -10 3 0.48 0.37
 -5 10 3 0.41 0.24
 5 11 3 0.44 0.3
 5 -11 -3 1.19 0.5
 5 11 3 0.52 0.25
 5 11 3 0.55 0.27
 -5 11 -3 0.61 0.21
 5 -11 3 0.15 0.69
 -5 11 3 0.59 0.25
 5 -11 3 0.42 0.41
 5 -11 3 0.54 0.23
 5 11 -3 0.36 0.23
 5 12 3 0.21 0.21
 5 12 3 0.09 0.25
 5 12 3 -0.09 0.24
 -5 12 -3 0.08 0.17
 5 -12 -3 0.07 0.45
 5 -12 3 -0.02 0.63
 5 -12 3 0.05 0.35
 -5 12 3 0.03 0.23
 5 -12 3 0.41 0.22
 5 12 -3 0.12 0.22
 5 -13 -3 26.25 3.67
 5 13 3 26.88 2.19
 5 13 3 28.13 1.98
 -5 13 3 26.88 1.93
 5 -13 3 27.96 1.88
 5 -13 3 27.07 2.38
 5 13 -3 25.48 1.9
 5 -14 -3 0.15 0.53
 5 14 3 0.39 0.2
 5 14 3 0.08 0.17
 5 14 3 0.7 0.31
 5 14 3 0.28 0.26
 5 14 -3 0.59 0.26
 -5 -14 -3 0.22 0.48
 5 -14 3 0.02 0.59
 5 -14 3 0.7 0.48
 5 -14 3 0.25 0.24
 5 14 -3 0.31 0.18
 -5 14 3 0.36 0.26
 -5 -15 3 2.18 0.73
 5 15 3 3.11 0.35
 5 -15 -3 2 0.76
 5 15 3 3.01 0.36
 5 15 3 2.94 0.52
 5 -15 -3 1.91 0.8
 5 15 -3 3.39 0.36
 5 -15 3 2.89 0.66
 5 15 -3 3.56 0.37
 -5 -15 -3 1.47 0.66
 5 -15 3 2.45 0.43
 -5 15 3 3.22 0.5
 5 15 -3 3.43 0.42
 5 15 -3 3.6 0.46
 5 -16 -3 1.39 0.66
 5 -16 -3 1.31 0.65
 5 16 3 1.41 0.25
 5 16 3 1 0.23
 -5 -16 3 0.45 0.55
 5 16 3 1.31 0.38
 -5 16 3 0.53 0.32
 5 16 -3 1.38 0.33
 5 16 -3 1.17 0.24
 -5 -16 -3 0.75 0.57
 5 16 -3 1.09 0.26
 5 -16 3 1.69 0.56
 5 16 -3 1.16 0.24
 5 -16 3 0.65 0.68
 5 17 3 23.51 1.41
 -5 -17 3 25.04 3.34
 5 17 3 21.1 1.71
 5 17 3 22.84 1.4
 5 -17 -3 18.73 2.14
 5 -17 -3 25.27 3.36
 -5 -17 -3 22.48 3.23
 5 -17 3 19.75 3.37
 5 -17 3 19.29 2.06
 5 17 -3 22.03 1.56
 -5 17 3 24.19 1.7
 5 17 -3 21.62 1.66
 5 17 -3 23.81 1.42
 5 17 -3 23.47 1.41
 5 18 3 0.36 0.19
 5 18 3 0.45 0.19
 -5 -18 3 0.22 0.5
 5 -18 -3 0.01 0.52
 5 -18 3 0.22 0.61
 5 18 -3 0.03 0.18
 5 18 -3 0.36 0.2
 -5 -18 -3 0.31 0.49
 5 -19 -3 0.06 0.49
 5 19 3 -0.06 0.19
 5 19 3 0.42 0.2
 -5 -19 3 -0.02 0.47
 5 19 -3 0.33 0.19
 5 19 -3 0.21 0.18
 5 -19 3 0.12 0.57
 5 -20 -3 0.2 0.43
 5 20 3 0.41 0.19
 -5 -20 3 -0.26 0.41
 5 20 3 0.11 0.19
 5 20 -3 -0.01 0.18
 5 20 -3 0.41 0.2
 5 -20 3 0.06 0.47
 5 21 3 7.92 0.58
 -5 -21 3 6.77 1.48
 5 21 3 6.82 0.55
 5 21 -3 7.8 0.57
 5 21 -3 7.03 0.56
 5 -21 3 7.4 1.54
 5 22 3 0.13 0.16
 5 22 3 0.05 0.15
 5 22 -3 0.21 0.16
 5 22 -3 0.06 0.15
 5 23 3 0.09 0.13
 5 23 3 0.04 0.14
 5 23 -3 -0.14 0.12
 5 23 -3 -0.11 0.14
 6 0 -3 0.06 0.08
 6 0 3 0.11 0.07
 6 0 3 0.04 0.08
 -6 0 -3 -0.03 0.09
 6 1 3 28.46 1.8
 6 -1 -3 26.61 1.75
 6 1 3 29.12 1.75
 -6 1 -3 28.81 1.76
 -6 -1 -3 29.39 1.76
 6 1 -3 27.58 1.74
 6 -1 3 31.35 2.2
 6 -1 3 28.65 1.75
 6 -1 3 26.25 1.81
 6 -2 -3 1.41 0.28
 6 2 3 1.13 0.16
 6 2 3 1.08 0.22
 6 2 3 1.33 0.18
 6 2 -3 1.01 0.14
 -6 -2 -3 1.22 0.18
 6 -2 3 1.04 0.14
 6 -2 3 1.26 0.23
 6 -2 3 0.97 0.14
 -6 -3 3 14.09 0.9
 6 3 3 14.3 1.15
 6 -3 -3 16.68 1.2
 6 3 3 15.88 1
 6 3 -3 14.39 0.91
 6 -3 3 14.06 0.91
 -6 -3 -3 13.9 0.93
 6 3 -3 14.52 0.99
 6 -3 3 13.01 0.96
 6 -3 3 14.19 1.19
 6 -4 -3 19.3 1.43
 6 4 3 18.44 1.19
 -6 -4 3 16.81 1.06
 6 4 3 16.62 1.35
 6 -4 3 15.77 1.14
 -6 -4 -3 14.84 1.09
 6 4 -3 17.55 1.17
 6 -4 3 16.46 1.07
 6 4 -3 17.17 1.07
 6 -4 3 18.32 1.4
 6 -5 -3 12.46 1.11
 6 5 3 11.13 0.99
 -6 -5 3 11.49 0.76
 6 5 3 13.17 0.9
 6 -5 3 11.78 0.78
 6 5 -3 12.51 0.87
 6 -5 3 12.26 1.05
 6 -5 3 11.37 0.84
 6 6 3 23.07 1.86
 6 6 3 24.54 1.66
 -6 -6 3 22.32 1.46
 6 -6 -3 26.5 2.03
 6 6 -3 23.51 1.61
 6 -6 3 23.66 1.58
 6 -6 3 24 1.48
 6 -6 3 22.88 1.93
 6 7 3 3.59 0.45
 6 7 3 4.04 0.49
 6 7 -3 4.41 0.43
 6 -7 3 3.8 0.33
 6 -7 3 4.07 0.41
 6 -7 3 5.21 0.63
 -6 7 3 3.28 0.4
 -6 8 -3 3.39 0.38
 6 8 3 3.54 0.43
 6 8 3 3.25 0.5
 6 8 -3 3.49 0.41
 6 -8 3 3.91 0.6
 -6 8 3 3.39 0.38
 6 -8 3 3.48 0.4
 6 9 3 16.43 1.3
 -6 9 -3 15.9 1.2
 6 9 3 18.49 1.42
 6 -9 3 17.78 1.22
 6 -9 3 17.57 1.55
 6 9 -3 16.01 1.23
 6 10 3 12.18 1.04
 6 10 3 11.03 0.96
 6 -10 -3 16.76 2.01
 6 10 3 12.89 1.08
 -6 10 -3 11.34 0.91
 6 -10 3 7.32 2.18
 6 -10 3 12.25 1.24
 6 10 -3 12.51 0.96
 6 -10 3 13.82 0.95
 -6 10 3 11.78 0.97
 6 11 3 4.49 0.61
 6 -11 -3 5.1 1.31
 6 11 3 4.08 0.53
 6 11 3 3.69 0.52
 6 -11 3 4.85 0.74
 6 -11 3 5.28 0.5
 6 11 -3 4.4 0.5
 -6 11 3 4.06 0.51
 6 -12 -3 0.43 0.51
 6 12 3 0.27 0.27
 6 12 3 0.26 0.32
 6 12 3 0.35 0.24
 6 -12 -3 -0.36 0.51
 6 12 -3 0.24 0.23
 6 -12 3 1.07 0.28
 -6 12 3 0.18 0.25
 6 -12 3 0.18 0.63
 6 -12 3 0.21 0.41
 6 -13 -3 9.82 1.35
 6 -13 -3 11.73 1.97
 6 13 3 9.74 0.92
 6 13 3 9.74 0.67
 6 13 3 8.59 0.83
 6 13 -3 9.59 0.67
 6 -13 3 10.26 0.83
 6 -13 3 10.05 1.13
 -6 13 3 9.66 0.85
 6 13 -3 7.91 0.8
 6 14 3 3.47 0.55
 6 14 3 3.21 0.41
 6 14 3 3.74 0.37
 -6 -14 3 2.97 0.43
 6 14 3 3.38 0.36
 6 -14 -3 2.58 0.87
 6 -14 -3 3.93 0.95
 6 14 -3 3.4 0.38
 -6 -14 -3 3.37 0.47
 6 -14 3 3.34 0.45
 6 -14 3 4.31 0.75
 6 14 -3 3.65 0.49
 -6 -14 -3 1.64 0.71
 6 14 -3 3.4 0.42
 -6 14 3 3.29 0.5
 6 14 -3 3.68 0.37
 6 -14 3 1.69 0.88
 6 15 3 1.67 0.27
 6 15 3 2.24 0.37
 6 -15 -3 2.15 0.77
 6 -15 -3 1.39 0.72
 -6 -15 3 1.31 0.63
 6 15 3 2.49 0.49
 6 15 3 2.13 0.33
 6 15 -3 2.49 0.33
 6 -15 3 1.71 0.58
 -6 15 3 2.25 0.43
 6 15 -3 2.12 0.32
 -6 -15 -3 1.43 0.62
 6 15 -3 2.65 0.34
 6 15 -3 1.68 0.38
 6 -15 3 2.53 0.43
 6 -15 3 0.73 0.75
 -6 -16 3 1.58 0.67
 6 16 3 2.57 0.34
 6 16 3 2.11 0.34
 6 -16 -3 2.29 0.77
 6 -16 -3 1.82 0.76
 6 16 3 2.14 0.47
 6 16 -3 2.17 0.34
 6 16 -3 2.68 0.34
 -6 -16 -3 1.11 0.63
 6 -16 3 1.91 0.63
 6 16 -3 1.62 0.31
 -6 16 3 2.64 0.46
 6 16 -3 2.63 0.44
 6 -16 3 0.1 0.75
 6 17 3 5.57 0.68
 6 17 3 5.64 0.5
 6 -17 -3 5.29 1.61
 6 -17 -3 5.82 1.07
 -6 -17 3 6.13 1.54
 6 17 3 5.56 0.5
 6 17 -3 6.51 0.52
 6 -17 3 3.55 1.21
 -6 -17 -3 6.73 1.5
 6 17 -3 5.8 0.62
 6 -17 3 4.58 0.93
 6 17 -3 5.96 0.5
 6 17 -3 5.15 0.55
 -6 17 3 5.74 0.69
 6 18 3 1.51 0.25
 -6 -18 3 1.19 0.63
 6 -18 -3 0.98 0.61
 6 18 3 1.61 0.26
 6 18 -3 1.69 0.26
 6 -18 3 0.24 0.68
 6 18 -3 1.71 0.28
 6 18 -3 1.43 0.31
 -6 -19 3 0.88 0.58
 6 19 3 1.55 0.25
 6 19 3 0.79 0.23
 6 -19 -3 0.63 0.52
 6 19 -3 1.62 0.3
 6 19 -3 1.46 0.23
 6 19 -3 1.4 0.26
 6 -19 3 0.56 0.59
 6 20 3 2.88 0.35
 6 -20 -3 3.77 1.15
 6 20 3 3.42 0.37
 -6 -20 3 1.55 0.64
 6 -20 3 1.67 0.75
 6 20 -3 3.52 0.36
 6 20 -3 2.77 0.35
 -6 -21 3 11.03 1.83
 6 21 3 11.11 0.73
 6 21 3 9.39 0.72
 6 21 -3 10.17 0.73
 6 21 -3 11.08 0.72
 6 -21 3 10.3 1.82
 6 22 3 3.94 0.35
 6 22 3 3.22 0.33
 6 22 -3 2.37 0.32
 6 22 -3 3.57 0.34
 6 23 3 -0.14 0.12
 6 23 3 0.02 0.14
 6 23 -3 -0.06 0.12
 6 23 -3 0.01 0.14
 7 0 3 -0.01 0.07
 7 0 3 -0.01 0.08
 -7 0 -3 0.02 0.1
 7 0 -3 -0.01 0.09
 -7 1 -3 39.72 2.26
 7 1 3 37.91 2.24
 7 -1 -3 39.16 2.79
 7 -1 -3 34.6 2.24
 7 1 3 34.76 2.31
 -7 -1 -3 36.26 2.25
 7 -1 3 37.29 2.24
 7 1 -3 35.47 2.23
 7 -1 3 34.47 2.32
 7 -2 -3 105.72 7.53
 7 2 3 100.78 6.05
 7 -2 -3 94.69 6.05
 7 2 3 108.95 6.47
 7 -2 3 93.23 6.3
 7 -2 3 105.76 7.55
 7 2 -3 98.6 6.04
 7 -2 3 97.62 6.05
 -7 -2 -3 97.28 6.06
 7 3 3 12.59 0.83
 7 3 3 13.92 0.89
 -7 -3 3 12.12 0.81
 7 -3 -3 13.52 1.07
 7 -3 3 12.67 1.07
 7 -3 3 12.01 0.82
 7 -3 3 11.82 0.86
 7 3 -3 13 0.82
 7 3 -3 13.06 0.89
 -7 -4 3 1.87 0.18
 7 -4 -3 2.46 0.39
 7 4 3 1.72 0.31
 7 4 3 1.97 0.27
 7 -4 3 1.77 0.2
 7 4 -3 1.97 0.26
 7 4 -3 1.9 0.2
 7 -4 3 1.93 0.36
 7 -4 3 1.66 0.25
 7 5 3 5.22 0.55
 -7 -5 3 5.26 0.39
 7 -5 -3 5 0.64
 7 5 3 6.74 0.52
 7 5 -3 5.2 0.47
 7 -5 3 5.37 0.41
 7 -5 3 5.65 0.61
 7 -5 3 5.65 0.47
 7 -6 -3 28.35 2.2
 7 6 3 28.52 1.82
 7 6 3 23.62 2.05
 -7 -6 3 24.16 1.61
 7 -6 3 26.05 2.12
 7 6 -3 26.97 1.78
 7 -6 3 25.47 1.73
 7 -6 3 26.79 1.64
 7 7 3 4.52 0.53
 7 -7 -3 4.91 0.8
 7 7 3 4.65 0.54
 7 -7 3 4.76 0.45
 7 7 -3 4.65 0.47
 7 -7 3 4.96 0.65
 7 8 3 0.34 0.26
 7 8 3 0.12 0.2
 7 -8 -3 0.64 0.48
 7 -8 3 0.47 0.18
 7 -8 3 0.11 0.33
 7 8 -3 0.14 0.19
 7 9 3 26.42 1.99
 7 9 3 22.78 1.79
 7 -9 -3 20.86 2.24
 7 -9 3 23.44 2.11
 7 -9 3 27.57 1.7
 7 -9 3 25.34 3.58
 7 9 -3 23.4 1.72
 7 10 3 15.29 1.23
 7 -10 -3 14.71 2.2
 7 -10 -3 12.24 1.56
 7 10 3 13.64 1.16
 7 10 3 12.57 1.07
 7 -10 3 14.31 1.39
 7 -10 3 12.27 2.52
 7 10 -3 13.49 1.07
 7 -10 3 15.61 1.06
 7 11 3 8.85 0.86
 7 11 3 7.51 0.76
 7 -11 -3 7.94 1.74
 7 11 3 8.31 0.83
 7 -11 -3 7.51 1.25
 7 11 -3 8.48 0.75
 7 -11 3 10.57 1.09
 7 -11 3 9.38 0.75
 -7 11 3 7.64 0.75
 7 -12 -3 1.48 0.64
 7 -12 -3 2.49 0.79
 7 12 3 2.67 0.5
 7 12 3 1.91 0.37
 -7 12 3 2.53 0.43
 7 -12 3 2.3 0.39
 7 -12 3 2.43 0.61
 7 12 -3 2.29 0.41
 7 -12 3 0.65 0.8
 7 13 3 38.44 2.77
 7 13 3 37.42 2.27
 7 -13 -3 39.07 3.44
 7 -13 -3 39.98 5.04
 -7 -13 3 38.76 2.32
 7 -13 3 40.22 3.29
 -7 13 3 38.87 2.69
 -7 -13 -3 39.06 2.31
 7 -13 3 41.27 2.63
 7 13 -3 36.27 2.27
 7 13 -3 37.44 2.68
 7 -14 -3 26.36 3.46
 7 14 3 21.49 1.43
 7 14 3 24.1 1.81
 7 14 3 25.55 1.45
 -7 -14 3 22.67 1.48
 7 -14 -3 24.27 2.35
 7 14 3 21.61 1.6
 7 14 -3 22.14 1.61
 7 14 -3 21.85 1.43
 7 14 -3 24.02 1.45
 7 -14 3 24.39 2.19
 7 14 -3 21.87 1.71
 -7 -14 -3 24.55 1.48
 -7 14 3 23.8 1.74
 7 -14 3 26 1.71
 7 -15 -3 3.42 1.03
 7 15 3 4.7 0.67
 7 15 3 5.43 0.47
 -7 -15 3 4.56 0.52
 7 15 3 5.16 0.45
 7 15 3 4.91 0.52
 7 -15 -3 5.42 1.09
 -7 15 3 4.88 0.62
 7 15 -3 4.6 0.56
 7 -15 3 5.55 0.91
 -7 -15 -3 2.75 0.92
 7 15 -3 5.29 0.46
 7 -15 3 4.97 0.59
 7 15 -3 5.76 0.54
 7 15 -3 5.87 0.47
 -7 -15 -3 4.42 0.53
 7 16 3 7.76 0.69
 7 -16 -3 7.88 1.22
 -7 -16 3 8.36 1.77
 7 -16 -3 7.94 1.88
 7 16 3 8.62 0.63
 7 16 3 8.43 0.63
 7 16 3 7.9 0.85
 7 -16 3 8.38 1.11
 7 16 -3 9.96 0.66
 7 16 -3 7.97 0.62
 7 16 -3 7.51 0.76
 7 -16 3 4.43 1.54
 7 16 -3 8.15 0.71
 -7 16 3 8.94 0.83
 -7 -16 -3 7.58 1.68
 7 17 3 24.75 1.48
 7 17 3 22.99 1.64
 7 -17 -3 20.82 2.26
 7 -17 -3 24.77 3.43
 -7 -17 3 28.54 3.5
 7 17 3 23.51 1.47
 7 17 3 20.89 1.78
 7 -17 3 24.49 2.23
 -7 -17 -3 22.96 3.36
 7 17 -3 23.13 1.65
 7 17 -3 21.31 1.73
 7 17 -3 24.91 1.48
 7 -17 3 21.74 3.6
 -7 17 3 24.82 1.8
 7 17 -3 25.52 1.49
 -7 -18 3 15.99 2.54
 7 18 3 15.87 1.02
 7 18 3 16.95 1.03
 7 -18 -3 15.56 2.5
 7 18 -3 15.46 1.01
 7 18 -3 14.27 1.01
 7 -18 3 13.43 2.57
 7 18 -3 14.58 1.13
 7 19 3 1 0.24
 -7 -19 3 0.54 0.56
 7 -19 -3 0.84 0.57
 7 19 3 1.32 0.23
 7 19 -3 1.05 0.29
 7 19 -3 0.63 0.21
 7 -19 3 0.51 0.63
 7 19 -3 0.55 0.21
 -7 -20 3 2.06 0.72
 7 20 3 3.45 0.37
 7 -20 -3 4.52 1.2
 7 20 3 3.61 0.37
 7 20 -3 2.88 0.41
 7 20 -3 3.39 0.35
 7 20 -3 3.22 0.36
 7 -20 3 1.42 0.7
 -7 -21 3 18.52 2.65
 7 21 3 18.92 1.14
 7 21 3 16.91 1.13
 7 21 -3 18.74 1.13
 7 21 -3 17.92 1.14
 7 -21 3 18.47 2.62
 7 22 3 2.19 0.28
 7 22 3 2.1 0.27
 7 22 -3 1.04 0.21
 7 22 -3 2.13 0.26
 7 23 3 1.97 0.24
 7 23 3 1.54 0.25
 7 23 -3 2.04 0.25
 7 23 -3 1.9 0.24
 8 0 3 0.18 0.1
 8 0 3 0.06 0.07
 8 0 -3 0.06 0.1
 8 -1 -3 13.68 0.99
 8 -1 -3 11.34 0.78
 8 1 3 12.66 0.79
 8 1 3 11.42 0.78
 8 -1 3 11.32 0.8
 8 1 -3 11.39 0.78
 8 -1 3 12.61 0.79
 8 2 3 63.47 3.85
 8 -2 -3 64.79 4.5
 8 -2 -3 54.01 3.61
 8 2 3 61.37 3.61
 8 2 -3 58.33 3.6
 8 -2 3 54.78 3.74
 8 -2 3 60.01 3.61
 8 -2 3 57.16 4.5
 8 3 3 8.66 0.61
 8 -3 -3 9.14 0.76
 8 3 3 7.83 0.57
 8 -3 -3 7.51 0.58
 8 -3 3 8.16 0.59
 8 -3 3 8.61 0.76
 8 -3 3 7.85 0.56
 8 3 -3 8.2 0.56
 8 -4 -3 10.9 0.91
 8 4 3 11.26 0.74
 -8 -4 3 9.61 0.65
 8 -4 3 9.42 0.88
 8 4 -3 9.29 0.65
 8 -4 3 9 0.7
 8 -4 3 8.74 0.66
 8 4 -3 10.36 0.73
 8 -5 -3 2.02 0.38
 8 5 3 1.87 0.3
 8 -5 3 1.52 0.32
 8 -5 3 1.15 0.21
 8 5 -3 1.48 0.24
 8 -6 -3 14.24 1.2
 8 6 3 12.67 0.94
 8 -6 3 12.78 1.12
 8 -6 3 11.11 0.88
 8 6 -3 11.53 0.91
 8 -7 -3 1.37 0.45
 8 7 3 1.2 0.3
 8 -7 3 1.29 0.25
 8 7 -3 1.43 0.27
 8 -7 3 1.67 0.4
 8 -8 -3 0.32 0.43
 8 8 3 0.59 0.29
 8 8 -3 0.57 0.22
 8 -8 3 0.26 0.19
 8 -8 3 0.52 0.34
 8 9 3 8.82 0.87
 8 9 3 8.81 0.78
 8 -9 -3 9.95 1.62
 8 -9 -3 7.83 1.16
 8 9 -3 9.21 0.79
 8 -9 3 10.34 0.78
 8 -9 3 11.3 2.02
 8 -9 3 9.18 1.04
 8 10 3 22.43 1.81
 8 -10 -3 25.94 3.28
 8 10 3 23.1 1.76
 8 -10 -3 20.49 2.28
 8 -10 3 25.03 2.16
 8 -10 3 24.47 3.66
 8 10 -3 24.72 1.75
 8 -10 3 27.87 1.72
 8 11 3 0.59 0.31
 8 -11 -3 0.35 0.46
 8 11 3 0.59 0.37
 8 -11 -3 -0.04 0.58
 8 -11 3 0.31 0.69
 8 -11 3 0.71 0.45
 8 -11 3 1.03 0.27
 8 11 -3 1.39 0.32
 -8 11 3 0.85 0.31
 8 12 3 4.94 0.66
 8 12 3 3.44 0.55
 8 -12 -3 4.33 0.98
 8 -12 -3 2.4 0.81
 8 12 -3 3.74 0.39
 8 -12 3 5.09 0.81
 8 12 -3 4.32 0.52
 8 -12 3 2.08 1.08
 8 -12 3 4.58 0.49
 -8 12 3 4.17 0.54
 8 13 3 6.3 0.5
 8 13 3 6.25 0.51
 8 13 3 5.93 0.57
 8 13 3 7.31 0.79
 -8 -13 3 6.57 0.58
 8 -13 -3 5.32 1.14
 8 -13 -3 7.04 1.65
 -8 -13 3 4.56 0.5
 8 13 -3 6.03 0.51
 8 13 -3 5.93 0.51
 -8 -13 -3 6.99 0.59
 8 13 -3 5.77 0.63
 8 -13 3 7.51 1.01
 -8 -13 -3 5.25 0.51
 8 13 -3 6.24 0.58
 -8 13 3 6.37 0.68
 8 -13 3 6.79 0.64
 -8 -14 3 9.36 0.73
 8 14 3 9.06 0.66
 8 14 3 9.23 0.94
 8 -14 -3 8.41 1.33
 8 -14 -3 8.92 1.88
 8 14 3 9.17 0.75
 8 14 3 9.35 0.67
 8 -14 3 9.59 0.82
 8 14 -3 8.99 0.75
 8 -14 3 7.94 1.15
 8 14 -3 10.02 0.68
 -8 -14 -3 6.8 0.64
 -8 14 3 8.81 0.86
 8 14 -3 9.74 0.67
 -8 -14 -3 8.45 0.71
 8 14 -3 7.94 0.81
 8 -15 -3 -0.29 0.59
 8 15 3 0.32 0.34
 8 15 3 -0.1 0.19
 8 -15 -3 0.18 0.56
 8 15 3 0.16 0.2
 -8 -15 3 -0.13 0.27
 8 15 3 0.13 0.2
 8 15 -3 0.16 0.21
 8 15 -3 0.19 0.2
 8 15 -3 0.04 0.26
 8 15 -3 0.32 0.21
 -8 -15 -3 0.17 0.28
 8 -15 3 -0.02 0.5
 -8 15 3 -0.3 0.28
 8 -15 3 0.11 0.76
 8 16 3 0.57 0.22
 8 16 3 0.42 0.23
 -8 -16 3 0.23 0.3
 8 -16 -3 0.25 0.55
 -8 -16 3 0.02 0.51
 8 16 3 0.55 0.39
 8 -16 -3 0.14 0.6
 8 16 3 0.45 0.21
 8 16 -3 0.28 0.29
 -8 -16 -3 0.58 0.29
 8 16 -3 0.32 0.21
 -8 16 3 0.56 0.34
 8 -16 3 0.04 0.52
 8 -16 3 -0.27 0.68
 -8 -16 -3 0.5 0.56
 8 16 -3 0.21 0.23
 8 16 -3 0.37 0.21
 8 17 3 5.14 0.6
 8 -17 -3 6.23 1.72
 8 17 3 6.55 0.55
 8 17 3 6.24 0.54
 -8 -17 3 7.31 1.64
 -8 -17 -3 5.49 1.6
 8 17 -3 6.25 0.54
 8 17 -3 6.09 0.6
 8 17 -3 7.36 0.56
 8 18 3 9.35 0.66
 8 18 3 9.23 0.67
 8 18 3 8.21 0.73
 -8 -18 3 8.35 1.82
 8 -18 -3 7.89 1.79
 8 18 -3 8.94 0.66
 8 18 -3 8.17 0.64
 8 18 -3 8.94 0.74
 8 -18 3 5.87 1.95
 8 19 3 0.18 0.19
 8 -19 -3 0.14 0.44
 8 19 3 0.16 0.18
 -8 -19 3 -0.15 0.49
 8 19 -3 0.02 0.18
 8 -19 3 -0.33 0.52
 8 19 -3 0.31 0.19
 8 19 -3 -0.11 0.24
 8 -20 -3 7.05 1.33
 -8 -20 3 5.8 1.43
 8 20 3 4.78 0.46
 8 20 3 5.42 0.47
 8 20 -3 4.92 0.52
 8 20 -3 6.01 0.46
 8 20 -3 5.26 0.47
 8 21 3 1.93 0.29
 8 21 3 2.33 0.29
 8 -21 3 0.94 0.52
 8 21 -3 1.73 0.27
 8 21 -3 2.13 0.28
 8 22 3 2 0.26
 8 22 3 2.02 0.27
 8 22 -3 1.89 0.26
 8 22 -3 2.12 0.26
 9 0 3 0.16 0.08
 9 0 -3 0.17 0.11
 9 -1 -3 11.68 0.78
 9 1 -3 11.85 0.78
 9 -1 3 11.64 0.79
 9 -2 -3 241.96 16.65
 9 -2 3 206.24 13.93
 9 2 -3 215.29 13.38
 9 -2 3 228.08 16.67
 9 -3 -3 5.85 0.58
 9 3 3 5.33 0.44
 9 3 -3 5.18 0.4
 9 -3 3 4.82 0.56
 9 -3 3 5.39 0.42
 9 4 3 6.97 0.52
 9 -4 -3 6.43 0.66
 9 4 -3 5.66 0.45
 9 -4 3 5.79 0.49
 9 -4 3 6.68 0.67
 9 -5 -3 15.97 1.3
 9 5 3 15.71 1.06
 9 -5 3 14.96 1.27
 9 5 -3 13.81 1.04
 9 -5 3 12.84 1.01
 9 6 3 76.52 4.73
 9 -6 -3 79.11 5.56
 9 6 -3 71.41 4.7
 9 -6 3 68.86 5.5
 9 -6 3 63.55 4.56
 9 7 3 2.47 0.41
 9 -7 -3 2.67 0.58
 9 -7 3 2.29 0.46
 9 -7 3 2.8 0.35
 9 7 -3 2.32 0.38
 9 8 3 2 0.4
 9 -8 -3 1.99 0.59
 9 -8 -3 3.95 0.99
 9 8 3 1.57 0.31
 9 -8 3 1.73 0.6
 9 8 -3 2.13 0.35
 9 -8 3 1.76 0.3
 9 -8 3 1.54 0.45
 9 -9 -3 7.08 1.33
 9 -9 -3 4.66 0.96
 9 9 3 4.8 0.64
 9 9 3 4.62 0.53
 9 -9 3 4.88 1.53
 9 -9 3 5.98 0.55
 9 -9 3 5.51 0.78
 9 9 -3 5.22 0.56
 9 -10 -3 61.5 6.12
 9 -10 -3 83.08 9.17
 9 10 3 69.18 5.17
 9 10 3 76.87 5.22
 9 -10 3 87.79 4.99
 9 10 -3 74.35 5.1
 9 -10 3 79.25 6.06
 9 -10 3 81.56 9.53
 9 11 3 1.35 0.35
 9 -11 -3 1.23 0.69
 9 -11 -3 1.15 0.55
 9 -11 -3 2.41 0.73
 9 11 3 0.88 0.38
 9 -11 3 1.2 0.52
 9 -11 3 1.1 0.29
 -9 11 3 1.12 0.35
 9 11 -3 1.12 0.31
 9 -11 3 0.66 0.74
 9 12 3 15.01 1.32
 9 -12 -3 15.07 2.5
 -9 -12 3 15.75 1.05
 9 -12 -3 13.75 1.71
 9 -12 -3 13.3 1.74
 9 12 3 15.67 0.99
 9 12 3 15.55 1.24
 9 12 -3 15.08 1
 9 -12 3 16.71 1.2
 9 12 -3 13.45 1.11
 -9 -12 -3 16.11 1.05
 9 12 -3 15.39 1.22
 -9 12 3 16.43 1.24
 9 -12 3 9.76 2.84
 9 -12 3 18.11 1.66
 9 13 3 0.33 0.2
 9 -13 -3 0.57 0.73
 -9 -13 3 0.46 0.28
 9 13 3 0.36 0.39
 9 -13 -3 -0.08 0.49
 9 13 3 0.59 0.2
 9 13 3 0.5 0.23
 -9 -13 3 0.39 0.23
 9 13 -3 0.36 0.21
 9 -13 3 0.36 0.27
 9 -13 3 0.13 0.76
 9 13 -3 0.39 0.22
 9 13 -3 0.45 0.29
 -9 -13 -3 0.49 0.24
 -9 13 3 0.6 0.32
 9 -13 3 -0.01 0.51
 9 13 -3 0.64 0.24
 -9 -13 -3 0.23 0.26
 -9 -14 3 30.78 1.98
 9 14 3 37.22 2.02
 9 14 3 33.54 2.25
 -9 -14 3 35.23 2.07
 9 -14 -3 34.28 4.53
 9 -14 -3 27.55 3.08
 9 14 3 31.87 2
 9 14 3 31.22 2.46
 9 14 -3 35.07 2.26
 9 14 -3 36.84 2.02
 -9 -14 -3 29.98 2
 9 14 -3 33.72 2.02
 -9 14 3 35.77 2.41
 9 -14 3 23.74 4.8
 9 -14 3 35.59 2.34
 -9 -14 -3 34.74 2.05
 9 14 -3 32.87 2.38
 9 -14 3 37.31 3.01
 9 -15 -3 0.19 0.72
 9 -15 -3 0.18 0.55
 9 15 3 0.08 0.21
 9 15 3 -0.05 0.35
 9 15 3 0.13 0.21
 9 15 3 0.17 0.21
 -9 -15 3 -0.36 0.28
 9 15 -3 -0.09 0.2
 9 15 -3 -0.09 0.19
 -9 -15 -3 -0.16 0.28
 9 15 -3 0.06 0.22
 9 -15 3 -0.65 0.73
 9 -15 3 0.25 0.52
 9 15 -3 0.28 0.29
 -9 15 3 0.44 0.34
 -9 -16 3 7.57 0.69
 9 16 3 7.6 0.63
 9 -16 -3 8.35 1.91
 9 16 3 6.98 0.86
 9 -16 -3 6.21 1.29
 9 16 3 7.69 0.71
 9 16 3 7.58 0.62
 9 16 -3 8.25 0.63
 -9 -16 -3 7.57 1.73
 -9 -16 -3 7.17 0.69
 9 -16 3 7.89 1.12
 9 16 -3 7.73 0.7
 9 16 -3 8.21 0.62
 9 16 -3 8.19 0.78
 -9 16 3 9.34 0.86
 9 17 3 0.15 0.2
 9 17 3 0.39 0.21
 -9 -17 3 0.59 0.56
 9 -17 -3 0.2 0.58
 9 17 3 0.1 0.23
 9 17 -3 0.15 0.2
 9 -17 3 -0.91 0.7
 9 17 -3 0.24 0.2
 -9 -17 -3 -0.17 0.27
 9 17 -3 0.09 0.22
 9 -18 -3 24.87 3.82
 9 18 3 30.2 1.73
 9 18 3 29.95 1.73
 -9 -18 3 30.66 3.96
 9 18 3 27.55 1.93
 9 18 -3 28.78 1.94
 9 18 -3 29.16 1.72
 9 18 -3 28.73 1.73
 9 -18 3 21.44 3.96
 9 19 3 0.08 0.17
 9 19 3 0.26 0.18
 9 19 3 0.51 0.25
 -9 -19 3 0.28 0.48
 9 -19 -3 0.25 0.47
 9 19 -3 0.27 0.18
 9 19 -3 -0.06 0.17
 9 -19 3 -0.36 0.55
 9 19 -3 0.37 0.25
 -9 -20 3 6.29 1.49
 9 20 3 6.1 0.49
 9 20 3 6.39 0.49
 9 20 -3 5.48 0.49
 9 20 -3 6.24 0.48
 9 20 -3 5.71 0.57
 9 21 3 0.49 0.16
 9 21 3 0.73 0.18
 9 21 -3 0.17 0.2
 9 21 -3 0.44 0.15
 9 21 -3 0.4 0.16
 9 22 3 10.79 0.73
 9 22 -3 11.01 0.73
 9 22 -3 11.78 0.71
 10 -2 -3 52.76 3.79
 10 -2 3 46.64 3.14
 10 -3 -3 0.22 0.2
 10 -3 3 0.08 0.12
 10 -3 3 0.12 0.21
 10 -4 -3 0.09 0.23
 10 4 3 0.38 0.15
 10 -4 3 0.19 0.14
 10 -4 3 0.14 0.21
 10 5 3 16.06 1.03
 10 -5 -3 14.33 1.24
 10 -5 3 12.52 0.97
 10 -5 3 12.73 1.22
 10 6 3 2.19 0.37
 10 -6 -3 2.55 0.53
 10 6 3 3.51 0.4
 10 -6 3 2.66 0.35
 10 -6 3 2.35 0.48
 10 6 -3 3.48 0.39
 10 -7 -3 0.51 0.29
 10 -7 -3 0.6 0.39
 10 7 3 -0.01 0.21
 10 7 3 0.27 0.23
 10 -7 3 0.18 0.19
 10 -7 3 0.21 0.31
 10 -7 3 0.33 0.35
 10 7 -3 0.37 0.21
 10 -8 -3 0.5 0.33
 10 8 3 0.18 0.28
 10 8 3 0.33 0.25
 10 -8 -3 0.33 0.47
 10 -8 3 0.65 0.36
 10 -8 3 0.23 0.2
 10 8 -3 0.38 0.23
 10 -8 3 0.67 0.44
 10 9 3 0.92 0.37
 10 -9 -3 0.72 0.55
 10 9 3 0.2 0.27
 10 -9 -3 0.48 0.41
 10 -9 3 0.52 0.41
 10 -9 3 0.58 0.52
 10 -9 3 0.82 0.25
 10 9 -3 0.95 0.28
 10 -10 -3 6.38 0.99
 10 10 3 5.92 0.75
 10 -10 -3 8.17 1.58
 10 -10 -3 5.71 1.14
 10 10 3 6.5 0.66
 10 -10 3 6 0.93
 10 -10 3 5.72 0.9
 10 -10 3 7.44 0.65
 10 10 -3 6.34 0.66
 10 -10 3 6.93 1.89
 10 11 3 0.03 0.3
 -10 -11 3 0.39 0.26
 10 -11 -3 -0.13 0.61
 10 11 3 0.08 0.37
 10 -11 -3 0.43 0.71
 10 11 3 0.44 0.19
 10 -11 -3 0.16 0.43
 -10 -11 -3 0.36 0.23
 10 11 -3 0.02 0.25
 10 11 -3 0.47 0.2
 10 -11 3 0.3 0.23
 10 -11 3 -0.52 0.44
 10 -11 3 0.07 0.66
 10 -12 -3 0.78 0.8
 -10 -12 3 1.25 0.31
 10 12 3 2.25 0.54
 10 12 3 1.15 0.39
 10 12 3 1.58 0.3
 10 -12 -3 0.98 0.62
 10 12 3 1.34 0.24
 -10 -12 3 1.12 0.28
 10 12 3 1.1 0.24
 10 -12 -3 1.83 0.79
 10 12 -3 1.32 0.29
 10 12 -3 1.15 0.25
 10 -12 3 0.02 0.73
 10 12 -3 1.32 0.37
 -10 -12 -3 1.36 0.29
 10 -12 3 1.98 0.64
 10 12 -3 1.19 0.26
 10 -12 3 1.17 0.32
 -10 -12 -3 1.23 0.3
 -10 12 3 1.19 0.39
 10 -13 -3 1.7 0.88
 -10 -13 3 0.22 0.25
 10 13 3 0.25 0.21
 10 13 3 0.03 0.18
 -10 -13 3 0.1 0.27
 10 13 3 0.27 0.41
 10 -13 -3 0.73 0.35
 10 -13 -3 -0.32 0.47
 10 13 3 0.31 0.21
 10 13 -3 0.31 0.19
 10 13 -3 -0.14 0.21
 10 13 -3 0.1 0.29
 10 -13 3 0.3 0.54
 -10 -13 -3 0.31 0.27
 -10 -13 -3 -0.04 0.24
 -10 13 3 0.14 0.32
 10 13 -3 -0.12 0.2
 10 -13 3 -0.81 0.66
 10 -13 3 -0.08 0.23
 10 14 3 14.21 0.95
 10 -14 -3 14.37 2.55
 10 14 3 14.59 1.1
 -10 -14 3 14.32 0.96
 -10 -14 3 15.24 1.05
 10 -14 -3 12.24 1.8
 10 14 3 13.98 1.31
 10 14 3 16.92 0.99
 10 14 -3 15.08 0.98
 -10 -14 -3 13.7 0.97
 10 14 -3 14.76 1.11
 -10 14 3 14.58 1.23
 10 -14 3 14.55 1.6
 10 14 -3 12.72 1.17
 -10 -14 -3 14.18 1.02
 10 14 -3 14.14 0.96
 10 15 3 0.46 0.22
 -10 -15 3 0.2 0.28
 10 15 3 0.28 0.41
 10 -15 -3 0.28 0.75
 10 15 3 -0.02 0.2
 -10 -15 3 0.01 0.24
 10 -15 -3 -0.45 0.52
 10 15 3 0.16 0.23
 -10 15 3 0.08 0.34
 10 15 -3 0.44 0.23
 10 -15 3 0.46 0.59
 10 15 -3 0.42 0.24
 -10 -15 -3 -0.24 0.27
 -10 -15 -3 0.41 0.28
 10 15 -3 -0.06 0.19
 10 15 -3 -0.08 0.27
 10 -15 3 -1.04 0.75
 10 16 3 5.89 0.61
 10 16 3 5.91 0.54
 10 -16 -3 3.97 1.16
 10 16 3 6.35 0.54
 -10 -16 3 5.17 0.6
 -10 -16 -3 5.89 0.61
 10 16 -3 5.74 0.6
 10 16 -3 6.86 0.54
 -10 -16 -3 6.62 1.59
 10 16 -3 6.47 0.53
 10 -17 -3 0.75 0.67
 -10 -17 3 1.12 0.33
 -10 -17 3 0.65 0.62
 10 17 3 1.58 0.26
 10 17 3 1.6 0.27
 10 17 3 1.11 0.29
 10 17 -3 1.54 0.31
 10 -17 3 -0.36 0.73
 10 17 -3 1.56 0.27
 -10 -17 -3 0.71 0.32
 10 17 -3 1.16 0.25
 10 18 3 8.15 0.74
 -10 -18 3 8.79 1.85
 10 -18 -3 8.8 1.87
 10 18 3 8.75 0.66
 10 18 3 8.82 0.65
 10 18 -3 8.9 0.64
 10 18 -3 8.13 0.65
 10 18 -3 8.98 0.75
 10 19 3 0.36 0.18
 10 19 3 -0.05 0.23
 10 19 3 0.09 0.18
 -10 -19 3 -0.26 0.48
 10 -19 -3 0.66 0.51
 10 -19 3 -0.73 0.5
 10 19 -3 -0.09 0.17
 10 19 -3 0.36 0.23
 10 19 -3 -0.07 0.16
 10 20 3 5.95 0.46
 -10 -20 3 7.12 1.52
 10 20 3 4.92 0.56
 10 20 3 5.91 0.47
 10 20 -3 5.02 0.46
 10 20 -3 5.87 0.55
 10 20 -3 5.8 0.45
 10 21 3 -0.05 0.14
 10 21 -3 0.18 0.13
 10 21 -3 0.03 0.14
 10 21 -3 0.25 0.2
 10 22 3 -0.09 0.12
 10 22 -3 -0.06 0.11
 11 -3 -3 13.57 1.06
 11 -3 3 10.86 0.83
 11 -4 -3 0.3 0.24
 11 4 3 0.35 0.2
 11 -4 3 -0.03 0.14
 11 -4 3 0.32 0.24
 11 5 3 13.41 1.16
 11 -5 -3 16.33 1.4
 11 5 3 15.71 1.14
 11 -5 -3 18.56 2.07
 11 -5 3 15.55 1.39
 11 -5 3 13.97 1.1
 11 -5 3 20.06 2.19
 11 6 3 95.47 7.37
 11 6 3 124.57 7.2
 11 -6 -3 121.66 8.43
 11 -6 -3 100.2 12.67
 11 -6 3 113.85 12.78
 11 -6 3 111.86 8.39
 11 -6 3 105.36 6.97
 11 -7 -3 15.07 1.97
 11 -7 -3 15.05 1.37
 11 7 3 12.47 1.05
 11 7 3 14.51 1.09
 11 -7 3 13.34 1.3
 11 7 -3 14.97 1.08
 11 -7 3 15.02 2.18
 11 -7 3 12.14 1.01
 11 -8 -3 23.3 2.82
 11 -8 -3 21.12 1.94
 11 8 3 20.65 1.56
 11 8 3 19.35 1.5
 11 8 -3 19.42 1.5
 11 -8 3 21.23 1.47
 11 -8 3 18.82 1.83
 11 -8 3 22.79 3.02
 11 -9 -3 24.69 2.14
 11 9 3 28.82 2.01
 11 9 3 24.72 1.9
 11 -9 -3 24.75 2.44
 11 -9 -3 28.4 3.54
 11 -9 3 27.44 1.85
 11 -9 3 25.29 2.32
 11 9 -3 27.17 1.91
 11 -9 3 25.28 2.19
 11 -9 3 30.75 3.85
 11 -10 -3 54.39 5.24
 -11 -10 3 69.77 3.76
 11 10 3 62.74 4.39
 11 -10 -3 63.45 7.74
 11 10 3 65.97 4.42
 11 -10 -3 61.7 4.66
 11 -10 3 60.94 4.74
 11 -10 3 68.62 4.2
 11 -10 3 59.11 5.13
 -11 -10 -3 67.28 3.72
 11 10 -3 63.43 4.31
 11 -10 3 68.7 8.12
 11 11 3 0.84 0.46
 11 -11 -3 1.68 0.4
 11 11 3 1.11 0.26
 11 -11 -3 1.42 0.69
 -11 -11 3 1.04 0.3
 11 11 3 0.81 0.34
 -11 -11 3 0.84 0.27
 11 -11 -3 0.5 0.82
 11 -11 -3 0.24 0.49
 11 11 3 0.88 0.23
 11 -11 3 -0.02 0.71
 11 -11 3 1.52 0.59
 11 11 -3 1.44 0.3
 -11 -11 -3 0.93 0.27
 11 11 -3 0.62 0.34
 -11 -11 -3 1.05 0.26
 11 -11 3 0.86 0.28
 11 11 -3 0.62 0.23
 11 -12 -3 2.48 1.01
 11 12 3 3.13 0.65
 11 12 3 3.16 0.38
 11 12 3 3.3 0.54
 11 -12 -3 3.25 0.53
 11 12 3 2.48 0.38
 -11 -12 3 3.94 0.46
 11 -12 -3 3.62 0.82
 -11 -12 3 2.41 0.35
 11 -12 -3 1.51 0.74
 11 12 3 2.56 0.38
 -11 12 3 3.25 0.57
 11 12 -3 2.35 0.37
 -11 -12 -3 2.69 0.35
 11 -12 3 0.4 0.89
 11 12 -3 2.72 0.45
 -11 -12 -3 3.53 0.46
 11 -12 3 3.18 0.78
 11 12 -3 2.63 0.38
 11 12 -3 3.78 0.55
 11 -12 3 3.89 0.51
 -11 -13 3 21.51 1.36
 11 13 3 22.22 1.36
 11 -13 -3 26.47 1.69
 11 13 3 20.95 1.53
 -11 -13 3 24.18 1.45
 11 -13 -3 16.69 2.35
 11 -13 -3 19.64 3.23
 11 13 3 21.22 1.79
 11 13 3 20.76 1.34
 11 -13 3 21.71 2.12
 11 13 -3 23.35 1.37
 11 -13 3 22.89 1.62
 11 13 -3 18.28 1.34
 -11 13 3 21.24 1.67
 11 13 -3 19.48 1.63
 -11 -13 -3 23.34 1.42
 -11 -13 -3 21.48 1.35
 11 13 -3 21.41 1.54
 11 14 3 36.96 3.05
 11 -14 -3 35.09 3.83
 11 -14 -3 37.56 5.46
 -11 -14 3 44.8 2.57
 11 14 3 40.25 2.49
 11 14 3 41.8 2.82
 11 14 3 45.87 2.5
 -11 -14 3 42.93 2.49
 11 -14 3 45.5 3.68
 11 14 -3 39.85 2.95
 -11 -14 -3 42.49 2.5
 11 14 -3 45.79 2.84
 -11 -14 -3 44.3 2.55
 11 14 -3 43.08 2.5
 11 14 -3 40.94 2.51
 11 15 3 0.35 0.25
 11 15 3 0.4 0.21
 11 -15 -3 -0.54 0.51
 11 15 3 -0.04 0.23
 -11 -15 3 0.43 0.3
 11 -15 -3 -0.76 0.79
 -11 -15 3 -0.23 0.25
 11 15 3 -0.2 0.43
 11 -15 3 -1.52 0.78
 11 15 -3 -0.31 0.22
 -11 -15 -3 -0.25 0.28
 11 15 -3 0.2 0.32
 -11 -15 -3 -0.32 0.27
 11 -15 3 0.67 0.63
 11 15 -3 0.21 0.21
 11 15 -3 0.08 0.23
 11 16 3 13.68 1
 11 -16 -3 11.08 2.32
 11 16 3 13.14 0.88
 -11 -16 3 11.8 0.94
 11 16 3 11 0.85
 -11 -16 -3 12.93 0.95
 11 16 -3 12.88 0.87
 11 16 -3 12.31 1
 11 16 -3 11.86 0.86
 11 17 3 8.02 0.62
 -11 -17 3 6.71 0.68
 11 -17 -3 5.97 1.87
 -11 -17 3 8.86 1.8
 11 17 3 8.2 0.62
 11 17 3 8.42 0.72
 -11 -17 -3 6.42 0.67
 11 17 -3 7.84 0.61
 11 17 -3 8.29 0.63
 11 17 -3 8.03 0.72
 11 18 3 24.82 1.53
 11 18 3 25.93 1.52
 11 18 3 25.91 1.75
 -11 -18 3 27.44 3.57
 11 -18 -3 23.82 3.48
 11 18 -3 27.51 1.76
 -11 -18 -3 19.41 1.54
 11 18 -3 25.65 1.52
 11 18 -3 25.23 1.53
 11 19 3 1.34 0.22
 -11 -19 3 0.68 0.57
 11 19 3 1.29 0.29
 11 19 -3 1.49 0.23
 11 19 -3 1.85 0.31
 11 19 -3 1.51 0.23
 11 -19 3 -0.16 0.58
 11 20 3 26.28 1.64
 11 20 3 21.43 1.42
 11 20 -3 22.43 1.42
 11 20 -3 24.87 1.63
 11 21 3 6.12 0.47
 11 21 -3 7.14 0.57
 11 21 -3 6.24 0.47
 12 0 3 0.03 0.18
 12 1 3 0.01 0.17
 12 -1 3 0.16 0.18
 12 2 3 2.18 0.3
 12 -2 -3 0.64 0.51
 12 -3 -3 0.03 0.21
 12 3 3 -0.03 0.18
 12 -3 -3 -0.05 0.31
 12 4 3 3.1 0.38
 12 -4 -3 3.04 0.46
 12 -4 3 2.7 0.47
 12 4 -3 2.33 0.36
 12 -5 -3 3.3 0.51
 12 5 3 2.15 0.36
 12 -5 3 1.95 0.31
 12 -5 3 3.03 0.5
 12 6 3 1.22 0.27
 12 6 3 0.86 0.26
 12 -6 -3 3.23 0.83
 12 -6 -3 0.51 0.34
 12 -6 3 0.8 0.37
 12 -6 3 0.87 0.34
 12 -6 3 0.53 0.2
 12 -7 -3 1.64 0.5
 12 7 3 2.01 0.38
 12 -7 -3 1.88 0.53
 12 7 3 2.89 0.42
 12 -7 3 1.57 0.58
 12 -7 3 2.55 0.52
 12 -7 3 1.84 0.32
 12 8 3 1.84 0.36
 12 -8 -3 1.88 0.37
 12 8 3 2.93 0.49
 12 -8 -3 2.25 0.59
 12 -8 -3 2.08 0.57
 12 -8 -3 2.62 0.67
 12 -8 3 1.89 0.66
 12 -8 3 2.78 0.61
 12 -8 3 2.35 0.39
 12 -8 3 2.87 0.59
 12 -9 -3 0.7 0.51
 12 -9 -3 2.02 0.58
 12 -9 -3 1.09 0.32
 12 9 3 0.9 0.33
 12 9 3 1.24 0.43
 12 -9 -3 0.98 0.64
 -12 -9 3 1.65 0.31
 12 9 -3 1.51 0.37
 12 -9 3 1.59 0.56
 -12 -9 -3 1.26 0.28
 12 -9 3 0.8 0.61
 12 -9 3 1.28 0.65
 12 -9 3 1.23 0.31
 12 -10 -3 0.54 0.69
 12 10 3 0.66 0.31
 12 -10 -3 0.12 0.46
 12 10 3 0.68 0.24
 12 10 3 0 0.37
 12 -10 -3 0.2 0.29
 12 -10 -3 -0.39 0.58
 -12 -10 3 0.19 0.25
 -12 -10 3 0.28 0.23
 12 10 -3 0.38 0.33
 -12 -10 -3 0 0.22
 12 -10 3 -0.06 0.64
 12 10 -3 0.33 0.22
 12 -10 3 0.02 0.57
 12 -10 3 -0.04 0.23
 -12 -10 -3 0.26 0.25
 12 -10 3 0.53 0.51
 12 10 -3 0.45 0.26
 -12 -11 3 9.16 0.71
 12 11 3 9.26 0.79
 12 -11 -3 6.32 1.39
 12 -11 -3 11.31 0.92
 -12 -11 3 10.25 0.78
 12 11 3 10.2 0.89
 12 11 3 8.46 1.03
 12 11 3 8.71 0.68
 12 -11 -3 6.57 1.97
 12 -11 -3 9.11 1.31
 12 11 -3 9.32 0.89
 -12 -11 -3 9.6 0.7
 12 11 -3 9.11 0.82
 12 11 -3 8.43 0.69
 12 -11 3 11.33 0.87
 12 -11 3 8.57 1.21
 -12 -11 -3 11.07 0.77
 12 -12 -3 -0.48 0.5
 -12 -12 3 0 0.27
 -12 -12 3 -0.07 0.26
 12 -12 -3 -0.21 0.72
 12 12 3 -0.22 0.21
 12 12 3 -0.09 0.41
 12 -12 -3 -0.17 0.32
 12 12 3 -0.02 0.23
 12 -12 -3 -1.33 0.74
 12 12 -3 0.17 0.25
 -12 -12 -3 -0.4 0.23
 -12 12 3 -0.03 0.35
 -12 -12 -3 0.01 0.25
 12 -12 3 -1.23 0.69
 12 12 -3 0.15 0.21
 12 -12 3 -0.21 0.57
 12 -12 3 -0.17 0.26
 12 12 -3 0.32 0.32
 12 13 3 1.8 0.3
 12 -13 -3 0.15 0.68
 12 -13 -3 0.64 0.94
 -12 -13 3 2.32 0.38
 12 13 3 1.23 0.32
 12 13 3 0.85 0.53
 -12 -13 3 2.1 0.33
 -12 -13 -3 2.13 0.37
 12 -13 3 1.68 0.74
 12 13 -3 2.29 0.37
 12 13 -3 2.47 0.48
 12 -13 3 0.18 0.92
 12 13 -3 1.7 0.29
 -12 -13 -3 2.2 0.32
 12 14 3 1.71 0.34
 12 14 3 1.19 0.27
 12 -14 -3 -0.2 0.68
 -12 -14 3 1.37 0.3
 12 14 3 1.22 0.53
 12 -14 -3 -0.39 0.88
 -12 -14 3 1.09 0.35
 12 14 -3 1.55 0.42
 12 14 -3 1.5 0.34
 -12 -14 -3 1.32 0.33
 12 14 -3 1.26 0.27
 12 -14 3 1.24 0.71
 12 -14 3 0.16 0.87
 -12 -14 -3 1.54 0.32
 -12 -15 3 4.66 0.55
 -12 -15 3 4.44 0.48
 12 -15 -3 1.9 0.96
 12 15 3 5.49 0.56
 12 15 3 4.47 0.47
 12 15 -3 4.05 0.45
 -12 -15 -3 4.1 0.49
 12 15 -3 5.77 0.57
 -12 -15 -3 3.7 0.53
 12 16 3 -0.06 0.21
 12 16 3 0.27 0.26
 -12 -16 3 -0.02 0.3
 12 -16 -3 -0.39 0.62
 12 16 -3 0.16 0.26
 12 -16 3 -1.73 0.78
 -12 -16 -3 0.08 0.28
 12 16 -3 0.17 0.22
 -12 -16 -3 -0.47 0.27
 -12 -17 3 3.1 0.47
 12 17 3 3.41 0.39
 12 -17 -3 1.64 0.83
 -12 -17 3 4.64 1.45
 12 17 3 3.2 0.47
 12 17 -3 3.28 0.48
 12 17 -3 3.22 0.38
 -12 -17 -3 3.67 0.48
 12 18 3 1.51 0.24
 12 18 3 1.45 0.31
 12 -18 -3 1.07 0.58
 -12 -18 3 1.06 0.61
 -12 -18 3 0.7 0.29
 12 18 -3 1.4 0.23
 12 -18 3 -0.55 0.66
 12 18 -3 1.92 0.31
 -12 -18 -3 0.39 0.29
 12 19 3 0.46 0.23
 12 19 3 0.37 0.18
 -12 -19 3 0.34 0.52
 12 -19 3 -0.14 0.5
 12 19 -3 0.48 0.18
 12 19 -3 0.25 0.22
 12 20 3 -0.01 0.21
 12 20 3 -0.02 0.15
 12 20 -3 0.22 0.2
 12 20 -3 0.08 0.14
 12 21 3 0.82 0.22
 12 21 3 0.53 0.14
 12 21 -3 0.43 0.14
 12 21 -3 0.44 0.2
 13 0 3 -0.34 0.19
 13 1 3 35.9 2.35
 13 1 -3 33.11 2.33
 13 -1 3 27.96 4.42
 13 -1 3 35.4 2.35
 13 2 3 12.37 0.89
 13 -2 3 12.56 0.9
 13 2 -3 9.99 0.86
 13 -2 3 10.13 1.91
 13 3 3 59.6 4.17
 13 -3 -3 64.42 7.34
 13 -3 3 67.74 7.26
 13 3 -3 55.68 4.16
 13 -4 -3 16.66 1.35
 13 -4 -3 17.09 2.35
 13 4 3 14.73 1.15
 13 4 -3 13.19 1.13
 13 -4 3 17.76 2.15
 13 -5 -3 77.86 9.18
 13 -5 -3 83.72 6.03
 13 5 3 72.54 5.28
 13 -5 3 76.65 6.02
 13 -5 3 80.93 9.17
 13 -6 -3 25.05 2
 13 -6 -3 29.51 2.16
 13 6 3 25.67 1.8
 13 -6 -3 24.91 3.23
 13 -6 3 22.02 1.99
 13 -6 3 22.94 2.11
 13 -6 3 25.69 3.3
 13 -7 -3 27.79 3.66
 13 -7 -3 29.02 2.25
 13 -7 -3 33 2.51
 13 7 3 28.43 2.04
 13 -7 3 29.18 3.8
 13 -7 3 27.51 2.42
 13 -7 3 26.38 2.29
 13 8 3 9.11 0.82
 13 -8 -3 6.23 1.54
 -13 -8 3 8.04 0.69
 13 -8 -3 7.86 1
 13 8 3 8.88 0.75
 13 -8 -3 8.49 1.07
 13 8 -3 6.28 1
 13 -8 3 7.29 1.9
 13 -8 3 7.51 0.7
 13 -8 3 7.88 1.09
 -13 -8 -3 8.87 0.67
 13 -8 3 7.6 0.97
 13 -9 -3 81.14 5.85
 13 9 3 83.41 5.53
 13 9 3 72.63 5.23
 -13 -9 3 79.78 4.69
 13 -9 -3 83.97 6.53
 -13 -9 3 84.65 4.72
 13 9 3 83.6 5.49
 13 -9 -3 79.64 9.63
 13 -9 3 78 6.41
 13 -9 3 88.92 9.94
 13 -9 3 83.75 5.26
 -13 -9 -3 84.63 4.69
 13 -9 3 81.04 5.89
 -13 -9 -3 76.58 4.68
 13 10 3 3.82 0.69
 13 10 3 3.29 0.48
 13 -10 -3 4.42 0.83
 13 -10 -3 2.98 0.94
 13 -10 -3 2.72 0.81
 -13 -10 3 3.52 0.49
 -13 -10 3 3.43 0.45
 13 10 3 3.72 0.55
 13 -10 3 1.81 0.96
 13 -10 3 4.65 0.84
 13 -10 3 4.54 0.86
 13 -10 3 4.17 0.51
 -13 -10 -3 4.11 0.49
 -13 -10 -3 4.45 0.43
 13 10 -3 3.57 0.5
 -13 -11 3 2.37 0.36
 13 11 3 2.95 0.68
 13 -11 -3 2.01 1
 13 11 3 3.13 0.47
 -13 -11 3 2.98 0.46
 13 11 3 3.1 0.56
 13 -11 -3 2.96 0.8
 13 -11 -3 1.24 0.71
 -13 -11 -3 3.17 0.47
 13 -11 3 3.07 0.82
 -13 -11 -3 3.19 0.41
 13 -11 3 1.6 0.39
 13 -11 3 0.52 0.93
 13 11 -3 2.7 0.48
 13 -12 -3 0.39 0.93
 13 -12 -3 -0.97 0.48
 13 12 3 0.24 0.51
 -13 -12 3 -0.2 0.26
 -13 -12 3 0.08 0.27
 13 12 3 0.09 0.25
 13 -12 -3 0.34 0.75
 13 -12 3 0.31 0.6
 -13 -12 -3 0.26 0.26
 -13 -12 -3 0.37 0.27
 13 12 -3 0.41 0.28
 13 12 -3 -0.23 0.23
 13 -12 3 -1.03 0.82
 13 13 3 43.03 2.64
 -13 -13 3 48.1 2.68
 13 13 3 38.02 3.28
 13 13 3 44.04 3.01
 -13 -13 3 48.61 2.75
 -13 -13 -3 46.63 2.67
 13 13 -3 43.13 3.01
 13 -13 3 45 3.91
 -13 -13 -3 49.66 2.73
 13 13 -3 41.91 2.65
 13 14 3 2.88 0.47
 13 -14 -3 0.71 1.03
 13 -14 -3 0.2 0.77
 -13 -14 3 2.06 0.35
 -13 -14 3 2.09 0.42
 13 14 3 2.27 0.65
 13 14 3 2.25 0.34
 -13 -14 -3 2.83 0.4
 13 14 -3 3.15 0.48
 13 14 -3 2.91 0.4
 13 -14 3 3.22 0.88
 -13 -14 -3 2.32 0.36
 13 -15 -3 0.22 0.8
 13 15 3 1.65 0.29
 -13 -15 3 1.76 0.39
 -13 -15 3 1.95 0.34
 13 15 3 2.51 0.4
 -13 -15 -3 1.94 0.38
 13 15 -3 1.6 0.29
 13 15 -3 2.71 0.42
 -13 -15 -3 2.13 0.35
 13 -15 3 -0.85 0.87
 -13 -16 3 4.27 0.54
 13 -16 -3 1.99 0.95
 13 16 3 5.03 0.56
 13 16 3 4.77 0.45
 13 16 -3 4.01 0.45
 -13 -16 -3 4.18 0.53
 -13 -16 -3 4.01 0.5
 13 16 -3 4.73 0.55
 13 -17 -3 43.67 5.84
 -13 -17 3 45.56 2.78
 13 17 3 44.8 2.72
 13 17 3 50.63 3.11
 -13 -17 -3 44.33 2.77
 13 17 -3 46.67 2.72
 13 17 -3 49.76 3.09
 -13 -18 3 1.43 0.31
 -13 -18 3 0.87 0.6
 13 18 3 1.38 0.3
 13 18 3 0.72 0.21
 13 18 -3 1.59 0.31
 13 18 -3 1.36 0.23
 13 -18 3 -0.46 0.67
 -13 -18 -3 0.88 0.3
 13 19 3 0.59 0.24
 13 19 3 0.23 0.17
 13 19 -3 0.6 0.23
 13 19 -3 0.64 0.18
 13 20 3 5.42 0.5
 13 20 3 3.87 0.36
 13 20 -3 3.98 0.36
 13 20 -3 4.96 0.47
 14 0 -3 0.09 0.18
 14 0 3 -0.03 0.19
 14 1 3 4.26 0.46
 14 -1 3 4.15 0.46
 14 1 -3 3.59 0.42
 14 2 3 0.43 0.22
 14 2 -3 0.13 0.19
 14 -2 3 0.3 0.19
 14 -2 3 -0.53 0.53
 14 3 3 1.88 0.33
 14 -3 -3 1.25 0.71
 14 -3 3 1.32 0.26
 14 -3 3 0.81 0.52
 14 3 -3 1.32 0.26
 14 4 3 2.86 0.38
 14 -4 -3 1.37 0.67
 14 -4 -3 2.28 0.47
 14 -4 3 1.53 0.57
 14 4 -3 2.61 0.37
 14 -5 -3 1.66 0.41
 14 -5 -3 1 0.57
 14 -5 -3 1.92 0.45
 14 5 3 1.36 0.3
 14 5 -3 1.17 0.45
 14 -5 3 1.16 0.5
 14 -5 3 1.45 0.52
 14 6 3 4.91 0.49
 14 -6 -3 3.27 0.61
 14 -6 -3 2.69 0.77
 14 -6 -3 4.07 0.64
 14 -6 3 3.94 0.64
 14 -6 3 2.21 0.72
 14 6 -3 3.65 0.6
 14 -7 -3 2.38 0.56
 14 7 3 1.36 0.32
 14 -7 -3 1.59 0.53
 14 -7 -3 1.28 0.54
 -14 -7 3 1.26 0.3
 14 -7 3 0.25 0.48
 14 -7 3 1.71 0.51
 -14 -7 -3 1.02 0.29
 14 7 -3 1.48 0.54
 14 -7 3 1.51 0.58
 14 -8 -3 -0.08 0.44
 -14 -8 3 0.26 0.27
 -14 -8 3 0.16 0.25
 14 8 3 0.59 0.25
 14 -8 -3 1.57 0.56
 14 8 3 0.67 0.3
 14 -8 -3 0.82 0.55
 -14 -8 -3 0.59 0.27
 14 -8 3 0.8 0.59
 14 -8 3 -0.55 0.48
 -14 -8 -3 0.47 0.24
 14 8 -3 0.76 0.33
 14 -8 3 1.01 0.51
 14 -9 -3 0.71 0.56
 14 -9 -3 -0.32 0.57
 -14 -9 3 0.3 0.24
 14 9 3 0.19 0.3
 -14 -9 3 0.34 0.28
 14 9 3 0.38 0.24
 14 9 -3 0.05 0.3
 -14 -9 -3 0.19 0.26
 -14 -9 -3 0.14 0.24
 14 -9 3 -0.62 0.61
 14 -9 3 0 0.48
 14 -10 -3 4.04 1.01
 -14 -10 3 3.32 0.5
 14 -10 -3 3.64 0.84
 -14 -10 3 3.87 0.48
 14 10 3 4.43 0.58
 14 10 3 3.39 0.5
 14 10 -3 3.44 0.57
 -14 -10 -3 3.06 0.43
 -14 -10 -3 4.27 0.5
 14 -10 3 3.55 0.83
 14 -10 3 3.59 0.92
 14 -11 -3 1.18 0.73
 14 11 3 1 0.31
 14 11 3 0.38 0.54
 14 -11 -3 -1.07 0.52
 -14 -11 3 0.45 0.27
 14 11 3 0.69 0.34
 14 -11 -3 0.17 0.86
 -14 -11 3 0.84 0.3
 14 11 -3 0.51 0.31
 14 -11 3 -1.76 0.72
 -14 -11 -3 0.54 0.26
 -14 -11 -3 1.02 0.31
 14 -11 3 0.24 0.62
 14 -12 -3 0.83 0.77
 14 -12 -3 -0.44 0.88
 -14 -12 3 0.56 0.28
 -14 -12 3 0.16 0.27
 14 12 3 0.7 0.31
 14 -12 -3 -1.3 0.55
 14 12 3 0.32 0.61
 -14 -12 -3 0.44 0.27
 14 -12 3 1.07 0.71
 -14 -12 -3 0.35 0.26
 14 12 -3 0.12 0.3
 -14 -13 3 0.32 0.28
 14 13 3 0.13 0.28
 -14 -13 3 0.44 0.31
 14 -13 -3 -0.97 0.91
 14 13 3 0.01 0.53
 14 13 -3 0.43 0.31
 -14 -13 -3 0.25 0.28
 14 -13 3 0.15 0.7
 -14 -13 -3 0.42 0.29
 -14 -14 3 2.4 0.37
 14 14 3 3.26 0.5
 -14 -14 3 2.67 0.43
 14 14 -3 2.17 0.35
 -14 -14 -3 3.37 0.51
 14 14 -3 2.61 0.44
 -14 -14 -3 2.54 0.37
 -14 -15 3 -0.03 0.3
 14 15 3 0.17 0.28
 -14 -15 3 0.41 0.28
 14 15 -3 0.25 0.24
 -14 -15 -3 0.39 0.31
 -14 -15 -3 0.27 0.28
 14 15 -3 0.3 0.29
 14 16 3 1.68 0.36
 -14 -16 3 1.04 0.28
 14 -16 -3 -0.29 0.64
 -14 -16 3 0.63 0.31
 14 -16 3 -1.2 0.93
 -14 -16 -3 0.85 0.3
 -14 -16 -3 1.2 0.31
 14 16 -3 1.01 0.24
 14 16 -3 1.69 0.33
 14 17 3 0.6 0.28
 -14 -17 3 0.54 0.28
 14 -17 -3 0.87 0.59
 14 17 -3 0.49 0.21
 14 -17 3 -0.64 0.7
 -14 -17 -3 0.49 0.28
 14 17 -3 0.75 0.27
 14 18 3 -0.37 0.23
 -14 -18 3 -0.09 0.5
 -14 -18 3 -0.16 0.24
 14 18 -3 0.09 0.21
 14 18 -3 -0.07 0.17
 -14 -18 -3 -0.49 0.23
 14 -18 3 -0.48 0.54
 14 19 3 0.11 0.2
 14 19 -3 0.17 0.2
 14 20 3 0.1 0.2
 14 20 -3 0.17 0.18
 15 0 -3 0.26 0.37
 15 0 3 -0.3 0.2
 15 0 -3 -0.38 0.19
 15 1 3 33.23 2.3
 15 -1 -3 34.69 2.48
 15 1 -3 28.18 2.27
 15 1 -3 35.37 2.49
 15 -1 3 33.6 2.3
 15 2 3 8.99 0.73
 15 -2 -3 9.11 0.94
 15 2 -3 6.3 0.67
 15 -2 3 9.27 0.97
 15 2 -3 10.08 0.94
 15 -2 3 8.09 0.74
 15 -3 -3 49.35 3.42
 15 3 3 45.19 3.2
 15 3 -3 41.11 3.18
 15 3 -3 47.01 3.4
 15 -3 3 52.51 5.97
 15 -3 3 48.68 3.42
 15 -3 3 45.77 3.22
 15 -4 -3 0.21 0.4
 15 4 3 0.08 0.23
 15 -4 -3 0.48 0.77
 15 -4 3 0.23 0.57
 15 4 -3 0.72 0.43
 15 4 -3 -0.38 0.21
 15 -4 3 0.33 0.22
 15 -4 3 -0.19 0.42
 15 -5 -3 49.72 3.78
 15 -5 -3 55.04 6.56
 15 5 3 51.26 3.56
 15 -5 3 49.88 3.79
 15 -5 3 51.59 6.4
 15 5 -3 53.19 3.78
 15 -6 -3 2.94 0.58
 15 -6 -3 2.45 0.83
 15 6 3 3.18 0.44
 -15 -6 3 2.37 0.38
 15 6 -3 4.29 0.8
 15 -6 3 2.26 0.81
 -15 -6 -3 3.23 0.45
 15 -6 3 3.44 0.63
 15 7 3 29.83 2.22
 15 -7 -3 34.77 2.6
 15 7 3 32.39 2.33
 -15 -7 3 34.1 2.03
 15 -7 -3 34.34 4.52
 15 -7 -3 35.99 2.81
 15 7 -3 28.49 2.23
 15 -7 3 30.22 4.43
 -15 -7 -3 34.62 2.02
 15 -7 3 33.87 2.63
 15 7 -3 34.51 2.57
 15 8 3 2.85 0.48
 15 8 3 0.93 0.32
 15 -8 -3 2.19 0.67
 -15 -8 3 1.63 0.32
 15 -8 -3 0.9 0.78
 -15 -8 3 1.21 0.33
 15 -8 -3 2.46 0.64
 15 -8 3 1.54 0.68
 15 8 -3 2.26 0.39
 15 -8 3 3.1 0.67
 -15 -8 -3 1.6 0.35
 15 -8 3 0.72 0.74
 -15 -8 -3 1.19 0.29
 15 -9 -3 65.05 5.18
 15 9 3 61.75 4.12
 -15 -9 3 66.13 3.72
 -15 -9 3 62.59 3.68
 15 9 3 66.13 4.34
 15 -9 -3 67.16 4.68
 15 -9 -3 56.55 7.76
 15 -9 3 61.62 7.91
 -15 -9 -3 66.51 3.7
 15 -9 3 62.54 5.11
 15 9 -3 53.39 4.11
 -15 -9 -3 62.84 3.67
 15 -9 3 67.24 4.75
 15 -10 -3 6.09 0.96
 15 10 3 5.74 0.67
 15 -10 -3 5.82 1.22
 -15 -10 3 5.49 0.56
 15 10 3 4.79 0.63
 -15 -10 3 5.25 0.6
 15 10 -3 4.66 0.67
 -15 -10 -3 5.62 0.54
 15 -10 3 5.27 1.02
 -15 -10 -3 6.17 0.6
 15 -10 3 5.55 1.05
 15 -11 -3 9.62 1.77
 15 11 3 12.59 1.13
 15 -11 -3 16.39 1.7
 -15 -11 3 15.79 1
 -15 -11 3 15.2 1.07
 15 11 3 14.11 1.19
 15 11 -3 13.06 1.16
 15 -11 3 14.11 1.68
 -15 -11 -3 15.31 1.06
 -15 -11 -3 15.01 0.99
 -15 -12 3 1.33 0.33
 -15 -12 3 1.46 0.37
 15 -12 -3 3.21 0.91
 15 -12 -3 1.76 1.05
 15 12 3 2.75 0.44
 15 12 -3 2.18 0.44
 15 -12 3 1.94 0.86
 -15 -12 -3 2.39 0.39
 -15 -12 -3 2.23 0.35
 15 13 3 62.51 4.11
 -15 -13 3 63.14 3.65
 -15 -13 3 57.21 3.68
 -15 -13 -3 66.02 3.69
 15 13 -3 60.01 4.11
 -15 -13 -3 63.86 3.65
 15 -14 -3 -1.51 0.92
 -15 -14 3 1.55 0.33
 15 14 3 2.68 0.43
 -15 -14 3 1.04 0.38
 -15 -14 -3 1.85 0.34
 -15 -14 -3 1.16 0.35
 15 14 -3 2.24 0.4
 15 15 3 2.52 0.4
 -15 -15 3 1.33 0.36
 -15 -15 3 1.71 0.31
 -15 -15 -3 1.24 0.33
 15 15 -3 2.34 0.4
 -15 -15 -3 1.78 0.37
 15 -16 -3 -0.28 0.72
 -15 -16 3 0.3 0.29
 -15 -16 3 0.12 0.25
 15 16 3 0.83 0.31
 -15 -16 -3 0.2 0.27
 -15 -16 -3 0.53 0.28
 15 16 -3 0.97 0.3
 15 17 3 50.77 3.04
 15 -17 -3 44.15 5.91
 -15 -17 3 42.02 2.7
 -15 -17 -3 42.07 2.7
 15 17 -3 48.69 3.03
 15 18 3 1.81 0.32
 -15 -18 3 0.88 0.26
 15 18 -3 1.53 0.28
 -15 -18 -3 0.52 0.25
 15 19 3 0.1 0.2
 15 19 -3 0.35 0.21
 -15 -19 -3 -0.18 0.21
 16 0 -3 0.03 0.21
 16 0 3 0.36 0.23
 16 0 -3 0.14 0.39
 16 1 3 -0.07 0.23
 16 -1 -3 -0.03 0.37
 16 -1 -3 0.16 0.21
 16 1 -3 0.43 0.4
 16 1 -3 0.02 0.2
 16 -1 3 0 0.41
 16 -1 3 0.1 0.22
 16 2 3 -0.05 0.22
 16 -2 -3 0.48 0.4
 16 -2 3 0.12 0.23
 16 -2 3 -0.01 0.42
 16 2 -3 0.01 0.22
 16 2 -3 0.57 0.41
 16 -3 -3 1.27 0.46
 16 3 3 0.67 0.26
 16 3 -3 0.93 0.44
 16 -3 3 0.82 0.26
 16 3 -3 0.85 0.25
 16 -3 3 0.78 0.5
 16 -4 -3 0.05 0.43
 16 4 3 0.26 0.24
 16 -4 3 0.36 0.49
 16 -4 3 0.09 0.22
 16 4 -3 -0.08 0.41
 16 4 -3 0.16 0.23
 16 -4 3 0.72 0.83
 16 -5 -3 2.92 0.56
 16 5 3 2.44 0.38
 16 5 3 1.97 0.37
 16 -5 3 1.67 0.57
 16 5 -3 2.88 0.6
 16 -5 3 2.54 0.46
 16 -5 3 2.02 0.92
 16 6 3 0 0.26
 16 6 3 -0.06 0.25
 16 -6 -3 0.31 0.47
 -16 -6 3 0.14 0.26
 16 -6 -3 0.66 0.99
 16 -6 3 -0.43 0.78
 16 6 -3 -0.05 0.49
 16 -6 3 -0.54 0.51
 16 7 3 -0.09 0.26
 -16 -7 3 0.1 0.26
 16 -7 -3 0.27 0.96
 16 7 3 0.1 0.28
 -16 -7 3 0 0.24
 16 -7 -3 0.42 0.52
 16 -7 3 -0.23 0.84
 -16 -7 -3 0.16 0.26
 16 -7 3 -0.26 0.57
 16 7 -3 -0.24 0.52
 -16 -8 3 1.24 0.3
 16 -8 -3 0.51 0.96
 16 8 3 1.84 0.36
 16 -8 -3 1.45 0.63
 -16 -8 3 1.6 0.35
 16 8 3 1.32 0.36
 16 -8 -3 1.41 0.65
 16 -8 3 0.75 0.68
 16 -8 3 -0.5 0.93
 -16 -8 -3 1.16 0.29
 16 8 -3 1.03 0.37
 -16 -8 -3 2.15 0.34
 16 -9 -3 -0.02 0.98
 16 -9 -3 -0.55 0.62
 -16 -9 3 0.18 0.26
 16 9 3 0.03 0.3
 16 9 3 0.33 0.29
 16 -9 -3 -0.17 0.6
 -16 -9 3 0.38 0.28
 -16 -9 -3 -0.07 0.25
 -16 -9 -3 -0.04 0.26
 16 9 -3 -0.12 0.32
 16 -9 3 0.21 0.7
 16 10 3 2.57 0.45
 -16 -10 3 3.29 0.47
 16 -10 -3 0.83 1.16
 -16 -10 3 3.57 0.5
 16 -10 -3 2.37 0.98
 16 10 3 2.5 0.43
 16 -10 -3 2.81 0.78
 -16 -10 -3 2.22 0.34
 16 -10 3 3.81 0.97
 -16 -10 -3 3.35 0.49
 16 10 -3 2.09 0.44
 16 11 3 0.55 0.3
 16 -11 -3 -0.1 0.69
 16 -11 -3 -0.16 0.89
 -16 -11 3 0.05 0.27
 -16 -11 3 -0.04 0.26
 -16 -11 -3 0.13 0.26
 16 -11 3 0.27 0.77
 16 11 -3 0.22 0.32
 -16 -11 -3 0.53 0.28
 -16 -12 3 8.23 0.66
 -16 -12 3 7.09 0.71
 16 12 3 7.08 0.77
 16 -12 -3 5.9 1.16
 -16 -12 -3 6.26 0.69
 -16 -12 -3 8.61 0.66
 16 12 -3 6.51 0.76
 16 13 3 0.58 0.32
 -16 -13 3 0.07 0.27
 -16 -13 3 0.7 0.34
 -16 -13 -3 0.35 0.28
 16 13 -3 0.82 0.36
 -16 -13 -3 0.49 0.29
 -16 -14 3 1.38 0.31
 -16 -14 3 1.53 0.36
 16 14 3 2 0.4
 -16 -14 -3 1.55 0.33
 -16 -14 -3 1.4 0.34
 16 14 -3 1.27 0.38
 -16 -15 3 0.02 0.23
 16 15 3 -0.09 0.27
 -16 -15 3 0.38 0.27
 16 -15 -3 -1.08 1.11
 -16 -15 -3 -0.05 0.27
 -16 -15 -3 0.24 0.28
 16 15 -3 0.01 0.27
 16 16 3 -0.15 0.26
 16 -16 -3 -2.04 0.95
 -16 -16 3 -0.27 0.23
 -16 -16 3 0.24 0.25
 -16 -16 -3 -0.32 0.25
 -16 -16 -3 0.04 0.24
 16 16 -3 -0.45 0.22
 -16 -17 3 -0.18 0.22
 16 17 3 0.09 0.27
 16 17 -3 0.44 0.25
 -16 -17 -3 -0.16 0.22
 16 18 3 0.12 0.2
 -16 -18 3 -0.17 0.2
 -16 -18 -3 -0.43 0.2
 16 18 -3 0.07 0.2
 16 19 3 -0.03 0.18
 16 19 -3 0.03 0.17
 17 0 -3 0.37 0.24
 17 0 3 -0.2 0.23
 17 0 -3 -0.24 0.39
 17 -1 -3 13.83 1.2
 17 1 3 15.51 1.22
 17 -1 -3 16.88 1.45
 17 1 -3 17.4 1.44
 17 -1 3 17.24 1.43
 17 -1 3 16.55 1.23
 17 1 -3 14.3 1.19
 17 -2 -3 33.05 2.29
 17 2 3 28.35 2.03
 17 -2 -3 26.11 2.04
 17 2 -3 24.13 2
 17 -2 3 28.81 2.24
 17 -2 3 30.32 2.05
 17 2 -3 31.12 2.26
 17 -3 -3 14.99 1.35
 17 3 3 14.7 1.1
 17 3 -3 11.65 1.07
 17 3 -3 15.07 1.36
 17 -3 3 12.9 1.34
 17 -3 3 14.41 1.12
 17 4 3 1.34 0.31
 17 -4 -3 1.12 0.5
 17 -4 3 0.77 0.32
 17 4 -3 0.59 0.28
 17 4 -3 2.1 0.55
 17 -4 3 1.91 0.58
 17 -5 -3 38.31 2.99
 17 5 3 37.61 2.73
 17 -5 3 39.7 2.77
 17 -5 3 39.53 3.02
 17 5 -3 39.81 2.99
 17 6 3 52.19 3.77
 17 -6 -3 58.9 4.26
 17 6 3 56.88 3.97
 -17 -6 3 54.79 3.39
 17 -6 3 57.42 4.3
 17 -6 3 58.9 4.01
 17 -6 3 71.61 7.82
 17 6 -3 57.21 4.23
 -17 -7 3 6.7 0.66
 17 7 3 5 0.69
 -17 -7 3 5.24 0.58
 17 -7 -3 7.03 1.09
 17 7 3 8.15 0.7
 17 -7 3 7.64 0.75
 17 -7 3 4.79 1.6
 -17 -7 -3 6.44 0.64
 17 -7 3 7.3 1.17
 17 8 3 6.73 0.71
 17 -8 -3 16.43 4.27
 17 -8 -3 7.46 1.16
 -17 -8 3 6.75 0.6
 -17 -8 3 6.66 0.67
 17 8 3 6.44 0.72
 -17 -8 -3 7.06 0.66
 17 -8 3 5.78 1.74
 17 8 -3 5.28 0.77
 17 -8 3 7.55 1.27
 -17 -8 -3 6.45 0.6
 17 9 3 29.17 2.11
 -17 -9 3 28.86 1.79
 17 -9 -3 30.64 2.51
 17 9 3 28.3 2.05
 -17 -9 3 30.32 1.86
 17 -9 -3 33.87 5.33
 -17 -9 -3 30.75 1.85
 -17 -9 -3 29.25 1.78
 17 -9 3 23.97 5.6
 17 9 -3 23.89 2.05
 17 -9 3 30.9 2.58
 -17 -10 3 54.74 3.31
 17 -10 -3 59.85 7.76
 -17 -10 3 55.66 3.28
 17 10 3 55.72 3.86
 17 10 3 54.7 3.69
 17 -10 -3 57.61 4.25
 17 -10 3 46.61 8.23
 -17 -10 -3 58.83 3.28
 17 -10 3 55.73 4.33
 -17 -10 -3 59.33 3.31
 17 10 -3 48.42 3.7
 -17 -11 3 2.33 0.42
 -17 -11 3 3.09 0.48
 17 -11 -3 3.68 0.92
 17 -11 -3 3.09 1.72
 17 11 3 3.72 0.6
 17 11 -3 2.72 0.51
 -17 -11 -3 3.92 0.47
 -17 -11 -3 2.4 0.42
 17 -11 3 -2.34 1.77
 17 -12 -3 8.12 1.44
 -17 -12 3 8.86 0.71
 -17 -12 3 9.38 0.77
 17 -12 -3 4.33 2.18
 17 12 3 8.21 0.84
 17 12 -3 8 0.86
 -17 -12 -3 6.83 0.73
 -17 -12 -3 9.55 0.71
 -17 -13 3 16.07 1.24
 -17 -13 3 19.18 1.2
 17 13 3 17.96 1.38
 -17 -13 -3 17.41 1.25
 17 13 -3 17.54 1.41
 -17 -13 -3 19.82 1.2
 -17 -14 3 16.88 1.23
 -17 -14 3 18.26 1.16
 17 14 3 19 1.36
 17 -14 -3 11.07 3.01
 17 14 -3 18.44 1.36
 -17 -14 -3 18.42 1.17
 -17 -14 -3 16.92 1.21
 -17 -15 3 0.16 0.27
 -17 -15 3 -0.47 0.22
 17 15 3 0.14 0.29
 17 -15 -3 -0.73 1.31
 17 15 -3 -0.09 0.26
 -17 -15 -3 -0.26 0.27
 -17 -15 -3 0.07 0.26
 -17 -16 3 9 0.64
 -17 -16 3 7.75 0.69
 17 16 3 10.61 0.8
 -17 -16 -3 7.05 0.68
 -17 -16 -3 8.21 0.66
 17 16 -3 8.49 0.76
 17 17 3 9.88 0.76
 -17 -17 3 7.6 0.66
 -17 -17 -3 7.07 0.65
 17 17 -3 9.58 0.75
 17 18 3 12.98 0.99
 17 18 -3 13.71 0.98
 18 0 -3 0.03 0.24
 18 0 -3 -0.27 0.42
 18 0 3 0.2 0.25
 18 -1 -3 0.07 0.24
 18 1 3 0.32 0.25
 18 -1 -3 0.51 0.48
 18 -1 3 0.12 0.26
 18 1 -3 0.67 0.49
 18 -1 3 0.63 0.49
 18 1 -3 0.05 0.24
 18 -2 -3 2.68 0.48
 18 2 3 2.44 0.46
 18 -2 -3 3.69 0.62
 18 2 -3 3.2 0.59
 18 -2 3 3.47 0.5
 18 2 -3 2.83 0.46
 18 -2 3 3.18 0.66
 18 3 3 -0.06 0.26
 18 -3 -3 0.14 0.45
 18 -3 -3 -0.13 0.27
 18 -3 3 0.54 0.52
 18 3 -3 -0.28 0.48
 18 3 -3 0.36 0.25
 18 -3 3 0.19 0.27
 18 4 3 1.38 0.33
 18 -4 -3 1.25 0.36
 18 -4 -3 0.94 0.54
 18 -4 3 1.39 0.35
 18 -4 3 1.43 0.58
 18 4 -3 2.38 0.6
 18 5 3 0.28 0.27
 18 -5 -3 -0.44 0.47
 18 -5 3 0.73 0.57
 18 -5 3 0.07 0.29
 18 5 -3 -0.82 0.47
 -18 -7 3 0.38 0.27
 18 7 3 0.22 0.28
 -18 -7 3 0.08 0.26
 18 -7 -3 0.18 0.54
 18 7 3 0.42 0.33
 18 -7 3 -0.46 0.61
 18 -7 3 0.13 0.3
 -18 -7 -3 0.1 0.26
 -18 -8 3 1.92 0.37
 18 8 3 1.38 0.37
 18 -8 -3 2.28 0.69
 18 8 3 2.07 0.42
 -18 -8 3 0.87 0.3
 18 -8 3 4.08 1.93
 18 -8 3 1.78 0.41
 18 -8 3 2.32 0.8
 -18 -8 -3 1.4 0.31
 -18 -8 -3 1.54 0.35
 -18 -9 3 3.73 0.51
 18 9 3 3.86 0.6
 18 -9 -3 4.34 0.88
 -18 -9 3 4.18 0.55
 18 9 3 4.22 0.64
 -18 -9 -3 3.47 0.49
 18 9 -3 3.46 0.59
 18 -9 3 4.51 0.95
 18 -9 3 6.14 2.27
 -18 -9 -3 3.93 0.54
 18 -9 3 5.83 0.67
 -18 -10 3 1.15 0.33
 18 10 3 1.63 0.42
 18 -10 -3 1.55 0.74
 -18 -10 3 1.24 0.32
 18 10 -3 1.28 0.45
 18 -10 3 1.86 0.41
 -18 -10 -3 2.03 0.38
 18 -10 3 3.45 2.26
 -18 -10 -3 1.79 0.33
 -18 -11 3 1.41 0.35
 18 -11 -3 1.04 0.8
 -18 -11 3 1.19 0.31
 18 11 3 1.53 0.41
 -18 -11 -3 0.89 0.31
 -18 -11 -3 0.98 0.29
 18 -11 3 1.58 0.38
 18 11 -3 1.19 0.46
 18 -11 3 -2.08 2.47
 18 -12 -3 3.4 1.93
 -18 -12 3 0.39 0.26
 -18 -12 3 0.24 0.29
 18 12 3 0.41 0.33
 18 -12 -3 0.14 0.69
 -18 -12 -3 0.42 0.27
 18 -12 3 -3.44 2.75
 18 -12 3 0.61 0.32
 18 12 -3 0.35 0.36
 -18 -12 -3 0.33 0.28
 18 -13 -3 1.92 1.87
 18 13 3 -0.07 0.31
 -18 -13 3 0.23 0.25
 -18 -13 3 -0.13 0.25
 18 13 -3 0.05 0.33
 18 -13 3 -0.03 0.29
 -18 -13 -3 -0.14 0.26
 18 -13 3 -2.43 2.03
 -18 -13 -3 -0.03 0.26
 -18 -14 3 0.52 0.27
 -18 -14 3 0.94 0.3
 18 -14 -3 1.21 1.77
 18 14 3 1.38 0.37
 -18 -14 -3 1.06 0.29
 -18 -14 -3 0.68 0.28
 18 14 -3 1.26 0.37
 18 -14 3 -1.58 1.89
 18 15 3 -0.2 0.27
 -18 -15 3 0.03 0.22
 -18 -15 3 -0.15 0.23
 18 -15 3 -0.84 1.67
 -18 -15 -3 0.02 0.24
 -18 -15 -3 -0.19 0.25
 18 15 -3 -0.2 0.27
 -18 -16 3 0.24 0.22
 -18 -16 3 -0.47 0.2
 18 16 3 0.12 0.24
 -18 -16 -3 -0.02 0.21
 -18 -16 -3 -0.06 0.22
 18 16 -3 -0.02 0.23
 -18 -17 3 0.54 0.21
 18 17 3 0.38 0.23
 -18 -17 -3 0.04 0.2
 18 17 -3 0.24 0.2
 19 0 -3 0.5 0.27
 19 0 3 -0.05 0.26
 19 0 -3 0.21 0.5
 19 -1 -3 -0.28 0.24
 19 1 3 0.64 0.29
 19 -1 -3 1.24 0.52
 19 1 -3 0.79 0.51
 19 1 -3 0.51 0.28
 19 -1 3 0.47 0.29
 19 -2 -3 46.14 3.27
 19 -2 -3 40.35 3.01
 19 2 3 42.8 3
 19 2 -3 38.05 2.96
 19 -2 3 43.4 3.25
 19 -2 3 45.14 3.03
 19 2 -3 45.94 3.27
 19 -3 -3 1.99 0.39
 19 3 3 1.46 0.34
 19 -3 -3 3.26 0.62
 19 3 -3 2.61 0.6
 19 3 -3 0.65 0.3
 19 -3 3 2.19 0.62
 19 -3 3 3.03 0.52
 19 -4 -3 0.27 0.48
 19 4 3 0.14 0.27
 19 -4 -3 0.03 0.3
 19 -4 3 -0.38 0.55
 19 -4 3 0.17 0.29
 19 4 -3 0.51 0.51
 19 -5 -3 2.14 0.45
 19 5 3 1.45 0.35
 19 -5 -3 1.54 0.59
 19 -5 3 2.22 0.7
 19 -5 3 1.88 0.42
 19 5 -3 1.52 0.61
 19 -6 -3 60.44 4.49
 19 6 3 57.29 4.16
 19 -6 3 57.35 4.5
 19 -6 3 66.61 4.24
 -19 -7 3 0.48 0.27
 19 7 3 0.2 0.3
 19 7 3 0.27 0.35
 -19 -7 3 -0.01 0.26
 19 -7 -3 1.06 0.6
 -19 -7 -3 0.45 0.27
 19 -7 3 0.36 0.69
 19 -7 3 0.08 0.34
 19 8 3 2.54 0.52
 19 -8 -3 3.13 0.79
 19 8 3 4.88 0.6
 -19 -8 3 3.82 0.53
 -19 -8 3 4.36 0.5
 -19 -8 -3 3.67 0.49
 19 -8 3 3.5 0.93
 19 -8 3 3.99 0.68
 -19 -8 -3 3.5 0.53
 -19 -9 3 -0.17 0.27
 19 9 3 0.11 0.31
 19 9 3 -0.26 0.34
 -19 -9 3 -0.09 0.26
 19 -9 -3 0.47 0.65
 -19 -9 -3 0.76 0.27
 19 -9 3 0.62 0.72
 -19 -9 -3 0.61 0.29
 19 -9 3 0.75 0.36
 -19 -10 3 61.97 3.66
 19 10 3 62.45 4.13
 19 -10 -3 65.56 4.72
 -19 -10 3 59.41 3.68
 19 10 -3 54.04 4.15
 -19 -10 -3 64.68 3.68
 -19 -10 -3 68.43 3.66
 19 11 3 0.19 0.34
 19 -11 -3 0.68 0.72
 -19 -11 3 0.33 0.3
 -19 -11 3 0.44 0.26
 -19 -11 -3 0.35 0.28
 19 -11 3 0.56 0.33
 -19 -11 -3 0.65 0.28
 19 11 -3 0.6 0.42
 -19 -12 3 11.59 0.82
 -19 -12 3 10.05 0.85
 19 12 3 10.36 0.98
 19 -12 3 13.58 1.04
 19 12 -3 9.5 1.02
 -19 -12 -3 11.35 0.87
 19 -12 3 5.33 3.09
 -19 -12 -3 12.19 0.83
 -19 -13 3 0.46 0.29
 -19 -13 3 0.27 0.25
 19 13 3 1.13 0.37
 19 13 -3 0.58 0.36
 19 -13 3 1.44 2.58
 -19 -13 -3 0.74 0.28
 19 -13 3 1.16 0.35
 -19 -13 -3 0.69 0.29
 -19 -14 3 31.45 1.86
 -19 -14 3 26.72 1.9
 19 14 3 33.28 2.16
 19 14 -3 34.43 2.18
 -19 -14 -3 31 1.88
 -19 -14 -3 29.92 1.9
 19 15 3 -0.02 0.25
 -19 -15 3 -0.04 0.21
 -19 -15 3 -0.02 0.22
 -19 -15 -3 0.01 0.23
 -19 -15 -3 -0.07 0.21
 19 15 -3 -0.02 0.25
 -19 -16 3 8.62 0.71
 19 16 3 10.91 0.82
 -19 -16 -3 10.6 0.69
 -19 -16 -3 7.95 0.69
 19 16 -3 11.09 0.83
 20 0 3 0.06 0.28
 20 0 -3 0 0.27
 20 0 -3 0.67 0.54
 20 -1 -3 0.06 0.28
 20 -1 -3 -0.21 0.46
 20 1 3 -0.14 0.26
 20 -1 3 0.12 0.28
 20 1 -3 0.01 0.27
 20 1 -3 -0.7 0.48
 20 -2 -3 2.04 0.6
 20 -2 -3 1.27 0.36
 20 2 3 1.99 0.36
 20 -2 3 1.73 0.39
 20 -2 3 1.67 0.64
 20 2 -3 2.08 0.58
 20 2 -3 1.46 0.33
 20 -3 -3 0.69 0.53
 20 -3 -3 0.69 0.33
 20 3 3 0.27 0.28
 20 3 -3 0.45 0.28
 20 -3 3 0.26 0.3
 20 -3 3 0.88 0.61
 20 3 -3 0.45 0.54
 20 -4 -3 1.5 0.41
 20 4 3 1.31 0.33
 20 -4 -3 1.55 0.57
 20 4 -3 1.73 0.64
 20 -4 3 1.52 0.4
 20 -4 3 1.9 0.7
 20 -5 -3 9.4 0.93
 20 5 3 8.31 0.82
 20 -5 -3 7.97 1.17
 20 -5 3 8.29 1.26
 20 -5 3 10.54 0.9
 20 5 -3 8.5 1.24
 20 6 3 0.21 0.28
 20 -6 -3 -0.22 0.53
 20 -6 -3 0.05 0.38
 20 -6 3 0.96 0.37
 20 -6 3 0.4 0.65
 20 -7 -3 1.06 0.59
 20 -7 -3 0.73 0.43
 -20 -7 3 0.15 0.26
 20 7 3 0.27 0.3
 -20 -7 3 0.36 0.31
 20 -7 3 -0.04 0.33
 20 -7 3 -0.07 0.69
 -20 -8 3 0.1 0.26
 20 -8 -3 -0.65 0.55
 -20 -8 3 0.31 0.28
 20 8 3 -0.08 0.29
 20 -8 -3 -0.48 0.43
 20 8 3 -0.09 0.38
 20 -8 3 -0.09 0.71
 -20 -8 -3 -0.55 0.23
 -20 -8 -3 -0.07 0.25
 20 -8 3 -0.11 0.35
 20 -9 -3 1.02 0.66
 20 9 3 0.34 0.37
 -20 -9 3 0.55 0.26
 20 -9 -3 0.23 0.45
 -20 -9 3 0.22 0.28
 -20 -9 -3 0.75 0.29
 -20 -9 -3 0.5 0.25
 20 -9 3 -0.29 0.32
 20 -10 -3 -0.12 0.65
 -20 -10 3 0.05 0.24
 -20 -10 3 0.74 0.3
 20 10 3 0.15 0.35
 -20 -10 -3 0.19 0.27
 -20 -10 -3 0.48 0.26
 20 -10 3 0.39 0.36
 -20 -11 3 0.2 0.24
 -20 -11 3 -0.18 0.24
 20 -11 -3 0.04 0.65
 20 11 3 -0.19 0.34
 20 11 -3 -0.21 0.38
 20 -11 3 0.03 0.33
 -20 -11 -3 0.22 0.24
 -20 -11 -3 -0.35 0.24
 20 -12 -3 2.12 0.54
 -20 -12 3 1.69 0.33
 -20 -12 3 1.76 0.31
 20 12 3 2.08 0.44
 20 -12 3 3.12 0.54
 20 12 -3 1.55 0.43
 -20 -12 -3 1.86 0.34
 -20 -12 -3 1.54 0.3
 20 13 3 0.85 0.36
 -20 -13 3 0.4 0.25
 -20 -13 3 0.72 0.25
 -20 -13 -3 0.22 0.24
 20 13 -3 0.55 0.35
 -20 -13 -3 0.39 0.26
 20 14 3 0.72 0.29
 -20 -14 3 0.66 0.25
 -20 -14 3 0.54 0.22
 -20 -14 -3 0.69 0.25
 20 14 -3 0.8 0.32
 -20 -14 -3 0.94 0.25
 20 15 3 0.18 0.25
 -20 -15 3 0 0.18
 -20 -15 3 -0.31 0.2
 20 15 -3 0.19 0.26
 -20 -15 -3 -0.16 0.2
 -20 -15 -3 -0.06 0.2
 21 0 -3 0.11 0.51
 21 0 3 0.37 0.29
 21 0 -3 -0.12 0.28
 21 1 3 8.35 0.76
 21 -1 -3 6.4 0.74
 21 -1 -3 8.01 1.12
 21 1 -3 7.86 1.1
 21 -1 3 8.52 0.77
 21 1 -3 5.78 0.7
 21 -2 -3 36.81 2.91
 21 2 3 36.56 2.63
 21 -2 -3 34.87 2.65
 21 2 -3 33.62 2.6
 21 -2 3 43.23 2.68
 21 2 -3 38.5 2.94
 21 -3 -3 5.06 0.65
 21 -3 -3 3.2 0.74
 21 3 3 4.44 0.58
 21 3 -3 4.57 0.81
 21 -3 3 4.31 0.85
 21 -3 3 5.45 0.66
 21 4 3 2.18 0.4
 21 -4 -3 1.49 0.63
 21 -4 -3 2.59 0.5
 21 4 -3 2.52 0.72
 21 -4 3 2.32 0.46
 21 -4 3 0.89 0.7
 21 -5 -3 12.03 1.08
 21 -5 -3 9.44 1.29
 21 5 3 9.98 0.94
 21 -5 3 12.35 1.43
 21 -5 3 12.13 1.04
 21 6 3 22.34 1.84
 21 -6 -3 28.47 2.02
 21 -6 -3 22.29 2.17
 21 -6 3 29.98 1.96
 21 -6 3 22.64 2.23
 -21 -7 3 5.64 0.62
 21 7 3 6.61 0.72
 21 -7 -3 6.11 0.99
 21 -7 -3 9.89 0.96
 21 -7 3 8.6 0.85
 21 -7 3 7.54 1.34
 -21 -8 3 2.79 0.44
 21 -8 -3 2.68 0.76
 21 -8 -3 4.91 0.78
 21 8 3 3.15 0.52
 -21 -8 3 2.27 0.4
 21 -8 3 4.37 0.63
 -21 -8 -3 2.18 0.38
 21 -8 3 2.44 0.83
 -21 -9 3 3.41 0.53
 21 9 3 4.06 0.63
 21 -9 -3 5.22 0.8
 21 -9 -3 4.86 0.93
 -21 -9 3 4.55 0.5
 -21 -9 -3 4.07 0.53
 -21 -9 -3 4.44 0.5
 21 -9 3 4.92 0.66
 -21 -10 3 14.15 1
 21 10 3 14.91 1.26
 -21 -10 3 14.79 1.05
 21 -10 -3 14.94 1.63
 -21 -10 -3 14.63 1.05
 -21 -10 -3 16.05 1.01
 21 11 3 8.04 0.9
 21 -11 -3 13.02 1.08
 -21 -11 3 8.07 0.68
 -21 -11 3 7.89 0.73
 -21 -11 -3 8.83 0.72
 -21 -11 -3 10.46 0.7
 -21 -12 3 6.9 0.55
 21 12 3 6.72 0.77
 -21 -12 3 6.26 0.6
 -21 -12 -3 6.96 0.59
 -21 -12 -3 7.21 0.58
 21 12 -3 5.12 0.8
 21 13 3 5.62 0.68
 -21 -13 3 5.66 0.48
 -21 -13 3 4.59 0.51
 21 13 -3 6.69 0.74
 -21 -13 -3 5.64 0.52
 -21 -13 -3 5.86 0.51
 -21 -14 3 8.47 0.59
 -21 -14 3 7.01 0.63
 21 14 3 9.57 0.77
 -21 -14 -3 6.83 0.61
 21 14 -3 9.76 0.81
 22 0 3 -0.07 0.29
 22 0 -3 -0.31 0.53
 22 0 -3 -0.46 0.27
 22 -1 -3 -0.01 0.3
 22 -1 -3 -0.52 0.54
 22 1 3 0.34 0.29
 22 1 -3 -0.13 0.55
 22 -1 3 -0.24 0.3
 22 1 -3 0.21 0.29
 22 -2 -3 4.76 0.62
 22 2 3 4.26 0.58
 22 -2 -3 3.92 0.79
 22 2 -3 3.93 0.57
 22 -2 3 4.75 0.62
 22 2 -3 4.34 0.81
 22 -3 -3 1.02 0.38
 22 3 3 0.79 0.3
 22 -3 -3 0.75 0.57
 22 -3 3 0.33 0.66
 22 -3 3 1.2 0.37
 22 3 -3 1.52 0.64
 22 -4 -3 0.5 0.56
 22 4 3 0.16 0.28
 22 -4 -3 -0.1 0.37
 22 -4 3 0.2 0.34
 22 -4 3 -0.47 0.63
 22 -5 -3 -0.06 0.55
 22 5 3 0.45 0.29
 22 -5 -3 0.68 0.4
 22 -5 3 1.21 0.4
 22 -5 3 -0.34 0.65
 22 -6 -3 3.08 0.76
 22 -6 -3 2.82 0.58
 22 6 3 2.7 0.51
 22 -6 3 2.62 0.82
 22 -6 3 3.39 0.63
 22 -7 -3 0.37 0.6
 22 7 3 -0.21 0.27
 22 -7 -3 0.27 0.47
 -22 -7 3 0.5 0.26
 22 -7 3 -0.15 0.7
 22 -7 3 -0.33 0.35
 22 -8 -3 0.77 0.5
 -22 -8 3 0.06 0.25
 -22 -8 3 -0.13 0.24
 22 -8 -3 0.52 0.61
 -22 -8 -3 0.1 0.26
 22 -8 3 0.05 0.35
 -22 -9 3 1.73 0.34
 -22 -9 3 1.62 0.29
 22 -9 -3 1.9 0.7
 22 -9 -3 1.6 0.57
 -22 -9 -3 1.6 0.32
 22 -9 3 1.86 0.44
 -22 -9 -3 1.69 0.29
 -22 -10 3 0.99 0.25
 -22 -10 3 0.9 0.28
 22 -10 -3 0.56 0.59
 -22 -10 -3 1.54 0.28
 -22 -10 -3 1.14 0.28
 22 11 3 0.88 0.4
 -22 -11 3 0.45 0.22
 -22 -11 3 1.07 0.28
 -22 -11 -3 1.14 0.25
 -22 -11 -3 0.92 0.27
 -22 -12 3 0.17 0.2
 -22 -12 3 0.05 0.22
 22 12 3 -0.46 0.33
 -22 -12 -3 0.61 0.23
 -22 -12 -3 0.21 0.21
 -22 -13 3 1.34 0.23
 -22 -13 3 1.26 0.26
 22 13 3 1.59 0.37
 -22 -13 -3 1.33 0.24
 -22 -13 -3 0.71 0.23
 23 0 -3 0.62 0.32
 23 0 -3 0.22 0.58
 23 0 3 0.4 0.32
 23 -1 -3 15.34 1.33
 23 1 3 18.33 1.35
 23 -1 -3 17.93 1.68
 23 1 -3 16.64 1.7
 23 -1 3 19.51 1.39
 23 1 -3 15.94 1.32
 23 2 3 1.46 0.34
 23 -2 -3 1.72 0.39
 23 -2 -3 0.66 0.59
 23 -2 3 2.91 0.53
 23 2 -3 0.49 0.65
 23 3 3 7.92 0.76
 23 -3 -3 6.93 0.82
 23 -3 -3 7.52 1.16
 23 -3 3 9.37 0.83
 23 -4 -3 1.97 0.46
 23 4 3 1.01 0.33
 23 -4 -3 1.45 0.65
 23 -4 3 2.34 0.45
 23 -4 3 2.77 0.8
 23 -5 -3 23.15 2.19
 23 -5 -3 28.23 2.01
 23 5 3 23.49 1.87
 23 -5 3 24.16 2.28
 23 -5 3 29.72 1.97
 23 -6 -3 2.19 0.53
 23 6 3 1.24 0.33
 23 -6 -3 1.46 0.68
 23 -6 3 2.02 0.45
 23 -6 3 0.7 0.71
 23 -7 -3 5.11 0.83
 -23 -7 3 3.32 0.45
 23 -7 -3 4 0.84
 23 -7 3 5.37 0.7
 23 -8 -3 0.5 0.6
 -23 -8 3 0.2 0.23
 -23 -8 -3 0.02 0.22
 -23 -9 3 15.39 1.08
 -23 -9 3 15.76 1.04
 23 -9 -3 13.86 1.6
 -23 -9 -3 18.39 1.06
 -23 -10 3 1.11 0.29
 -23 -10 3 0.93 0.24
 -23 -10 -3 1.22 0.28
 -23 -10 -3 2.55 0.35
 -23 -11 3 1.44 0.28
 -23 -11 3 1.3 0.24
 -23 -11 -3 1.26 0.26
 -23 -11 -3 1.56 0.25
 -23 -12 3 0.82 0.2
 -23 -12 -3 0.82 0.22
 24 0 3 0.32 0.31
 24 0 -3 -0.75 0.58
 24 -1 -3 6.74 1.12
 24 1 3 6.69 0.69
 24 -1 -3 6.94 0.73
 24 1 -3 4.84 0.94
 24 -1 3 6.82 0.72
 24 2 3 0.18 0.29
 24 -2 -3 0.19 0.58
 24 -2 -3 -0.01 0.34
 24 -2 3 -0.02 0.33
 24 -3 -3 2.78 0.74
 24 -3 3 3.22 0.6
 24 -4 -3 -0.18 0.57
 24 -5 -3 1.93 0.7
 24 -6 -3 -0.69 0.54
 24 -7 -3 0.23 0.59
 -24 -7 3 -0.31 0.21
 -24 -7 -3 0.08 0.23
 -24 -8 3 -0.16 0.21
 24 -8 -3 -0.04 0.56
 -24 -8 -3 0.4 0.22
 -24 -9 3 1.13 0.23
 -24 -9 -3 1.38 0.26
 -24 -10 3 -0.21 0.19
 -24 -10 -3 0.12 0.2
 25 0 -3 0.01 0.66
 25 -1 -3 4.1 0.85
 25 -2 -3 1.89 0.73
 25 -3 -3 3.1 0.79
 25 -4 -3 0.28 0.65
 25 -5 -3 8.22 1.2
 0 0 4 466.8 29.11
 0 -1 4 0.13 0.06
 0 -2 4 0.39 0.08
 0 3 4 0.23 0.11
 0 -3 4 0.02 0.06
 0 4 4 114 8.1
 0 -4 4 103.18 6.8
 0 5 4 0.15 0.17
 0 -5 4 0.18 0.09
 0 5 4 0.07 0.13
 0 -6 4 5.73 0.45
 0 6 4 6.06 0.53
 0 6 -4 5.47 0.46
 0 6 4 6.28 0.54
 0 -7 4 -0.08 0.11
 0 7 4 0.81 0.19
 0 7 4 0.32 0.2
 0 7 -4 0.1 0.12
 0 8 4 250.56 18.45
 0 8 -4 252.86 15.94
 0 8 4 248.1 15.99
 0 -8 4 239.56 15.52
 0 9 4 0.06 0.19
 0 9 4 0.06 0.17
 0 9 -4 0 0.14
 0 -9 4 0.13 0.13
 0 -10 4 32.74 2.19
 0 10 4 33.06 2.3
 0 10 4 34.61 2.6
 0 10 -4 33.3 2.25
 0 -11 4 -0.1 0.48
 0 11 4 0.23 0.19
 0 -11 4 0.39 0.16
 0 11 4 0.16 0.21
 0 11 -4 0.09 0.17
 0 12 4 135.24 9.55
 0 -12 4 127.05 8.03
 0 12 4 128.96 8.3
 0 -12 4 120.71 14.91
 0 -12 -4 120.55 14.77
 0 12 -4 126.88 8.24
 0 13 -4 -0.07 0.17
 0 -13 -4 0.39 0.46
 0 13 4 -0.06 0.2
 0 -13 4 -0.01 0.16
 0 -13 4 -0.22 0.45
 0 13 4 0.3 0.25
 0 14 4 24.16 1.75
 0 14 -4 23.9 1.69
 0 -14 -4 25.82 3.31
 0 14 4 22.83 1.95
 0 -14 4 23.32 1.65
 0 -14 4 25.17 3.44
 0 15 4 0.09 0.17
 0 15 -4 0.09 0.2
 0 15 4 -0.17 0.23
 0 15 4 0.32 0.26
 0 -15 -4 0.09 0.44
 0 -15 4 0.16 0.5
 0 -15 4 0.02 0.2
 0 16 -4 49.98 2.84
 0 16 -4 44.59 3.29
 0 16 4 48.14 3.36
 0 -16 4 52.26 6.24
 0 16 4 48.07 2.83
 0 -16 -4 52.21 6.13
 0 17 4 -0.14 0.25
 0 -17 4 0 0.48
 0 17 4 -0.14 0.17
 0 -17 -4 -0.02 0.43
 0 -17 4 -0.23 0.47
 0 17 -4 0.05 0.19
 0 -18 4 51.09 6.14
 0 18 -4 47.99 2.8
 0 18 4 48.02 2.79
 0 18 4 45.34 3.3
 0 19 -4 0.01 0.18
 0 19 4 0.02 0.18
 0 19 4 -0.07 0.18
 0 -19 4 -0.19 0.44
 0 20 -4 53.04 2.99
 0 20 4 48.55 2.98
 0 20 -4 51.81 2.97
 0 -20 4 51.94 6.38
 0 20 4 49.83 2.95
 0 21 4 -0.01 0.18
 0 21 4 0.09 0.17
 0 21 -4 -0.03 0.18
 0 -21 4 -0.1 0.4
 0 21 -4 -0.31 0.18
 0 -22 4 39.11 4.8
 0 22 4 34.95 2.21
 0 22 4 39.66 2.24
 0 22 -4 38.49 2.24
 0 23 4 -0.22 0.14
 0 23 4 -0.27 0.14
 0 23 -4 -0.04 0.16
 0 24 4 20.06 1.21
 -1 0 -4 2.46 0.17
 1 0 4 2.21 0.18
 -1 1 -4 3.06 0.19
 -1 -1 4 2.77 0.2
 1 -1 4 2.48 0.21
 -1 2 -4 11.6 0.68
 1 2 4 11.2 0.87
 -1 -2 4 10.2 0.72
 1 -2 4 12.32 0.68
 1 -2 4 10.08 0.73
 1 3 4 13.13 1.02
 -1 -3 4 12.24 0.85
 1 -3 4 12.62 0.86
 1 -3 4 14.05 0.79
 -1 -4 4 58.89 3.98
 1 4 4 66.95 4.76
 1 -4 4 60.78 3.99
 -1 4 4 59.64 4.74
 1 -4 4 70.44 3.81
 1 5 4 9.3 0.72
 -1 -5 4 8.4 0.61
 1 5 4 9.38 0.75
 1 -5 4 8.85 0.63
 -1 5 4 9.13 0.74
 -1 -6 4 2.01 0.23
 1 6 4 2.31 0.36
 -1 6 -4 2.05 0.25
 1 6 4 2.62 0.31
 1 -6 4 2.01 0.25
 -1 6 4 2.12 0.29
 1 6 -4 2.12 0.26
 -1 6 4 1.76 0.31
 -1 -7 4 28.12 1.82
 1 7 4 29.11 1.93
 -1 7 -4 29.07 1.87
 1 7 4 29.56 2.18
 -1 7 4 29.32 2.17
 -1 7 4 25.34 1.91
 1 7 -4 25.56 1.87
 1 -7 4 28.34 1.83
 1 8 4 10.26 0.79
 -1 -8 4 8.97 0.69
 1 8 4 9.45 0.83
 -1 8 -4 9.46 0.71
 1 -8 4 9.75 0.71
 -1 8 4 10.04 0.82
 1 8 -4 9.9 0.72
 -1 8 4 8.73 0.76
 1 9 4 3.63 0.45
 1 9 4 3.69 0.43
 -1 9 -4 3.31 0.36
 -1 -9 4 3.71 0.35
 -1 9 4 3.91 0.42
 -1 9 4 3.27 0.43
 1 -9 4 3.13 0.36
 1 9 -4 3.56 0.38
 1 10 4 6.39 0.64
 -1 -10 4 6.79 0.53
 -1 10 -4 6.26 0.55
 1 10 4 6.98 0.63
 1 10 -4 6.82 0.57
 -1 10 4 6.24 0.6
 -1 10 4 6.01 0.63
 1 -10 4 6.65 0.55
 1 11 4 1.93 0.34
 -1 11 -4 1.85 0.3
 -1 -11 4 1.13 0.58
 1 11 4 1.76 0.34
 -1 -11 4 2.29 0.29
 1 -11 4 1.1 0.7
 -1 11 4 1.48 0.32
 -1 11 4 1.61 0.31
 1 -11 4 1.73 0.29
 1 11 -4 2.33 0.34
 -1 12 -4 1.02 0.24
 1 12 4 1.02 0.29
 -1 -12 4 0.16 0.49
 1 12 4 0.97 0.28
 1 12 -4 0.99 0.24
 -1 -12 -4 0.74 0.5
 1 -12 4 0.53 0.62
 1 -12 4 1.3 0.24
 -1 12 4 0.99 0.28
 -1 12 4 1.23 0.28
 1 -13 -4 8.1 1.5
 -1 -13 4 7.14 0.63
 -1 -13 4 6.77 1.56
 1 13 4 8.3 0.77
 -1 13 -4 7.66 0.65
 1 13 4 7.71 0.72
 -1 -13 -4 8.16 1.57
 -1 13 4 7.91 0.72
 1 13 -4 7.99 0.67
 -1 13 4 7.17 0.74
 1 -13 4 7.47 0.65
 1 -13 4 7.16 1.66
 -1 14 -4 -0.02 0.21
 -1 -14 4 0.04 0.48
 1 14 4 -0.04 0.23
 1 -14 -4 0.14 0.47
 1 14 4 0.3 0.26
 -1 14 4 0.21 0.24
 -1 14 4 0.15 0.25
 1 -14 4 0.17 0.2
 1 -14 4 -0.28 0.43
 -1 -14 -4 0.07 0.45
 1 14 -4 0.01 0.2
 1 15 4 3.35 0.35
 -1 15 -4 4.25 0.45
 -1 -15 4 2.49 0.81
 1 -15 -4 2.06 0.71
 1 15 4 3.15 0.48
 1 15 4 3.42 0.48
 -1 15 4 3.26 0.48
 1 -15 4 1.01 0.52
 1 15 -4 3.88 0.46
 1 -15 4 2.14 0.78
 -1 -15 -4 1.87 0.69
 1 15 -4 3.67 0.35
 1 -15 4 2.77 0.4
 1 -16 -4 1.23 0.6
 -1 -16 4 1.84 0.71
 1 16 4 1.3 0.36
 1 16 4 1.5 0.23
 1 16 4 1.94 0.3
 1 -16 4 1.17 0.66
 -1 16 4 1.28 0.36
 1 16 -4 1.52 0.23
 1 -16 4 1.17 0.57
 1 -16 4 1.07 0.3
 -1 -16 -4 0.98 0.57
 1 16 -4 1.31 0.32
 1 -17 -4 0.09 0.45
 1 17 4 0.09 0.19
 -1 -17 4 -0.18 0.46
 1 17 4 0.35 0.27
 1 17 4 -0.1 0.19
 1 17 -4 0.09 0.18
 -1 17 4 0.18 0.27
 -1 -17 -4 -0.17 0.43
 1 17 -4 0.36 0.25
 1 -17 4 -0.13 0.42
 1 -17 4 0.14 0.53
 1 18 4 0.76 0.22
 -1 -18 4 0.75 0.57
 1 18 4 0.69 0.32
 1 -18 -4 0.59 0.53
 1 18 4 0.9 0.23
 1 18 -4 0.79 0.23
 1 -18 4 0.58 0.58
 -1 18 4 0.75 0.33
 1 18 -4 1.33 0.23
 -1 -19 4 0.1 0.48
 1 19 4 0.01 0.19
 1 19 4 0.14 0.18
 1 19 -4 -0.11 0.18
 1 -19 4 0.11 0.45
 1 19 -4 0.25 0.19
 1 20 4 0.81 0.23
 1 20 4 1.52 0.24
 -1 -20 4 0.62 0.55
 -1 20 4 1.11 0.22
 1 20 -4 2.12 0.32
 1 -20 4 0.71 0.55
 1 20 -4 1.04 0.23
 -1 -21 4 0.27 0.43
 1 21 4 -0.03 0.17
 1 21 4 0.12 0.17
 -1 21 4 0.03 0.18
 1 -21 4 0.05 0.4
 1 21 -4 0.28 0.18
 1 21 -4 0.31 0.19
 1 22 4 0.19 0.18
 1 22 4 -0.28 0.17
 -1 -22 4 -0.03 0.38
 -1 22 -4 0.19 0.18
 1 22 -4 0.26 0.18
 1 -22 4 0.26 0.41
 1 22 -4 -0.03 0.16
 -1 22 4 -0.14 0.17
 1 23 4 1.59 0.23
 -1 23 -4 1.98 0.3
 1 23 4 2.09 0.3
 1 23 -4 2.14 0.29
 -1 23 4 2.06 0.31
 1 23 -4 1.82 0.28
 1 24 4 -0.08 0.13
 1 24 -4 0.16 0.14
 -2 0 -4 517.24 29.96
 2 0 4 484.64 31.24
 2 1 4 98.33 7.62
 -2 1 -4 107.19 6.14
 2 -1 4 93.89 6.41
 -2 -1 -4 105.11 6.16
 2 -1 4 107.67 6.14
 -2 -2 4 2.51 0.22
 -2 2 -4 3.13 0.22
 2 2 4 3.35 0.32
 2 -2 4 2.72 0.24
 2 2 -4 3.26 0.2
 2 -2 4 3.41 0.21
 2 3 4 119.7 8.46
 -2 -3 4 102.46 7.09
 2 -3 4 121.76 6.8
 2 -3 4 109.97 7.11
 2 4 4 219.03 15.5
 -2 -4 4 213.24 12.46
 -2 -4 4 201.04 13.01
 2 4 4 201.87 13.42
 2 -4 4 191.93 13.03
 2 -4 4 222.16 12.47
 -2 -5 4 12.59 0.74
 -2 -5 4 11.82 0.8
 2 5 4 11.72 0.91
 2 5 4 13.03 0.98
 2 -5 4 12.72 0.83
 -2 5 4 10.8 0.95
 2 5 -4 11.68 0.84
 2 -5 4 11.77 1.03
 -2 -6 4 3.02 0.21
 2 6 4 3.28 0.37
 -2 -6 4 2.83 0.27
 -2 6 -4 2.29 0.28
 2 6 4 3.5 0.42
 2 -6 4 2.88 0.3
 -2 6 4 2.99 0.33
 2 6 -4 3.21 0.32
 2 7 4 119.54 8.23
 2 7 4 115.49 7.16
 -2 7 -4 106.86 7.09
 -2 -7 4 106.73 6.9
 2 7 -4 102.78 7.1
 -2 7 4 102.62 7.13
 2 -7 4 109.18 6.92
 -2 7 4 115.04 8.21
 2 8 4 155.04 10.72
 -2 8 -4 138.23 9.24
 -2 -8 4 139.51 9
 2 8 4 150.36 9.32
 2 8 -4 135.26 9.25
 2 -8 4 145.78 9.02
 -2 8 4 133.49 9.28
 -2 8 4 148.66 10.7
 -2 9 -4 9.69 0.72
 -2 -9 4 9.63 0.69
 2 9 4 10.22 0.85
 2 9 4 9.77 0.81
 2 -9 4 9.69 0.72
 -2 9 4 8.33 0.76
 -2 9 4 9.45 0.83
 2 9 -4 9.33 0.73
 2 10 4 22.02 1.51
 -2 10 -4 19.99 1.43
 2 10 4 21.39 1.67
 -2 -10 4 19.47 1.38
 2 10 -4 21.45 1.44
 2 -10 4 20.71 1.41
 -2 10 4 20.4 1.64
 -2 10 4 19.87 1.48
 -2 -11 4 42.28 2.87
 2 11 4 45.26 3.44
 -2 11 -4 43.62 2.95
 2 11 4 47.4 3.04
 2 -11 4 45.21 2.9
 -2 11 4 42.31 3
 2 11 -4 43.27 2.97
 -2 11 4 46.65 3.43
 -2 12 -4 88.74 5.84
 -2 -12 4 90.51 5.69
 2 12 4 96.05 6.79
 2 -12 -4 94.4 10.57
 -2 -12 4 87.05 10.61
 2 12 4 92.9 5.93
 2 12 -4 88.46 5.86
 2 -12 4 73.07 10.69
 -2 12 4 89.49 5.9
 2 -12 4 92.82 5.72
 -2 12 4 93.12 6.76
 -2 -12 -4 82.53 10.52
 2 -13 -4 0.81 0.55
 2 13 4 1.96 0.38
 -2 -13 4 1.35 0.6
 2 13 4 1.59 0.35
 -2 13 -4 2.03 0.34
 2 -13 4 1.99 0.34
 2 13 -4 1.56 0.3
 -2 13 4 1.43 0.32
 2 -13 4 1.31 0.7
 -2 -13 -4 1.72 0.61
 -2 13 4 2.32 0.41
 -2 14 -4 22.62 1.62
 2 14 4 23.57 1.71
 -2 -14 4 24.18 3.26
 2 -14 -4 23.96 3.2
 2 14 4 22.61 1.89
 -2 14 4 24 1.69
 2 14 -4 22.17 1.64
 2 -14 4 23.96 2.07
 2 -14 4 22.59 3.36
 -2 -14 -4 22.42 3.17
 2 -14 4 21.68 1.6
 2 15 4 31.08 2.15
 2 -15 -4 30.48 3.96
 2 15 4 26.4 1.77
 -2 -15 4 32.51 4.08
 2 15 4 29.54 2.4
 2 15 4 29.42 1.77
 2 -15 4 30.28 4.12
 -2 -15 -4 29.79 3.92
 2 -15 4 28.79 2.04
 -2 15 4 30.85 2.13
 2 -15 4 27.65 2.55
 2 15 -4 30.41 2.08
 2 15 -4 30.71 1.78
 -2 -16 4 27.33 3.62
 2 16 4 24.24 1.87
 2 16 4 23.76 2.1
 2 16 4 24.45 1.55
 2 16 4 26 1.55
 2 -16 -4 27.03 3.53
 -2 16 4 27.19 1.89
 -2 -16 -4 24.64 3.46
 2 -16 4 26.19 1.8
 2 16 -4 22.9 1.81
 2 16 -4 25.3 1.56
 2 -16 4 24.27 3.63
 2 -16 4 27.81 2.3
 2 16 -4 27.12 1.56
 2 17 4 -0.06 0.17
 2 17 4 0.21 0.19
 2 -17 -4 -0.28 0.46
 -2 -17 4 0.21 0.51
 2 17 4 0.16 0.27
 2 -17 4 0.05 0.53
 2 17 -4 0.25 0.24
 2 17 -4 0.19 0.19
 -2 17 4 -0.03 0.27
 2 -17 4 0.48 0.47
 2 17 -4 0.41 0.21
 -2 -18 4 12.65 2.07
 2 -18 -4 12.13 1.97
 2 18 4 11.33 1
 2 18 4 10.52 0.77
 2 18 4 10.92 0.77
 -2 18 4 12.44 1.01
 2 -18 4 8.97 1.23
 2 -18 4 12.65 2.13
 2 18 -4 10.98 0.78
 2 18 -4 10.8 0.79
 2 19 4 15.54 0.98
 2 19 4 14.61 0.98
 -2 -19 4 14.3 2.38
 2 -19 4 16.02 2.46
 2 19 -4 14.68 0.99
 2 19 -4 14.35 0.98
 2 20 4 29.75 1.83
 -2 -20 4 30.11 4.08
 2 20 4 30.46 1.84
 2 -20 4 29.36 4.09
 2 20 -4 31.39 1.84
 2 20 -4 30.85 1.84
 -2 -21 4 -0.07 0.39
 2 21 4 0.26 0.18
 2 21 4 0.49 0.18
 2 -21 4 0.15 0.43
 2 21 -4 0.19 0.18
 2 21 -4 0.12 0.19
 -2 -22 4 17.88 2.54
 2 22 4 19.11 1.12
 2 22 4 16.95 1.1
 2 -22 4 18.29 2.56
 2 22 -4 19.04 1.12
 2 22 -4 16.32 1.11
 -2 22 4 17.03 1.11
 -2 23 -4 16.07 1
 2 23 4 16.88 0.99
 2 23 4 14.8 0.98
 2 23 -4 16.98 0.99
 2 23 -4 14.01 0.98
 -2 23 4 15.78 0.99
 2 24 4 20.13 1.19
 2 24 -4 19.44 1.19
 3 0 4 2.03 0.17
 3 0 4 1.96 0.18
 -3 0 -4 2.13 0.18
 3 1 4 0.8 0.11
 3 1 4 0.87 0.18
 -3 1 -4 1.05 0.12
 -3 -1 -4 0.77 0.12
 3 -1 4 0.83 0.1
 3 1 -4 0.7 0.09
 3 -1 4 0.68 0.1
 -3 2 -4 8.87 0.54
 3 2 4 8.63 0.7
 3 -2 4 8.5 0.54
 -3 -2 -4 8.1 0.56
 3 2 -4 8.8 0.53
 3 -2 4 7.82 0.57
 3 3 4 1.45 0.25
 -3 -3 4 1.14 0.13
 -3 -3 -4 1.23 0.17
 3 3 -4 1.44 0.12
 3 -3 4 1.12 0.18
 3 -3 4 1.35 0.13
 3 4 4 0.45 0.18
 -3 -4 4 0.43 0.07
 -3 -4 4 0.39 0.09
 3 4 4 0.47 0.16
 3 -4 4 0.39 0.12
 3 -4 4 0.46 0.18
 3 -4 4 0.45 0.08
 3 4 -4 0.39 0.12
 -3 -5 4 17.46 1.19
 -3 -5 4 18.96 1.13
 3 5 4 18.15 1.31
 3 5 4 20.08 1.46
 3 -5 4 17.72 1.22
 3 5 -4 19.05 1.25
 3 -5 4 19.22 1.14
 3 -5 4 16.67 1.49
 3 6 4 0.34 0.21
 -3 -6 4 0.16 0.09
 -3 6 -4 0.15 0.12
 3 6 4 0.09 0.14
 -3 -6 4 0.19 0.06
 3 6 -4 0.16 0.13
 3 -6 4 0.08 0.12
 3 -6 4 -0.02 0.2
 -3 6 4 -0.11 0.11
 3 -6 4 -0.02 0.08
 -3 -7 4 2.32 0.19
 3 7 4 3.12 0.41
 -3 -7 4 2.16 0.24
 -3 7 -4 2.54 0.28
 3 7 4 2.69 0.35
 3 -7 4 2.21 0.47
 3 -7 4 2.7 0.3
 -3 7 4 2.44 0.31
 3 7 -4 2.33 0.3
 -3 8 -4 0.12 0.14
 -3 -8 4 0.15 0.11
 3 8 4 0.26 0.23
 3 8 4 0.06 0.17
 3 8 -4 0 0.14
 -3 8 4 -0.05 0.18
 3 -8 4 -0.1 0.13
 3 -8 4 0.31 0.29
 -3 8 4 0.36 0.16
 -3 9 -4 2.77 0.33
 3 9 4 3.57 0.42
 3 9 4 3.88 0.48
 -3 -9 4 3.08 0.31
 3 -9 4 2.09 0.48
 3 -9 4 3.07 0.36
 -3 9 4 3.09 0.38
 -3 9 4 3.3 0.41
 3 9 -4 2.84 0.38
 3 10 4 11.86 0.93
 -3 10 -4 9.37 0.77
 3 10 4 11.14 0.89
 -3 -10 4 9.87 0.74
 3 -10 4 6.81 1.01
 -3 10 4 10.64 0.89
 3 10 -4 10.62 0.81
 3 -10 4 11.2 0.79
 -3 10 4 9.82 0.83
 3 11 4 0.29 0.25
 3 11 4 0.72 0.24
 3 11 4 0.39 0.23
 -3 11 -4 0.38 0.18
 3 -11 4 -0.3 0.59
 3 11 -4 0.49 0.21
 -3 11 4 0.68 0.25
 3 -11 4 1.05 0.42
 -3 11 4 0.43 0.22
 3 -11 4 0.67 0.21
 3 12 4 1.12 0.32
 3 12 4 0.58 0.25
 -3 12 -4 0.61 0.21
 3 -12 4 0.65 0.38
 -3 12 4 0.76 0.27
 -3 12 4 0.65 0.24
 3 -12 4 0.65 0.22
 -3 -12 -4 0.36 0.43
 3 12 -4 0.64 0.23
 3 -12 4 0.19 0.64
 3 -13 -4 7.14 1.49
 -3 -13 4 6.61 1.45
 3 13 4 8.28 0.75
 3 13 4 7.23 0.74
 3 -13 4 7.19 0.65
 -3 -13 -4 5.96 1.47
 3 -13 4 7.56 0.96
 -3 13 4 7.61 0.7
 3 13 -4 7.26 0.66
 -3 -14 4 0.14 0.43
 3 14 4 0.01 0.23
 3 14 4 0.18 0.18
 3 14 4 0.2 0.27
 3 -14 -4 -0.06 0.44
 3 -14 4 -0.12 0.39
 3 14 -4 -0.1 0.15
 3 14 -4 0.12 0.2
 -3 -14 -4 0.16 0.48
 3 -14 4 0.03 0.5
 -3 14 4 0 0.22
 3 -14 4 -0.01 0.19
 -3 -15 4 15.05 2.33
 3 -15 -4 16.27 2.33
 3 15 4 12.97 0.91
 3 15 4 12.97 0.91
 3 15 4 14.04 1.16
 3 15 4 14.54 1.27
 3 15 -4 14.35 0.93
 3 -15 4 15.08 1.47
 3 15 -4 12.99 0.91
 3 -15 4 13.93 2.47
 -3 -15 -4 14.01 2.23
 3 15 -4 12.38 1.02
 -3 15 4 14.89 1.15
 3 -15 4 14.45 1.08
 3 15 -4 14.56 1.1
 3 16 4 0.21 0.3
 3 -16 -4 0.06 0.48
 3 16 4 0.28 0.19
 -3 -16 4 0.33 0.51
 3 16 4 0.2 0.27
 3 16 4 0.13 0.18
 3 16 -4 0.14 0.24
 3 -16 4 0.06 0.24
 3 -16 4 0.64 0.51
 3 16 -4 0.32 0.18
 -3 16 4 0.08 0.26
 3 16 -4 0.19 0.19
 -3 -16 -4 -0.29 0.44
 3 -16 4 -0.29 0.47
 3 -17 -4 0.35 0.51
 3 17 4 1.01 0.35
 -3 -17 4 0.43 0.53
 3 17 4 0.64 0.22
 3 17 4 0.61 0.23
 -3 17 4 1.19 0.34
 3 17 -4 0.99 0.23
 3 17 -4 1.18 0.31
 3 -17 4 0.03 0.54
 3 17 -4 0.72 0.21
 3 -17 4 0.5 0.5
 3 18 4 0.39 0.19
 3 -18 -4 0.05 0.52
 3 18 4 0.13 0.28
 3 18 4 0.27 0.18
 -3 -18 4 0.04 0.46
 3 -18 -4 0.32 0.51
 3 18 -4 0.06 0.25
 -3 18 4 -0.03 0.28
 3 18 -4 0.27 0.2
 3 -18 4 1.04 0.52
 3 -18 4 -0.09 0.49
 3 18 -4 0.09 0.19
 3 19 4 6.78 0.59
 -3 -19 4 9.12 1.72
 3 19 4 7.51 0.59
 3 -19 4 7.48 1.71
 3 19 -4 7.61 0.61
 3 19 -4 7.91 0.6
 -3 -20 4 -0.17 0.43
 3 20 4 0.37 0.19
 3 20 4 -0.02 0.17
 3 -20 4 -0.07 0.48
 3 20 -4 0.06 0.19
 3 20 -4 0.2 0.18
 3 21 4 2.23 0.34
 3 21 4 3.24 0.36
 -3 -21 4 1.74 0.65
 3 -21 4 3.76 1.16
 3 21 -4 2.73 0.35
 3 21 -4 3.15 0.36
 3 22 4 -0.09 0.16
 3 22 4 0.07 0.15
 3 -22 4 0.15 0.38
 3 22 -4 0.07 0.16
 3 22 -4 -0.07 0.16
 3 23 4 0.03 0.16
 3 23 4 0.02 0.14
 3 23 -4 0.27 0.15
 3 23 -4 0.1 0.15
 4 0 4 46.76 2.71
 4 0 4 42.29 2.82
 4 0 4 45.55 3.35
 -4 0 -4 44.46 2.71
 4 1 4 76.76 4.73
 4 1 4 80.46 4.55
 -4 1 -4 77.22 4.54
 4 1 4 75.23 5.63
 4 -1 4 68.13 4.73
 4 1 -4 72.08 4.53
 -4 -1 -4 76.15 4.55
 4 -1 4 77.43 4.54
 -4 2 -4 2.05 0.2
 4 2 4 2.24 0.28
 4 2 -4 2.29 0.18
 4 -2 4 2.09 0.3
 -4 -2 -4 2.37 0.21
 4 -2 4 2.04 0.21
 4 -2 4 2.42 0.18
 4 3 4 68.08 5.02
 4 3 -4 72.24 4.02
 4 -3 4 71.37 4.03
 4 -3 4 65.85 4.21
 4 -3 4 60.36 5.04
 4 3 -4 66.26 4.32
 -4 -3 -4 63.08 4.05
 4 4 4 30.06 1.84
 4 4 4 29.43 2.1
 -4 -4 4 25.15 1.71
 -4 -4 4 28.93 1.65
 4 -4 4 22.85 2.11
 4 -4 4 26.03 1.75
 -4 -4 -4 24.87 1.69
 4 4 -4 28.5 1.8
 4 -4 4 28.82 1.66
 4 5 4 54.69 4
 -4 -5 4 54.12 3.18
 -4 -5 4 48.81 3.32
 4 5 4 55.68 3.5
 4 -5 4 57.44 3.2
 4 -5 4 54.6 3.36
 4 -5 4 54.11 4.04
 -4 -5 -4 43.81 3.23
 4 5 -4 52.12 3.45
 4 6 4 0.33 0.22
 4 6 4 0.58 0.19
 -4 -6 4 0.52 0.11
 -4 -6 4 0.43 0.08
 -4 6 -4 0.57 0.14
 4 6 -4 0.29 0.14
 -4 6 4 -0.06 0.14
 4 -6 4 0.35 0.15
 4 -6 4 0.48 0.23
 4 -6 4 0.59 0.11
 -4 -7 4 159.3 10.64
 4 7 4 174.93 11.04
 -4 7 -4 150.39 10.94
 4 7 4 181.51 12.7
 -4 7 4 161.46 12.66
 4 -7 4 188.96 10.22
 4 7 -4 167.13 10.97
 4 -7 4 177.16 10.69
 4 8 4 5.64 0.6
 4 8 4 5.67 0.57
 -4 8 -4 5.11 0.47
 4 -8 4 5.2 0.69
 4 8 -4 5.22 0.51
 4 -8 4 6.01 0.42
 -4 8 4 5.63 0.54
 4 -8 4 5.93 0.49
 4 9 4 127 9.02
 -4 9 -4 116.7 7.76
 4 9 4 122.81 7.86
 4 9 -4 112.58 7.78
 4 -9 4 124.18 9.12
 -4 9 4 107.97 7.8
 -4 9 4 124.03 8.98
 4 -9 4 124.2 7.59
 4 10 4 2.73 0.4
 4 10 4 3.03 0.48
 -4 10 -4 2.1 0.32
 -4 10 4 2.03 0.38
 4 10 -4 2.45 0.38
 4 -10 4 3.09 0.36
 4 -10 4 2.41 0.51
 -4 10 4 2.8 0.37
 4 11 4 168.16 10.48
 -4 11 -4 151.2 10.36
 4 -11 -4 154.05 18.53
 4 11 4 166.42 12.03
 4 11 4 139.42 10.72
 -4 11 4 167.21 12
 4 11 -4 156.87 10.39
 4 -11 4 171.21 10.14
 -4 11 4 158.42 10.42
 4 -11 4 171.28 12.18
 4 12 4 1.03 0.29
 4 12 4 0.92 0.35
 4 12 4 0.67 0.27
 4 -12 -4 0.7 0.48
 4 -12 4 0.18 0.68
 4 -12 4 1.14 0.42
 -4 12 4 0.99 0.29
 -4 -12 -4 0.92 0.48
 4 12 -4 1.02 0.26
 4 -12 4 0.69 0.23
 4 13 4 15.6 1.3
 4 -13 -4 17.97 2.53
 4 13 4 15.71 1.41
 -4 -13 -4 16.76 2.42
 4 13 -4 15.75 1.23
 -4 13 4 16.57 1.27
 4 -13 4 16.63 1.22
 4 -13 4 17.91 1.6
 4 14 4 3.94 0.55
 -4 -14 4 4.33 1.2
 4 14 4 3.42 0.35
 4 14 4 3.64 0.49
 4 -14 -4 2.11 0.76
 4 -14 4 3.88 0.75
 4 -14 4 1.92 0.84
 4 -14 4 3 0.42
 -4 -14 -4 2.13 0.71
 4 14 -4 3.8 0.37
 4 14 -4 3.43 0.45
 -4 14 4 3.86 0.49
 4 15 4 123.42 7.76
 4 15 4 130.25 8.95
 4 -15 -4 146.19 16.01
 4 15 4 147.12 7.69
 4 15 4 135.32 10.3
 -4 -15 4 142.49 16
 4 15 -4 131.54 8.63
 4 -15 4 136.21 8.69
 4 15 -4 133.01 8.89
 4 15 -4 144.12 7.7
 -4 -15 -4 127.54 15.89
 4 15 -4 132.8 7.77
 -4 15 4 141.76 8.94
 4 -15 4 128.18 16.18
 4 -15 4 143.22 10.47
 -4 -16 4 4.48 1.31
 4 16 4 3.25 0.38
 4 16 4 3.59 0.38
 4 -16 -4 4.51 1.36
 4 16 4 3.45 0.55
 4 16 -4 3.52 0.44
 4 16 -4 3.09 0.38
 4 -16 4 2.09 0.9
 -4 16 4 3.02 0.51
 4 16 -4 3.8 0.39
 4 -16 4 4.26 0.76
 4 16 -4 3.13 0.45
 -4 -17 4 1.82 0.73
 4 17 4 2.28 0.48
 4 17 4 3.15 0.36
 4 17 4 2.58 0.36
 4 -17 -4 1.79 0.74
 4 -17 -4 1.45 0.72
 -4 17 4 2.14 0.46
 4 -17 4 2.73 0.66
 4 17 -4 3.72 0.38
 4 17 -4 3.73 0.38
 4 -17 4 1.36 0.76
 4 17 -4 2.31 0.41
 4 18 4 1.11 0.22
 4 18 4 1.08 0.23
 4 -18 -4 0.99 0.56
 -4 -18 4 0.88 0.58
 4 18 -4 1.13 0.24
 4 18 -4 0.83 0.22
 4 -18 4 0.54 0.59
 4 19 4 93.97 5.55
 -4 -19 4 101.83 11.66
 4 19 4 101.89 5.61
 4 19 -4 95.4 5.56
 4 19 -4 94.81 5.6
 4 20 4 2.46 0.34
 4 20 4 2.23 0.32
 -4 -20 4 1.55 0.64
 4 -20 4 1.27 0.67
 4 20 -4 3.07 0.35
 4 20 -4 2.62 0.34
 4 21 4 0.54 0.19
 4 21 4 0.49 0.19
 -4 -21 4 0.32 0.42
 4 21 -4 0.5 0.19
 4 21 -4 0.34 0.19
 4 -21 4 0.04 0.43
 4 22 4 1.99 0.3
 4 22 4 1.7 0.26
 4 22 -4 1.24 0.23
 4 22 -4 1.3 0.22
 4 23 4 50.38 2.73
 4 23 4 45.02 2.7
 4 23 -4 44.72 2.71
 4 23 -4 47.79 2.73
 5 0 4 3.95 0.3
 5 0 -4 3.75 0.3
 5 0 4 4.28 0.3
 -5 0 -4 4.2 0.31
 5 0 4 4.4 0.36
 5 1 4 104.87 5.96
 5 1 4 100.93 7.38
 -5 1 -4 99.82 5.96
 5 1 4 96.52 6.19
 5 -1 4 93.73 6.2
 5 -1 4 99.34 5.95
 5 1 -4 92.18 5.94
 5 -1 4 103.58 7.42
 -5 -1 -4 99.55 5.96
 -5 2 -4 10.06 0.62
 5 2 4 10.16 0.79
 5 -2 4 8.6 0.64
 5 -2 4 8.1 0.79
 5 2 -4 10 0.6
 5 -2 4 9.37 0.61
 -5 -2 -4 9.44 0.63
 5 -3 -4 2.5 0.37
 5 3 4 2.46 0.26
 5 3 4 1.99 0.3
 -5 -3 -4 2.3 0.23
 5 3 -4 2.04 0.24
 5 -3 4 2.05 0.19
 5 -3 4 2.25 0.24
 5 3 -4 2.19 0.19
 5 -3 4 2.36 0.34
 5 4 4 0.77 0.18
 -5 -4 4 0.57 0.1
 5 4 4 0.42 0.17
 5 -4 4 0.49 0.1
 -5 -4 -4 0.45 0.13
 5 4 -4 0.6 0.1
 5 -4 4 0.89 0.22
 5 -4 4 0.73 0.14
 5 4 -4 0.77 0.14
 -5 -5 4 1.8 0.17
 5 5 4 2.21 0.33
 5 5 4 1.82 0.31
 5 -5 4 1.96 0.26
 5 -5 4 1.81 0.38
 5 -5 4 2.07 0.2
 5 5 -4 1.88 0.26
 -5 6 -4 0.65 0.17
 5 6 4 0.68 0.24
 -5 -6 4 1 0.12
 5 6 4 0.76 0.22
 5 -6 4 0.82 0.13
 5 6 -4 0.4 0.16
 5 -6 4 1.04 0.19
 5 -6 4 0.64 0.27
 5 7 4 2.76 0.37
 5 7 4 2.29 0.4
 -5 7 -4 1.41 0.27
 5 7 -4 2.19 0.31
 5 -7 4 2.28 0.22
 -5 7 4 1.95 0.31
 5 -7 4 2.05 0.3
 5 -7 4 2.35 0.47
 5 8 4 0.13 0.23
 5 8 4 -0.12 0.17
 -5 8 -4 0.13 0.15
 5 8 -4 0.27 0.17
 5 -8 4 0.24 0.12
 -5 8 4 0.09 0.13
 5 -8 4 -0.03 0.25
 5 -8 4 0.05 0.16
 5 9 4 1.87 0.36
 5 9 4 2.42 0.41
 -5 9 4 2.25 0.33
 5 -9 4 1.89 0.45
 5 -9 4 2.76 0.34
 5 9 -4 1.9 0.35
 5 10 4 7.64 0.72
 5 10 4 6.02 0.65
 5 10 4 6.9 0.72
 -5 10 4 7.26 0.67
 -5 10 4 7.45 0.66
 5 10 -4 7.22 0.64
 5 -10 4 7.73 0.62
 5 -10 4 6.81 0.87
 5 11 4 13.56 1.14
 5 11 4 15.28 1.21
 5 11 4 15.36 1.28
 5 -11 -4 16.49 2.21
 5 11 -4 13.45 1.1
 -5 11 4 14.34 1.14
 5 -11 4 14.21 1.42
 5 -11 4 16.24 1.1
 5 12 4 -0.03 0.25
 5 -12 -4 0.05 0.42
 5 12 4 0.26 0.24
 5 12 4 0.29 0.29
 5 -12 4 0.33 0.37
 5 12 -4 0.21 0.2
 5 -12 4 0.08 0.18
 -5 12 4 0.05 0.24
 5 -12 4 0.45 0.73
 5 13 4 7.15 0.79
 5 13 4 7.63 0.73
 5 13 4 8.17 0.8
 5 -13 -4 7.19 1.6
 5 -13 4 8.64 0.7
 -5 13 4 7.89 0.74
 5 -13 4 7.77 0.97
 -5 -13 -4 6.58 1.47
 5 13 -4 7.34 0.69
 5 -14 -4 0.09 0.45
 5 14 4 0.09 0.18
 5 14 4 -0.01 0.24
 5 14 4 0.08 0.28
 5 14 4 0.05 0.17
 -5 14 4 -0.17 0.23
 5 -14 4 0.09 0.38
 -5 -14 -4 0.01 0.45
 5 14 -4 -0.01 0.19
 5 14 -4 0.17 0.18
 5 -14 4 -0.01 0.6
 5 14 -4 0.19 0.2
 5 -14 4 0.28 0.23
 5 14 -4 0.38 0.23
 5 15 4 3.16 0.36
 5 -15 -4 3.02 0.84
 5 15 4 2.98 0.36
 -5 -15 4 2.04 0.71
 5 15 4 2.42 0.5
 5 15 -4 3.99 0.47
 -5 15 4 3.25 0.5
 5 15 -4 3.09 0.36
 -5 -15 -4 1.55 0.69
 5 -15 4 3.14 0.46
 5 -15 4 1.95 0.9
 5 15 -4 2.34 0.39
 5 15 -4 3.01 0.36
 5 -15 4 3.43 0.7
 5 16 4 0.2 0.3
 -5 -16 4 0.37 0.52
 5 -16 -4 0.71 0.62
 5 16 4 0.43 0.2
 5 -16 -4 0.33 0.55
 5 16 4 0.38 0.19
 5 16 -4 0.19 0.25
 -5 16 4 0.67 0.32
 5 16 -4 0.66 0.21
 5 -16 4 0.54 0.47
 5 16 -4 0.58 0.2
 5 -16 4 -0.12 0.57
 5 16 -4 0.21 0.22
 -5 -17 4 10.87 1.98
 5 -17 -4 12.8 2
 5 17 4 9.63 0.95
 5 17 4 10.24 0.73
 5 -17 -4 8.93 1.35
 5 17 4 11.03 0.74
 -5 17 4 8.77 0.91
 5 -17 4 9.95 1.21
 5 -17 4 11.17 2.12
 5 17 -4 10.19 0.72
 5 17 -4 7.93 0.84
 5 17 -4 10.89 0.74
 5 17 -4 9.73 0.81
 5 -18 -4 7.45 1.65
 5 18 4 7.45 0.59
 -5 -18 4 9.21 1.72
 5 18 4 6.5 0.57
 5 18 -4 6.83 0.65
 5 18 -4 7.85 0.61
 5 -18 4 5.93 1.79
 5 18 -4 7.44 0.59
 -5 -19 4 6.14 1.51
 5 19 4 5.53 0.51
 5 19 4 6.61 0.53
 5 19 -4 5.93 0.51
 5 -19 4 6.03 1.61
 5 19 -4 5.72 0.51
 5 20 4 1.48 0.24
 5 20 4 1.28 0.23
 -5 -20 4 0.65 0.52
 5 20 -4 0.62 0.21
 5 20 -4 1.1 0.24
 5 -20 4 0.48 0.54
 5 21 4 0.1 0.18
 -5 -21 4 0.09 0.39
 5 21 4 0.14 0.18
 5 21 -4 0.1 0.17
 5 -21 4 -0.07 0.41
 5 21 -4 0.13 0.17
 5 22 4 0.27 0.16
 5 22 4 0.2 0.17
 5 22 -4 0.61 0.18
 5 22 -4 0.42 0.18
 5 23 4 0.6 0.15
 5 23 4 0.4 0.16
 5 23 -4 0.66 0.17
 5 23 -4 0.35 0.14
 6 0 -4 0.93 0.15
 -6 0 -4 1.41 0.18
 6 0 4 1.41 0.15
 6 0 4 1.48 0.16
 -6 1 -4 93.42 5.43
 6 1 4 100.59 6.72
 6 1 4 94.06 5.43
 6 -1 -4 80.97 5.42
 6 1 4 89.09 5.63
 6 1 -4 85.03 5.41
 -6 -1 -4 88.7 5.43
 6 -1 4 86.1 5.64
 6 -1 4 91.3 5.42
 6 2 4 2 0.26
 6 2 4 1.63 0.18
 6 2 4 1.7 0.2
 -6 2 -4 1.51 0.2
 6 2 -4 1.76 0.17
 6 -2 4 1.8 0.21
 -6 -2 -4 1.53 0.21
 6 -2 4 1.79 0.18
 6 -2 4 1.79 0.3
 6 3 4 93.69 5.53
 6 3 4 84.15 6.4
 6 -3 -4 89.05 6.43
 6 3 -4 86.56 5.14
 6 3 -4 88.65 5.52
 6 -3 4 83.32 5.15
 6 -3 4 84.47 6.43
 6 -3 4 79.39 5.37
 -6 -3 -4 78.46 5.16
 6 4 4 49.02 4.02
 -6 -4 4 52.63 3.21
 6 -4 -4 61.53 4.1
 6 4 4 58.82 3.49
 6 4 -4 53.77 3.22
 6 -4 4 50.14 3.22
 6 4 -4 52.15 3.47
 6 -4 4 49.17 3.37
 6 -4 4 52.13 4.05
 -6 -5 4 23.15 1.48
 6 5 4 27.75 1.68
 6 -5 -4 26.46 2.01
 6 5 4 22.51 1.89
 6 -5 4 24.85 1.94
 6 -5 4 23.61 1.59
 6 -5 4 23.08 1.5
 6 5 -4 23.23 1.63
 -6 -6 4 6.6 0.46
 6 6 4 7.2 0.64
 6 6 4 6.62 0.64
 6 -6 4 7.33 0.74
 6 -6 4 6.32 0.54
 6 -6 4 7.13 0.49
 6 6 -4 6.95 0.56
 6 7 4 192.68 12.85
 6 7 4 201.85 14.82
 6 -7 4 207.95 11.93
 -6 7 4 196.27 14.77
 6 -7 4 192.73 14.91
 6 7 -4 195.31 12.8
 6 -7 4 201.04 12.47
 6 8 4 20.3 1.57
 6 8 4 18.26 1.44
 6 -8 4 20.58 1.33
 6 -8 4 19.55 1.23
 -6 8 4 17.62 1.5
 6 8 -4 18.3 1.35
 6 -8 4 19.55 1.68
 6 9 4 0.99 0.27
 6 9 4 0.77 0.32
 6 -9 4 1.23 0.24
 6 -9 4 1.33 0.41
 6 9 -4 0.91 0.24
 -6 9 4 1.1 0.23
 6 10 4 0.56 0.26
 6 10 4 0.4 0.23
 6 10 4 0.41 0.3
 6 10 -4 0.07 0.18
 -6 10 4 0.29 0.26
 6 -10 4 0.56 0.21
 6 -10 4 0.07 0.7
 6 -10 4 0.33 0.34
 6 -11 -4 122.07 14.4
 6 11 4 119.39 8.13
 6 11 4 111.73 8.3
 6 11 4 131.81 9.33
 6 11 -4 121.97 8.05
 6 -11 4 127.65 9.46
 -6 11 4 118.36 8.07
 6 -11 4 134.57 7.87
 6 12 4 21.41 1.67
 6 12 4 21.78 1.81
 6 12 4 18.53 1.6
 6 -12 -4 22.25 3.05
 6 12 -4 21.12 1.57
 -6 12 4 21.63 1.6
 6 -12 4 24.3 1.98
 6 -12 4 23.71 1.55
 6 13 4 2.41 0.5
 6 -13 -4 0.83 0.65
 6 13 4 1.57 0.37
 6 -13 -4 1.45 0.65
 6 13 4 2.89 0.31
 6 13 4 2.57 0.44
 6 13 -4 2.46 0.31
 6 13 -4 2.41 0.4
 6 -13 4 0.4 0.78
 6 -13 4 2.33 0.6
 -6 13 4 2.73 0.46
 6 -13 4 2.62 0.39
 6 14 4 1.17 0.26
 6 14 4 1.79 0.44
 6 14 4 1.4 0.24
 6 -14 -4 1.23 0.64
 6 14 4 1.46 0.25
 6 -14 -4 1.3 0.76
 -6 -14 4 1.61 0.32
 6 14 -4 1.2 0.27
 -6 -14 -4 0.51 0.53
 -6 -14 -4 1.32 0.31
 6 14 -4 1.18 0.23
 6 -14 4 1.37 0.52
 -6 14 4 1.27 0.35
 6 -14 4 2.43 0.39
 6 -14 4 0.4 0.71
 6 14 -4 1.34 0.32
 6 14 -4 0.81 0.22
 6 15 4 59.93 3.24
 6 -15 -4 59.94 6.96
 6 15 4 53.43 3.85
 6 15 4 53.49 3.25
 6 15 4 50.8 3.6
 6 -15 -4 55.39 4.69
 -6 -15 4 60.29 6.97
 6 -15 4 44.98 7.14
 6 15 -4 53.69 3.62
 6 -15 4 49.98 4.51
 6 -15 4 61.85 3.72
 6 15 -4 63.27 3.26
 -6 15 4 57.43 3.81
 6 15 -4 55.52 3.26
 6 15 -4 54.44 3.77
 -6 -16 4 7.49 1.57
 6 16 4 6.41 0.52
 6 16 4 7.17 0.54
 6 -16 -4 5.24 1.1
 6 -16 -4 5.81 1.58
 6 16 4 4.75 0.7
 6 16 -4 6.9 0.6
 6 -16 4 3 1.21
 6 16 -4 5.02 0.6
 6 16 -4 6.53 0.52
 -6 16 4 5.97 0.69
 6 -16 4 6.06 0.94
 6 16 -4 7.03 0.53
 6 17 4 0.61 0.21
 6 -17 -4 0.26 0.61
 6 17 4 0.57 0.21
 6 -17 -4 -0.2 0.47
 6 17 4 0.03 0.31
 -6 -17 4 0.26 0.5
 6 17 -4 -0.2 0.24
 6 -17 4 0.62 0.52
 -6 17 4 0.18 0.32
 6 -17 4 0.54 0.72
 6 17 -4 0.77 0.23
 6 17 -4 0.72 0.21
 6 17 -4 0.32 0.23
 6 18 4 11.39 0.78
 6 18 4 10.82 0.78
 6 -18 -4 11.62 1.98
 -6 -18 4 13.61 2.13
 6 18 -4 11.03 0.79
 6 -18 4 10.98 2.27
 6 18 -4 9.13 0.85
 6 18 -4 11.18 0.77
 6 19 4 42.78 2.59
 6 -19 -4 41.54 5.49
 -6 -19 4 49.04 5.72
 6 19 4 46.57 2.6
 6 -19 4 44.57 5.7
 6 19 -4 41.42 2.89
 6 19 -4 44.34 2.6
 6 19 -4 43.33 2.59
 6 20 4 7.58 0.57
 -6 -20 4 8.45 1.57
 6 20 4 7.08 0.55
 6 -20 4 5.33 1.56
 6 20 -4 6.93 0.56
 6 20 -4 6.71 0.55
 -6 -21 4 0.01 0.41
 6 21 4 0.27 0.18
 6 21 4 0.4 0.18
 6 -21 4 0.03 0.39
 6 21 -4 0.45 0.17
 6 21 -4 0.64 0.19
 6 22 4 3.64 0.37
 6 22 4 5.59 0.4
 6 22 -4 3.82 0.38
 6 22 -4 4.21 0.37
 6 23 4 27.75 1.49
 6 23 4 22.27 1.48
 6 23 -4 24.2 1.48
 6 23 -4 25.9 1.48
 7 0 4 46.39 3.09
 -7 0 -4 51.93 3.01
 7 0 4 52.06 2.99
 7 0 -4 46.22 2.98
 7 1 4 28.77 1.88
 7 -1 -4 30.34 2.27
 7 1 4 32.48 1.84
 7 -1 -4 27.5 1.83
 -7 1 -4 30.72 1.84
 -7 -1 -4 29.92 1.84
 7 -1 4 29.29 1.89
 7 -1 4 30.04 1.83
 7 1 -4 28.18 1.82
 7 2 4 9.63 0.65
 7 2 4 10.14 0.63
 7 2 4 10.01 0.77
 7 -2 -4 9.3 0.78
 7 -2 -4 8.51 0.62
 7 -2 4 8.55 0.63
 7 -2 4 9.31 0.81
 7 -2 4 8.95 0.61
 7 2 -4 8.68 0.6
 7 3 4 11.48 0.77
 7 3 4 10.83 0.9
 7 -3 -4 12.03 0.93
 7 -3 4 9.81 0.74
 7 -3 4 11.55 0.94
 7 3 -4 10.56 0.7
 7 -3 4 9.9 0.71
 7 4 4 10.62 0.68
 7 -4 -4 9.41 0.84
 7 4 4 8.4 0.78
 -7 -4 4 8.76 0.58
 7 -4 4 7.81 0.8
 7 4 -4 9.14 0.59
 7 -4 4 8.57 0.6
 7 -4 4 8.69 0.65
 7 4 -4 8.74 0.66
 7 5 4 0.68 0.19
 7 5 4 0.74 0.22
 -7 -5 4 0.51 0.1
 7 -5 -4 0.98 0.31
 7 -5 4 0.74 0.25
 7 -5 4 0.69 0.16
 7 -5 4 0.46 0.12
 7 5 -4 0.56 0.17
 7 6 4 0.82 0.24
 7 6 4 0.83 0.24
 7 -6 -4 0.67 0.36
 7 -6 4 0.6 0.27
 7 -6 4 0.38 0.17
 7 6 -4 0.67 0.19
 7 -6 4 0.38 0.12
 7 7 4 0.34 0.21
 7 -7 -4 0.11 0.38
 7 7 4 0.68 0.25
 7 7 -4 0.13 0.17
 7 -7 4 0.52 0.31
 7 -7 4 0.34 0.17
 7 8 4 4.5 0.59
 7 -8 -4 3.94 0.78
 7 8 4 4.13 0.52
 7 -8 4 4.7 0.44
 -7 8 4 4.14 0.46
 7 -8 4 4.83 0.67
 7 8 -4 4.05 0.45
 7 9 4 3.33 0.53
 7 9 4 2.76 0.4
 7 -9 -4 2.85 0.78
 7 9 4 3.13 0.45
 7 9 -4 3.12 0.4
 7 -9 4 1.99 0.83
 7 -9 4 3.85 0.64
 7 -9 4 3.43 0.39
 7 10 4 2.19 0.4
 7 -10 -4 1.97 0.73
 7 -10 -4 4.81 1.13
 7 10 4 1.3 0.34
 7 10 4 1.88 0.44
 7 -10 4 2.35 0.34
 7 10 -4 1.52 0.32
 7 -10 4 2.16 0.52
 7 -10 4 0.77 0.81
 7 -11 -4 0.22 0.41
 7 11 4 0.25 0.28
 7 11 4 0.25 0.25
 7 11 4 -0.07 0.32
 7 -11 -4 0.1 0.59
 7 -11 4 -0.1 0.76
 7 11 -4 -0.04 0.2
 7 -11 4 0.39 0.21
 7 -11 4 -0.08 0.36
 -7 11 4 0 0.23
 7 12 4 0.53 0.31
 7 12 4 0.75 0.29
 7 -12 -4 0.26 0.43
 7 12 4 0.3 0.35
 7 -12 -4 0.69 0.7
 -7 12 4 0.15 0.28
 7 12 -4 0.18 0.22
 7 -12 4 0.2 0.41
 7 -12 4 -0.13 0.69
 7 -12 4 0.02 0.21
 7 13 4 0.53 0.38
 7 13 4 0.59 0.32
 -7 -13 4 0.42 0.27
 7 13 4 0.39 0.19
 7 13 4 0.49 0.19
 7 -13 -4 0.53 0.52
 7 -13 -4 -0.1 0.64
 -7 -13 -4 0.3 0.25
 7 -13 4 0.73 0.49
 7 13 -4 0.6 0.2
 7 13 -4 0.81 0.27
 7 -13 4 0.36 0.23
 -7 13 4 0.24 0.28
 7 13 -4 0.76 0.21
 7 -13 4 0.01 0.78
 7 14 4 0.13 0.19
 7 14 4 0.11 0.18
 7 14 4 0.06 0.19
 7 14 4 0.37 0.33
 -7 -14 4 -0.07 0.26
 7 -14 -4 -0.16 0.48
 7 -14 -4 0.42 0.7
 7 14 4 -0.12 0.28
 7 14 -4 0.41 0.21
 7 14 -4 0.2 0.25
 7 14 -4 0.43 0.2
 7 14 -4 0.22 0.18
 -7 -14 -4 0.26 0.26
 7 -14 4 0.42 0.8
 7 -14 4 0.72 0.49
 -7 14 4 -0.02 0.26
 7 -14 4 0.12 0.24
 7 -15 -4 5.7 1.58
 -7 -15 4 4.75 0.54
 7 15 4 4.82 0.52
 7 15 4 6.06 0.73
 7 15 4 5.16 0.46
 7 15 4 5.05 0.47
 7 -15 -4 4.98 1.06
 7 -15 4 2.05 1.14
 -7 15 4 5.69 0.65
 7 15 -4 5.3 0.47
 7 15 -4 5.19 0.47
 7 15 -4 6.09 0.59
 -7 -15 -4 5.05 0.53
 7 -15 4 5.33 0.9
 7 15 -4 4.72 0.53
 7 -16 -4 0.7 0.68
 7 -16 -4 0.37 0.54
 -7 -16 4 0.26 0.53
 7 16 4 0.73 0.38
 7 16 4 0.5 0.21
 7 16 4 0.65 0.25
 7 16 4 0.42 0.21
 7 16 -4 0.56 0.22
 7 16 -4 0.41 0.23
 7 -16 4 0 0.48
 7 16 -4 0.32 0.28
 7 16 -4 0.39 0.2
 7 -16 4 -0.04 0.72
 -7 16 4 0.65 0.33
 7 17 4 5.2 0.7
 7 -17 -4 6.25 1.55
 -7 -17 4 6.48 1.53
 7 -17 -4 3.13 0.89
 7 17 4 5.89 0.5
 7 17 4 5.65 0.5
 7 17 -4 4.85 0.59
 -7 17 4 4.39 0.66
 7 17 -4 5.44 0.5
 7 17 -4 5.86 0.56
 7 -17 4 4.81 0.89
 7 -17 4 3.2 1.15
 7 17 -4 6.29 0.49
 7 -18 -4 2.07 0.69
 -7 -18 4 1.01 0.63
 7 18 4 2.03 0.28
 7 18 4 1.46 0.27
 7 18 -4 1.89 0.32
 7 -18 4 1.44 0.81
 7 18 -4 2.13 0.33
 7 18 -4 2.52 0.35
 -7 -19 4 0.77 0.55
 7 -19 -4 0.48 0.49
 7 19 4 1.18 0.25
 7 19 4 1.03 0.23
 7 19 -4 1.14 0.23
 7 19 -4 0.8 0.21
 7 -19 4 -0.21 0.58
 7 19 -4 1.11 0.29
 -7 -20 4 0.2 0.46
 7 20 4 0.26 0.18
 7 20 4 0.55 0.19
 7 20 -4 0.39 0.18
 7 -20 4 0.09 0.45
 7 20 -4 0.32 0.24
 7 20 -4 0.19 0.18
 7 21 4 0.25 0.17
 7 21 4 0.45 0.17
 -7 -21 4 0.28 0.45
 7 21 -4 0.45 0.17
 7 21 -4 0.29 0.17
 7 -21 4 0.31 0.45
 7 22 4 0.27 0.15
 7 22 4 0.42 0.16
 7 22 -4 0.55 0.15
 7 22 -4 0.29 0.16
 7 23 4 1.98 0.24
 7 23 4 1.48 0.23
 7 23 -4 1.1 0.19
 7 23 -4 1.6 0.22
 8 0 4 29.77 1.71
 8 0 -4 26.07 1.69
 8 0 4 26.4 1.74
 8 1 4 4.28 0.32
 8 1 4 4.69 0.34
 8 -1 -4 4.36 0.43
 8 -1 -4 4.05 0.34
 8 -1 4 4.06 0.34
 8 1 -4 4.38 0.33
 8 -1 4 4.43 0.34
 8 2 4 4.77 0.36
 8 -2 -4 4.92 0.47
 8 -2 -4 3.87 0.35
 8 2 4 4.61 0.35
 8 -2 4 4.08 0.34
 8 -2 4 4.2 0.35
 8 2 -4 3.99 0.33
 8 -2 4 4.98 0.5
 8 -3 -4 6.02 0.56
 8 -3 -4 5.16 0.42
 8 3 4 6.03 0.44
 8 -3 4 4.74 0.56
 8 -3 4 5.16 0.4
 8 -3 4 5.09 0.43
 8 3 -4 5.64 0.4
 8 4 4 55.32 3.26
 8 -4 -4 53.45 3.82
 8 -4 4 44.93 3.02
 8 -4 4 46.52 3.16
 8 4 -4 47.49 3.01
 8 -4 4 49.74 3.81
 8 5 4 7.88 0.59
 8 -5 -4 7.26 0.76
 8 5 4 6.27 0.65
 -8 -5 4 6.31 0.46
 8 -5 4 6.09 0.53
 8 -5 4 6.66 0.71
 8 5 -4 6.84 0.56
 8 6 4 1.7 0.31
 8 -6 -4 1.67 0.43
 8 6 4 1.8 0.31
 8 -6 4 1.54 0.26
 8 -6 4 1.35 0.34
 8 6 -4 1.32 0.25
 8 7 4 3.44 0.48
 8 7 4 2.97 0.43
 8 -7 -4 2.99 0.6
 8 -7 4 3.23 0.35
 8 7 -4 2.78 0.38
 8 -7 4 2.33 0.47
 8 8 4 42.22 2.84
 8 8 4 40.28 3.19
 8 8 4 37.32 2.8
 8 -8 -4 38.34 3.39
 8 -8 4 42 3.28
 8 -8 4 42.06 2.69
 8 -8 4 45.4 5.25
 8 8 -4 40.53 2.75
 8 9 4 3.06 0.46
 8 9 4 2.94 0.41
 8 9 4 2.63 0.49
 8 -9 -4 2.51 0.75
 8 -9 4 2.19 0.88
 8 -9 4 3.13 0.39
 8 -9 4 2.85 0.56
 8 9 -4 2.84 0.42
 8 -10 -4 4.07 0.99
 8 10 4 6.01 0.75
 8 10 4 6.06 0.69
 8 10 4 6.63 0.63
 8 -10 -4 8.11 1.43
 8 10 -4 5.96 0.61
 8 -10 4 6.71 0.6
 8 -10 4 7.06 1.95
 8 -10 4 5.98 0.86
 8 -11 -4 28.47 3.85
 8 11 4 27.37 2.19
 8 -11 -4 25.32 2.77
 8 11 4 29.07 2.13
 8 -11 4 33.32 2.05
 -8 11 4 29.37 2.1
 8 11 -4 29.73 2.08
 8 -11 4 31.37 2.56
 8 12 4 42.83 2.43
 8 -12 -4 37.23 5.21
 -8 -12 4 43.73 2.49
 8 12 4 38.42 2.93
 8 -12 -4 39.53 3.27
 8 12 4 38.48 2.96
 8 -12 -4 34.89 3.65
 8 12 -4 43.56 2.45
 -8 12 4 41.02 2.89
 8 -12 4 46.15 2.81
 -8 -12 -4 43.5 2.47
 8 12 -4 40.73 2.86
 8 -12 4 46.57 3.5
 8 -13 -4 2.69 0.8
 8 13 4 4.22 0.66
 -8 -13 4 3.96 0.47
 8 13 4 4.23 0.57
 8 -13 -4 4 1.03
 -8 -13 4 3.26 0.39
 8 13 4 3.7 0.39
 8 13 4 3.29 0.44
 8 13 4 3.74 0.38
 -8 -13 -4 3.07 0.42
 8 -13 4 1.22 1.03
 -8 -13 -4 3.85 0.45
 -8 13 4 3.91 0.55
 8 -13 4 3.77 0.48
 8 13 -4 3.54 0.39
 8 13 -4 3.53 0.4
 8 13 -4 3.81 0.49
 8 13 -4 3.77 0.45
 8 -13 4 4.31 0.8
 8 -14 -4 16.12 1.8
 8 14 4 13.53 1.05
 8 14 4 12.82 0.93
 8 14 4 15.24 0.96
 8 14 4 14.2 1.27
 8 -14 -4 14.81 2.38
 -8 -14 4 14.18 1.01
 8 14 -4 16.84 0.98
 -8 14 4 16.21 1.22
 -8 -14 -4 14.17 1
 8 -14 4 9.06 2.7
 8 14 -4 13.72 1.07
 8 14 -4 12.92 0.94
 8 14 -4 15.04 1.16
 8 -14 4 15.28 1.14
 -8 -14 -4 12.75 0.93
 8 -14 4 16.09 1.55
 8 15 4 17.51 1.58
 8 15 4 19.36 1.24
 8 -15 -4 21.37 2.98
 8 15 4 18.89 1.39
 8 15 4 20.72 1.25
 -8 -15 4 18.01 1.29
 8 -15 -4 16.69 2.03
 8 15 -4 19.45 1.24
 -8 -15 -4 20.55 1.29
 8 -15 4 21.27 1.95
 8 15 -4 18.64 1.48
 8 15 -4 19.66 1.41
 8 15 -4 20.6 1.26
 -8 15 4 20.51 1.54
 8 -16 -4 20.44 3.1
 8 -16 -4 16.97 2.11
 8 16 4 21.1 1.32
 8 16 4 16.92 1.62
 8 16 4 21.77 1.48
 -8 -16 4 23.11 3.15
 8 16 4 22.62 1.33
 8 16 -4 23.12 1.5
 8 -16 4 19.09 1.99
 -8 16 4 21.65 1.63
 8 16 -4 19.17 1.56
 8 16 -4 21.8 1.32
 8 16 -4 23.66 1.34
 -8 -16 -4 20.36 1.35
 8 -16 4 14.53 3.31
 8 17 4 0.14 0.21
 8 -17 -4 -0.14 0.48
 8 17 4 -0.09 0.22
 -8 -17 4 -0.16 0.49
 8 17 4 0.1 0.2
 8 -17 4 -0.49 0.64
 8 17 -4 0.02 0.19
 8 17 -4 0.03 0.22
 8 17 -4 0.19 0.19
 8 18 4 13.35 0.87
 -8 -18 4 15.18 2.3
 8 -18 -4 14.29 2.18
 8 18 4 11.82 0.86
 8 18 4 11.78 0.95
 8 -18 4 9.32 2.3
 8 18 -4 12.41 0.85
 8 18 -4 12.2 0.85
 8 18 -4 12.09 0.96
 8 19 4 11.47 0.82
 -8 -19 4 13.49 2.15
 8 -19 -4 12.42 2
 8 19 4 12.74 0.82
 8 19 -4 11.52 0.82
 8 19 -4 11.28 0.92
 8 -19 4 11.39 2.18
 8 19 -4 11.88 0.81
 -8 -20 4 15.89 2.33
 8 20 4 13.56 0.92
 8 20 4 15.03 0.92
 8 20 -4 13.79 0.93
 8 20 -4 14.49 1.05
 8 20 -4 14.09 0.91
 8 -20 4 11.17 2.23
 8 21 4 0.01 0.15
 8 21 4 0.16 0.16
 8 21 -4 0.17 0.22
 8 -21 4 0.52 0.47
 8 21 -4 0.31 0.15
 8 21 -4 0.36 0.17
 8 22 4 10.62 0.74
 8 22 4 12.67 0.73
 8 22 -4 11.74 0.73
 8 22 -4 10.5 0.74
 9 0 4 65.97 4.13
 9 0 -4 65.18 3.99
 9 -1 -4 2.67 0.27
 9 1 4 2.83 0.23
 9 1 -4 2.82 0.26
 9 -1 4 3.04 0.26
 9 -2 -4 1.48 0.27
 9 -2 4 0.76 0.15
 9 2 -4 1.31 0.18
 9 3 4 7.04 0.51
 9 -3 -4 7.01 0.65
 9 -3 4 6.56 0.66
 9 -3 4 6.32 0.5
 9 3 -4 6 0.47
 9 4 4 69.67 4.26
 9 -4 -4 70.61 4.98
 9 4 -4 62.67 3.96
 9 -4 4 63.14 4.97
 9 -4 4 59.67 4.13
 9 5 4 1.64 0.26
 9 -5 -4 1.81 0.38
 9 -5 4 1.77 0.35
 9 -5 4 1.17 0.22
 9 6 4 0.59 0.23
 9 -6 -4 0.8 0.36
 9 6 -4 0.48 0.2
 9 -6 4 0.86 0.32
 9 -6 4 0.62 0.19
 9 7 4 0.46 0.26
 9 7 4 0.71 0.24
 9 -7 -4 0.87 0.44
 9 -7 4 0.27 0.29
 9 7 -4 0.73 0.23
 9 -7 4 0.53 0.2
 9 -8 -4 17.76 2.06
 9 -8 -4 14.66 1.53
 9 8 4 13.97 1.17
 9 8 4 13.16 1.09
 9 -8 4 17.26 2.35
 9 -8 4 13.76 1.35
 9 -8 4 14.46 1.06
 9 8 -4 13.44 1.09
 9 -9 -4 -0.05 0.5
 9 9 4 0.61 0.36
 9 -9 -4 0.6 0.38
 9 9 4 0.51 0.27
 9 9 -4 0.51 0.23
 9 -9 4 1.08 0.42
 9 -9 4 0.39 0.63
 9 -9 4 0.19 0.2
 9 -10 -4 5.23 1.27
 9 10 4 2.69 0.45
 9 -10 -4 1.91 0.75
 9 10 4 2.59 0.53
 9 -10 4 2.89 0.4
 9 10 -4 2.79 0.42
 9 -10 4 3.62 0.68
 9 -10 4 2.02 0.89
 9 -11 -4 1.01 0.65
 9 11 4 0.61 0.4
 9 11 4 0.75 0.31
 9 -11 -4 0.43 0.44
 9 -11 -4 -0.23 0.62
 9 11 -4 0.48 0.27
 9 -11 4 0.51 0.25
 9 -11 4 0.31 0.45
 9 -11 4 -0.3 0.68
 9 12 4 14.32 1.23
 9 12 4 14.99 1.35
 9 -12 -4 15.5 2.42
 9 12 4 15.84 1.12
 -9 -12 4 16.07 1.06
 9 -12 -4 11.5 1.76
 9 -12 -4 16.98 1.7
 9 12 4 16.53 1
 9 12 -4 16.31 1
 -9 12 4 15.6 1.25
 -9 -12 -4 16.63 1.05
 9 12 -4 13.92 1.19
 -9 -12 -4 13.53 0.98
 9 12 -4 14.75 1.12
 9 -12 4 16.7 1.59
 9 12 -4 13.35 0.99
 9 -12 4 17.57 1.2
 9 13 4 6.6 0.85
 9 13 4 6.91 0.74
 9 13 4 5.86 0.6
 9 -13 -4 5.88 1.26
 -9 -13 4 5.7 0.54
 9 -13 -4 6.51 1.65
 9 13 4 7.64 0.56
 9 13 4 6.02 0.53
 -9 -13 4 7.1 0.63
 9 13 -4 7.3 0.56
 -9 -13 -4 6.55 0.55
 -9 -13 -4 6.61 0.6
 9 13 -4 6.16 0.54
 -9 13 4 6.63 0.73
 9 13 -4 6.7 0.63
 9 13 -4 6.59 0.67
 9 -13 4 6.84 1
 9 -13 4 7.08 0.67
 9 14 4 -0.27 0.2
 9 14 4 0.03 0.19
 9 -14 -4 -0.22 0.48
 9 14 4 0.14 0.21
 9 14 4 1.05 0.45
 -9 -14 4 0.17 0.29
 -9 -14 4 -0.23 0.24
 9 -14 -4 0.02 0.71
 9 14 -4 0 0.26
 9 14 -4 0.07 0.19
 9 14 -4 0.25 0.22
 9 -14 4 0.11 0.48
 9 -14 4 0.18 0.26
 -9 -14 -4 -0.18 0.26
 -9 -14 -4 -0.21 0.25
 9 14 -4 0.4 0.22
 9 -14 4 0.08 0.91
 -9 14 4 -0.08 0.3
 9 15 4 3.45 0.47
 9 15 4 3.77 0.42
 9 -15 -4 1.67 0.83
 9 15 4 3.82 0.68
 -9 -15 4 3.39 0.5
 9 -15 -4 2.02 0.85
 9 15 4 4.25 0.42
 9 15 -4 4.05 0.42
 9 15 -4 4.31 0.43
 -9 -15 -4 3.67 0.48
 9 -15 4 4 0.83
 9 15 -4 3.38 0.47
 9 -15 4 1.38 1.12
 9 15 -4 3.86 0.52
 -9 15 4 4.03 0.6
 9 16 4 10.87 0.75
 9 16 4 11.3 0.76
 9 -16 -4 9.93 1.52
 9 16 4 10.32 0.84
 -9 -16 4 9.86 0.81
 9 16 4 8.07 1
 9 -16 -4 10.04 2.02
 9 -16 4 8.92 1.23
 -9 -16 -4 8.46 0.78
 9 16 -4 10.73 0.74
 9 16 -4 10.86 0.85
 9 16 -4 7.98 0.87
 9 16 -4 11.32 0.76
 -9 16 4 11.04 0.99
 9 17 4 1.21 0.25
 9 17 4 1.16 0.28
 -9 -17 4 0.95 0.62
 9 -17 -4 1.17 0.64
 9 17 4 1.02 0.25
 -9 -17 -4 1.64 0.32
 9 -17 4 -0.16 0.71
 9 17 -4 0.85 0.24
 9 17 -4 1.44 0.26
 9 17 -4 1.18 0.29
 9 -18 -4 2.82 0.8
 9 18 4 3.26 0.41
 9 18 4 3.51 0.39
 -9 -18 4 1.55 0.74
 9 18 4 3.31 0.45
 9 18 -4 3.46 0.39
 9 18 -4 3.19 0.38
 9 -18 4 1.5 0.86
 9 18 -4 3.38 0.44
 9 19 4 1.07 0.27
 9 -19 -4 4.32 1.19
 9 19 4 0.96 0.21
 9 19 4 1.28 0.23
 -9 -19 4 0.8 0.57
 9 19 -4 0.7 0.2
 9 19 -4 0.93 0.28
 9 -19 4 0.03 0.61
 9 19 -4 1.08 0.23
 9 20 4 1.61 0.25
 -9 -20 4 1.05 0.61
 9 20 4 1.91 0.3
 9 20 -4 2.36 0.3
 9 20 -4 2.08 0.36
 9 -20 4 1 0.62
 9 20 -4 2.35 0.3
 9 21 4 3.96 0.37
 9 21 4 3.96 0.35
 9 21 -4 3.96 0.35
 9 21 -4 3.93 0.44
 9 21 -4 3.86 0.36
 9 22 4 0.8 0.17
 9 22 -4 0.87 0.16
 9 22 -4 0.99 0.15
 10 0 4 121.68 7.14
 10 -1 4 0.98 0.16
 10 -2 -4 6.62 0.61
 10 -2 4 5.92 0.47
 10 -3 -4 0.46 0.23
 10 -3 4 0.11 0.12
 10 -3 4 0.39 0.22
 10 4 4 91.39 5.58
 10 -4 -4 89.71 6.52
 10 -4 4 84.78 6.52
 10 -4 4 77.34 5.42
 10 -5 -4 1.1 0.31
 10 5 4 0.67 0.19
 10 -5 4 0.47 0.27
 10 -5 4 0.39 0.17
 10 -6 -4 4.34 0.64
 10 6 4 4.53 0.47
 10 6 4 3.14 0.43
 10 -6 4 3.7 0.57
 10 -6 4 5.9 1.11
 10 -6 4 3.66 0.41
 10 7 4 -0.41 0.21
 10 -7 -4 -0.01 0.37
 10 7 4 -0.23 0.22
 10 -7 4 0.1 0.34
 10 -7 4 -0.19 0.16
 10 7 -4 0.22 0.2
 10 -7 4 0.31 0.31
 10 -8 -4 43.79 3.43
 10 8 4 36.81 2.82
 10 8 4 44.32 2.86
 10 -8 -4 40.46 4.95
 10 8 -4 39.88 2.77
 10 -8 4 41.07 2.7
 10 -8 4 43.8 5.21
 10 -8 4 38.98 3.3
 10 9 4 0.88 0.3
 10 -9 -4 0.33 0.58
 10 -9 -4 3.4 1.04
 10 9 4 1.05 0.39
 10 -9 4 1.23 0.29
 10 -9 4 0.54 0.57
 10 9 -4 1.53 0.32
 10 -9 4 1.49 0.46
 10 -10 -4 5.22 1.08
 10 -10 -4 5.52 0.98
 10 10 4 5.04 0.59
 10 -10 -4 6.44 1.4
 10 10 4 5.28 0.72
 10 -10 4 2.76 1.06
 10 10 -4 4.88 0.56
 10 -10 4 5.6 0.81
 10 -10 4 5.95 0.57
 10 -11 -4 0.18 0.6
 10 -11 -4 0.3 0.43
 10 11 4 0.41 0.31
 10 -11 -4 0.57 0.81
 -10 -11 4 0.27 0.27
 10 11 4 0.37 0.42
 10 11 4 0.24 0.19
 10 11 -4 0.23 0.19
 10 -11 4 -0.16 0.22
 10 -11 4 0.16 0.43
 10 -11 4 0.09 0.68
 10 11 -4 -0.12 0.26
 -10 -11 -4 0.35 0.24
 10 -12 -4 21.85 1.95
 10 -12 -4 18.88 2.83
 10 12 4 21.26 1.2
 10 12 4 17.58 1.47
 -10 -12 4 19.16 1.19
 10 12 4 17.85 1.17
 -10 -12 4 20.84 1.27
 10 -12 -4 15.19 2.09
 10 12 4 17.54 1.33
 10 12 4 18.09 1.59
 -10 -12 -4 17.46 1.18
 10 12 -4 15.79 1.18
 -10 12 4 18.34 1.46
 10 12 -4 19 1.44
 10 -12 4 22.62 1.44
 10 12 -4 18.92 1.2
 10 12 -4 18.49 1.35
 10 -12 4 19.27 1.83
 -10 -12 -4 19.5 1.24
 10 13 4 0.16 0.21
 -10 -13 4 -0.06 0.24
 -10 -13 4 0.06 0.27
 10 -13 -4 0.93 0.92
 10 13 4 -0.09 0.41
 10 13 4 0.34 0.2
 10 -13 -4 0.02 0.48
 10 13 4 0.01 0.34
 10 13 4 0.14 0.22
 10 13 -4 0.45 0.21
 -10 -13 -4 -0.01 0.25
 10 13 -4 0.04 0.22
 -10 -13 -4 0.51 0.26
 -10 13 4 0.08 0.32
 10 13 -4 0.46 0.25
 10 -13 4 0.31 0.28
 10 13 -4 0.57 0.31
 10 -13 4 -0.1 0.84
 10 -13 4 0.23 0.52
 10 14 4 5.47 0.62
 10 14 4 5.83 0.84
 10 -14 -4 5.48 1.31
 10 14 4 5.76 0.54
 10 14 4 7.36 0.57
 -10 -14 4 5.56 0.54
 -10 -14 4 7.11 0.64
 10 -14 -4 6.48 1.66
 10 14 -4 6.47 0.54
 10 14 -4 6.66 0.7
 -10 -14 -4 6.34 0.61
 -10 -14 -4 6.19 0.56
 10 14 -4 6.91 0.55
 10 -14 4 6.76 1.02
 10 14 -4 5.62 0.62
 -10 14 4 7.32 0.8
 10 15 4 0.51 0.22
 -10 -15 4 -0.16 0.29
 10 -15 -4 0.48 0.88
 10 15 4 0.72 0.45
 10 -15 -4 0.08 0.51
 10 15 4 0.03 0.22
 10 15 4 0.38 0.21
 -10 -15 -4 -0.29 0.27
 -10 15 4 0.26 0.36
 10 15 -4 0.3 0.3
 10 15 -4 0.12 0.23
 -10 -15 -4 0.02 0.27
 10 -15 4 -0.21 0.51
 10 15 -4 0.12 0.22
 10 -15 4 -1.28 0.78
 10 15 -4 -0.02 0.2
 10 -16 -4 15.54 2.77
 -10 -16 4 18.39 1.24
 10 16 4 19.39 1.18
 10 16 4 19.48 1.33
 10 16 4 17.93 1.17
 10 16 -4 18.35 1.16
 10 16 -4 18.17 1.33
 -10 -16 -4 17.55 1.22
 10 -16 4 11.01 3.06
 10 16 -4 19.63 1.19
 10 -17 -4 -0.02 0.51
 -10 -17 4 0.01 0.48
 -10 -17 4 0.03 0.3
 10 17 4 0.22 0.21
 10 17 4 -0.35 0.18
 10 17 4 -0.02 0.23
 10 17 -4 -0.04 0.23
 10 -17 4 -1.01 0.61
 -10 -17 -4 0.01 0.28
 10 17 -4 -0.1 0.2
 10 17 -4 -0.19 0.2
 -10 -18 4 6.72 1.55
 10 18 4 5.8 0.49
 10 -18 -4 6.89 1.54
 10 18 4 5.82 0.5
 10 18 4 6 0.59
 10 -18 4 2.92 1.16
 10 18 -4 5.34 0.57
 10 18 -4 5.74 0.49
 10 18 -4 5.56 0.48
 10 19 4 -0.01 0.22
 10 19 4 0.47 0.18
 10 19 4 0.31 0.18
 -10 -19 4 0.27 0.52
 10 -19 4 -0.71 0.5
 10 19 -4 0.14 0.17
 10 19 -4 0.05 0.22
 10 19 -4 0.01 0.17
 -10 -20 4 10.91 1.89
 10 20 4 10.45 0.71
 10 20 4 10.86 0.69
 10 20 -4 10.51 0.82
 10 20 -4 9.94 0.71
 10 -20 4 7.7 1.83
 10 20 -4 10.82 0.69
 10 21 4 0.42 0.16
 10 21 -4 0.25 0.2
 10 21 -4 0.39 0.15
 10 22 4 4.93 0.38
 10 22 -4 5 0.38
 11 -3 -4 0.26 0.21
 11 3 4 0.07 0.18
 11 -3 4 -0.13 0.11
 11 4 4 10.62 0.88
 11 -4 -4 12.82 1.06
 11 -4 4 11.27 0.82
 11 -4 4 11.83 1.05
 11 5 4 9.71 0.69
 11 -5 -4 9.33 0.87
 11 5 4 7.39 0.69
 11 -5 4 8.38 0.85
 11 -5 4 7.81 0.65
 11 -6 -4 0.11 0.28
 11 6 4 0.13 0.22
 11 6 4 0.01 0.18
 11 -6 4 0.25 0.25
 11 -6 4 -0.03 0.17
 11 -6 4 0.31 0.3
 11 -7 -4 3.72 0.68
 11 7 4 2.43 0.4
 11 7 4 3.29 0.47
 11 -7 4 3.15 0.6
 11 -7 4 4.14 1.21
 11 -7 4 2.78 0.38
 11 -8 -4 18.67 1.66
 11 -8 -4 15.61 2.25
 11 8 4 15.08 1.22
 11 8 4 18.23 1.31
 11 8 -4 15.17 1.22
 11 -8 4 17.8 2.57
 11 -8 4 15.06 1.5
 11 -8 4 16.08 1.18
 11 -9 -4 0.16 0.49
 11 9 4 0.24 0.34
 11 9 4 -0.55 0.24
 11 -9 -4 0.17 0.38
 11 -9 -4 -0.74 0.52
 11 -9 4 0.43 0.53
 11 -9 4 0.62 0.42
 11 9 -4 0.21 0.25
 11 -9 4 -0.44 0.57
 11 -9 4 0.15 0.21
 11 -10 -4 0.5 0.45
 11 -10 -4 -0.34 0.66
 11 10 4 0.02 0.28
 11 -10 -4 0.89 0.57
 -11 -10 4 -0.03 0.23
 11 10 4 -0.74 0.34
 11 -10 4 0.17 0.47
 11 10 -4 0.13 0.26
 11 -10 4 0.68 0.63
 11 -10 4 0.08 0.23
 -11 -10 -4 -0.08 0.21
 11 -10 4 -0.48 0.56
 11 11 4 7.09 0.56
 11 11 4 6.88 0.91
 11 -11 -4 7.87 1.67
 11 11 4 7.95 0.74
 11 -11 -4 7.73 1.2
 -11 -11 4 7.24 0.65
 -11 -11 4 6.38 0.57
 11 11 4 7.35 0.65
 11 -11 -4 5.06 1.25
 -11 -11 -4 7.97 0.62
 11 11 -4 6.89 0.67
 11 11 -4 4.55 0.55
 11 -11 4 8.7 0.71
 11 11 -4 7.51 0.72
 11 -11 4 8.54 1.09
 -11 -11 -4 6.55 0.55
 11 11 -4 6.02 0.56
 11 12 4 8.25 0.76
 11 12 4 8 0.66
 -11 -12 4 9.49 0.69
 11 12 4 7.4 1.01
 11 -12 -4 5.96 1.47
 11 -12 -4 9.01 1.87
 11 12 4 9.84 0.89
 11 -12 -4 7.65 1.4
 11 12 4 9.6 0.67
 -11 -12 4 9.18 0.75
 -11 12 4 8.27 0.89
 11 12 -4 9.51 0.86
 11 12 -4 7.42 0.66
 -11 -12 -4 11 0.75
 -11 -12 -4 9.97 0.69
 11 -12 4 11.09 1.25
 11 -12 4 9.74 0.83
 11 12 -4 8.68 0.79
 11 12 -4 8.88 0.68
 11 13 4 0.45 0.54
 11 13 4 0.62 0.23
 11 13 4 0.26 0.23
 11 -13 -4 0.03 0.9
 -11 -13 4 0.14 0.26
 11 13 4 0.85 0.27
 11 -13 -4 -0.33 0.48
 -11 -13 4 0.16 0.27
 11 13 4 -0.1 0.36
 11 13 -4 0.08 0.28
 -11 -13 -4 0.71 0.27
 -11 -13 -4 0.76 0.29
 -11 13 4 0.61 0.39
 11 -13 4 -0.12 0.57
 11 13 -4 0.64 0.23
 11 13 -4 0.14 0.25
 11 13 -4 0.74 0.26
 11 -13 4 -1.11 0.85
 11 -14 -4 1.7 0.81
 11 14 4 4.05 0.44
 11 14 4 4.07 0.43
 -11 -14 4 3.25 0.52
 11 14 4 1.6 0.61
 11 14 4 3.88 0.49
 11 -14 -4 2.88 1.1
 -11 -14 4 3.07 0.45
 11 -14 4 3.88 0.86
 11 14 -4 4.27 0.5
 11 14 -4 3.67 0.41
 11 14 -4 3.85 0.43
 -11 -14 -4 2.7 0.39
 11 14 -4 3.67 0.53
 11 -14 4 0.37 1.13
 -11 14 4 3.54 0.6
 -11 -14 -4 3.09 0.48
 11 15 4 15.35 0.92
 11 -15 -4 9.17 1.76
 -11 -15 4 12.7 0.98
 11 -15 -4 11.97 2.35
 11 15 4 10.99 1.25
 11 15 4 14.29 1.04
 -11 -15 4 12.93 0.89
 11 15 4 12.98 0.9
 -11 -15 -4 13.76 0.97
 -11 -15 -4 12.29 0.91
 11 15 -4 13.67 0.91
 -11 15 4 14.08 1.2
 11 15 -4 13.45 1.03
 11 15 -4 13.28 0.91
 11 15 -4 10.62 1.07
 11 -15 4 13.81 1.54
 -11 -16 4 6.9 0.69
 11 -16 -4 6.85 1.83
 11 16 4 7.42 0.6
 11 16 4 6.53 0.6
 11 16 4 7.36 0.7
 11 16 -4 8.32 0.61
 11 16 -4 7.1 0.69
 -11 -16 -4 6.51 0.66
 11 16 -4 7.43 0.6
 -11 -17 4 -0.26 0.28
 11 17 4 0.15 0.22
 11 17 4 -0.06 0.24
 11 -17 -4 -0.19 0.53
 -11 -17 4 -0.01 0.54
 11 17 4 -0.04 0.19
 -11 -17 -4 -0.05 0.26
 11 17 -4 -0.13 0.18
 11 17 -4 -0.02 0.24
 11 17 -4 0.07 0.22
 11 -17 4 -0.41 0.73
 11 -18 -4 8.74 1.58
 11 18 4 5.72 0.5
 11 18 4 6.27 0.61
 -11 -18 4 6.83 1.6
 11 18 -4 6.33 0.61
 11 18 -4 5.96 0.51
 11 18 -4 5.6 0.51
 -11 -18 -4 5.63 0.57
 11 19 4 -0.06 0.24
 11 19 4 0.15 0.17
 -11 -19 4 0.38 0.52
 11 19 -4 -0.13 0.16
 11 19 -4 0.05 0.2
 11 19 -4 -0.03 0.17
 11 -19 4 -0.45 0.52
 11 20 4 1.81 0.29
 11 20 4 2.56 0.41
 11 20 -4 2.11 0.29
 11 20 -4 2.38 0.37
 11 21 4 0.47 0.15
 11 21 -4 -0.05 0.13
 11 21 -4 0.07 0.18
 12 0 4 26 1.82
 12 1 4 21.3 1.44
 12 -1 4 18.89 1.43
 12 2 4 0.98 0.22
 12 -2 4 0.99 0.21
 12 -2 4 3.06 0.83
 12 -3 -4 32.26 2.41
 12 -3 -4 26.67 3.77
 12 3 4 27.82 2.11
 12 -3 4 34.74 3.69
 12 -4 -4 21.34 2.79
 12 -4 -4 21.52 1.76
 12 4 4 19.3 1.52
 12 -4 4 24.01 2.72
 12 -5 -4 1.69 0.38
 12 5 4 1.16 0.27
 12 -5 4 1.11 0.22
 12 -5 4 1.19 0.36
 12 6 4 0.55 0.22
 12 6 4 0.52 0.24
 12 -6 -4 0.3 0.32
 12 -6 4 -0.04 0.16
 12 -6 4 -0.12 0.26
 12 -6 4 0.35 0.32
 12 7 4 10.16 0.92
 12 -7 -4 12.71 1.75
 12 7 4 13.36 0.98
 12 -7 -4 12.74 1.24
 12 -7 4 10.75 2
 12 -7 4 11.91 1.17
 12 -7 4 10.79 0.88
 12 8 4 16.19 1.24
 12 8 4 14.69 1.15
 12 -8 -4 17.83 1.59
 12 -8 -4 13.7 2.12
 12 -8 -4 13.83 1.37
 12 -8 4 14.53 2.45
 12 -8 4 15.46 1.11
 12 -8 4 12.06 1.44
 12 -8 4 14.52 1.45
 12 9 4 1.82 0.37
 12 -9 -4 1.91 0.61
 12 -9 -4 2.55 0.73
 12 -9 -4 1.62 0.55
 -12 -9 4 1.96 0.33
 12 9 4 2.26 0.51
 -12 -9 -4 1.96 0.32
 12 -9 4 2.23 0.6
 12 -9 4 2.2 0.36
 12 -9 4 3 0.72
 12 9 -4 1.93 0.64
 12 -9 4 1.44 0.73
 12 10 4 0.41 0.4
 12 10 4 0.3 0.24
 -12 -10 4 0.29 0.23
 12 -10 -4 -0.1 0.57
 12 10 4 -0.34 0.29
 12 -10 -4 0 0.41
 -12 -10 4 0.32 0.26
 12 -10 -4 -0.56 0.65
 12 -10 -4 0.62 0.34
 12 -10 4 -0.2 0.22
 12 10 -4 0.04 0.2
 12 -10 4 0.07 0.46
 -12 -10 -4 0.35 0.24
 12 -10 4 -0.39 0.6
 12 -10 4 0.62 0.64
 12 10 -4 0.58 0.63
 12 10 -4 0.38 0.28
 -12 -10 -4 -0.1 0.21
 12 11 4 9.44 0.8
 -12 -11 4 9.41 0.71
 12 -11 -4 9.85 1.31
 12 -11 -4 8.26 1.93
 -12 -11 4 9.49 0.78
 12 -11 -4 6.35 1.41
 12 11 4 9.2 0.88
 12 11 4 9.63 0.69
 12 11 4 9.64 1.08
 12 -11 -4 11.3 0.92
 -12 -11 -4 10.55 0.71
 -12 -11 -4 11.22 0.78
 12 -11 4 10.22 1.23
 12 11 -4 8.74 0.82
 12 11 -4 9.47 0.89
 12 -11 4 10.91 0.86
 12 11 -4 8.95 0.71
 12 -11 4 5.37 1.66
 12 12 4 13.53 1.51
 12 12 4 18.15 1.39
 12 -12 -4 14.18 2.73
 -12 -12 4 18.65 1.21
 12 -12 -4 16.68 1.82
 -12 -12 4 17.59 1.12
 12 12 4 17.53 1.1
 12 12 4 16.25 1.26
 12 -12 -4 20.52 1.42
 12 12 -4 14.85 1.34
 -12 -12 -4 16.43 1.11
 -12 12 4 17.72 1.42
 -12 -12 -4 17.79 1.17
 12 -12 4 17.46 1.77
 12 12 -4 16.56 1.12
 12 12 -4 16.99 1.29
 12 -12 4 16.85 1.31
 12 13 4 3.15 0.42
 12 13 4 2.11 0.63
 -12 -13 4 4.35 0.53
 12 13 4 4.62 0.51
 -12 -13 4 3.26 0.47
 12 -13 -4 1.86 1.11
 12 13 -4 3.73 0.43
 12 13 -4 3.8 0.53
 -12 -13 -4 3.03 0.44
 12 13 -4 3.33 0.55
 -12 -13 -4 2.33 0.41
 12 -13 4 3.67 0.85
 -12 13 4 2.34 0.55
 12 14 4 0.32 0.22
 -12 -14 4 0.39 0.27
 12 -14 -4 -0.42 0.57
 12 14 4 0.85 0.55
 -12 -14 4 0.49 0.3
 12 14 4 0.51 0.25
 12 -14 -4 0.59 0.94
 -12 -14 -4 0.86 0.31
 12 14 -4 0.31 0.34
 12 14 -4 0.28 0.22
 12 14 -4 0.26 0.28
 12 -14 4 0.4 0.65
 12 -14 4 -0.95 0.74
 -12 -14 -4 0.56 0.29
 12 15 4 4.41 0.54
 -12 -15 4 4.05 0.47
 12 15 4 4.39 0.45
 12 -15 -4 2.54 0.94
 -12 -15 4 3.87 0.54
 -12 -15 -4 4.14 0.53
 12 15 -4 3.99 0.52
 -12 -15 -4 3.41 0.51
 12 15 -4 4.57 0.46
 12 16 4 10.7 0.86
 12 16 4 9.94 0.72
 12 -16 -4 7.76 2.04
 -12 -16 4 10.27 0.82
 -12 -16 -4 8.39 0.74
 12 16 -4 9.29 0.72
 12 16 -4 10.7 0.85
 -12 -16 -4 9.45 0.79
 -12 -17 4 1.05 0.63
 12 17 4 2.71 0.43
 -12 -17 4 0.81 0.32
 12 -17 -4 1.38 0.63
 12 17 4 1.59 0.25
 12 17 -4 1.42 0.25
 -12 -17 -4 0.94 0.3
 12 17 -4 1.64 0.34
 -12 -18 4 6.93 1.53
 12 18 4 5.2 0.55
 -12 -18 4 4.48 0.53
 12 18 4 5.07 0.44
 12 -18 -4 9.24 1.44
 12 18 -4 5 0.45
 12 18 -4 5.57 0.55
 12 -18 4 2.19 1.06
 -12 -18 -4 4.1 0.5
 -12 -19 4 7.01 1.54
 12 19 4 6.29 0.48
 12 19 4 6.94 0.6
 12 19 -4 5.18 0.46
 12 -19 4 3.59 1.1
 12 19 -4 6.38 0.58
 12 20 4 2.06 0.27
 12 20 4 2.48 0.4
 12 20 -4 2.13 0.27
 12 20 -4 2.48 0.36
 12 21 -4 -0.14 0.17
 12 21 -4 0.06 0.12
 13 0 4 0.15 0.18
 13 1 4 0.28 0.21
 13 -1 4 0.59 0.19
 13 1 -4 -0.14 0.17
 13 2 4 0.42 0.21
 13 -2 4 0.17 0.39
 13 -2 4 0.11 0.17
 13 2 -4 -0.1 0.19
 13 -3 -4 0.01 0.55
 13 3 4 1.33 0.24
 13 3 -4 1.14 0.24
 13 -3 4 1.26 0.24
 13 -3 4 3.99 1.07
 13 -4 -4 5.98 0.66
 13 -4 -4 5.42 1.6
 13 4 4 5.93 0.56
 13 5 4 6.09 0.61
 13 -5 -4 6 1.56
 13 -5 -4 6.76 0.76
 13 -5 4 7.99 1.3
 13 -6 -4 1.93 0.46
 13 -6 -4 1.93 0.5
 13 -6 -4 0.74 0.41
 13 6 4 1.24 0.29
 13 -6 4 1.54 0.55
 13 -6 4 1.7 0.43
 13 -6 4 0.9 0.42
 13 -7 -4 13.1 2.06
 13 7 4 13.34 1.05
 13 -7 -4 15.76 1.38
 13 -7 -4 11.54 1.26
 13 -7 4 11.07 1.33
 13 -7 4 14.51 2.2
 13 -7 4 13.04 1
 13 -7 4 13.5 1.31
 13 7 -4 12.87 1.3
 13 -8 -4 0.21 0.48
 13 -8 -4 -0.35 0.46
 13 8 4 0.43 0.31
 -13 -8 4 0.01 0.25
 13 -8 -4 0.03 0.35
 13 8 4 0.28 0.28
 13 -8 4 0.11 0.22
 13 -8 4 -0.13 0.46
 13 8 -4 0.23 0.51
 -13 -8 -4 0.13 0.23
 13 -8 4 0.57 0.43
 13 -8 4 0.8 0.58
 13 -9 -4 15.53 1.63
 13 9 4 15.39 1.24
 13 9 4 11.99 1.04
 13 -9 -4 14.63 1.4
 -13 -9 4 13.49 0.94
 13 9 4 15.19 1.13
 13 -9 -4 12.44 2.16
 -13 -9 4 14.07 1
 13 -9 4 15.02 1.46
 13 9 -4 13.61 1.46
 13 9 -4 12.1 1.07
 13 -9 4 14.26 1.08
 -13 -9 -4 15.25 0.98
 13 -9 4 14.03 1.49
 13 -9 4 12.6 2.58
 -13 -9 -4 13.04 0.92
 -13 -10 4 0.15 0.26
 13 -10 -4 -0.05 0.7
 13 -10 -4 -0.15 0.44
 13 10 4 0.14 0.23
 13 10 4 0.39 0.31
 -13 -10 4 0.32 0.26
 13 10 4 -0.08 0.42
 13 -10 -4 0.84 0.65
 -13 -10 -4 0.15 0.24
 13 -10 4 0.32 0.26
 13 -10 4 -0.34 0.68
 13 -10 4 0.78 0.49
 13 -10 4 0.35 0.72
 -13 -10 -4 0.17 0.25
 13 10 -4 0.85 0.32
 -13 -11 4 17.89 1.21
 -13 -11 4 17.22 1.13
 13 -11 -4 12.17 1.99
 13 -11 -4 17.15 1.76
 13 11 4 17.44 1.28
 13 11 4 17.73 1.56
 13 -11 -4 13.27 2.6
 13 11 4 19.37 1.39
 13 -11 4 15.91 1.78
 13 -11 4 18.72 1.33
 -13 -11 -4 18.04 1.12
 -13 -11 -4 19.74 1.19
 13 -11 4 10.62 3.13
 13 11 -4 15.58 1.29
 13 -12 -4 -0.74 0.89
 13 -12 -4 -0.12 0.78
 -13 -12 4 -0.1 0.28
 13 12 4 0.2 0.53
 -13 -12 4 -0.03 0.27
 13 12 4 0.39 0.36
 13 -12 -4 -0.52 0.51
 13 12 4 0.22 0.25
 13 -12 4 -1.55 0.8
 13 12 -4 0.39 0.28
 -13 -12 -4 0.72 0.27
 13 12 -4 0.04 0.23
 13 -12 4 0.61 0.64
 -13 12 4 0.21 0.4
 -13 -12 -4 0.61 0.28
 13 13 4 1.32 0.59
 -13 -13 4 2.1 0.35
 13 13 4 2.88 0.47
 13 13 4 1.73 0.31
 -13 -13 4 1.94 0.38
 13 -13 -4 0 0.67
 13 -13 -4 0.27 1.04
 13 13 -4 2.04 0.32
 -13 -13 -4 2.1 0.33
 13 13 -4 3.03 0.48
 -13 -13 -4 1.77 0.36
 13 -13 4 1.8 0.75
 13 14 4 0.81 0.31
 -13 -14 4 0.82 0.34
 13 14 4 1.05 0.26
 13 -14 -4 -0.28 0.6
 -13 -14 4 1.22 0.3
 -13 -14 -4 0.8 0.31
 13 14 -4 0.68 0.26
 -13 -14 -4 1.22 0.34
 13 14 -4 1.27 0.34
 13 -14 4 -1.69 0.81
 -13 -15 4 8.06 0.64
 13 15 4 6.54 0.6
 -13 -15 4 7.43 0.73
 13 15 4 8.17 0.75
 13 15 -4 8.17 0.75
 -13 -15 -4 6.72 0.65
 -13 -15 -4 7.85 0.71
 13 15 -4 7.47 0.62
 13 -16 -4 -0.27 0.57
 13 16 4 0.78 0.24
 13 16 4 1.24 0.33
 -13 -16 4 0.64 0.31
 -13 -16 -4 0.73 0.3
 13 16 -4 0.61 0.3
 13 -16 4 -1.68 0.88
 13 16 -4 0.78 0.23
 -13 -16 -4 0.82 0.29
 13 17 4 -0.07 0.23
 -13 -17 4 -0.31 0.26
 13 -17 -4 0.56 0.47
 13 17 4 0.19 0.2
 -13 -17 -4 0.02 0.26
 13 17 -4 0.31 0.25
 13 17 -4 -0.1 0.18
 13 18 4 -0.08 0.17
 -13 -18 4 -0.02 0.45
 13 18 4 0.07 0.24
 -13 -18 4 -0.11 0.25
 13 18 -4 0.04 0.17
 13 18 -4 0.15 0.22
 -13 -18 -4 0.13 0.25
 13 19 4 3.04 0.35
 13 19 4 3.97 0.48
 13 19 -4 4.97 0.47
 13 19 -4 2.99 0.35
 13 20 4 1.35 0.28
 13 20 4 0.9 0.17
 13 20 -4 0.52 0.16
 13 20 -4 1.25 0.24
 14 0 4 0.21 0.19
 14 1 4 1.03 0.25
 14 1 -4 0.62 0.21
 14 -1 4 0.74 0.21
 14 2 4 0.49 0.22
 14 2 -4 0.49 0.21
 14 -2 4 -0.64 0.53
 14 -2 4 0.35 0.2
 14 -3 -4 21.94 1.7
 14 3 4 21.93 1.54
 14 -3 4 21.81 1.55
 14 -3 4 23.58 2.99
 14 3 -4 18.54 1.51
 14 -4 -4 0.61 0.4
 14 -4 -4 0 0.6
 14 4 4 0.43 0.24
 14 -4 4 0.68 0.22
 14 4 -4 1.08 0.41
 14 -4 4 0.5 0.44
 14 -5 -4 0.3 0.55
 14 5 4 -0.01 0.23
 14 -5 -4 0.48 0.41
 14 -5 -4 0 0.29
 14 5 -4 0.69 0.4
 14 -5 4 0.21 0.39
 14 -5 4 -0.38 0.41
 14 -6 -4 0.75 0.39
 14 -6 -4 0.98 0.48
 14 -6 -4 0.81 0.55
 14 6 4 1.11 0.28
 14 -6 4 0.47 0.45
 14 6 -4 1.42 0.51
 14 -6 4 0.71 0.53
 14 -7 -4 5.91 0.88
 14 -7 -4 3.16 0.88
 -14 -7 4 4.84 0.52
 14 -7 -4 5.65 0.8
 14 7 4 5.02 0.55
 14 -7 4 5.29 0.75
 14 -7 4 5.49 0.97
 14 -7 4 3.14 0.88
 -14 -7 -4 5.03 0.51
 14 7 -4 5.46 0.9
 -14 -8 4 0.1 0.24
 14 8 4 0.49 0.26
 14 -8 -4 0.81 0.55
 -14 -8 4 -0.08 0.23
 14 8 4 0.37 0.29
 14 -8 -4 -0.58 0.39
 14 -8 -4 0.16 0.5
 -14 -8 -4 0.08 0.25
 14 8 -4 0.29 0.31
 14 8 -4 0.76 0.57
 14 -8 4 -0.47 0.47
 14 -8 4 0.28 0.46
 14 -8 4 0.76 0.59
 -14 -8 -4 0.31 0.25
 14 9 4 0.65 0.31
 -14 -9 4 -0.06 0.24
 -14 -9 4 -0.03 0.25
 14 -9 -4 -0.7 0.44
 14 -9 -4 0.26 0.62
 14 9 4 0.41 0.25
 14 -9 -4 0.83 0.57
 14 9 -4 0.51 0.61
 14 -9 4 0.29 0.46
 14 -9 4 -0.71 0.55
 -14 -9 -4 0.12 0.24
 14 -9 4 0.26 0.68
 14 9 -4 0.78 0.33
 -14 -9 -4 0.25 0.24
 14 10 4 0.18 0.26
 -14 -10 4 0.29 0.27
 14 -10 -4 -0.19 0.5
 14 10 4 0.15 0.31
 14 -10 -4 1.14 0.83
 -14 -10 4 -0.01 0.25
 14 -10 -4 0.07 0.6
 -14 -10 -4 0.2 0.26
 14 -10 4 -1.12 0.63
 -14 -10 -4 0.23 0.24
 14 10 -4 -0.09 0.29
 14 -10 4 -0.06 0.48
 14 -10 4 0.17 0.73
 14 11 4 4.38 0.58
 -14 -11 4 4.71 0.52
 14 -11 -4 3.64 1.21
 14 11 4 4.45 0.65
 -14 -11 4 4.64 0.57
 14 -11 -4 5.64 0.93
 14 11 4 4.87 0.89
 -14 -11 -4 4.33 0.49
 14 -11 4 4.79 0.95
 -14 -11 -4 5.68 0.56
 14 11 -4 4.52 0.61
 14 12 4 0.12 0.35
 -14 -12 4 0.08 0.26
 -14 -12 4 -0.44 0.25
 14 -12 -4 -0.09 0.76
 14 -12 -4 0.35 0.99
 14 12 4 0.57 0.61
 14 12 4 0.38 0.29
 14 -12 4 -2.06 0.87
 14 -12 4 -0.17 0.6
 -14 -12 -4 -0.04 0.27
 -14 -12 -4 0.42 0.27
 14 12 -4 -0.13 0.29
 14 -13 -4 -0.22 1.01
 14 13 4 0.04 0.26
 -14 -13 4 0.33 0.3
 14 -13 -4 -1.05 0.57
 14 13 4 -0.14 0.65
 -14 -13 4 -0.15 0.26
 14 13 -4 0.45 0.3
 -14 -13 -4 0.38 0.28
 -14 -13 -4 0.05 0.27
 14 -13 4 -0.14 0.61
 14 14 4 0.05 0.28
 -14 -14 4 0.12 0.31
 -14 -14 4 0.32 0.27
 14 14 -4 -0.33 0.27
 -14 -14 -4 0.33 0.29
 -14 -14 -4 0.06 0.29
 14 14 -4 0.42 0.24
 -14 -15 4 2.87 0.45
 14 15 4 2.86 0.5
 -14 -15 4 2.14 0.4
 -14 -15 -4 2.51 0.37
 14 15 -4 2.14 0.33
 14 15 -4 2.75 0.44
 -14 -15 -4 2.83 0.42
 -14 -16 4 0.68 0.31
 14 -16 -4 0.46 0.61
 14 16 4 1.24 0.32
 -14 -16 -4 0.99 0.31
 14 -16 4 -1.43 0.8
 14 16 -4 0.81 0.3
 14 16 -4 0.17 0.21
 -14 -16 -4 0.94 0.3
 -14 -17 4 -0.56 0.23
 14 17 4 -0.02 0.25
 -14 -17 -4 -0.29 0.23
 14 17 -4 -0.03 0.19
 14 17 -4 0.18 0.24
 -14 -18 4 -0.33 0.23
 -14 -18 4 -0.22 0.44
 14 18 4 -0.46 0.23
 -14 -18 -4 0.44 0.25
 14 18 -4 -0.09 0.17
 14 18 -4 -0.04 0.21
 14 -18 4 -0.19 0.55
 14 19 4 1.31 0.27
 14 19 -4 1.92 0.3
 14 20 4 0.04 0.19
 14 20 -4 -0.02 0.17
 15 0 4 0.16 0.23
 15 0 -4 0.22 0.36
 15 0 -4 -0.24 0.19
 15 1 4 0 0.22
 15 -1 -4 0.47 0.39
 15 1 -4 -0.31 0.2
 15 1 -4 0.01 0.38
 15 -1 4 -0.11 0.21
 15 -2 -4 8.68 0.95
 15 2 4 8.59 0.72
 15 2 -4 6.97 0.68
 15 -2 4 8.57 0.97
 15 2 -4 9.04 0.93
 15 -2 4 9.26 0.76
 15 3 4 10.71 0.83
 15 -3 -4 10.96 1.03
 15 3 -4 8.5 0.79
 15 -3 4 9.79 0.83
 15 3 -4 10.75 1.04
 15 -3 4 9.38 1.06
 15 -3 4 10.87 2.49
 15 -4 -4 2.11 0.51
 15 4 4 1.97 0.32
 15 4 -4 2.97 0.54
 15 -4 4 1.31 0.52
 15 -4 4 1.46 0.3
 15 -4 4 1.24 0.68
 15 -5 -4 9.35 2.58
 15 5 4 4.63 0.54
 15 -5 -4 4.74 0.81
 15 -5 4 4.44 0.86
 15 -5 4 3.29 0.9
 15 -5 4 5.15 0.56
 15 5 -4 4.15 0.66
 15 6 4 8.29 0.76
 15 -6 -4 10.86 2.52
 15 6 4 9.44 0.78
 -15 -6 4 8.22 0.72
 15 -6 -4 9.08 1.07
 15 6 -4 8.27 1.04
 15 -6 4 7.6 1.12
 15 -6 4 7.7 2.18
 -15 -6 -4 8.19 0.69
 15 -7 -4 43.64 5.78
 15 7 4 47.35 3.12
 15 -7 -4 51.33 3.68
 -15 -7 4 44.32 2.68
 15 -7 -4 46.4 3.36
 15 7 4 42.15 2.96
 15 7 -4 47.73 3.39
 -15 -7 -4 46.49 2.66
 15 7 -4 37.03 2.96
 15 -7 4 43.22 5.74
 15 -7 4 42.72 3.4
 -15 -8 4 -0.06 0.27
 -15 -8 4 -0.29 0.23
 15 -8 -4 0.04 0.72
 15 -8 -4 0.53 0.57
 15 8 4 0.66 0.3
 15 8 4 0.4 0.27
 15 -8 -4 1.25 0.58
 15 8 -4 0.22 0.33
 15 8 -4 0.33 0.6
 15 -8 4 0.07 0.64
 15 -8 4 -0.11 0.61
 -15 -8 -4 0.68 0.25
 -15 -8 -4 0.57 0.26
 15 9 4 2.71 0.42
 15 -9 -4 1.72 0.92
 15 -9 -4 3.89 0.78
 -15 -9 4 3.36 0.49
 -15 -9 4 2.97 0.45
 15 -9 -4 3.9 0.87
 15 9 4 3.08 0.52
 15 -9 4 3.57 0.84
 15 9 -4 2.92 0.49
 -15 -9 -4 3 0.42
 15 -9 4 0.63 0.83
 -15 -9 -4 2.36 0.39
 15 -9 4 3.02 0.74
 15 10 4 5.25 0.64
 15 10 4 3.86 0.58
 15 -10 -4 5.99 1.16
 -15 -10 4 4.52 0.57
 -15 -10 4 4.41 0.53
 15 -10 -4 6.13 1.15
 15 -10 -4 1.95 1.04
 -15 -10 -4 5.37 0.55
 -15 -10 -4 5.12 0.51
 15 -10 4 4.39 0.93
 15 10 -4 3.82 0.57
 15 -10 4 3.96 0.92
 15 -11 -4 12.13 1.46
 -15 -11 4 10.4 0.85
 15 -11 -4 7.87 1.57
 15 11 4 9.49 0.91
 15 11 4 11.37 0.97
 -15 -11 4 9.94 0.79
 -15 -11 -4 11.09 0.84
 -15 -11 -4 10.29 0.77
 15 -11 4 8.94 1.34
 15 11 -4 9.58 0.92
 -15 -12 4 0.13 0.29
 15 -12 -4 0.21 1
 15 -12 -4 -1.57 0.71
 15 -12 -4 -1.02 0.73
 15 12 4 0.12 0.29
 -15 -12 4 -0.49 0.26
 15 12 -4 -0.57 0.3
 -15 -12 -4 0.25 0.27
 -15 -12 -4 -0.29 0.25
 15 -12 4 -0.26 0.65
 15 13 4 1.44 0.37
 -15 -13 4 0.42 0.33
 -15 -13 4 0.57 0.31
 15 -13 -4 -1.51 0.77
 -15 -13 -4 0.85 0.32
 -15 -13 -4 0.97 0.32
 15 13 -4 0.72 0.35
 -15 -14 4 1.51 0.33
 -15 -14 4 0.55 0.34
 15 14 4 2.02 0.39
 15 -14 -4 -0.81 0.87
 15 14 -4 2.51 0.43
 -15 -14 -4 1.92 0.35
 -15 -14 -4 1.81 0.37
 -15 -15 4 1.66 0.38
 15 15 4 2.73 0.41
 -15 -15 4 1.99 0.33
 15 -15 -4 -0.03 0.86
 -15 -15 -4 2.03 0.36
 15 15 -4 2.54 0.41
 -15 -15 -4 1.56 0.34
 -15 -16 4 -0.41 0.23
 15 -16 -4 -0.19 0.77
 15 16 4 0.51 0.29
 -15 -16 4 -0.46 0.25
 15 16 -4 0.43 0.27
 -15 -16 -4 -0.35 0.26
 -15 -16 -4 0.06 0.25
 -15 -17 4 -0.2 0.24
 15 17 4 0.15 0.26
 15 -17 -4 -0.42 0.74
 15 17 -4 0.46 0.26
 -15 -17 -4 -0.21 0.23
 15 -17 4 -0.85 0.65
 -15 -18 4 -0.37 0.22
 15 18 4 -0.09 0.21
 15 18 -4 0.17 0.2
 -15 -18 -4 0.04 0.22
 15 19 4 6.6 0.59
 15 19 -4 5.9 0.56
 16 0 4 0.31 0.24
 16 0 -4 0.07 0.41
 16 0 -4 0.16 0.21
 16 -1 -4 0.52 0.24
 16 -1 -4 0.97 0.42
 16 1 4 0.99 0.28
 16 1 -4 0.9 0.43
 16 1 -4 0.67 0.25
 16 -1 4 0.6 0.26
 16 2 4 0.9 0.27
 16 -2 -4 0.97 0.43
 16 -2 4 1 0.28
 16 2 -4 0.76 0.26
 16 2 -4 1.18 0.44
 16 -2 4 0.66 0.46
 16 -3 -4 0.17 0.42
 16 3 4 0.06 0.23
 16 3 -4 -0.1 0.41
 16 -3 4 0.14 0.23
 16 3 -4 0.22 0.23
 16 -3 4 0.19 0.45
 16 4 4 0 0.24
 16 -4 -4 0.53 0.44
 16 -4 4 0.2 0.48
 16 -4 4 0.75 0.84
 16 -4 4 0.64 0.23
 16 4 -4 0.26 0.45
 16 5 4 -0.07 0.26
 16 -5 -4 0.14 0.45
 16 5 4 0.14 0.25
 16 5 -4 0.49 0.5
 16 -5 4 0.24 0.78
 16 -5 4 0.13 0.23
 16 -5 4 -0.14 0.47
 16 6 4 0.95 0.32
 16 -6 -4 1.81 0.59
 -16 -6 4 0.8 0.3
 16 6 4 0.96 0.3
 16 -6 4 1.29 0.31
 16 6 -4 1.51 0.59
 16 -6 4 1.41 0.87
 16 -6 4 0.69 0.6
 16 7 4 0.95 0.29
 16 -7 -4 0.61 0.54
 16 -7 -4 2.33 1.09
 -16 -7 4 0.87 0.31
 -16 -7 4 0.14 0.27
 16 7 4 1.02 0.31
 16 -7 4 1.21 0.63
 16 7 -4 1.08 0.62
 16 -7 4 0.48 0.92
 16 -7 4 1.32 0.33
 -16 -7 -4 0.88 0.28
 16 8 4 0.01 0.29
 16 -8 -4 0 0.99
 -16 -8 4 0.21 0.26
 16 -8 -4 0.08 0.53
 -16 -8 4 0.31 0.29
 16 8 4 0.25 0.27
 -16 -8 -4 0.17 0.27
 16 -8 4 -0.24 0.64
 16 -8 4 -1.49 0.84
 16 8 -4 -0.16 0.33
 16 8 -4 0.49 0.61
 -16 -8 -4 0.11 0.25
 16 9 4 0.2 0.28
 -16 -9 4 0.58 0.27
 16 -9 -4 0.4 1.07
 -16 -9 4 0.41 0.3
 16 9 4 0.21 0.3
 16 -9 -4 -0.03 0.59
 -16 -9 -4 0.35 0.29
 16 -9 4 1.24 0.74
 16 9 -4 -0.02 0.36
 -16 -9 -4 0.44 0.25
 16 -10 -4 0.06 0.63
 16 10 4 0.14 0.32
 16 10 4 0.37 0.31
 -16 -10 4 -0.09 0.26
 16 -10 -4 -0.39 1.03
 -16 -10 4 0.13 0.26
 -16 -10 -4 -0.02 0.25
 -16 -10 -4 0.13 0.26
 16 10 -4 -0.28 0.34
 16 -11 -4 -0.26 1.14
 -16 -11 4 1.22 0.33
 16 11 4 0.52 0.36
 16 -11 -4 1.86 0.8
 16 11 4 1.43 0.37
 -16 -11 4 1.13 0.31
 -16 -11 -4 1.18 0.34
 16 11 -4 1.03 0.39
 -16 -11 -4 0.68 0.3
 -16 -12 4 -0.45 0.25
 16 -12 -4 0.78 0.8
 16 -12 -4 -1.58 1.18
 16 12 4 0.35 0.31
 -16 -12 4 -0.26 0.28
 -16 -12 -4 0.02 0.26
 16 12 -4 -0.33 0.32
 -16 -12 -4 -0.12 0.26
 -16 -13 4 0.1 0.28
 -16 -13 4 -0.32 0.26
 16 13 4 0.17 0.3
 16 -13 -4 -2.2 1.21
 16 13 -4 -0.13 0.33
 -16 -13 -4 -0.08 0.26
 -16 -13 -4 0.09 0.28
 16 14 4 0.76 0.33
 16 -14 -4 -1.11 1.07
 -16 -14 4 0.42 0.27
 -16 -14 4 0.5 0.3
 -16 -14 -4 0.27 0.29
 -16 -14 -4 0.56 0.3
 16 14 -4 0.67 0.32
 -16 -15 4 0.19 0.24
 16 15 4 0.06 0.28
 -16 -15 4 -0.08 0.26
 16 -15 -4 -0.74 1.03
 16 15 -4 0.17 0.28
 -16 -15 -4 0.11 0.27
 -16 -15 -4 -0.2 0.26
 -16 -16 4 0.28 0.23
 16 -16 -4 -0.44 1.07
 16 16 4 0.1 0.28
 -16 -16 4 0.04 0.25
 16 16 -4 -0.3 0.23
 -16 -16 -4 -0.24 0.24
 -16 -16 -4 -0.57 0.24
 16 -16 4 -1.95 0.84
 16 17 4 0.32 0.26
 -16 -17 4 0.28 0.25
 -16 -17 -4 0.34 0.24
 16 17 -4 0.17 0.23
 -16 -18 4 -0.2 0.2
 16 18 4 0.04 0.2
 -16 -18 -4 -0.36 0.21
 16 18 -4 0.25 0.21
 16 19 4 0.53 0.21
 16 19 -4 0.54 0.2
 17 0 4 9.42 0.81
 17 0 -4 10.16 1.07
 17 0 -4 8.37 0.79
 17 -1 -4 2.32 0.54
 17 -1 -4 1.73 0.32
 17 1 4 1.95 0.35
 17 1 -4 2.53 0.58
 17 1 -4 1.64 0.32
 17 -1 4 2.47 0.38
 17 -2 -4 0.49 0.47
 17 2 4 0.36 0.25
 17 -2 -4 0.55 0.26
 17 2 -4 -0.11 0.24
 17 -2 4 0.57 0.48
 17 2 -4 0.31 0.45
 17 -2 4 0.07 0.26
 17 3 4 8.66 0.74
 17 -3 -4 6.98 0.98
 17 3 -4 7.95 1
 17 -3 4 7.75 0.74
 17 -3 4 7.91 1.03
 17 3 -4 6.19 0.68
 17 -4 -4 11.23 1.24
 17 4 4 12.1 1
 17 4 -4 12.54 1.29
 17 -4 4 12.88 1.3
 17 -4 4 11.79 1.02
 17 -5 -4 0.14 0.45
 17 5 4 0.51 0.28
 17 5 -4 0.46 0.52
 17 -5 4 1.06 1.13
 17 -5 4 -0.09 0.27
 17 -5 4 -0.29 0.53
 17 6 4 1.1 0.33
 -17 -6 4 0.5 0.29
 17 6 4 0.92 0.33
 17 -6 -4 0.94 0.55
 17 -6 4 1.8 1.21
 17 6 -4 0.58 0.58
 17 -6 4 1.12 0.63
 17 -6 4 1.1 0.33
 17 7 4 5.91 0.67
 -17 -7 4 4.41 0.53
 17 -7 -4 5.08 0.81
 -17 -7 4 5.12 0.6
 17 7 4 5.8 0.62
 -17 -7 -4 4.49 0.57
 17 -7 4 5.4 0.9
 17 -7 4 6.56 0.67
 17 -7 4 5.19 1.55
 17 7 -4 4.43 0.85
 17 8 4 2.81 0.45
 17 8 4 2.81 0.51
 -17 -8 4 1.43 0.37
 -17 -8 4 1.42 0.33
 17 -8 -4 4.86 0.77
 -17 -8 -4 2.1 0.34
 -17 -8 -4 1.93 0.37
 17 -8 4 3.13 0.54
 17 -8 4 2.87 0.85
 17 -8 4 2.56 1.41
 17 8 -4 2.37 0.48
 -17 -9 4 0.64 0.28
 17 9 4 1.2 0.35
 -17 -9 4 0.61 0.31
 17 -9 -4 0.66 0.67
 17 -9 -4 2.29 1.5
 17 9 4 0.62 0.33
 17 -9 4 0.81 0.34
 17 -9 4 -0.6 0.73
 17 9 -4 0.71 0.39
 17 -9 4 -0.41 1.41
 -17 -9 -4 0.98 0.31
 -17 -9 -4 0.64 0.27
 17 10 4 1.66 0.42
 17 -10 -4 3.19 0.82
 17 10 4 1.95 0.41
 17 -10 -4 4.57 1.66
 -17 -10 4 2.15 0.4
 -17 -10 4 2.03 0.37
 17 -10 4 -0.75 1.67
 -17 -10 -4 1.91 0.33
 17 -10 4 2.21 0.42
 -17 -10 -4 2.5 0.42
 17 10 -4 1.87 0.47
 17 11 4 6.2 0.74
 -17 -11 4 6.53 0.62
 17 -11 -4 7 1.32
 -17 -11 4 6.68 0.69
 17 11 4 5.54 0.75
 17 -11 -4 5.67 1.94
 17 11 -4 5.51 0.78
 -17 -11 -4 7.44 0.63
 17 -11 4 7.95 0.77
 -17 -11 -4 6.92 0.67
 17 -12 -4 1.97 0.82
 17 -12 -4 0.8 1.75
 -17 -12 4 1.77 0.4
 -17 -12 4 2.11 0.35
 17 12 4 1.64 0.43
 -17 -12 -4 1.94 0.38
 17 -12 4 3.11 0.52
 17 12 -4 1.55 0.47
 -17 -12 -4 2.23 0.35
 -17 -13 4 0.12 0.26
 17 -13 -4 -0.81 1.38
 -17 -13 4 0.1 0.29
 17 13 4 0.09 0.32
 17 13 -4 0.72 0.35
 -17 -13 -4 -0.14 0.27
 17 -13 4 0.7 0.3
 -17 -13 -4 -0.04 0.28
 -17 -14 4 2.04 0.38
 -17 -14 4 1.9 0.33
 17 14 4 2.12 0.41
 17 -14 -4 1.05 1.45
 17 14 -4 3.31 0.53
 -17 -14 -4 2.35 0.35
 -17 -14 -4 1.95 0.37
 17 -15 -4 1.3 1.45
 17 15 4 3.82 0.54
 -17 -15 4 2.5 0.41
 -17 -15 4 2.93 0.41
 17 15 -4 4.26 0.53
 -17 -15 -4 3.22 0.44
 -17 -15 -4 2.52 0.38
 -17 -16 4 0.49 0.24
 -17 -16 4 -0.03 0.24
 17 16 4 -0.03 0.27
 17 16 -4 0.64 0.26
 -17 -16 -4 -0.01 0.25
 17 -16 4 -0.09 1.25
 -17 -16 -4 -0.02 0.23
 17 17 4 1.02 0.27
 -17 -17 4 0.45 0.22
 17 17 -4 0.41 0.24
 -17 -17 -4 0.28 0.23
 17 18 4 0.32 0.21
 17 18 -4 0.48 0.2
 18 0 4 -0.24 0.24
 18 0 -4 0.1 0.24
 18 0 -4 0.11 0.44
 18 -1 -4 0.72 0.46
 18 1 4 -0.01 0.24
 18 -1 -4 0.32 0.27
 18 -1 4 0.25 0.26
 18 1 -4 0.32 0.46
 18 1 -4 0.06 0.24
 18 -2 -4 0.22 0.25
 18 2 4 -0.06 0.25
 18 -2 -4 0 0.46
 18 -2 4 0.83 0.53
 18 2 -4 0.99 0.5
 18 -2 4 0.51 0.29
 18 2 -4 0.32 0.25
 18 3 4 1.04 0.31
 18 -3 -4 1.12 0.52
 18 -3 -4 1 0.31
 18 3 -4 1.96 0.57
 18 -3 4 1.23 0.56
 18 -3 4 0.56 0.29
 18 4 4 6.29 0.68
 18 -4 -4 7.34 1.01
 18 -4 4 7.04 0.72
 18 4 -4 6.68 1.04
 18 -4 4 5.88 1.05
 18 -5 -4 0.54 0.51
 18 5 4 0.85 0.31
 18 -5 4 1.3 0.35
 18 5 -4 0.86 0.57
 18 -5 4 0.6 0.63
 18 6 4 0.15 0.28
 -18 -6 4 0.37 0.28
 18 -6 -4 -0.48 0.49
 18 6 4 0.06 0.3
 18 -6 4 0.24 0.6
 18 -6 4 0.3 0.32
 18 6 -4 0.37 0.59
 -18 -7 4 -0.2 0.25
 18 7 4 0.07 0.3
 18 -7 -4 -0.05 0.55
 -18 -7 4 -0.07 0.28
 18 7 4 -0.06 0.29
 -18 -7 -4 -0.07 0.25
 18 -7 4 3.13 1.72
 18 -7 4 -0.26 0.66
 18 7 -4 -0.25 0.63
 18 -7 4 -0.22 0.29
 18 -8 -4 2.59 0.72
 18 8 4 2.02 0.43
 -18 -8 4 1.71 0.33
 18 8 4 1.97 0.4
 -18 -8 4 2.49 0.41
 18 -8 4 2.09 0.81
 18 -8 4 2.42 0.44
 18 -8 4 3.43 1.92
 -18 -8 -4 1.97 0.34
 -18 -8 -4 2.63 0.4
 18 -9 -4 -0.12 0.65
 -18 -9 4 0.24 0.27
 18 9 4 0.35 0.32
 -18 -9 4 -0.3 0.25
 18 9 4 0.27 0.33
 18 -9 4 0.04 0.29
 -18 -9 -4 -0.03 0.28
 18 9 -4 -0.11 0.4
 18 -9 4 1.73 2.03
 -18 -9 -4 0.07 0.25
 18 -9 4 0.86 0.77
 -18 -10 4 0.02 0.27
 18 10 4 -0.15 0.31
 18 10 4 -0.33 0.32
 18 -10 -4 0.26 0.64
 -18 -10 4 -0.26 0.26
 18 -10 4 0.25 0.32
 18 10 -4 -0.33 0.41
 -18 -10 -4 0.05 0.27
 -18 -10 -4 0.36 0.27
 18 -10 4 -0.63 2.21
 18 -11 -4 -0.1 0.7
 18 11 4 0.71 0.35
 18 -11 4 -2.2 2.44
 18 11 -4 0.47 0.42
 -18 -11 -4 0.67 0.3
 18 -12 -4 7.24 2.48
 18 -12 -4 1.97 0.81
 18 12 4 1.56 0.4
 -18 -12 4 1.96 0.36
 -18 -12 4 1.4 0.31
 18 -12 4 1.38 0.36
 18 -12 4 -5.18 2.72
 -18 -12 -4 2.2 0.33
 18 12 -4 1.29 0.43
 -18 -12 -4 1.79 0.35
 18 13 4 -0.36 0.28
 -18 -13 4 -0.18 0.24
 -18 -13 4 -0.23 0.25
 18 -13 -4 2.12 1.85
 -18 -13 -4 -0.15 0.25
 18 -13 4 -3.52 2
 18 -13 4 -0.35 0.27
 -18 -13 -4 0.07 0.27
 18 13 -4 -0.13 0.33
 -18 -14 4 -0.52 0.24
 18 14 4 0.11 0.3
 18 -14 -4 0.27 1.73
 -18 -14 4 -0.4 0.23
 -18 -14 -4 -0.3 0.25
 18 -14 4 -0.65 1.9
 -18 -14 -4 0.25 0.26
 18 14 -4 0.74 0.34
 18 15 4 3.17 0.5
 -18 -15 4 2.28 0.36
 -18 -15 4 2.6 0.37
 -18 -15 -4 2.18 0.36
 18 -15 4 0.07 1.72
 -18 -15 -4 2.98 0.41
 18 15 -4 3.37 0.52
 -18 -16 4 1.5 0.29
 18 16 4 2.35 0.37
 18 16 -4 1.98 0.34
 -18 -16 -4 1.18 0.27
 -18 -16 -4 1.85 0.28
 -18 -17 4 0.08 0.2
 18 17 4 -0.18 0.2
 18 17 -4 0 0.2
 -18 -17 -4 0.23 0.21
 19 0 -4 5.38 0.95
 19 0 4 6.02 0.65
 19 0 -4 6.21 0.65
 19 -1 -4 0.28 0.5
 19 1 4 0.29 0.28
 19 -1 -4 0.51 0.27
 19 1 -4 0.69 0.29
 19 1 -4 0.78 0.49
 19 -1 4 0.89 0.31
 19 -2 -4 1.19 0.56
 19 -2 -4 0.67 0.31
 19 2 4 1.18 0.34
 19 2 -4 0.72 0.52
 19 2 -4 0.44 0.28
 19 -2 4 1.09 0.33
 19 3 4 3.09 0.5
 19 -3 -4 2.55 0.46
 19 -3 -4 3.7 0.71
 19 -3 4 2.8 0.53
 19 3 -4 3.99 0.69
 19 -3 4 3.01 0.71
 19 -4 -4 12.57 1.37
 19 -4 -4 11.28 1.11
 19 4 4 11.83 1.05
 19 4 -4 13.68 1.42
 19 -4 4 15.33 1.12
 19 -4 4 12.05 1.42
 19 5 4 0.86 0.31
 19 -5 -4 0.53 0.39
 19 -5 -4 0.89 0.52
 19 -5 4 0.83 0.32
 19 -5 4 0.69 0.65
 19 5 -4 1.01 0.61
 19 6 4 0.47 0.31
 19 -6 -4 0.19 0.53
 19 -6 4 -0.37 0.3
 19 -6 4 1.22 0.69
 19 6 -4 -0.2 0.59
 -19 -7 4 0.84 0.34
 19 -7 -4 2.6 0.68
 -19 -7 4 1.41 0.3
 19 7 4 1.46 0.36
 19 7 4 1.4 0.4
 19 -7 4 1.32 0.41
 -19 -7 -4 1.58 0.33
 19 -7 4 2.29 0.79
 19 8 4 10.04 0.96
 -19 -8 4 8.66 0.77
 19 -8 -4 10.29 1.33
 19 8 4 10.56 0.92
 -19 -8 4 10.31 0.83
 19 -8 4 12.01 0.98
 -19 -8 -4 9.44 0.77
 -19 -8 -4 9.5 0.82
 19 -8 4 9.5 1.48
 19 -10 -4 0.78 0.64
 -19 -10 4 0.13 0.27
 -19 -10 4 0.48 0.29
 19 10 4 0.37 0.36
 19 10 4 0.57 0.33
 19 10 -4 0.31 0.45
 -19 -10 -4 0.44 0.3
 19 -10 4 0.01 0.33
 -19 -10 -4 0.42 0.28
 19 -11 -4 0.86 0.7
 -19 -11 4 0.76 0.29
 19 11 4 0.61 0.36
 -19 -11 4 0.69 0.31
 19 -11 4 0.75 0.34
 19 11 -4 1.19 0.44
 -19 -11 -4 0.87 0.27
 19 -11 4 5.43 2.77
 -19 -11 -4 0.66 0.29
 -19 -12 4 8.54 0.76
 19 12 4 8.63 0.86
 -19 -12 4 8.72 0.71
 19 12 -4 8.13 0.94
 19 -12 4 4.86 3
 19 -12 4 10.63 0.88
 -19 -12 -4 10.09 0.72
 -19 -12 -4 8.57 0.75
 -19 -13 4 -0.17 0.26
 -19 -13 4 0.14 0.25
 19 13 4 0.24 0.33
 -19 -13 -4 0.81 0.29
 19 13 -4 0.11 0.37
 -19 -13 -4 0.39 0.25
 19 -13 4 1.13 2.58
 19 14 4 4.47 0.57
 -19 -14 4 2.93 0.46
 -19 -14 4 4.17 0.43
 -19 -14 -4 3.36 0.47
 19 14 -4 3.9 0.6
 -19 -14 -4 3.39 0.46
 -19 -15 4 0.03 0.22
 -19 -15 4 -0.27 0.2
 19 15 4 -0.05 0.25
 -19 -15 -4 -0.26 0.21
 -19 -15 -4 -0.23 0.2
 19 15 -4 0.03 0.25
 -19 -16 4 0.3 0.22
 19 16 4 0.94 0.26
 -19 -16 -4 0.45 0.22
 -19 -16 -4 0.67 0.23
 19 16 -4 1.14 0.27
 20 0 4 24.7 1.74
 20 0 -4 24.53 2.01
 20 0 -4 20.86 1.7
 20 1 4 0.41 0.29
 20 -1 -4 0.36 0.49
 20 -1 -4 0.03 0.29
 20 -1 4 -0.17 0.26
 20 1 -4 -0.69 0.49
 20 1 -4 -0.31 0.26
 20 2 4 -0.14 0.27
 20 -2 -4 -0.12 0.28
 20 -2 -4 -0.13 0.49
 20 2 -4 0.11 0.53
 20 2 -4 0.15 0.25
 20 -2 4 0.41 0.3
 20 -3 -4 0.46 0.32
 20 -3 -4 -0.62 0.45
 20 3 4 0.1 0.27
 20 3 -4 0.83 0.57
 20 -3 4 0.11 0.29
 20 -3 4 -0.52 0.59
 20 -4 -4 13.76 1.46
 20 4 4 13.77 1.16
 20 -4 -4 13.77 1.24
 20 -4 4 14.56 1.54
 20 -4 4 15.03 1.21
 20 4 -4 16.35 1.55
 20 -5 -4 0.22 0.37
 20 5 4 0.43 0.29
 20 -5 -4 0.04 0.53
 20 5 -4 0.12 0.59
 20 -5 4 -0.21 0.33
 20 -5 4 0.72 0.66
 20 6 4 1.73 0.37
 20 -6 -4 2.74 0.68
 20 -6 -4 1.47 0.48
 20 -6 4 2.16 0.44
 20 6 -4 1.61 0.7
 20 -6 4 1.54 0.74
 -20 -7 4 0.86 0.29
 -20 -7 4 0.56 0.31
 20 7 4 0.41 0.31
 20 -7 -4 0.8 0.47
 20 -7 -4 0.97 0.63
 20 -7 4 0.4 0.73
 20 -7 4 1.19 0.37
 20 -8 -4 2.43 0.74
 20 8 4 3.71 0.56
 -20 -8 4 3.35 0.48
 20 -8 -4 5.29 0.86
 -20 -8 4 3.53 0.52
 20 8 4 3.45 0.55
 -20 -8 -4 3.43 0.5
 20 -8 4 4.01 0.62
 20 -8 4 3.49 0.89
 -20 -8 -4 4.13 0.48
 20 9 4 0.08 0.38
 20 9 4 0.32 0.32
 20 -9 -4 0.72 0.66
 -20 -9 4 0.89 0.27
 -20 -9 4 0.73 0.29
 -20 -9 -4 0.42 0.27
 20 -9 4 0.26 0.34
 -20 -9 -4 1.13 0.3
 -20 -10 4 1.04 0.29
 20 10 4 0.82 0.4
 20 -10 -4 0.85 0.7
 -20 -10 4 0.73 0.3
 -20 -10 -4 1.32 0.31
 20 -10 4 1.61 0.38
 -20 -10 -4 1.44 0.3
 -20 -11 4 0.2 0.25
 20 11 4 0.06 0.35
 -20 -11 4 0.05 0.25
 20 -11 -4 0.11 0.63
 20 11 -4 -0.22 0.4
 -20 -11 -4 -0.05 0.24
 20 -11 4 -0.05 0.3
 -20 -11 -4 0.05 0.25
 -20 -12 4 2.9 0.47
 20 12 4 3.94 0.6
 -20 -12 4 3.19 0.44
 20 12 -4 3.47 0.59
 -20 -12 -4 4.13 0.46
 -20 -12 -4 3.43 0.47
 20 -12 4 4.58 0.57
 20 13 4 2.6 0.45
 -20 -13 4 2.38 0.38
 -20 -13 4 1.55 0.33
 -20 -13 -4 2.85 0.41
 20 13 -4 2.43 0.48
 -20 -13 -4 3.18 0.42
 -20 -14 4 -0.1 0.22
 -20 -14 4 -0.16 0.19
 20 14 4 0.3 0.27
 -20 -14 -4 0.08 0.21
 20 14 -4 0.32 0.3
 -20 -14 -4 -0.15 0.22
 -20 -15 4 0.51 0.2
 -20 -15 4 0.17 0.22
 20 15 4 1.22 0.28
 20 15 -4 1.1 0.31
 -20 -15 -4 0.25 0.21
 -20 -15 -4 0.99 0.23
 21 0 -4 0.71 0.57
 21 0 4 0.52 0.3
 21 0 -4 0.8 0.32
 21 -1 -4 -0.22 0.51
 21 1 4 0.18 0.29
 21 -1 -4 0.19 0.31
 21 1 -4 -0.01 0.27
 21 -1 4 0.11 0.28
 21 1 -4 -0.08 0.53
 21 -2 -4 0.29 0.33
 21 2 4 0.12 0.28
 21 -2 -4 0.43 0.51
 21 2 -4 0.42 0.57
 21 -2 4 0.41 0.32
 21 3 4 0.02 0.27
 21 -3 -4 -0.11 0.5
 21 -3 -4 -0.05 0.32
 21 -3 4 -0.08 0.32
 21 3 -4 0.53 0.6
 21 -4 -4 2.8 0.52
 21 -4 -4 2.36 0.67
 21 4 4 3.01 0.51
 21 -4 4 3.32 0.57
 21 4 -4 2.45 0.75
 21 -4 4 2.4 0.77
 21 5 4 0.1 0.29
 21 -5 -4 0.82 0.57
 21 -5 -4 0.57 0.41
 21 -5 4 0.71 0.7
 21 -5 4 0.27 0.35
 21 5 -4 1.04 0.66
 21 6 4 0.07 0.29
 21 -6 -4 0.38 0.43
 21 -6 -4 -0.02 0.57
 21 -6 4 0.41 0.7
 21 -6 4 -0.17 0.32
 21 7 4 2.75 0.51
 -21 -7 4 1.92 0.39
 -21 -7 4 2.09 0.36
 21 -7 -4 4.31 0.74
 21 -7 -4 2.42 0.69
 21 -7 4 3.19 0.58
 21 -7 4 2.74 0.81
 -21 -8 4 11.2 0.86
 -21 -8 4 11.21 0.92
 21 8 4 11.76 1.02
 21 -8 -4 12.87 1.44
 -21 -8 -4 13.99 0.89
 21 -9 -4 0.71 0.52
 21 -9 -4 0.17 0.63
 -21 -9 4 -0.08 0.28
 -21 -9 4 0.2 0.25
 21 9 4 0.53 0.41
 -21 -9 -4 0.21 0.28
 -21 -9 -4 0.9 0.28
 21 -9 4 0.57 0.36
 21 -10 -4 1.65 0.57
 21 10 4 0.92 0.42
 -21 -10 4 0.59 0.26
 -21 -10 4 0.28 0.27
 21 -10 -4 0.94 0.66
 -21 -10 -4 0.79 0.27
 -21 -10 -4 0.94 0.28
 21 -10 4 0.72 0.38
 -21 -11 4 -0.1 0.26
 21 -11 -4 0.31 0.48
 -21 -11 4 0.27 0.23
 21 11 4 0.75 0.38
 -21 -11 -4 0.65 0.26
 -21 -11 -4 -0.21 0.23
 21 12 4 2.14 0.44
 -21 -12 4 1.29 0.3
 -21 -12 4 1.65 0.27
 -21 -12 -4 2.56 0.39
 -21 -12 -4 1.87 0.31
 21 13 4 2.14 0.42
 -21 -13 4 1.34 0.29
 -21 -13 4 2.06 0.27
 -21 -13 -4 2.02 0.3
 21 13 -4 2.05 0.44
 -21 -13 -4 2.05 0.29
 -21 -14 4 0.75 0.2
 21 14 4 -0.1 0.26
 -21 -14 4 0.67 0.23
 -21 -14 -4 0.18 0.2
 21 14 -4 0.33 0.33
 -21 -14 -4 -0.05 0.2
 22 0 -4 4.91 0.63
 22 0 -4 5.36 0.88
 22 0 4 6.77 0.69
 22 -1 -4 9.59 0.92
 22 -1 -4 11.25 1.29
 22 1 4 10.7 0.93
 22 1 -4 10.78 1.32
 22 1 -4 9.54 0.9
 22 -1 4 11.97 0.97
 22 2 4 -0.08 0.27
 22 -2 -4 0.08 0.33
 22 -2 -4 0.08 0.5
 22 -2 4 0.36 0.32
 22 2 -4 0.35 0.58
 22 3 4 11.26 1.02
 22 -3 -4 12.49 1.36
 22 -3 -4 11.38 1.08
 22 3 -4 13.27 1.45
 22 -3 4 13.6 1.08
 22 4 4 5.78 0.65
 22 -4 -4 6.4 0.78
 22 -4 -4 4.98 0.87
 22 4 -4 5.61 0.96
 22 -4 4 7.21 0.72
 22 -5 -4 0.16 0.53
 22 -5 -4 0.59 0.4
 22 5 4 0.49 0.3
 22 -5 4 0.82 0.38
 22 -5 4 0.98 0.72
 22 -6 -4 -0.02 0.56
 22 -6 -4 -0.05 0.42
 22 6 4 -0.14 0.27
 22 -6 4 0.45 0.71
 22 -6 4 -0.14 0.33
 22 7 4 6.17 0.69
 22 -7 -4 9.14 0.96
 22 -7 -4 6.84 1.12
 -22 -7 4 5.95 0.59
 22 -7 4 8.61 0.81
 -22 -8 4 3.85 0.45
 22 -8 -4 3.55 0.8
 22 8 4 3.46 0.54
 -22 -8 4 2.31 0.4
 22 -8 -4 5.58 0.82
 22 -8 4 3.64 0.63
 -22 -9 4 0.45 0.27
 22 -9 -4 -0.29 0.5
 -22 -9 4 0.32 0.23
 22 -9 -4 0.04 0.59
 -22 -9 -4 0.58 0.25
 22 -9 4 0.02 0.35
 -22 -9 -4 0.24 0.25
 22 10 4 -0.58 0.37
 -22 -10 4 0.06 0.21
 22 -10 -4 -0.35 0.57
 -22 -10 4 -0.33 0.24
 -22 -10 -4 -0.04 0.23
 -22 -10 -4 0.03 0.23
 22 11 4 6.2 0.72
 -22 -11 4 5.7 0.49
 -22 -11 4 4.51 0.52
 -22 -11 -4 5.86 0.53
 -22 -11 -4 5.93 0.52
 -22 -12 4 2.8 0.36
 -22 -12 4 2.21 0.34
 22 12 4 3.73 0.57
 -22 -12 -4 2.7 0.39
 -22 -12 -4 3.55 0.39
 -22 -13 4 0.22 0.21
 -22 -13 4 0.56 0.19
 -22 -13 -4 0.27 0.2
 23 0 -4 0.68 0.33
 23 0 -4 0.9 0.62
 23 0 4 1.4 0.36
 23 -1 -4 1.49 0.36
 23 1 4 1.44 0.35
 23 -1 -4 2.13 0.65
 23 -1 4 1.95 0.4
 23 1 -4 1.26 0.65
 23 -2 -4 -0.41 0.31
 23 -2 -4 0.15 0.55
 23 2 4 0.13 0.28
 23 -2 4 0.07 0.31
 23 2 -4 0.5 0.64
 23 3 4 1.43 0.35
 23 -3 -4 1.58 0.65
 23 -3 -4 1.73 0.43
 23 3 -4 3.21 0.76
 23 -3 4 1.62 0.4
 23 -4 -4 0.55 0.4
 23 -4 -4 1.73 0.61
 23 4 4 0.5 0.28
 23 -4 4 0.91 0.38
 23 -5 -4 1.08 0.45
 23 5 4 0.52 0.31
 23 -5 -4 0.79 0.59
 23 -5 4 1.02 0.38
 23 6 4 -0.02 0.27
 23 -6 -4 0.31 0.57
 23 -6 -4 0.22 0.45
 23 -6 4 0.25 0.34
 23 -7 -4 1.51 0.55
 23 -7 -4 1.27 0.61
 -23 -7 4 0.87 0.27
 23 -7 4 1.54 0.4
 23 -8 -4 0.47 0.6
 -23 -8 4 0.43 0.24
 -23 -8 -4 0.79 0.25
 -23 -9 4 0.17 0.22
 -23 -9 4 0.09 0.25
 23 -9 -4 0.97 0.63
 -23 -9 -4 0.03 0.24
 -23 -9 -4 0.36 0.24
 -23 -10 4 0.6 0.28
 -23 -10 4 0.54 0.22
 -23 -10 -4 1.19 0.25
 -23 -10 -4 0.95 0.26
 -23 -11 4 1.24 0.28
 -23 -11 4 2.16 0.33
 -23 -11 -4 2.27 0.35
 24 0 4 0.57 0.32
 24 0 -4 0.26 0.62
 24 1 4 13.11 1.07
 24 -1 -4 12.52 1.45
 24 -1 4 13.76 1.1
 24 1 -4 11.14 1.46
 24 2 4 0.57 0.3
 24 -2 -4 -0.32 0.58
 24 -2 4 0.95 0.34
 24 2 -4 0.05 0.63
 24 -3 -4 12.35 1.49
 24 -3 4 15.57 1.21
 24 -4 -4 -0.21 0.56
 24 -5 -4 5.53 1.02
 24 -6 -4 -0.4 0.55
 -24 -7 4 10.19 0.73
 24 -7 -4 10.63 1.26
 24 -8 -4 -0.01 0.57
 -24 -8 4 -0.26 0.2
 -24 -8 -4 0.5 0.23
 -24 -9 4 1.44 0.25
 -24 -9 -4 1.59 0.26
 -24 -10 4 -0.35 0.18
 -24 -10 -4 0.38 0.21
 25 0 -4 1.12 0.71
 25 -1 -4 1.51 0.73
 25 1 -4 2.76 0.81
 25 -2 -4 0.58 0.68
 25 -3 -4 1.91 0.72
 25 -4 -4 -0.46 0.61
 0 -1 5 0.22 0.06
 0 -2 5 1000 62.35
 0 3 5 -0.31 0.1
 0 -3 5 0.05 0.06
 0 -4 5 70.86 4.55
 0 4 5 73.85 5.42
 0 -5 5 0.13 0.09
 0 5 5 0.05 0.12
 0 -5 5 0.13 0.04
 0 5 5 0.35 0.17
 0 -6 5 245.81 15.56
 0 6 -5 247.01 15.99
 0 6 5 239.6 16.04
 0 6 5 262.71 18.52
 0 7 5 0.12 0.15
 0 -7 5 0.1 0.11
 0 7 5 0.31 0.2
 0 7 -5 0.06 0.12
 0 8 5 11.98 0.97
 0 -8 5 12.6 0.88
 0 8 -5 12.47 0.9
 0 8 5 13.35 1.06
 0 9 5 -0.07 0.19
 0 9 5 0.07 0.17
 0 -9 5 0 0.13
 0 9 -5 0.21 0.15
 0 10 5 189.88 13.7
 0 -10 5 185.74 11.52
 0 10 5 178.12 11.88
 0 10 -5 178.76 11.82
 0 11 5 -0.13 0.2
 0 -11 5 0.06 0.14
 0 11 -5 0.12 0.17
 0 11 5 0.07 0.19
 0 -11 5 -0.16 0.46
 0 -12 5 36.85 4.7
 0 12 -5 35.68 2.41
 0 -12 5 35.17 2.36
 0 12 5 34.25 2.47
 0 12 5 36.9 2.81
 0 13 -5 -0.12 0.17
 0 13 5 0.29 0.23
 0 -13 5 0.18 0.51
 0 -13 5 0.08 0.17
 0 13 5 0.5 0.27
 0 -14 5 102.7 6.54
 0 14 5 102.42 6.78
 0 14 -5 101.32 6.71
 0 14 5 105.32 7.79
 0 -14 5 100.77 12.24
 0 -15 5 -0.01 0.44
 0 15 5 -0.2 0.16
 0 -15 5 -0.04 0.41
 0 15 5 -0.35 0.25
 0 15 5 0.09 0.25
 0 16 -5 29.28 1.81
 0 16 5 29.19 2.18
 0 16 5 30.19 1.8
 0 -16 5 33.51 4.17
 0 17 5 -0.17 0.17
 0 17 5 0.22 0.27
 0 17 -5 0.26 0.2
 0 -17 5 0.18 0.5
 0 18 5 40.79 2.45
 0 18 5 43.94 2.44
 0 18 5 38.46 2.89
 0 18 -5 41.95 2.44
 0 -18 5 41.37 5.37
 0 19 5 0.15 0.19
 0 19 -5 0.16 0.2
 0 -19 5 -0.12 0.45
 0 19 5 -0.04 0.17
 0 20 -5 25.15 1.49
 0 -20 5 26.25 3.41
 0 20 -5 24.15 1.49
 0 20 5 22.83 1.47
 0 20 5 23.63 1.49
 0 21 5 0.39 0.18
 0 -21 5 0.09 0.44
 0 21 5 0.13 0.17
 0 21 -5 0.1 0.18
 0 21 -5 -0.23 0.18
 0 -22 5 39.86 5.3
 0 22 5 39.96 2.48
 0 22 5 44.85 2.51
 0 22 -5 45.68 2.52
 0 23 5 -0.13 0.14
 0 23 -5 -0.15 0.16
 0 23 5 -0.01 0.15
 1 0 5 0.29 0.07
 -1 -1 5 2.19 0.18
 -1 1 -5 2.39 0.17
 1 -1 5 1.98 0.18
 -1 -2 5 26.56 1.81
 -1 2 -5 31.89 1.73
 1 2 5 28.6 2.18
 1 -2 5 27.49 1.82
 -1 -3 5 0.21 0.08
 1 3 5 0.16 0.12
 1 -3 5 0.16 0.07
 1 -3 5 0.18 0.04
 -1 -4 5 5.39 0.4
 1 4 5 5.68 0.49
 1 4 5 5.36 0.52
 1 -4 5 5.96 0.34
 1 -4 5 5.4 0.4
 -1 4 5 4.46 0.47
 -1 -5 5 16.23 1.06
 1 5 5 17.22 1.29
 1 5 5 16.77 1.18
 -1 5 5 16.27 1.27
 1 5 -5 14.83 1.09
 1 -5 5 18.09 0.99
 1 -5 5 13.67 1.3
 1 -5 5 15.96 1.07
 -1 6 -5 6.82 0.52
 1 6 5 7.15 0.62
 -1 -6 5 6.87 0.51
 1 6 5 7.44 0.63
 -1 6 5 6.75 0.61
 -1 6 5 6.1 0.58
 1 -6 5 7.85 0.53
 1 6 -5 6.52 0.53
 1 7 5 12.78 1.02
 -1 -7 5 12.32 0.84
 -1 7 -5 11.99 0.85
 1 7 5 11.96 0.94
 1 -7 5 11.43 0.85
 1 7 -5 11.96 0.86
 -1 7 5 12.87 1.01
 -1 7 5 11.87 0.92
 1 8 5 9.15 0.79
 1 8 5 9.99 0.77
 -1 -8 5 8.88 0.65
 -1 8 -5 9.25 0.67
 1 -8 5 8.77 0.66
 1 8 -5 8.41 0.67
 -1 8 5 9.14 0.78
 -1 8 5 8.12 0.72
 1 9 5 1.7 0.32
 -1 -9 5 1.55 0.25
 1 9 5 1.99 0.34
 -1 9 -5 1.37 0.25
 1 9 -5 1.32 0.22
 -1 9 5 1.38 0.28
 -1 9 5 1.39 0.3
 1 -9 5 1.4 0.22
 -1 -10 5 0.67 0.17
 -1 10 -5 0.45 0.18
 1 10 5 0.74 0.22
 1 10 5 0.89 0.27
 -1 10 5 1.17 0.24
 -1 10 5 0.69 0.25
 1 -10 5 0.62 0.18
 1 10 -5 0.79 0.2
 -1 -11 5 1.59 0.26
 1 11 5 1.5 0.3
 -1 -11 5 1.03 0.57
 1 11 5 1.28 0.31
 -1 11 -5 1.56 0.25
 1 -11 5 1.08 0.67
 1 11 -5 1.4 0.25
 1 -11 5 1.39 0.24
 -1 11 5 1.1 0.28
 -1 11 5 1.7 0.33
 -1 12 -5 8.99 0.71
 -1 -12 5 8.97 0.7
 1 12 5 9.1 0.84
 -1 -12 5 7.68 1.65
 1 12 5 7.74 0.78
 1 -12 5 8.85 1.82
 -1 12 5 9.18 0.84
 1 -12 5 8.74 0.7
 1 12 -5 9.36 0.72
 -1 12 5 8.69 0.78
 -1 13 -5 2.29 0.34
 -1 -13 5 1.27 0.65
 1 13 5 2.32 0.41
 -1 -13 5 1.8 0.28
 1 13 5 2.14 0.39
 -1 13 5 2.05 0.4
 1 13 -5 1.74 0.31
 1 -13 5 1.73 0.3
 -1 13 5 2.33 0.41
 1 -13 5 1.49 0.72
 1 -14 -5 0.21 0.46
 1 14 5 0.39 0.27
 1 14 5 -0.17 0.25
 -1 -14 5 -0.26 0.46
 -1 14 5 -0.15 0.24
 1 -14 5 0.32 0.2
 1 14 -5 0.37 0.21
 -1 14 5 0.59 0.27
 1 -14 5 -0.05 0.52
 1 -14 5 0.7 0.45
 1 15 5 3.72 0.38
 -1 -15 5 2.91 0.89
 1 15 5 4.11 0.55
 1 15 5 3.92 0.54
 1 15 -5 3.35 0.37
 1 -15 5 3.79 0.46
 -1 15 5 4.15 0.53
 1 15 -5 4.25 0.48
 1 -15 5 4.22 1.3
 1 -15 5 3.43 0.71
 1 16 5 -0.06 0.16
 1 16 5 0.45 0.29
 1 16 5 0.23 0.29
 -1 -16 5 0 0.49
 1 16 5 -0.09 0.18
 -1 16 5 0.56 0.29
 1 16 -5 0.32 0.19
 1 -16 5 -0.2 0.47
 1 -16 5 0.22 0.46
 1 17 5 4.19 0.42
 1 17 5 4.47 0.58
 -1 -17 5 4.73 1.35
 1 17 5 4.05 0.43
 1 17 -5 4.24 0.44
 1 -17 5 5.33 1.41
 -1 17 5 4.43 0.43
 -1 17 5 4.43 0.58
 1 18 5 0.42 0.2
 1 18 5 0.4 0.29
 -1 -18 5 0.21 0.51
 1 18 5 0.38 0.18
 1 18 -5 0.39 0.19
 -1 18 5 0.42 0.3
 -1 18 5 0.28 0.2
 1 -18 5 0.26 0.5
 1 18 -5 0.49 0.2
 -1 -19 5 0.69 0.57
 1 19 5 1.03 0.22
 1 19 5 1.01 0.22
 1 19 -5 1.02 0.23
 1 19 -5 1.06 0.24
 1 -19 5 0.71 0.57
 -1 19 5 1.13 0.22
 1 20 5 0.27 0.19
 -1 -20 5 -0.26 0.41
 1 20 5 0.1 0.18
 -1 20 5 -0.1 0.18
 -1 20 5 -0.2 0.17
 1 -20 5 -0.22 0.42
 1 20 -5 0.15 0.19
 1 20 -5 0.04 0.19
 1 21 5 1.74 0.26
 -1 -21 5 1.46 0.6
 1 21 5 2.7 0.34
 -1 21 5 1.88 0.3
 -1 21 5 2.28 0.33
 1 -21 5 1.23 0.61
 1 21 -5 3.53 0.35
 1 21 -5 2.98 0.34
 1 22 5 0.37 0.18
 1 22 5 0.08 0.17
 -1 22 -5 0.44 0.19
 -1 -22 5 0.24 0.4
 -1 22 5 0.32 0.18
 1 -22 5 0.41 0.42
 1 22 -5 0.63 0.19
 1 22 -5 0.39 0.18
 -1 23 -5 0.37 0.17
 1 23 5 0.09 0.15
 1 23 5 0.21 0.15
 -1 23 5 0.26 0.15
 1 23 -5 0.34 0.17
 1 23 -5 0.16 0.17
 2 0 5 0.25 0.07
 2 0 5 -0.33 0.09
 -2 0 -5 0.1 0.06
 2 1 5 194.29 14.42
 -2 1 -5 203.99 11.62
 -2 -1 -5 188.22 11.63
 2 -1 5 203.64 11.62
 2 -1 5 180.2 12.12
 -2 -2 5 185.08 12.99
 2 2 5 210.06 15.47
 -2 2 -5 227.25 12.46
 2 2 -5 213.17 12.44
 2 -2 5 215.81 12.46
 2 -2 5 197.24 13
 -2 -3 5 0.99 0.13
 2 3 5 0.87 0.17
 2 -3 5 0.62 0.11
 2 -3 5 0.59 0.09
 2 4 5 6.63 0.61
 -2 -4 5 6.63 0.48
 2 4 5 7.28 0.62
 2 -4 5 7.47 0.45
 2 -4 5 6.87 0.51
 -2 -5 5 177.63 11.95
 2 5 5 195.64 12.36
 2 5 5 205.02 14.25
 2 -5 5 183.6 11.97
 -2 5 5 180.29 14.22
 2 -5 5 209.34 11.45
 2 5 -5 187.09 12.29
 2 6 5 173.56 12.41
 2 6 5 166.68 10.77
 -2 -6 5 163.63 10.41
 -2 6 5 159.32 12.38
 2 -6 5 179.23 9.96
 2 -6 5 167.12 10.43
 2 6 -5 153.84 10.7
 -2 -7 5 13.99 0.98
 2 7 5 15.06 1.11
 2 7 5 14.42 1.2
 -2 7 -5 14.47 1
 2 -7 5 14.65 1.01
 2 -7 5 15.65 0.91
 -2 7 5 14.26 1.17
 2 -7 5 14.39 1.26
 2 7 -5 14.33 1.02
 -2 -8 5 19.23 1.29
 -2 8 -5 18.92 1.33
 2 8 5 20.54 1.57
 2 8 5 20.51 1.43
 -2 8 5 19.22 1.55
 2 -8 5 19.65 1.32
 2 8 -5 19.36 1.35
 -2 8 5 18.85 1.39
 2 9 5 83 5.25
 -2 -9 5 77.91 5.02
 2 9 5 82.08 6
 -2 9 -5 78.22 5.15
 2 9 -5 78.6 5.17
 2 -9 5 81.88 5.05
 -2 9 5 74.21 5.21
 -2 9 5 78.42 5.98
 -2 10 -5 86 5.7
 2 10 5 94.72 5.8
 -2 -10 5 86.07 5.55
 2 10 5 89.61 6.63
 2 -10 5 89.71 5.58
 2 10 -5 86.74 5.72
 -2 10 5 85.12 6.61
 -2 10 5 84.03 5.76
 2 11 5 20.24 1.44
 -2 11 -5 19.37 1.34
 2 11 5 19.76 1.59
 -2 -11 5 18.97 1.31
 2 11 -5 19.41 1.37
 2 -11 5 15.19 2.86
 -2 11 5 20.02 1.58
 2 -11 5 19.92 1.34
 -2 11 5 17.89 1.4
 -2 12 -5 24.18 1.71
 2 12 5 26.15 2.02
 2 -12 -5 28.18 3.29
 2 12 5 23.78 1.8
 -2 -12 5 24.01 3.37
 2 -12 5 24.84 1.7
 -2 12 5 25.63 1.79
 2 12 -5 23.75 1.73
 2 -12 5 22.14 3.54
 2 -12 5 25.46 2.14
 -2 12 5 25.04 2
 2 -13 -5 44.14 5.26
 -2 -13 5 41.57 5.34
 2 13 5 43.84 3.32
 2 13 5 42.21 2.93
 -2 13 5 43.62 2.91
 -2 13 5 42.92 3.3
 2 -13 5 39.06 3.42
 2 13 -5 41.74 2.85
 2 -13 5 39.73 5.48
 2 -13 5 42.89 2.8
 2 14 5 53.62 3.05
 2 -14 -5 54.81 6.5
 2 14 5 52.51 3.62
 2 14 5 51.54 4.11
 -2 -14 5 48.74 6.54
 2 -14 5 54.64 4.25
 -2 14 5 52.87 3.6
 2 -14 5 51.19 6.71
 2 -14 5 54.12 3.47
 2 14 -5 55.21 3.06
 -2 14 5 50.5 4.09
 2 14 -5 54.16 3.55
 2 15 5 6.56 0.49
 2 -15 -5 5.92 1.4
 -2 -15 5 5.41 1.48
 2 15 5 6.01 0.66
 2 15 5 5.4 0.48
 2 15 5 5.41 0.67
 2 -15 5 6.18 0.87
 2 -15 5 4.6 1.48
 2 15 -5 6.18 0.6
 2 -15 5 5.73 0.59
 -2 15 5 5.83 0.64
 2 15 -5 6.34 0.5
 2 16 5 33.59 1.98
 2 16 5 31.11 1.98
 2 16 5 32.39 2.68
 2 16 5 34.2 2.39
 -2 -16 5 36.99 4.51
 2 16 -5 31.93 2.31
 2 -16 5 32.63 2.83
 2 16 -5 34.75 2
 2 -16 5 34.36 4.54
 2 -16 5 33.71 2.28
 -2 16 5 33.5 2.37
 2 16 -5 32.14 1.99
 2 17 5 25.82 1.62
 2 17 5 26.53 1.62
 2 17 5 27.81 1.99
 -2 -17 5 27.3 3.74
 2 -17 5 23.4 2.31
 2 17 -5 26.4 1.63
 -2 17 5 26.9 1.97
 2 -17 5 29.96 3.86
 2 17 -5 27.82 1.64
 2 18 5 30.12 1.84
 2 18 5 30.42 1.85
 2 18 5 26.72 2.19
 -2 -18 5 32.07 4.18
 2 -18 5 33.33 4.26
 2 18 -5 32.81 1.87
 2 18 -5 32.17 1.86
 -2 18 5 28.7 2.21
 2 19 5 0.7 0.21
 -2 -19 5 0.29 0.51
 2 19 5 0.53 0.19
 2 19 -5 0.66 0.21
 2 19 -5 0.44 0.21
 2 -19 5 0.2 0.5
 2 20 5 22.03 1.44
 -2 -20 5 24.88 3.34
 2 20 5 22.74 1.45
 2 20 -5 24.01 1.46
 2 -20 5 26.81 3.41
 2 20 -5 23.28 1.46
 2 21 5 27.84 1.8
 -2 -21 5 28.78 3.98
 2 21 5 31.23 1.83
 2 -21 5 31.93 4.06
 2 21 -5 31.4 1.83
 2 21 -5 31.31 1.83
 2 22 5 18.2 1.22
 2 22 5 21.82 1.24
 -2 -22 5 18.7 2.75
 2 22 -5 21.06 1.24
 2 22 -5 19.61 1.23
 -2 22 5 20.08 1.23
 2 -22 5 19.31 2.77
 -2 23 -5 -0.04 0.17
 2 23 5 0.19 0.15
 2 23 5 0.04 0.14
 -2 23 5 0.44 0.16
 2 23 -5 0.2 0.16
 2 23 -5 0.25 0.16
 3 0 5 0.11 0.11
 -3 0 -5 0.14 0.07
 3 0 5 0.1 0.06
 3 0 5 0.08 0.07
 -3 1 -5 0.13 0.07
 3 1 5 0.11 0.12
 3 -1 5 0.12 0.07
 3 -1 5 0.18 0.07
 -3 -1 -5 0.07 0.08
 -3 2 -5 4.64 0.3
 3 2 5 4.27 0.41
 -3 -2 5 3.63 0.29
 -3 -2 -5 4.29 0.32
 3 -2 5 4.55 0.29
 3 2 -5 4.52 0.28
 3 -2 5 4.08 0.33
 3 3 5 6.78 0.58
 -3 -3 5 5.76 0.43
 3 3 -5 6.9 0.4
 3 -3 5 6.02 0.46
 3 -3 5 6.65 0.42
 -3 -3 -5 6.17 0.46
 3 4 5 5.65 0.54
 3 4 5 6.06 0.55
 -3 -4 5 5.71 0.41
 3 4 -5 5.7 0.45
 3 -4 5 6.07 0.45
 3 -4 5 6.5 0.39
 3 -4 5 5.25 0.56
 -3 -5 5 4.05 0.25
 3 5 5 4.1 0.42
 3 5 5 4.01 0.47
 -3 -5 5 3.44 0.3
 3 5 -5 3.65 0.34
 3 -5 5 3.33 0.44
 3 -5 5 3.57 0.33
 3 -5 5 4.11 0.28
 3 6 5 8.91 0.72
 -3 -6 5 8.01 0.5
 3 6 5 8.35 0.71
 -3 -6 5 7.68 0.56
 3 -6 5 8.76 0.52
 3 6 -5 7.4 0.6
 3 -6 5 7.84 0.76
 -3 6 5 6.92 0.68
 3 -6 5 7.96 0.6
 3 7 5 10.55 0.88
 -3 -7 5 10.38 0.74
 -3 7 -5 10.4 0.76
 3 7 5 11.06 0.93
 3 7 -5 10.68 0.79
 -3 7 5 9.91 0.89
 3 -7 5 10.87 1
 3 -7 5 11.86 0.7
 3 -7 5 11 0.78
 -3 -8 5 0.6 0.13
 3 8 5 0.59 0.21
 3 8 5 0.34 0.24
 -3 8 -5 0.67 0.17
 3 8 -5 0.94 0.2
 -3 8 5 0.58 0.2
 3 -8 5 0.54 0.17
 3 -8 5 0.84 0.3
 -3 -9 5 9.2 0.73
 -3 9 -5 10.77 0.77
 3 9 5 11.22 0.94
 3 9 5 11.11 0.89
 -3 9 5 9.38 0.83
 3 9 -5 11.43 0.81
 3 -9 5 11.46 1.05
 -3 9 5 10.01 0.89
 3 -9 5 10.38 0.78
 -3 -10 5 0.46 0.14
 3 10 5 0.28 0.26
 3 10 5 0.24 0.23
 3 10 5 0.54 0.22
 3 10 -5 0.38 0.19
 -3 10 5 0.36 0.21
 -3 10 5 0.12 0.22
 3 -10 5 0.45 0.32
 3 -10 5 0.64 0.19
 3 11 5 4.06 0.51
 3 11 5 5.02 0.58
 3 11 5 5.02 0.56
 -3 11 5 4.79 0.53
 3 -11 5 5.14 0.47
 3 -11 5 2.52 1.04
 3 -11 5 5.77 0.75
 3 11 -5 5.38 0.5
 -3 11 5 5.32 0.56
 3 -12 -5 8.05 1.38
 3 12 5 7.08 0.73
 3 12 5 7.34 0.74
 3 -12 5 5.81 1.71
 -3 12 5 7.98 0.73
 3 -12 5 7.03 0.62
 3 -12 5 6.28 0.87
 3 12 -5 7.18 0.64
 -3 12 5 7.29 0.69
 3 13 5 3.29 0.52
 3 -13 -5 2.33 0.73
 3 13 5 3.83 0.51
 -3 -13 5 3.97 1.18
 -3 13 5 4.15 0.51
 3 -13 5 1.94 0.91
 3 13 -5 3.79 0.44
 3 -13 5 3.79 0.43
 3 -13 5 4.55 0.72
 -3 13 5 4.18 0.5
 3 -14 -5 0.83 0.57
 3 14 5 1.88 0.39
 3 14 5 1.91 0.29
 -3 -14 5 1.53 0.63
 3 14 5 2.48 0.46
 3 -14 5 2.31 0.55
 3 14 -5 1.57 0.25
 3 -14 5 0.55 0.64
 3 14 -5 1.71 0.32
 3 -14 5 1.6 0.31
 -3 14 5 1.6 0.36
 -3 -15 5 0.2 0.5
 3 -15 -5 0.3 0.48
 3 15 5 0.33 0.19
 3 15 5 0.13 0.27
 3 15 5 -0.03 0.28
 3 15 5 0.24 0.2
 3 -15 5 -0.04 0.57
 3 -15 5 0.75 0.42
 3 -15 5 0.42 0.24
 3 15 -5 -0.03 0.2
 -3 15 5 0.4 0.27
 3 15 -5 0.47 0.2
 3 15 -5 0.01 0.21
 3 15 -5 0.26 0.17
 3 16 5 1.32 0.37
 3 16 5 0.55 0.22
 -3 -16 5 0.26 0.52
 3 16 5 0.59 0.33
 3 16 5 1.27 0.23
 3 -16 -5 0.62 0.53
 3 -16 5 0.89 0.29
 3 16 -5 0.56 0.26
 3 16 -5 1.12 0.23
 3 -16 5 1.14 0.51
 3 16 -5 1.02 0.22
 -3 16 5 0.67 0.3
 3 -16 5 0.14 0.53
 3 17 5 0.49 0.2
 3 17 5 0.72 0.23
 3 17 5 0.47 0.33
 -3 -17 5 0.81 0.56
 3 -17 5 0.03 0.51
 -3 17 5 0.89 0.35
 3 17 -5 0.71 0.21
 3 17 -5 0.56 0.21
 3 17 -5 0.61 0.27
 3 -17 5 1.29 0.54
 3 18 5 -0.11 0.17
 -3 -18 5 -0.02 0.47
 3 18 5 0.16 0.19
 3 18 -5 0.27 0.2
 3 18 -5 0.32 0.19
 3 -18 5 -0.16 0.49
 3 19 5 0.1 0.2
 3 19 5 0.13 0.19
 -3 -19 5 -0.17 0.44
 3 -19 5 -0.44 0.45
 3 19 -5 -0.19 0.18
 3 19 -5 0.22 0.19
 3 20 5 0.72 0.2
 3 20 5 0.3 0.19
 -3 -20 5 0.49 0.48
 3 -20 5 0.07 0.46
 3 20 -5 0.25 0.19
 3 20 -5 0.44 0.2
 3 21 5 2.33 0.33
 -3 -21 5 0.9 0.52
 3 21 5 2.16 0.31
 3 21 -5 2.51 0.32
 3 -21 5 1.55 0.6
 3 21 -5 1.35 0.24
 3 22 5 0.02 0.15
 3 22 5 0.23 0.15
 3 22 -5 -0.21 0.15
 3 22 -5 -0.21 0.16
 3 23 5 -0.23 0.14
 3 23 5 0.08 0.14
 3 23 -5 -0.01 0.15
 3 23 -5 -0.13 0.14
 4 0 5 0.18 0.07
 4 0 5 0.16 0.08
 -4 0 -5 0.08 0.08
 4 0 5 0.28 0.11
 4 1 5 1.52 0.16
 4 1 5 1.26 0.24
 -4 1 -5 1.68 0.16
 -4 -1 -5 1.38 0.16
 4 -1 5 1.3 0.17
 4 1 -5 1.38 0.14
 4 -1 5 1.53 0.15
 -4 2 -5 38.04 2.3
 4 2 5 37.1 2.87
 4 2 -5 38.04 2.28
 4 -2 5 41.12 2.88
 4 -2 5 35.86 2.4
 4 -2 5 38.12 2.29
 -4 -2 -5 36.16 2.31
 4 3 5 69.57 5.17
 4 -3 5 66.71 4.33
 4 3 -5 73.43 4.13
 4 3 -5 68.63 4.45
 4 -3 5 69.45 4.14
 -4 -3 -5 63.71 4.17
 4 -3 5 69.29 5.19
 -4 -4 5 0.1 0.07
 4 4 5 0.32 0.18
 4 4 5 0.1 0.15
 -4 -4 -5 0.13 0.12
 4 -4 5 0.2 0.11
 4 4 -5 0.24 0.11
 4 -4 5 0.14 0.16
 4 -4 5 0.07 0.06
 4 5 5 144.75 9.03
 4 5 5 146.31 10.39
 -4 -5 5 130.37 8.69
 -4 -5 5 144.55 8.32
 4 -5 5 118.03 10.42
 4 -5 5 147.46 8.35
 4 -5 5 141.82 8.73
 4 5 -5 138.51 8.96
 -4 -6 5 6.35 0.4
 -4 -6 5 5.52 0.44
 4 6 5 6.27 0.59
 4 6 5 6.01 0.61
 4 -6 5 6.66 0.43
 4 6 -5 5.88 0.5
 4 -6 5 7.13 0.66
 4 -6 5 5.84 0.49
 -4 -7 5 37.22 2.48
 4 7 5 41.02 3.02
 4 7 5 38.64 2.68
 -4 7 5 37.44 2.97
 4 -7 5 42.32 2.39
 4 7 -5 37.63 2.59
 4 -7 5 36.74 3.05
 4 -7 5 41.6 2.54
 4 8 5 0.72 0.29
 4 8 5 1.03 0.25
 4 -8 5 0.92 0.19
 4 -8 5 0.44 0.29
 -4 8 5 1.33 0.26
 4 8 -5 0.64 0.2
 4 9 5 162.4 11.6
 4 9 5 164.97 10.11
 4 9 -5 154.37 10.01
 -4 9 5 151.5 11.56
 4 -9 5 134.31 11.67
 4 -9 5 165.87 9.76
 -4 9 5 149.29 10.04
 4 10 5 16.38 1.34
 4 10 5 14.9 1.2
 4 10 5 16.65 1.26
 -4 10 5 16.41 1.3
 4 10 -5 14.44 1.14
 4 -10 5 16.18 1.46
 -4 10 5 15.21 1.18
 4 -10 5 16.12 1.13
 4 11 5 32.78 2.55
 4 -11 -5 38.27 4.01
 4 11 5 32.23 2.29
 4 11 5 27.36 2.26
 -4 11 5 31.17 2.23
 4 -11 5 32.83 2.67
 4 -11 5 34.37 2.16
 4 11 -5 29.55 2.19
 -4 11 5 31.8 2.51
 4 12 5 1.06 0.3
 4 12 5 0.75 0.29
 4 12 5 1.09 0.36
 4 -12 5 0.53 0.77
 4 12 -5 1.44 0.29
 -4 12 5 0.94 0.3
 -4 12 5 1.73 0.33
 4 -12 5 0.74 0.23
 4 -12 5 1.06 0.43
 4 -13 -5 113.51 13.11
 4 13 5 104.96 8.46
 4 13 5 109.74 7.39
 4 -13 5 116.28 7.14
 -4 13 5 112.24 7.35
 4 13 -5 107.72 7.3
 4 -13 5 118.64 8.61
 4 14 5 1.1 0.22
 4 14 5 0.89 0.22
 -4 -14 5 1.29 0.55
 4 -14 -5 0.96 0.55
 4 14 5 0.87 0.32
 4 14 5 0.85 0.33
 4 -14 5 1.22 0.29
 4 14 -5 1.15 0.21
 4 -14 5 1.16 0.46
 4 -14 5 0.16 0.61
 4 14 -5 1.16 0.29
 -4 14 5 0.44 0.28
 4 -15 -5 11.87 1.9
 4 15 5 8.23 0.89
 4 15 5 9.04 0.96
 4 15 5 9.02 0.68
 4 15 5 9.8 0.69
 -4 -15 5 9.42 1.79
 4 -15 5 11.3 1.14
 4 15 -5 8.48 0.81
 4 15 -5 10.43 0.7
 4 15 -5 10.56 0.79
 4 -15 5 9.38 0.82
 4 -15 5 8.1 2.02
 4 15 -5 9.68 0.69
 -4 15 5 9.38 0.88
 4 16 5 1.35 0.38
 -4 -16 5 0.88 0.57
 4 -16 -5 0.91 0.58
 4 16 5 1.26 0.24
 4 16 5 1.3 0.38
 4 16 5 0.99 0.24
 4 16 -5 1.01 0.26
 4 -16 5 0.67 0.66
 4 -16 5 1.49 0.53
 -4 16 5 1.37 0.37
 4 16 -5 1.06 0.23
 4 16 -5 1.48 0.33
 4 16 -5 1.08 0.24
 -4 -17 5 75.91 8.59
 4 17 5 71.82 4.05
 4 17 5 62.06 4.71
 4 17 5 75.73 4.02
 4 -17 5 75.83 8.76
 4 17 -5 69.4 4.5
 4 -17 5 62.07 5.52
 4 17 -5 72.59 4.05
 4 17 -5 74.13 4.03
 4 17 -5 61.8 4.63
 -4 17 5 66.35 4.7
 4 18 5 -0.11 0.18
 -4 -18 5 -0.08 0.46
 4 18 5 -0.02 0.18
 4 18 -5 0.15 0.19
 4 18 -5 0.06 0.18
 4 -18 5 -0.09 0.53
 4 19 5 0.74 0.22
 4 19 5 0.88 0.22
 -4 -19 5 0.57 0.5
 4 19 -5 0.81 0.22
 4 19 -5 0.73 0.22
 4 -19 5 0.82 0.59
 4 20 5 3.58 0.39
 -4 -20 5 3.98 1.22
 4 20 5 3.99 0.42
 4 20 -5 4 0.41
 4 -20 5 4.77 1.34
 4 20 -5 3.83 0.4
 4 21 5 57.85 3.61
 -4 -21 5 62.63 7.66
 4 21 5 67.23 3.66
 4 21 -5 62.97 3.63
 4 21 -5 65.66 3.66
 4 -21 5 61.06 7.65
 4 22 5 1.6 0.24
 4 22 5 2.09 0.31
 4 22 -5 1.8 0.24
 4 22 -5 2.37 0.3
 4 23 5 1.73 0.26
 4 23 5 2.19 0.28
 4 23 -5 1.94 0.27
 4 23 -5 2.45 0.27
 5 0 5 0.07 0.07
 5 0 5 0.09 0.08
 -5 0 -5 0.12 0.09
 5 0 5 0.15 0.1
 -5 1 -5 10.12 0.61
 5 1 5 9.73 0.6
 5 1 5 8.77 0.61
 5 1 5 8.98 0.75
 5 -1 5 9.85 0.6
 5 -1 5 8.86 0.62
 5 1 -5 8.07 0.58
 -5 -1 -5 9.15 0.61
 5 2 5 2.29 0.31
 -5 2 -5 2.52 0.22
 5 2 -5 2.5 0.2
 5 -2 5 2.49 0.24
 5 -2 5 2.47 0.21
 5 -2 5 2.26 0.32
 -5 -2 -5 2.37 0.23
 5 -3 -5 12.38 0.93
 5 3 5 10.15 0.87
 5 3 5 12.03 0.76
 -5 -3 -5 9.27 0.69
 5 3 -5 10.04 0.73
 5 -3 5 9.45 0.71
 5 -3 5 10.01 0.67
 5 3 -5 10.51 0.66
 5 -3 5 10.62 0.88
 5 4 5 2.62 0.37
 5 4 5 3.02 0.35
 5 -4 5 2.87 0.23
 5 -4 5 2.96 0.38
 -5 -4 -5 2.13 0.27
 5 4 -5 2.9 0.22
 5 -4 5 2.84 0.28
 5 4 -5 2.94 0.29
 -5 -5 5 53.61 3.16
 5 5 5 52.83 3.99
 5 5 5 57.97 3.49
 5 5 -5 52.1 3.43
 5 -5 5 53.44 3.18
 5 -5 5 43.99 4
 5 -5 5 53.51 3.35
 5 6 5 0.18 0.18
 5 6 5 0.4 0.23
 5 -6 5 0.16 0.22
 5 -6 5 0.41 0.15
 5 6 -5 0.3 0.15
 5 -6 5 0.22 0.09
 5 7 5 2.93 0.39
 5 7 5 2.13 0.39
 5 -7 5 2.5 0.32
 5 -7 5 2.04 0.4
 5 -7 5 2.99 0.24
 -5 7 5 1.88 0.33
 5 7 -5 2.3 0.31
 5 8 5 0.23 0.28
 5 8 5 0.55 0.22
 -5 8 5 0.51 0.19
 5 -8 5 0.33 0.29
 5 -8 5 0.38 0.17
 5 8 -5 0.48 0.18
 5 9 5 29.05 2.05
 5 9 5 28.27 2.25
 -5 9 5 27.16 2.2
 5 -9 5 28.46 1.9
 5 -9 5 29.36 2.33
 5 9 -5 27.82 1.93
 5 10 5 0.35 0.28
 5 10 5 0.36 0.22
 5 10 5 0.79 0.28
 5 -10 5 0.59 0.34
 -5 10 5 0.29 0.24
 5 10 -5 0.12 0.19
 -5 10 5 0.06 0.19
 5 -10 5 0.14 0.67
 5 -10 5 -0.01 0.16
 5 11 5 0.4 0.24
 5 11 5 0.13 0.29
 5 11 5 0.18 0.26
 5 -11 5 -0.06 0.17
 5 11 -5 0.12 0.2
 -5 11 5 0.06 0.23
 5 -11 5 -0.18 0.7
 -5 11 5 0.13 0.2
 5 -11 5 0.32 0.33
 5 12 5 0.33 0.26
 5 12 5 0.3 0.24
 5 12 5 0.32 0.3
 5 -12 -5 0.26 0.42
 5 -12 5 -0.06 0.59
 5 -12 5 0.36 0.21
 5 12 -5 0.33 0.23
 -5 12 5 0.3 0.26
 5 -12 5 0.18 0.35
 5 13 5 0.72 0.32
 5 13 5 0.74 0.2
 5 13 5 0.53 0.28
 5 13 5 0.23 0.27
 5 -13 -5 0.65 0.48
 -5 13 5 0.66 0.29
 5 -13 5 0.41 0.39
 5 13 -5 0.23 0.17
 5 -13 5 0.47 0.23
 5 -13 5 -0.06 0.66
 5 13 -5 0.71 0.26
 5 -14 -5 1.46 0.6
 5 14 5 0.98 0.23
 5 14 5 1.26 0.23
 5 14 5 1.38 0.37
 5 14 5 0.81 0.33
 5 -14 5 0.82 0.73
 5 14 -5 1.46 0.24
 5 -14 5 0.37 0.41
 5 14 -5 1.32 0.24
 5 14 -5 1.08 0.25
 5 14 -5 1.26 0.31
 -5 14 5 1.49 0.35
 5 -14 5 1.49 0.31
 5 -15 -5 6.78 1.46
 5 15 5 5.35 0.66
 5 15 5 5.22 0.46
 5 15 5 4.2 0.44
 5 15 5 4.82 0.64
 5 -15 5 3.42 1.15
 5 -15 5 3.7 0.8
 -5 15 5 5.25 0.61
 5 15 -5 4.56 0.51
 5 15 -5 4.53 0.54
 5 -15 5 5.59 0.57
 5 15 -5 5.06 0.46
 5 15 -5 5.15 0.46
 5 -16 -5 0.02 0.46
 5 -16 -5 -0.71 0.5
 5 16 5 0.02 0.17
 -5 -16 5 -0.02 0.44
 5 16 5 0.51 0.21
 5 16 5 0.01 0.31
 5 16 -5 0.3 0.19
 5 -16 5 0.22 0.66
 5 16 -5 0.32 0.24
 5 -16 5 0.85 0.5
 -5 16 5 -0.21 0.27
 5 16 -5 0.25 0.19
 5 16 -5 0.36 0.22
 5 17 5 0.14 0.2
 -5 -17 5 0.2 0.5
 5 -17 -5 0.42 0.49
 5 17 5 0.08 0.31
 5 -17 -5 -0.12 0.57
 5 17 5 -0.02 0.18
 5 -17 5 -0.2 0.49
 5 17 -5 0.42 0.19
 -5 17 5 -0.36 0.28
 5 -17 5 0.19 0.6
 5 17 -5 0.36 0.25
 5 17 -5 0.25 0.2
 5 17 -5 0.17 0.22
 5 18 5 -0.2 0.18
 -5 -18 5 -0.07 0.47
 5 18 5 0.01 0.19
 5 -18 5 0.07 0.6
 5 18 -5 0.52 0.2
 5 18 -5 0.45 0.21
 5 18 -5 0.27 0.25
 5 19 5 0.29 0.2
 -5 -19 5 0.12 0.48
 5 19 5 0.07 0.19
 5 -19 5 0.11 0.53
 5 19 -5 0.26 0.19
 5 19 -5 0.47 0.2
 5 20 5 0.28 0.18
 5 20 5 0.15 0.18
 -5 -20 5 -0.17 0.4
 5 20 -5 -0.01 0.18
 5 20 -5 0.09 0.17
 5 -20 5 -0.04 0.47
 5 21 5 2.62 0.32
 5 21 5 3.12 0.35
 -5 -21 5 1.35 0.57
 5 21 -5 2.56 0.32
 5 -21 5 1.17 0.58
 5 21 -5 3.05 0.33
 5 22 5 -0.02 0.15
 5 22 5 -0.04 0.15
 5 22 -5 -0.22 0.14
 5 22 -5 -0.15 0.15
 5 23 5 0.72 0.16
 5 23 5 0.79 0.18
 5 23 -5 0.87 0.18
 5 23 -5 0.87 0.15
 6 0 -5 0 0.08
 -6 0 -5 0.33 0.11
 6 0 5 0.03 0.07
 6 0 5 -0.03 0.09
 6 0 5 0.03 0.08
 6 1 5 99.14 6.16
 -6 1 -5 101.33 5.93
 6 1 5 104.91 7.34
 6 1 5 103.6 5.93
 6 -1 5 91.77 6.16
 6 1 -5 88.97 5.91
 -6 -1 -5 98.57 5.94
 6 -1 5 98.3 5.92
 -6 2 -5 3.03 0.26
 6 2 5 3.04 0.33
 6 -2 5 2.61 0.23
 6 -2 5 2.4 0.26
 6 -2 5 2.86 0.37
 6 2 -5 2.81 0.23
 -6 -2 -5 2.68 0.26
 6 -3 -5 55.21 3.79
 6 3 5 57.01 3.25
 6 3 5 47.93 3.77
 6 -3 5 48.26 3.02
 6 3 -5 49.16 3.01
 6 -3 5 45.44 3.15
 6 -3 5 44.99 3.78
 6 -4 -5 13.75 1.08
 6 4 5 14.18 0.89
 6 4 5 11.37 1.01
 6 -4 5 11.44 0.83
 6 -4 5 11.77 0.78
 6 4 -5 11.45 0.85
 6 4 -5 12.06 0.77
 6 -4 5 11.83 1.04
 6 -5 -5 137.43 9.85
 6 5 5 129.51 9.74
 6 5 5 146.74 8.44
 6 5 -5 128.22 8.39
 6 -5 5 118.85 9.77
 6 -5 5 127.02 8.17
 6 -5 5 122.98 7.82
 6 6 5 25.59 1.66
 6 6 5 22.14 1.84
 6 -6 5 22.78 1.45
 6 -6 5 22.99 1.54
 6 6 -5 22.77 1.58
 6 -6 5 22.97 1.88
 6 7 5 21.96 1.77
 6 7 5 21.04 1.6
 -6 7 5 18.74 1.72
 6 -7 5 25.57 1.85
 6 -7 5 23.12 1.49
 6 -7 5 22.5 1.39
 6 7 -5 21.99 1.52
 6 8 5 1.86 0.39
 6 8 5 2.19 0.36
 6 -8 5 1.79 0.42
 6 -8 5 1.68 0.3
 6 8 -5 1.92 0.32
 -6 8 5 1.89 0.33
 6 9 5 85.82 6.09
 6 9 5 94.44 6.86
 6 9 5 85.96 6
 6 -9 5 97.77 5.77
 6 -9 5 89.83 6.94
 -6 9 5 92.23 6.8
 6 9 -5 85.82 5.9
 6 10 5 11.55 1
 6 10 5 12.96 1.12
 6 10 5 11.19 1.08
 -6 10 5 13.14 1.07
 6 -10 5 13.86 1.28
 6 -10 5 13.07 0.95
 6 10 -5 11.82 0.96
 6 11 5 8.15 0.88
 6 11 5 8.7 0.81
 6 -11 -5 12.97 1.62
 6 11 5 9.36 0.9
 6 11 -5 8.76 0.77
 6 -11 5 9.95 0.77
 -6 11 5 8.07 0.8
 6 -11 5 9.19 1.04
 6 12 5 2.83 0.48
 6 12 5 3.6 0.49
 6 -12 -5 2.52 0.69
 6 12 5 2.78 0.52
 6 -12 5 2.77 0.6
 6 -12 5 2.3 0.39
 6 12 -5 3.51 0.43
 -6 12 5 3.65 0.49
 6 13 5 116.18 6.45
 6 13 5 109.76 8.66
 6 -13 -5 115.93 13.4
 6 13 5 104.54 7.7
 6 13 5 112.95 7.59
 6 13 -5 117.46 6.47
 -6 13 5 119.05 7.53
 6 -13 5 121.12 8.84
 6 13 -5 107.66 7.47
 6 -13 5 117.49 7.3
 6 14 5 9.62 0.69
 6 14 5 9.65 0.95
 6 14 5 9.54 0.68
 6 -14 -5 7.23 1.35
 -6 -14 5 8.16 0.73
 6 14 5 8.34 0.75
 6 14 5 10.43 0.97
 6 -14 -5 10.99 1.85
 6 14 -5 9.39 0.78
 6 -14 5 7.45 2.16
 6 14 -5 8.88 0.68
 6 14 -5 9.88 0.82
 6 14 -5 10.38 0.7
 6 -14 5 10.61 1.16
 -6 14 5 9.79 0.89
 -6 -14 -5 10.34 0.74
 6 -14 5 9.75 0.82
 6 15 5 0.97 0.22
 -6 -15 5 0.52 0.53
 6 -15 -5 0.09 0.48
 6 15 5 1.19 0.39
 6 15 5 0.7 0.22
 6 -15 -5 -0.02 0.63
 6 -15 5 0.26 0.7
 6 15 -5 0.62 0.26
 6 -15 5 0.24 0.45
 -6 15 5 0.15 0.28
 6 -15 5 0.62 0.27
 6 15 -5 0.73 0.21
 6 15 -5 0.96 0.22
 6 15 -5 0.62 0.23
 6 -16 -5 9.08 1.37
 6 16 5 9.14 0.97
 6 -16 -5 11.07 1.95
 6 16 5 10.29 0.73
 6 16 5 9.72 0.72
 -6 -16 5 10.93 1.95
 6 -16 5 8.94 1.16
 6 -16 5 10.45 2.33
 6 16 -5 9.54 0.86
 6 16 -5 9.72 0.81
 6 16 -5 10.22 0.72
 6 16 -5 11.18 0.75
 -6 16 5 10.21 0.94
 6 17 5 64.75 3.4
 6 17 5 62.82 3.42
 6 -17 -5 48.65 4.81
 6 17 5 48.41 3.98
 -6 -17 5 61.63 7.31
 6 -17 -5 64.48 7.18
 -6 17 5 55.73 3.99
 6 17 -5 49.75 3.91
 6 -17 5 49.01 4.67
 6 -17 5 61.93 7.55
 6 17 -5 61.7 3.81
 6 17 -5 63.8 3.41
 6 17 -5 62.66 3.42
 6 18 5 9.7 0.72
 6 18 5 11.02 0.73
 -6 -18 5 10.41 1.92
 6 -18 5 9.13 2.06
 6 18 -5 8.86 0.73
 6 18 -5 9.89 0.72
 6 18 -5 9.83 0.81
 6 19 5 1.38 0.25
 6 19 5 1.46 0.26
 -6 -19 5 0.85 0.58
 6 19 -5 1.32 0.28
 6 19 -5 1.19 0.23
 6 -19 5 0.5 0.6
 6 19 -5 0.9 0.24
 6 20 5 4.11 0.41
 -6 -20 5 4.89 1.26
 6 20 5 4.29 0.39
 6 20 -5 3.76 0.39
 6 20 -5 3.23 0.39
 6 -20 5 2.62 0.84
 6 21 5 30.41 1.86
 -6 -21 5 32.51 4.1
 6 21 5 32.45 1.87
 6 -21 5 29.41 4.03
 6 21 -5 30.34 1.87
 6 21 -5 32.72 1.87
 6 22 5 2.66 0.32
 6 22 5 3.42 0.33
 6 22 -5 2.57 0.31
 6 22 -5 3.05 0.31
 6 23 5 0.06 0.13
 6 23 5 -0.01 0.13
 6 23 -5 0.18 0.14
 6 23 -5 0.15 0.12
 7 0 -5 0.07 0.09
 7 0 5 0.11 0.08
 7 0 5 0 0.09
 7 -1 -5 1.8 0.21
 7 1 5 2.22 0.21
 7 1 5 2.18 0.2
 7 -1 5 2.03 0.2
 7 -1 5 2.3 0.22
 7 1 -5 2.08 0.2
 7 2 5 1.03 0.16
 7 -2 -5 1.12 0.2
 7 2 5 0.95 0.16
 7 2 5 1.02 0.19
 7 -2 5 0.88 0.14
 7 -2 5 0.82 0.22
 7 2 -5 0.6 0.12
 7 -2 5 0.84 0.14
 7 3 5 2.12 0.32
 7 3 5 2.6 0.25
 7 -3 -5 1.96 0.36
 7 3 -5 2.01 0.2
 7 -3 5 2.05 0.2
 7 -3 5 2.26 0.35
 7 -3 5 1.8 0.24
 7 4 5 2.54 0.28
 7 4 5 1.92 0.33
 7 -4 -5 2.09 0.39
 7 4 -5 2.07 0.2
 7 -4 5 1.91 0.36
 7 -4 5 1.65 0.2
 7 -4 5 1.72 0.25
 7 5 5 0.73 0.22
 7 5 5 0.7 0.21
 7 -5 -5 0.23 0.28
 7 -5 5 0.5 0.12
 7 -5 5 0.57 0.25
 7 5 -5 0.41 0.16
 7 -5 5 0.78 0.16
 7 -6 -5 13.33 1.22
 7 6 5 13.84 0.97
 7 6 5 11.33 1.03
 7 6 -5 11.34 0.88
 7 -6 5 12.63 1.09
 7 -6 5 11.11 0.79
 7 -6 5 11.58 0.86
 7 7 5 6.02 0.65
 7 -7 -5 6.28 0.95
 7 7 5 5.01 0.61
 7 -7 5 6.12 0.71
 7 -7 5 6.38 0.52
 7 7 -5 6.81 0.55
 7 8 5 0.55 0.31
 7 -8 -5 -0.04 0.53
 7 8 5 0.6 0.25
 -7 8 5 0.57 0.22
 7 8 -5 0.59 0.22
 7 -8 5 0.63 0.19
 7 -8 5 0.27 0.31
 7 9 5 4.81 0.51
 7 9 5 4.98 0.66
 7 -9 -5 2.29 0.83
 7 9 5 5.09 0.57
 7 -9 5 3.32 1.06
 7 -9 5 5.44 0.48
 -7 9 5 5.1 0.51
 7 9 -5 4.48 0.49
 7 -9 5 3.81 0.67
 7 10 5 1.68 0.36
 7 -10 -5 2.19 0.82
 7 10 5 2.09 0.41
 7 10 5 2.01 0.47
 7 -10 -5 4.14 1.01
 7 -10 5 2.3 0.35
 7 10 -5 1.82 0.33
 7 -10 5 2.51 0.53
 7 -10 5 0.96 0.88
 7 -11 -5 5.04 1.14
 7 11 5 5.58 0.63
 7 11 5 4.95 0.74
 7 11 5 6.15 0.67
 7 -11 -5 7.27 1.41
 7 -11 5 6.66 0.57
 7 11 -5 5.66 0.57
 7 -11 5 4.71 0.78
 -7 11 5 5.23 0.61
 7 12 5 0.87 0.35
 7 12 5 0.76 0.42
 7 -12 -5 0.19 0.74
 7 12 5 0.43 0.28
 7 -12 -5 0.65 0.45
 7 12 -5 0.7 0.25
 7 -12 5 0.64 0.25
 -7 12 5 0.34 0.29
 7 -12 5 0.49 0.44
 7 -12 5 0.49 0.78
 7 13 5 5.78 0.67
 -7 -13 5 4.68 0.52
 7 13 5 4.78 0.44
 7 13 5 5.96 0.75
 7 13 5 5.74 0.65
 7 13 5 5.75 0.47
 7 -13 -5 5.15 1.12
 7 -13 -5 4.87 1.4
 -7 13 5 6.11 0.65
 7 -13 5 6.29 0.58
 7 13 -5 4.95 0.53
 7 13 -5 5.21 0.48
 -7 -13 -5 4.4 0.52
 7 13 -5 5.44 0.57
 7 13 -5 5.43 0.47
 7 -13 5 4.99 0.85
 7 14 5 -0.06 0.19
 7 -14 -5 0.36 0.49
 7 14 5 0.38 0.3
 7 14 5 0.45 0.22
 7 14 5 0.43 0.2
 7 -14 -5 0.73 0.77
 7 14 5 0.47 0.37
 -7 -14 5 0.51 0.28
 7 14 -5 0.48 0.2
 -7 14 5 0.54 0.3
 7 14 -5 0.32 0.22
 -7 -14 -5 -0.04 0.26
 7 14 -5 0.89 0.21
 7 -14 5 0.44 0.27
 7 -14 5 1.03 0.51
 7 -14 5 0.35 0.75
 7 14 -5 0.72 0.28
 7 -15 -5 0.5 0.51
 7 15 5 0.71 0.25
 7 15 5 1.26 0.43
 7 15 5 1.05 0.23
 7 15 5 1.53 0.25
 7 -15 -5 0.85 0.69
 -7 15 5 1.21 0.37
 -7 -15 -5 1.52 0.33
 7 15 -5 1.04 0.24
 7 -15 5 0.31 0.8
 7 15 -5 0.83 0.26
 7 15 -5 1.34 0.33
 7 15 -5 1.08 0.23
 7 -15 5 1.38 0.56
 7 16 5 3.58 0.42
 7 -16 -5 2.5 0.82
 7 16 5 3.08 0.45
 7 16 5 4.84 0.43
 7 16 5 3.69 0.63
 -7 -16 5 5.26 1.43
 7 -16 -5 2.58 0.9
 7 16 -5 3.92 0.48
 7 16 -5 4.18 0.42
 -7 16 5 4.39 0.59
 7 -16 5 4.1 0.79
 7 -16 5 1.78 1.02
 7 16 -5 3.36 0.49
 7 16 -5 3.96 0.41
 -7 -17 5 0.37 0.55
 7 -17 -5 1.09 0.57
 7 17 5 1.13 0.24
 7 17 5 1 0.25
 7 17 -5 0.81 0.22
 7 17 -5 1.38 0.29
 7 17 -5 1.08 0.23
 7 -17 5 0.91 0.78
 7 -17 5 1.13 0.62
 7 18 5 0.75 0.22
 7 18 5 0.99 0.24
 -7 -18 5 0.7 0.56
 7 18 -5 1.22 0.28
 7 18 -5 1.33 0.25
 7 -18 5 0.26 0.62
 7 18 -5 0.66 0.22
 7 19 5 -0.2 0.18
 -7 -19 5 -0.03 0.48
 7 19 5 0.04 0.19
 7 19 -5 0.18 0.24
 7 19 -5 0.02 0.18
 7 19 -5 0.02 0.17
 7 -19 5 -0.59 0.48
 -7 -20 5 1.79 0.69
 7 20 5 3.4 0.35
 7 20 5 3.97 0.38
 7 20 -5 2.97 0.34
 7 -20 5 2.07 0.73
 7 20 -5 2.78 0.35
 7 20 -5 3.54 0.43
 7 21 5 3.36 0.36
 -7 -21 5 3.69 1.14
 7 21 5 3.79 0.37
 7 -21 5 4.09 1.17
 7 21 -5 3.16 0.35
 7 21 -5 3.3 0.36
 7 22 5 2.01 0.28
 7 22 5 1.73 0.28
 7 22 -5 2.34 0.27
 7 22 -5 2.18 0.27
 7 23 5 -0.05 0.13
 7 23 -5 0.05 0.11
 8 0 5 0.04 0.1
 8 0 -5 0.3 0.11
 8 0 5 0.17 0.09
 8 1 5 11.99 0.74
 8 1 5 11.17 0.73
 8 -1 -5 11.54 0.91
 8 -1 -5 9.85 0.73
 8 -1 5 12.11 0.74
 8 -1 5 11.05 0.75
 8 1 -5 9.78 0.72
 8 -2 -5 113.48 7.53
 8 2 5 132.86 8.04
 8 -2 -5 139.53 9.36
 8 -2 5 122.67 7.83
 8 -2 5 122.01 7.52
 8 2 -5 118.1 7.51
 8 3 5 4.27 0.45
 8 3 5 4.5 0.35
 8 -3 -5 4.28 0.46
 8 -3 5 3.21 0.33
 8 3 -5 3.35 0.3
 8 -3 5 4.25 0.48
 8 -3 5 3.91 0.32
 8 4 5 0.97 0.24
 8 4 5 1.56 0.25
 8 -4 -5 1.13 0.29
 8 -4 5 0.9 0.16
 8 4 -5 0.7 0.14
 8 -4 5 1.01 0.28
 8 -4 5 1.01 0.17
 8 5 5 23.72 1.39
 8 -5 -5 21.27 1.67
 8 5 5 17.46 1.57
 8 -5 5 17.98 1.31
 8 5 -5 19.38 1.35
 8 -5 5 18.08 1.6
 8 6 5 69.53 5.85
 8 -6 -5 84.12 5.97
 8 6 5 87.49 5.1
 8 6 -5 75.06 5.05
 8 -6 5 73.77 4.91
 8 -6 5 75.12 5.91
 8 7 5 5.96 0.6
 8 7 5 4.66 0.56
 8 -7 -5 5.43 0.83
 8 7 -5 4.75 0.49
 8 -7 5 4.89 0.64
 8 -7 5 4.74 0.47
 8 8 5 6.83 0.71
 8 -8 -5 6.86 1.07
 8 8 5 7.77 0.76
 8 8 5 6.89 0.62
 8 -8 5 7.52 1.58
 8 8 -5 6.79 0.61
 8 -8 5 6.67 0.8
 -8 8 5 5.65 0.66
 8 -8 5 7.4 0.6
 8 -9 -5 33.03 3.42
 8 9 5 38.35 2.77
 8 -9 -5 44.86 4.85
 8 9 5 41.99 3.16
 8 9 5 36.24 2.82
 8 9 -5 40.75 2.71
 8 -9 5 37.77 3.22
 8 -9 5 41.01 5.31
 8 -9 5 42.48 2.65
 8 -10 -5 60.01 6.86
 8 10 5 55.53 3.93
 8 10 5 59.6 4.45
 8 10 5 47.6 3.92
 8 10 -5 54.63 3.82
 8 -10 5 62.84 4.57
 8 -10 5 60.23 3.74
 8 11 5 1.15 0.35
 8 11 5 1.63 0.36
 8 11 5 2.08 0.51
 8 -11 -5 4.04 1.14
 8 -11 -5 1.21 0.79
 8 11 -5 1.29 0.32
 8 -11 5 1.81 0.32
 8 -11 5 1.49 0.5
 8 -11 5 0.09 0.72
 -8 11 5 1.36 0.39
 8 -12 -5 6.05 1.32
 -8 -12 5 7.54 0.64
 8 -12 -5 7.53 1.6
 8 12 5 6.68 0.56
 8 12 5 8.18 0.77
 8 12 5 6.74 0.87
 8 12 -5 6.68 0.56
 -8 12 5 8.41 0.78
 -8 -12 -5 7.6 0.62
 8 12 -5 6.79 0.68
 8 -12 5 7.63 0.69
 8 -12 5 8.42 1
 8 13 5 11.07 0.81
 8 13 5 12.28 0.82
 8 -13 -5 12.82 2.11
 -8 -13 5 10.41 0.8
 8 13 5 10.9 0.91
 8 -13 -5 10.34 1.61
 8 13 5 13.17 1.06
 -8 -13 5 12.86 0.89
 8 13 5 11.71 1.14
 8 -13 5 14.11 1.01
 8 13 -5 13.01 0.84
 8 13 -5 12.22 0.99
 8 13 -5 11.75 0.82
 -8 -13 -5 10.42 0.81
 8 -13 5 11.59 1.33
 8 13 -5 12.52 0.94
 -8 13 5 12.82 1.06
 -8 -13 -5 13.46 0.88
 8 -14 -5 34.81 4.58
 8 14 5 31.01 2.59
 8 14 5 35.61 2.11
 8 -14 -5 28.1 3.21
 8 14 5 38.97 2.12
 8 14 5 33.93 2.36
 -8 -14 5 37.15 2.17
 8 14 -5 36.67 2.37
 8 14 -5 36.75 2.12
 8 14 -5 38.53 2.13
 8 -14 5 38.42 2.46
 8 14 -5 32.41 2.46
 -8 -14 -5 31.22 2.09
 -8 14 5 36.79 2.54
 -8 -14 -5 36.08 2.15
 8 -14 5 36.25 3.05
 8 15 5 0.35 0.38
 8 -15 -5 0.26 0.66
 8 -15 -5 0.12 0.48
 -8 -15 5 0.21 0.29
 8 15 5 -0.03 0.22
 8 15 5 0.41 0.21
 8 15 5 0.12 0.2
 8 -15 5 0.47 0.51
 8 15 -5 0.07 0.19
 8 15 -5 0.1 0.22
 8 -15 5 -0.32 0.8
 -8 -15 -5 0.58 0.29
 8 15 -5 0 0.23
 -8 15 5 -0.1 0.29
 8 15 -5 0.15 0.25
 8 -16 -5 8.55 1.39
 8 16 5 9.88 0.74
 8 16 5 8.03 0.96
 8 16 5 10.25 0.74
 8 16 5 9.43 0.81
 8 -16 -5 11.25 1.93
 -8 -16 5 13.72 2.07
 8 16 -5 10.68 0.73
 8 -16 5 9.67 1.21
 8 16 -5 9.63 0.82
 8 16 -5 11.22 0.75
 8 -16 5 9.57 2.34
 -8 -16 -5 8.92 0.78
 -8 16 5 11.17 0.98
 8 16 -5 8.62 0.86
 -8 -17 5 14.62 2.38
 8 17 5 15.1 0.95
 8 -17 -5 14.53 2.25
 8 17 5 13.19 0.93
 8 17 5 14 1.04
 8 17 -5 13.04 1.04
 8 17 -5 13.47 0.93
 8 17 -5 13.2 0.94
 8 -17 5 11.31 2.63
 -8 -18 5 21.85 3.26
 8 18 5 23.32 1.4
 8 18 5 22.15 1.39
 8 18 -5 22.35 1.56
 8 -18 5 17.93 3.31
 8 18 -5 22.15 1.39
 8 18 -5 23.57 1.41
 8 19 5 0.27 0.18
 -8 -19 5 0.3 0.52
 8 19 5 0.42 0.19
 8 19 -5 0.31 0.19
 8 19 -5 0.3 0.18
 8 19 -5 0.4 0.24
 8 -19 5 -0.56 0.48
 -8 -20 5 16.91 2.46
 8 20 5 16.11 0.99
 8 20 5 14.68 0.99
 8 20 -5 15.01 1.12
 8 20 -5 15.54 0.98
 8 -20 5 15.77 2.44
 8 20 -5 14.76 0.99
 8 21 5 3.78 0.37
 8 21 5 4.06 0.36
 8 21 -5 3.77 0.35
 8 21 -5 3.67 0.44
 8 21 -5 3.63 0.36
 8 22 5 8.53 0.54
 8 22 5 7.21 0.55
 8 22 -5 7.43 0.55
 8 22 -5 8.19 0.53
 9 0 -5 -0.08 0.1
 9 0 5 0.14 0.09
 9 0 5 0.03 0.11
 9 1 5 0.43 0.09
 9 -1 5 0.39 0.14
 9 -1 5 0.46 0.11
 9 1 -5 0.31 0.12
 9 -2 -5 44.8 3.11
 9 2 -5 37.37 2.48
 9 -2 5 41.78 2.43
 9 -2 5 38.5 2.59
 9 3 5 0.95 0.17
 9 -3 -5 1.21 0.25
 9 -3 5 0.94 0.26
 9 3 -5 1.18 0.17
 9 -3 5 0.81 0.16
 9 4 5 11.89 0.85
 9 -4 -5 12.86 1.04
 9 -4 5 12.13 1.04
 9 -4 5 10.14 0.81
 9 -5 -5 1.02 0.33
 9 5 5 0.88 0.23
 9 -5 5 0.87 0.19
 9 -5 5 0.82 0.3
 9 6 5 17.8 1.14
 9 -6 -5 17.82 1.42
 9 6 5 12.31 1.09
 9 -6 5 13.76 1.04
 9 6 -5 15.25 1.09
 9 -6 5 15.36 1.32
 9 7 5 19.42 1.58
 9 7 5 25.16 1.65
 9 -7 -5 26.17 2.04
 9 7 5 19.57 1.81
 9 -7 5 23.27 1.89
 9 7 -5 21.46 1.55
 9 -7 5 25.16 3.05
 9 -7 5 21.72 1.52
 9 8 5 8.54 0.86
 9 8 5 7.5 0.73
 9 8 5 9.08 0.85
 9 -8 -5 8.84 1.15
 9 8 -5 9.49 0.75
 9 -8 5 9.21 1.77
 9 -8 5 8.93 0.72
[truncated: 1,168,230 more chars]
